# Supplementary material
Source: bioRxiv or medRxiv preprint supplement (https://www.biorxiv.org/highwire/filestream/7121/field_highwire_adjunct_files/2/026153-3.pdf)

Nilotinib:CAL-85-1

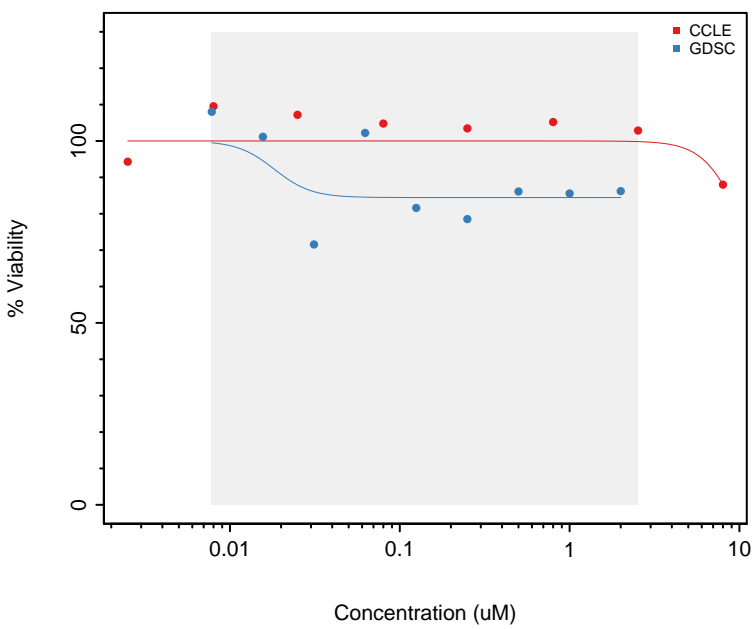

Nilotinib:Calu-3

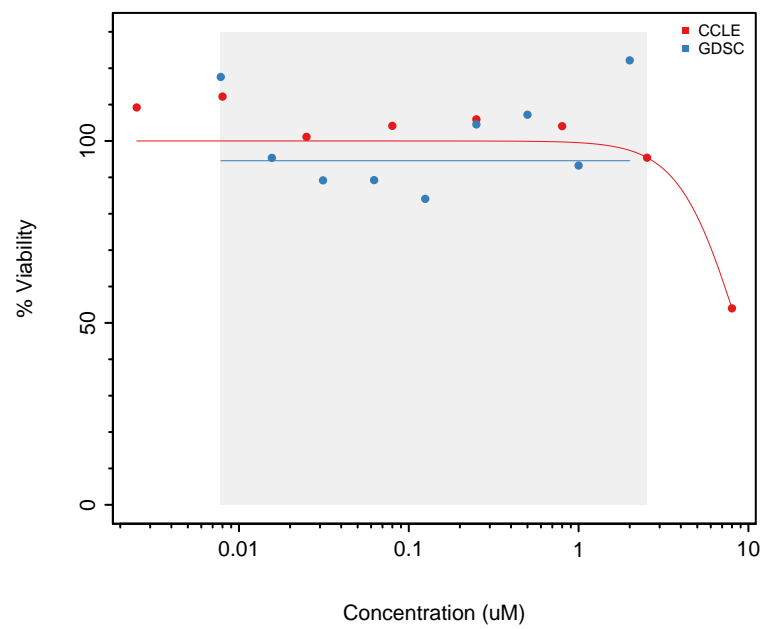

Nilotinib:CAMA-1

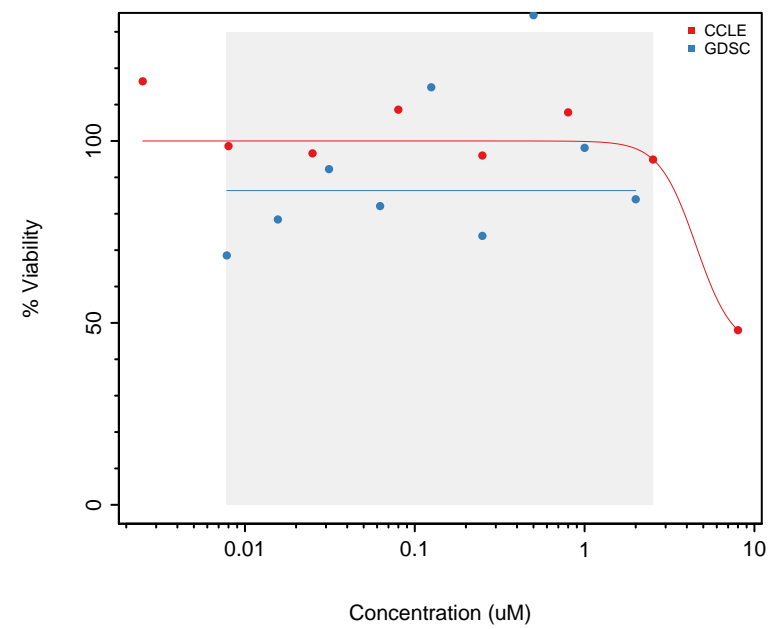

Nilotinib:Capan-2

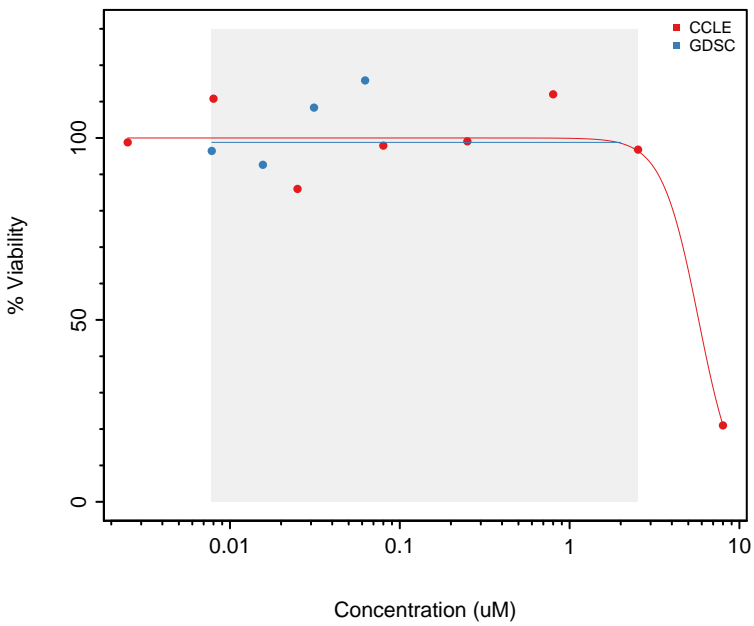

Nilotinib:CAS-1

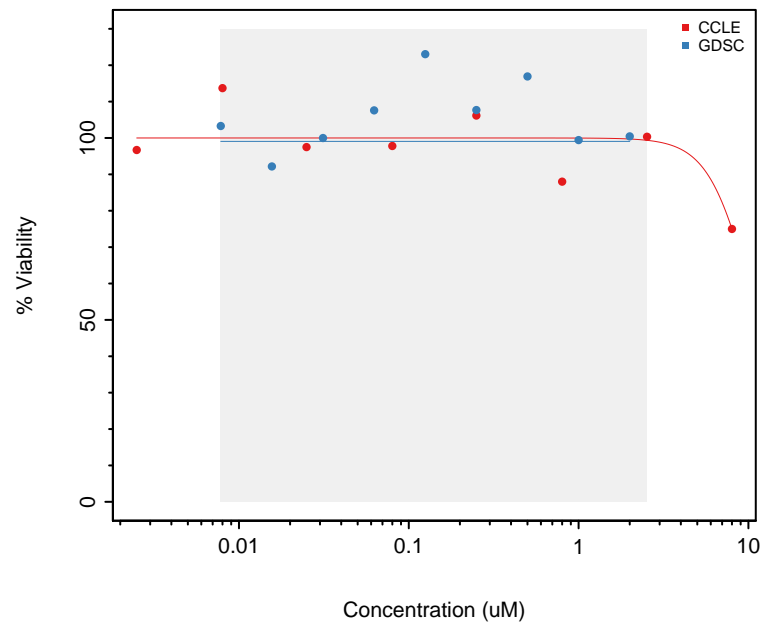

Nilotinib:CHL-1

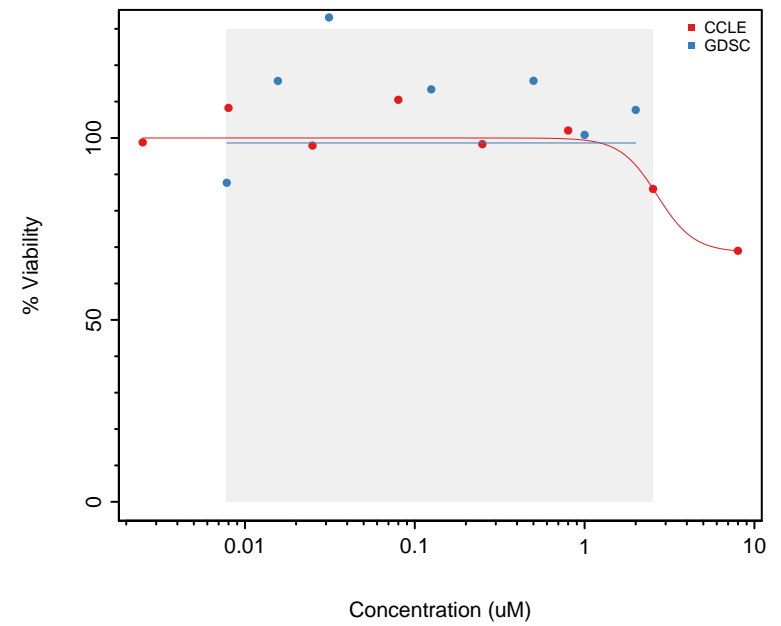

Nilotinib:COLO-205

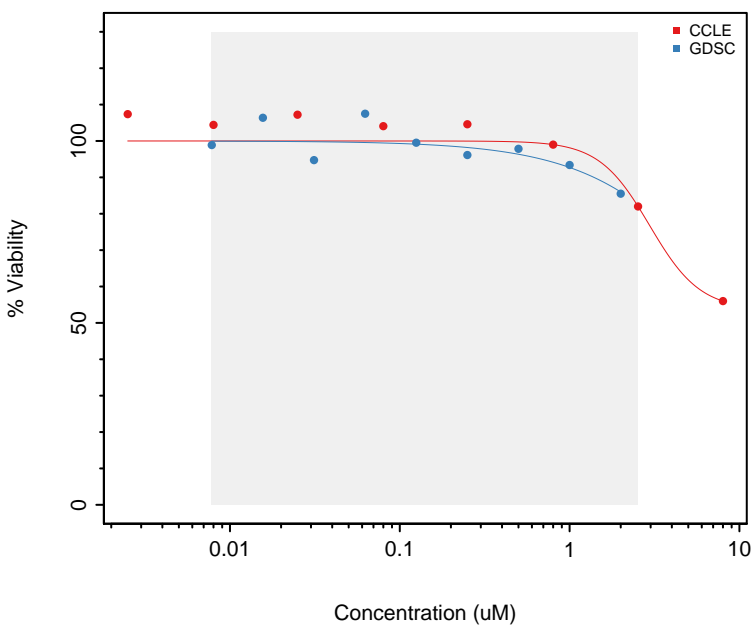

Nilotinib:COLO-320-HSR

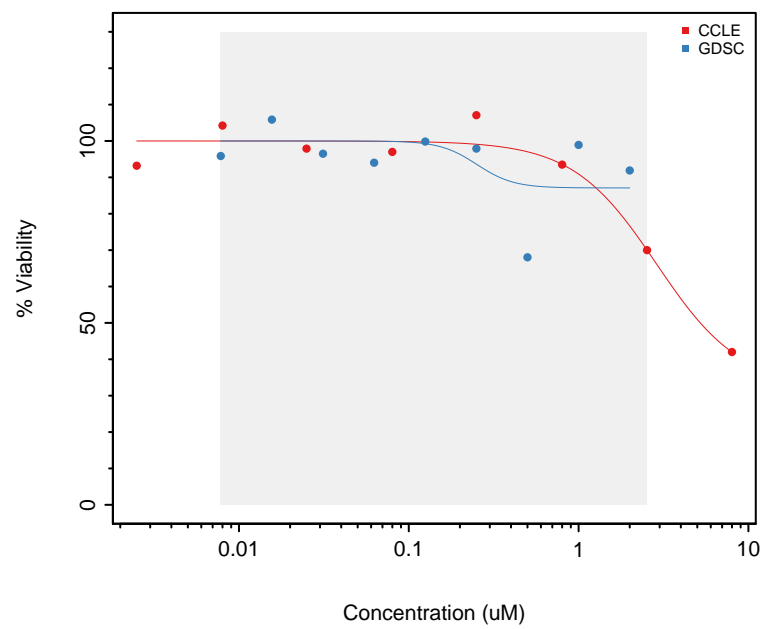

Nilotinib:COLO-679

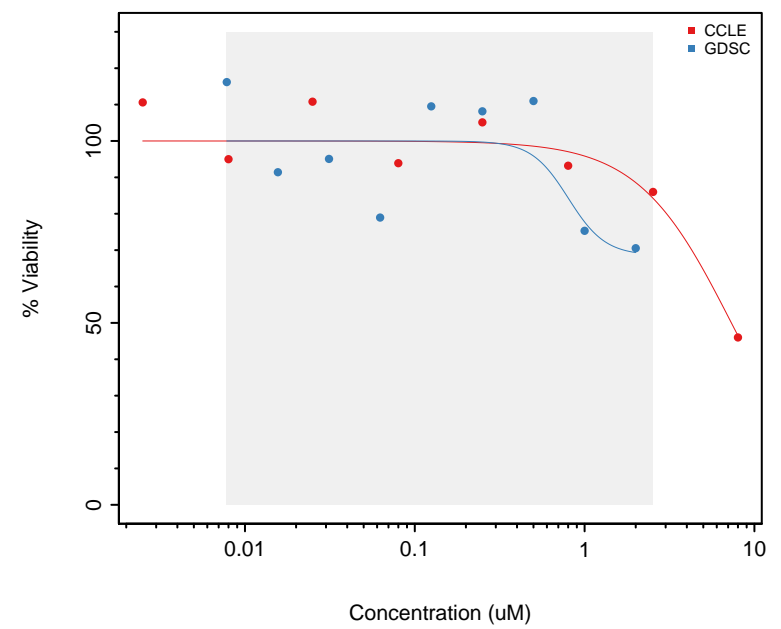

Nilotinib:COR-L23

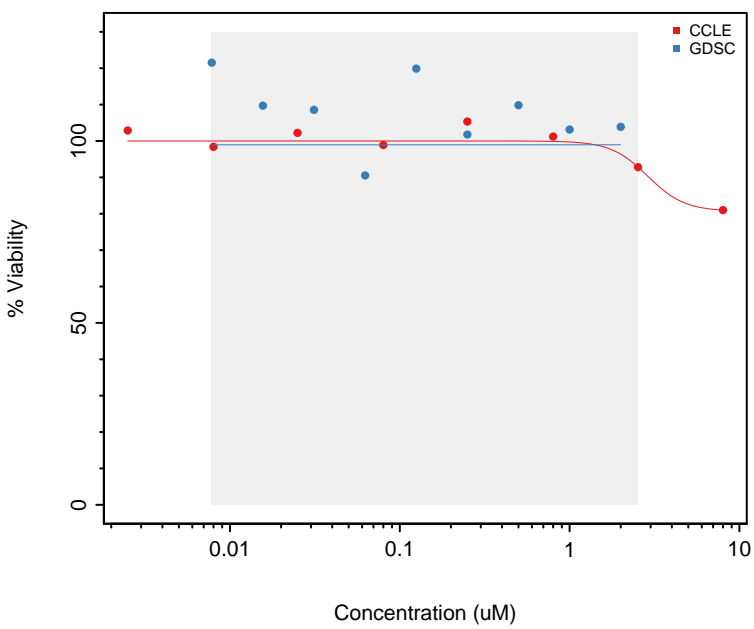

Nilotinib:Daoy

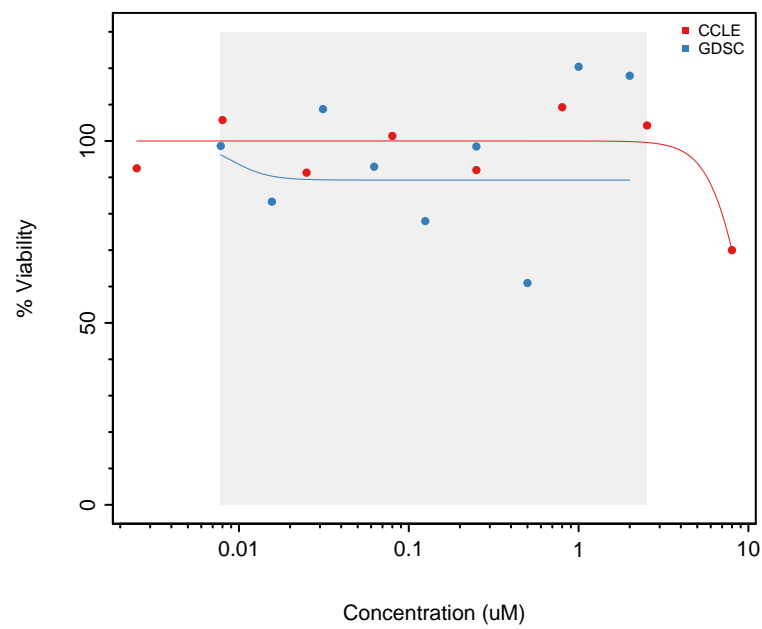

Nilotinib:DBTRG-05MG

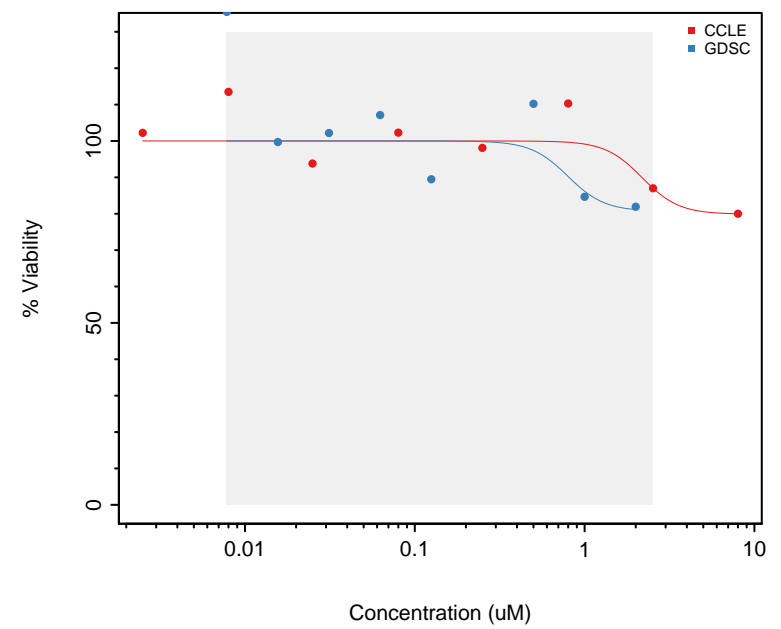









Nilotinib:KNS-81-FD

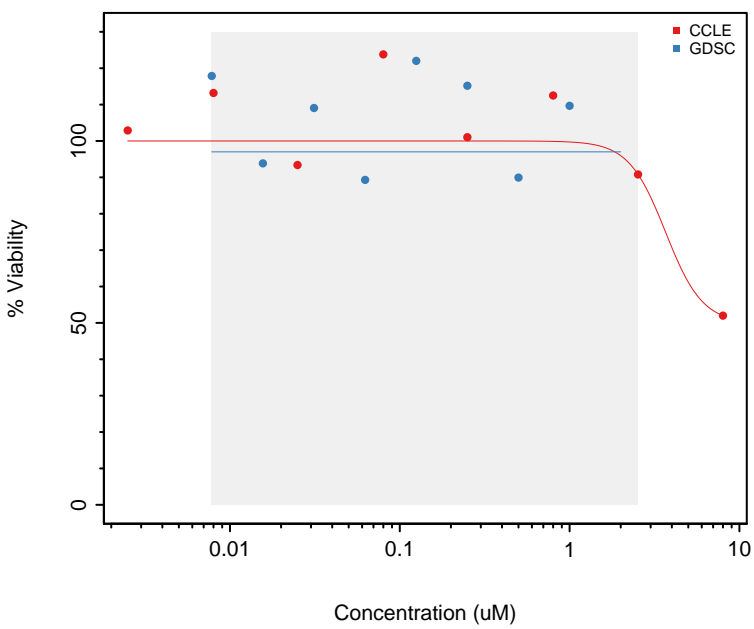

Nilotinib:KU812

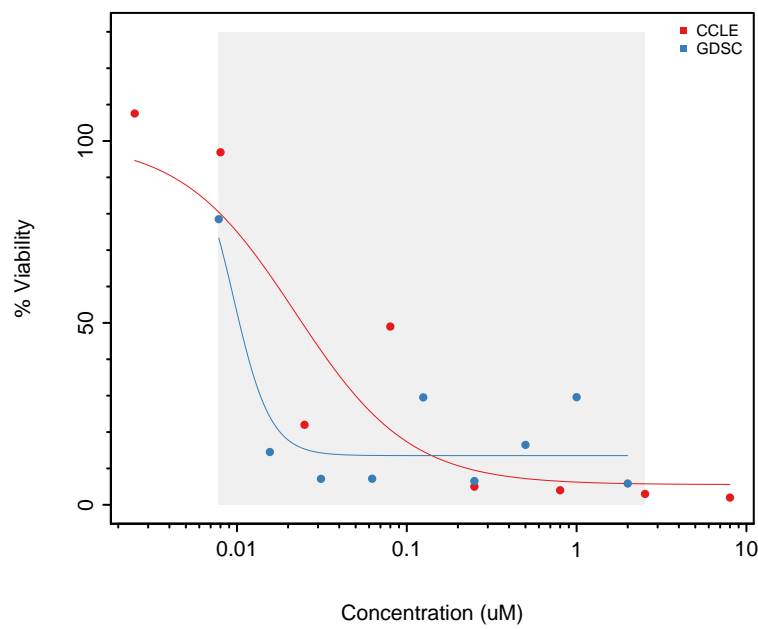

Nilotinib:KURAMOCHI

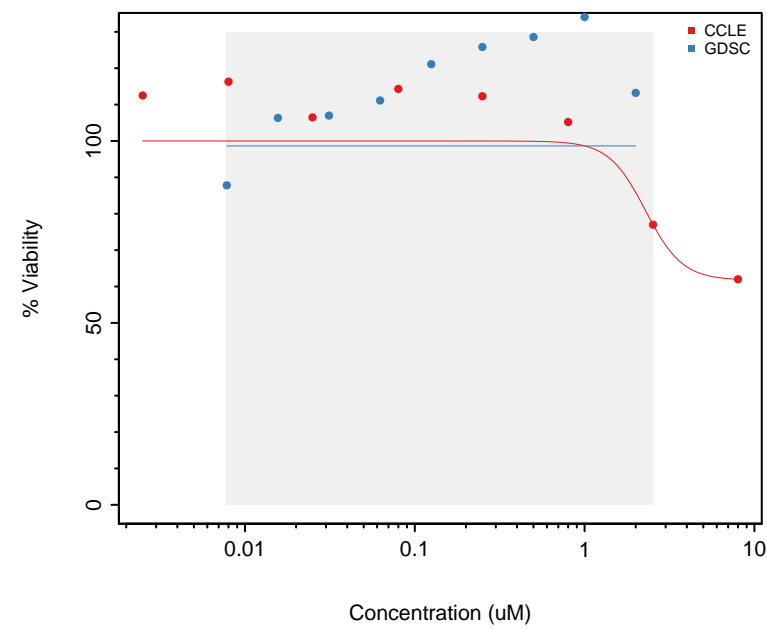

Nilotinib:KYSE-410

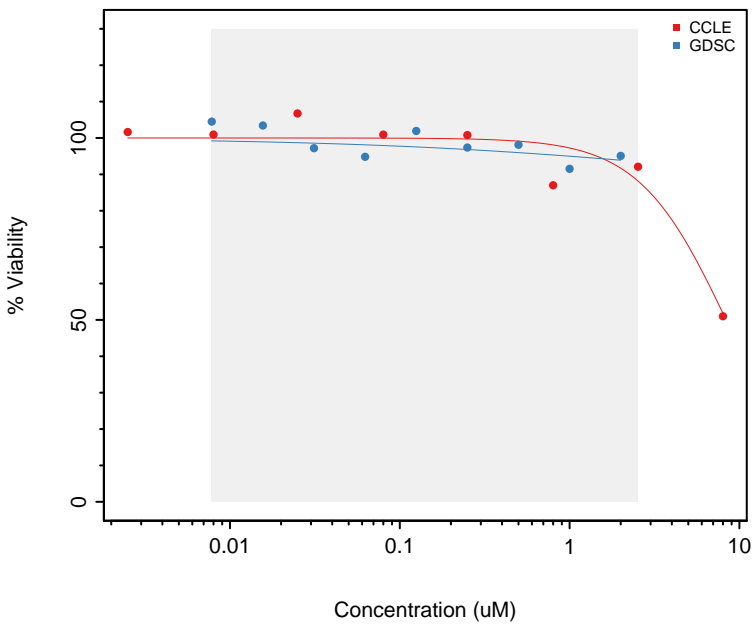

Nilotinib:KYSE-520

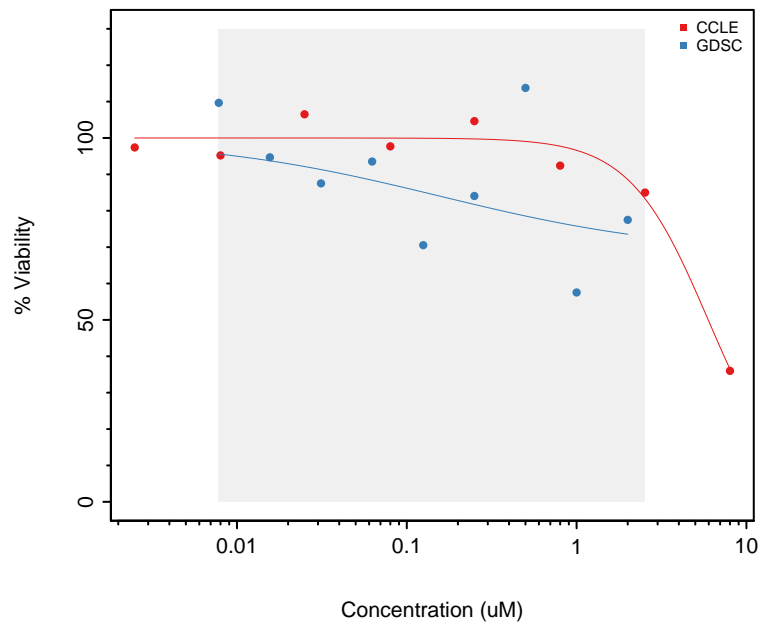

Nilotinib:L-363

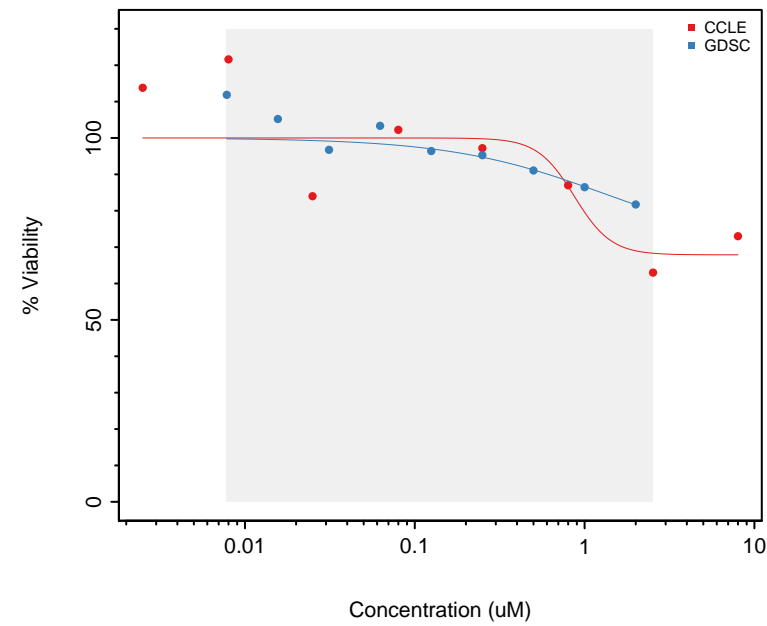

Nilotinib:L-428

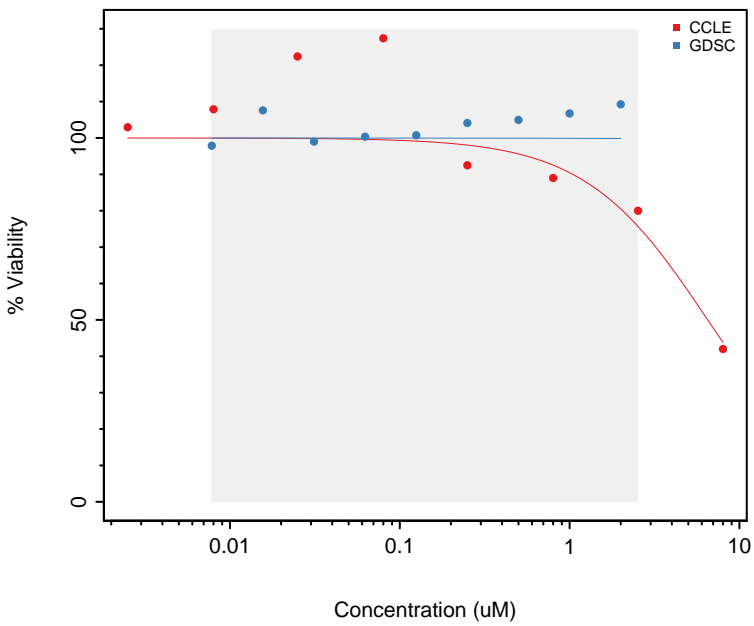

Nilotinib:LCLC-103H

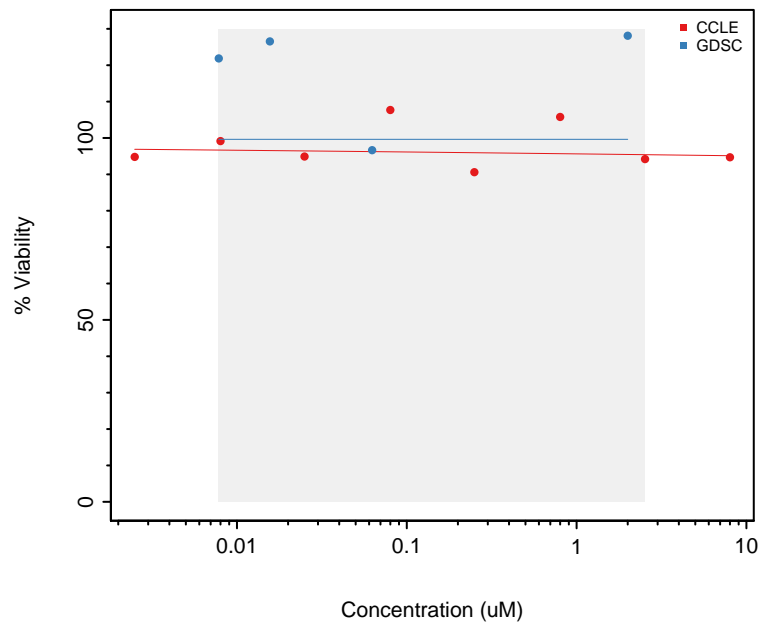

Nilotinib:LP-1

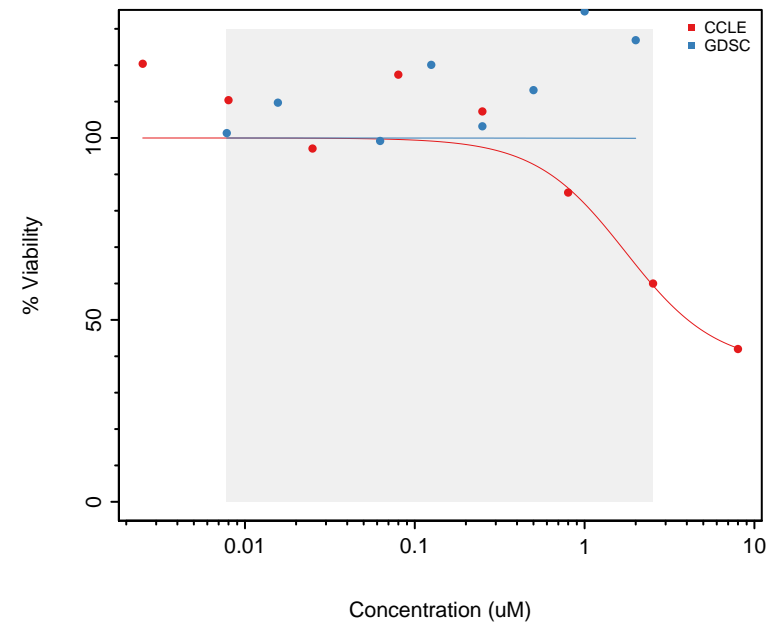

Nilotinib:LS-123

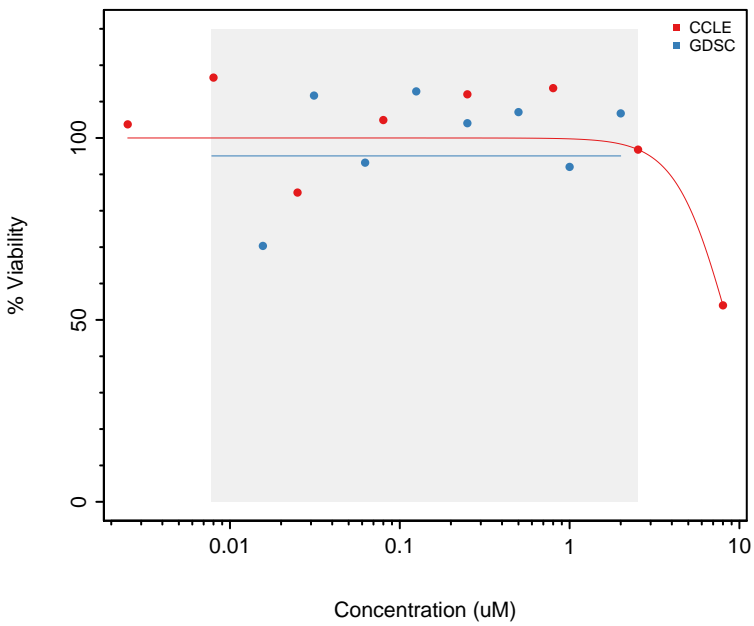

Nilotinib:LS-513

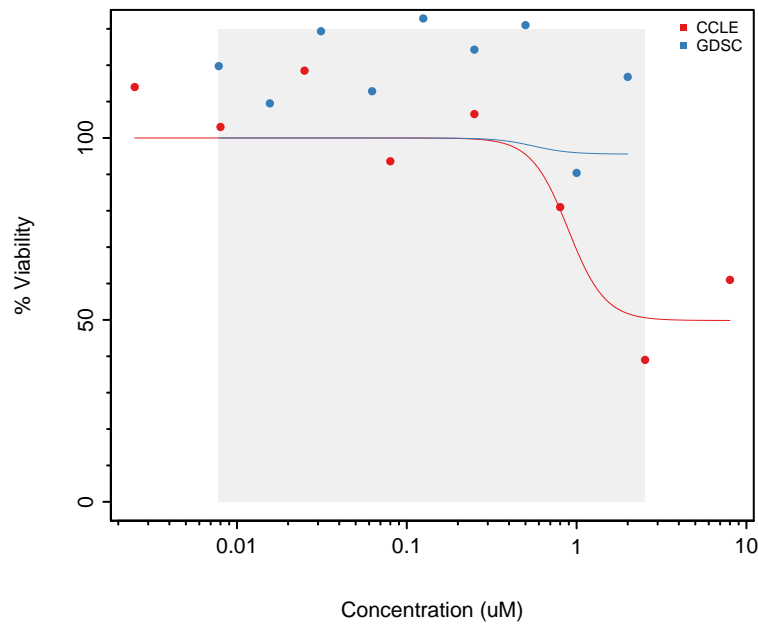

Nilotinib:LU-99A

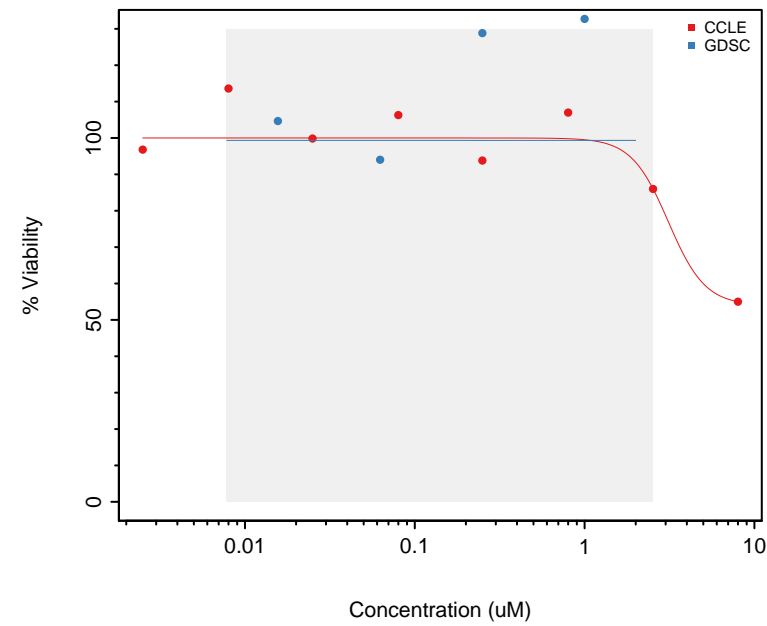













Nilotinib:Panc 03.27

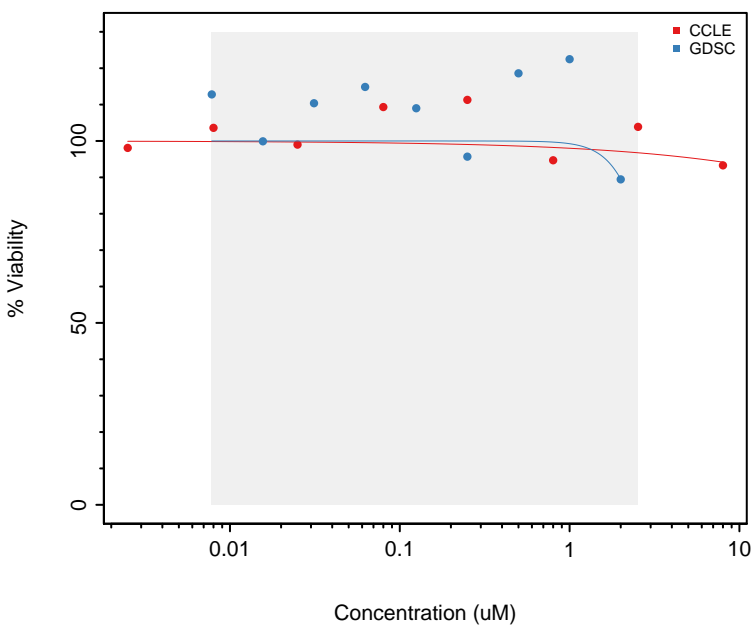

Nilotinib:Panc 10.05

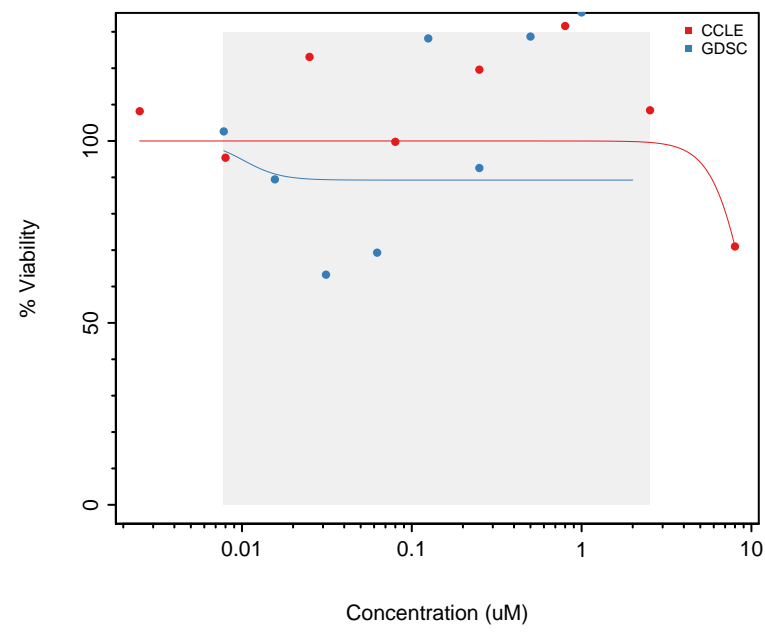

Nilotinib:Raji

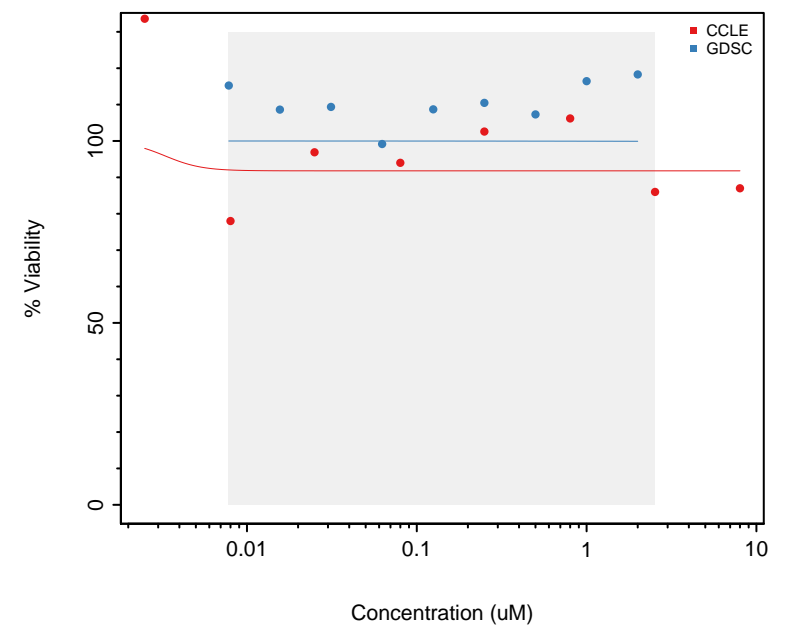

Nilotinib:REH

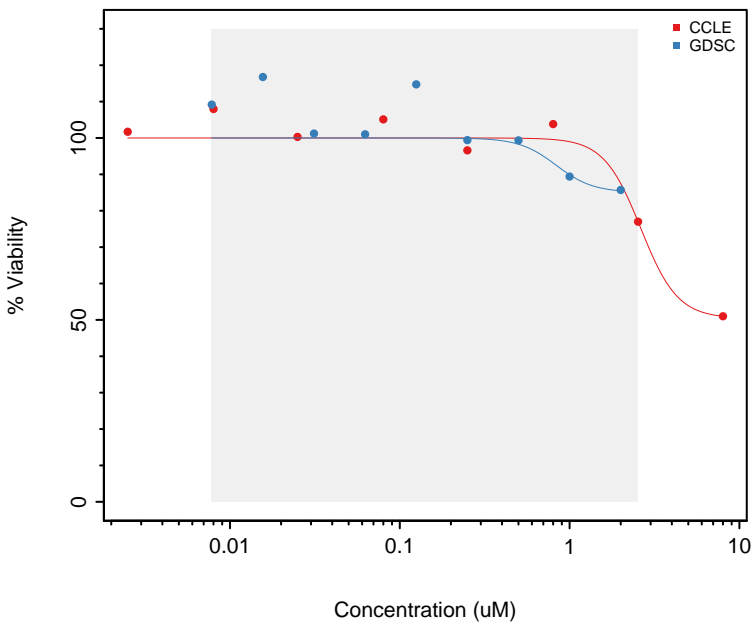

Nilotinib:RERF-LC-MS

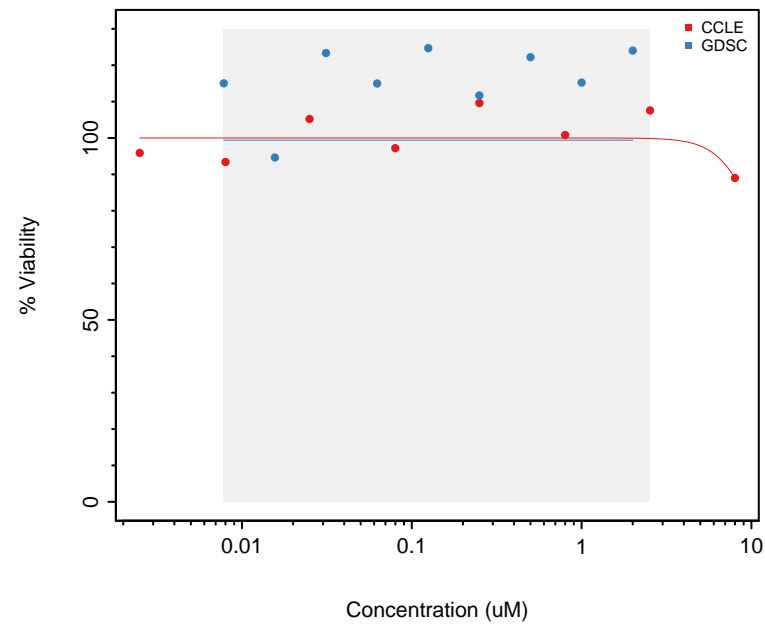

Nilotinib:RKO

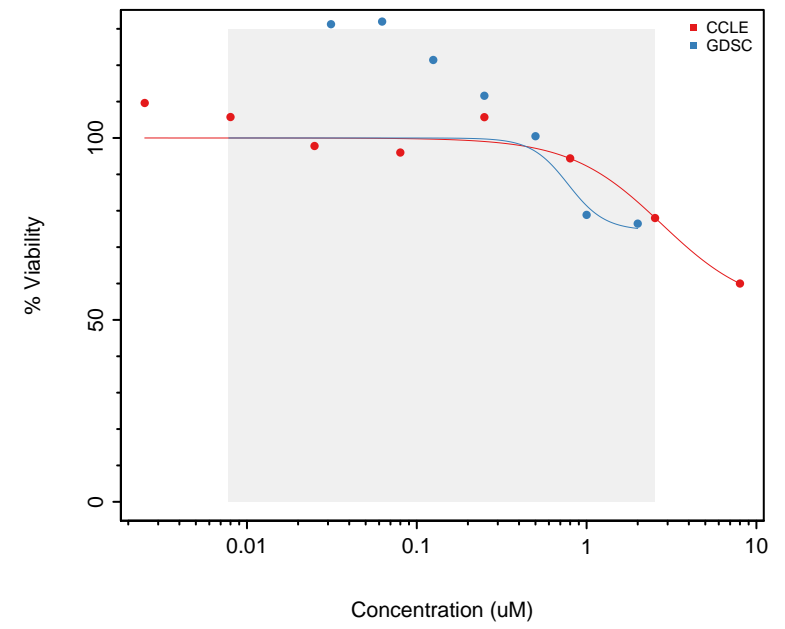

Nilotinib:RL95-2

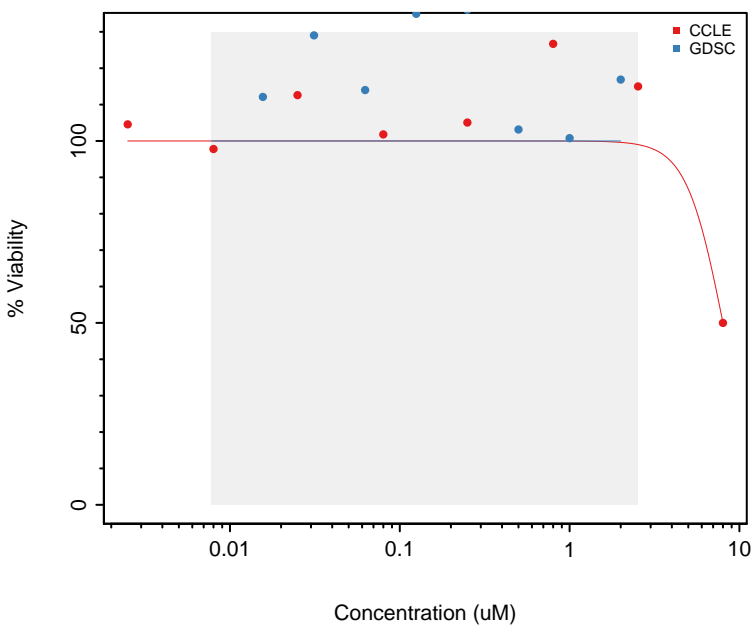

Nilotinib:RPMI-8402

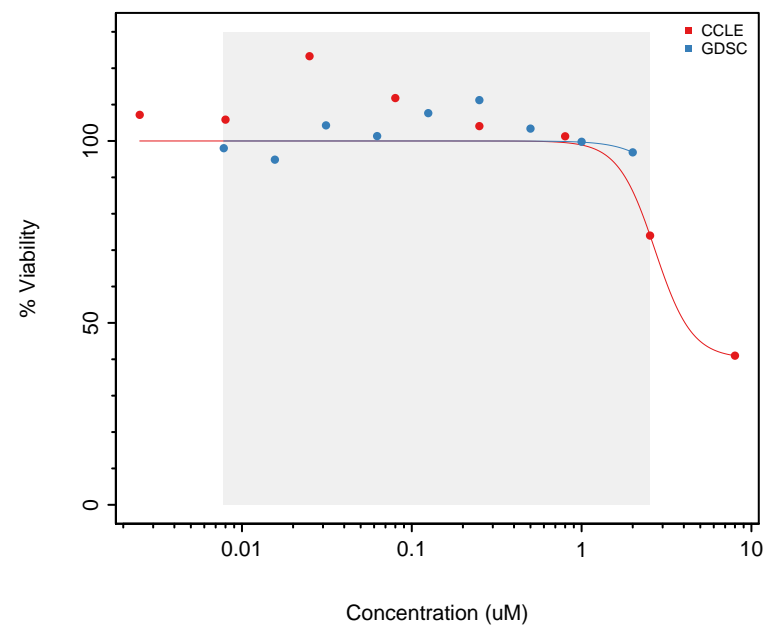

Nilotinib:RT-112

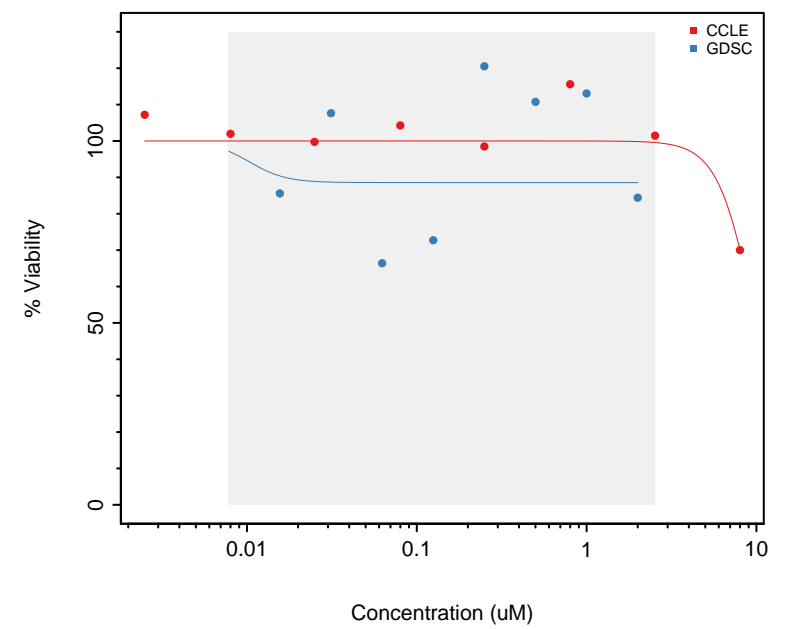

Nilotinib:RT4

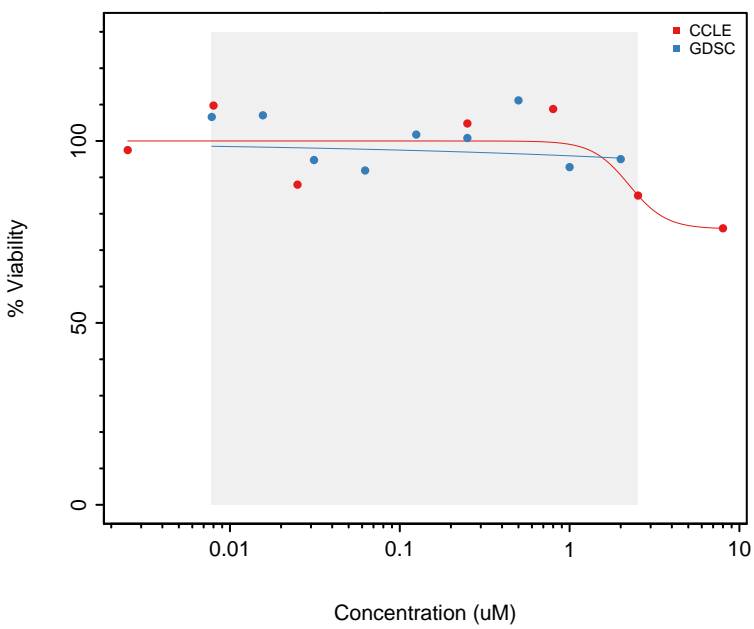

Nilotinib:RVH-421

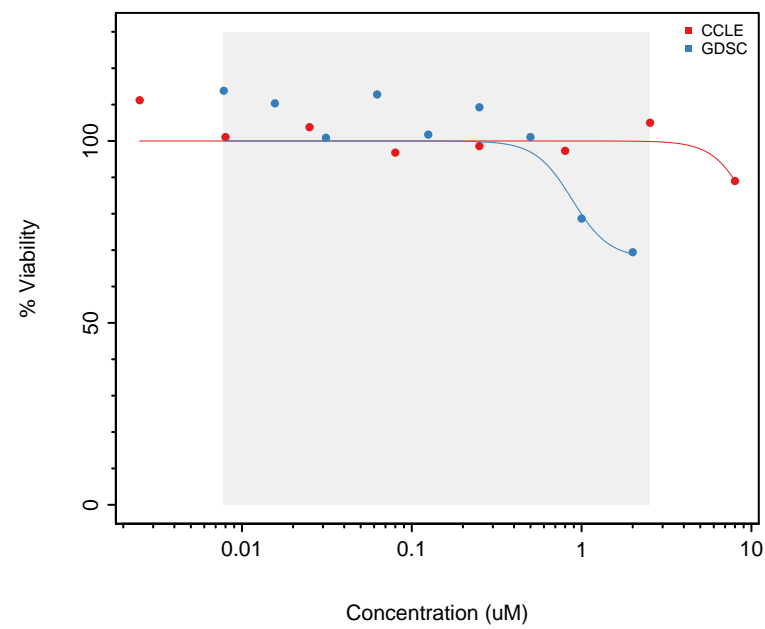

Nilotinib:Saos-2

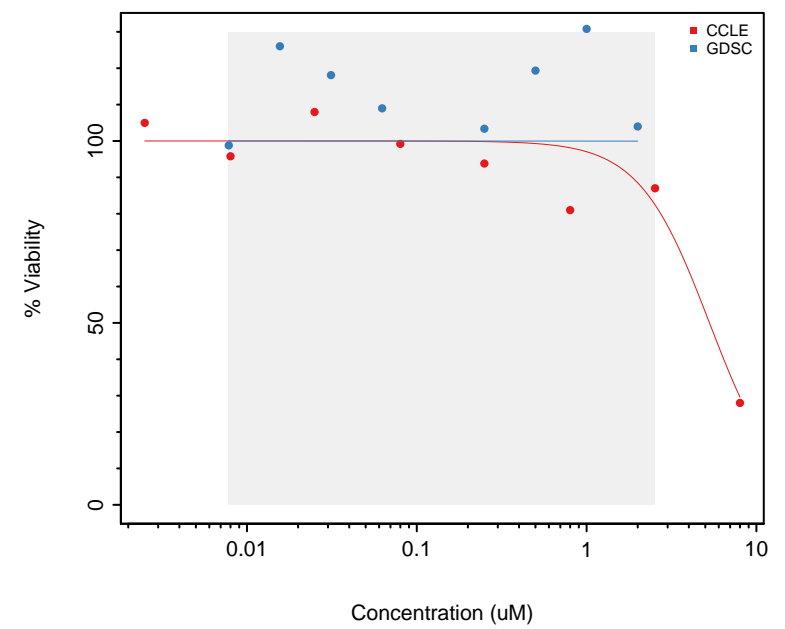











17-AAG:A549

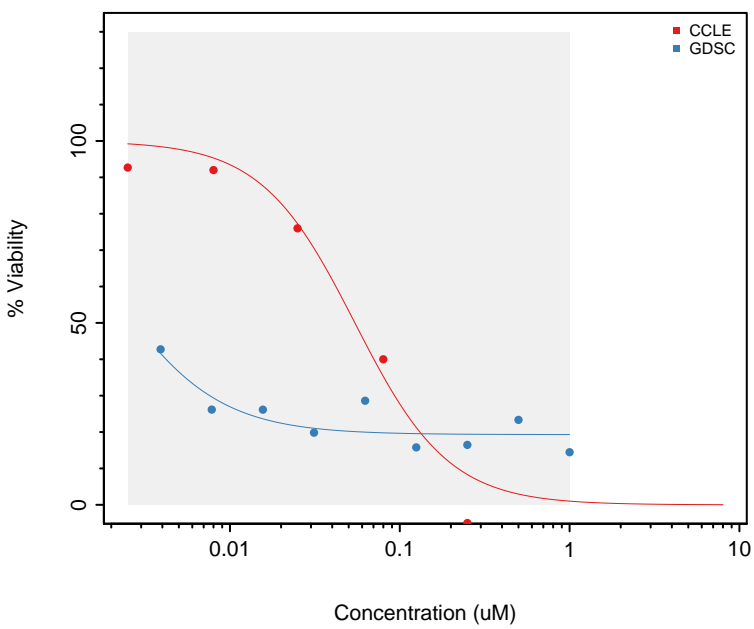

17-AAG:A673

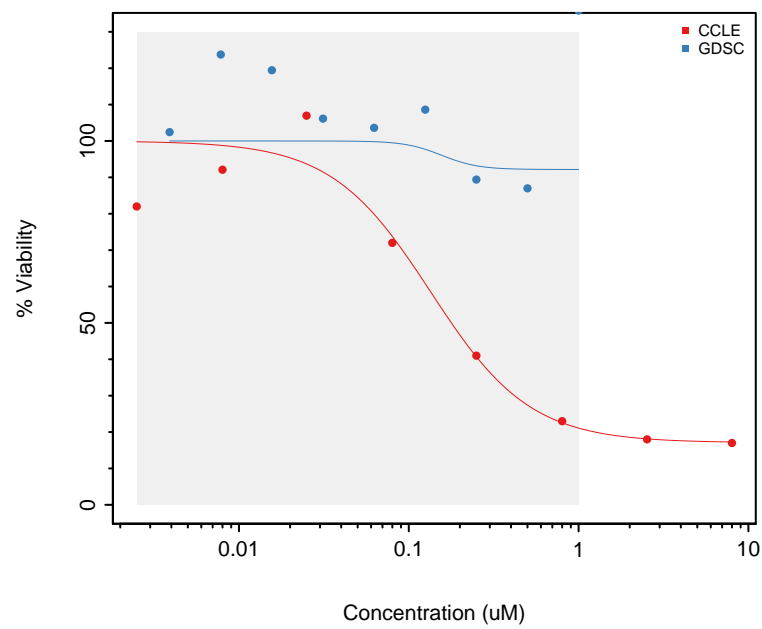

17-AAG:ACHN

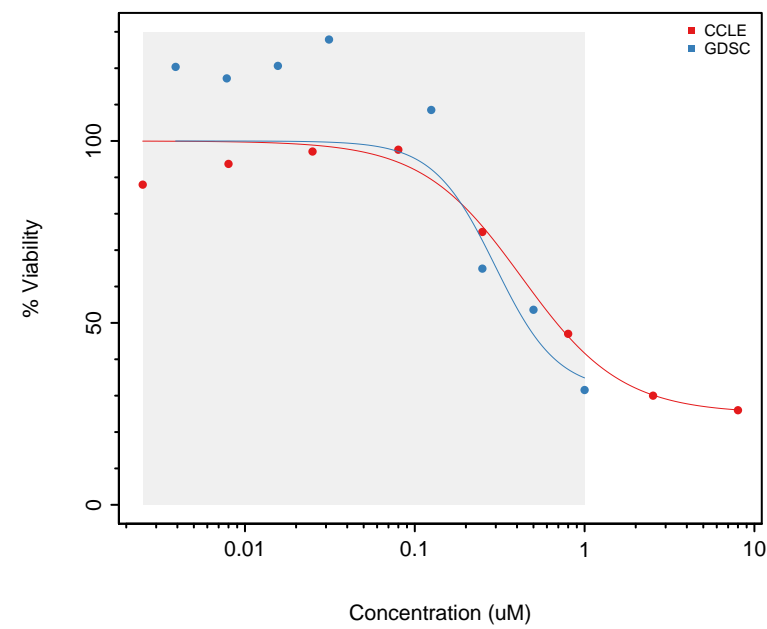

17-AAG:AN3-CA

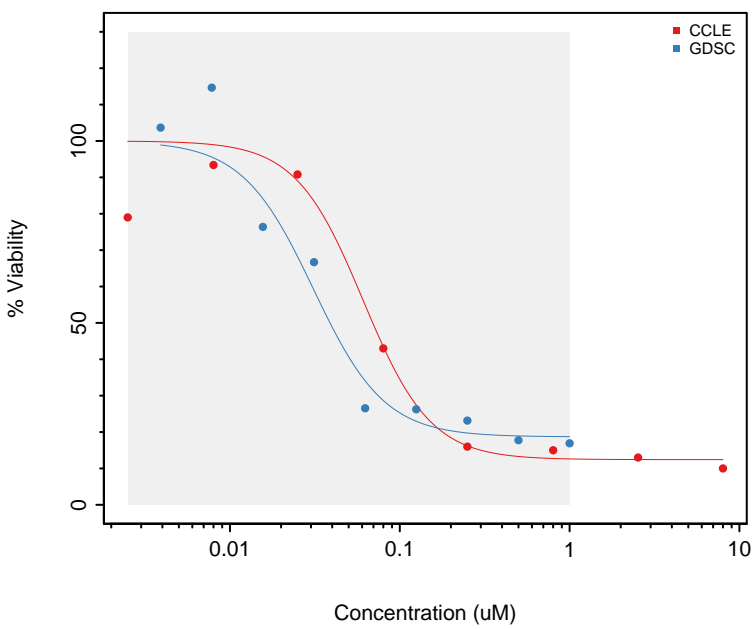

17-AAG:AsPC-1

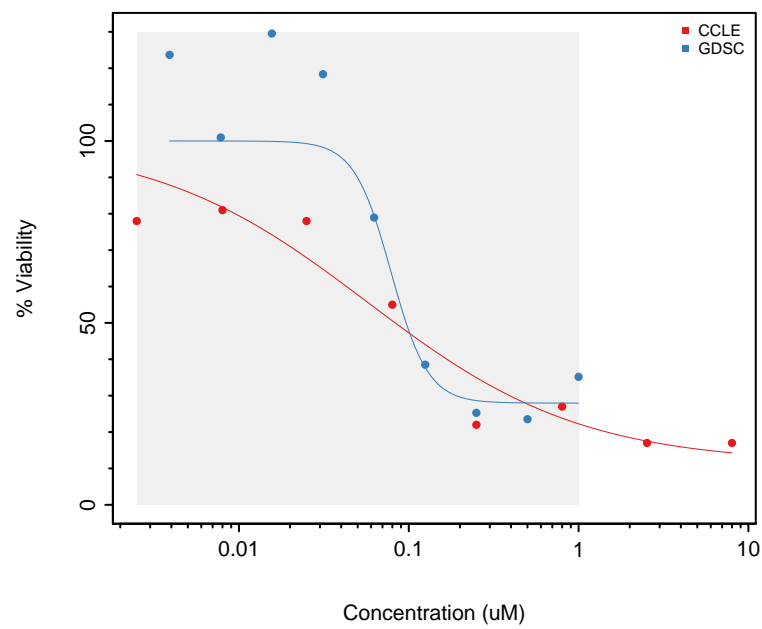

17-AAG:AU565

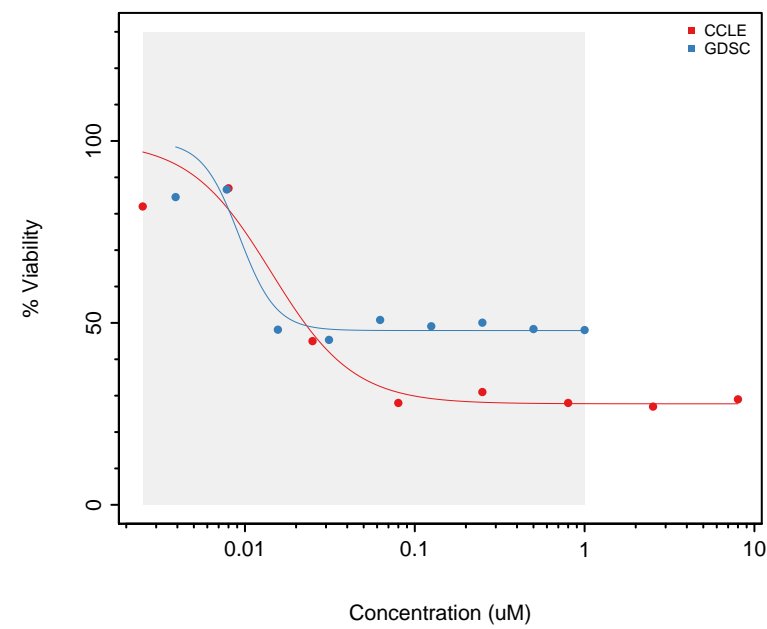

17-AAG:BCPAP

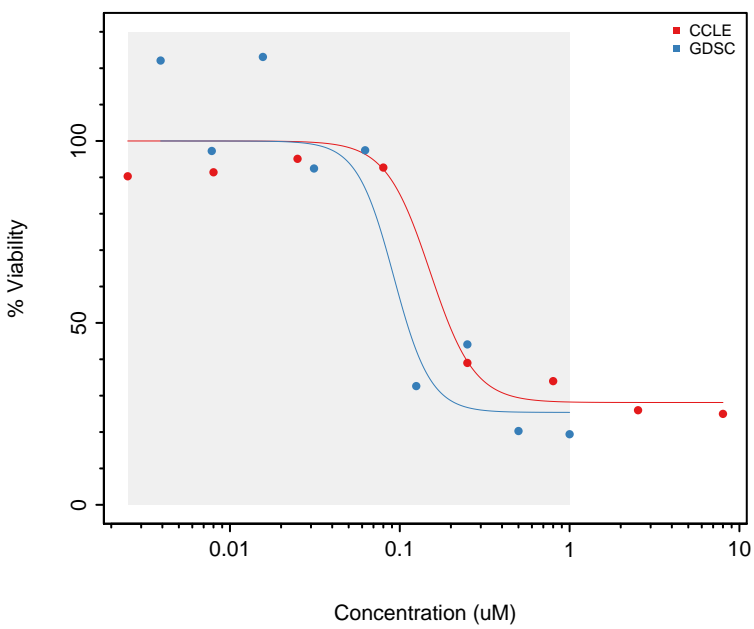

17-AAG:BTFC-909

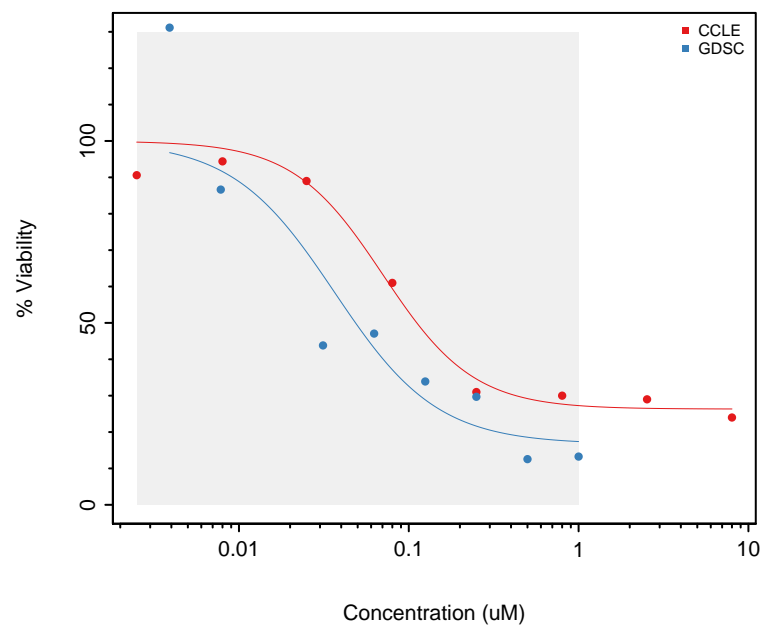

17-AAG:BL-41

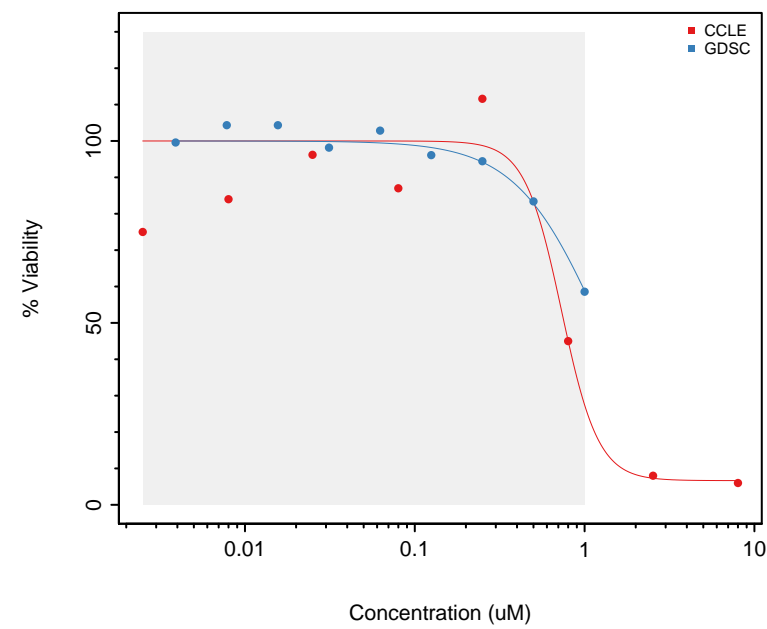

17-AAG:BT-20

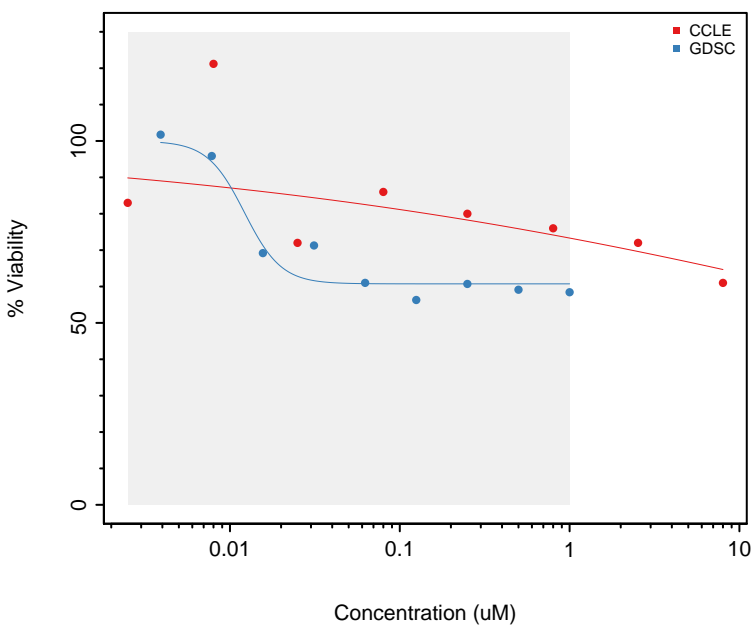

17-AAG:BT-474

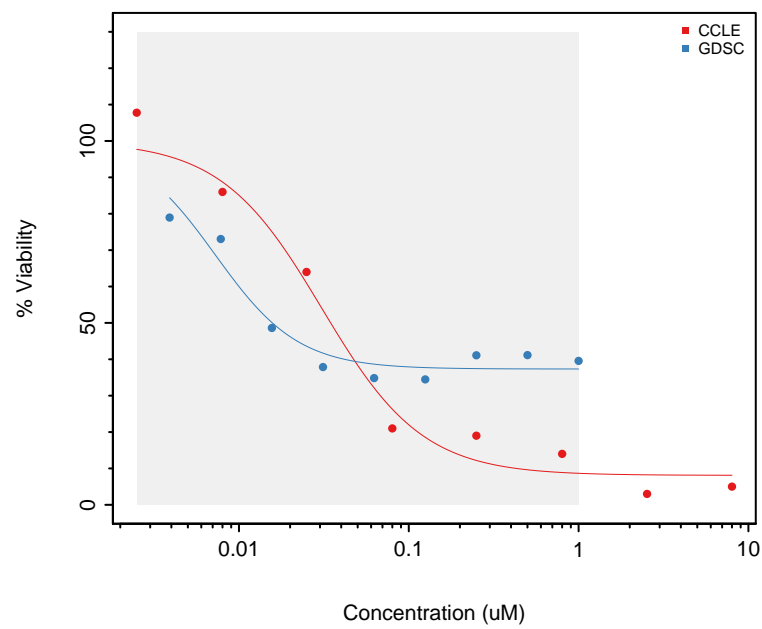

17-AAG:BT-549

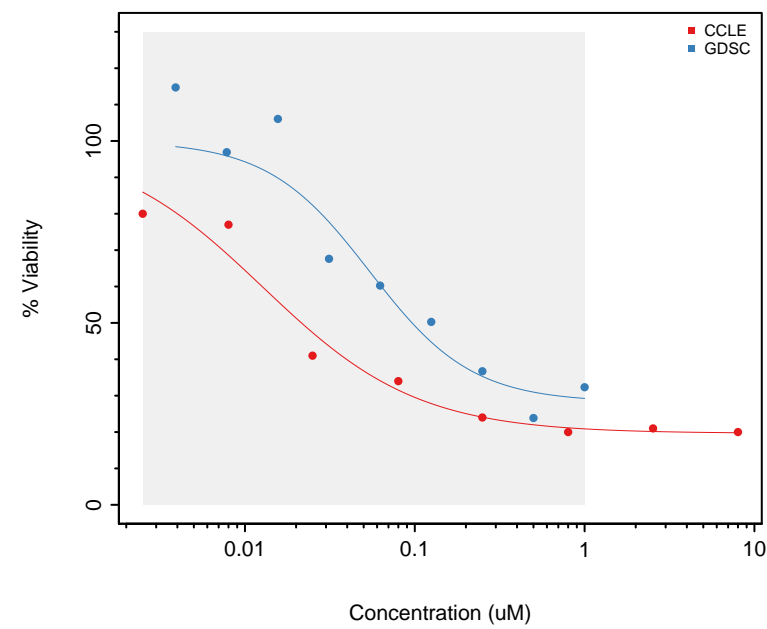

17-AAG:BxPC-3

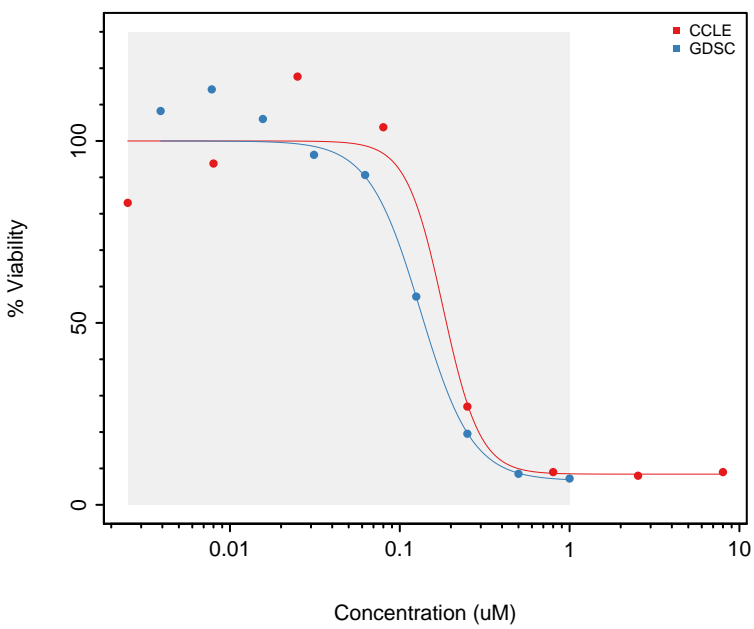

17-AAG:C2BBe1

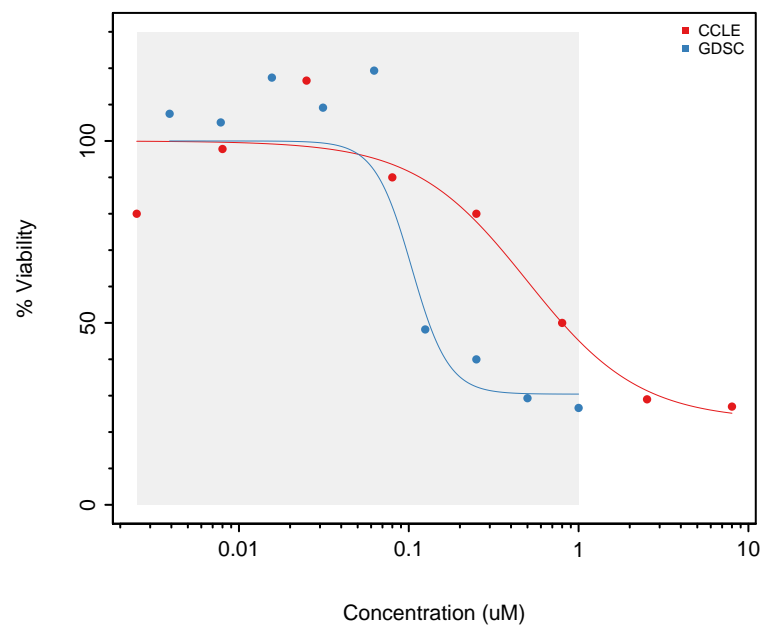

17-AAG:C32

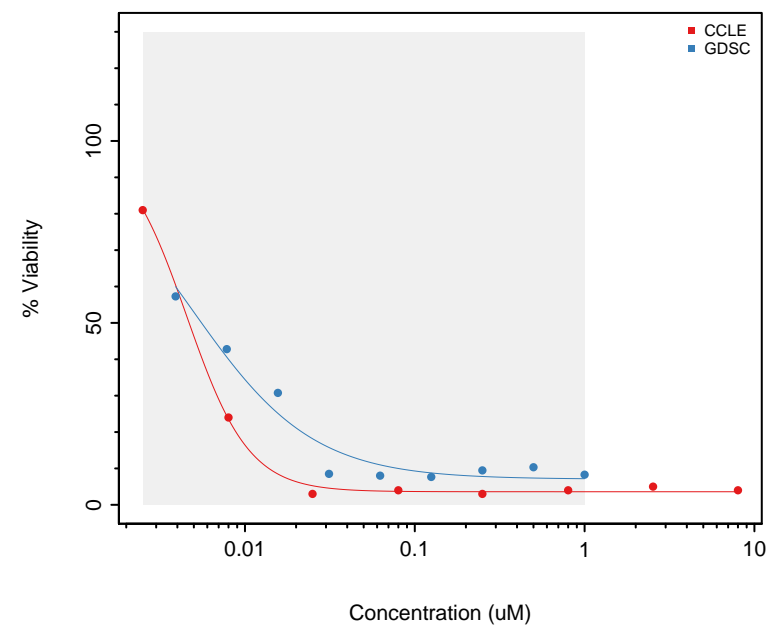

17-AAG:C3A

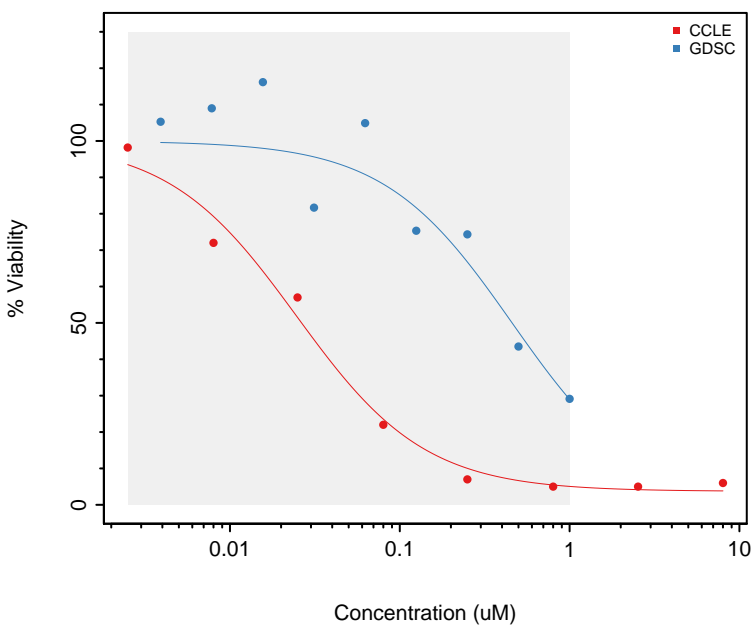

17-AAG:CAL-12T

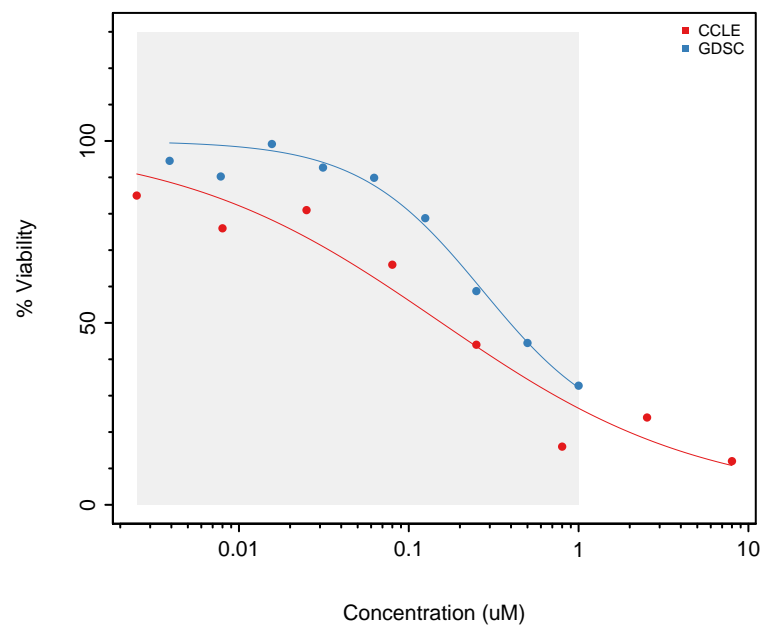

17-AAG:CAL-27

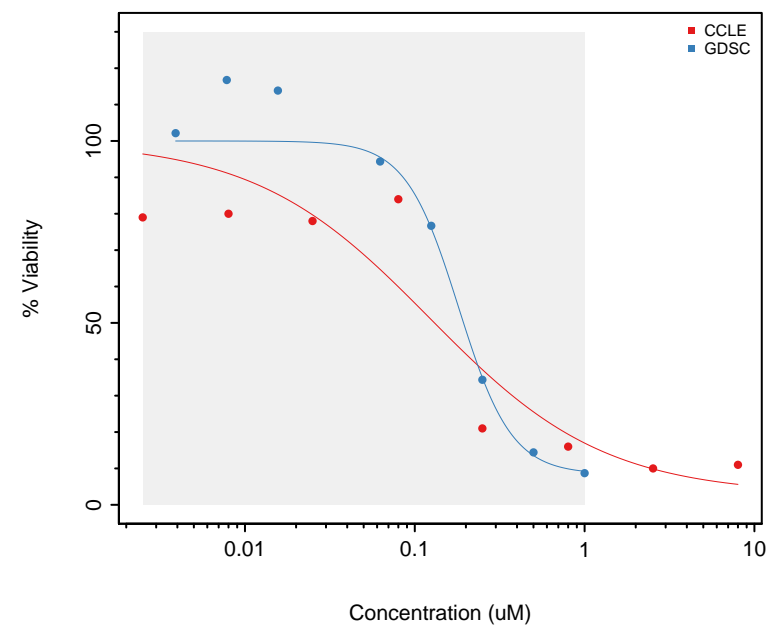

17-AAG:CAL-85-1

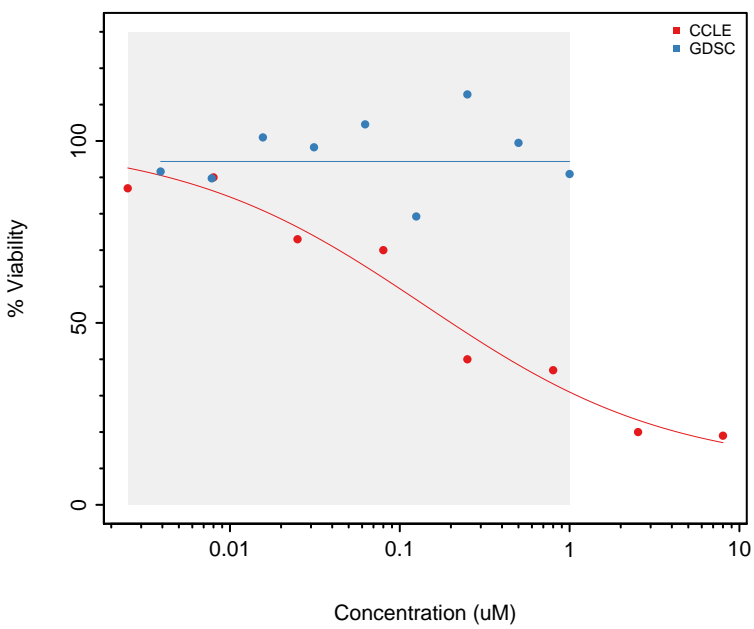

17-AAG:Calu-3

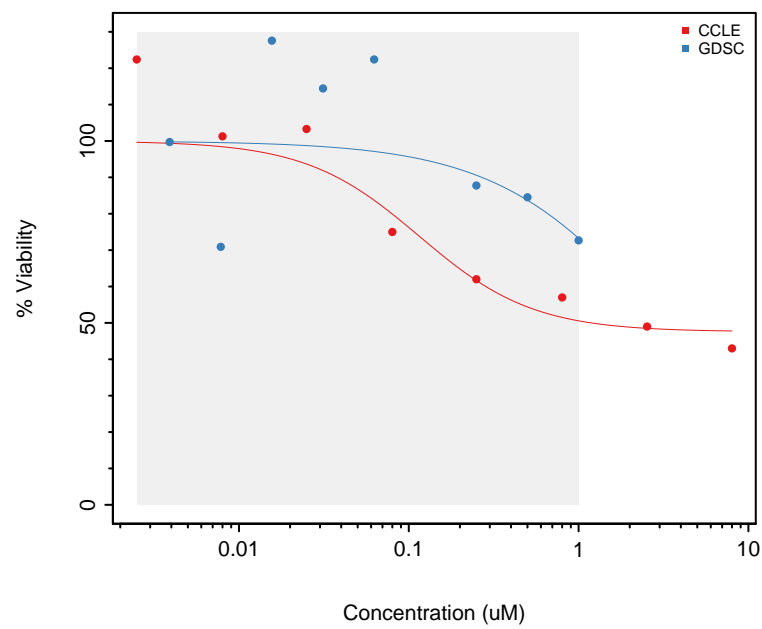

17-AAG:Calu-6

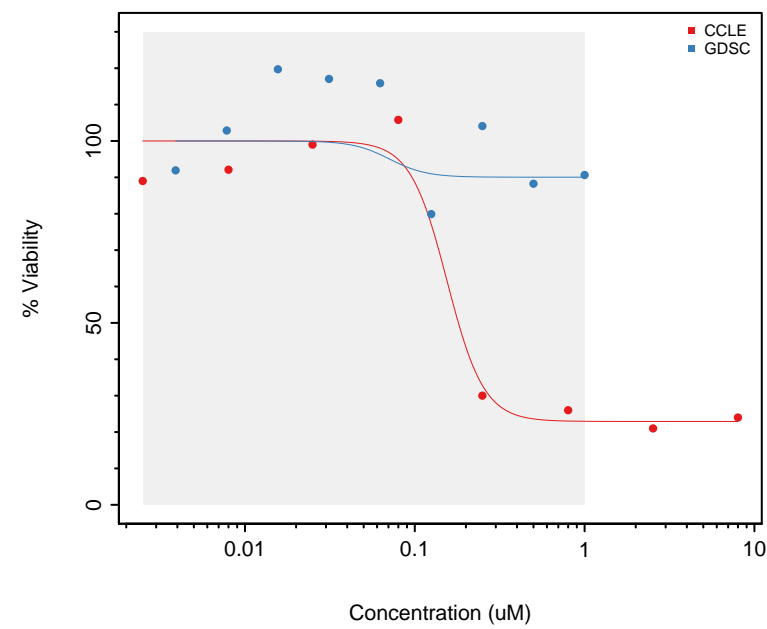

17-AAG:CAMA-1

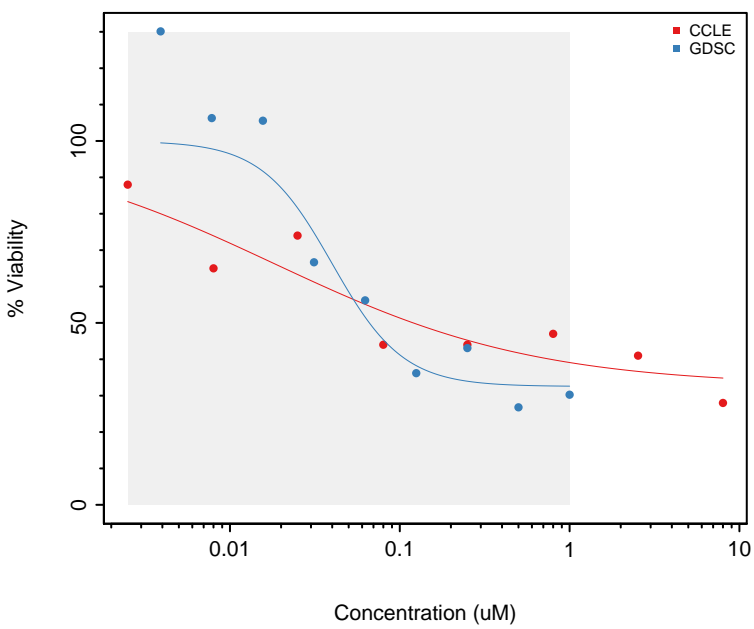

17-AAG:Capan-2

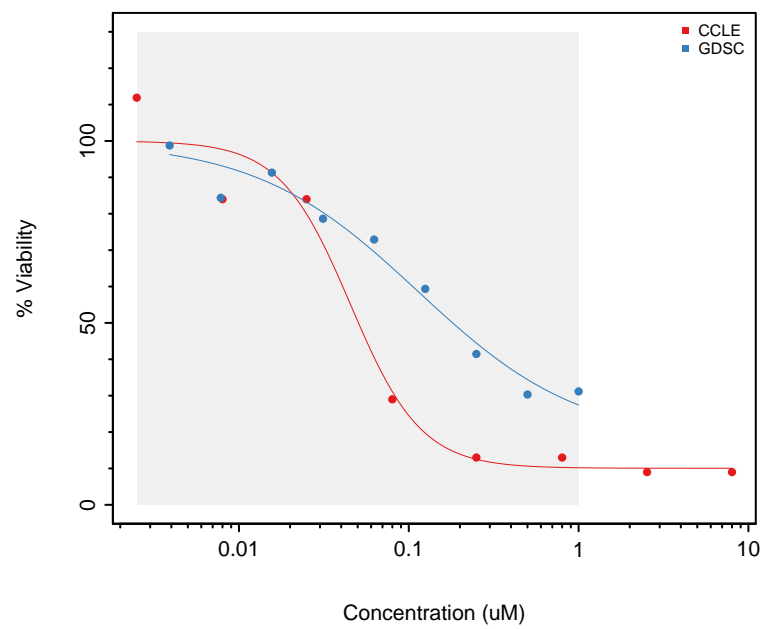

17-AAG:CAS-1

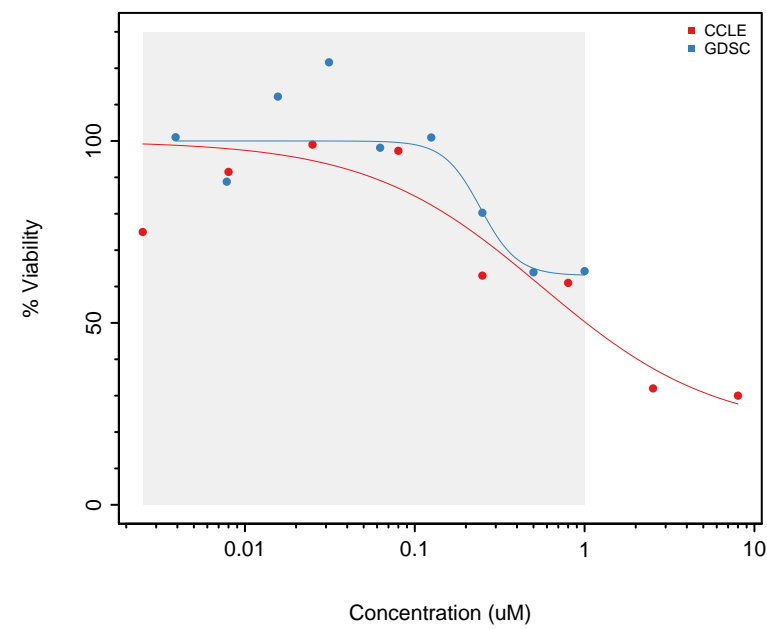

17-AAG:CHL-1

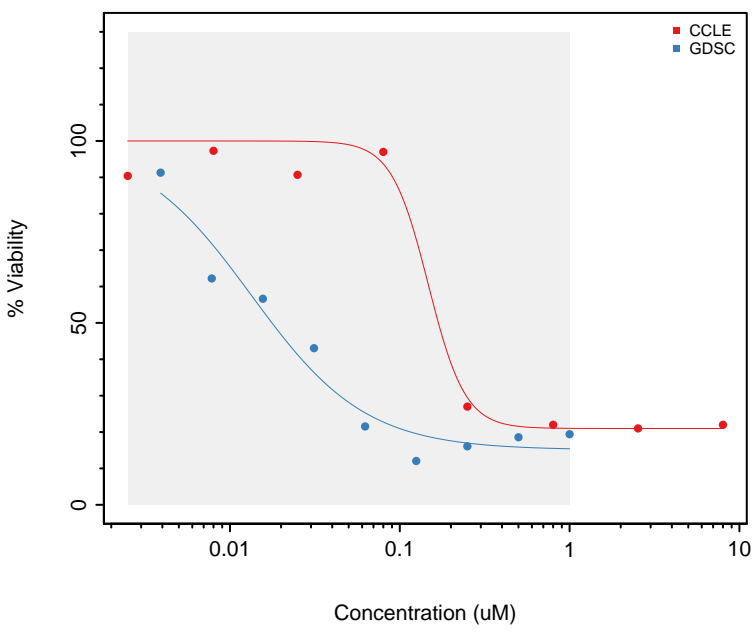

17-AAG:CHP-212

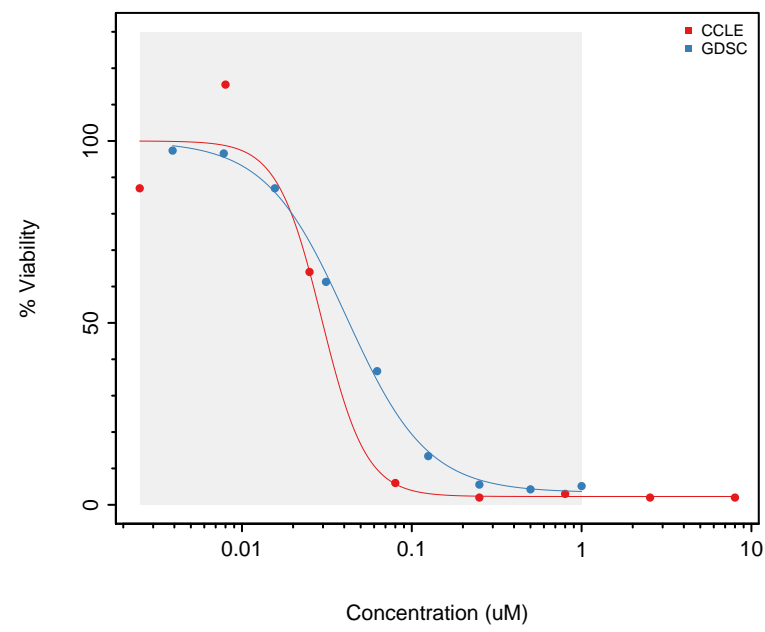

17-AAG:COLO-205

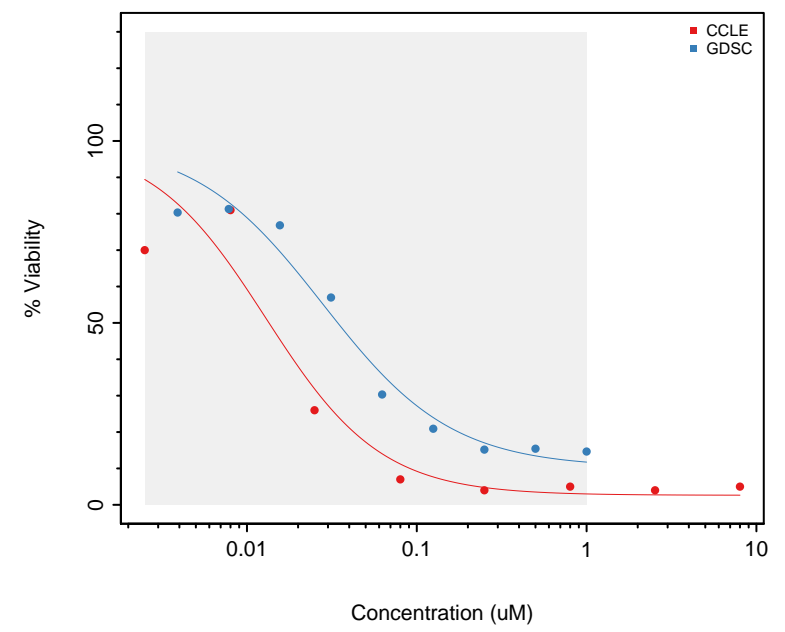

17-AAG:COLO-320-HSR

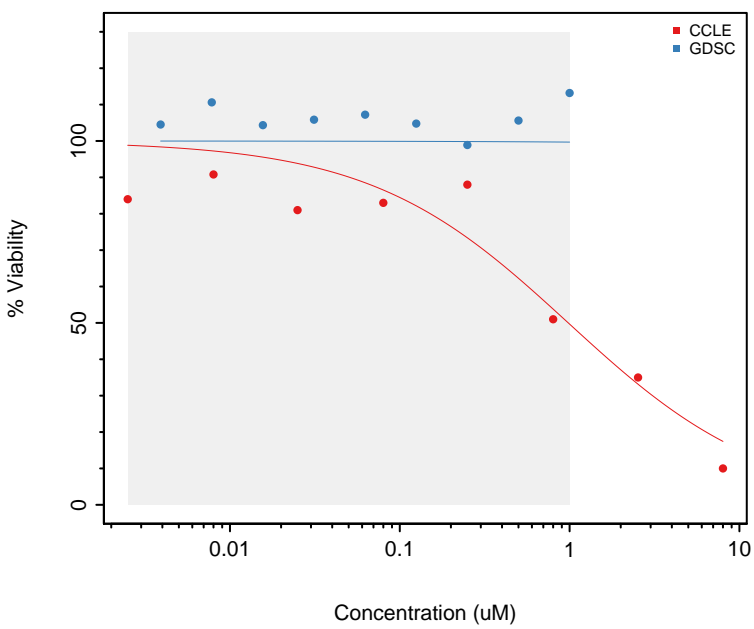

17-AAG:COLO-678

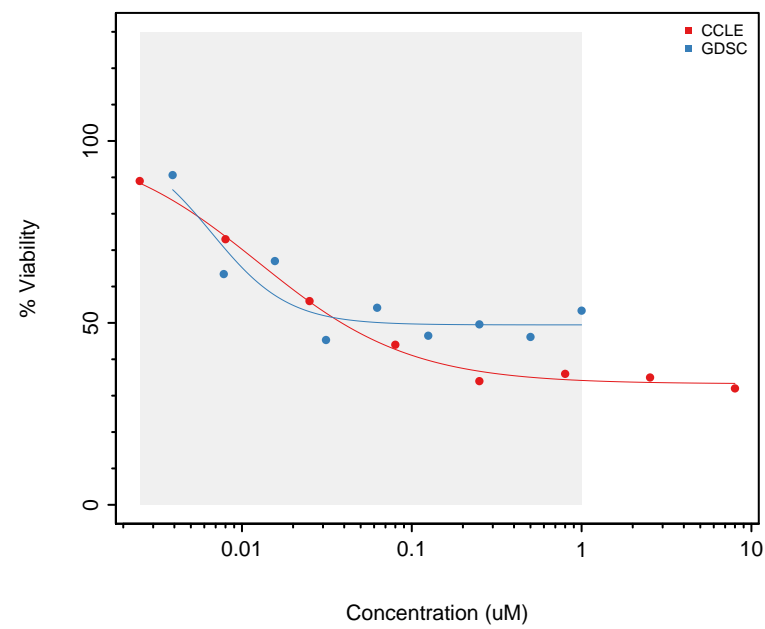

17-AAG:COLO-679

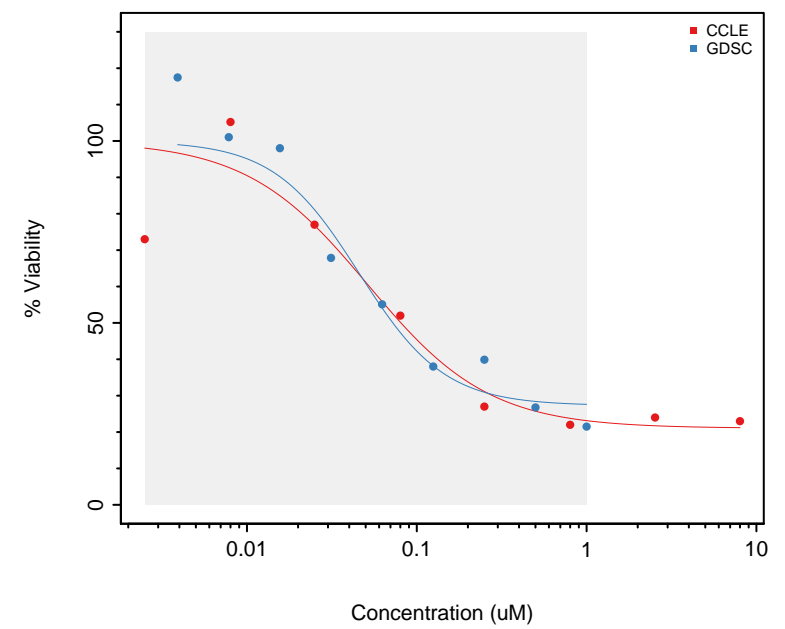

17-AAG:COLO-741

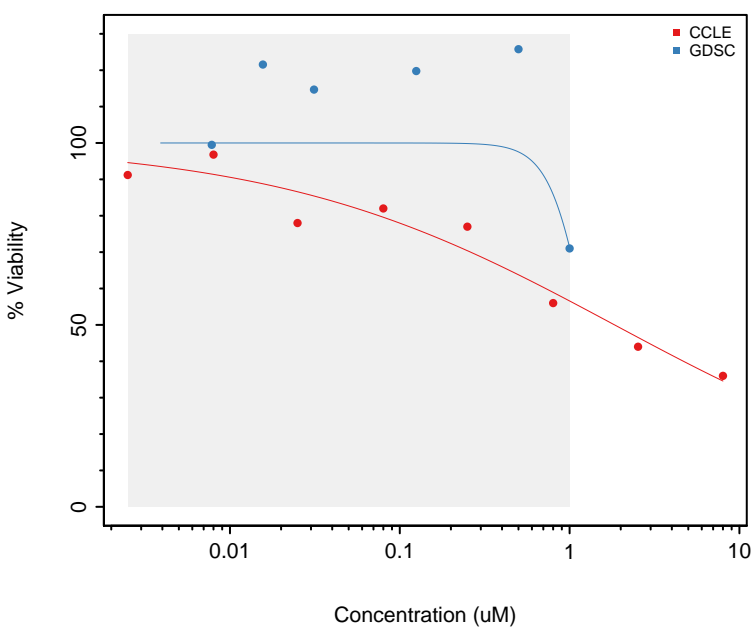

17-AAG:COR-L105

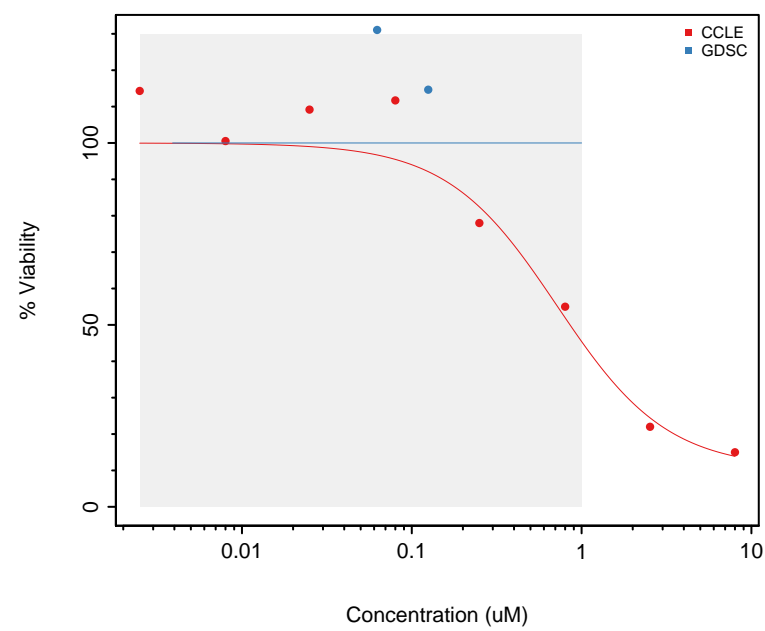

17-AAG:COR-L23

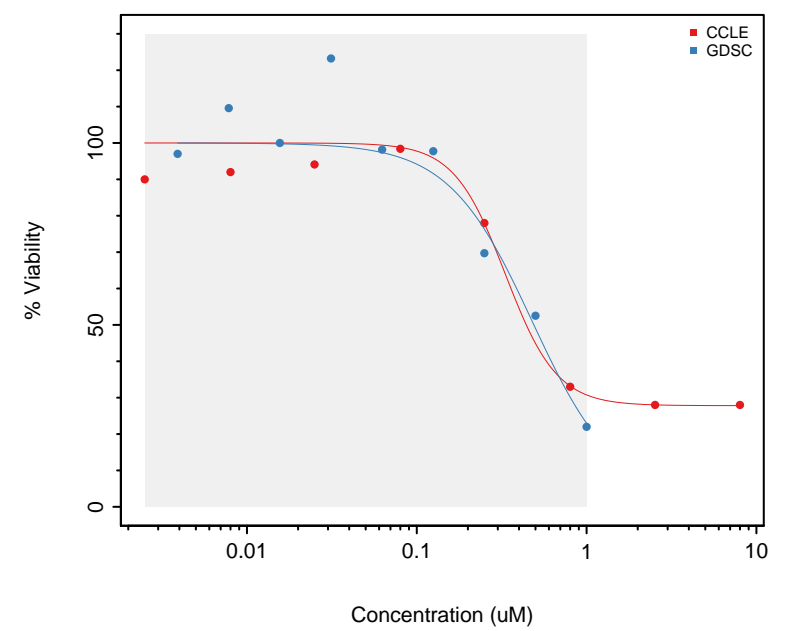

17-AAG:Daoy

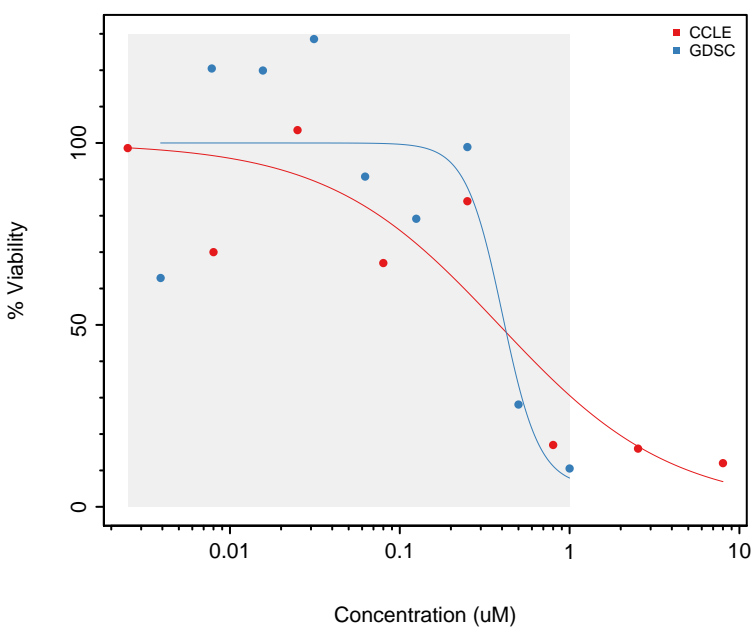

17-AAG:DBTRG-05MG

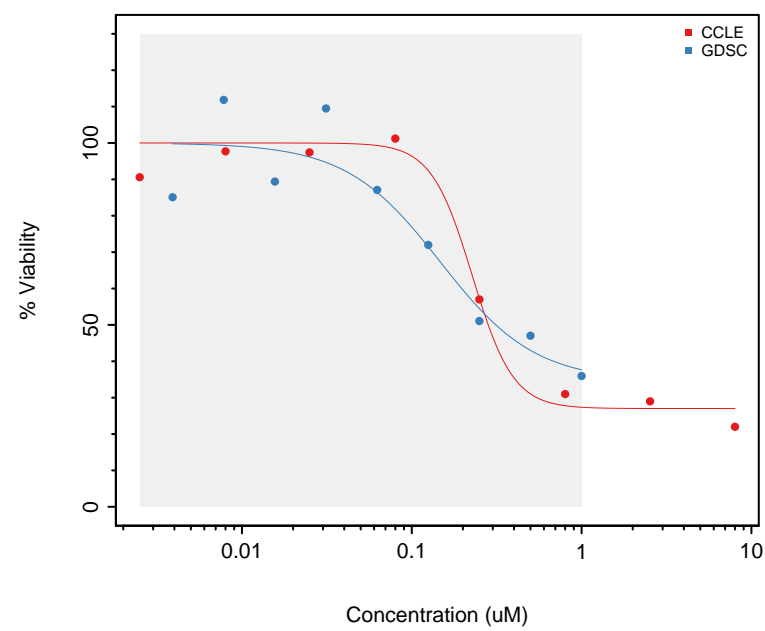

17-AAG:DEL

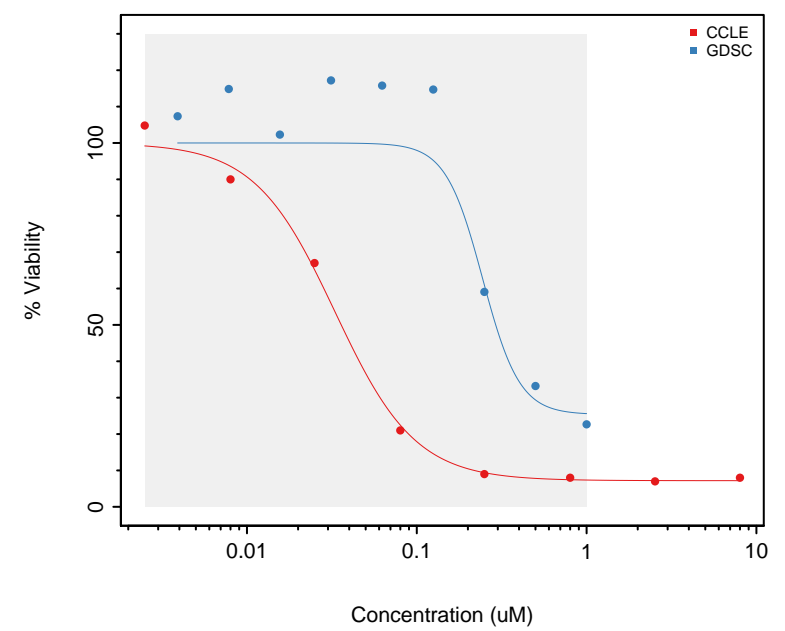





17-AAG:HCC1569

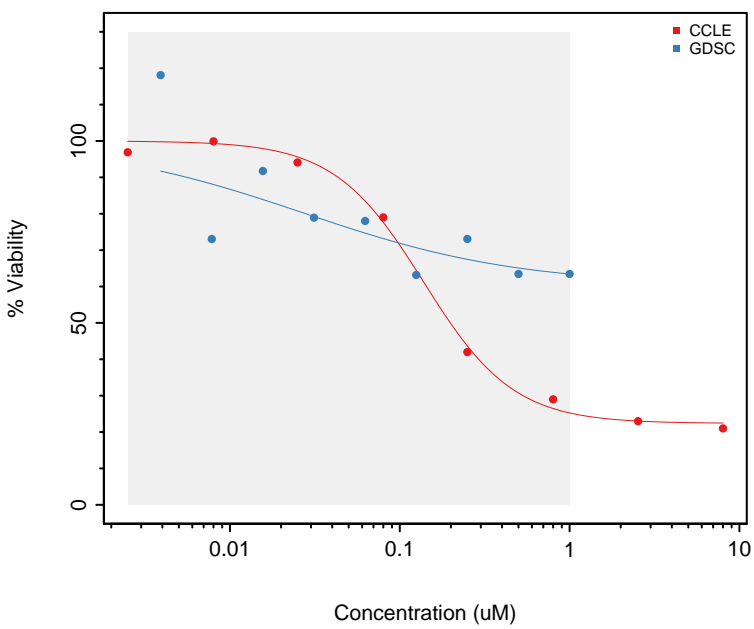

17-AAG:HCC1806

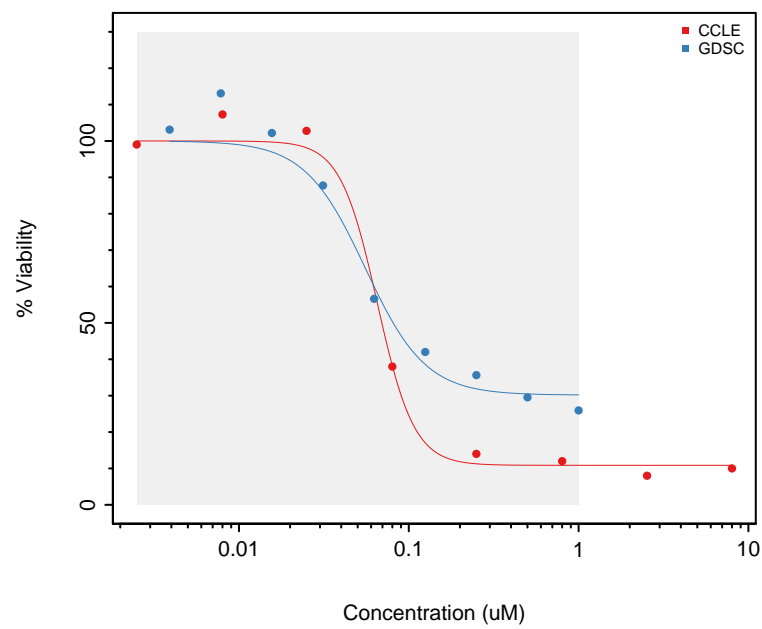

17-AAG:HCC1954

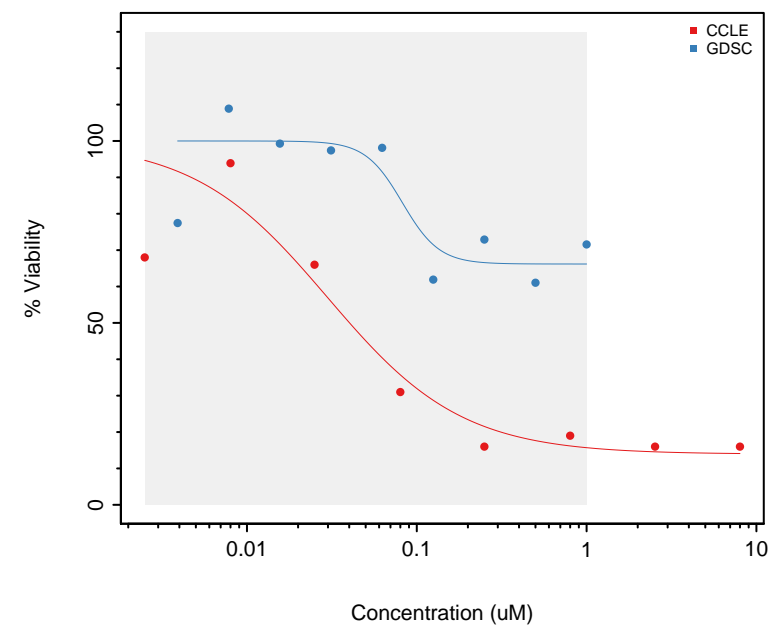

17-AAG:HCT-116

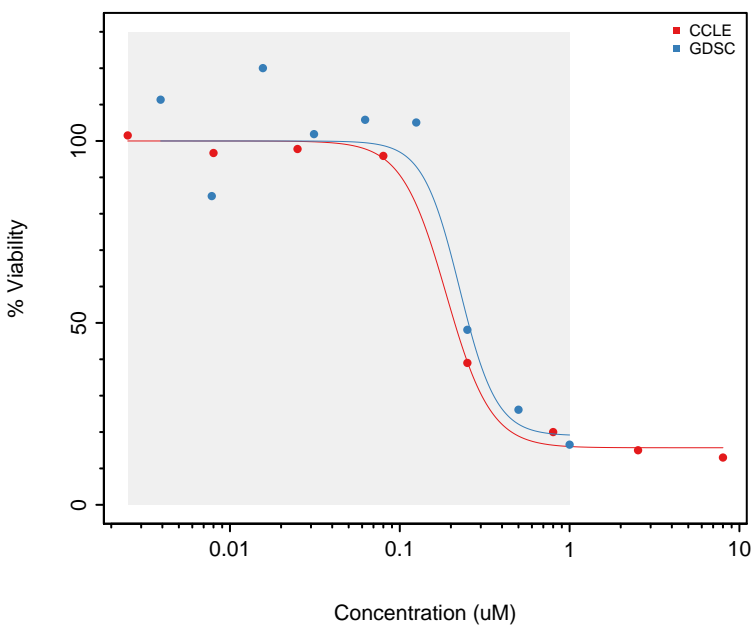

17-AAG:HCT-15

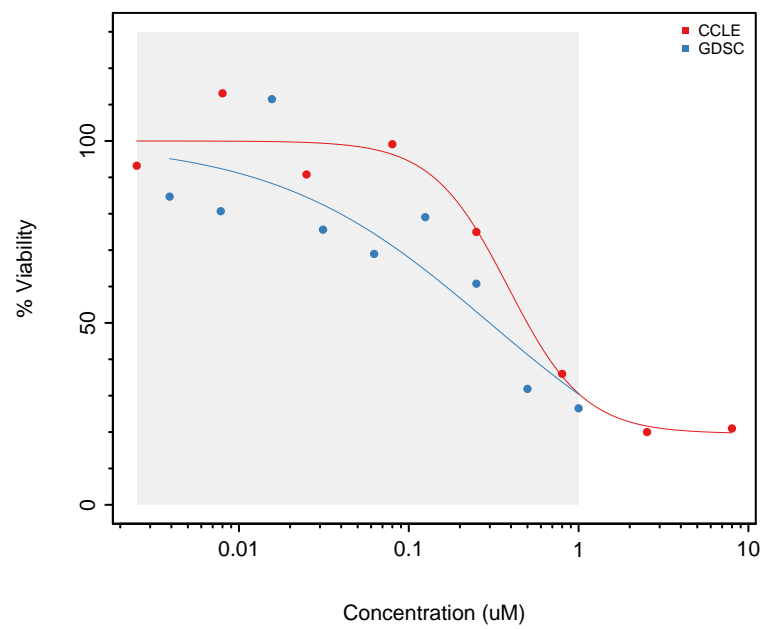

17-AAG:HD-MY-Z

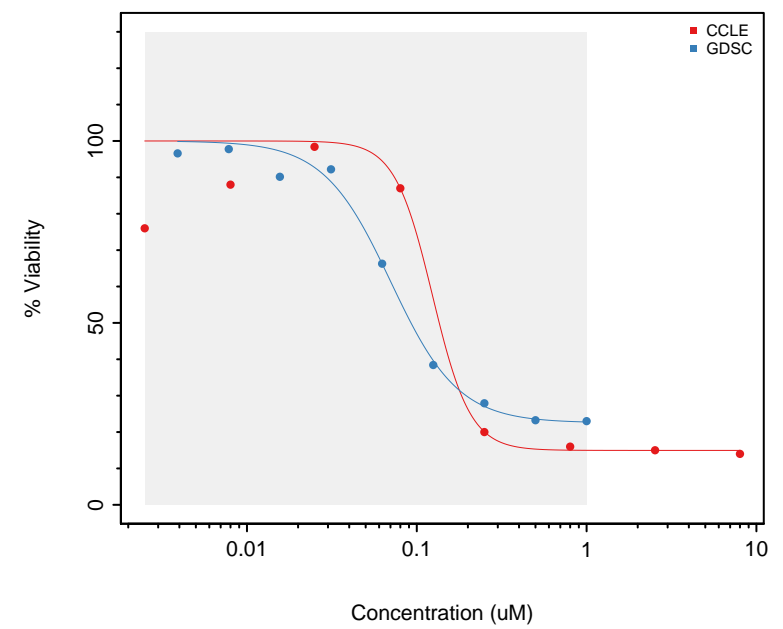

17-AAG:HEC-1

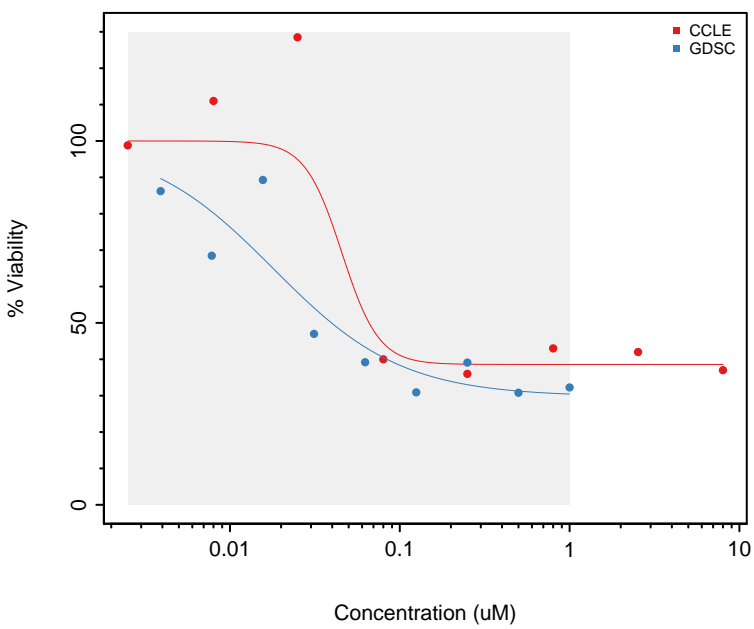

17-AAG:HGC-27

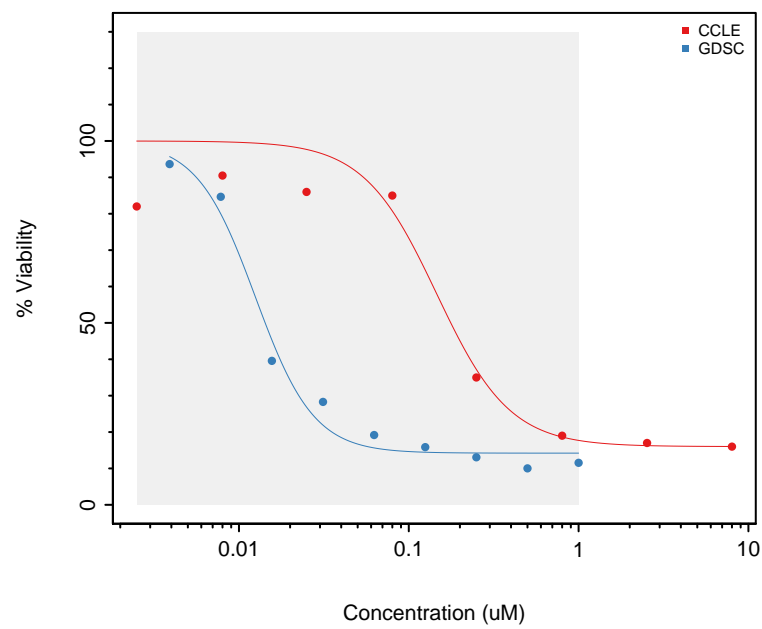

17-AAG:HH

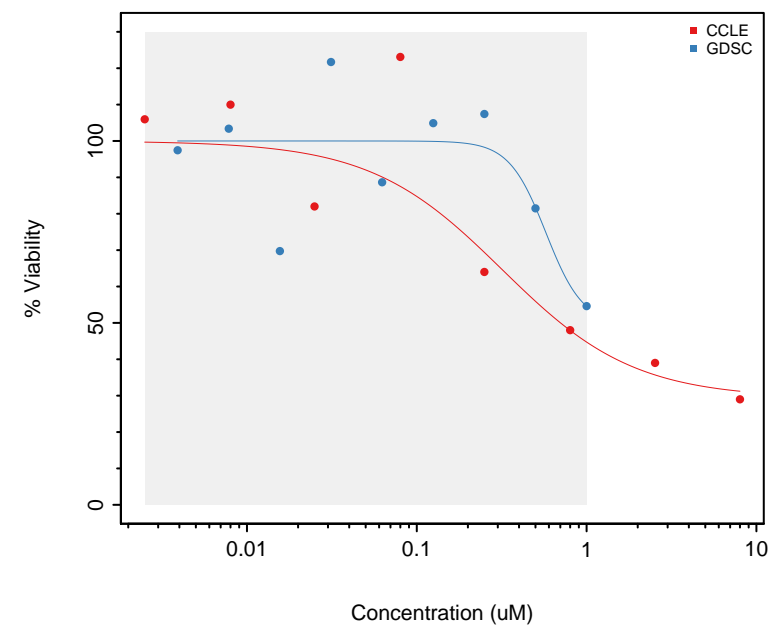

17-AAG:HLE

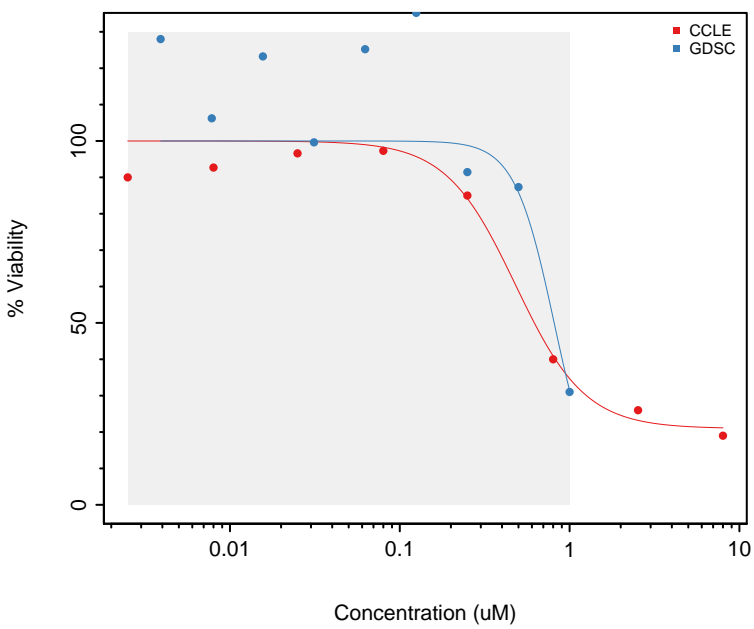

17-AAG:HOS

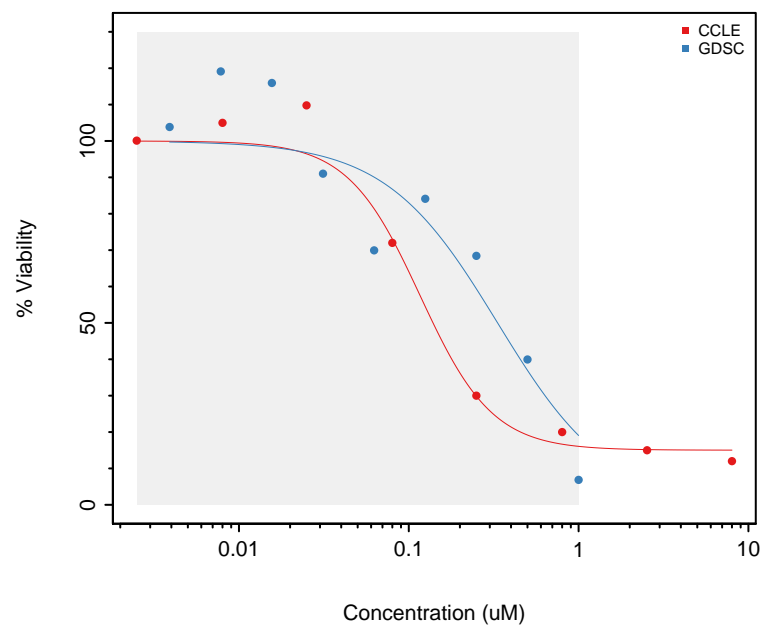

17-AAG:HPAF-II

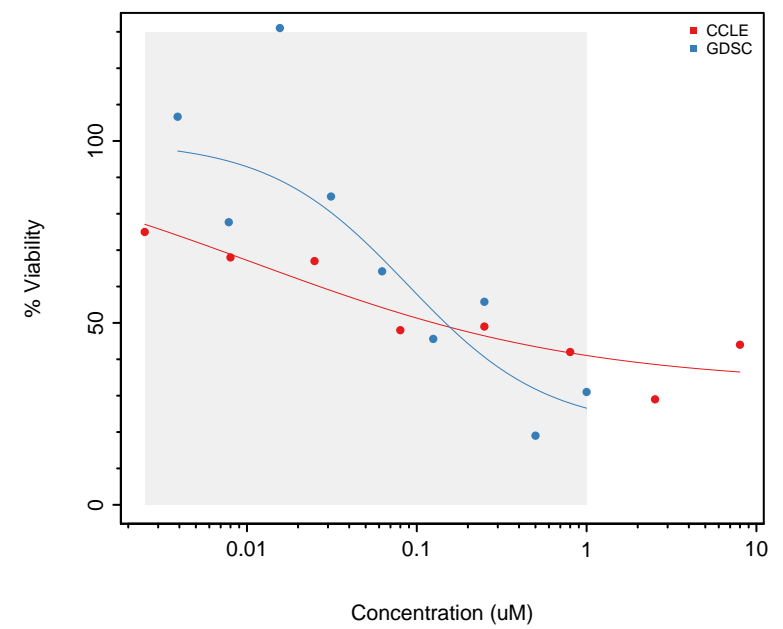





17-AAG:IGROV-1

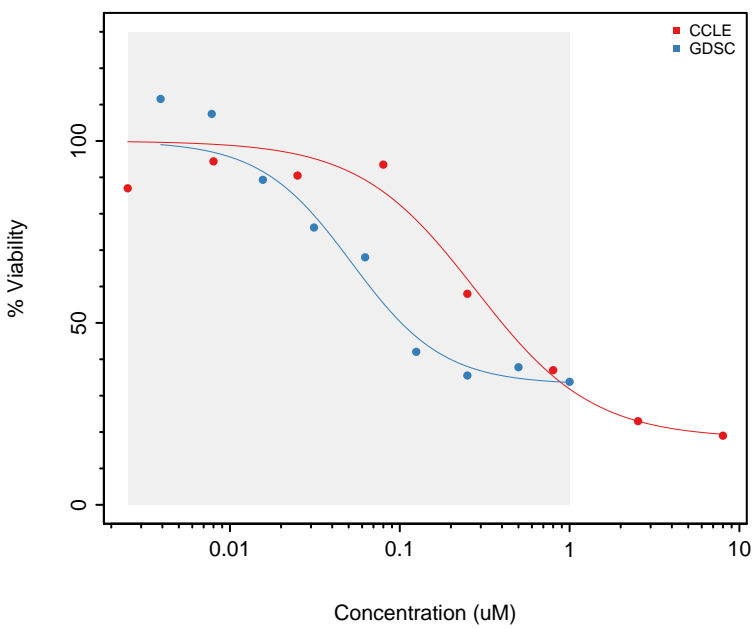

17-AAG:IPC-298

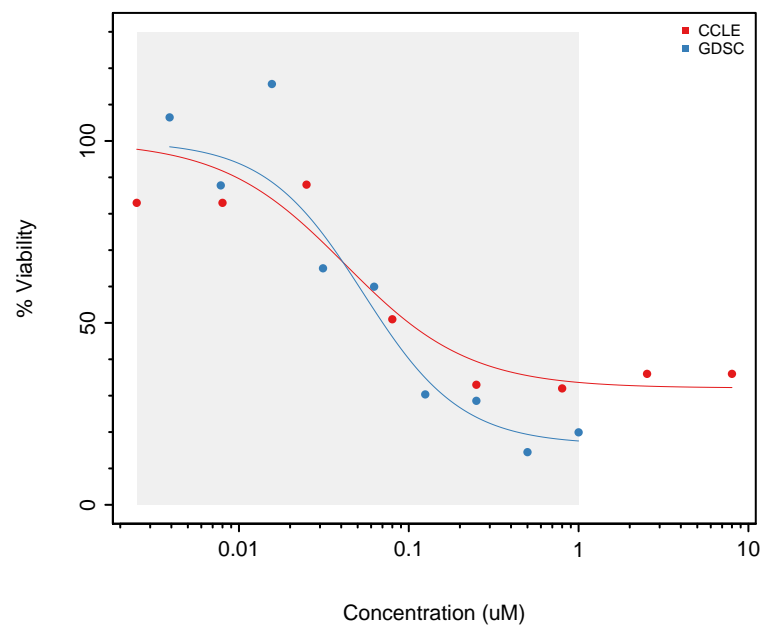

17-AAG:IST-MES1

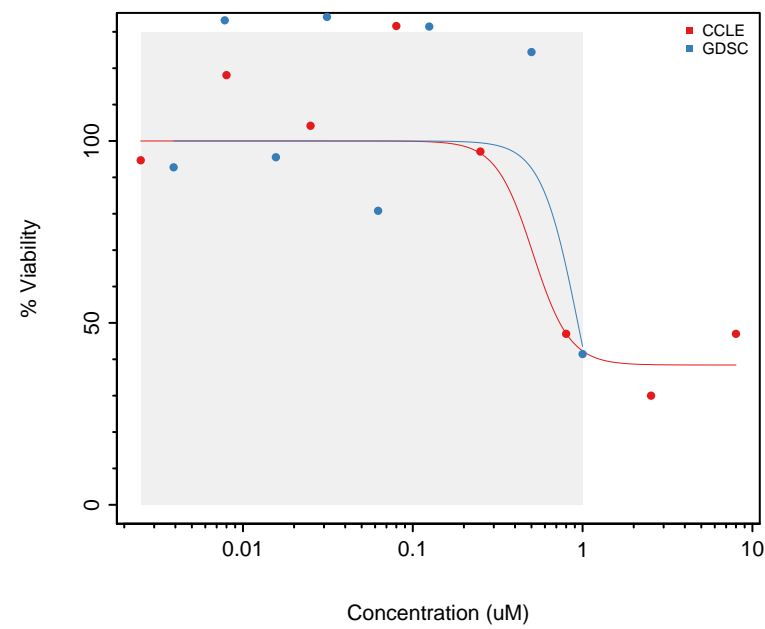

17-AAG:J82

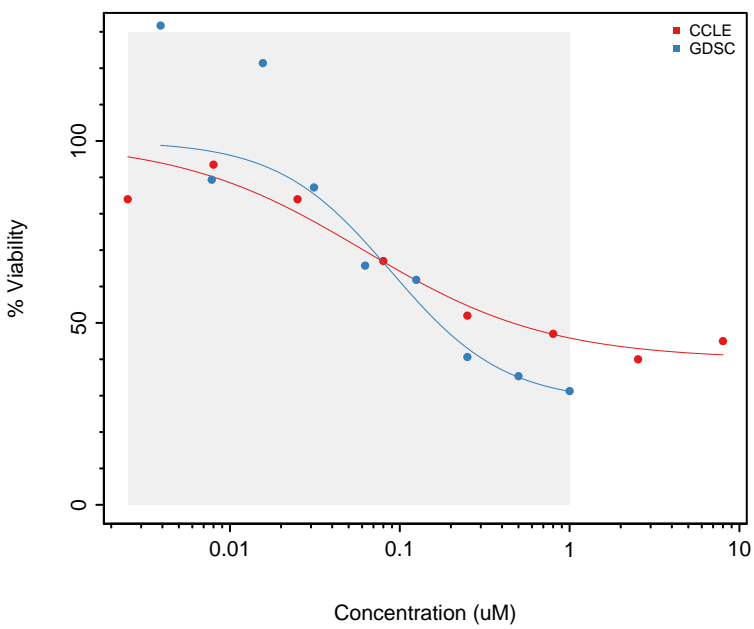

17-AAG:JVM-3

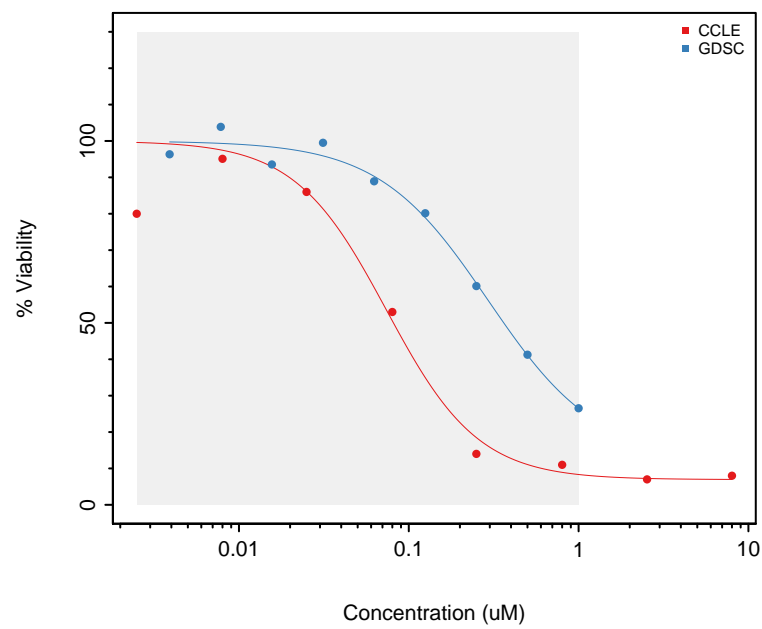

17-AAG:KALS-1

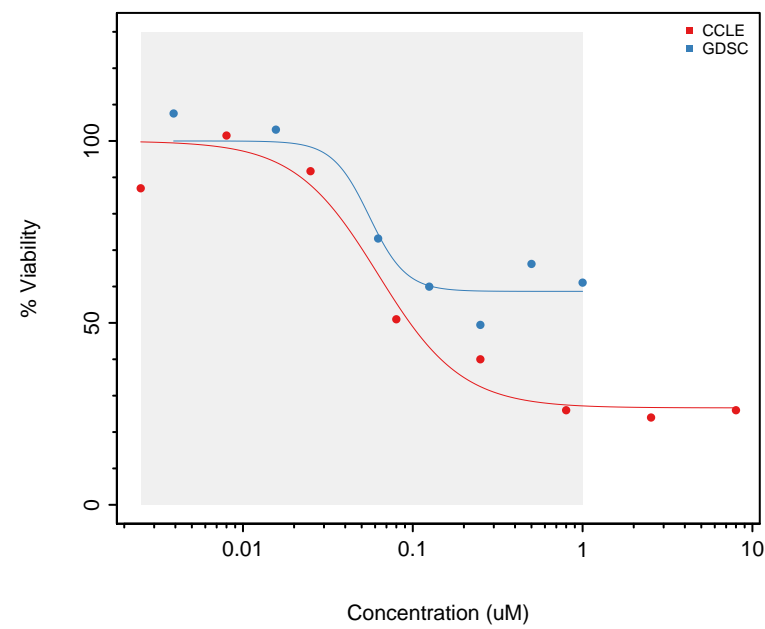

17-AAG:KARPAS-299

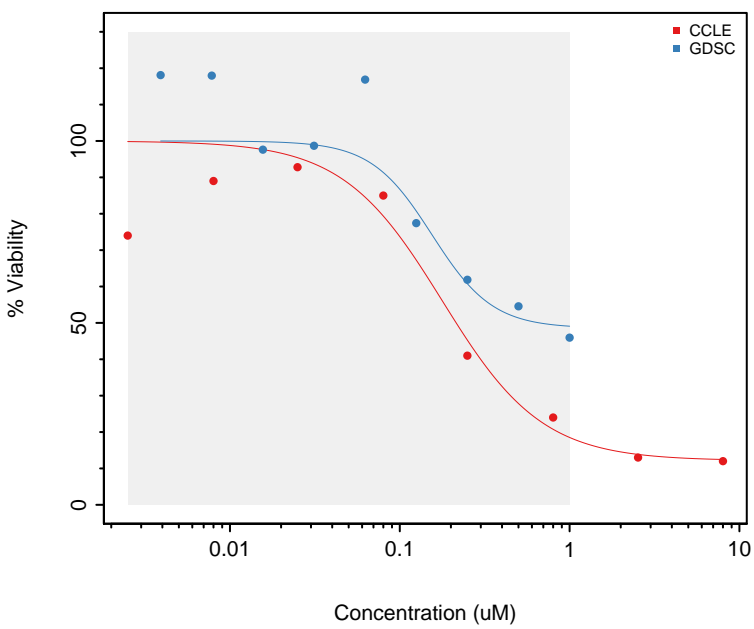

17-AAG:KARPAS-422

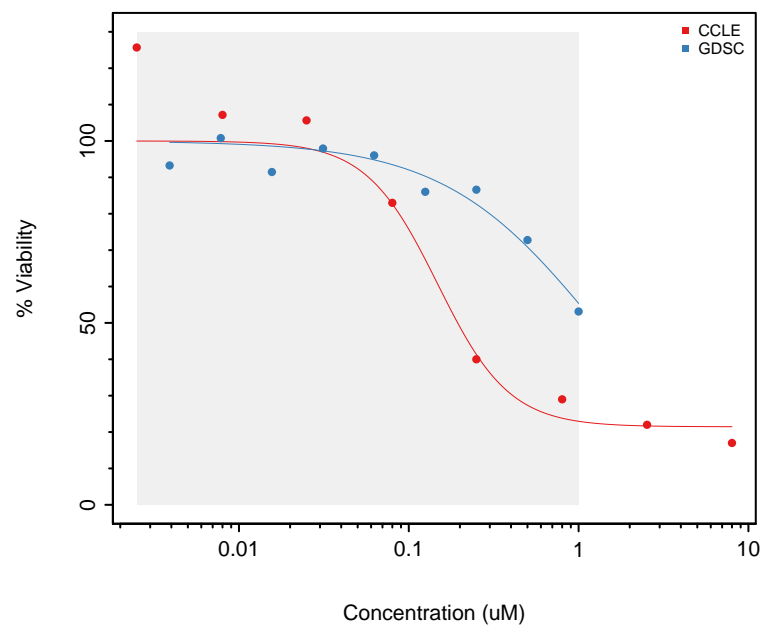

17-AAG:KG-1

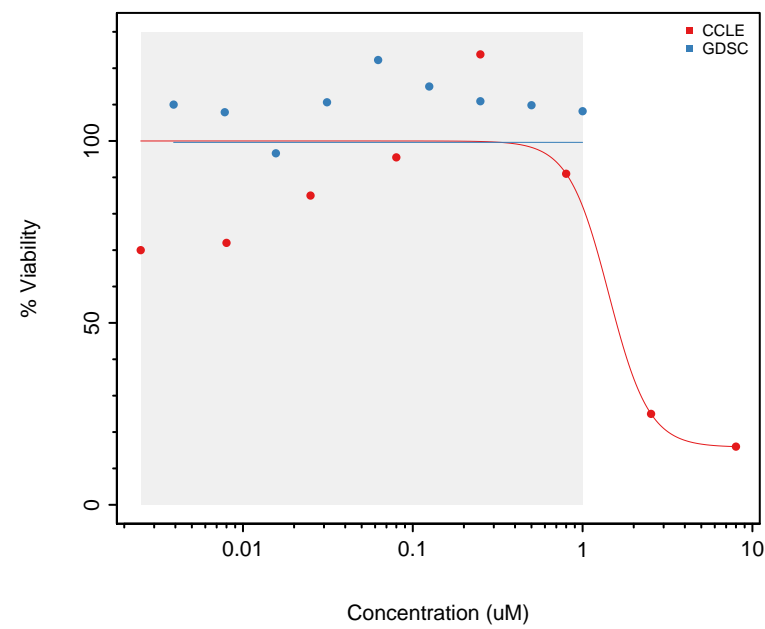

17-AAG:KLE

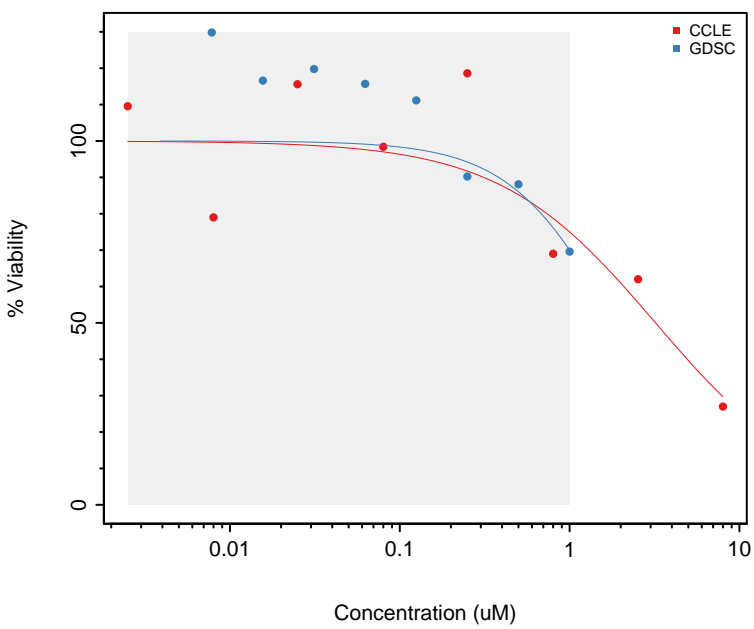

17-AAG:KNS-42

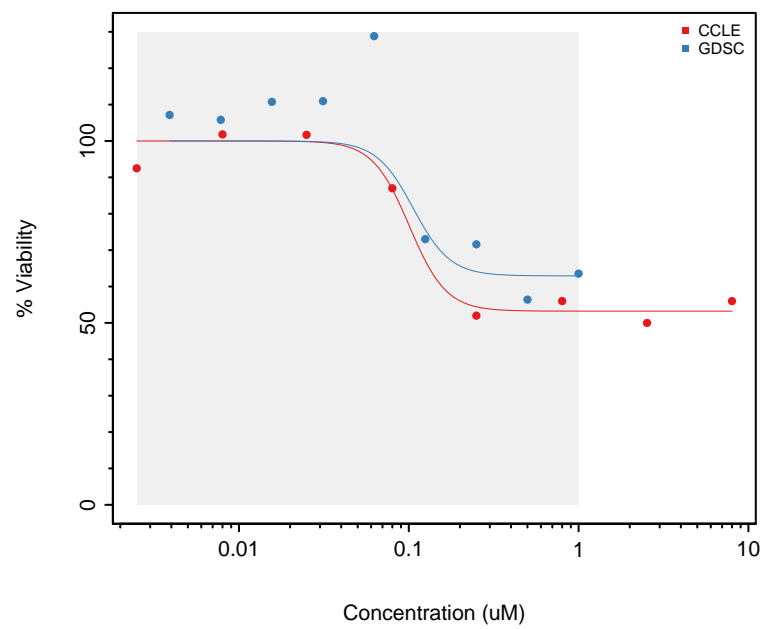

17-AAG:KNS-81-FD

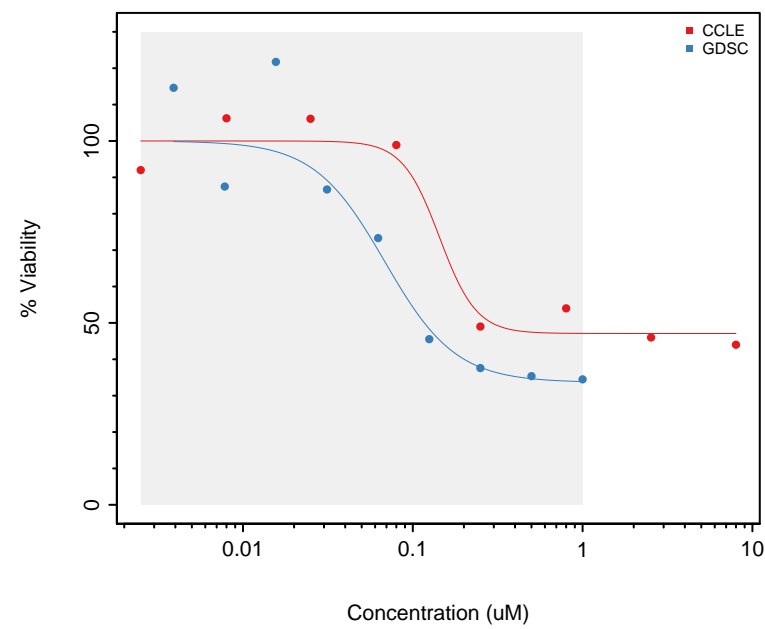

17-AAG:KP-4

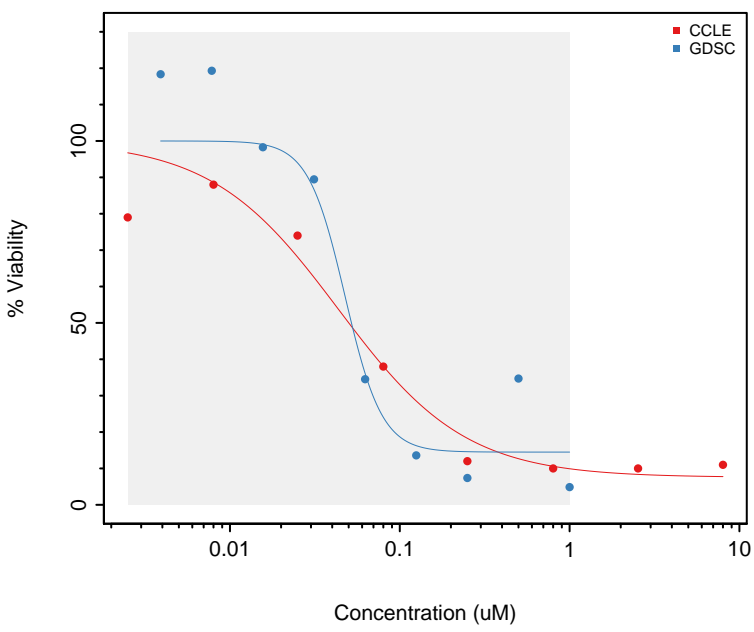

17-AAG:KU812

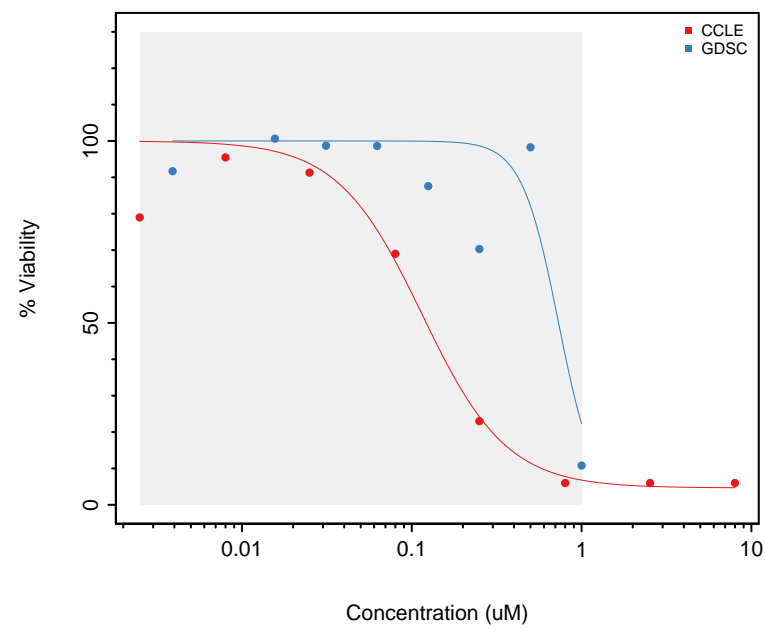

17-AAG:KURAMOCHI

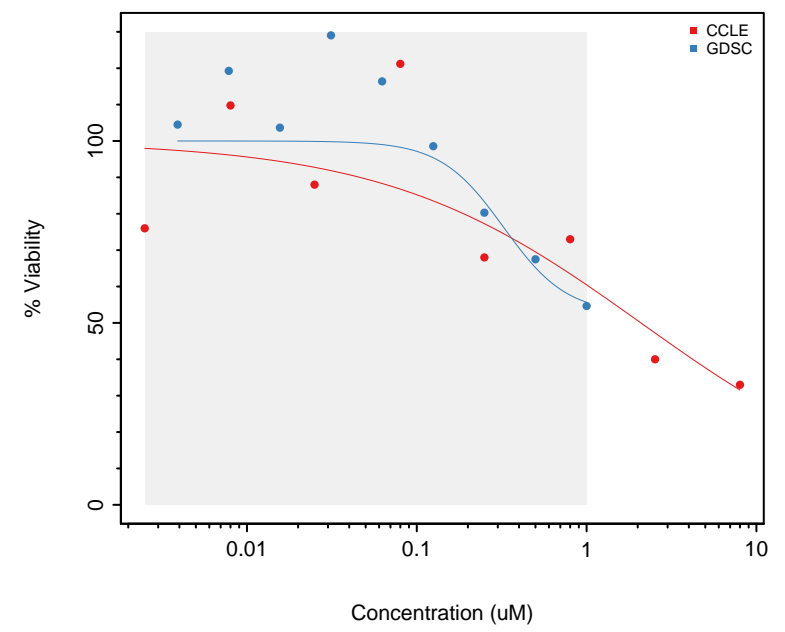

17-AAG:KYSE-140

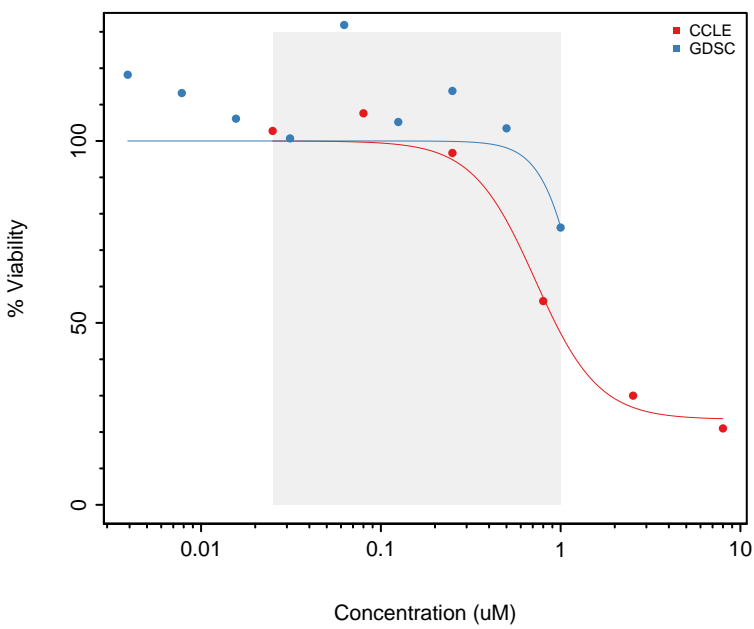

17-AAG:KYSE-150

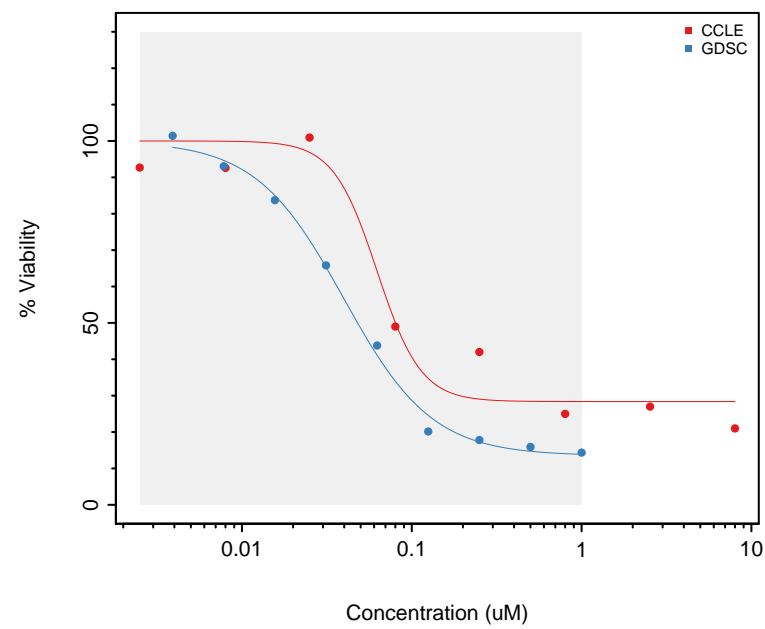

17-AAG:KYSE-180

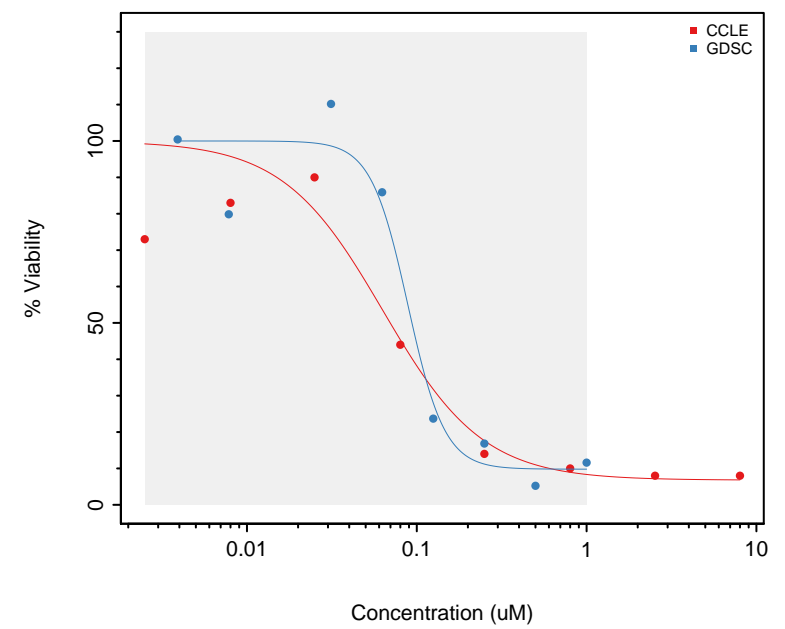

17-AAG:KYSE-410

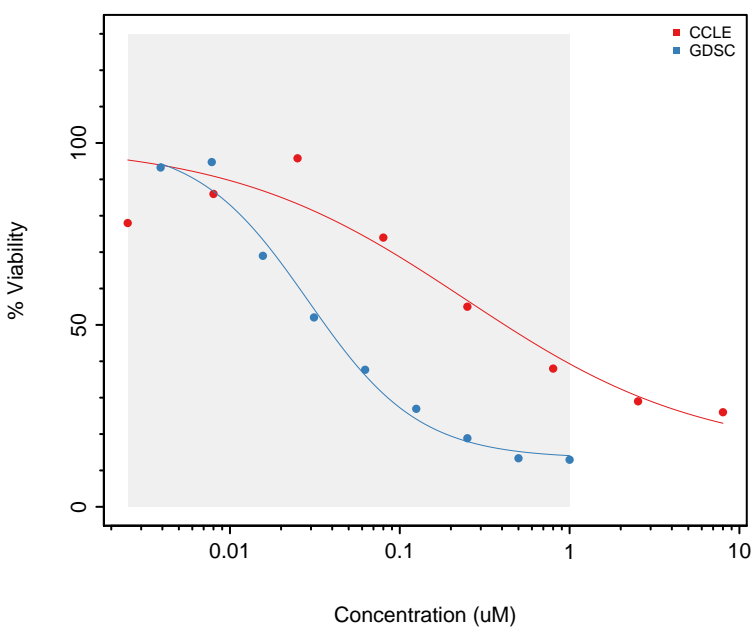

17-AAG:KYSE-450

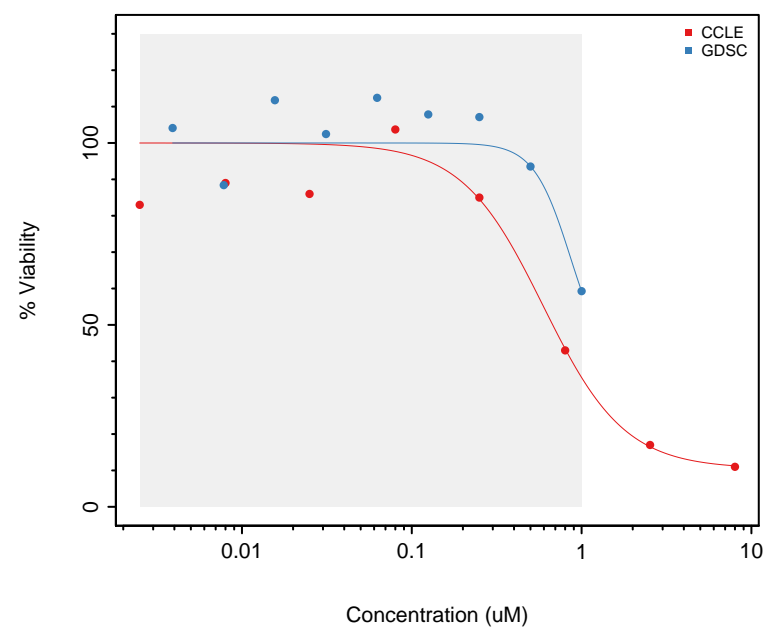

17-AAG:KYSE-510

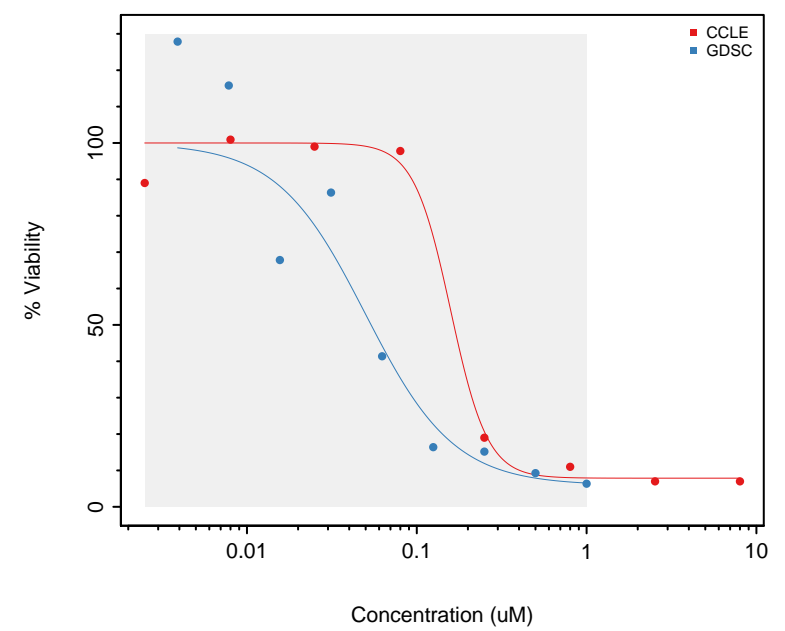

17-AAG:KYSE-520

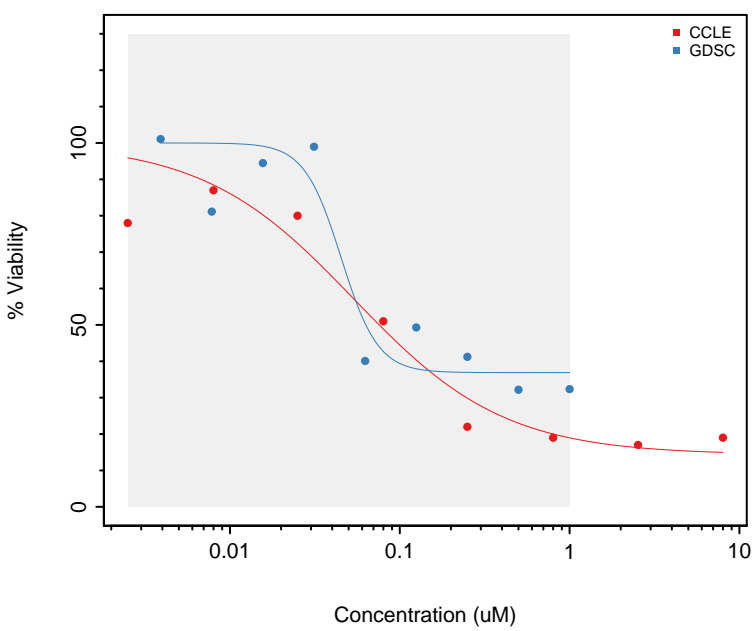

17-AAG:KYSE-70

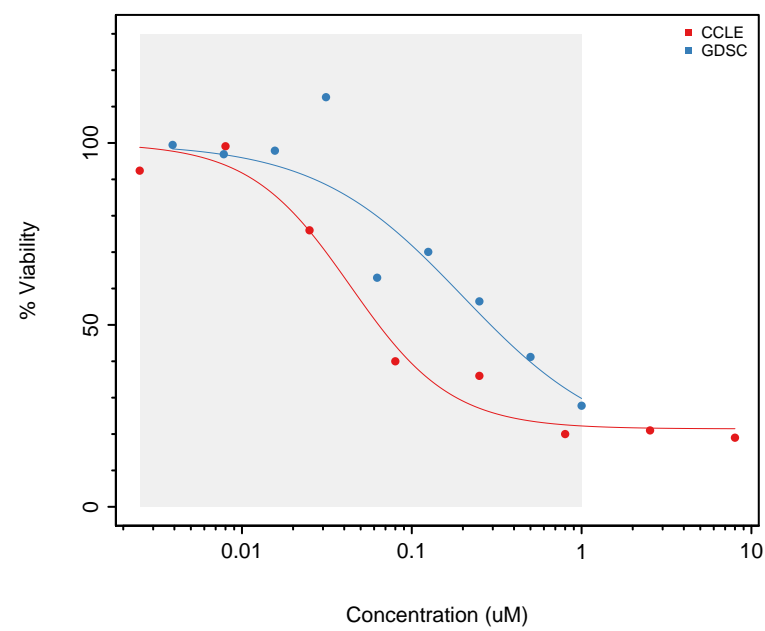

17-AAG:L-363

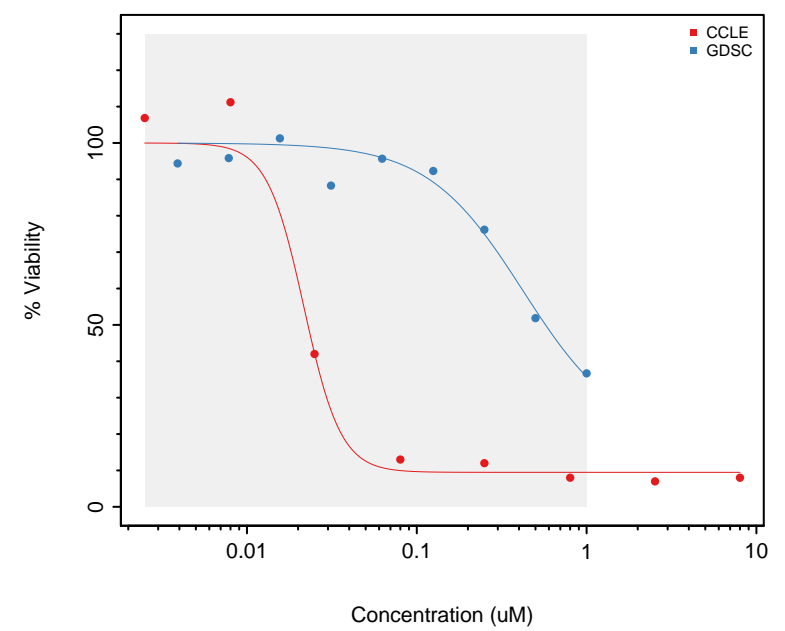

17-AAG:L-428

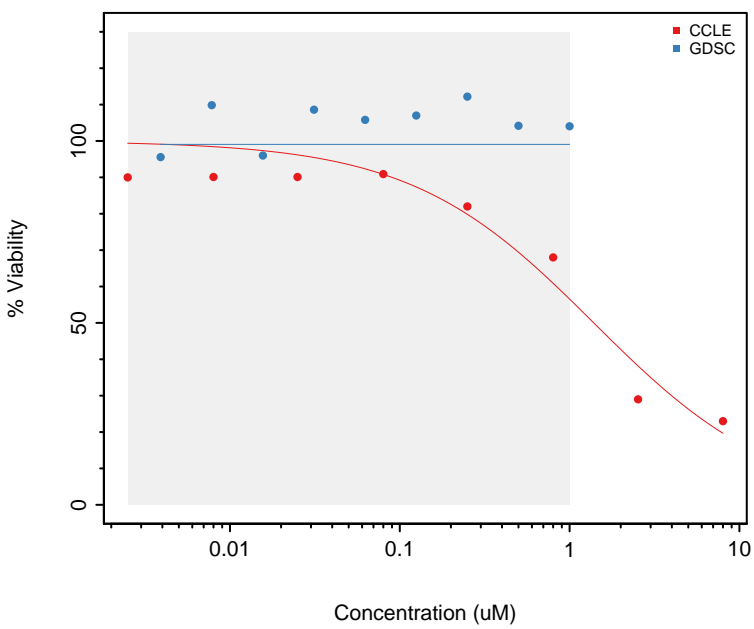

17-AAG:LCLC-103H

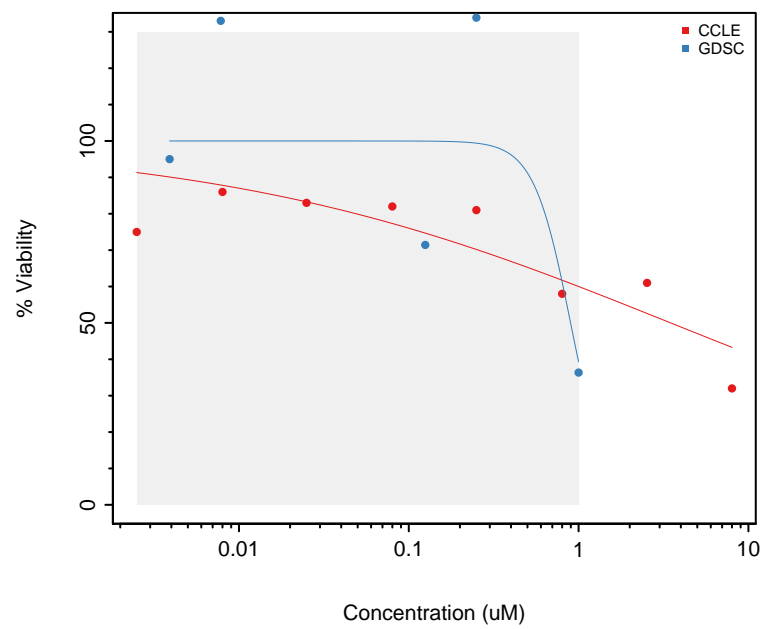

17-AAG:LOXIMVI

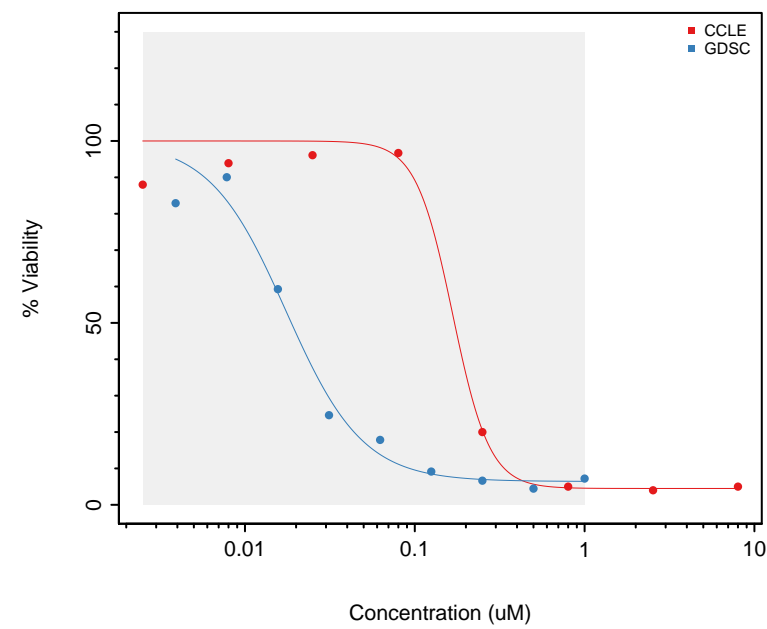

17-AAG:LP-1

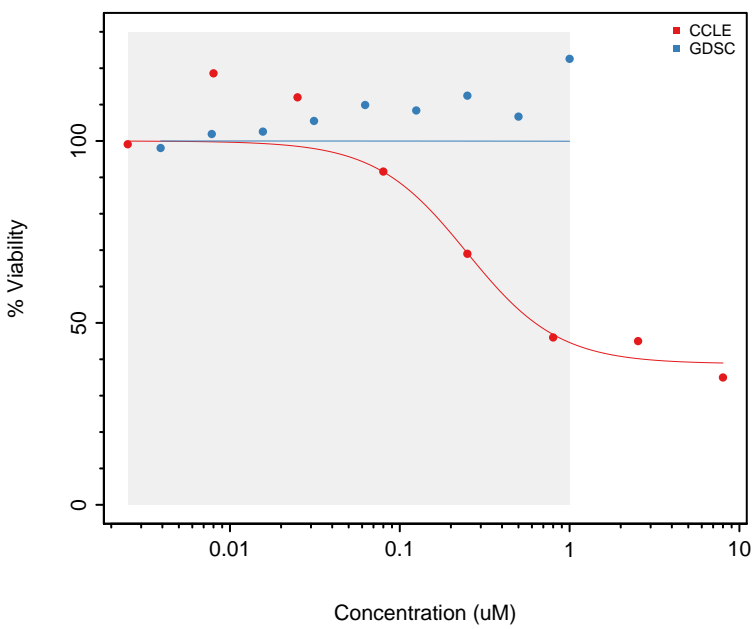

17-AAG:LS-123

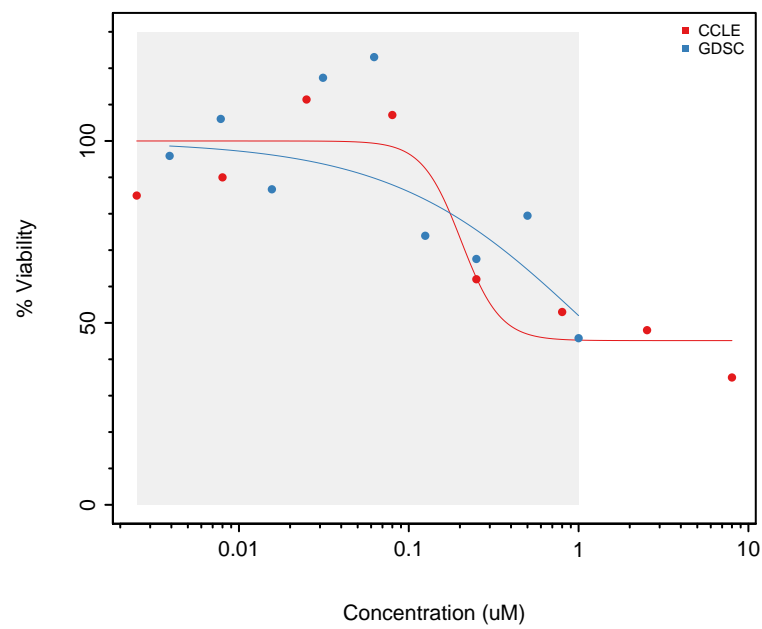

17-AAG:LS-411N

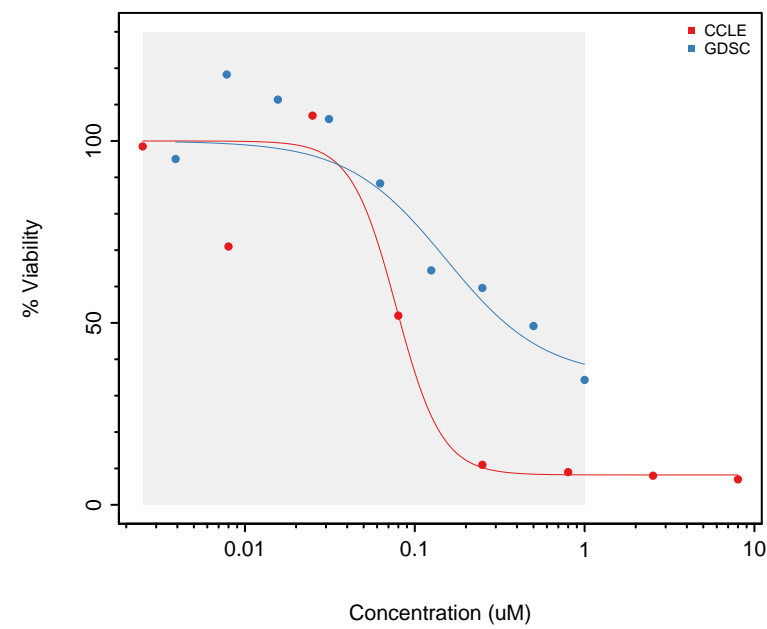

17-AAG:LS-513

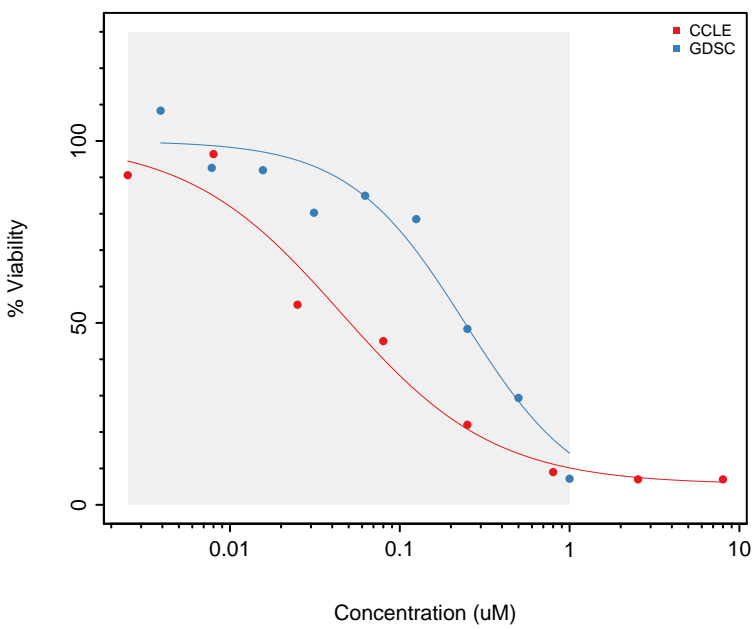

17-AAG:LU-99A

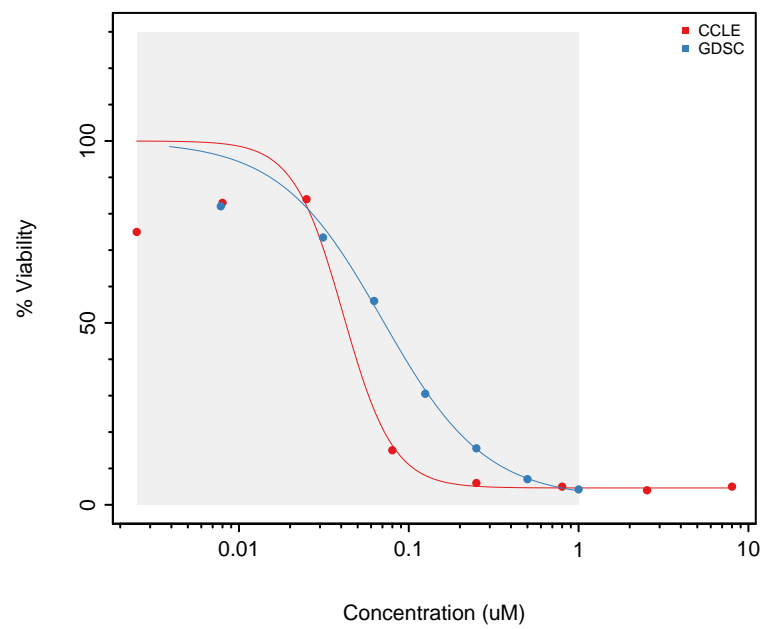

17-AAG:M059J

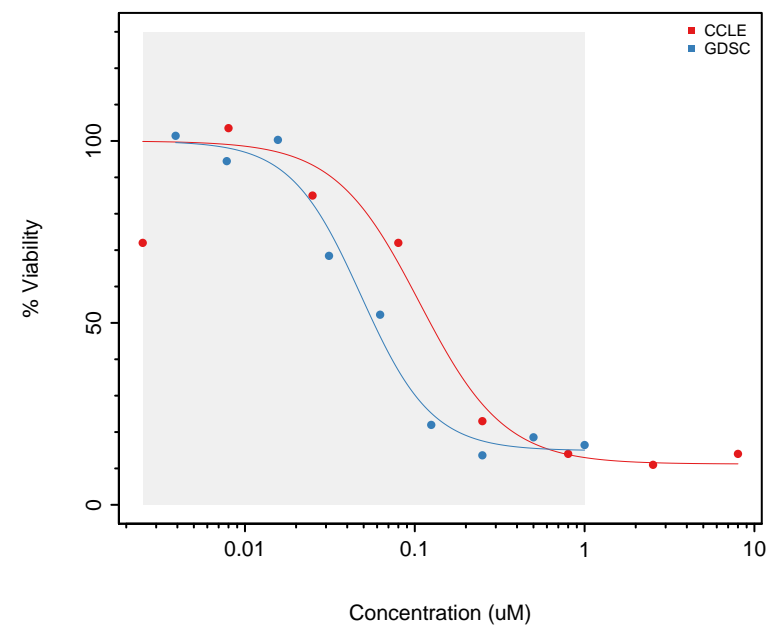

17-AAG:MC116

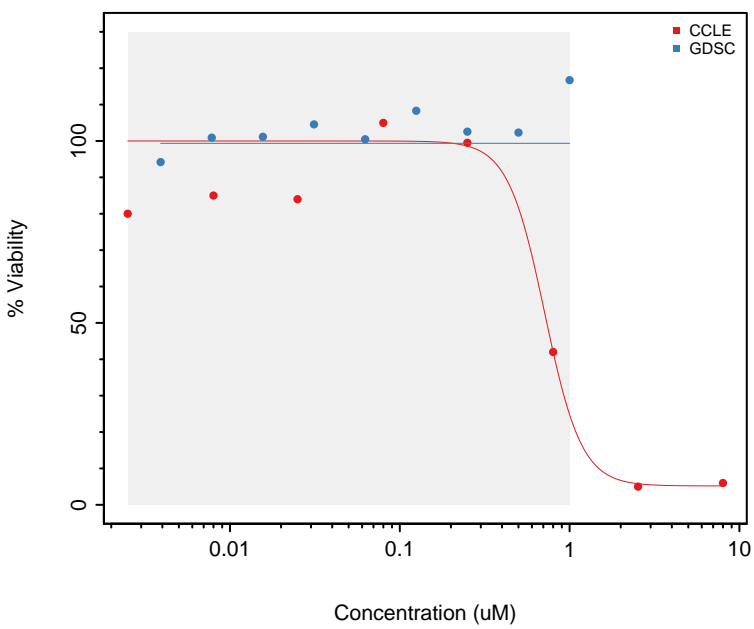

17-AAG:MCF7

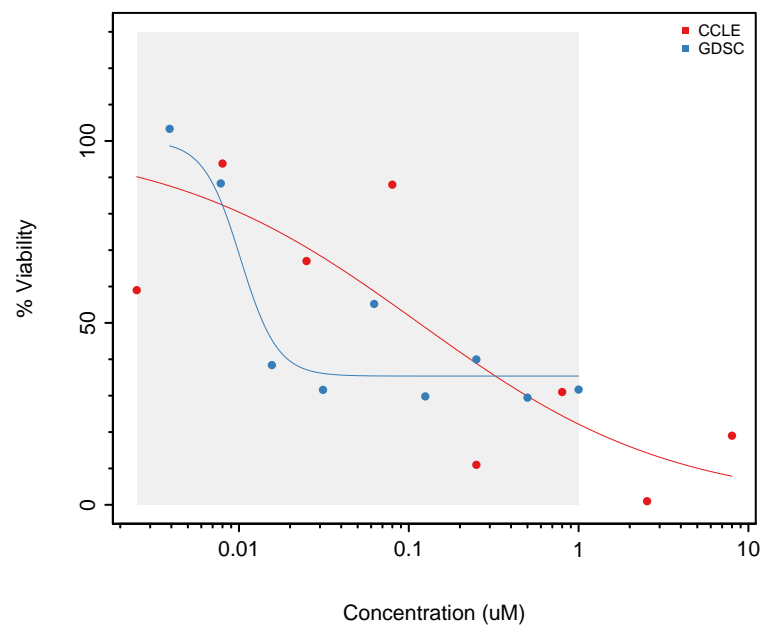

17-AAG:MDA-MB-157

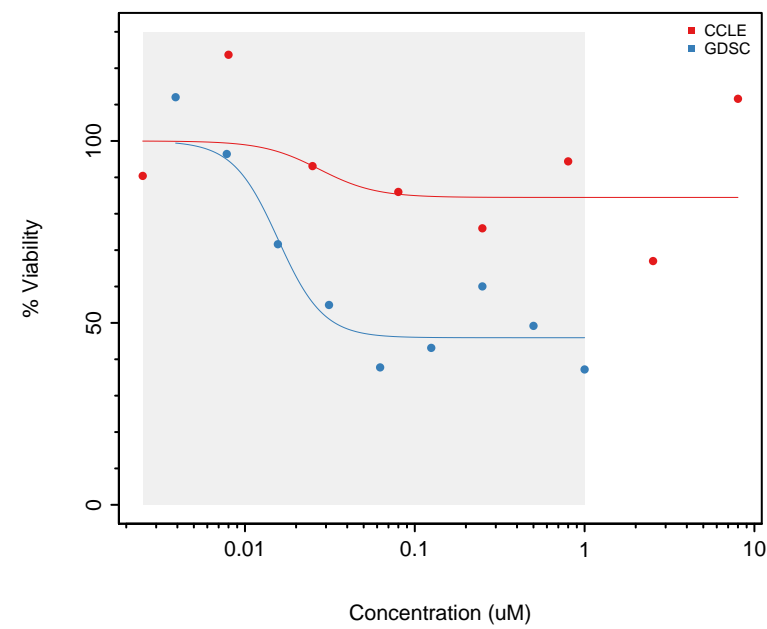

17-AAG:MDA-MB-175-VII

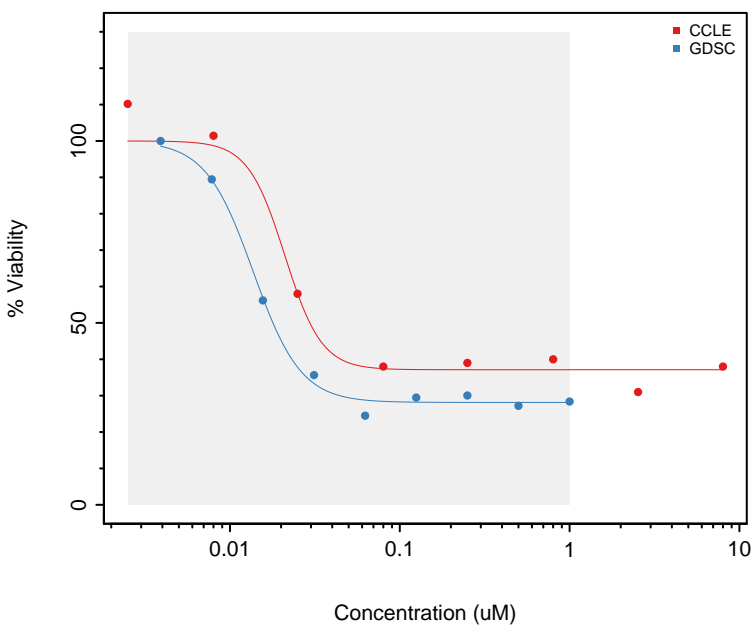

17-AAG:MDA-MB-415

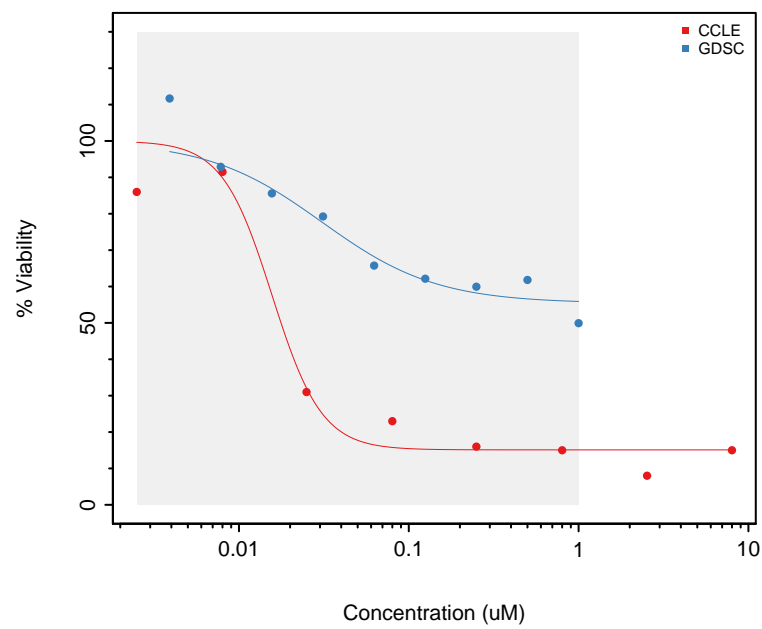

17-AAG:MDA-MB-453

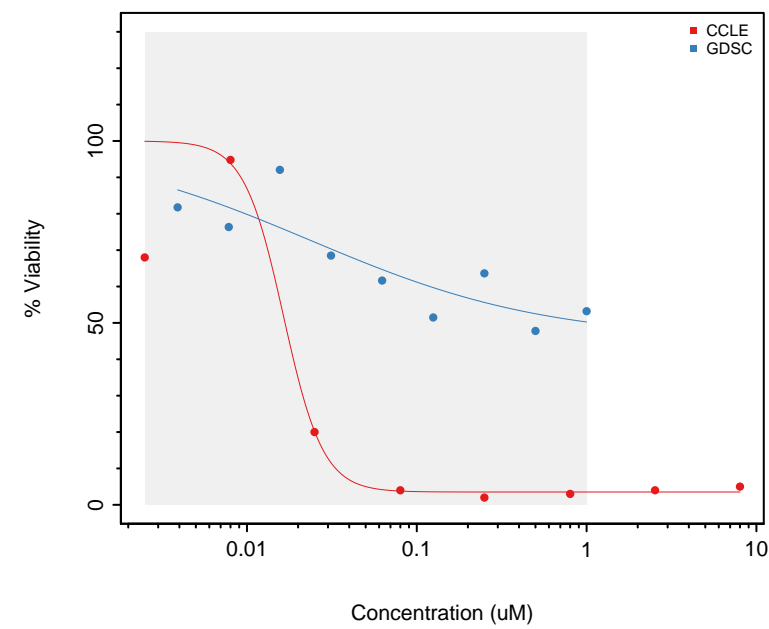

17-AAG:MDA-MB-468

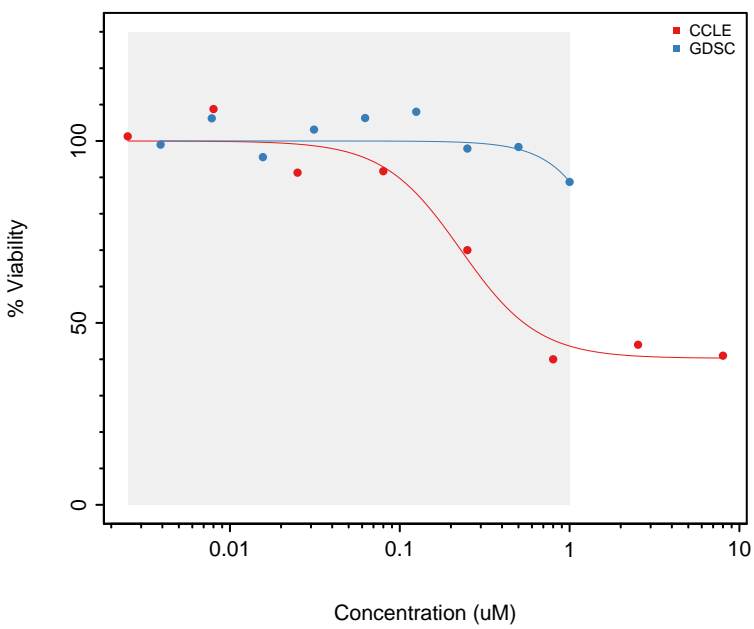

17-AAG:MEG-01

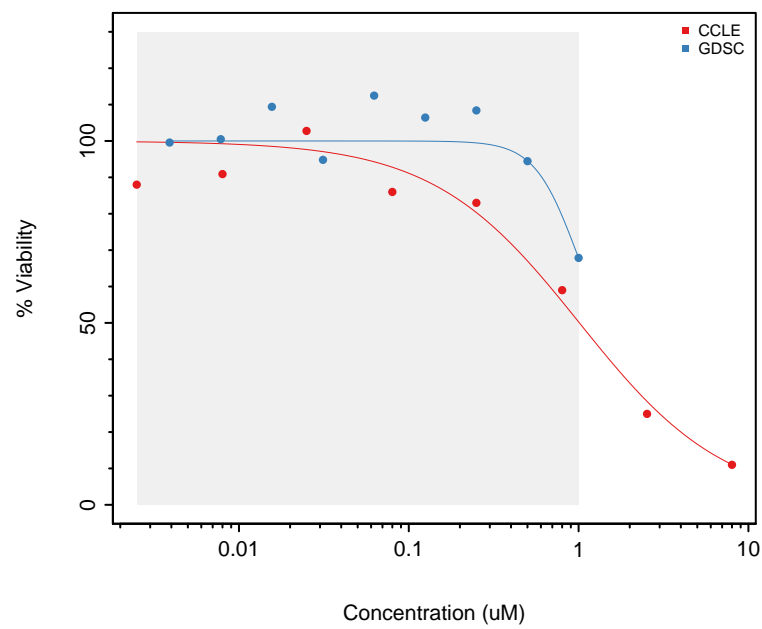

17-AAG:MEL-HO

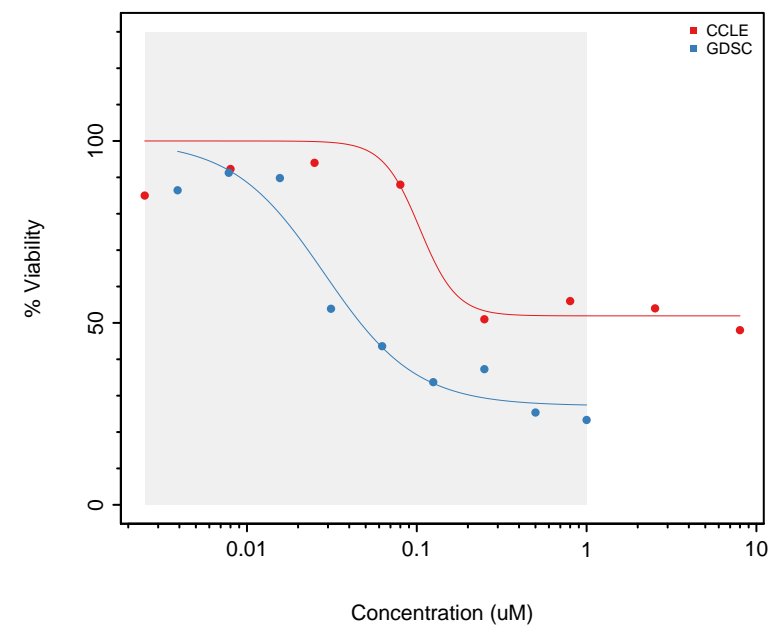

17-AAG:MES-SA

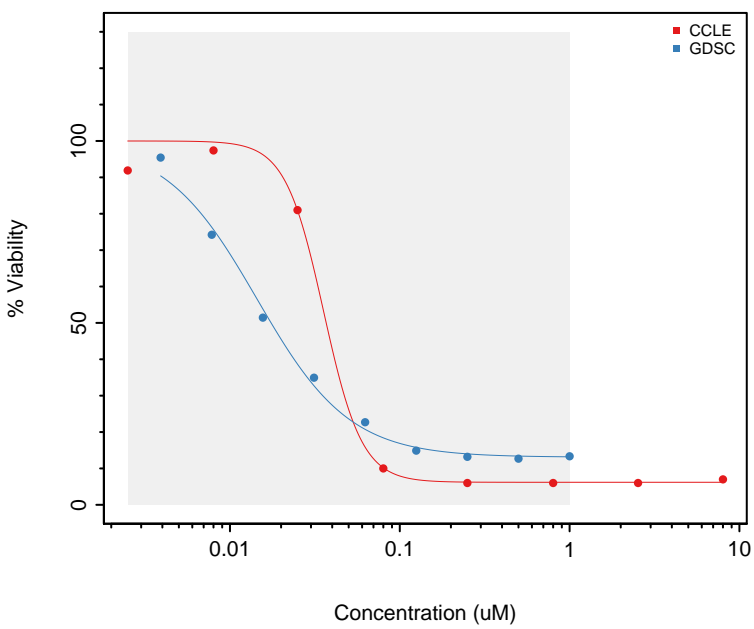

17-AAG:Mewo

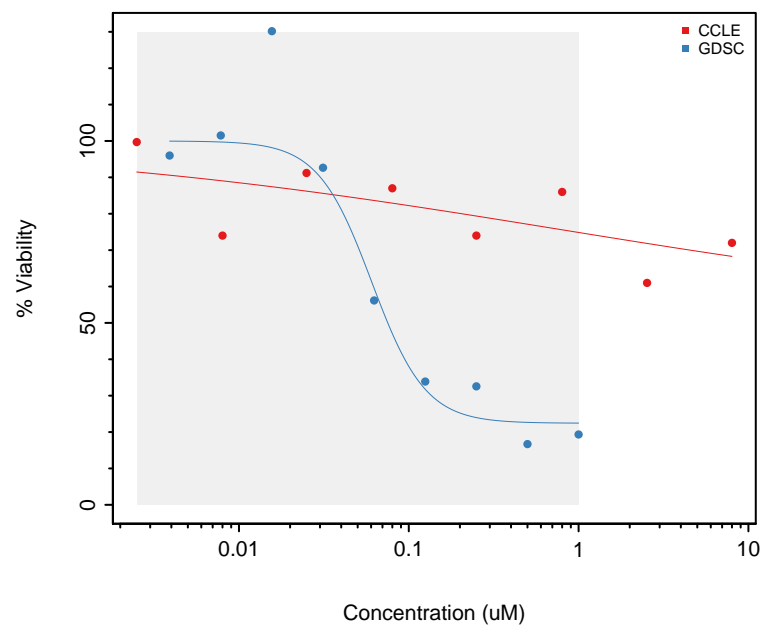

17-AAG:MFE-280

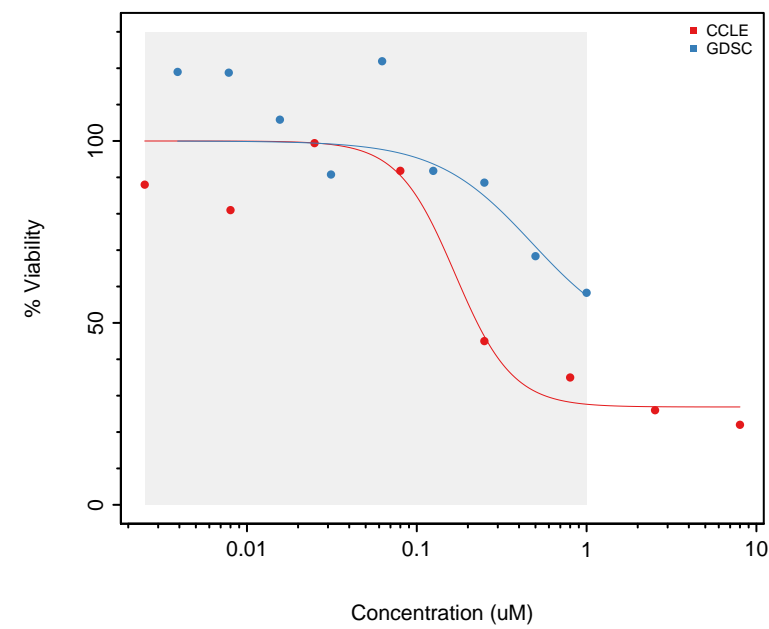

17-AAG:MFE-296

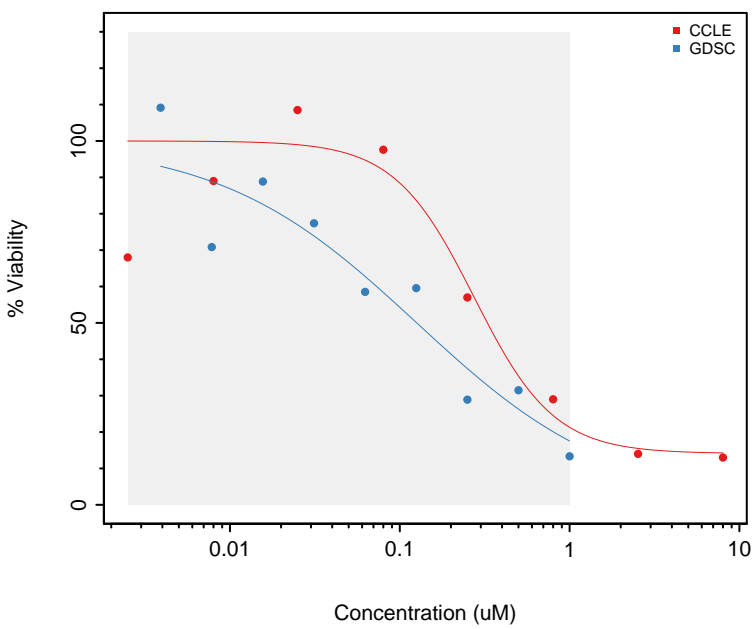

17-AAG:MG-63

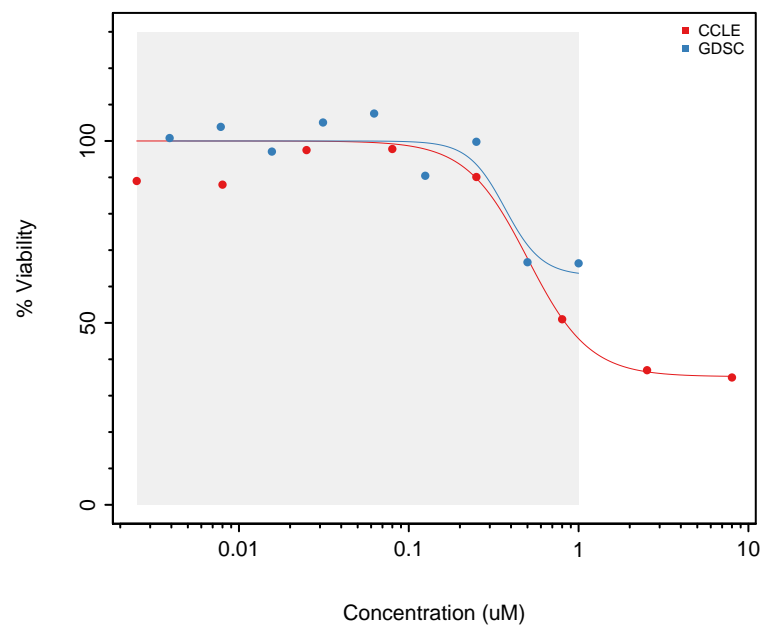

17-AAG:MHH-ES-1

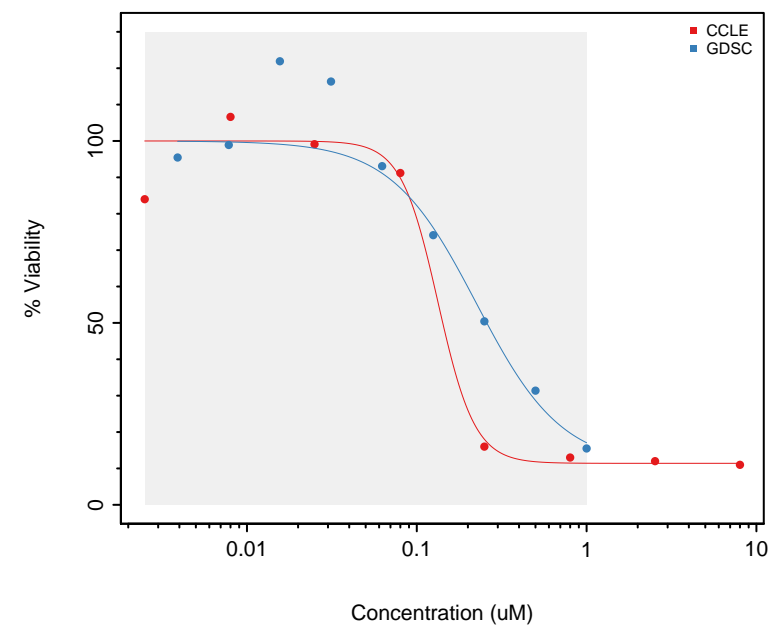

17-AAG:MIA-PaCa-2

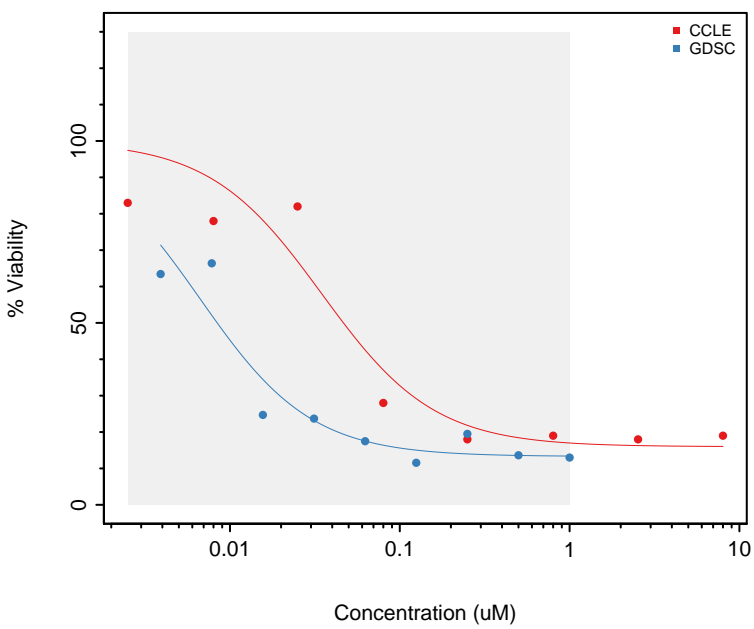

17-AAG:MKN45

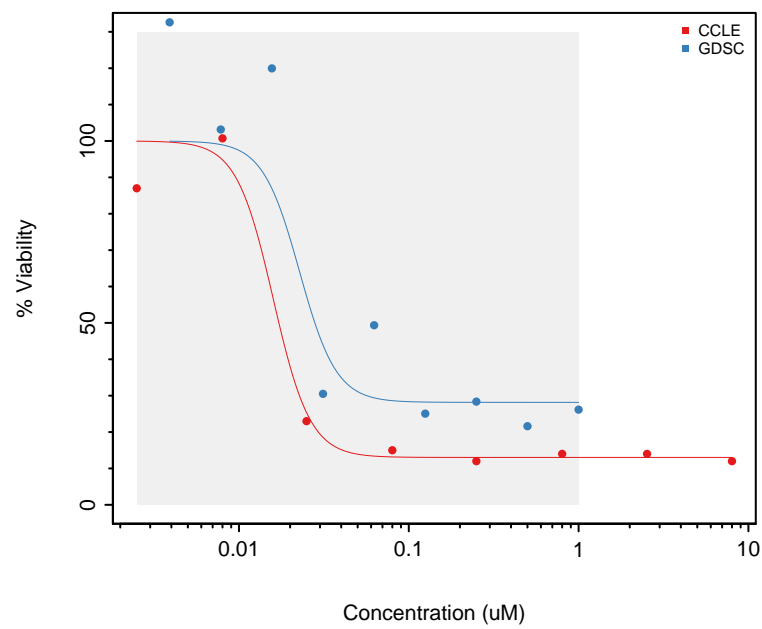

17-AAG:MKN7

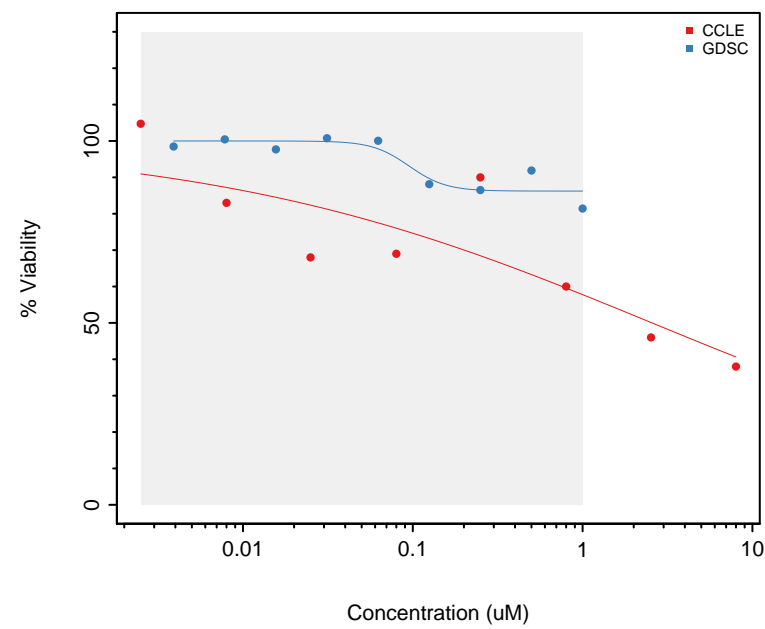

17-AAG:MOLT-16

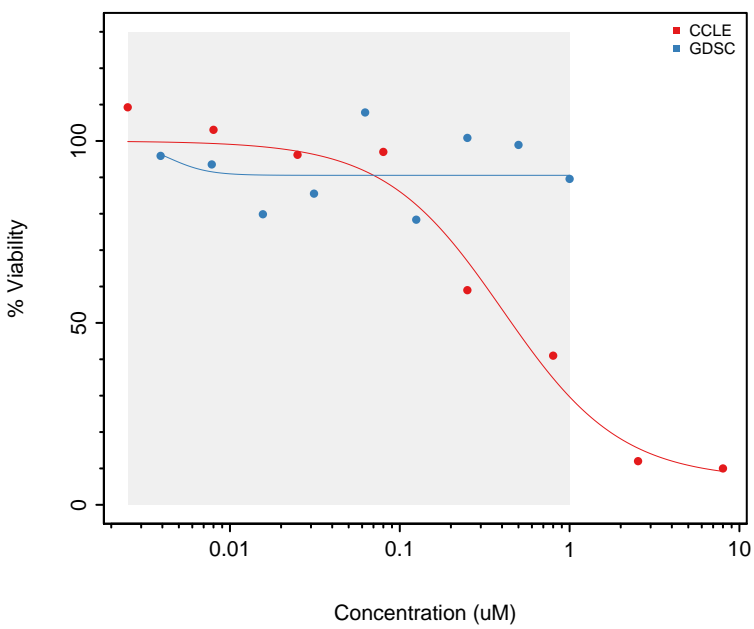

17-AAG:MPP-89

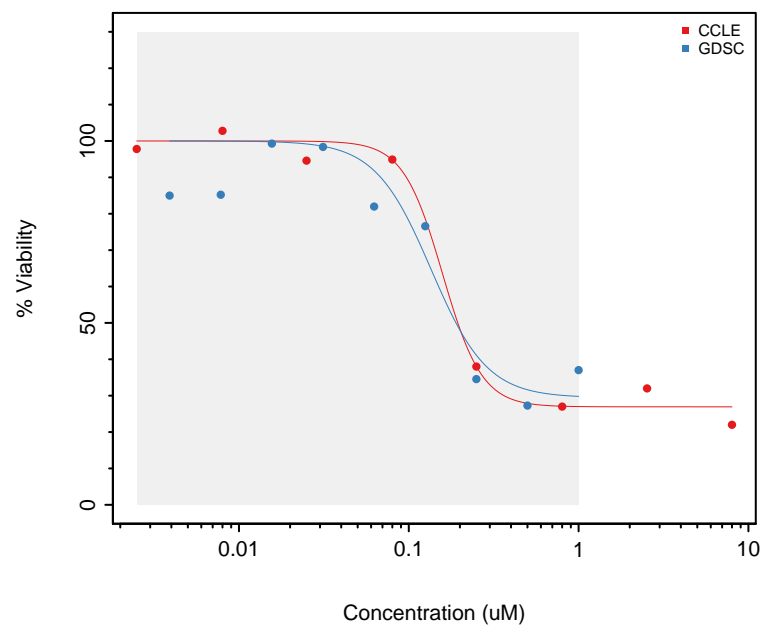

17-AAG:MSTO-211H

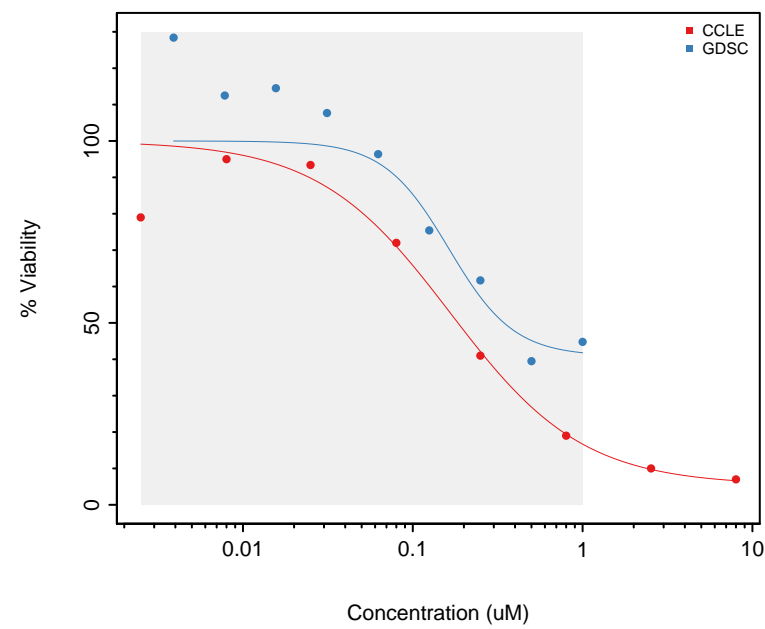

17-AAG:NCI-H1048

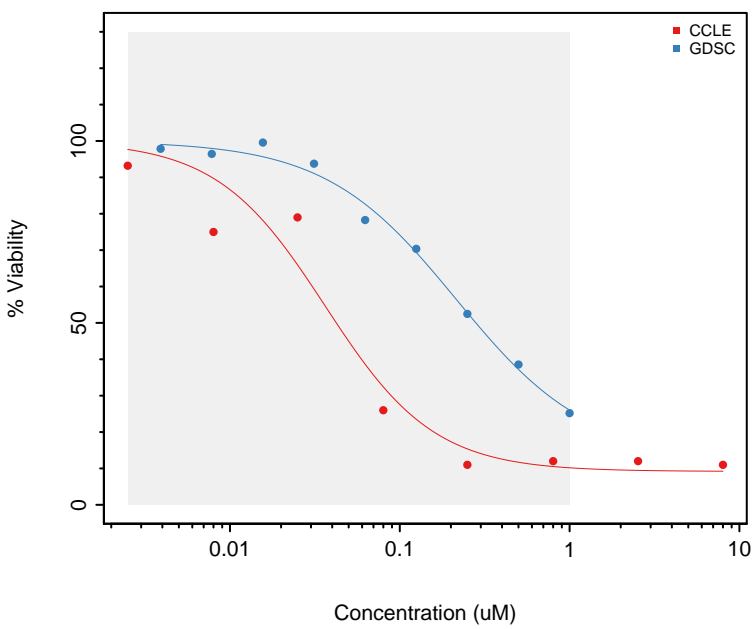

17-AAG:NCI-H1092

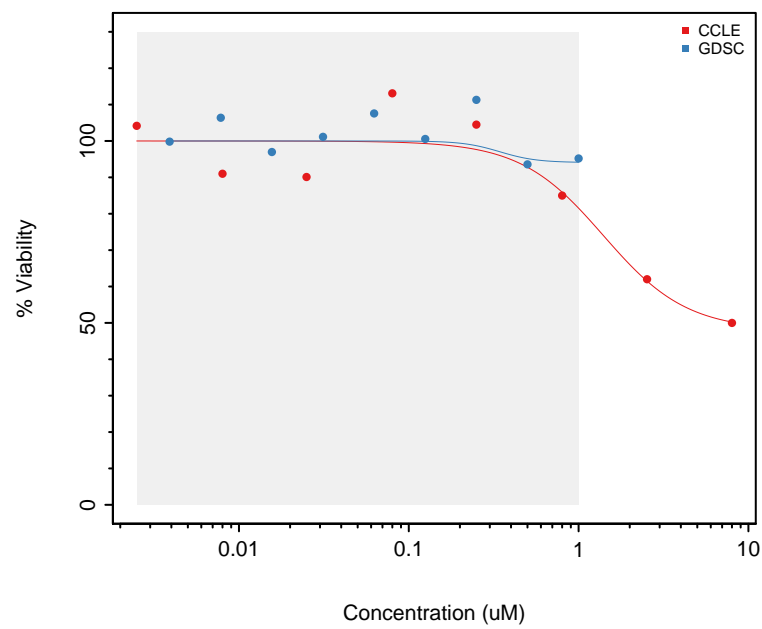

17-AAG:NCI-H1155

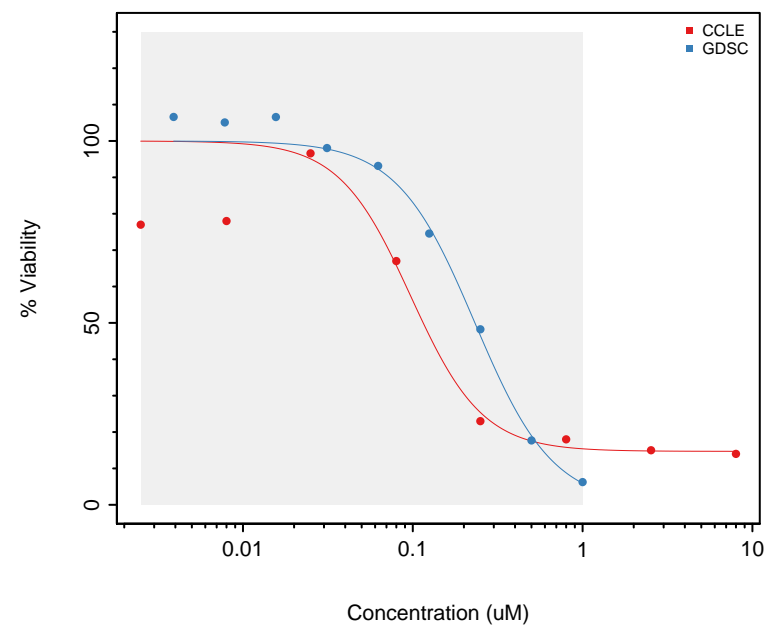

17-AAG:NCI-H1299

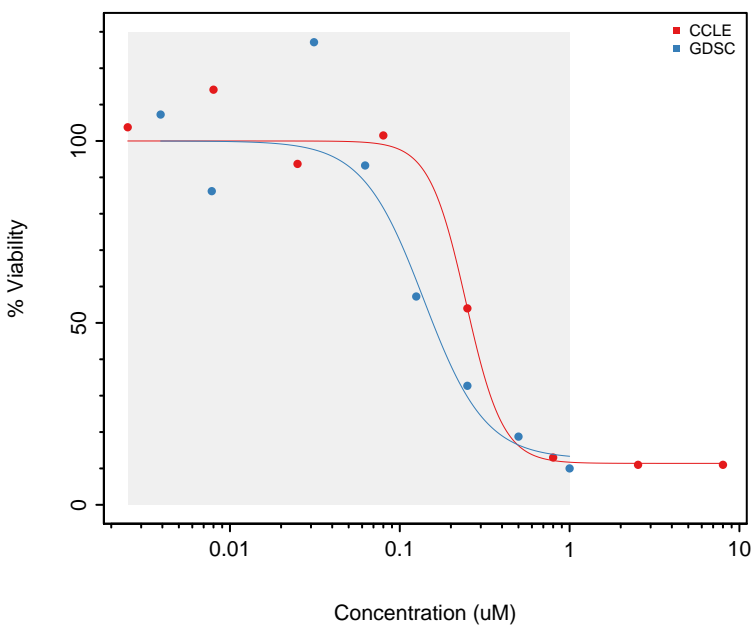

17-AAG:NCI-H1355

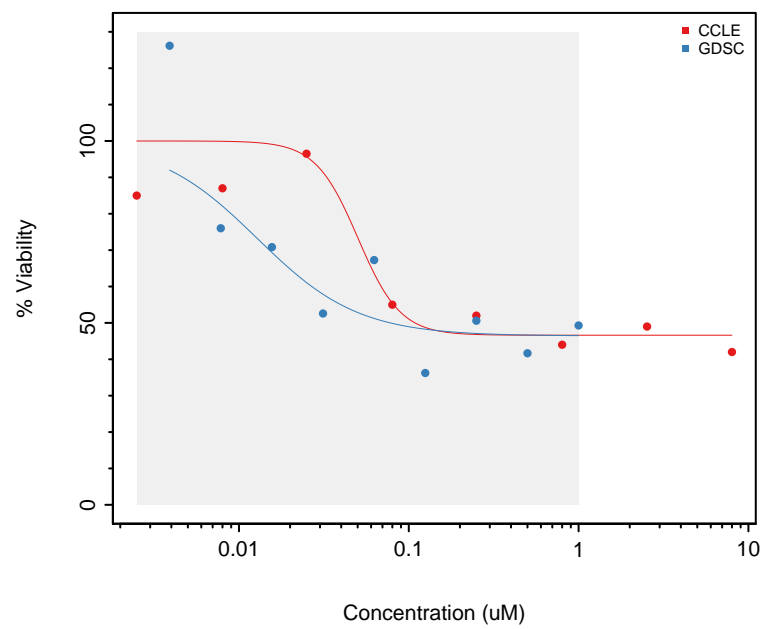

17-AAG:NCI-H1563

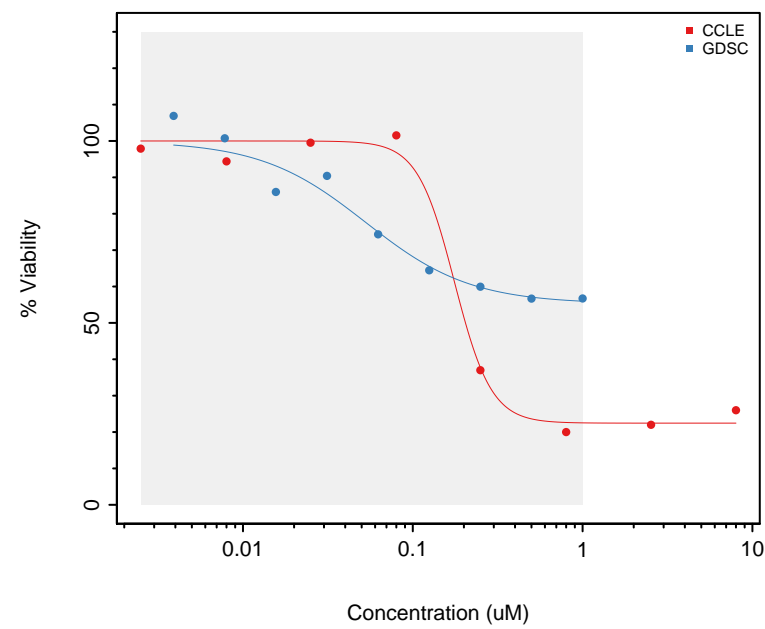

17-AAG:NCI-H1573

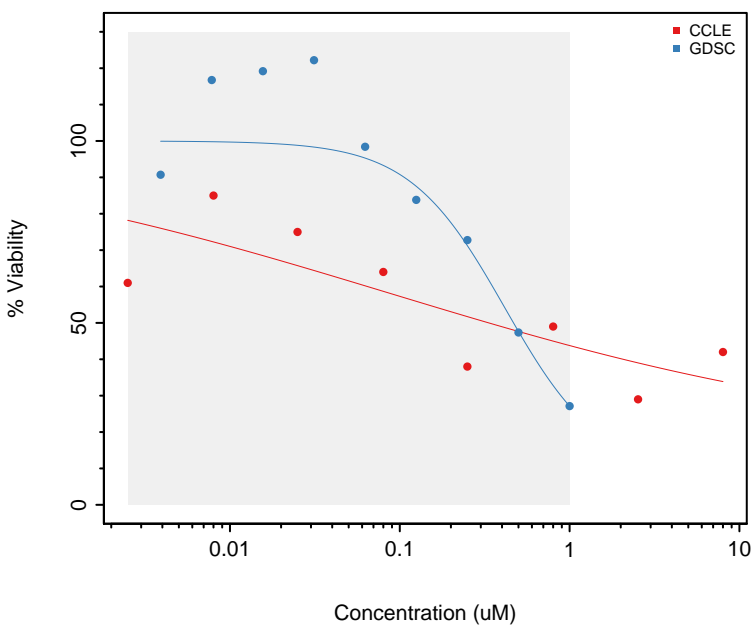

17-AAG:NCI-H1581

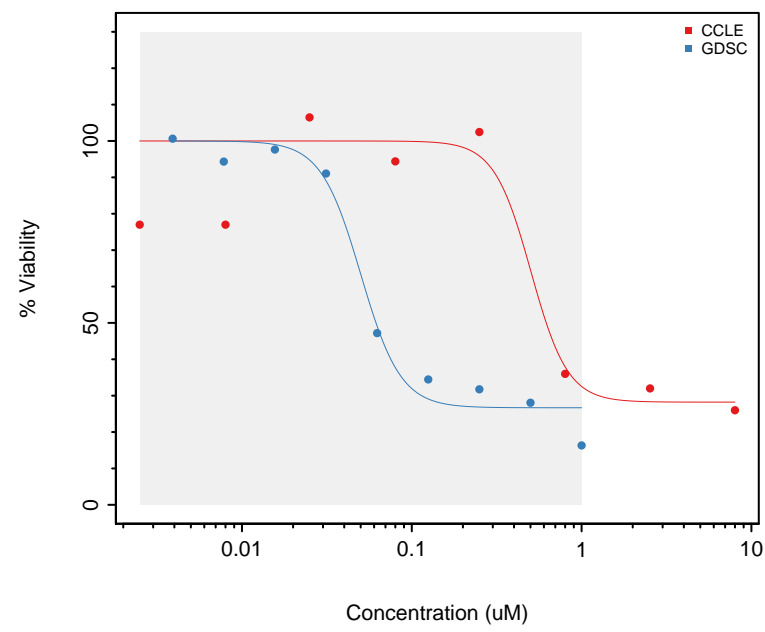

17-AAG:NCI-H1648

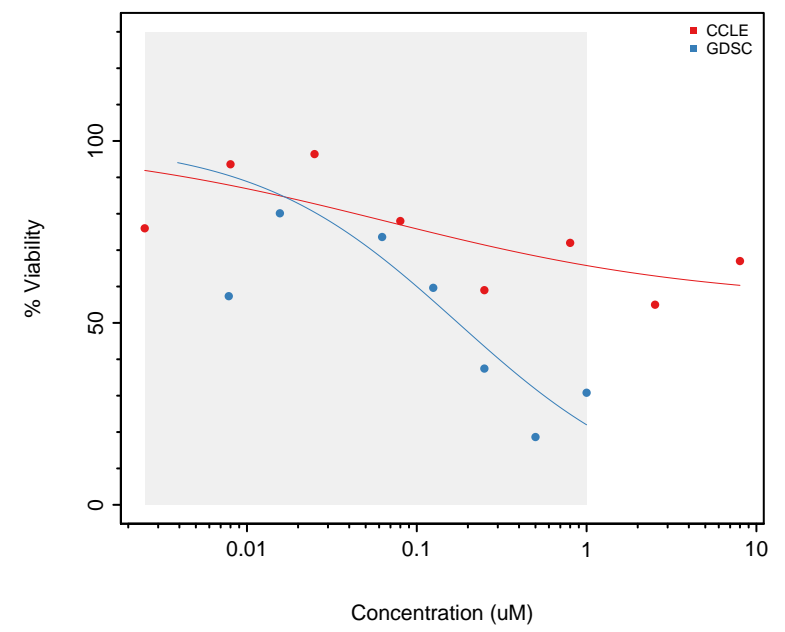

17-AAG:NCI-H1650

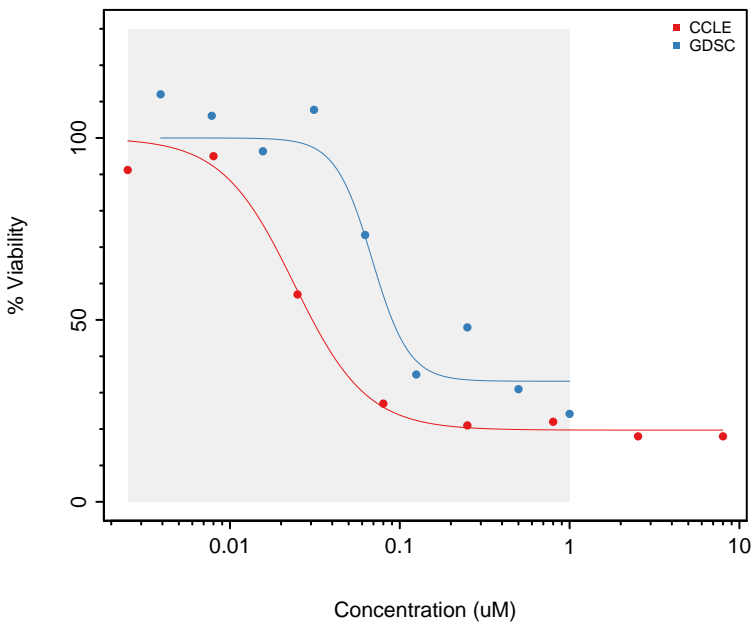

17-AAG:NCI-H1651

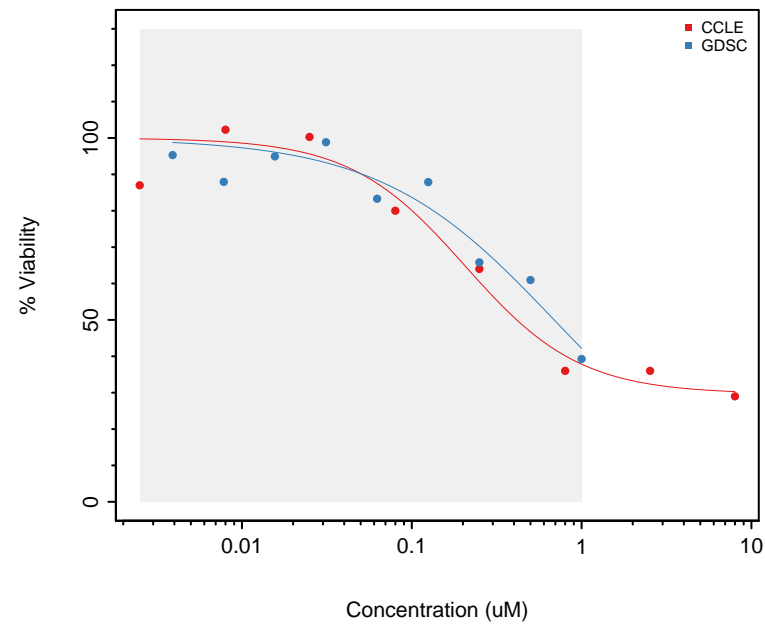

17-AAG:NCI-H1666

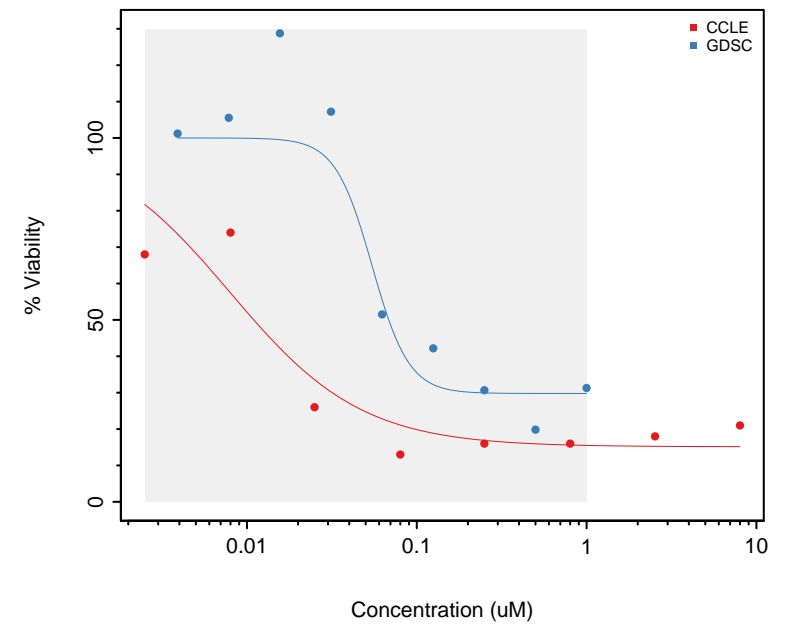

17-AAG:NCI-H1693

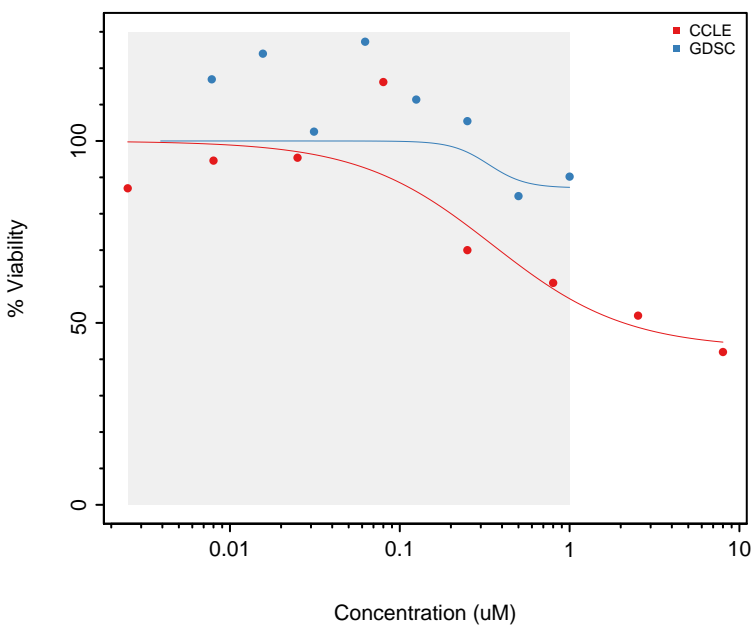

17-AAG:NCI-H1694

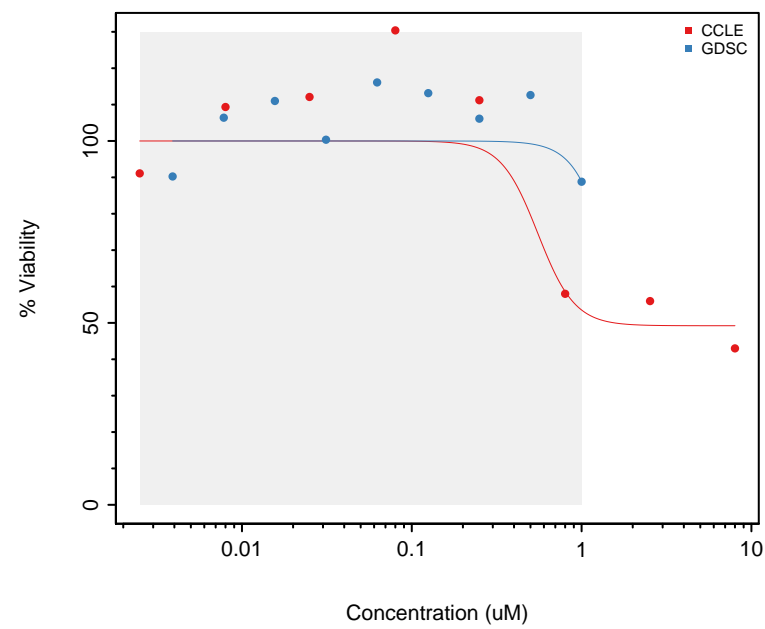

17-AAG:NCI-H1703

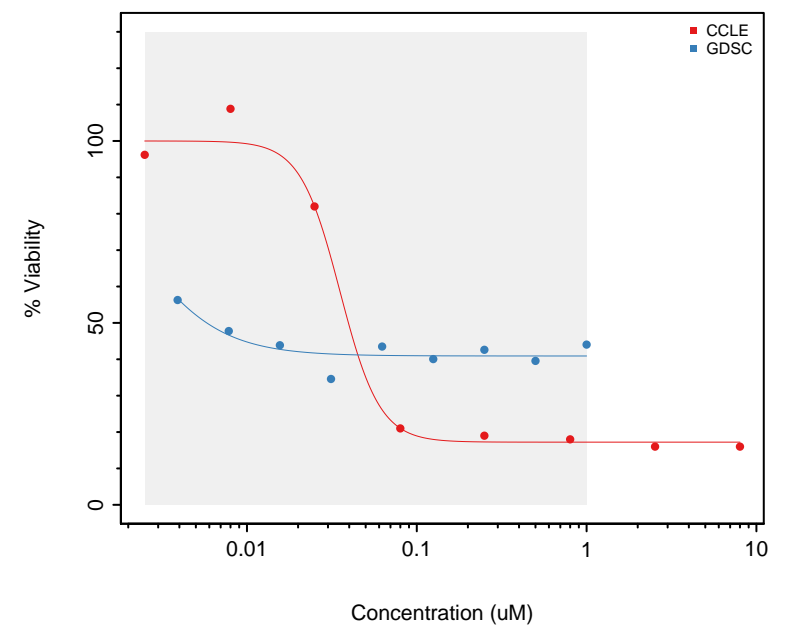

17-AAG:NCI-H1792

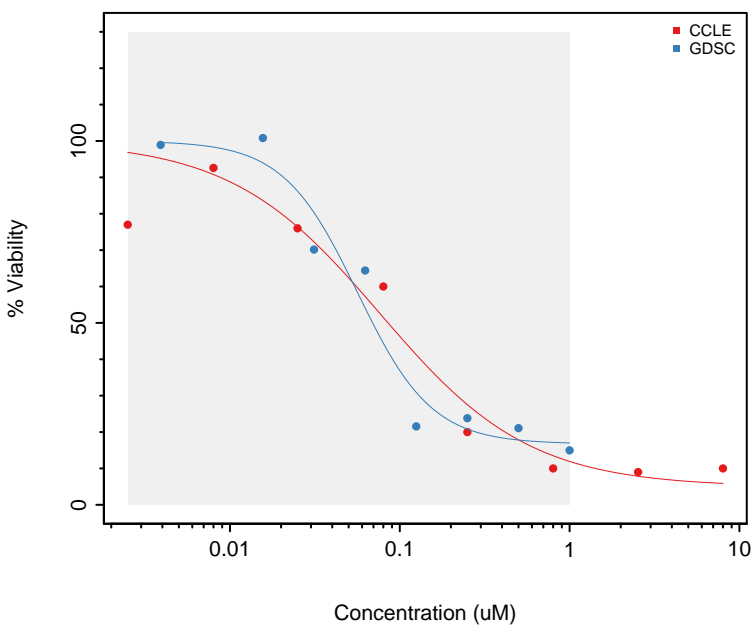

17-AAG:NCI-H1793

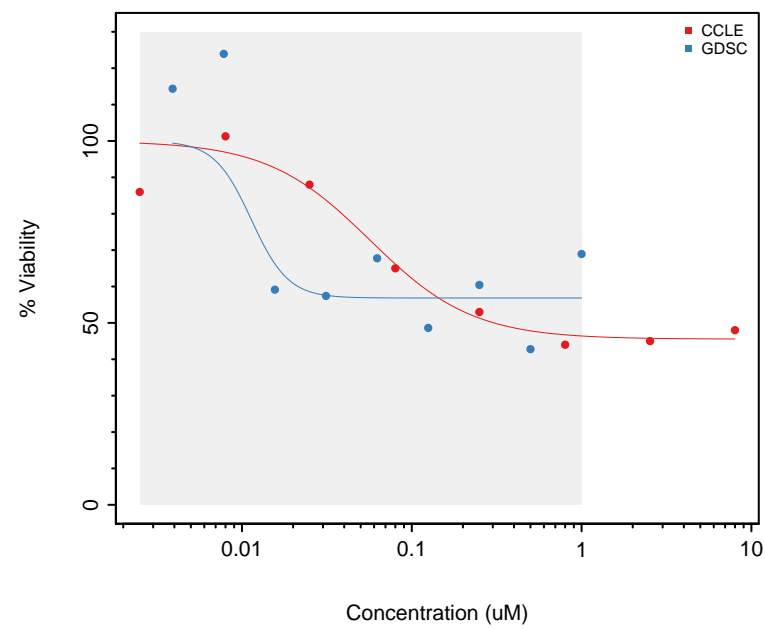

17-AAG:NCI-H1975

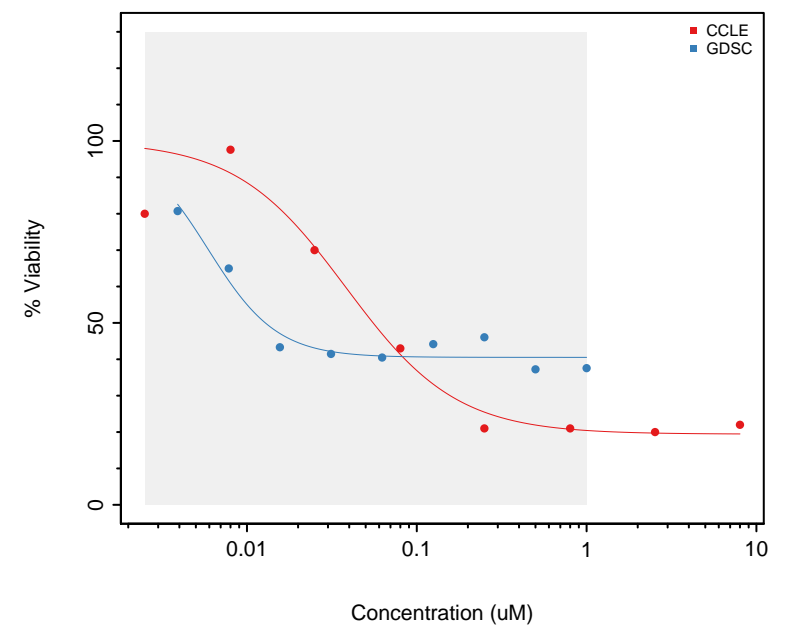







17-AAG:OC-314

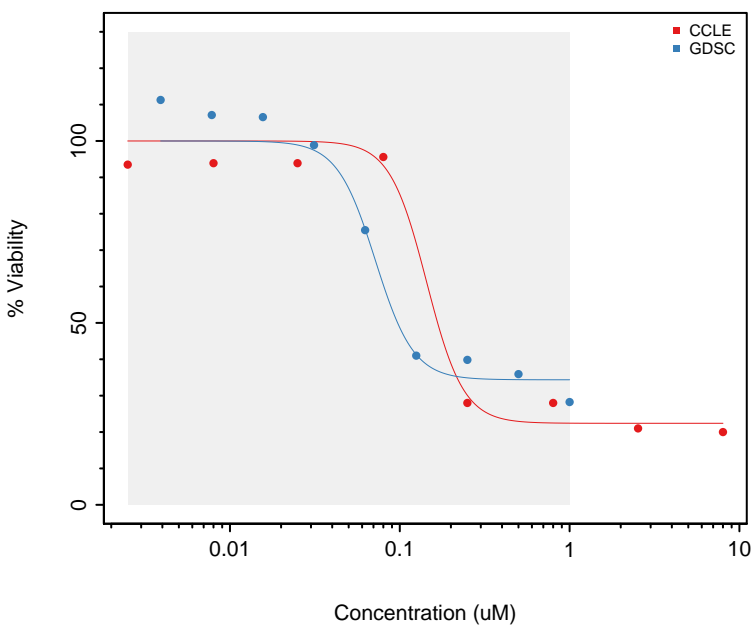

17-AAG:OCI-AML2

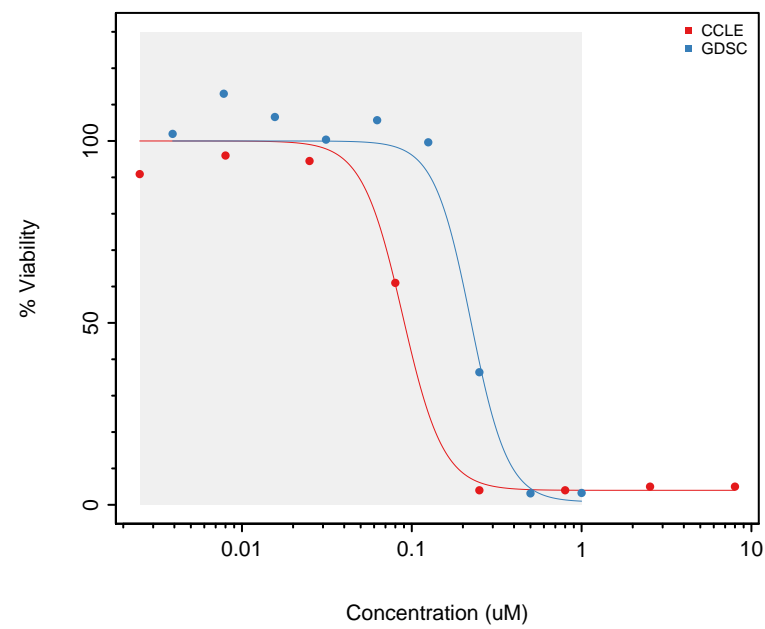

17-AAG:OE33

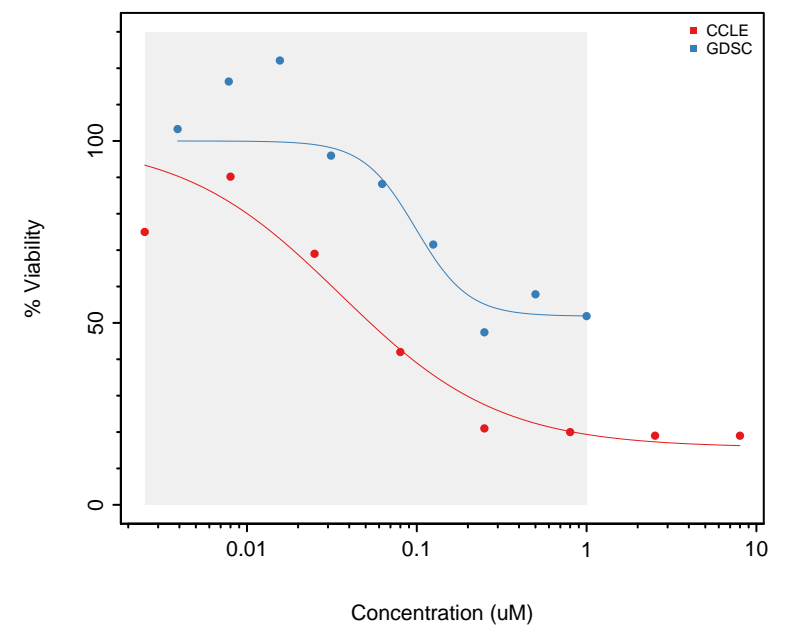

17-AAG:ONS-76

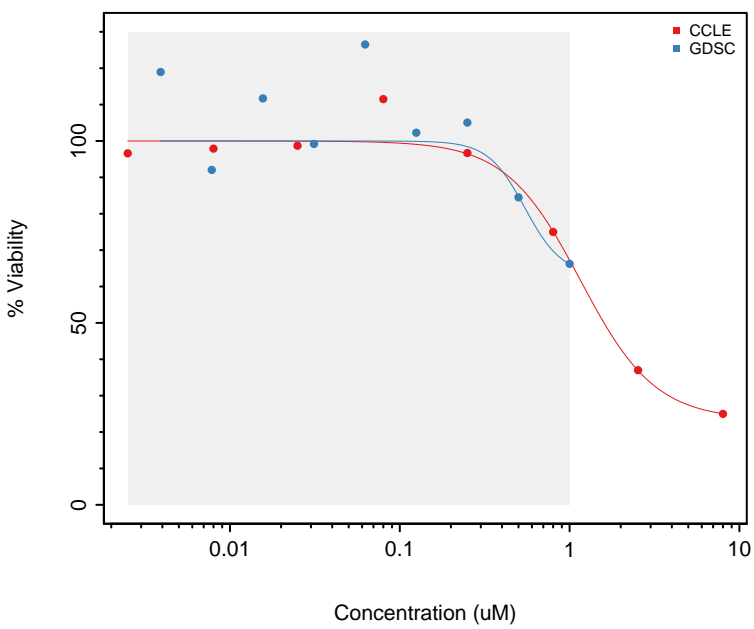

17-AAG:OPM-2

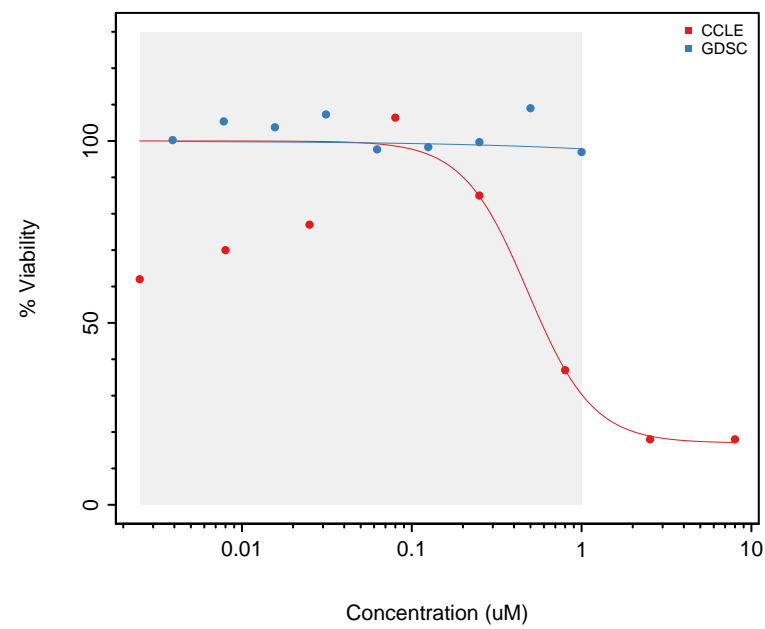

17-AAG:OVCAR-4

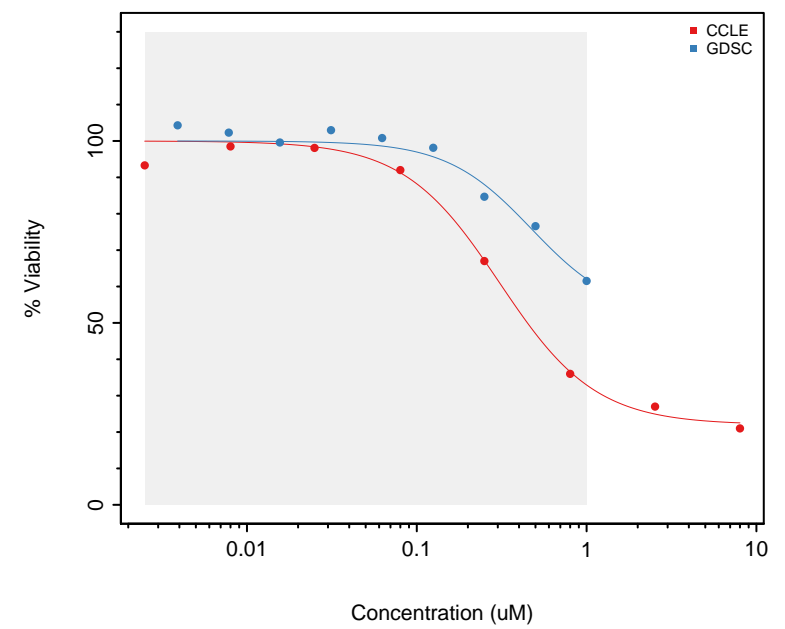

17-AAG:OVCAR-8

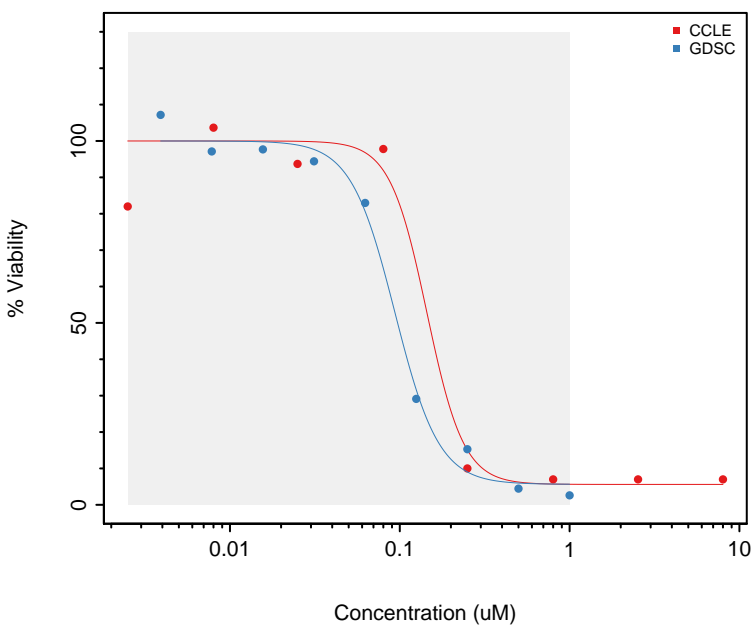

17-AAG:P12-ICHIKAWA

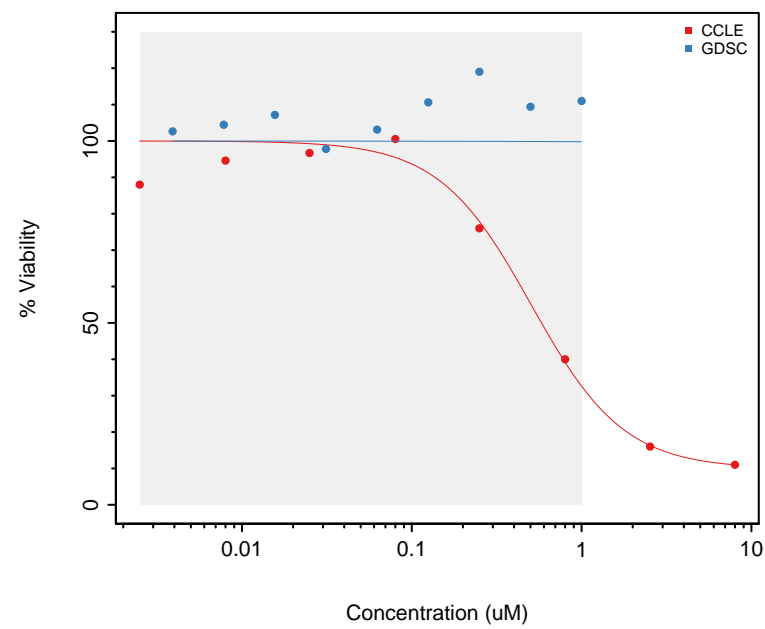

17-AAG:P31-FUJ

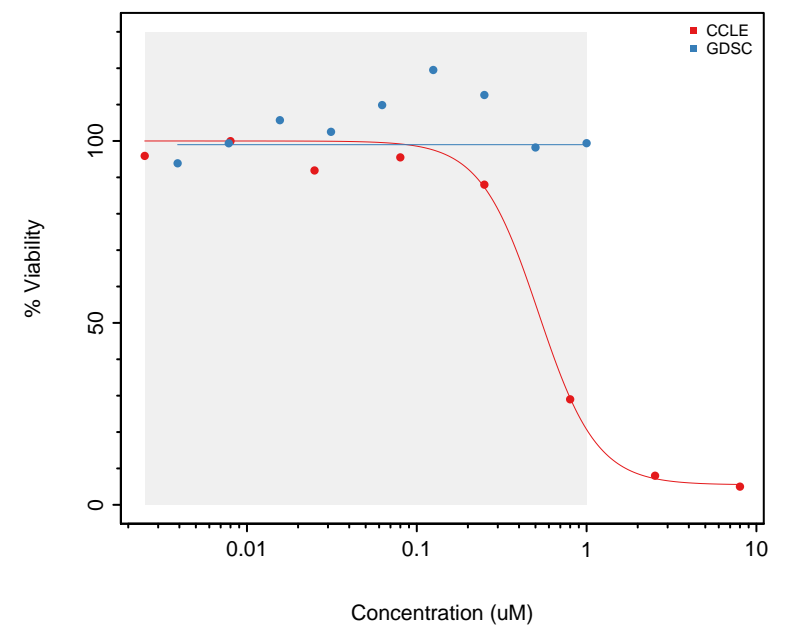

17-AAG:Panc 03.27

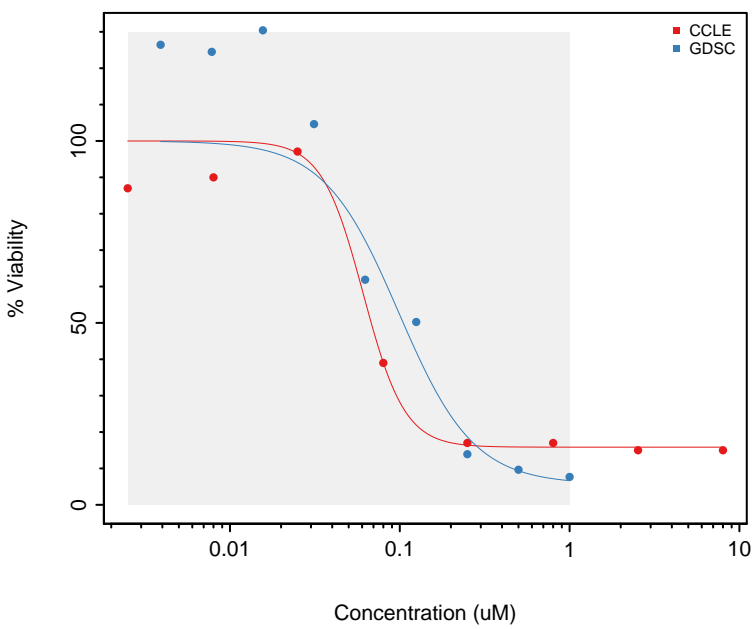

17-AAG:Panc 10.05

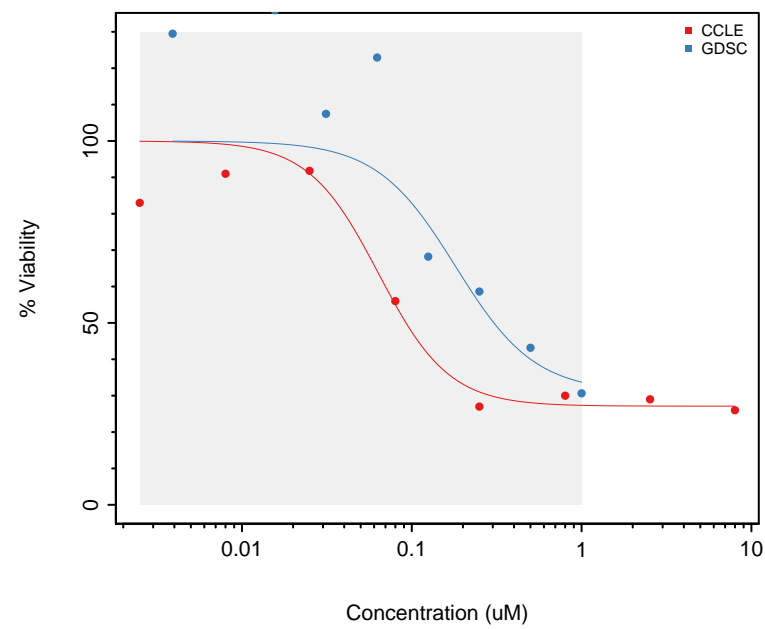

17-AAG:PC-14

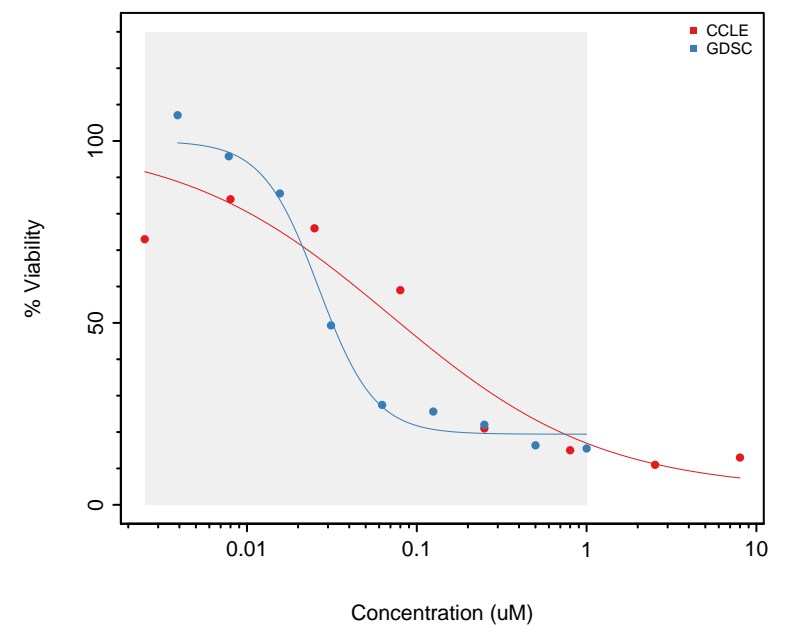

17-AAG:PC-3

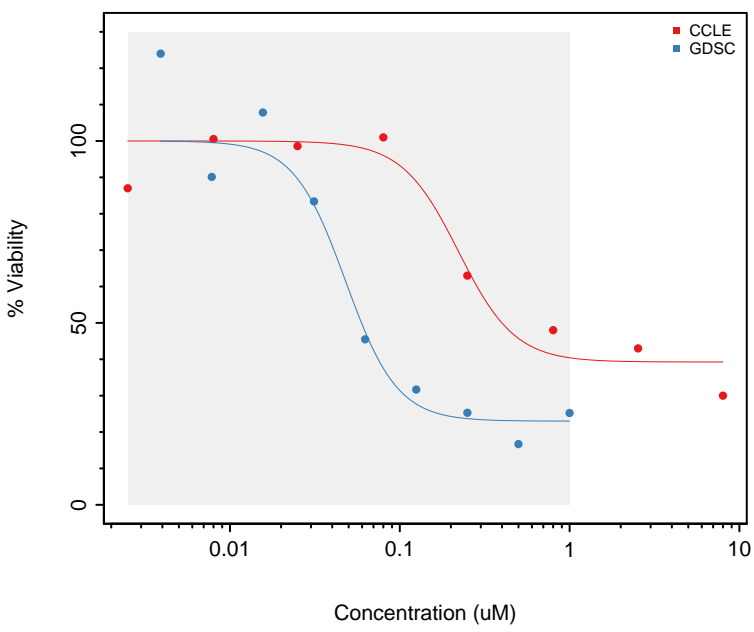

17-AAG:PSN1

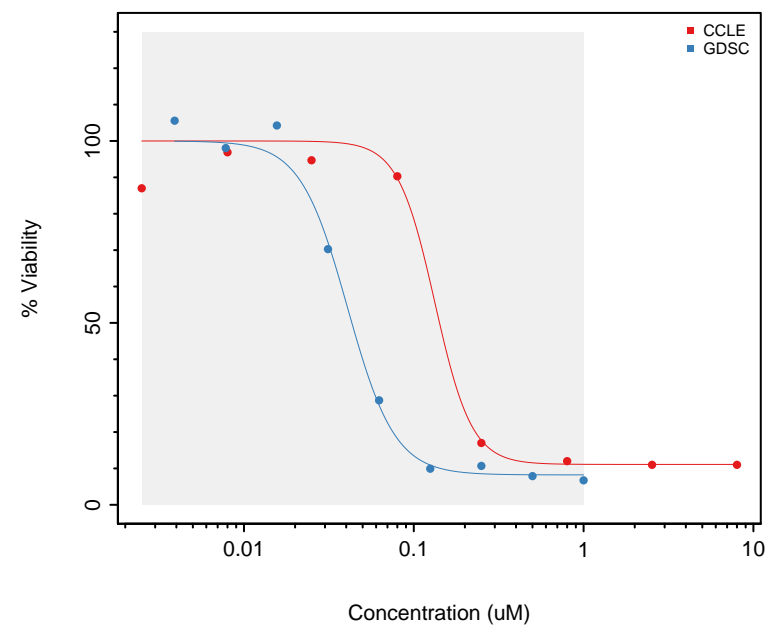

17-AAG:Raji

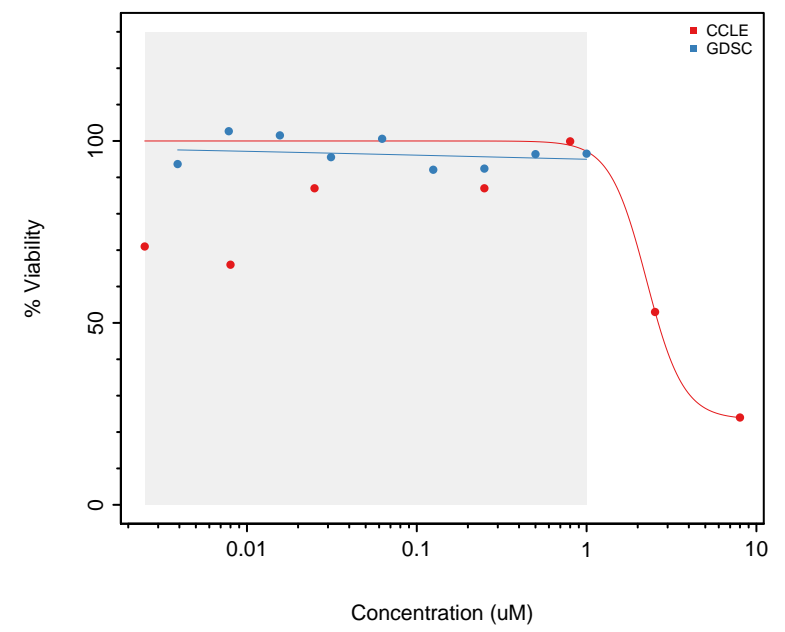

17-AAG:RD

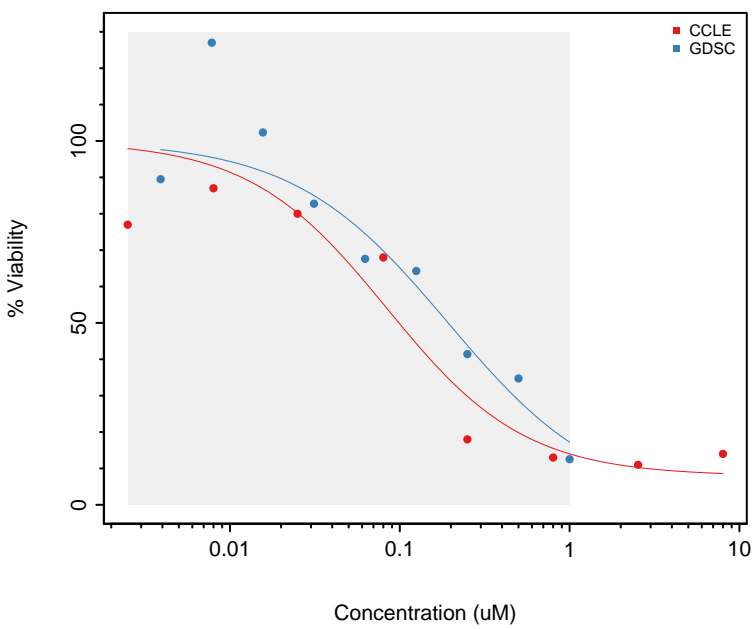

17-AAG:REH

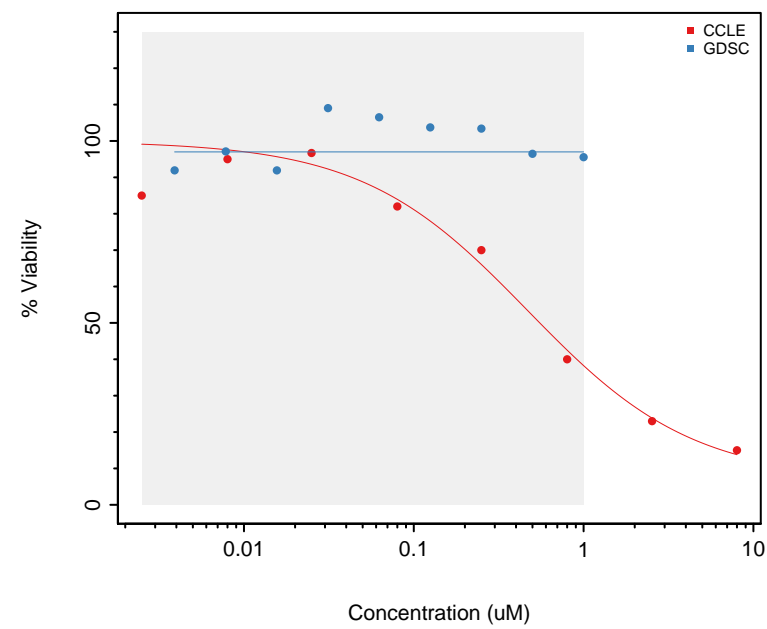

17-AAG:RERF-LC-MS

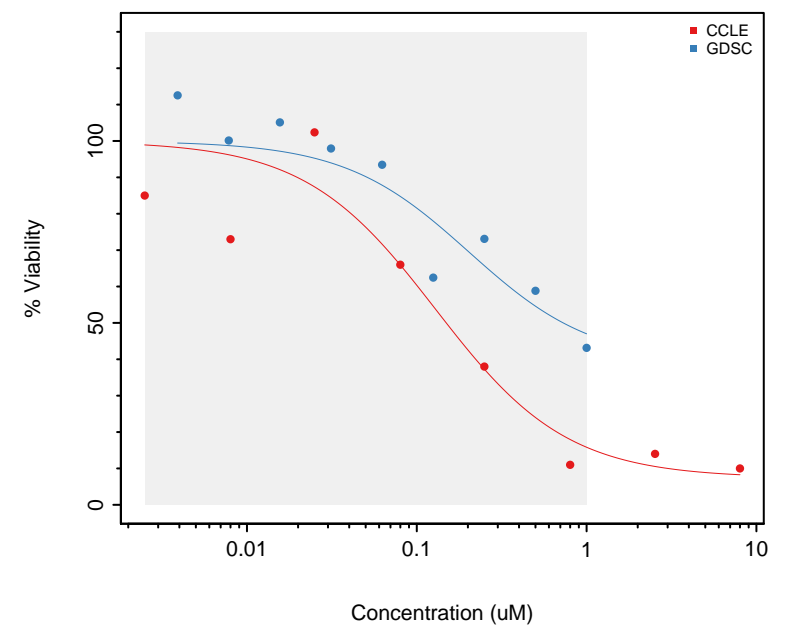

17-AAG:RKO

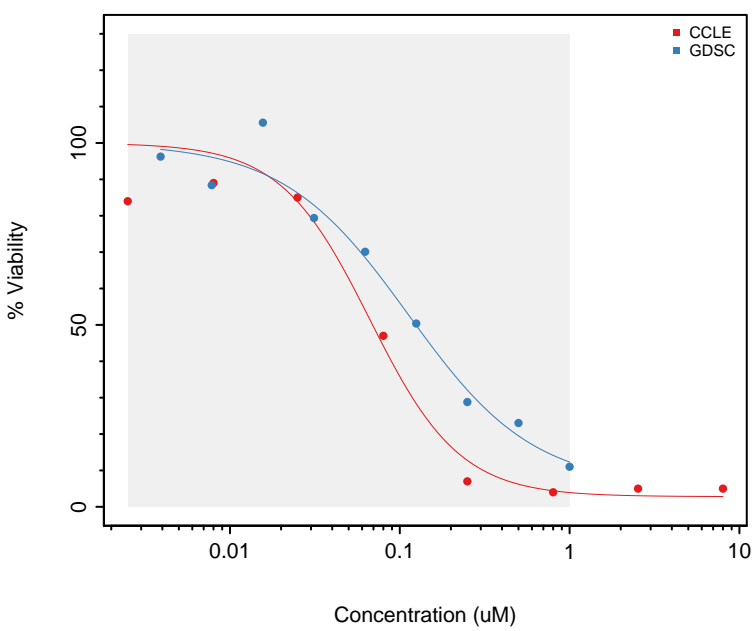

17-AAG:RL95-2

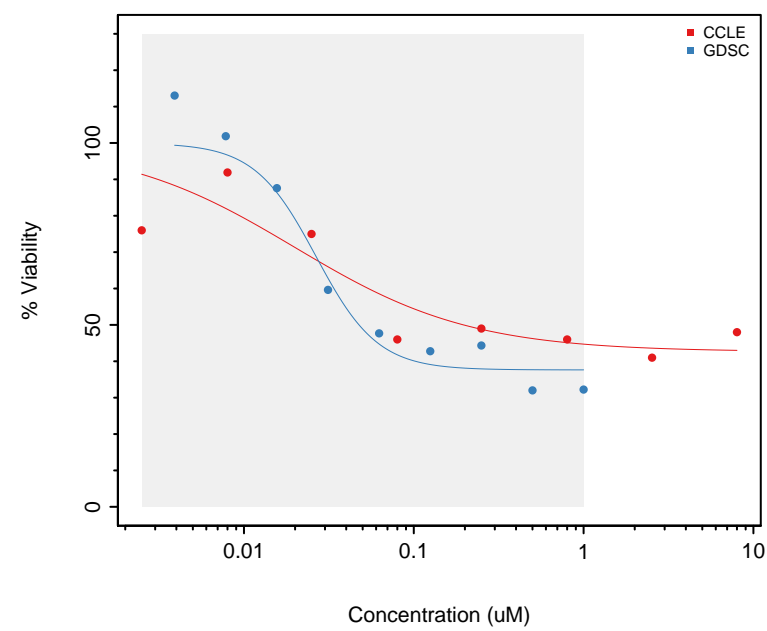

17-AAG:RPMI-7951

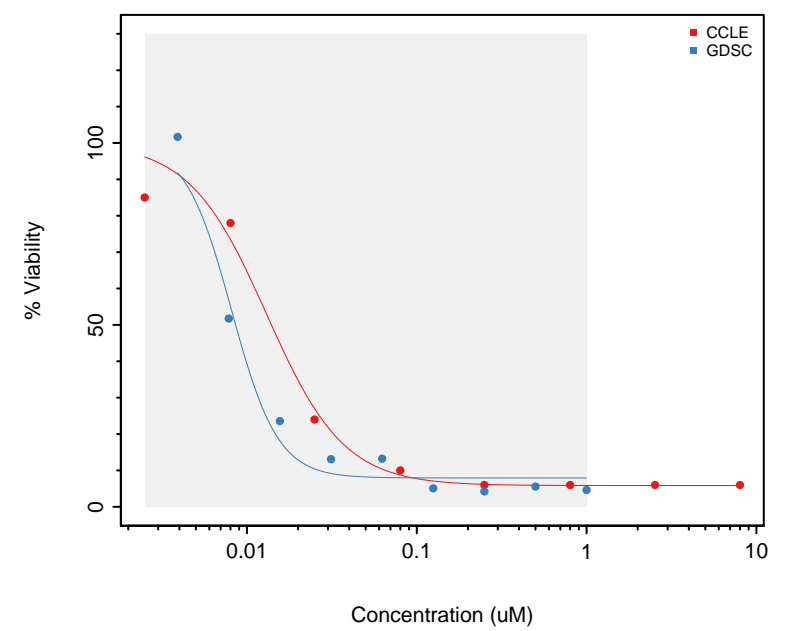

17-AAG:RPMI-8402

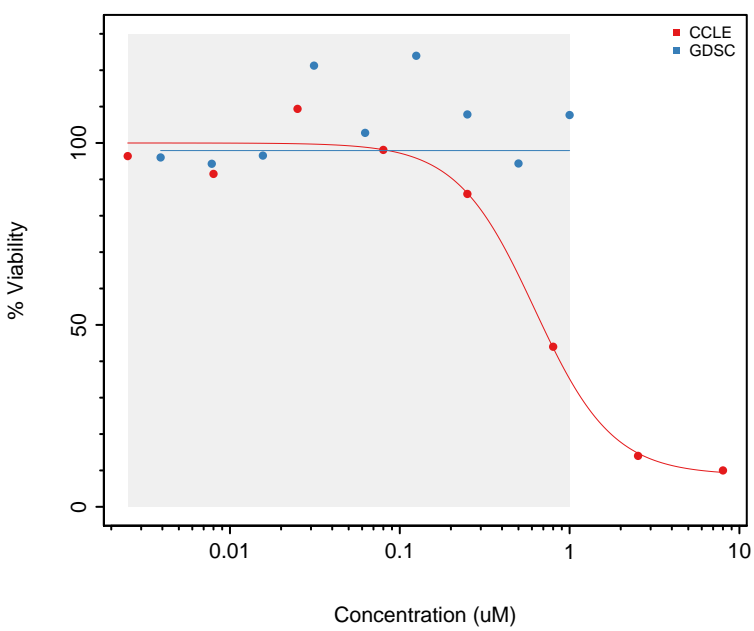

17-AAG:RT-112

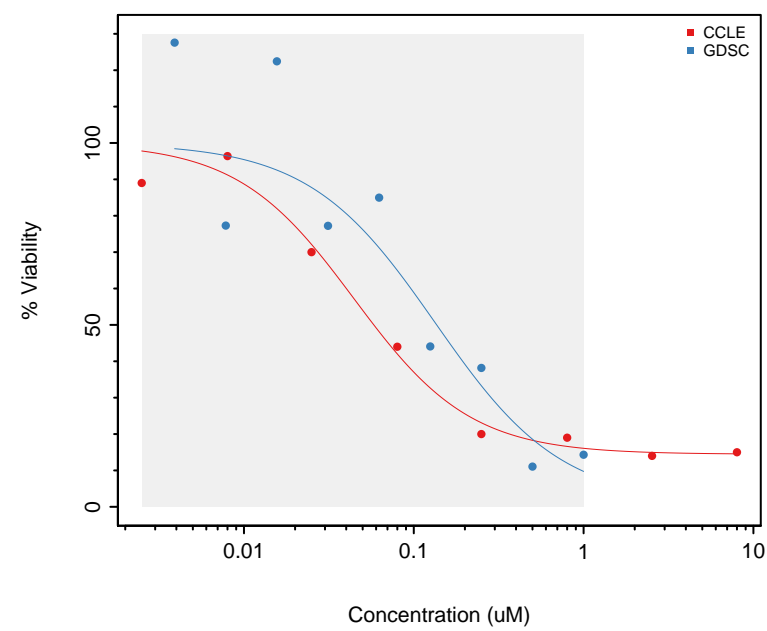

17-AAG:RT4

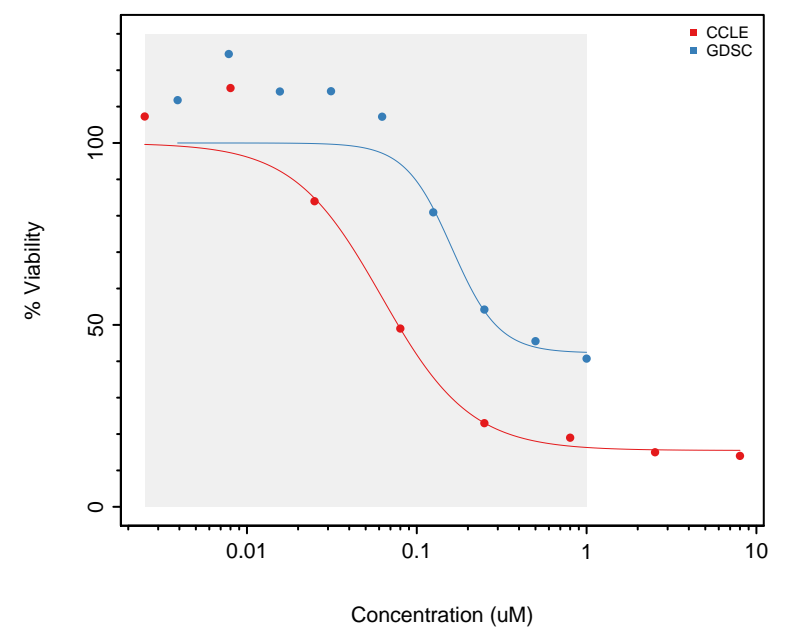



17-AAG:SK-HEP-1

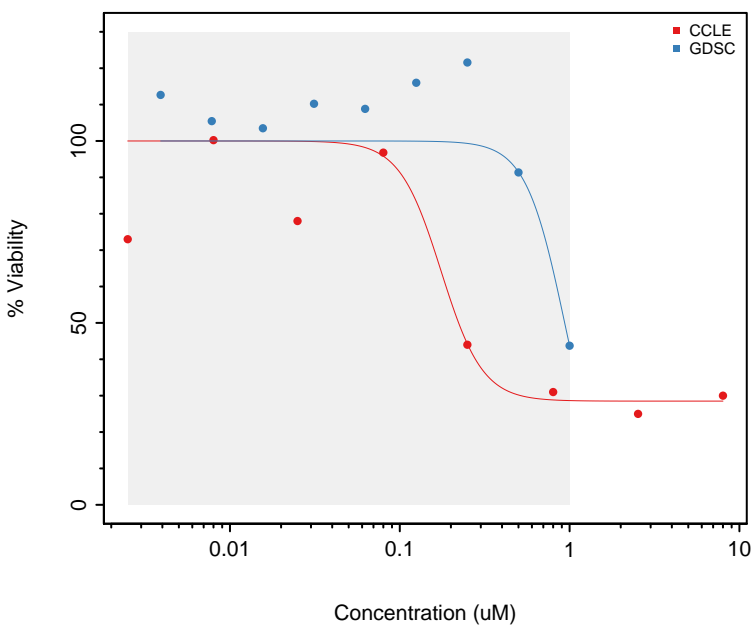

17-AAG:SK-LMS-1

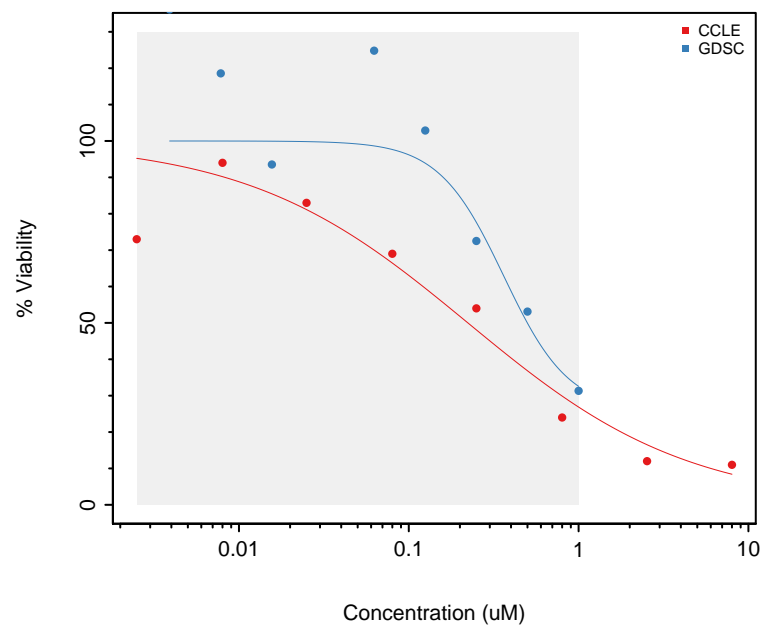

17-AAG:SK-LU-1

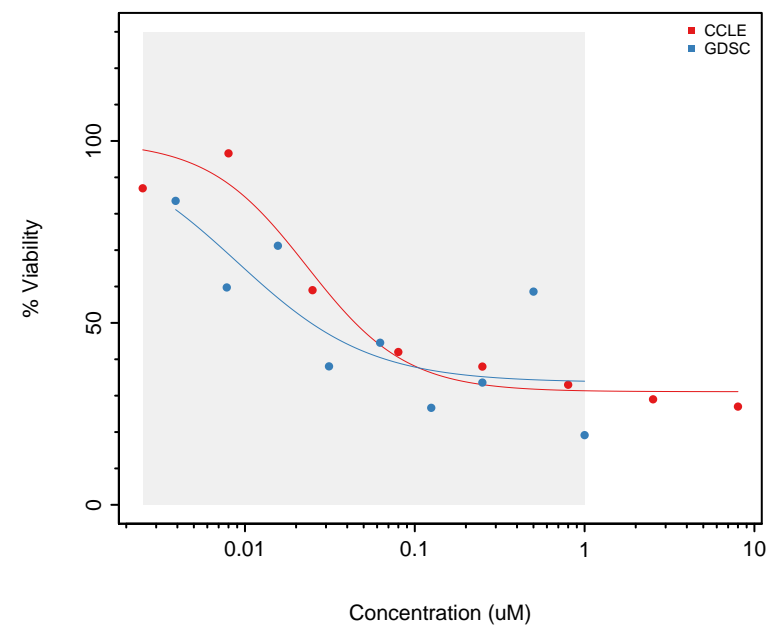

17-AAG:SK-MEL-2

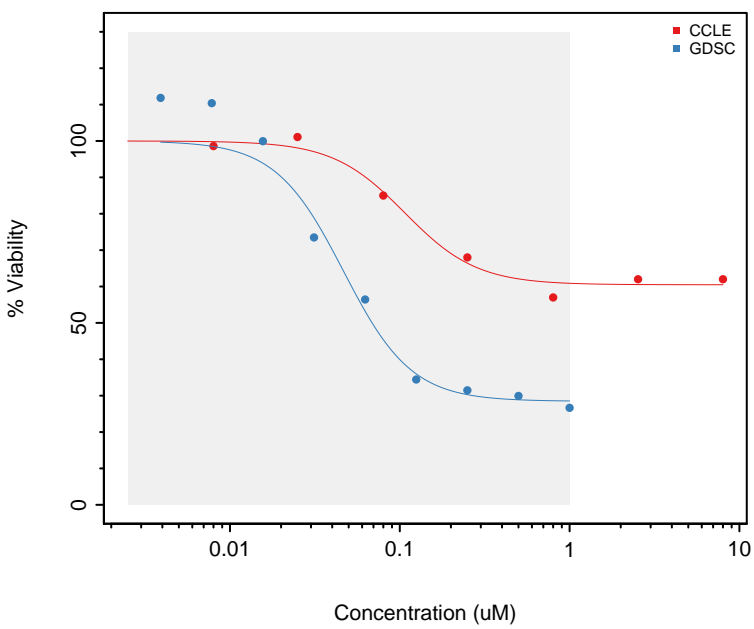

17-AAG:SK-MEL-24

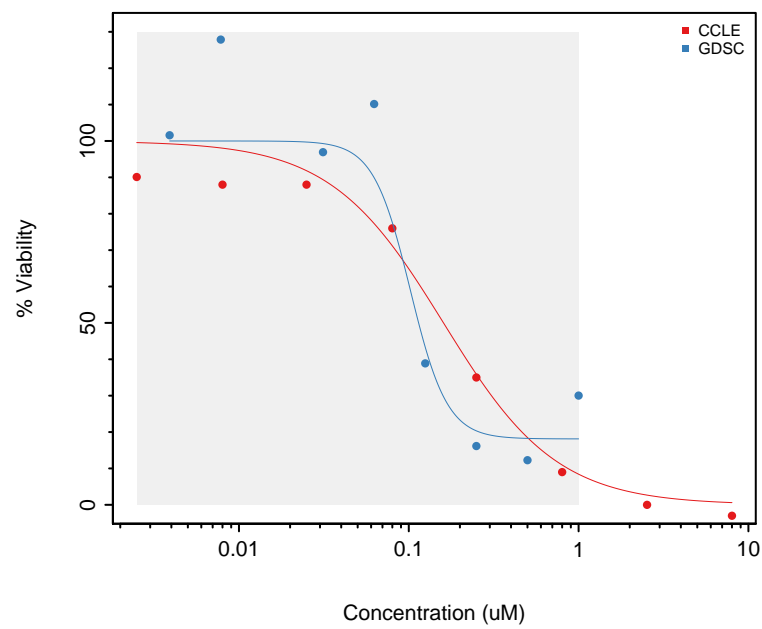

17-AAG:SK-MEL-30

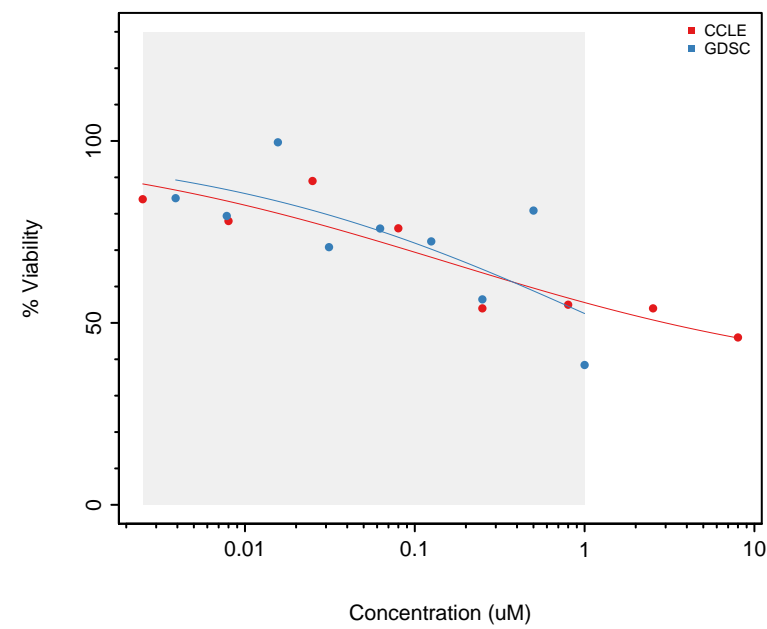

17-AAG:SK-MEL-5

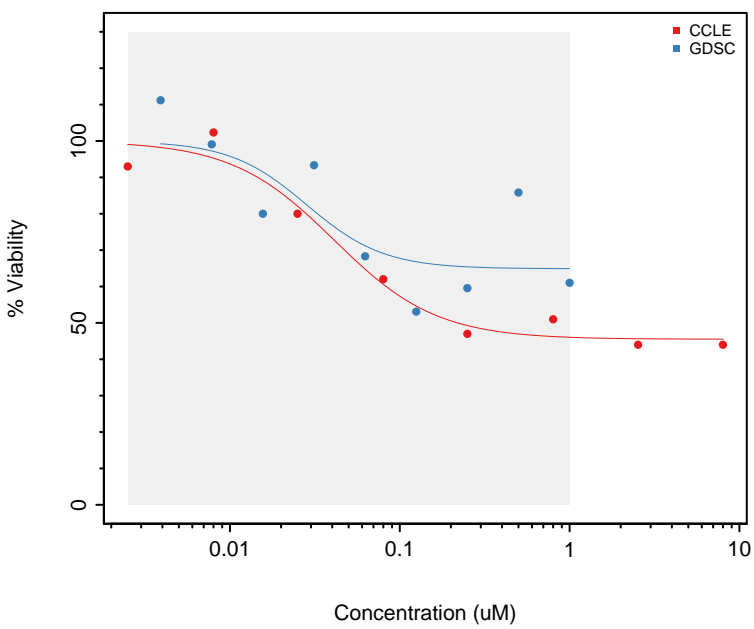

17-AAG:SK-MES-1

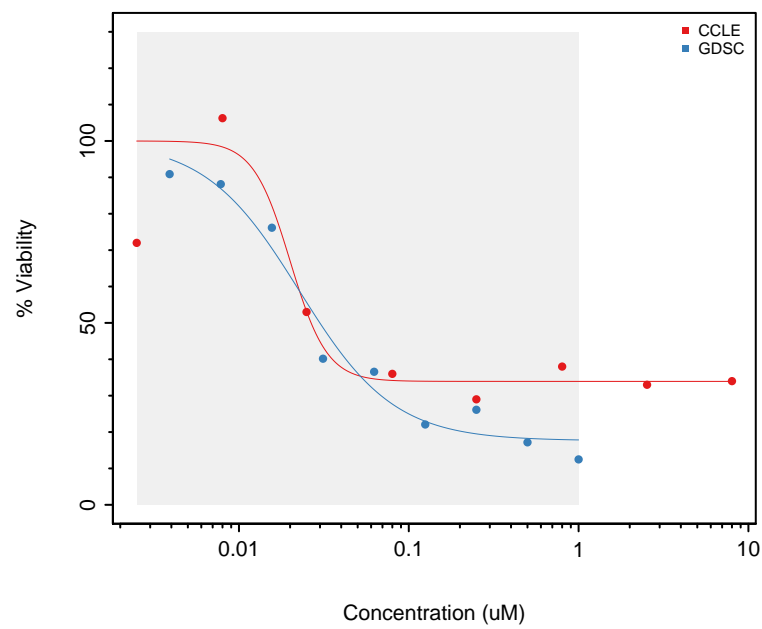

17-AAG:SK-MM-2

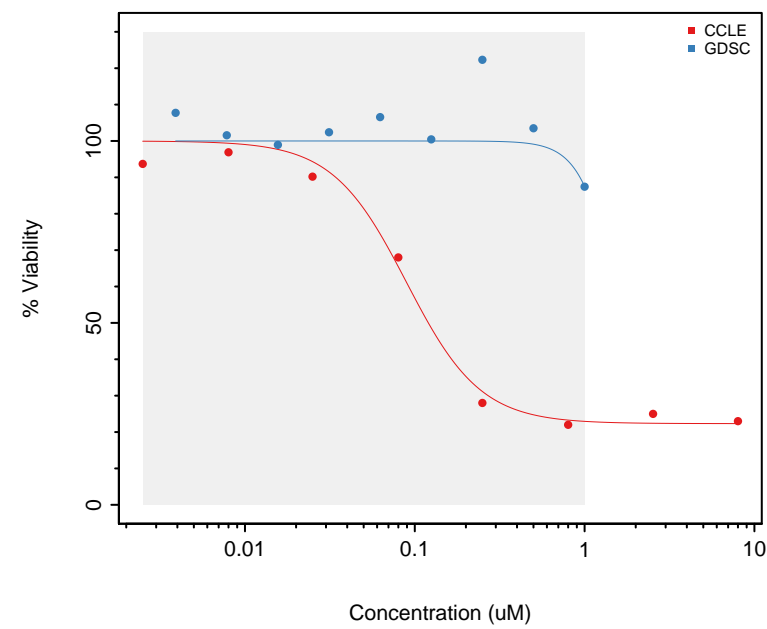

17-AAG:SK-N-AS

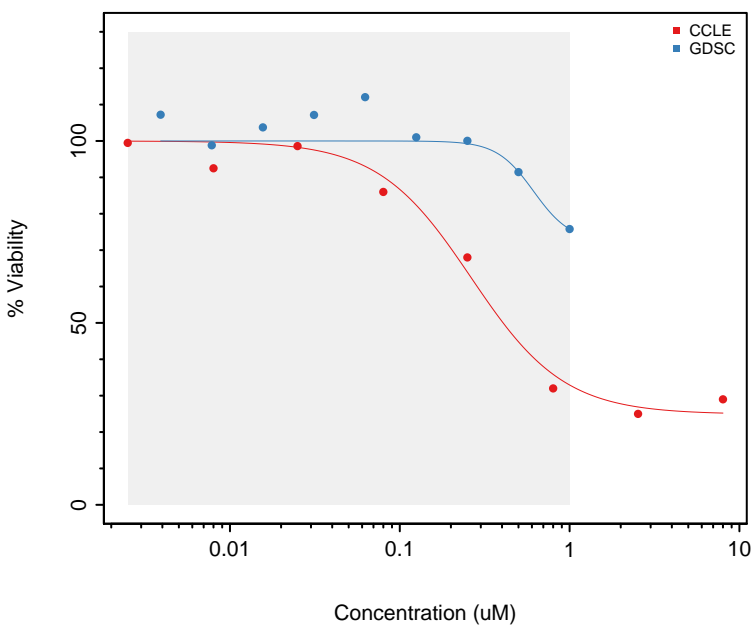

17-AAG:SK-N-FI

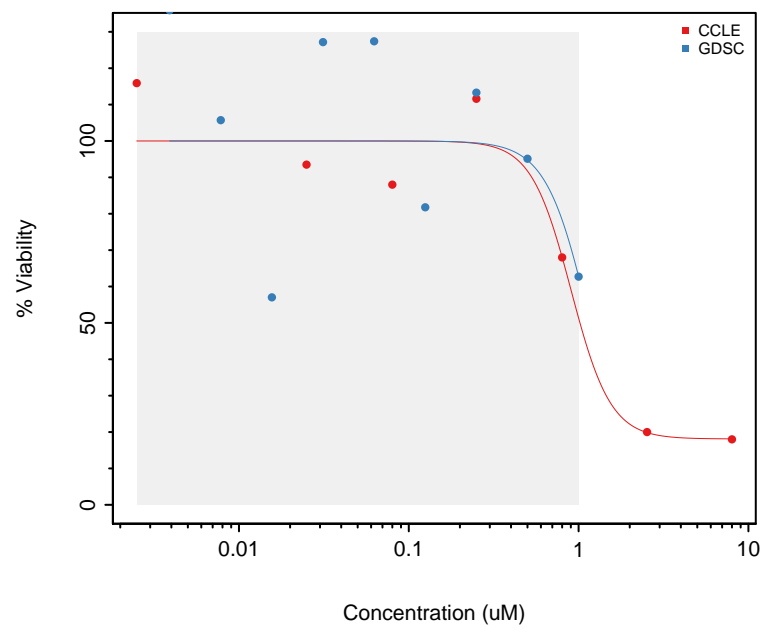

17-AAG:SK-OV-3

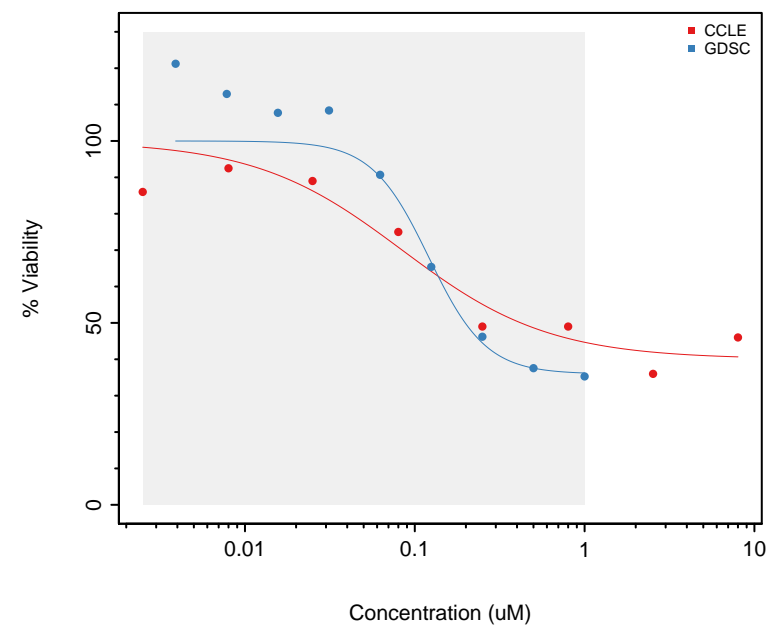



17-AAG:SW48

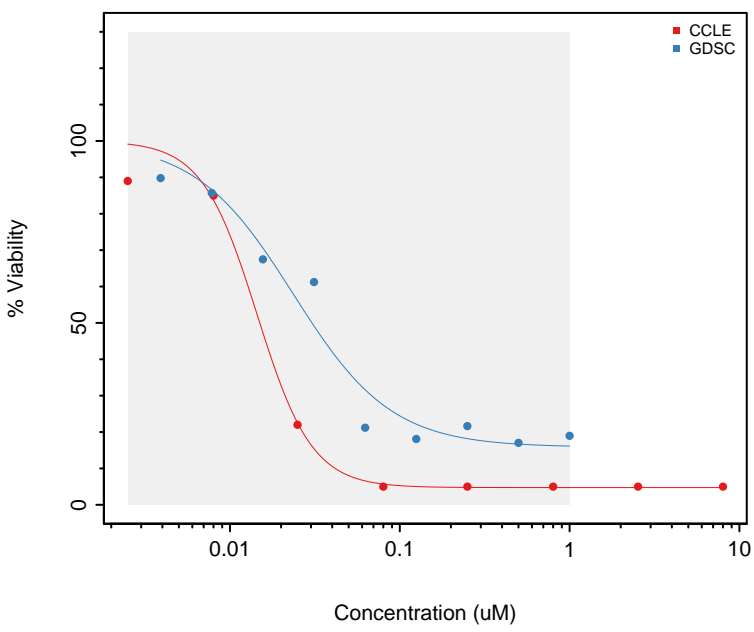

17-AAG:SW620

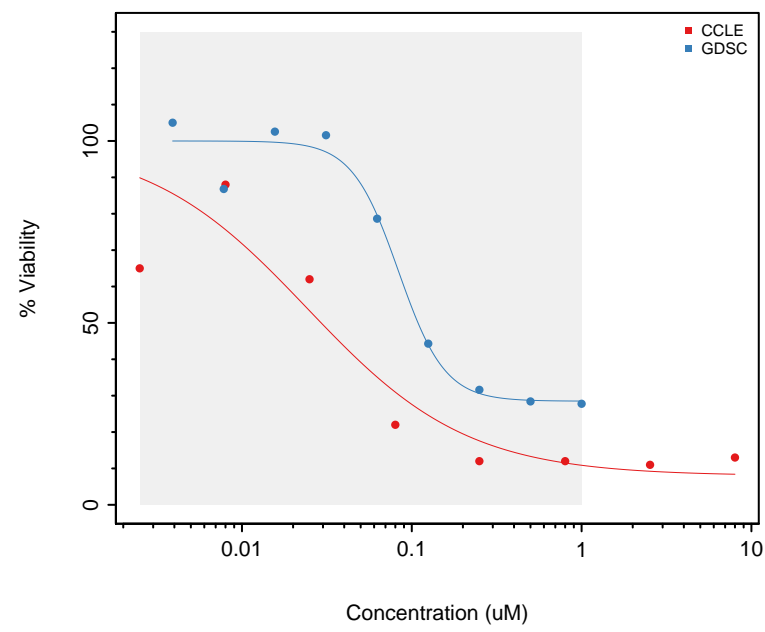

17-AAG:SW780

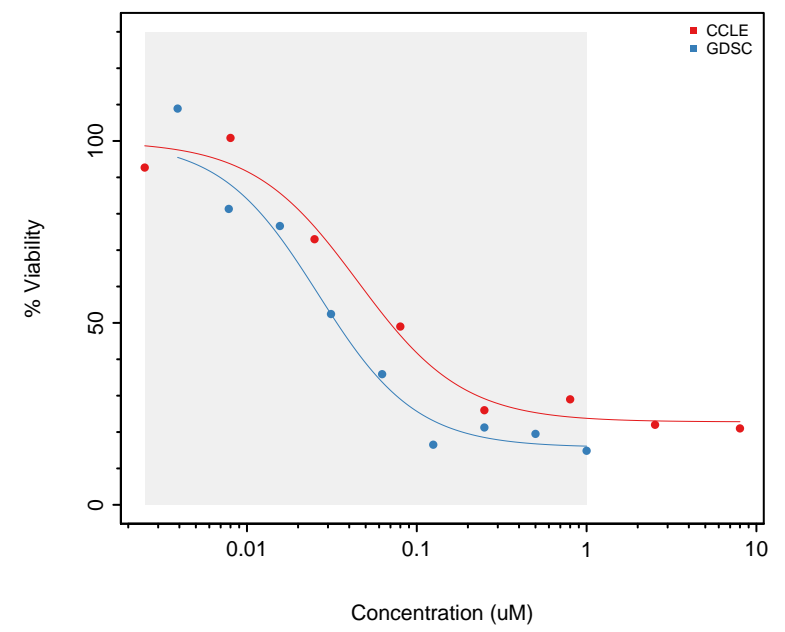

17-AAG:SW900

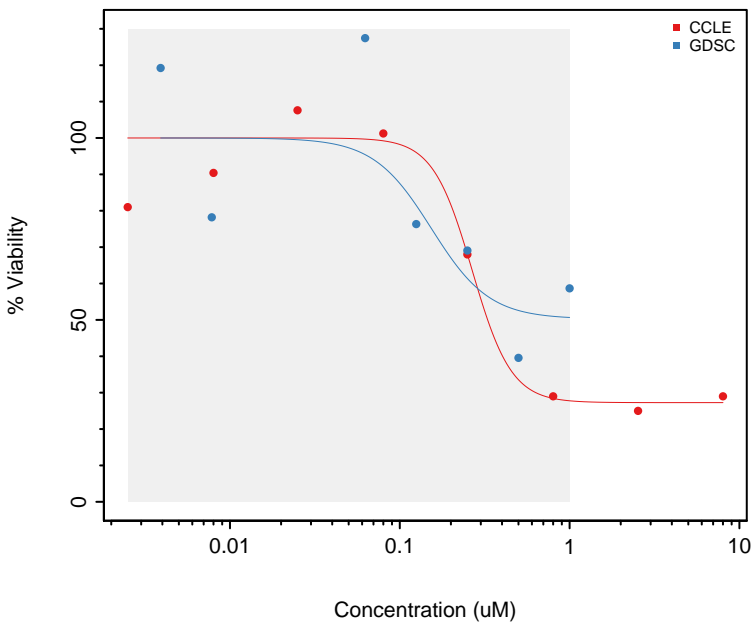

17-AAG:T-24

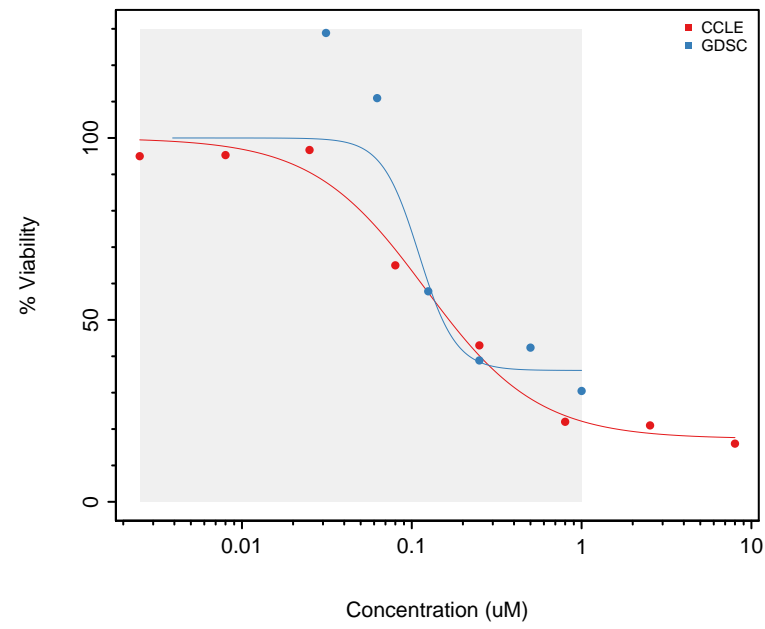

17-AAG:T47D

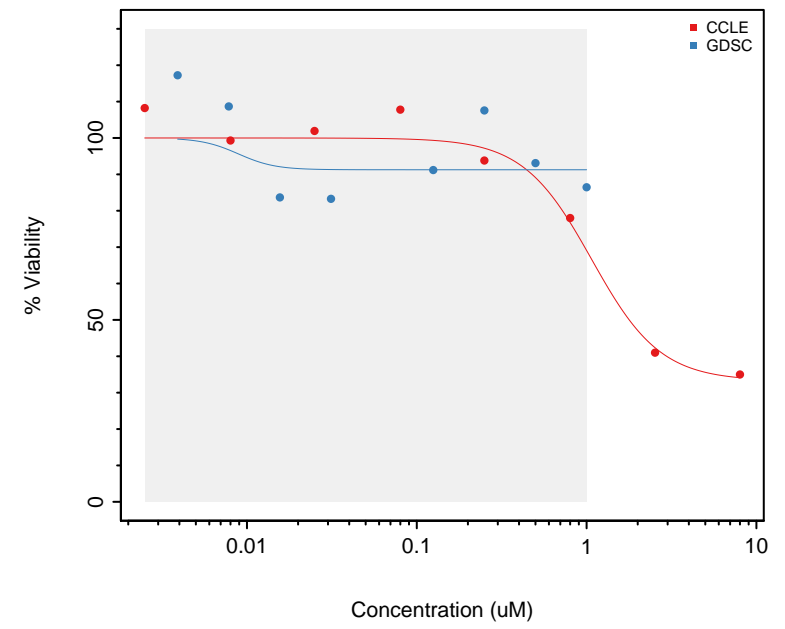

17-AAG:T84

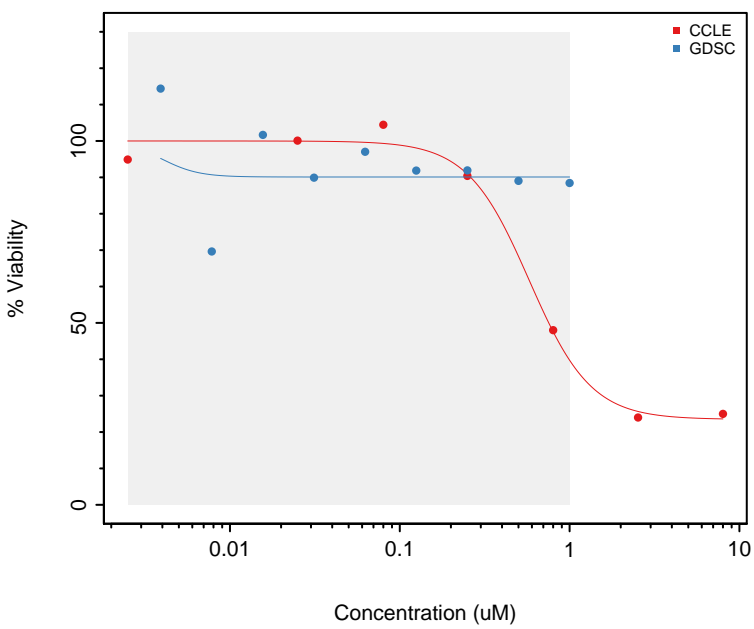

17-AAG:T98G

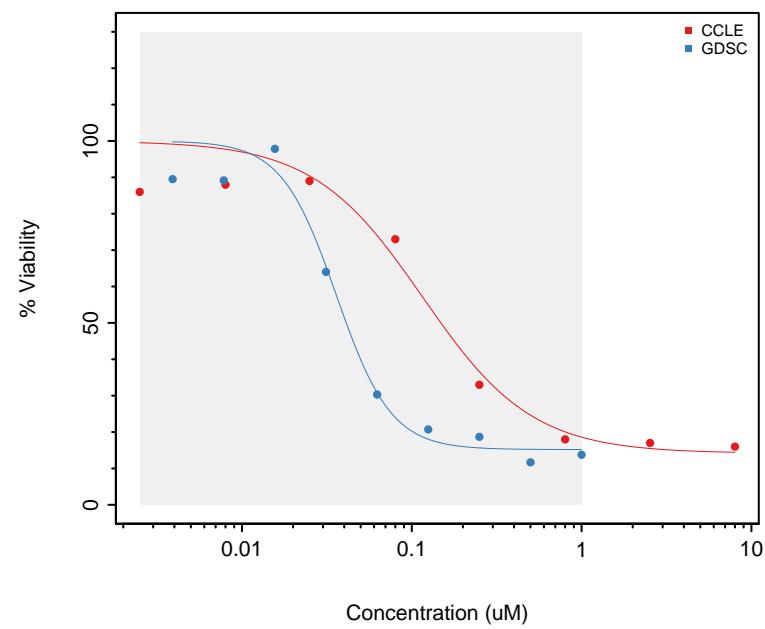

17-AAG:TCCSUP

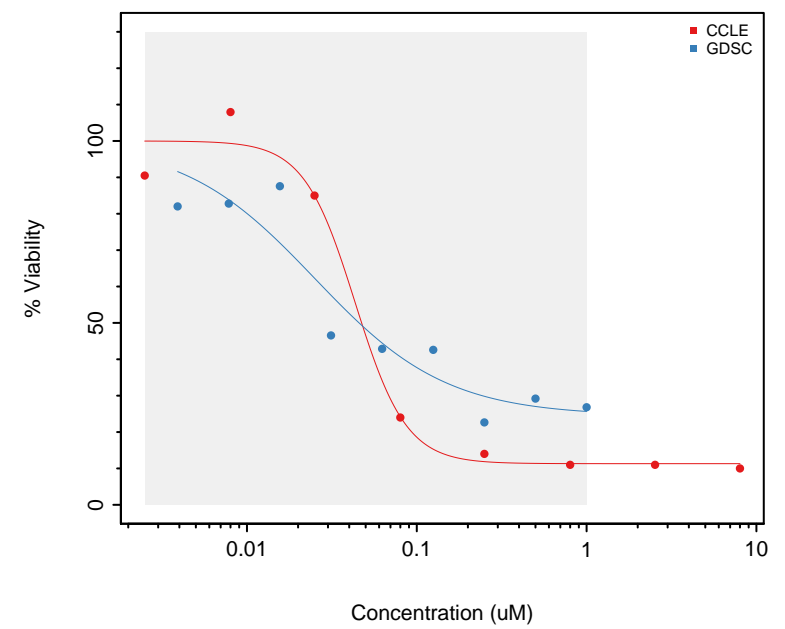

17-AAG:TE-1

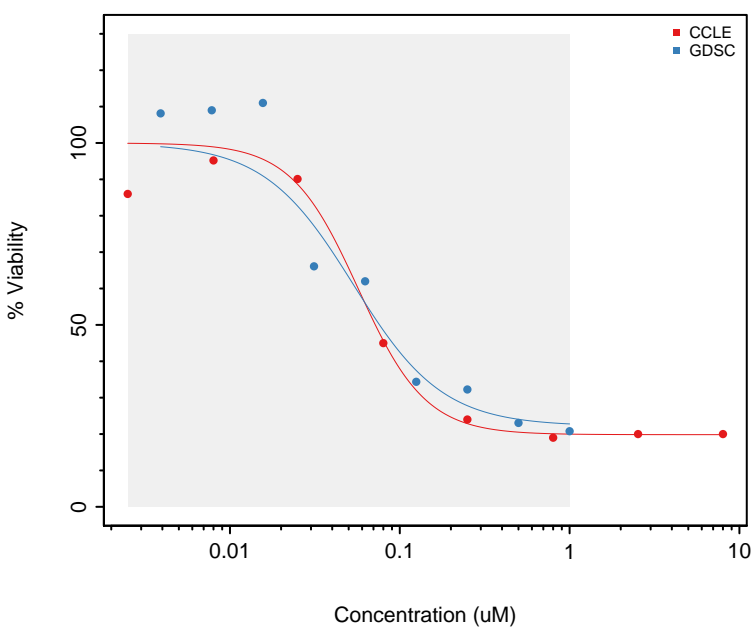

17-AAG:TE-11

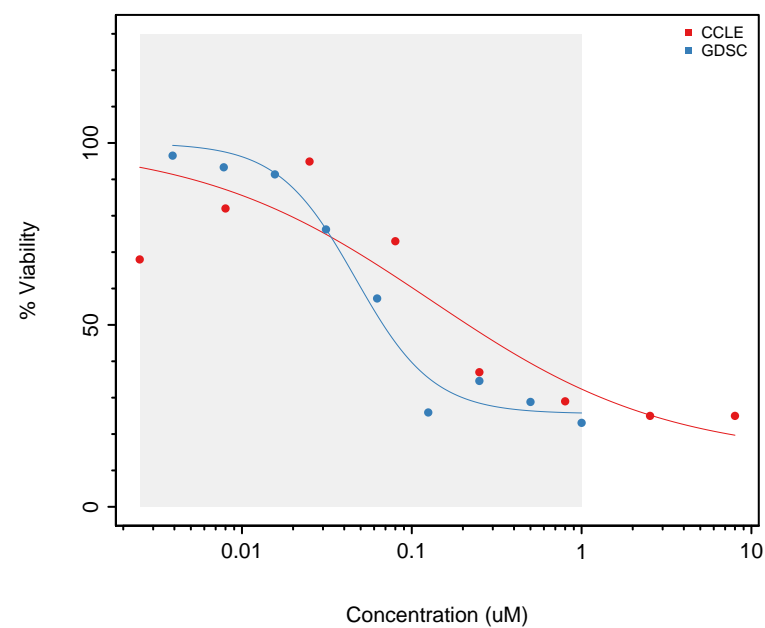

17-AAG:TE-15

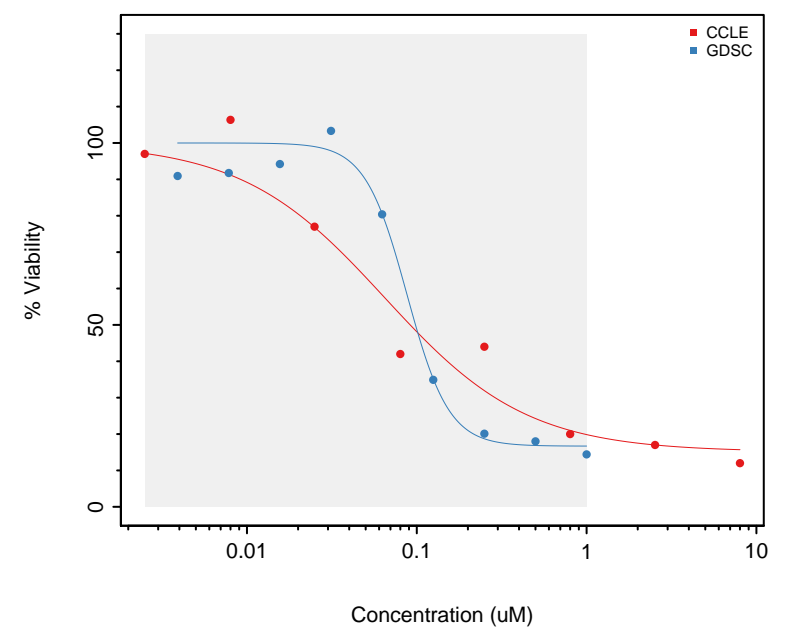





17-AAG:ZR-75-30

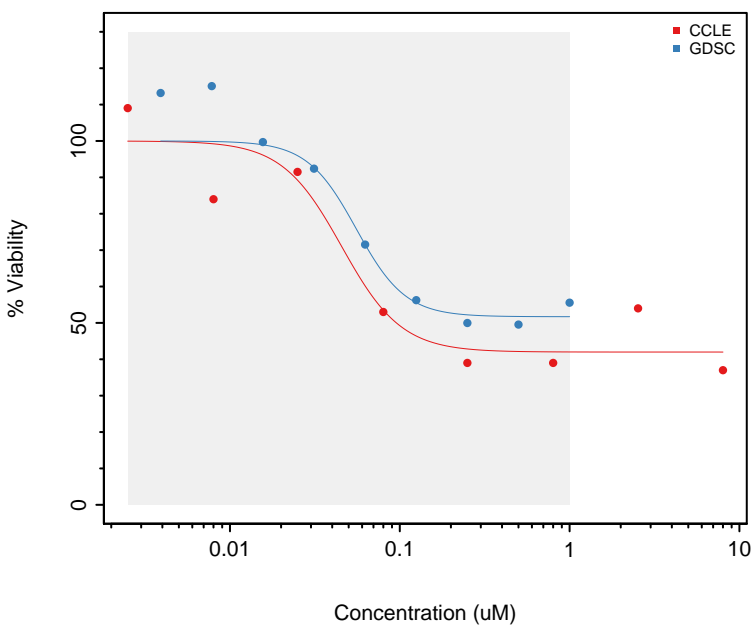

PHA-665752:697

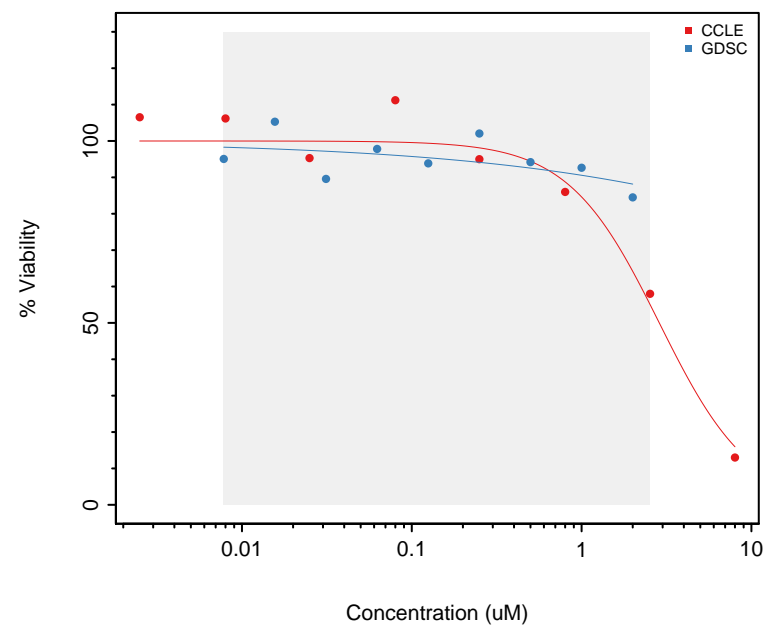

PHA-665752:8-MG-BA

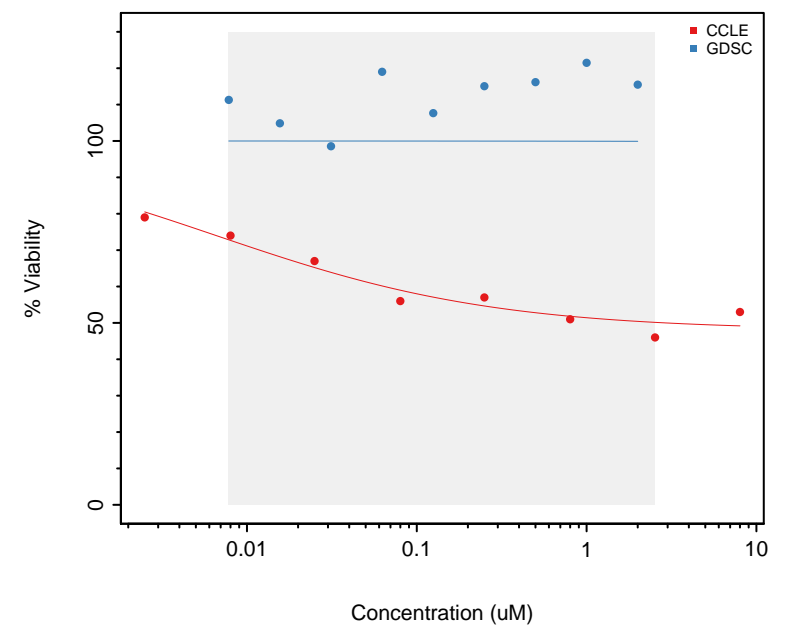

PHA-665752:A253

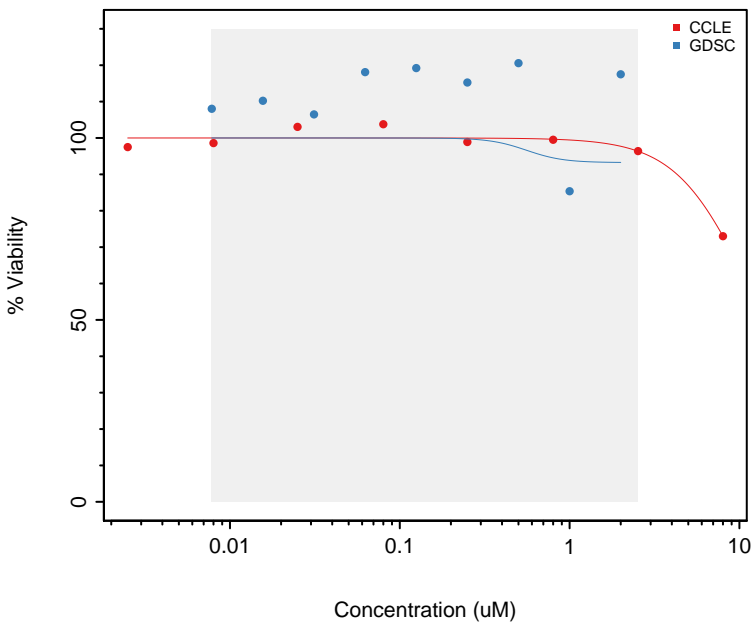

PHA-665752:BL-41

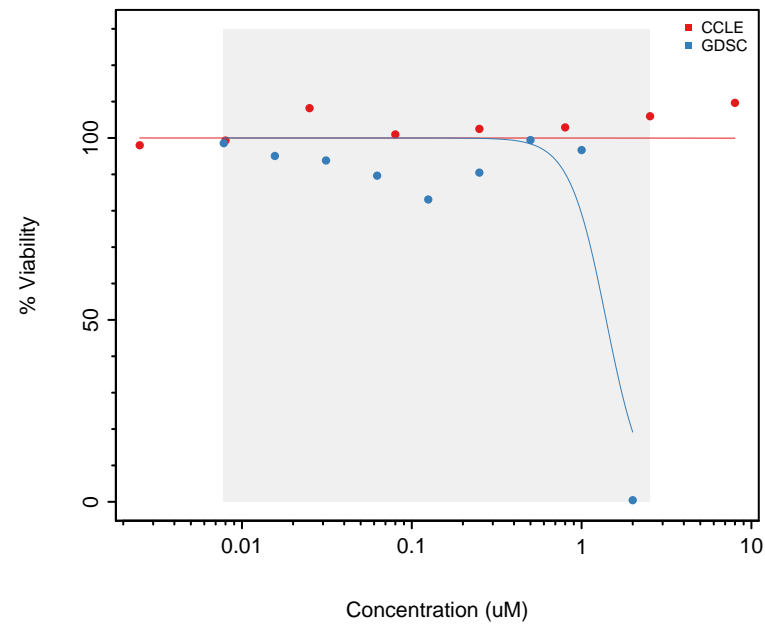

PHA-665752:BL-70

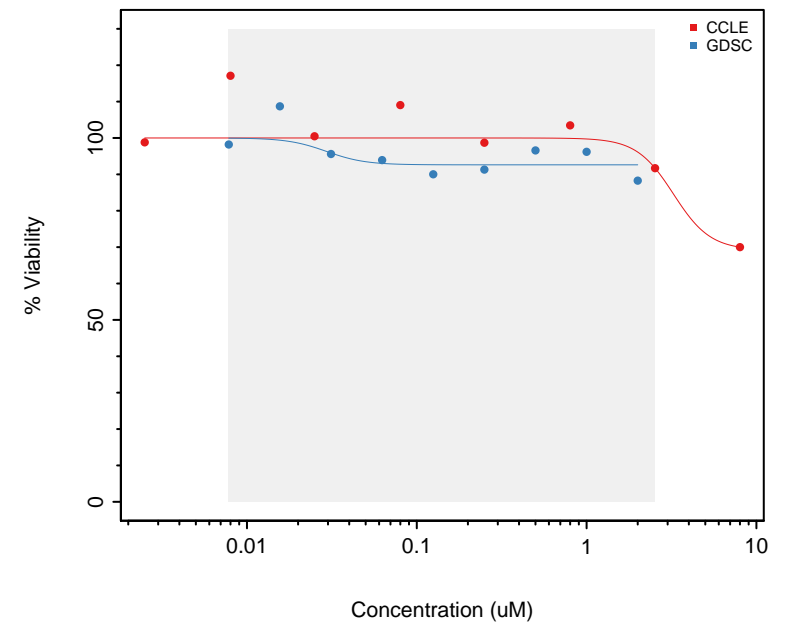

PHA-665752:BT-474

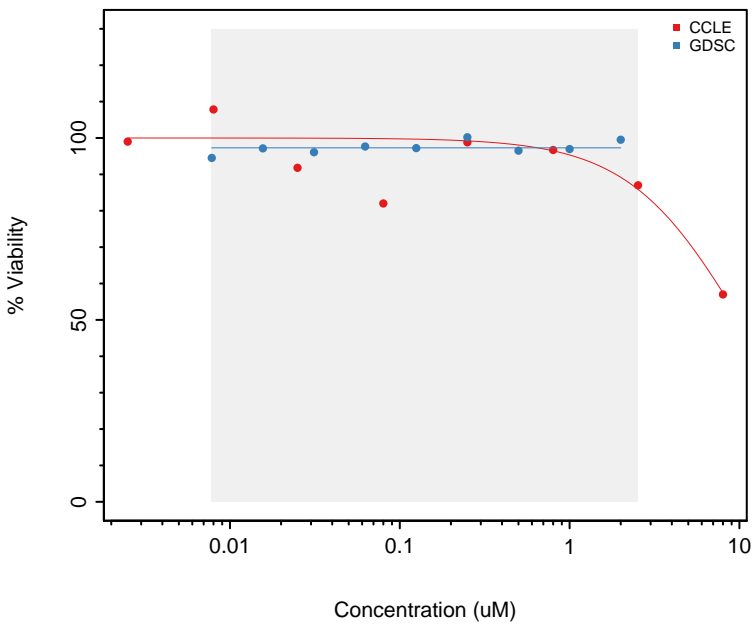

PHA-665752:C2Be1

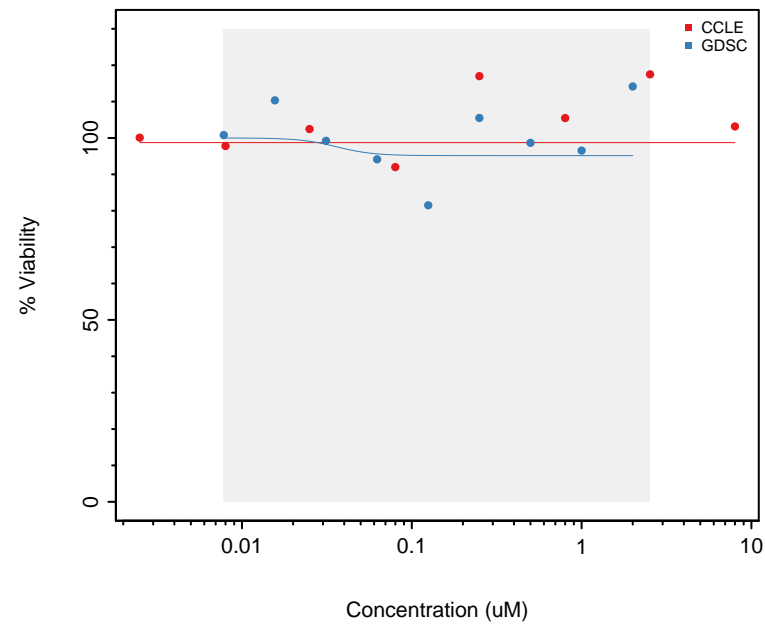

PHA-665752:Calu-6

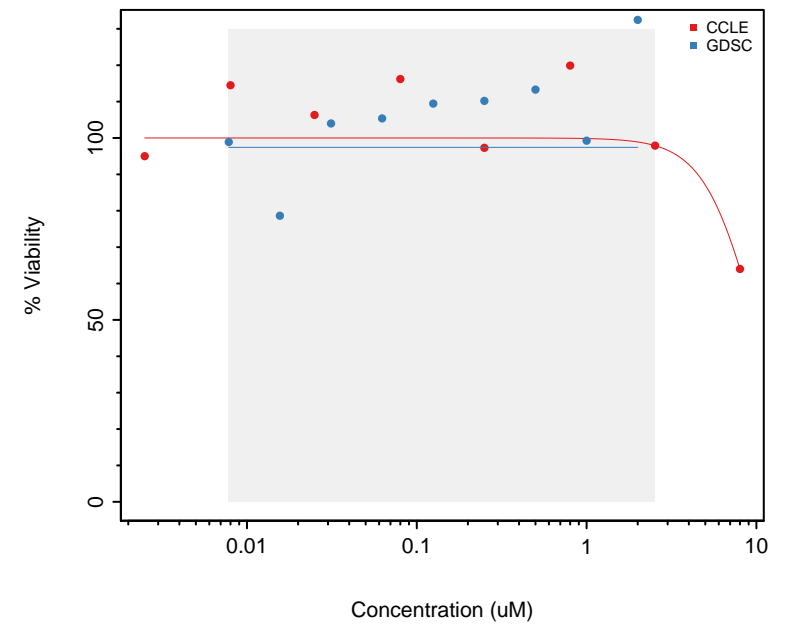

PHA-665752:CAS-1

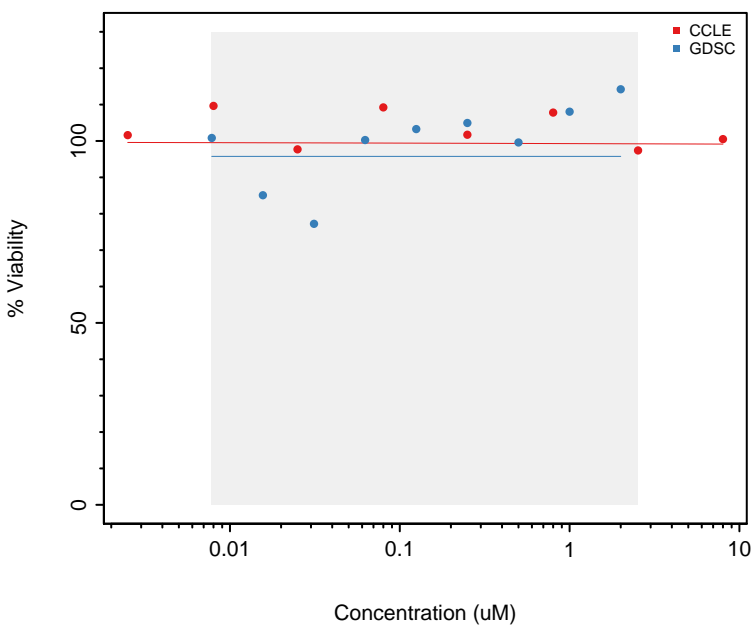

PHA-665752:COLO-320-HSR

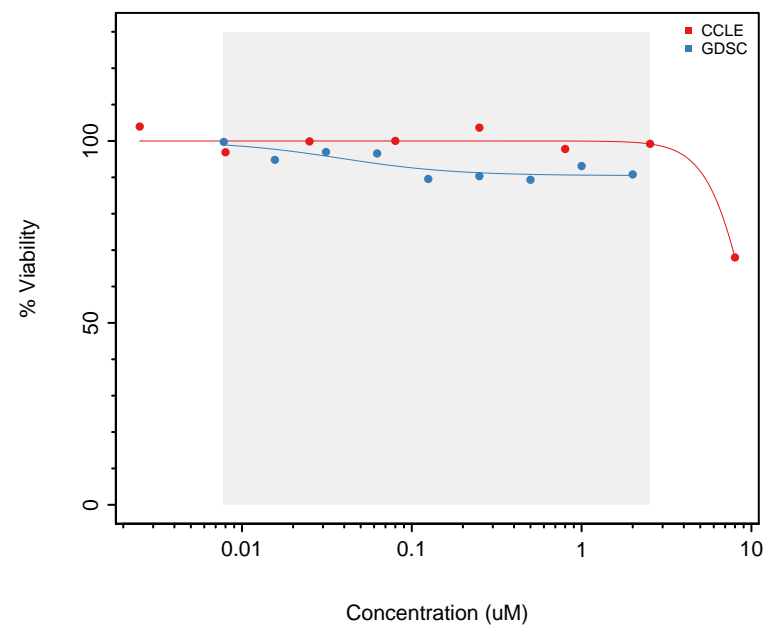

PHA-665752:DEL

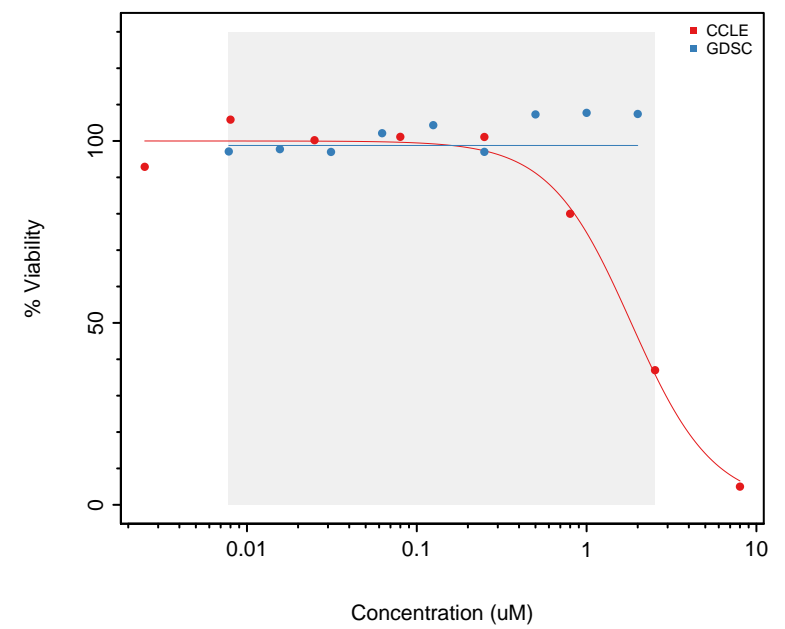

PHA-665752:DMS-114

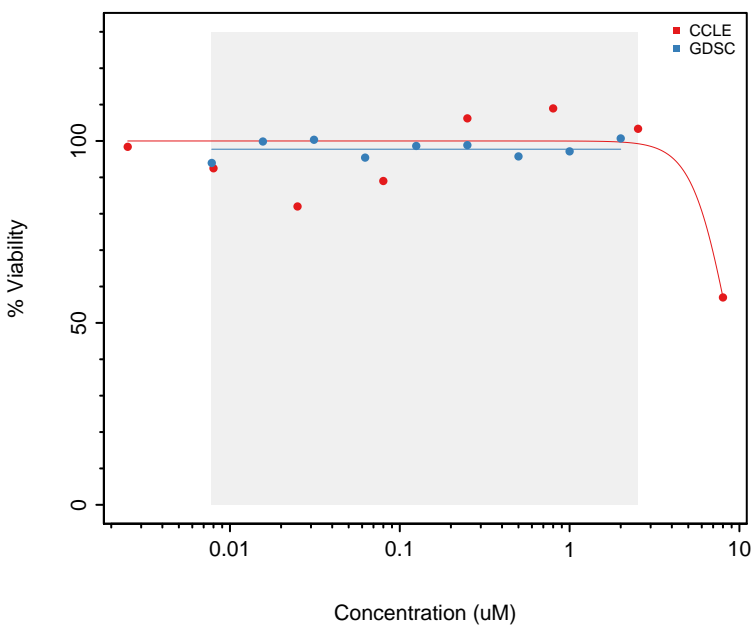

PHA-665752:DOHH-2

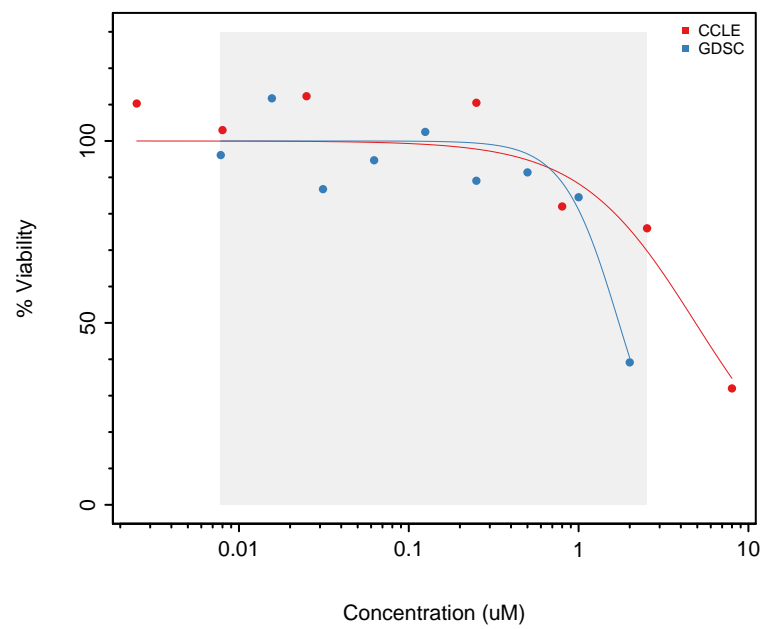

PHA-665752:EB2

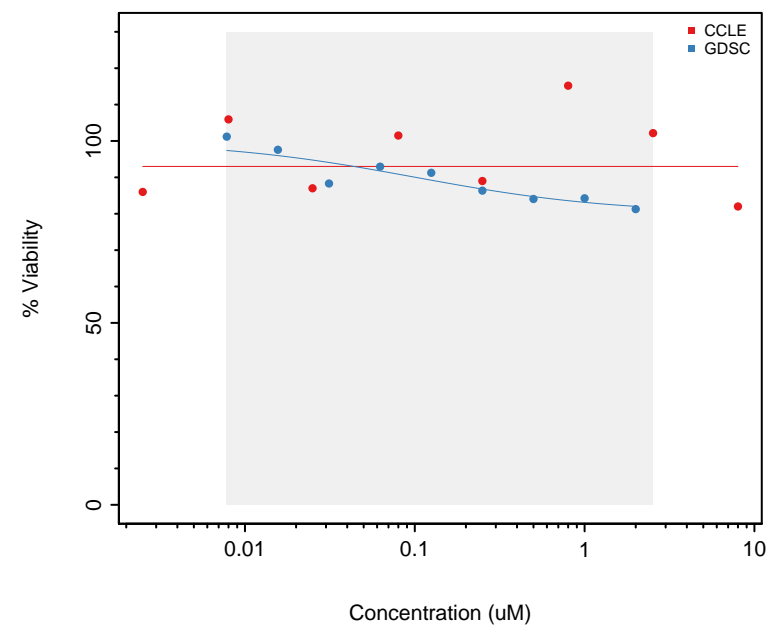

PHA-665752:EM-2

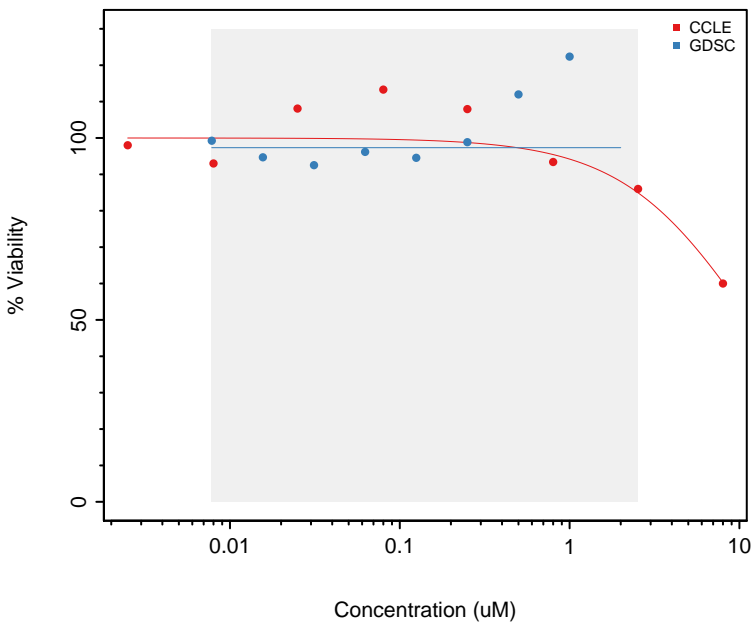

PHA-665752:GB-1

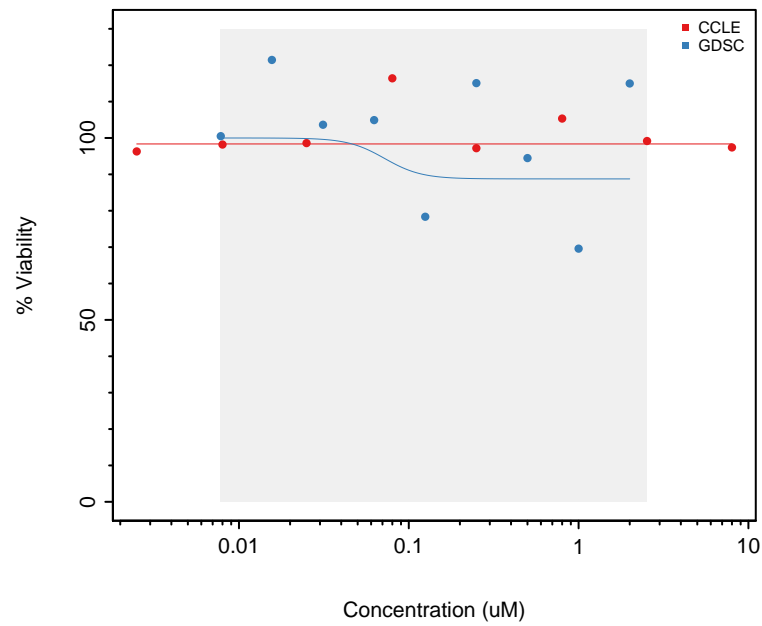

PHA-665752:GCIY

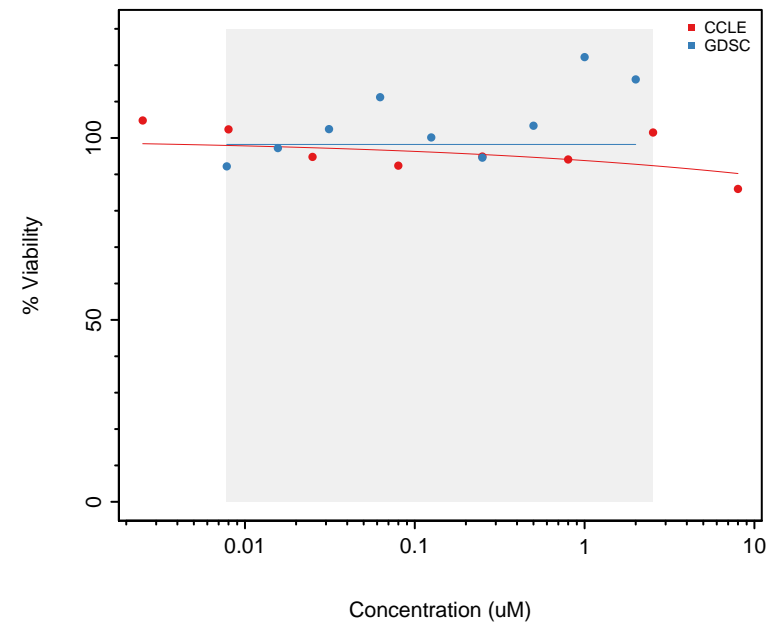

PHA-665752:GI-1

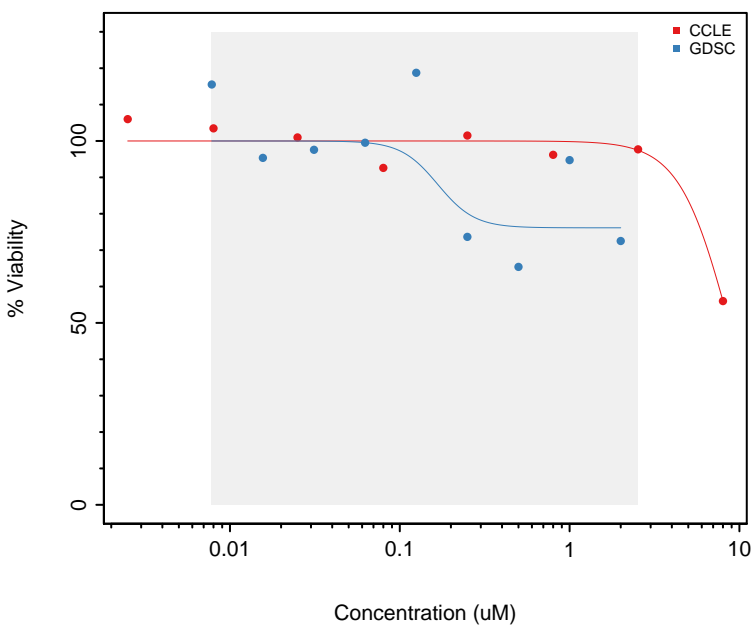

PHA-665752:HCC1187

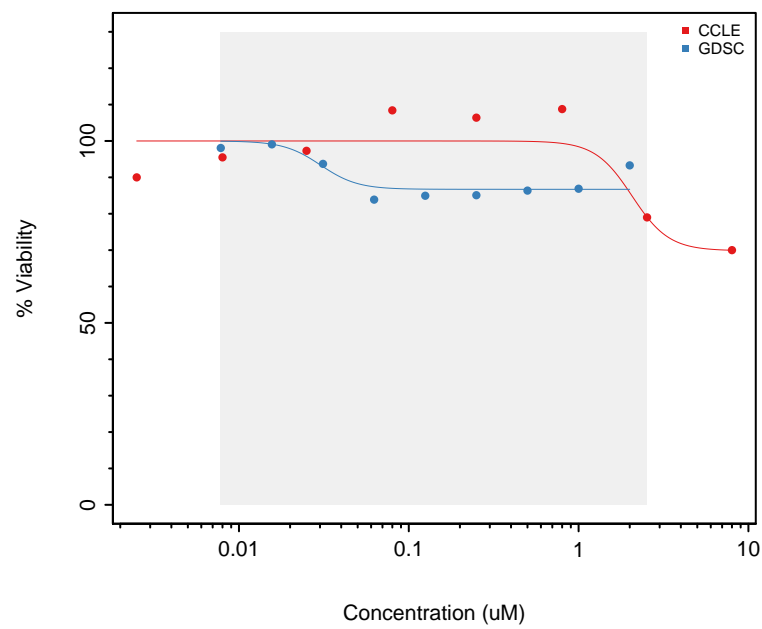

PHA-665752:HD-MY-Z

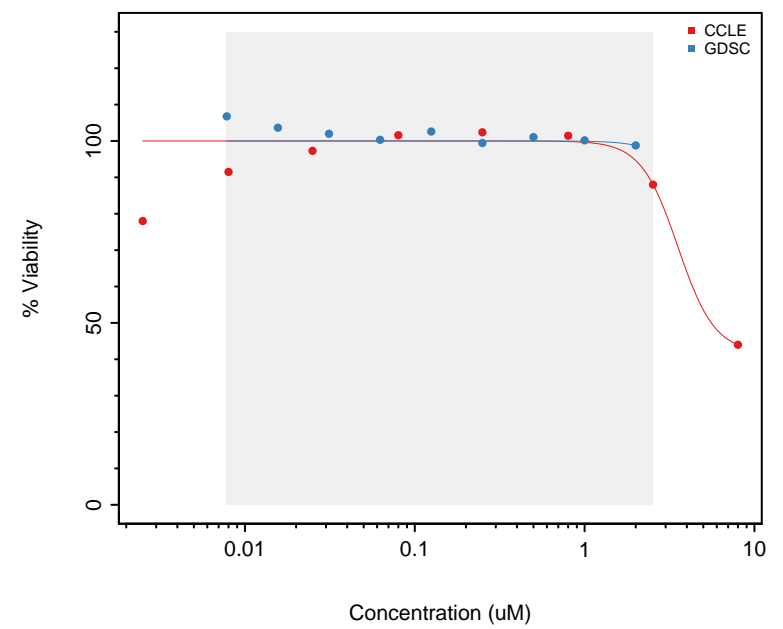

PHA-665752:HH

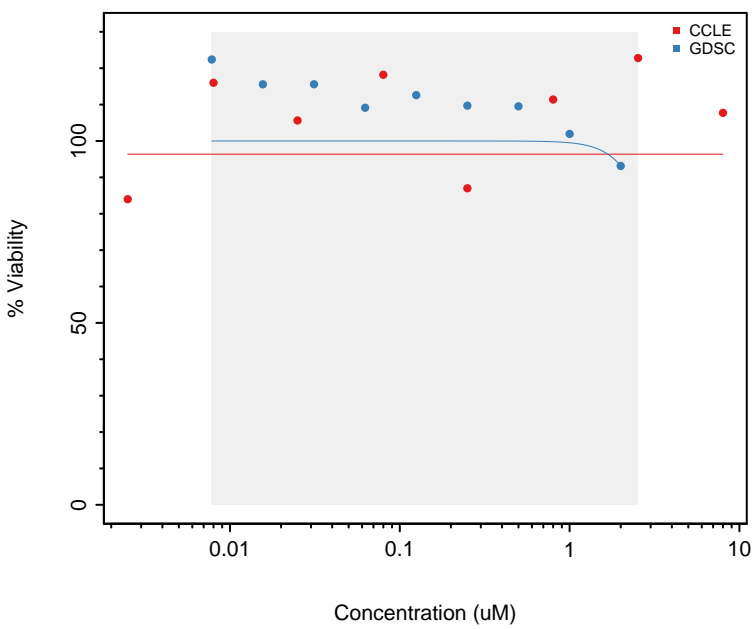

PHA-665752:HT

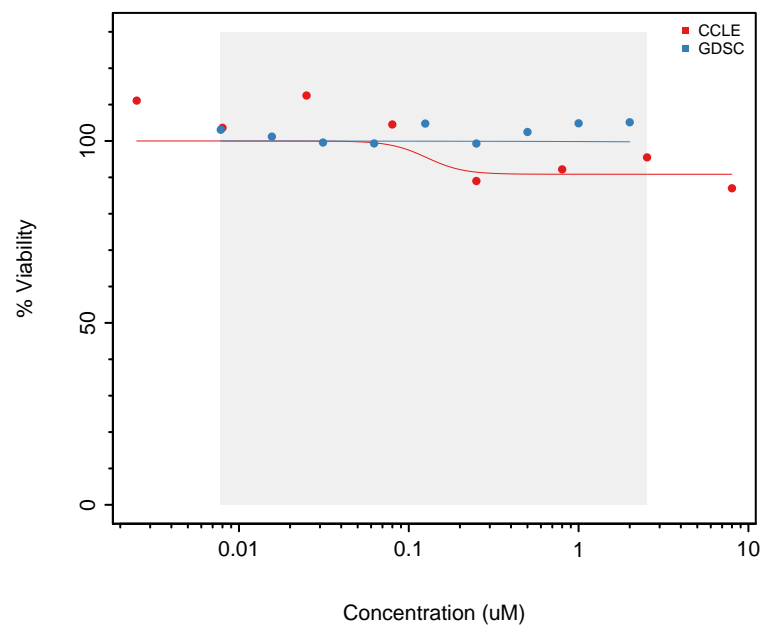

PHA-665752:HT-144

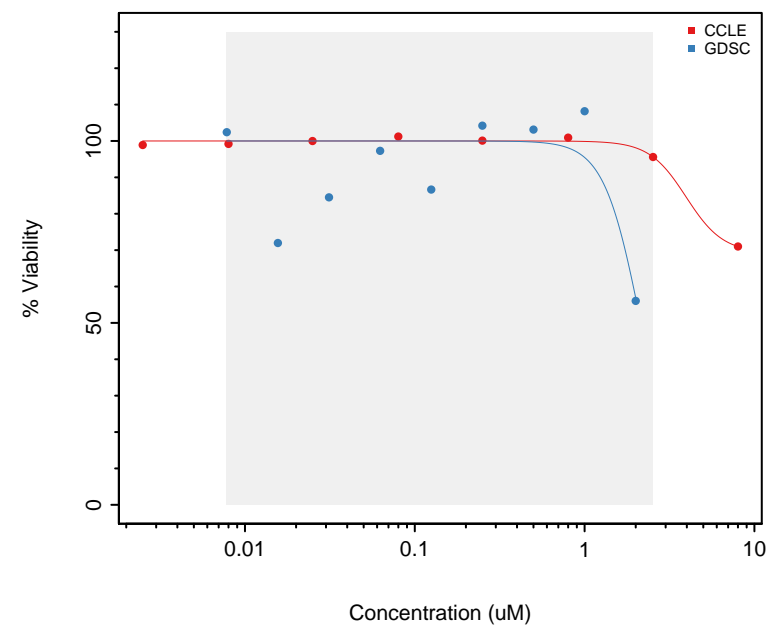



PHA-665752:KURAMOCHI

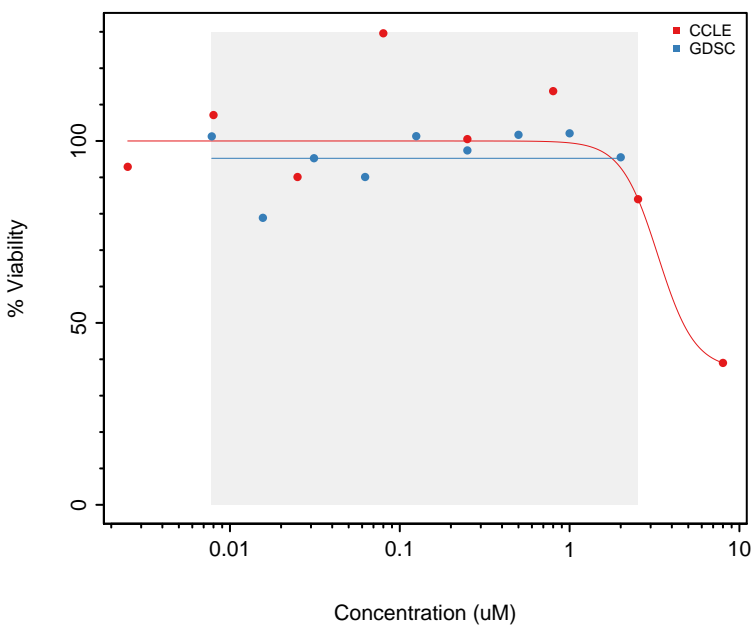

PHA-665752:L-363

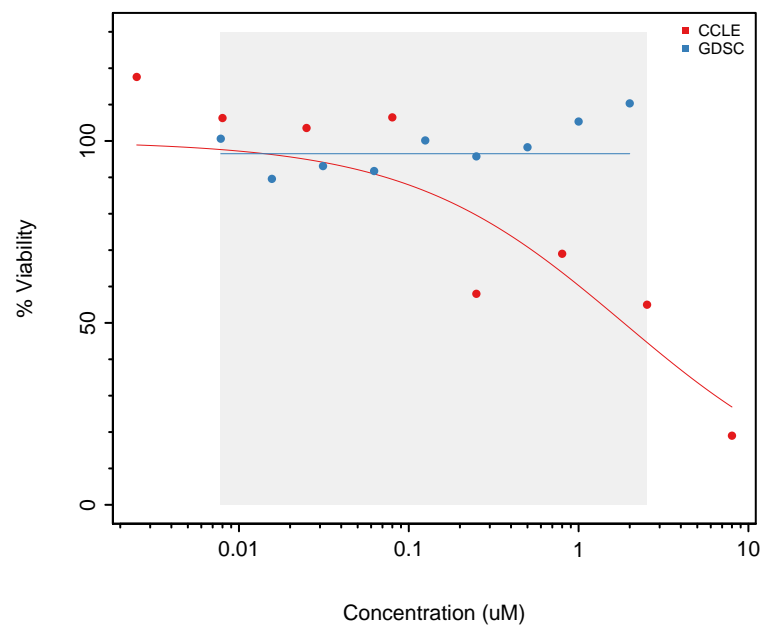

PHA-665752:L-428

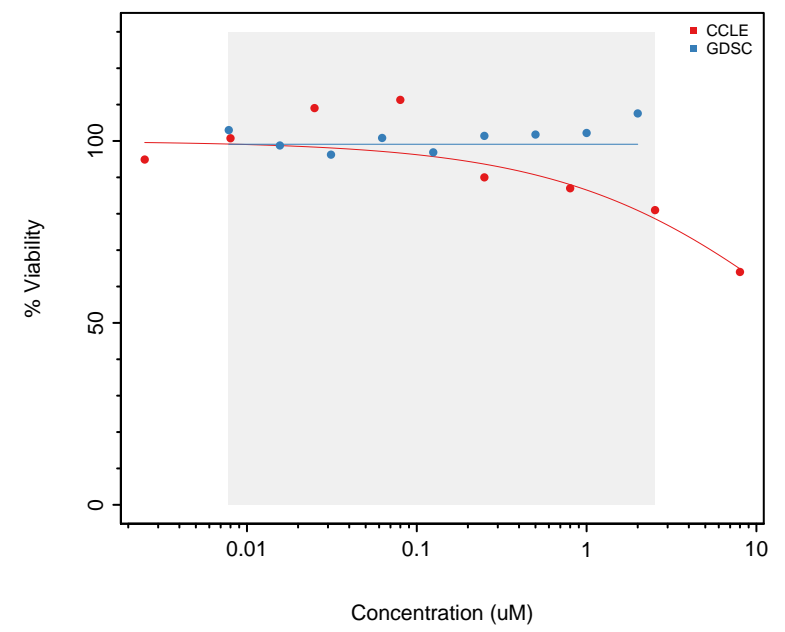

PHA-665752:LOXIMVI

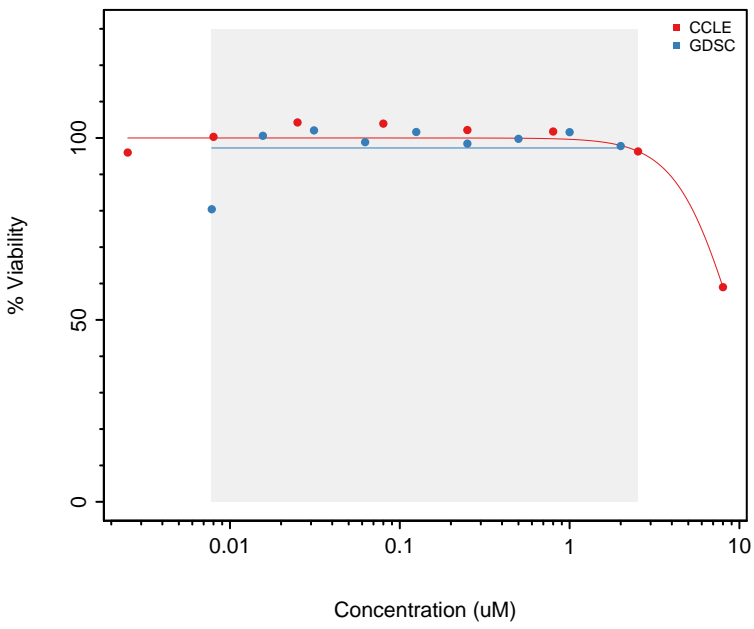

PHA-665752:LP-1

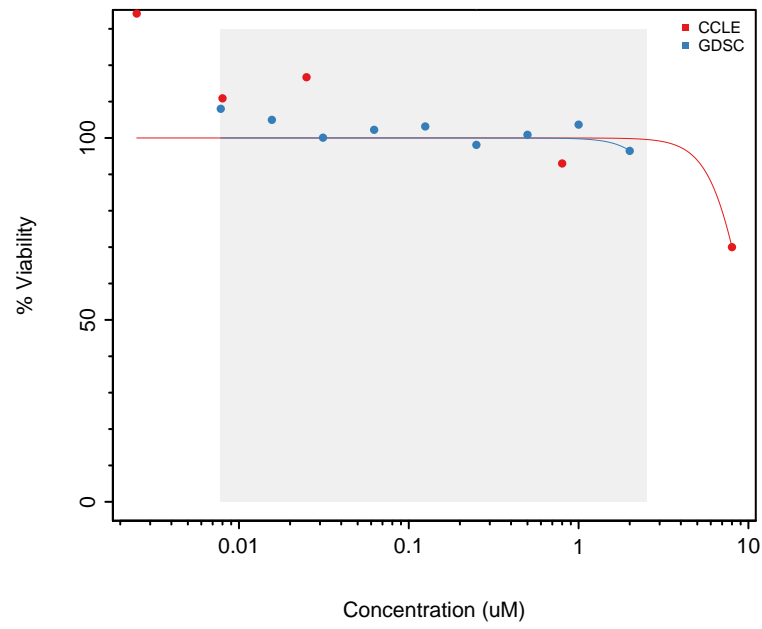

PHA-665752:LS-123

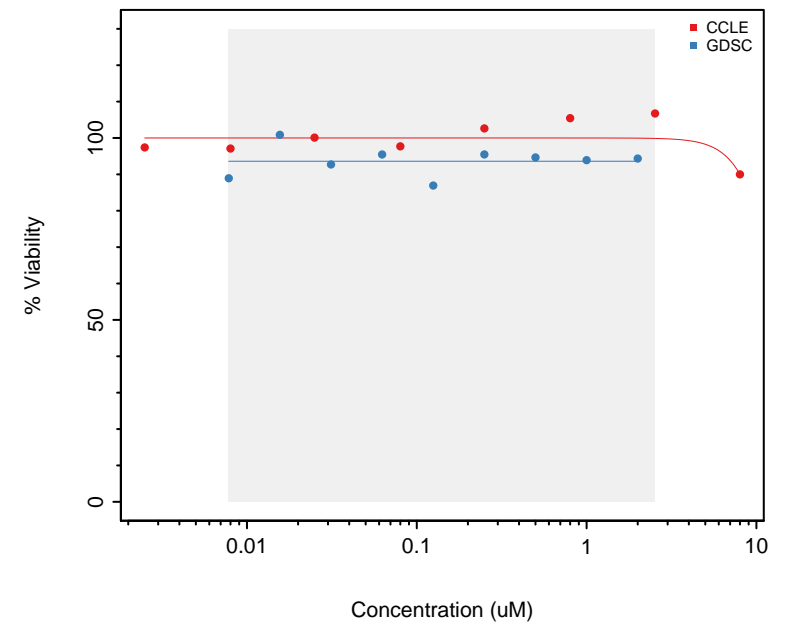

PHA-665752:LS-513

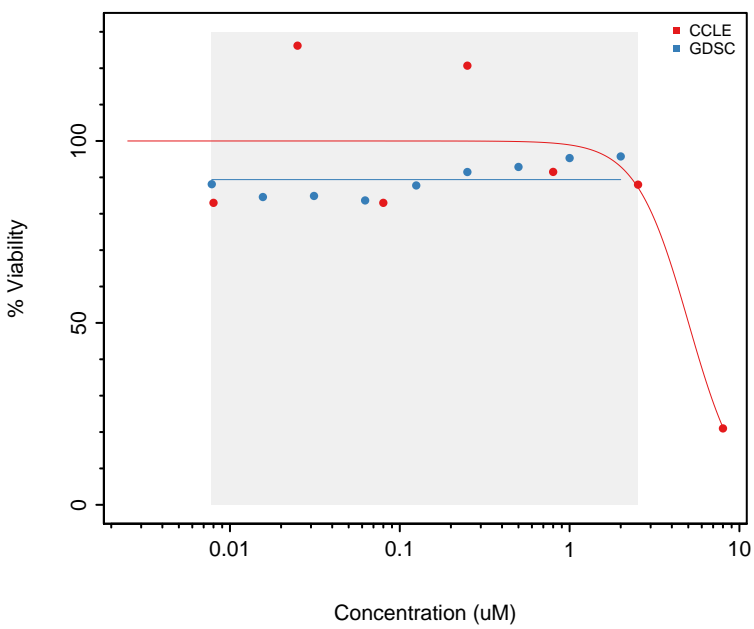

PHA-665752:MC116

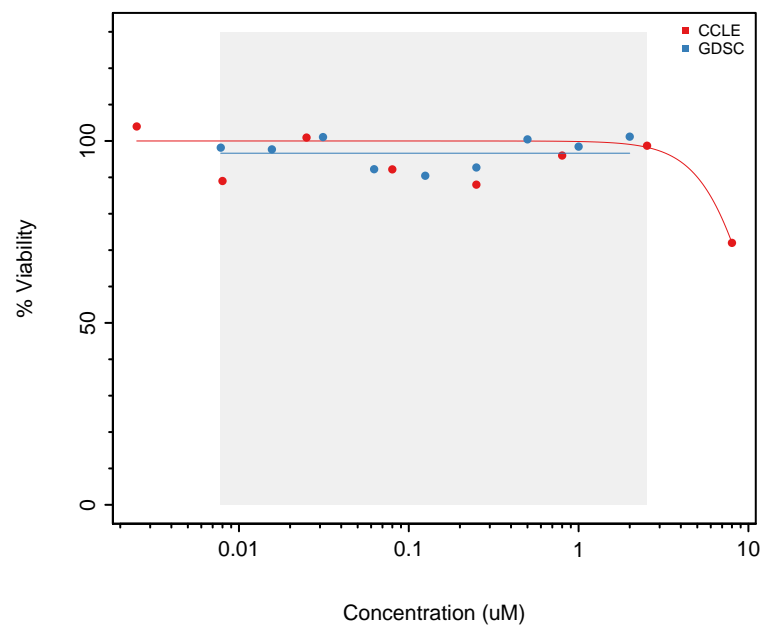

PHA-665752:MEG-01

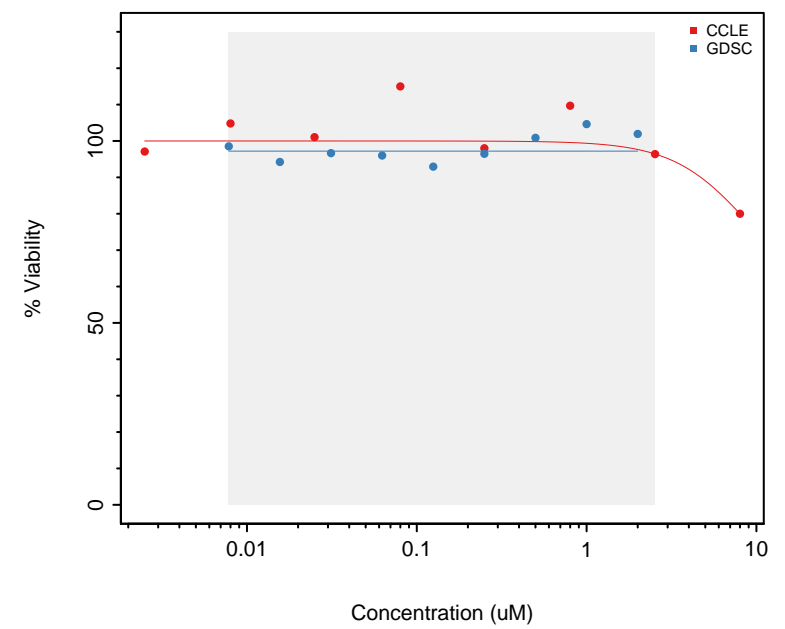

PHA-665752:MPP-89

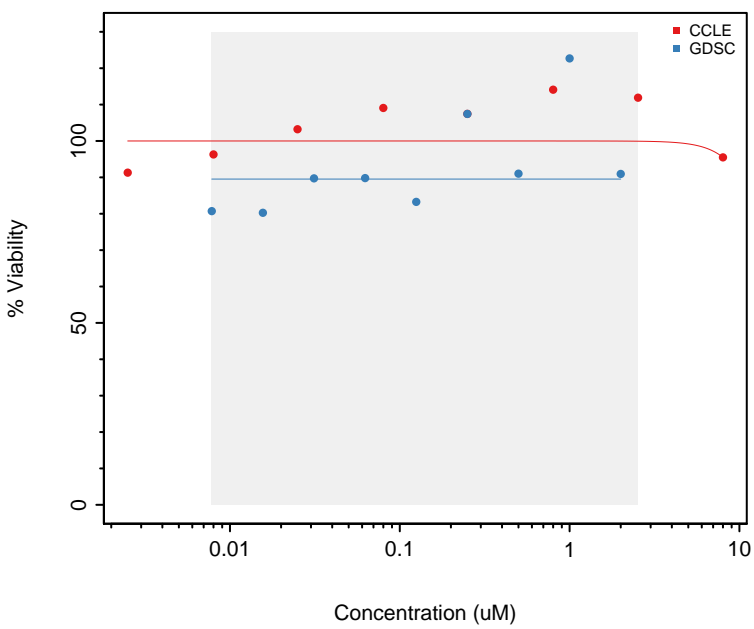

PHA-665752:MSTO-211H

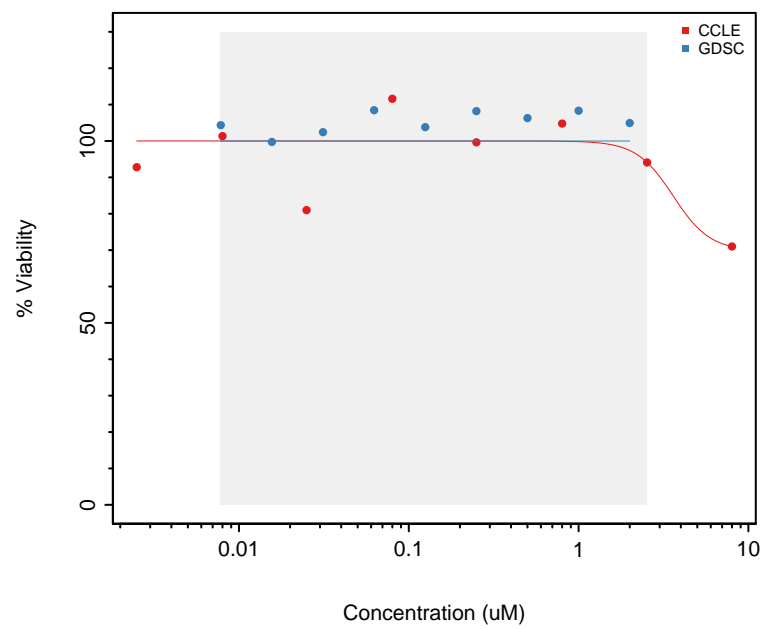

PHA-665752:NCI-H1092

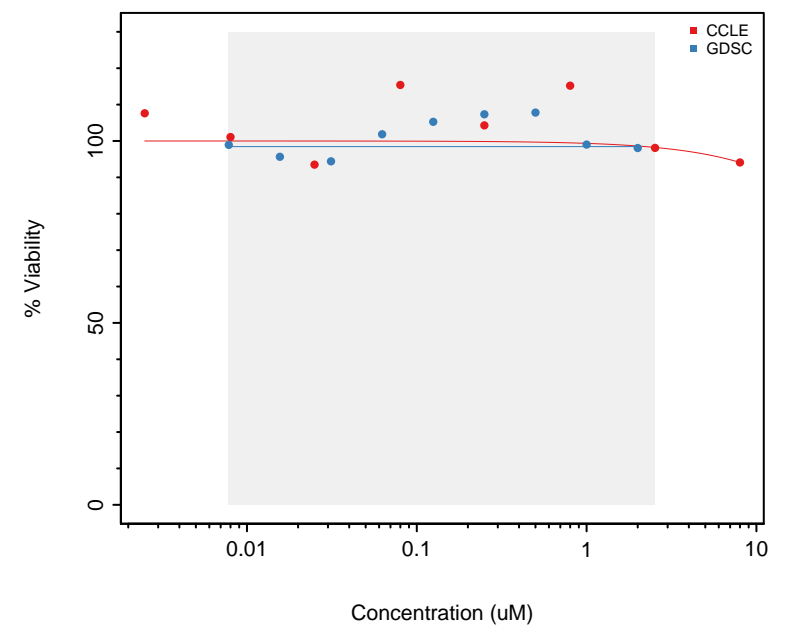



PHA-665752:ONS-76

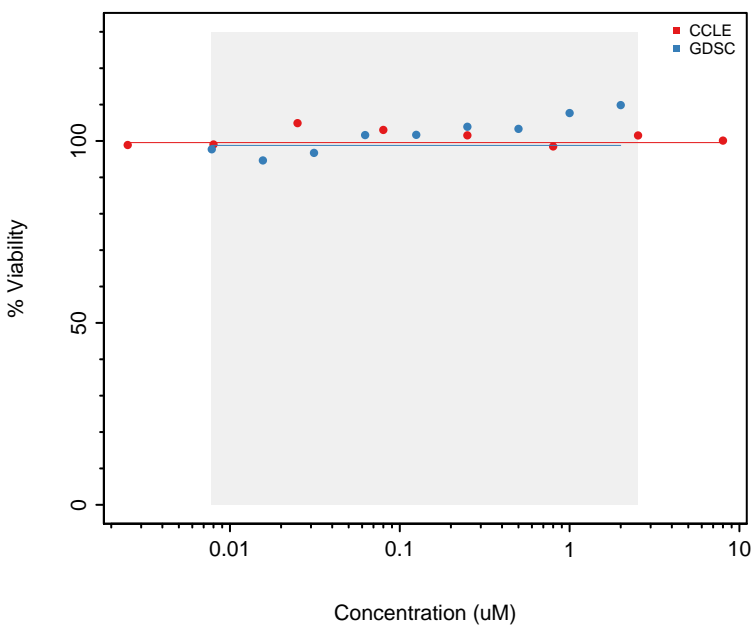

PHA-665752:OPM-2

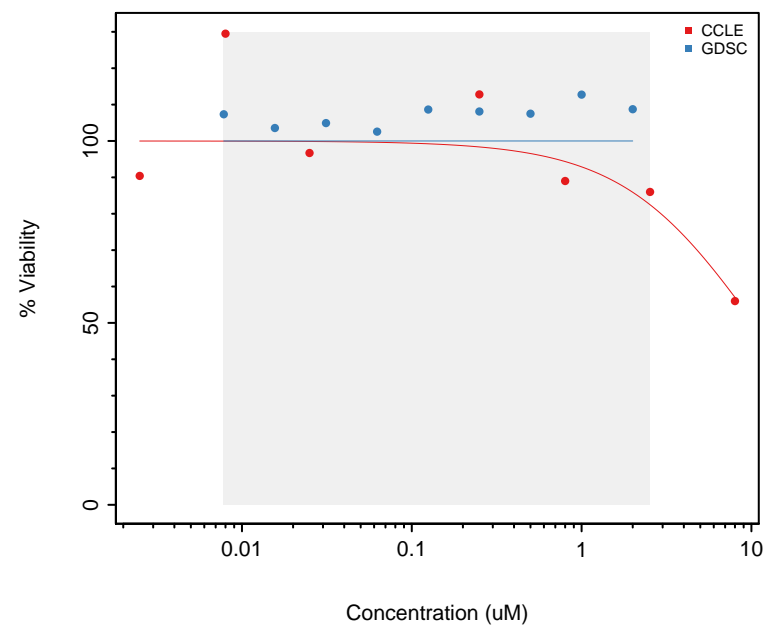

PHA-665752:OVCAR-4

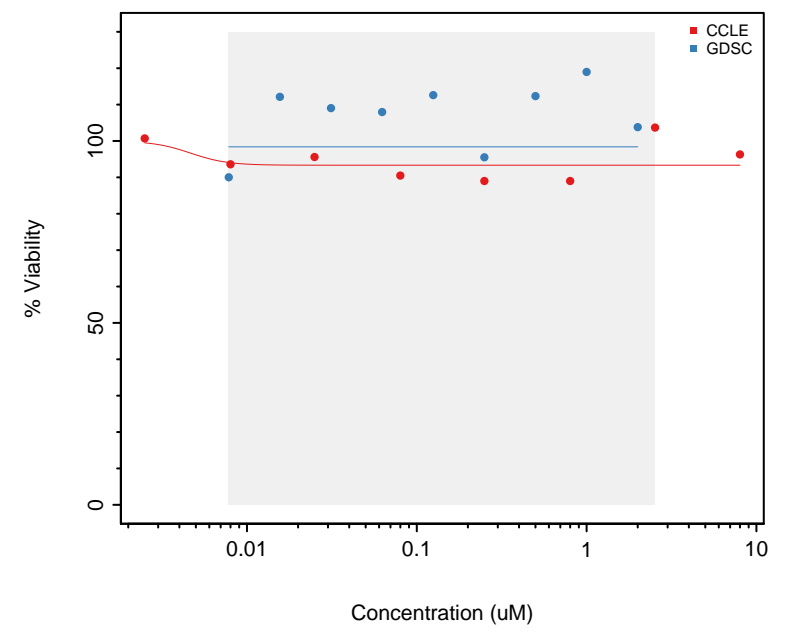

PHA-665752:P31-FUJ

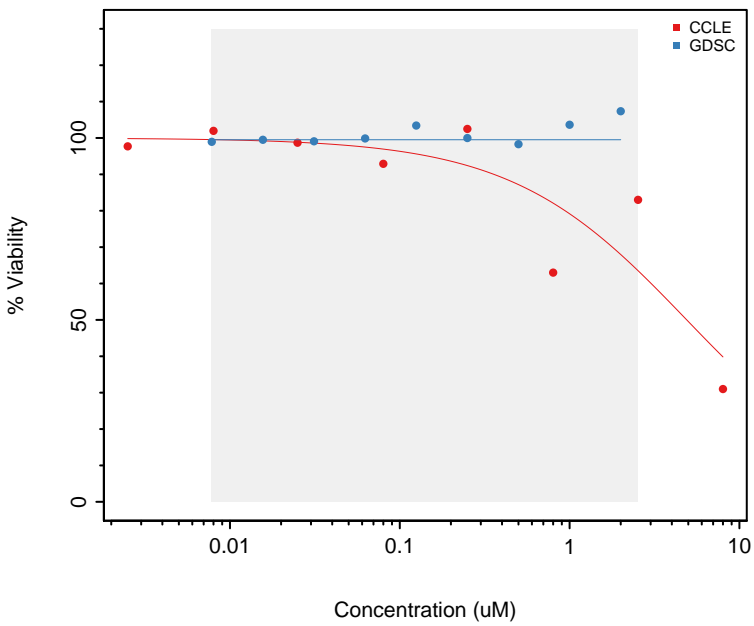

PHA-665752:PSN1

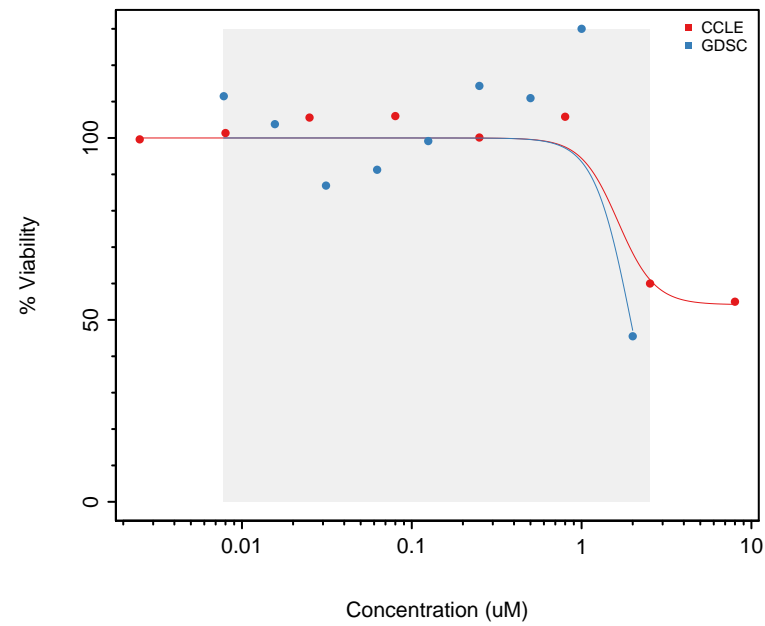

PHA-665752:Raji

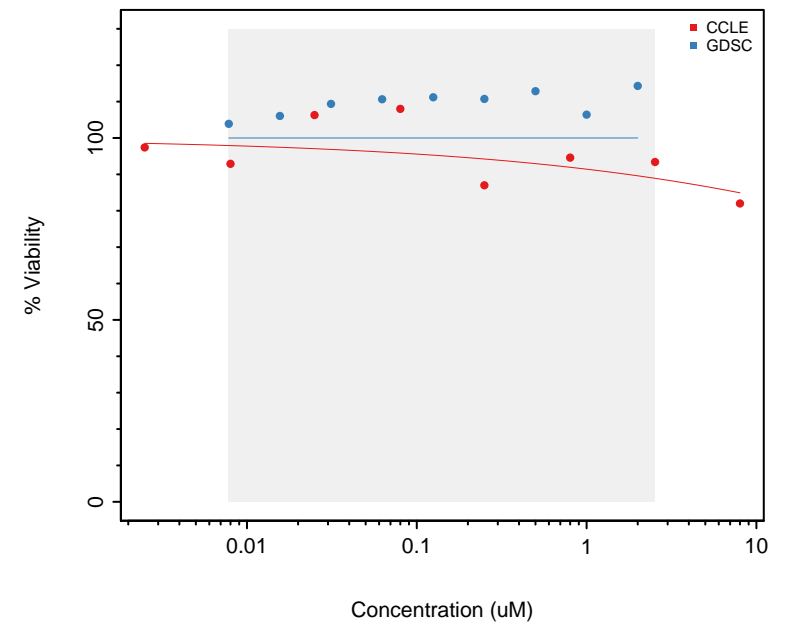

PHA-665752:REH

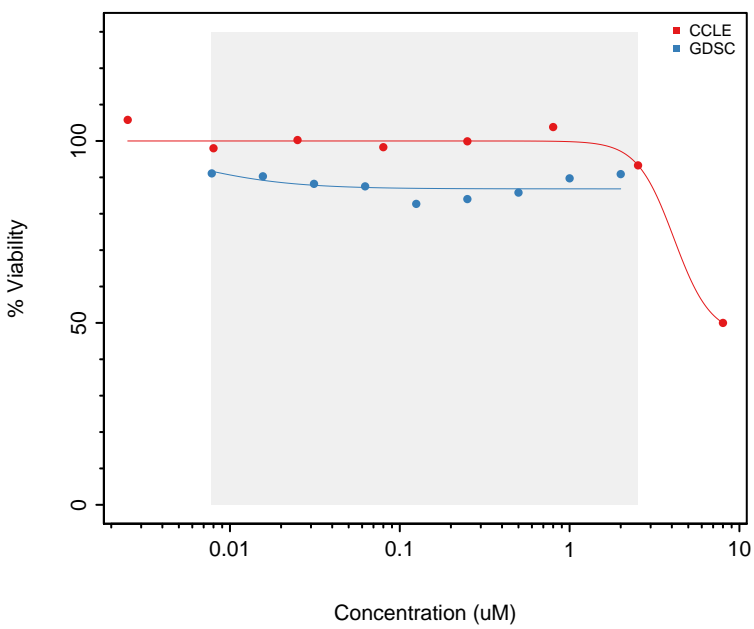

PHA-665752:RKO

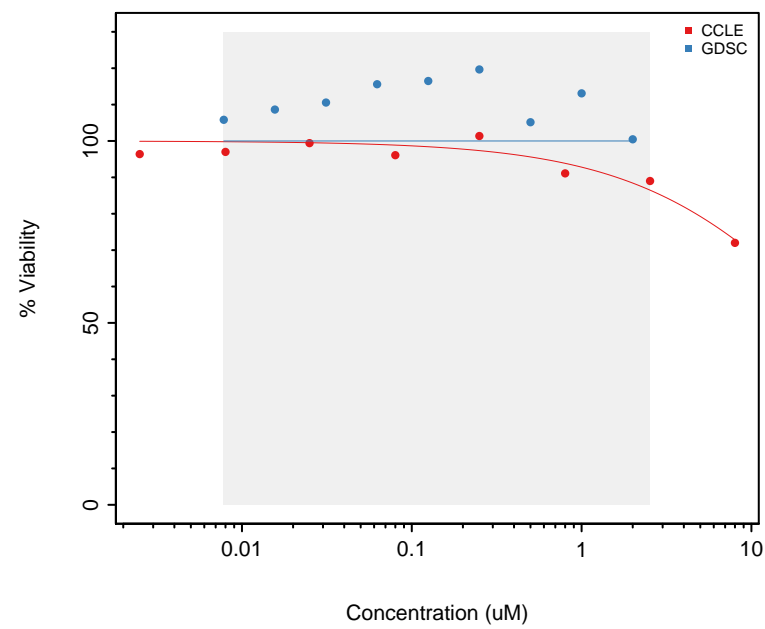

PHA-665752:RL95-2

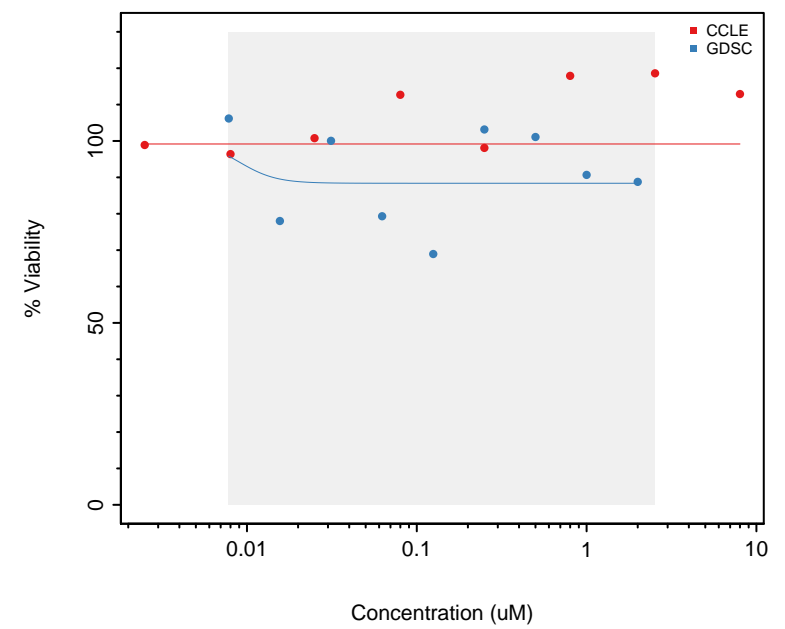

PHA-665752:RPMI-8402

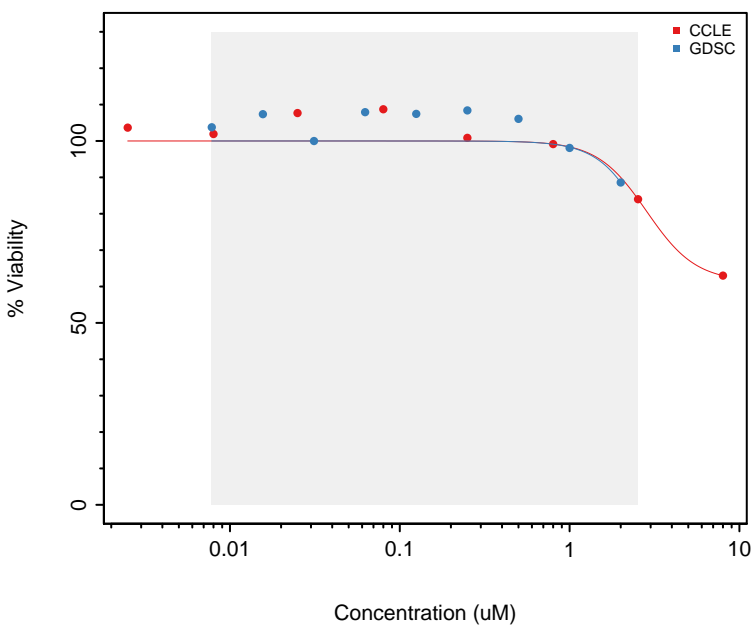

PHA-665752:SF126

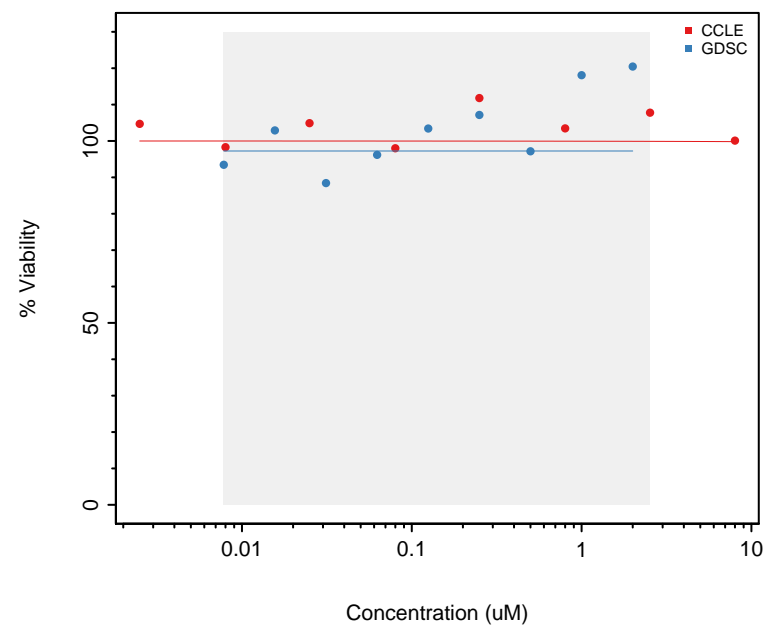

PHA-665752:SHP-77

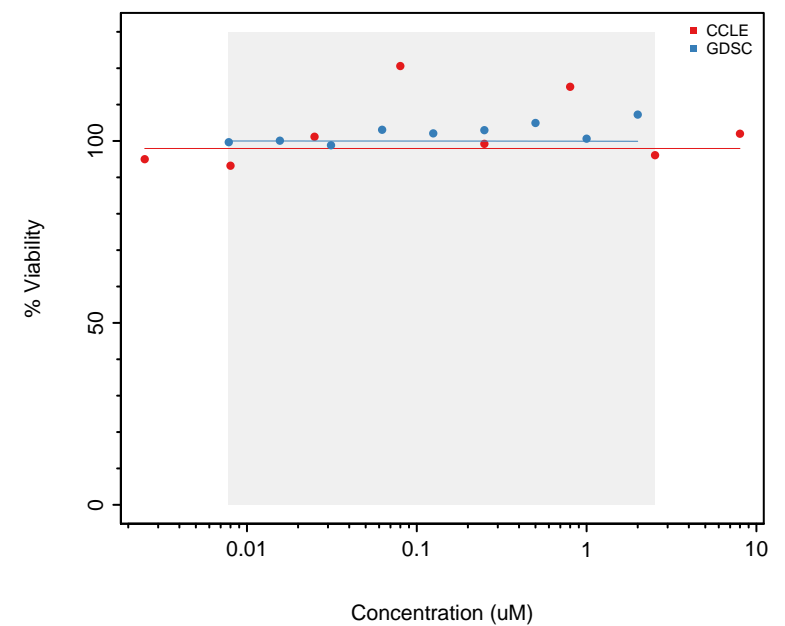

PHA-665752:SIG-M5

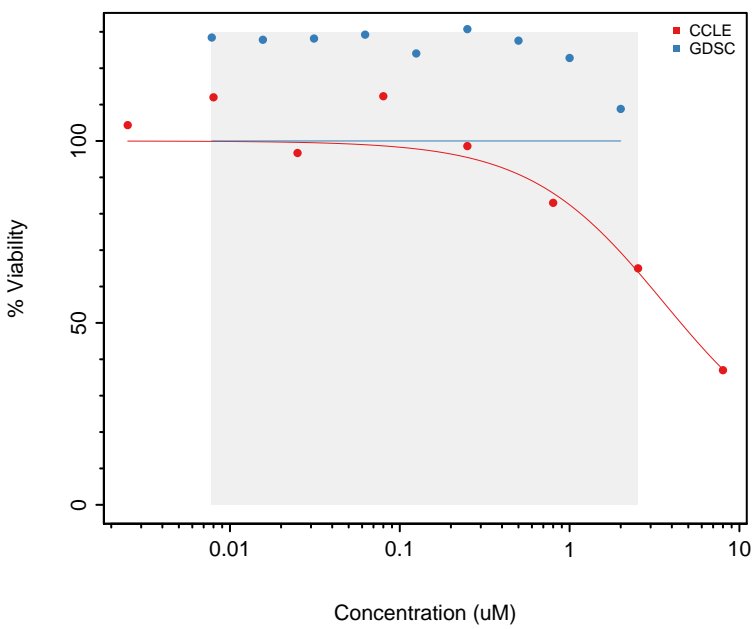

PHA-665752:SIMA

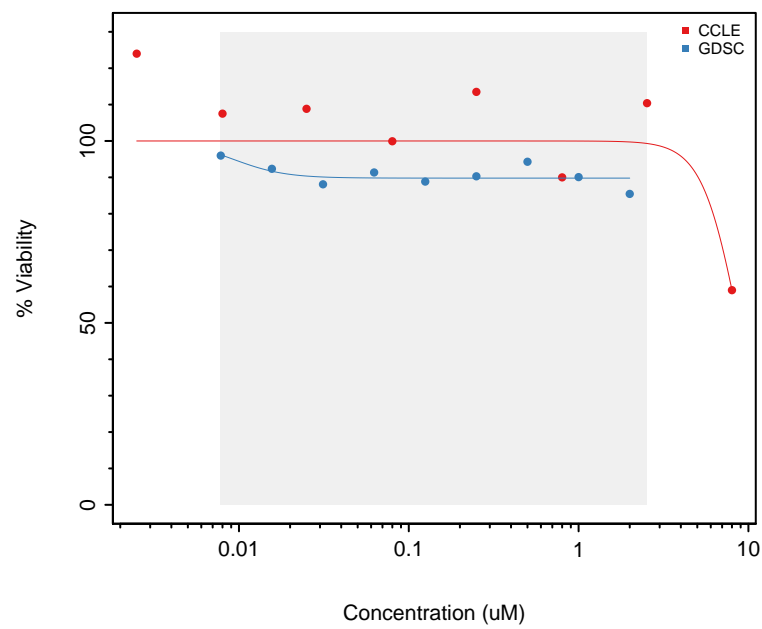

PHA-665752:SJSA-1

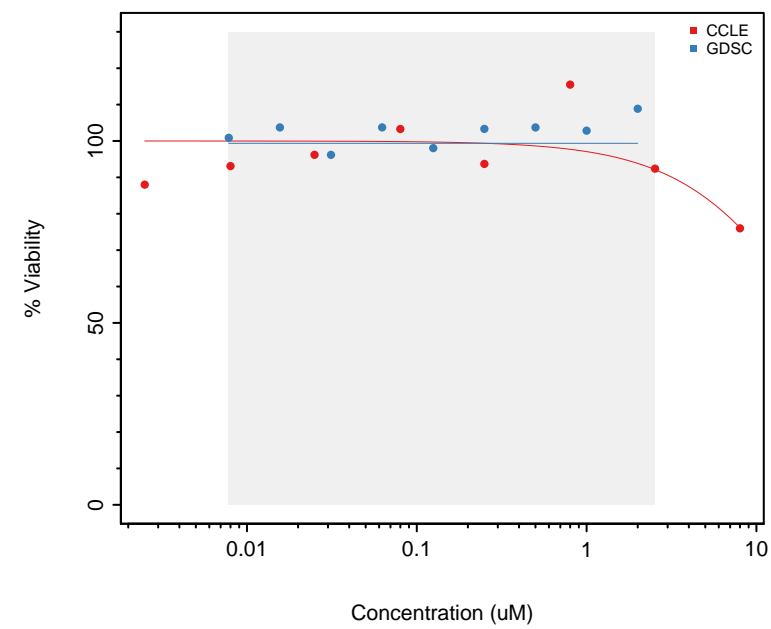

PHA-665752:SK-LMS-1

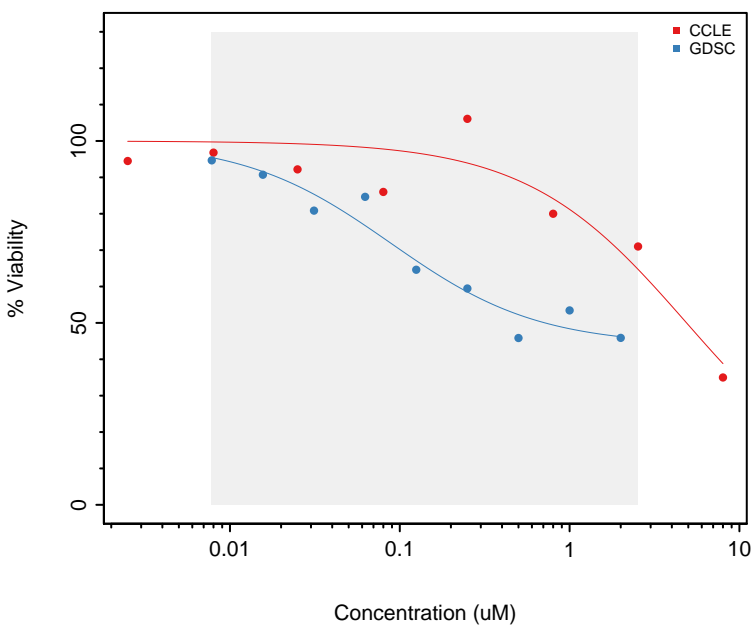

PHA-665752:SK-MEL-2

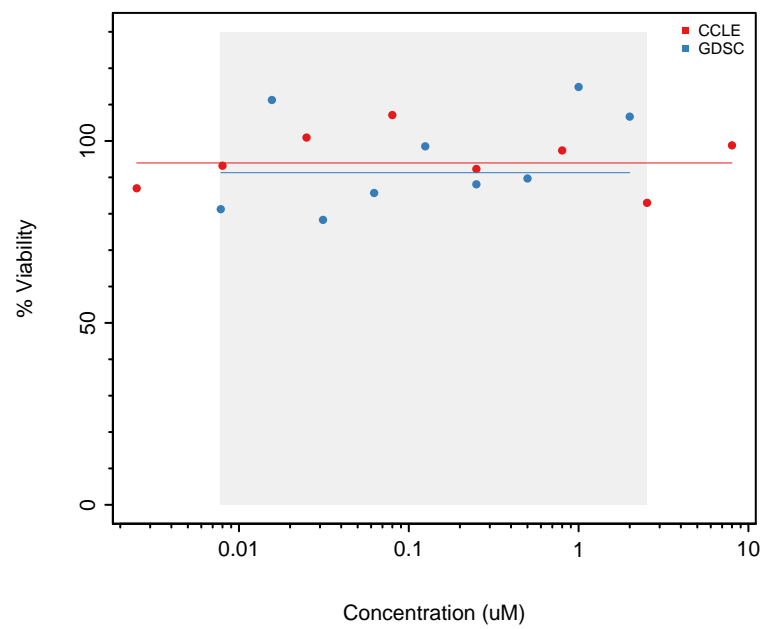

PHA-665752:SK-MM-2

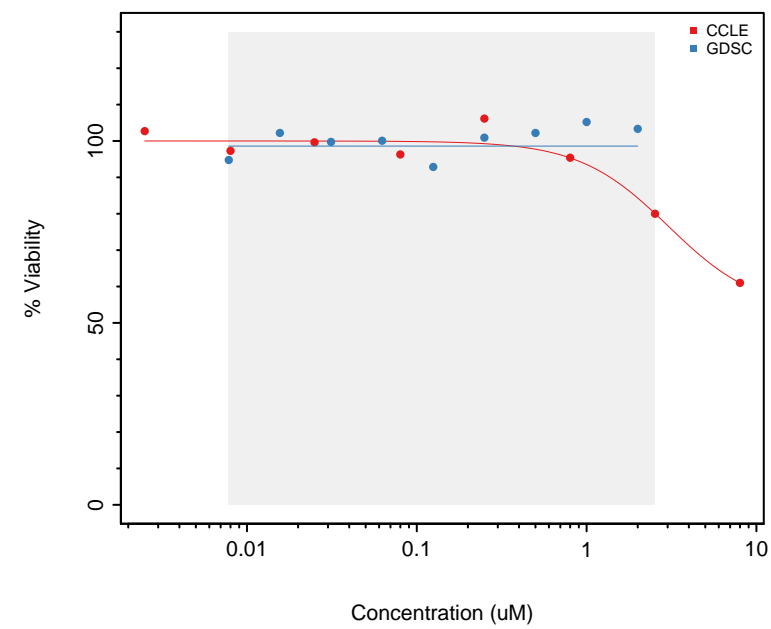

PHA-665752:SK-N-DZ

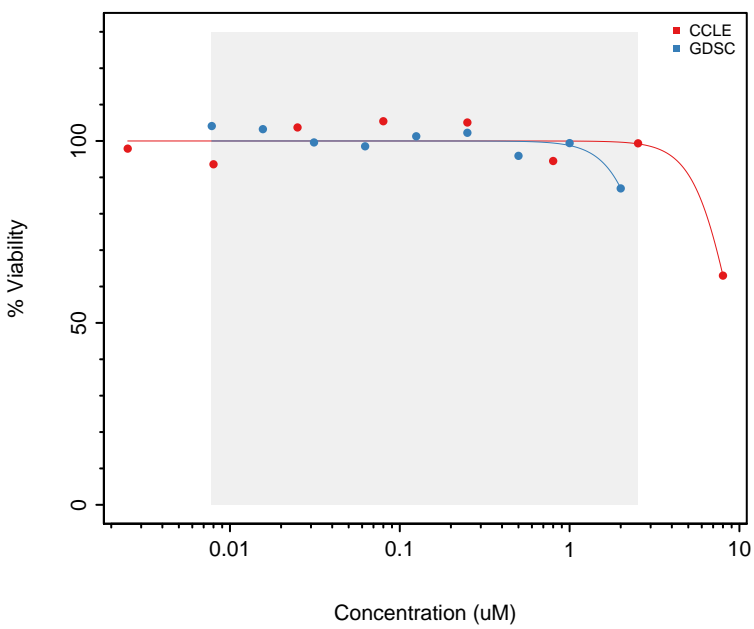

PHA-665752:SK-N-FI

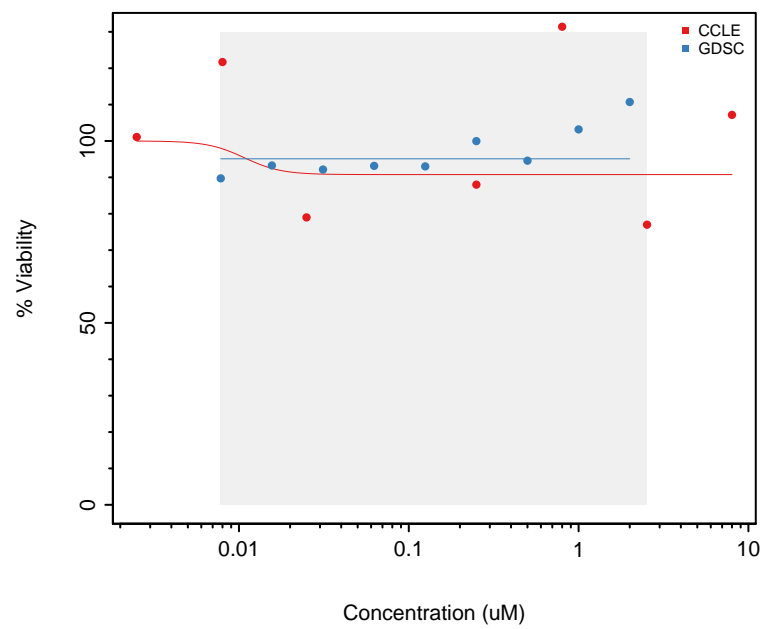

PHA-665752:NCI-SNU-1

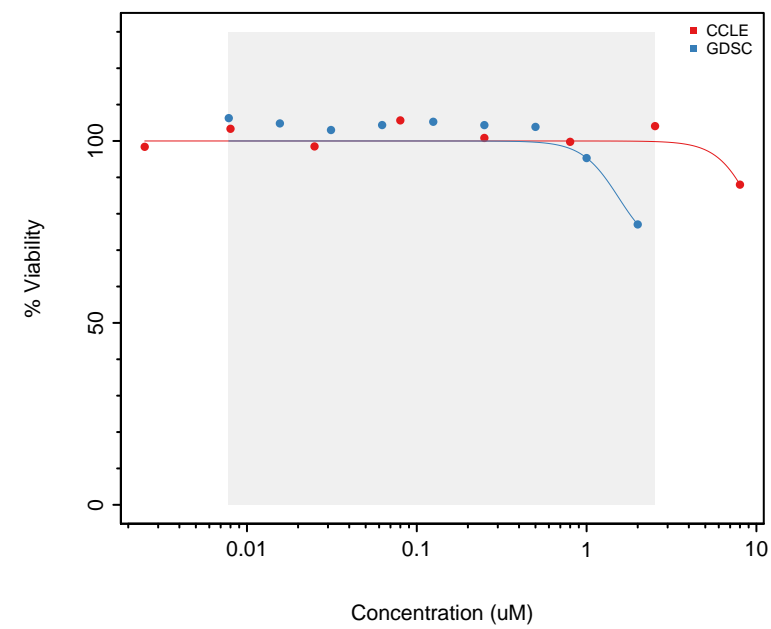

PHA-665752:NCI-SNU-16

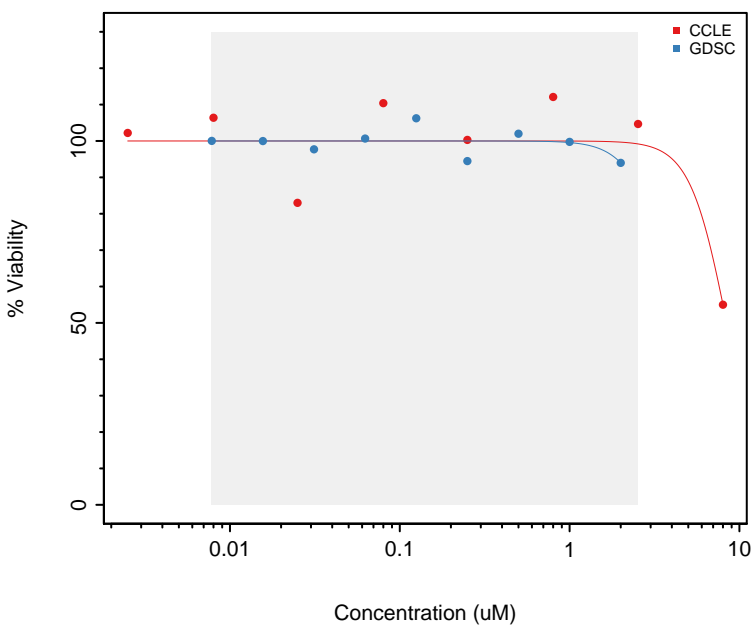

PHA-665752:SNU-C2B

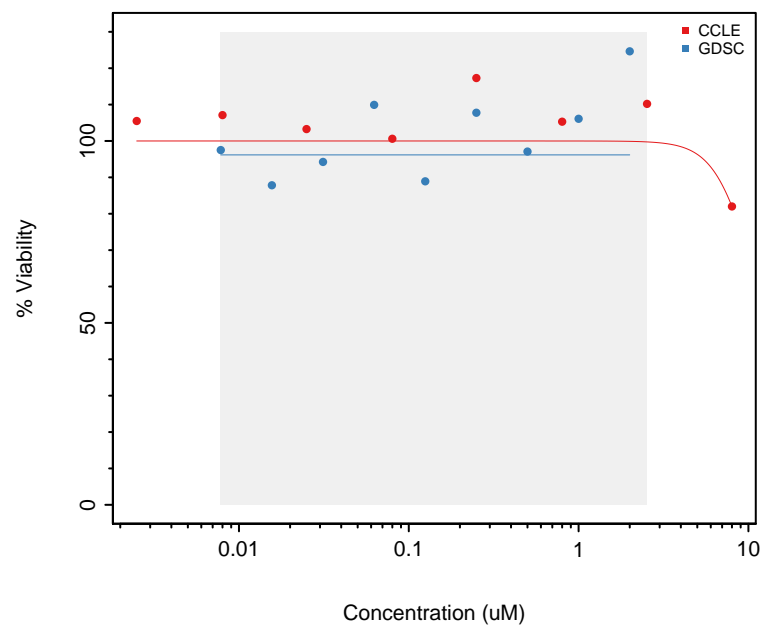

PHA-665752:SUP-T1

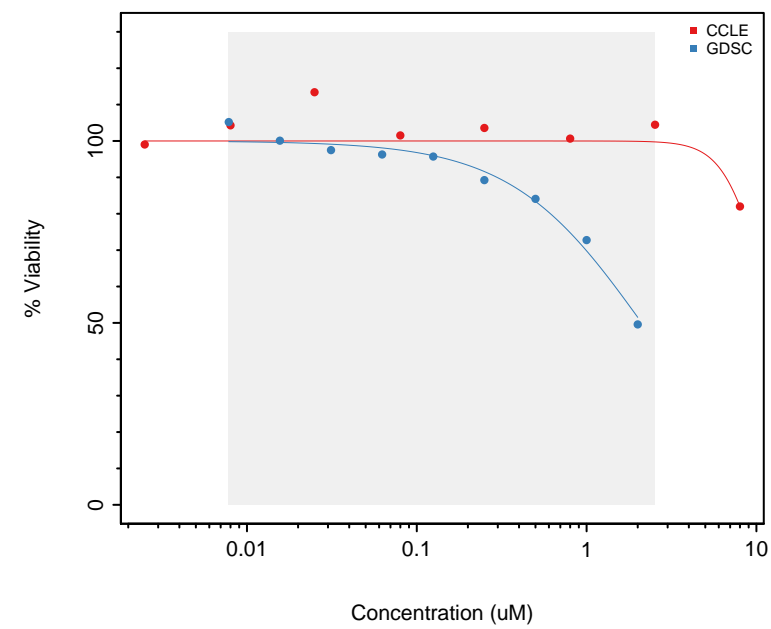

PHA-665752:TE-1

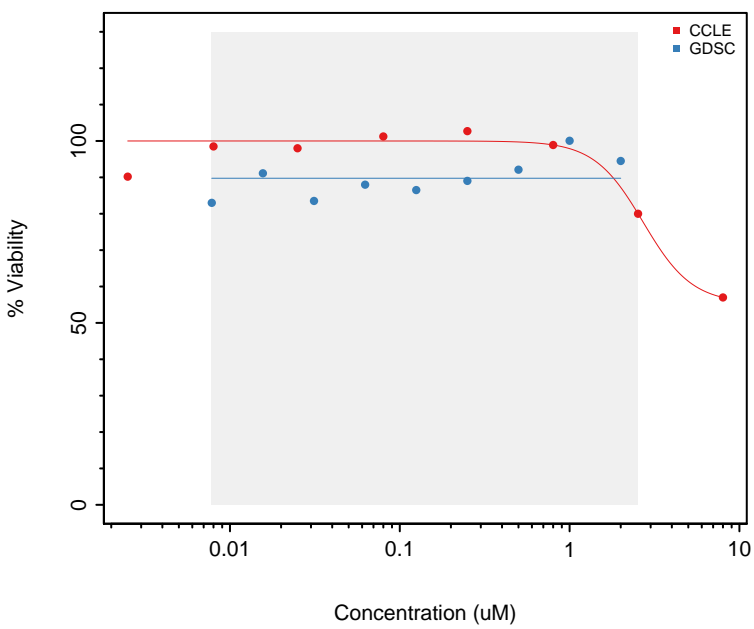

PHA-665752:TE-15

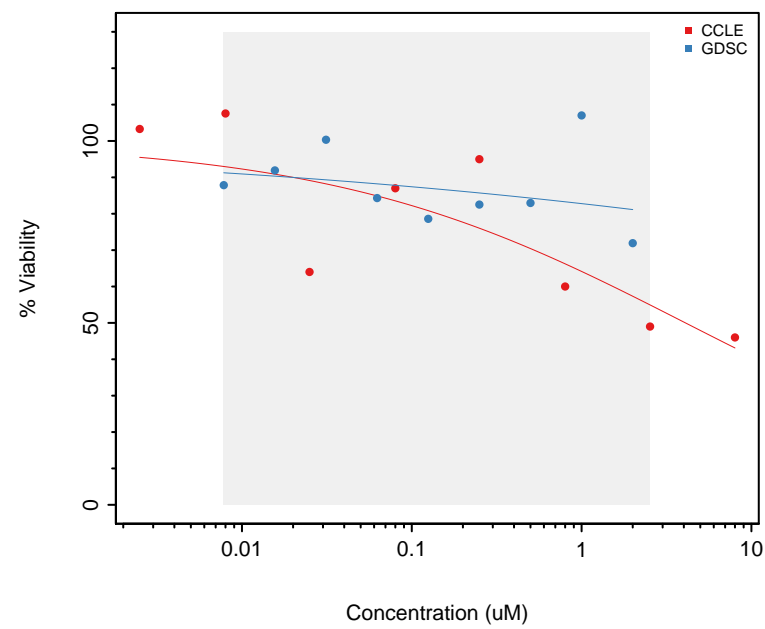

PHA-665752:TE-5

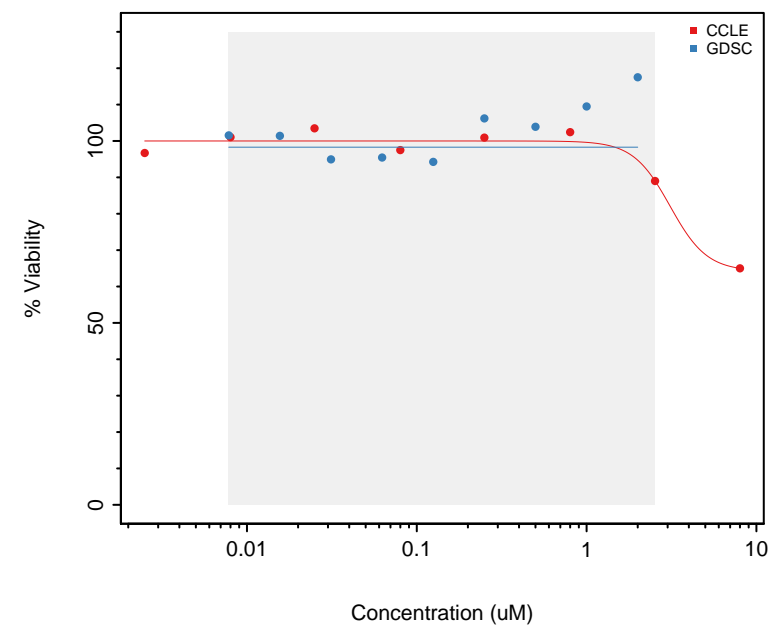

PHA-665752:TE-9

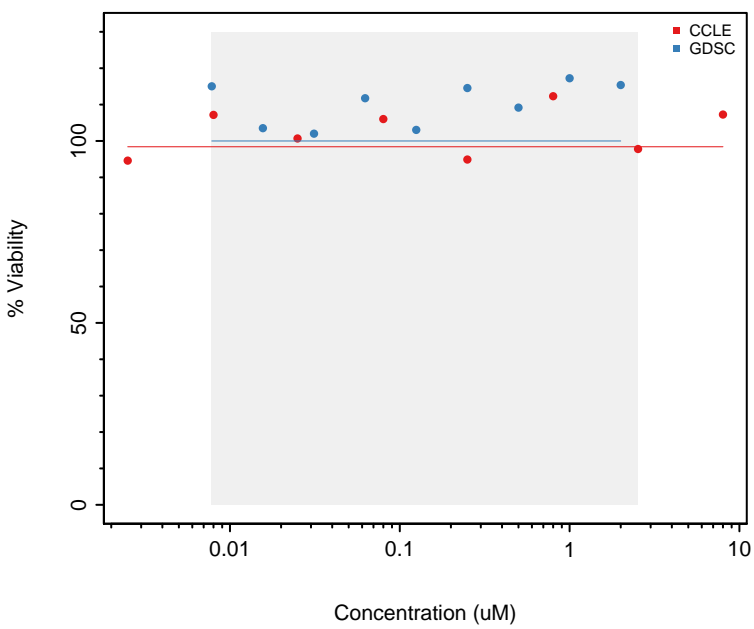

PHA-665752:U-87-MG

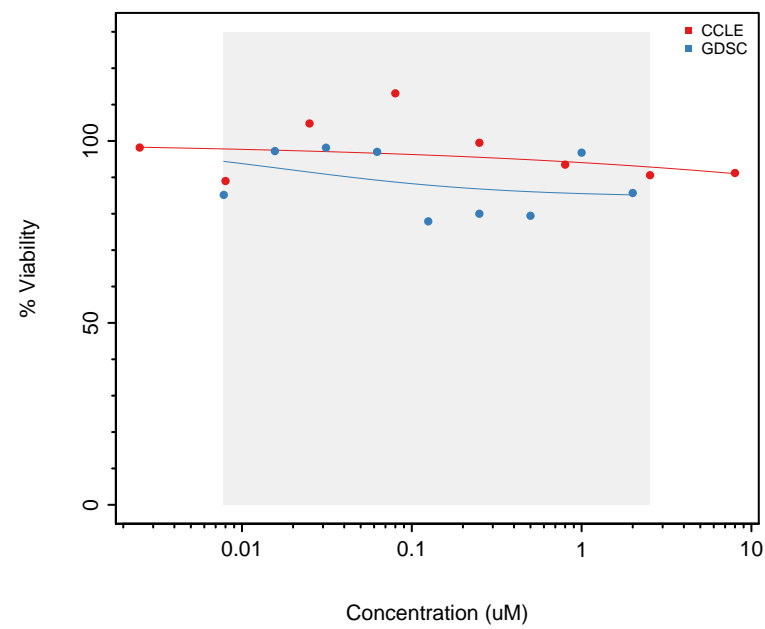

PHA-665752:UACC-257

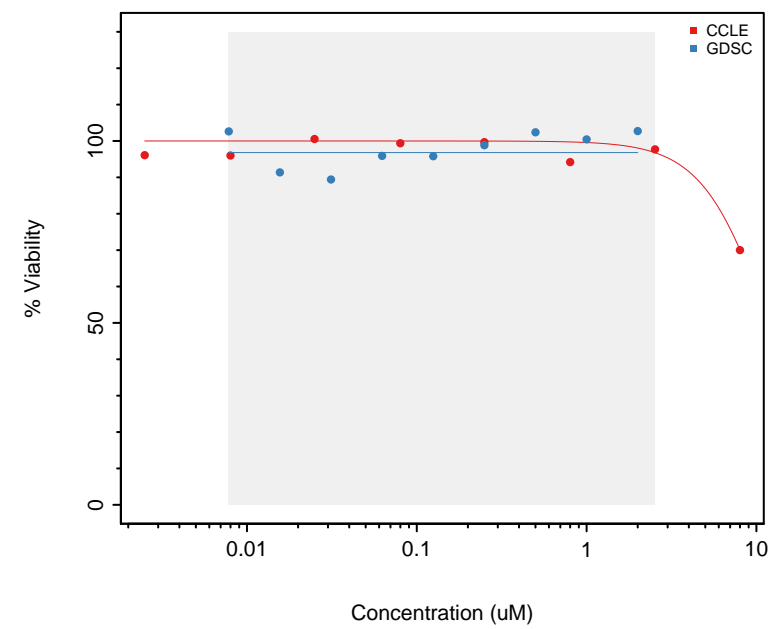

PHA-665752:UACC-812

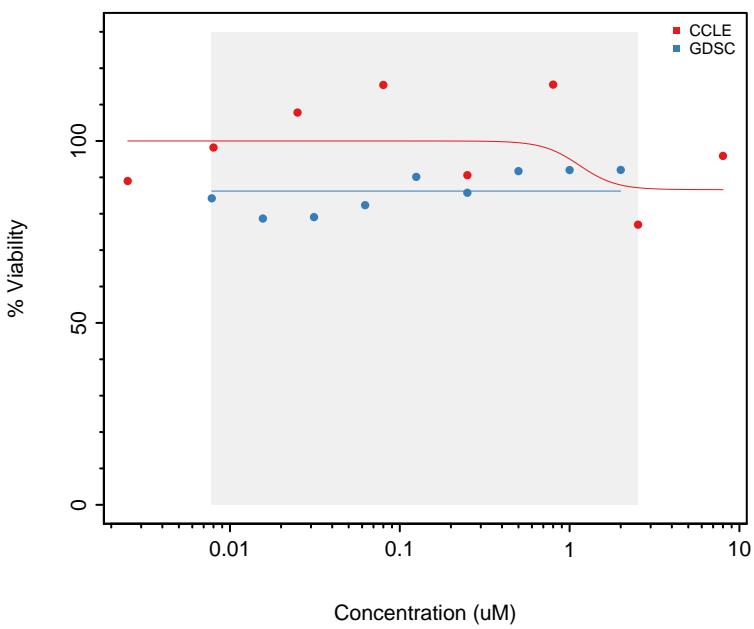

lapatinib:697

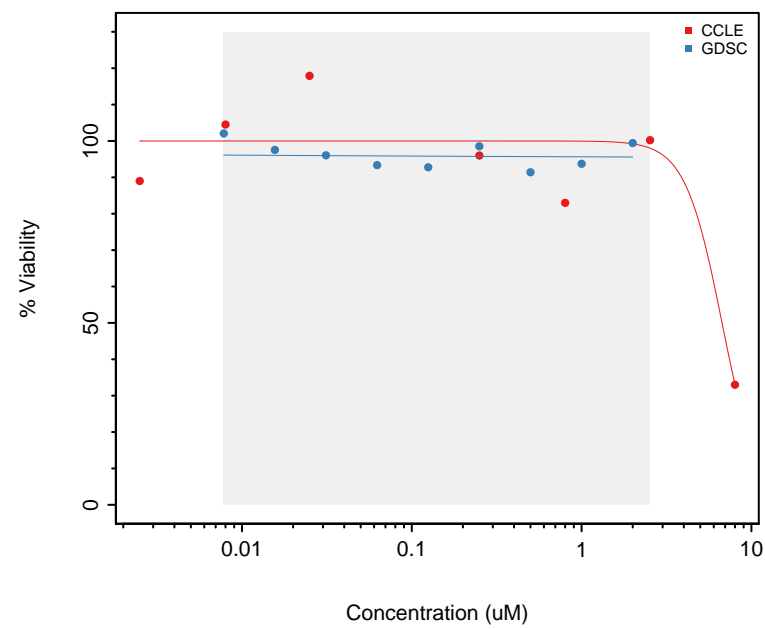

lapatinib:8-MG-BA

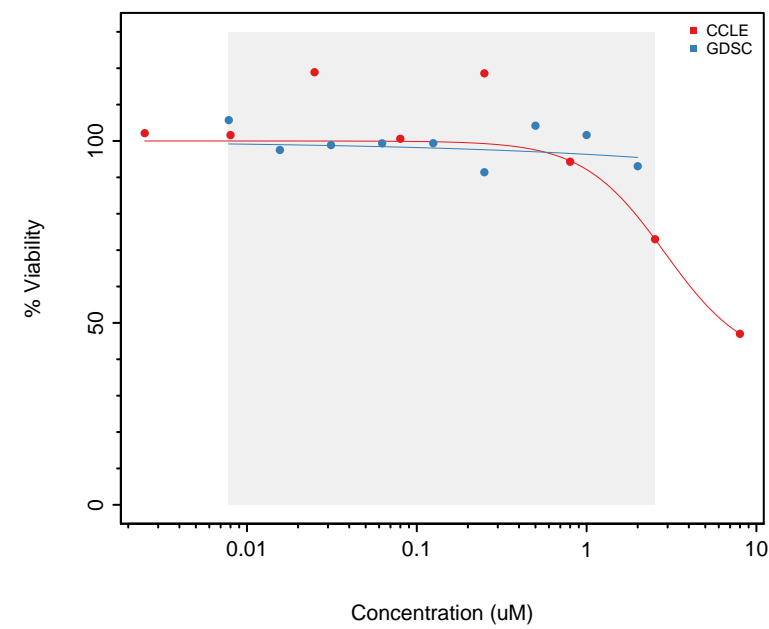

lapatinib:A253

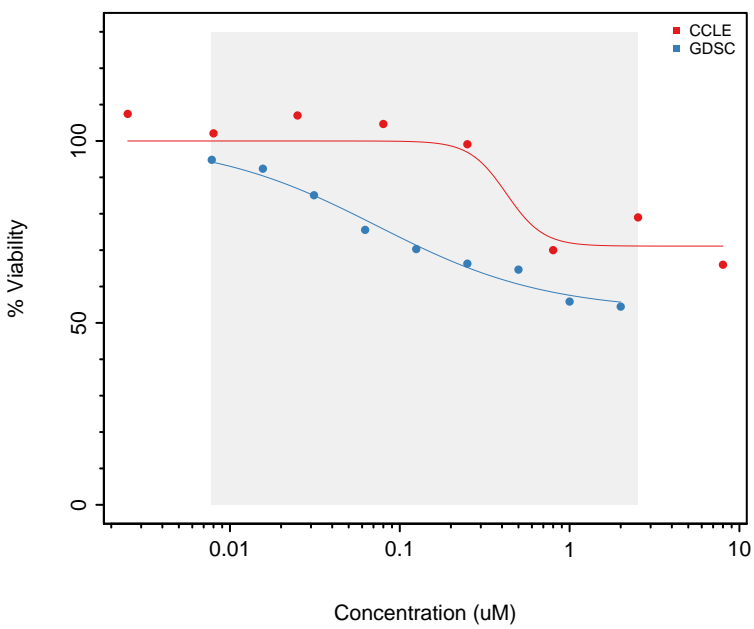

lapatinib:BL-41

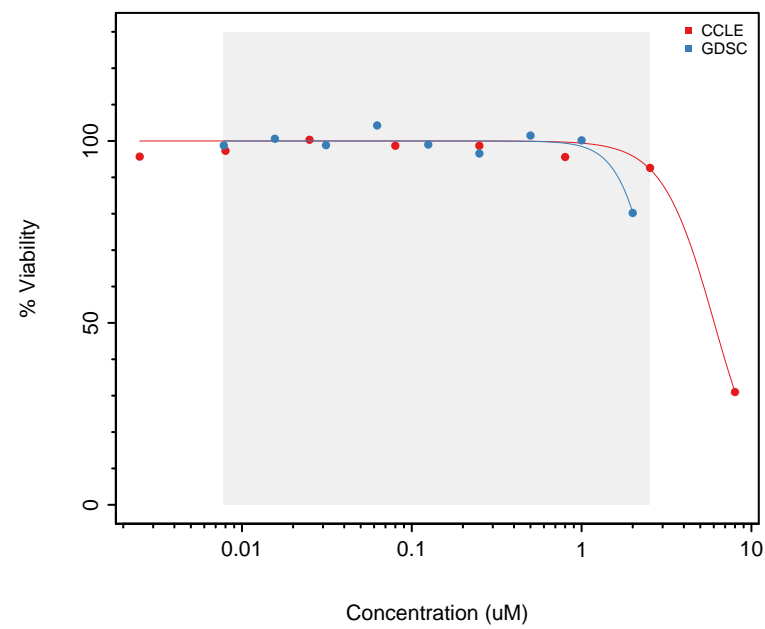

lapatinib:BL-70

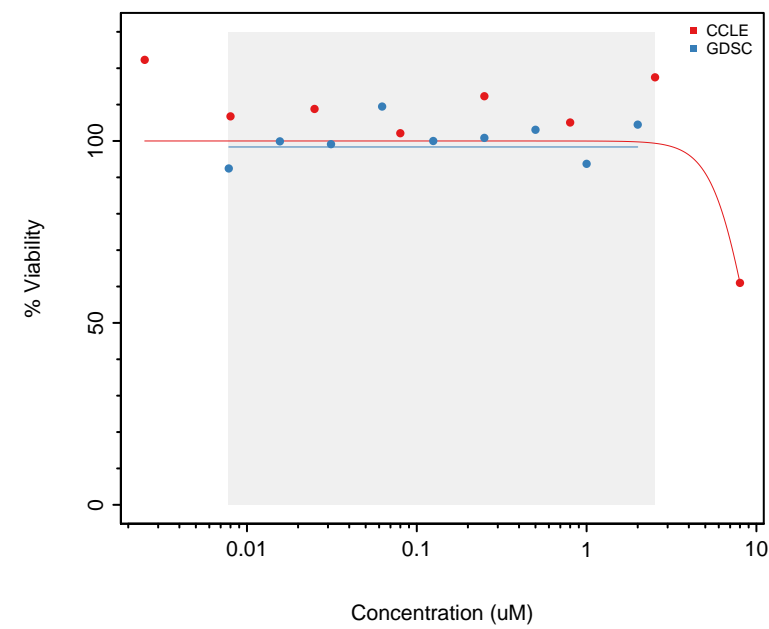



lapatinib:BT-474

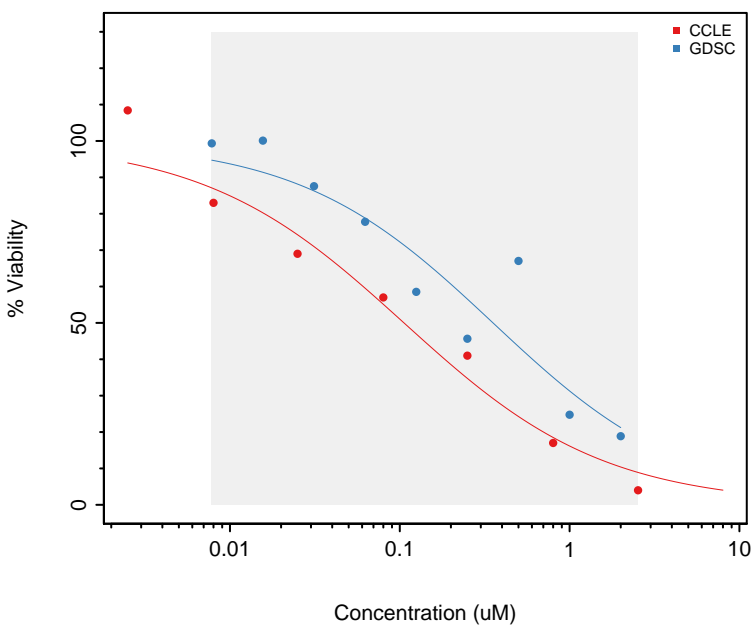

lapatinib:C2BBe1

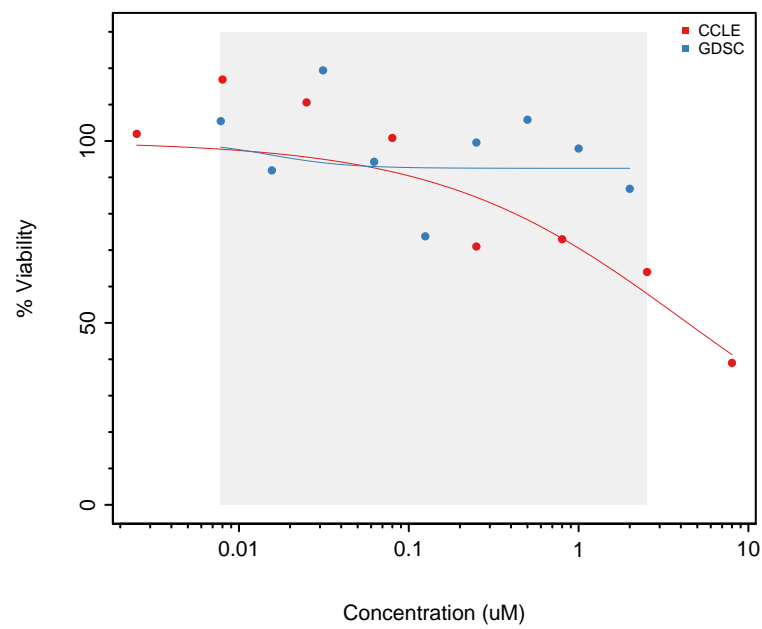

lapatinib:CAS-1

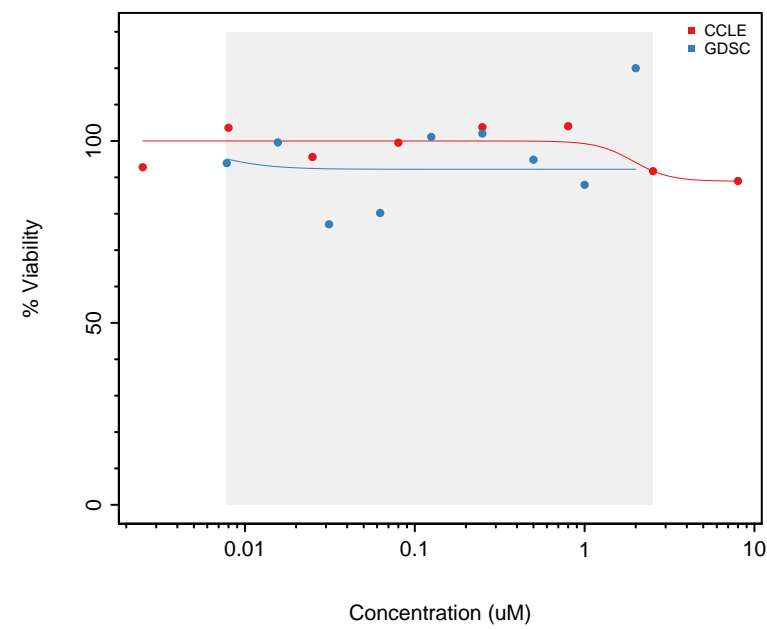

lapatinib:COLO-320-HSR

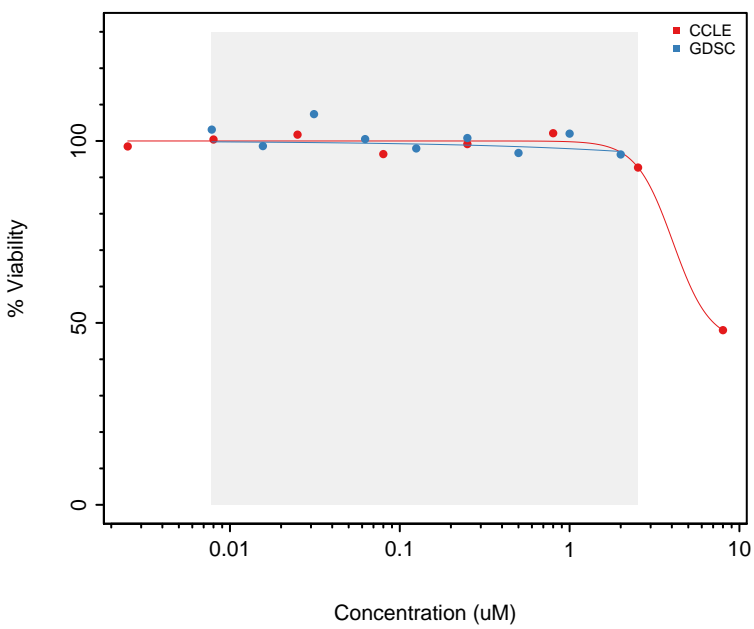

lapatinib:DEL

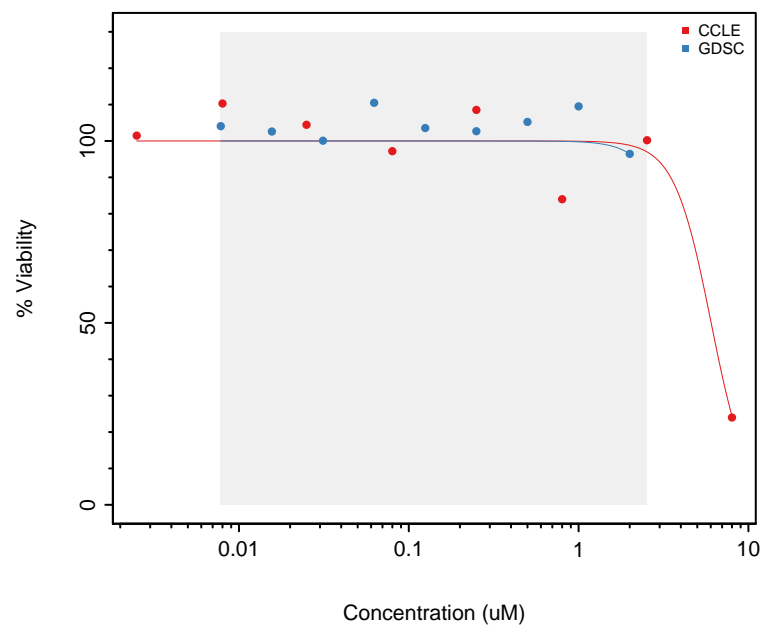

lapatinib:DMS-114

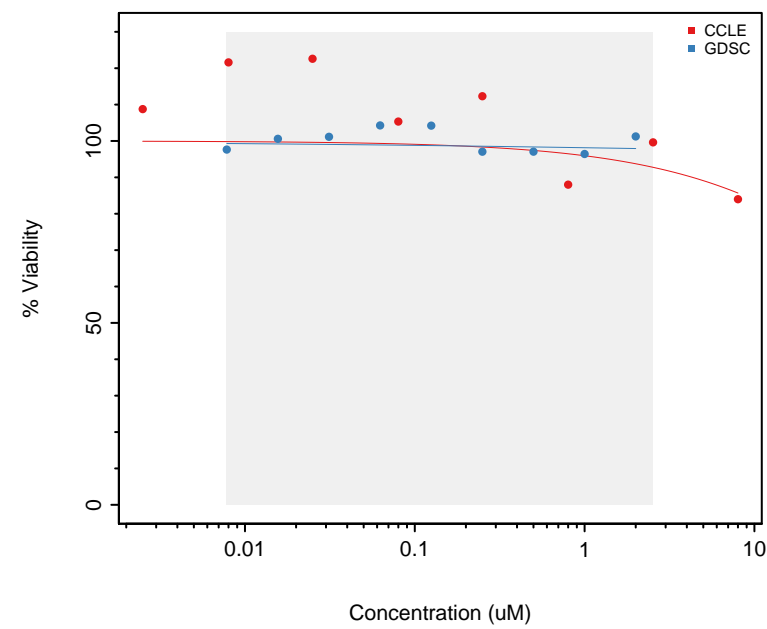

lapatinib:DOHH-2

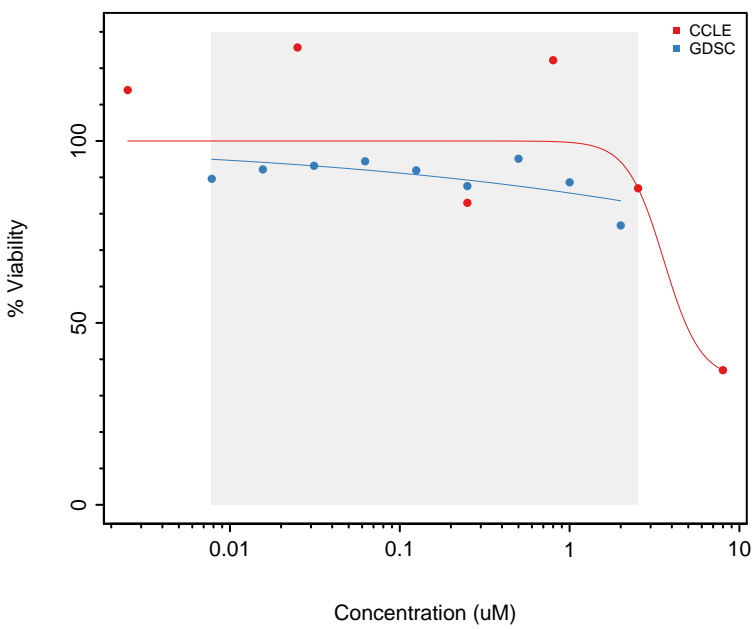

lapatinib:EB2

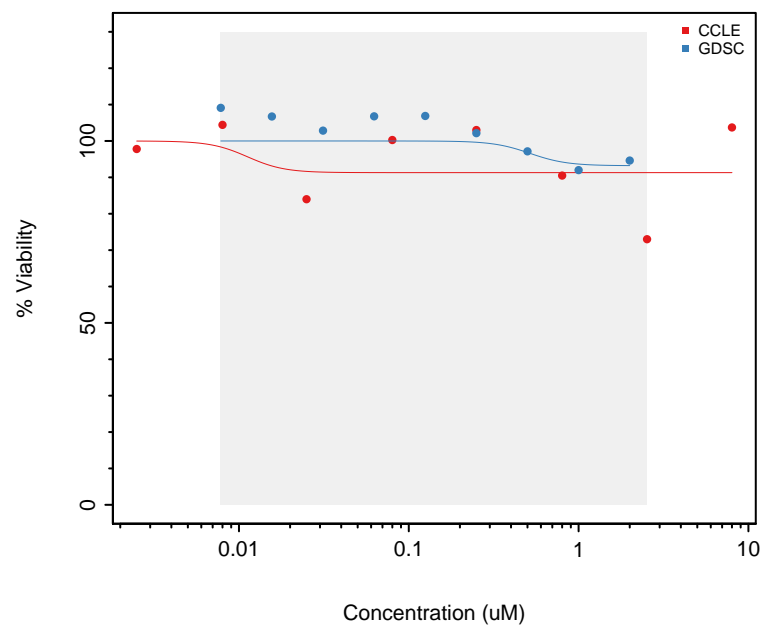

lapatinib:EM-2

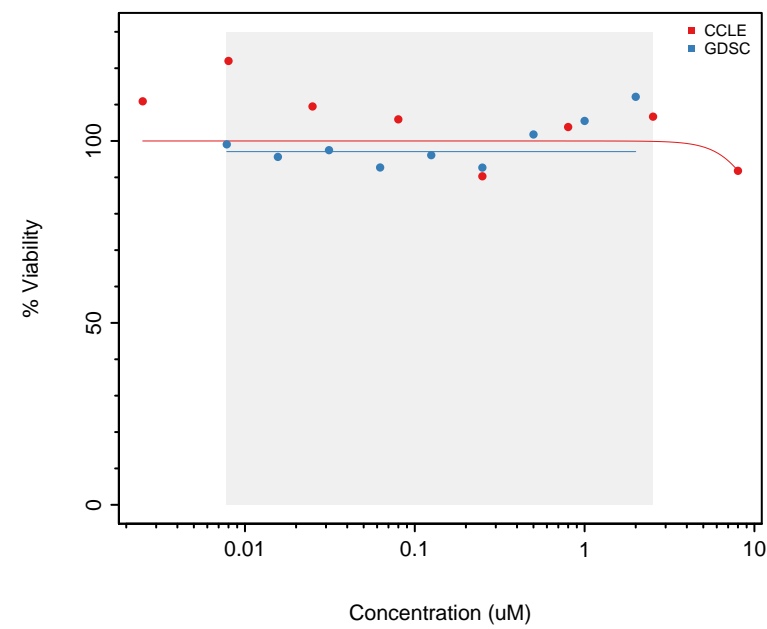

lapatinib:GB-1

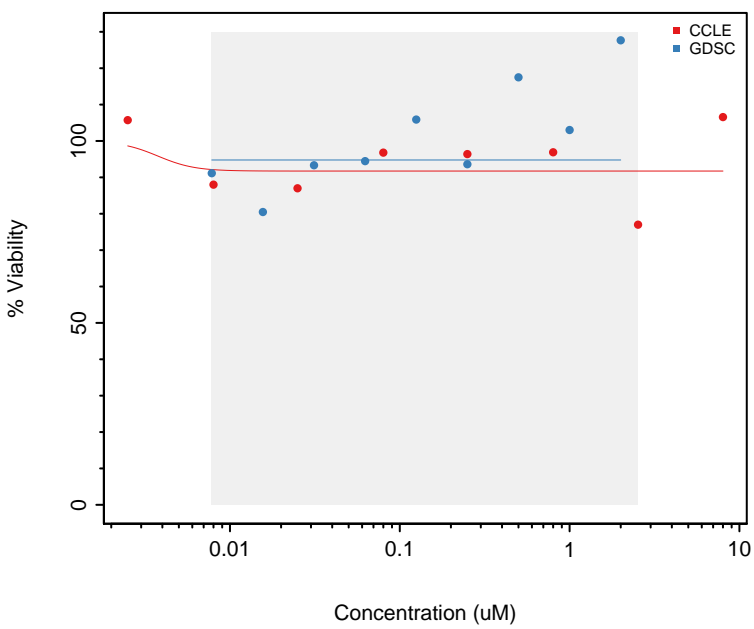

lapatinib:GCIY

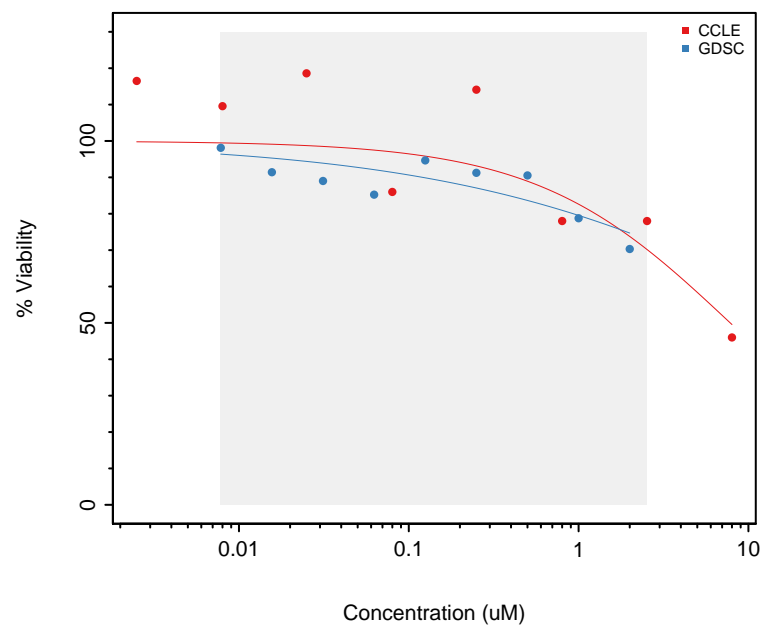

lapatinib:GI-1

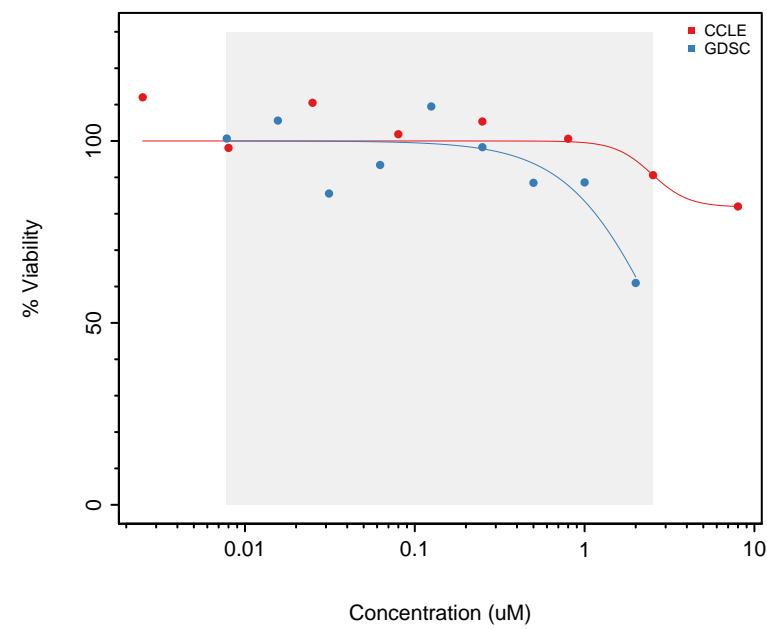







lapatinib:NCI-H747

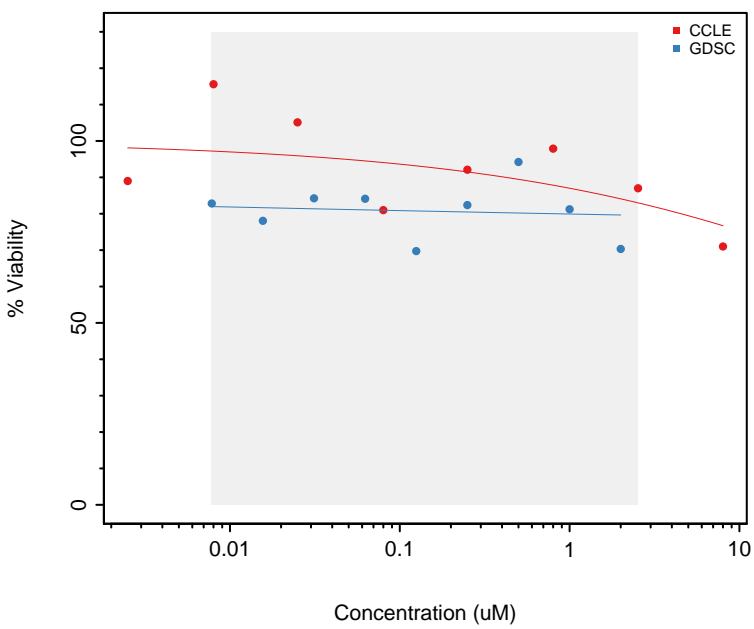

lapatinib:OCI-AML2

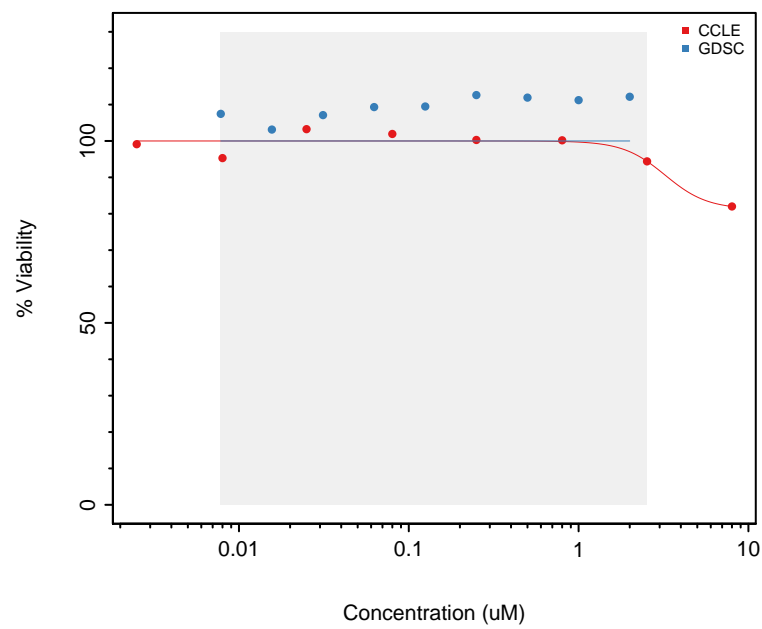

lapatinib:ONS-76

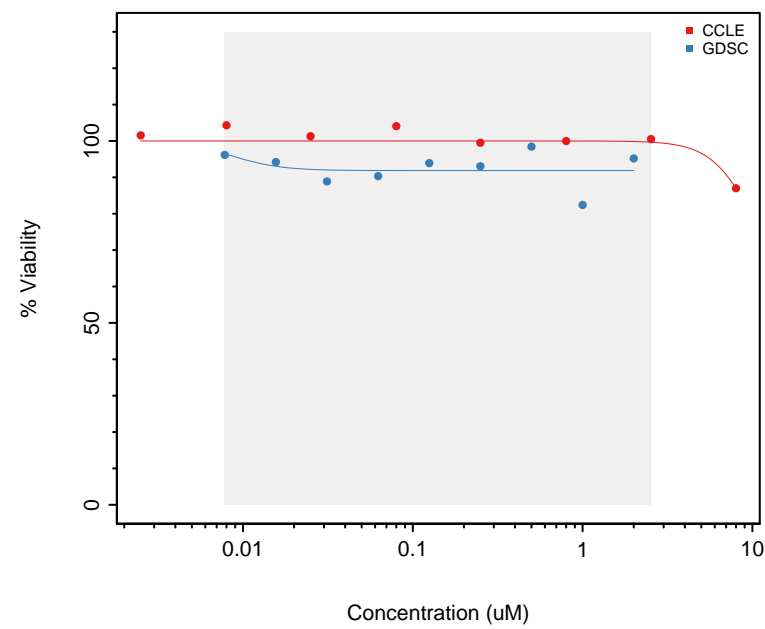

lapatinib:OPM-2

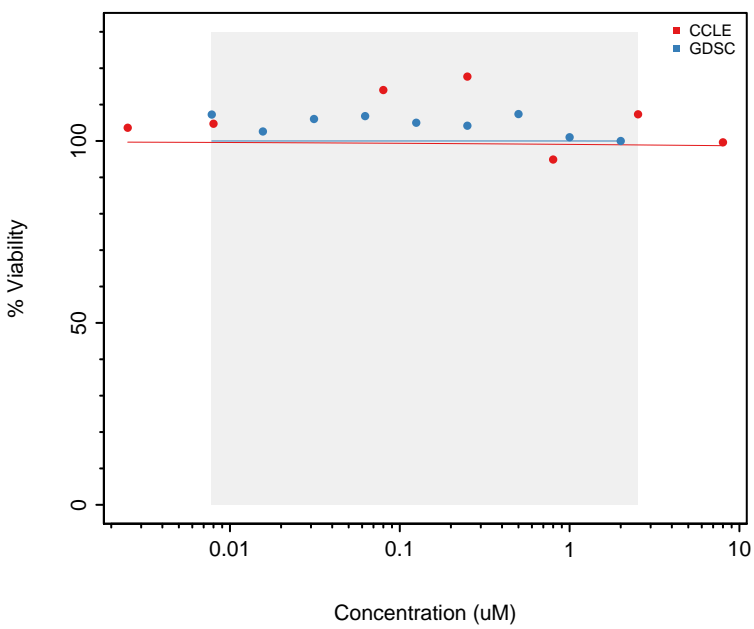

lapatinib:OVCA4-4

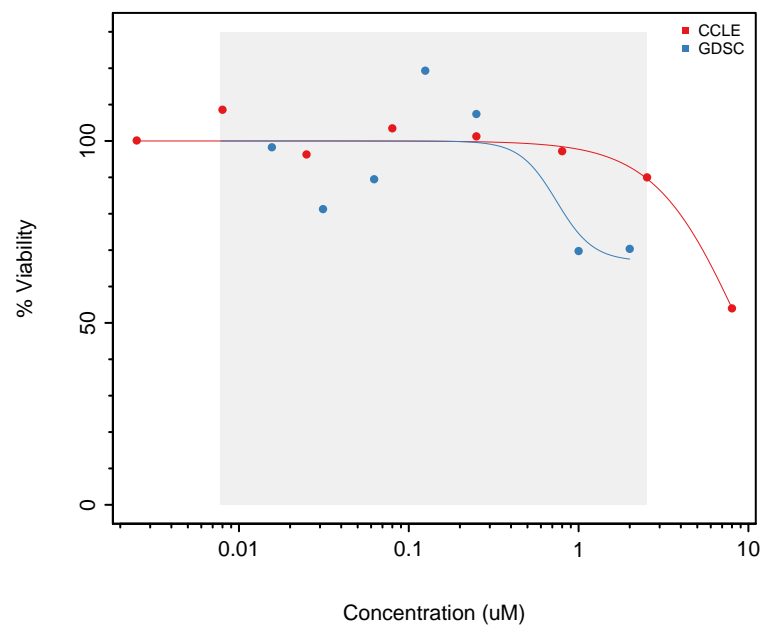

lapatinib:P31-FUJ

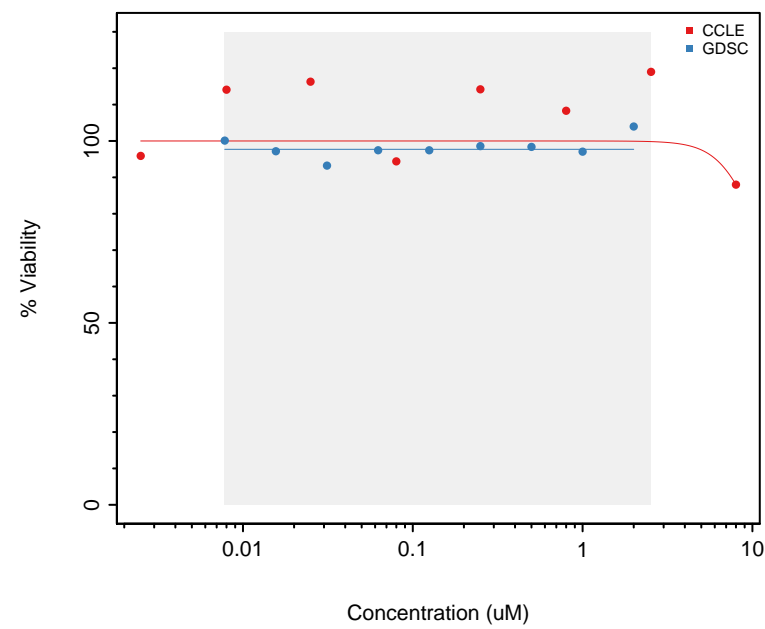

lapatinib:PSN1

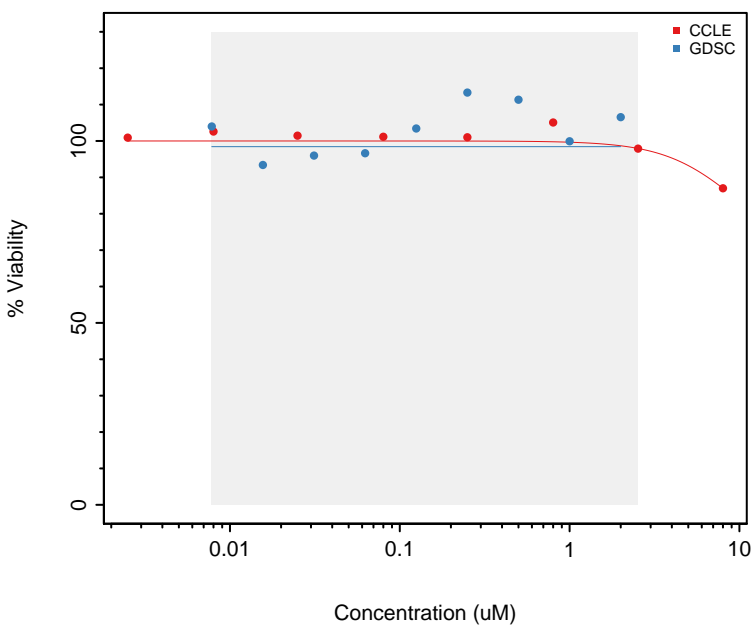

lapatinib:Raji

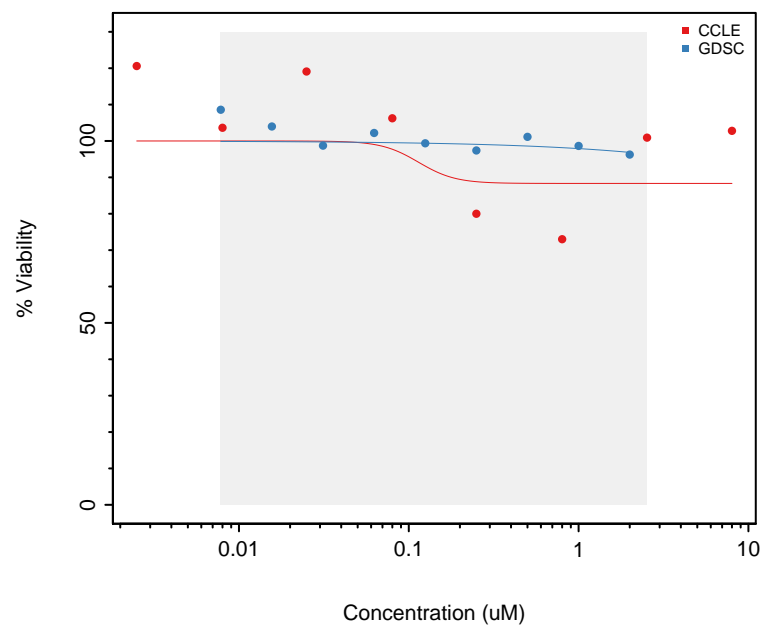

lapatinib:REH

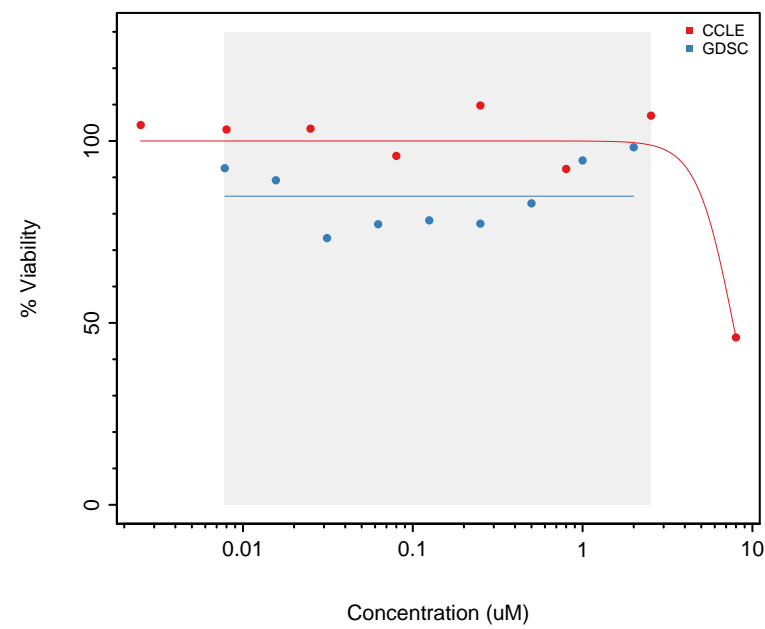

lapatinib:RKO

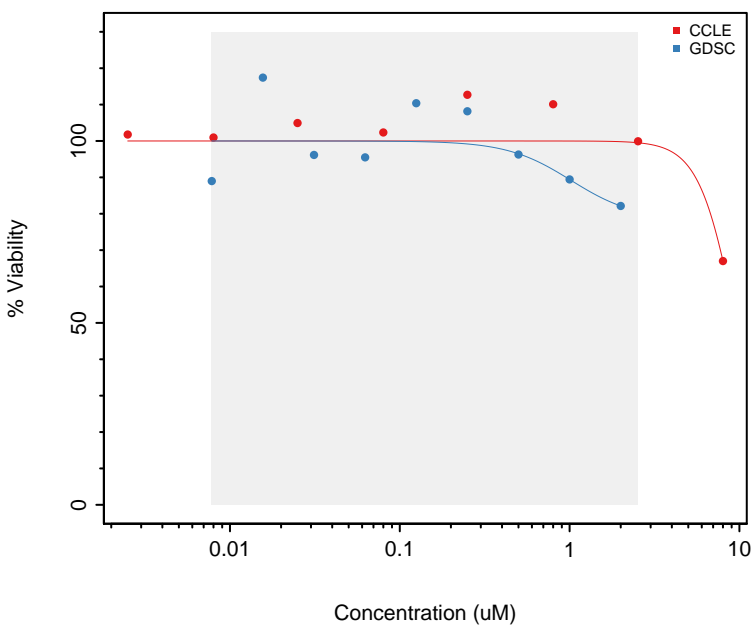

lapatinib:RL95-2

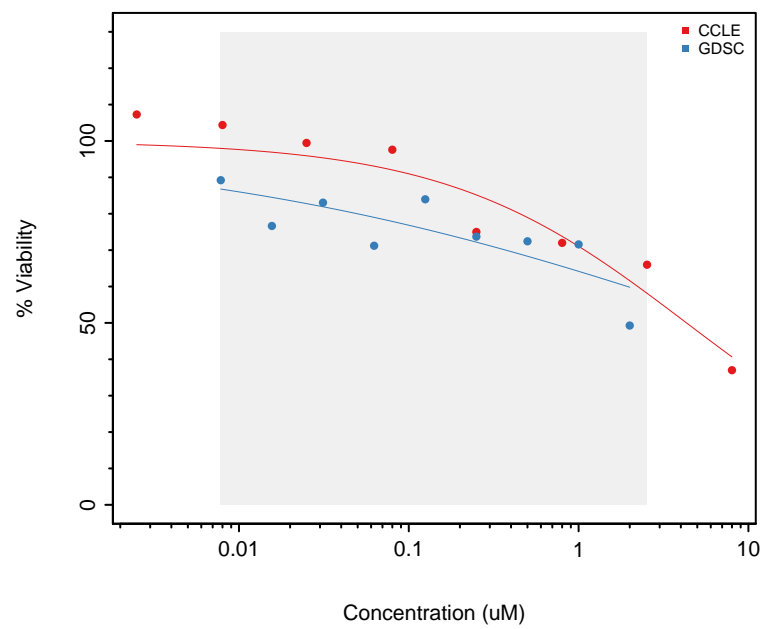

lapatinib:RPMI-8402

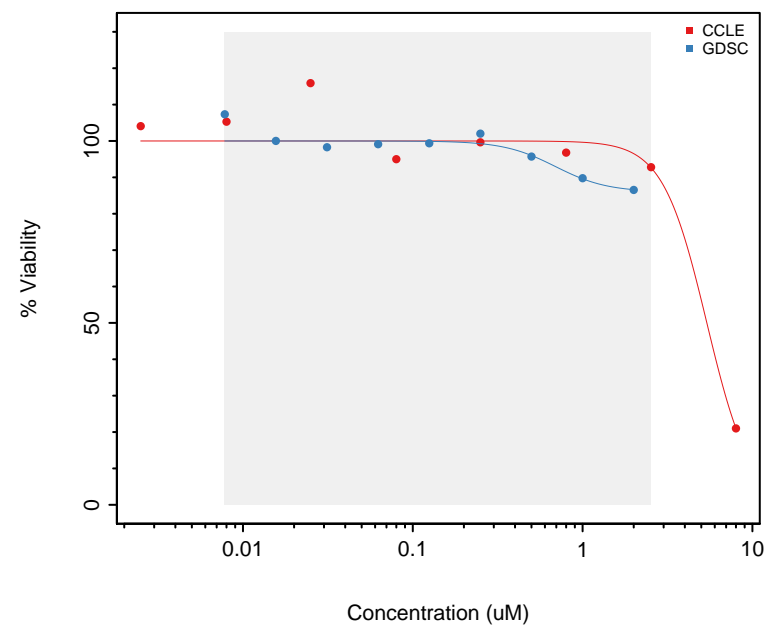



lapatinib:SUP-T1

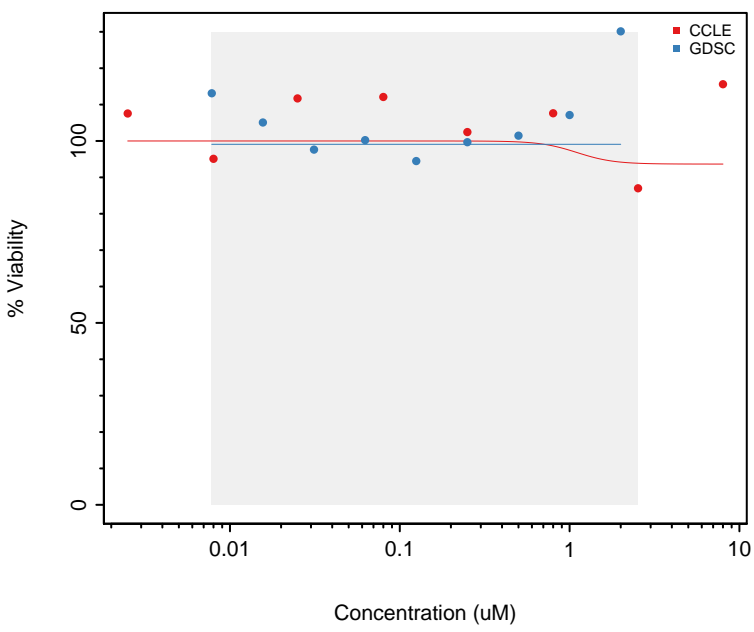

lapatinib:TE-1

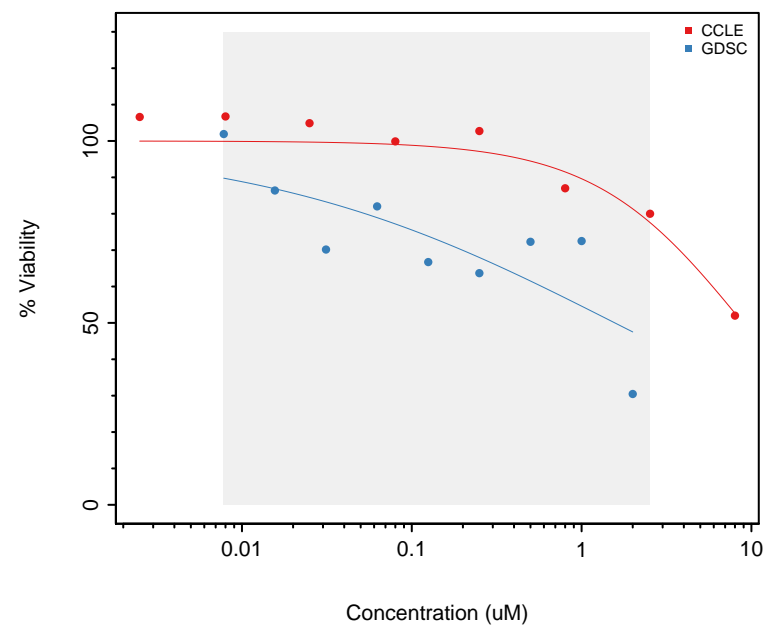

lapatinib:TE-15

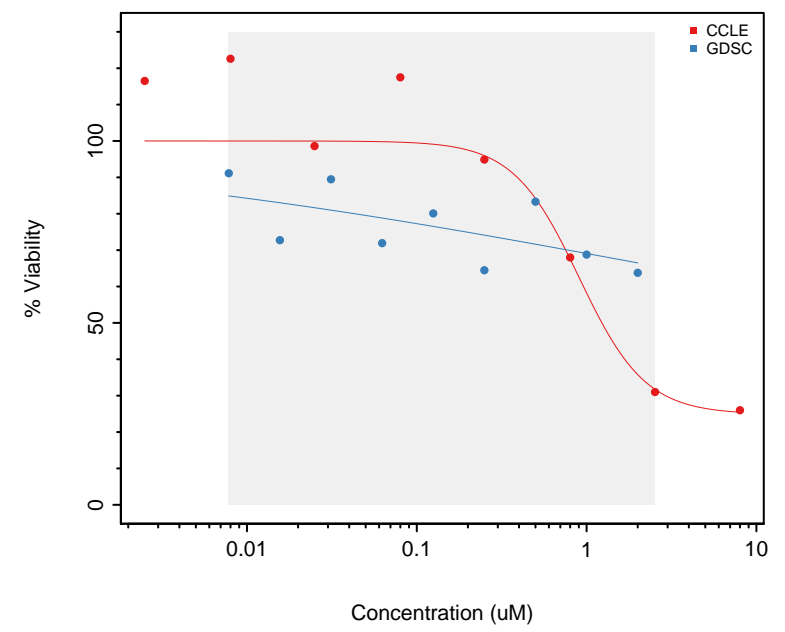

lapatinib:TE-5

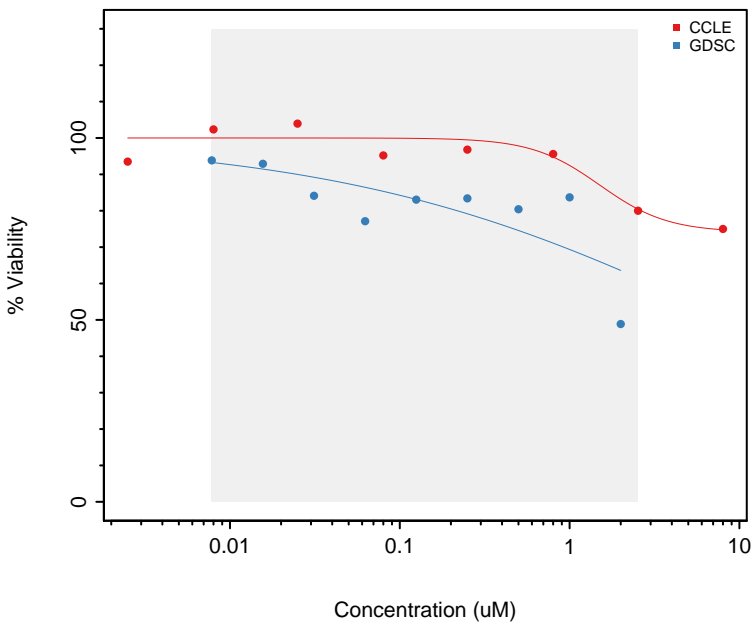

lapatinib:TE-9

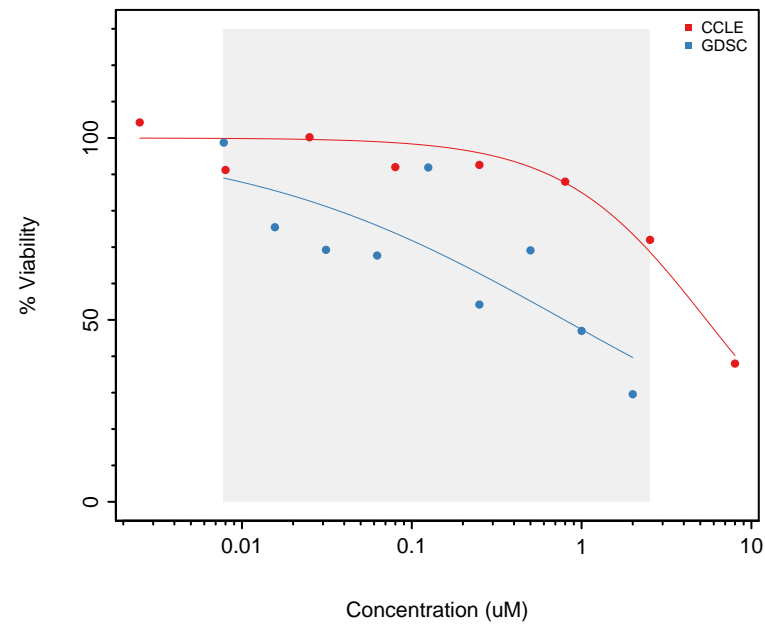

lapatinib:U-87-MG

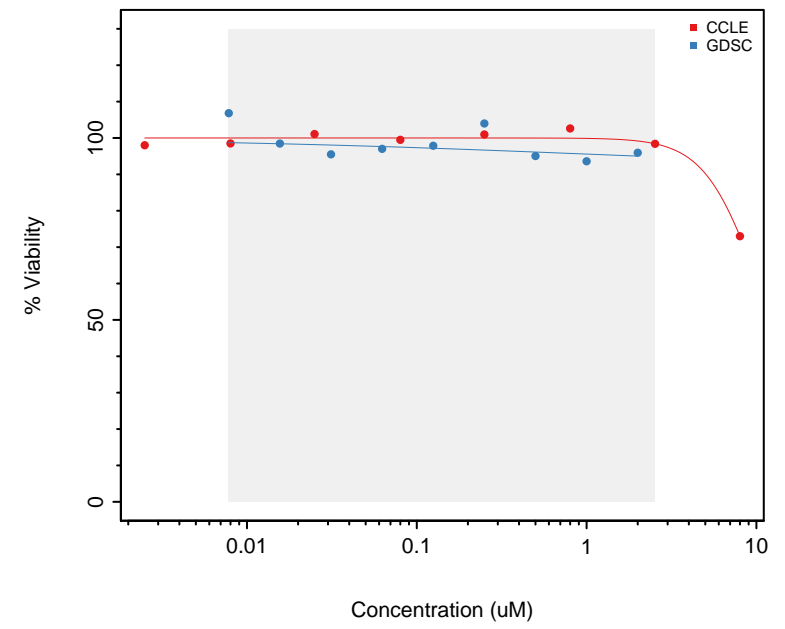

lapatinib:UACC-257

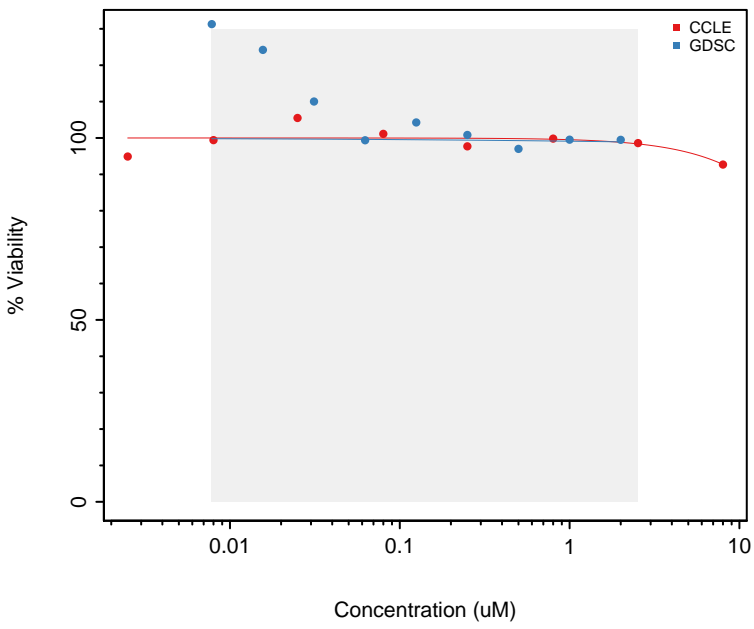

lapatinib:UACC-812

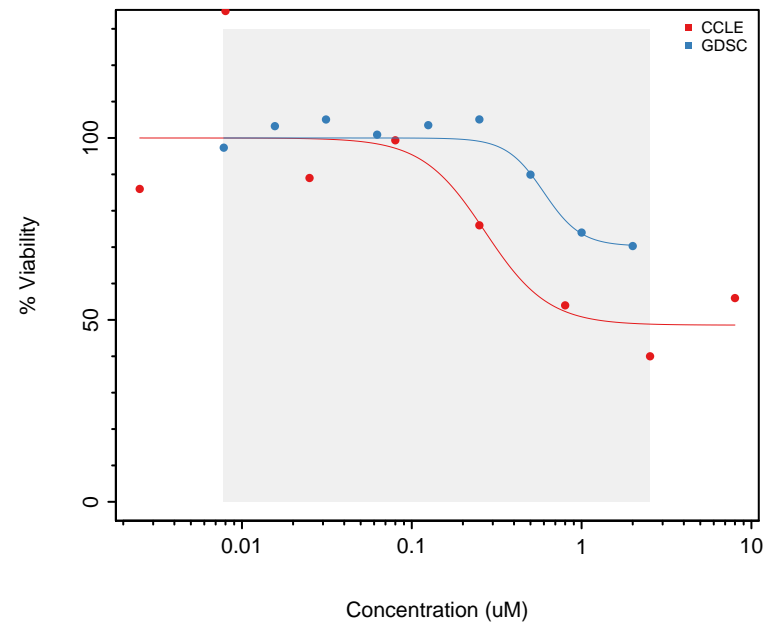

Nutlin-3:22RV1

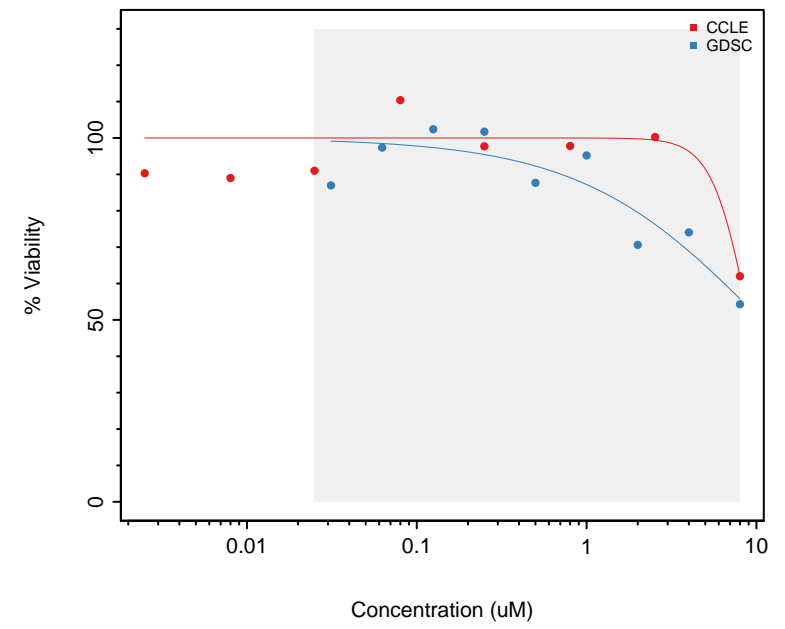

Nutlin-3:639-V

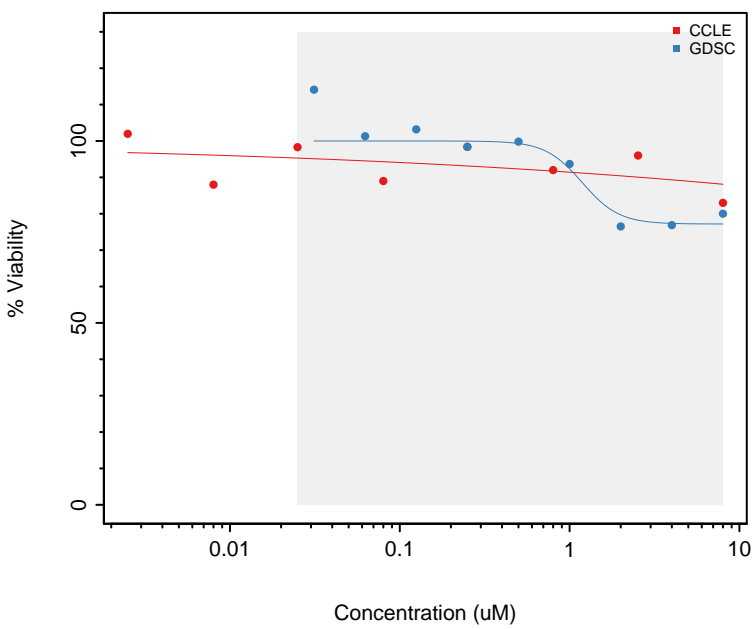

Nutlin-3:697

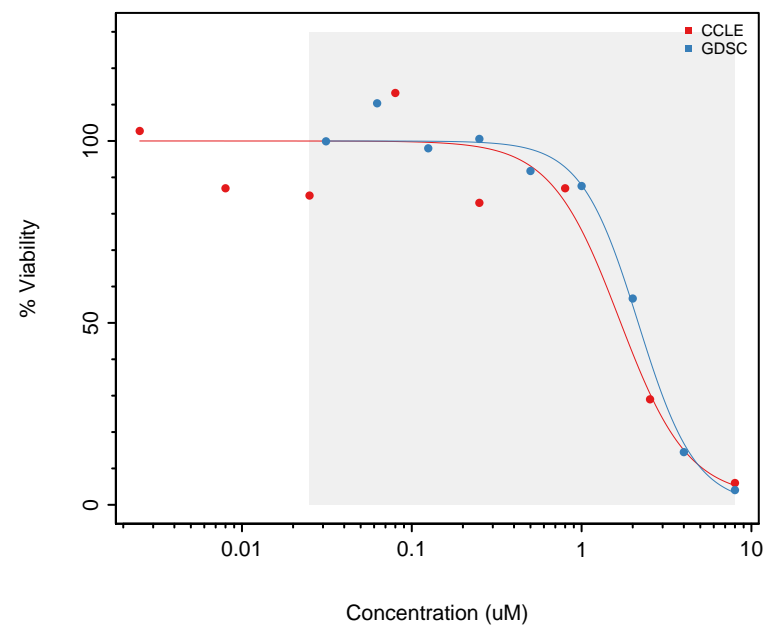

Nutlin-3:769-P

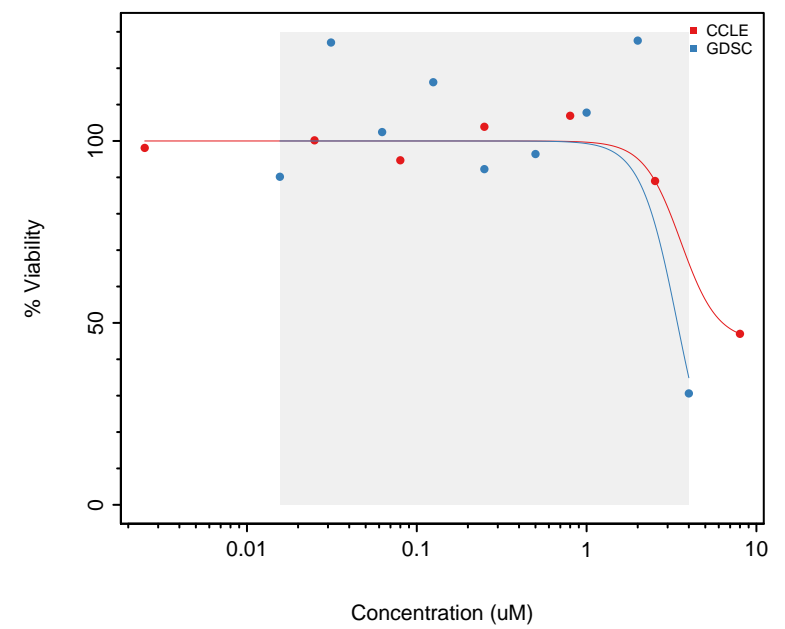





Nutlin-3:ACHN

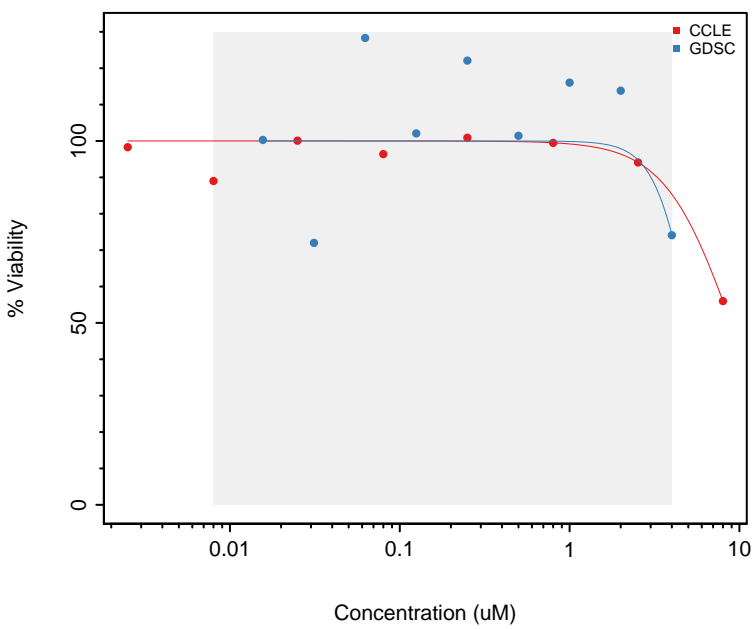

Nutlin-3:AsPC-1

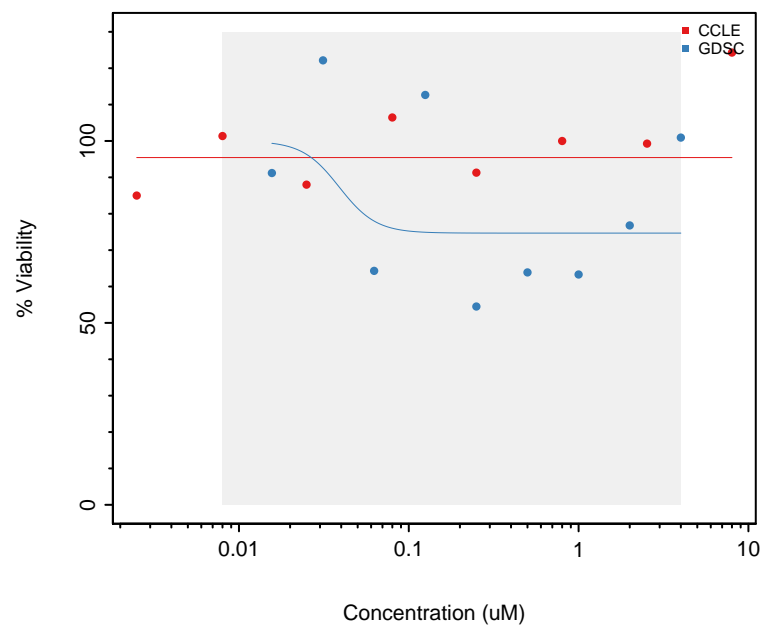

Nutlin-3:AU565

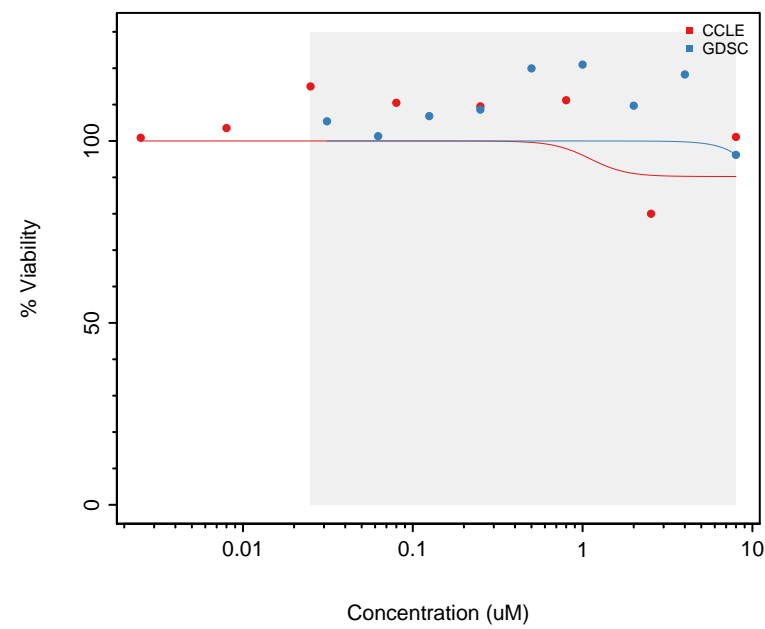

Nutlin-3:BCPAP

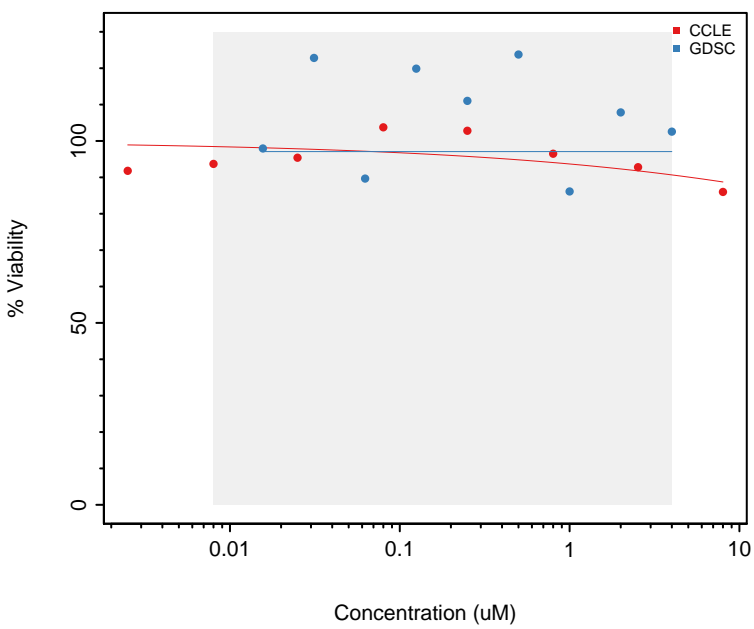

Nutlin-3:BTFC-909

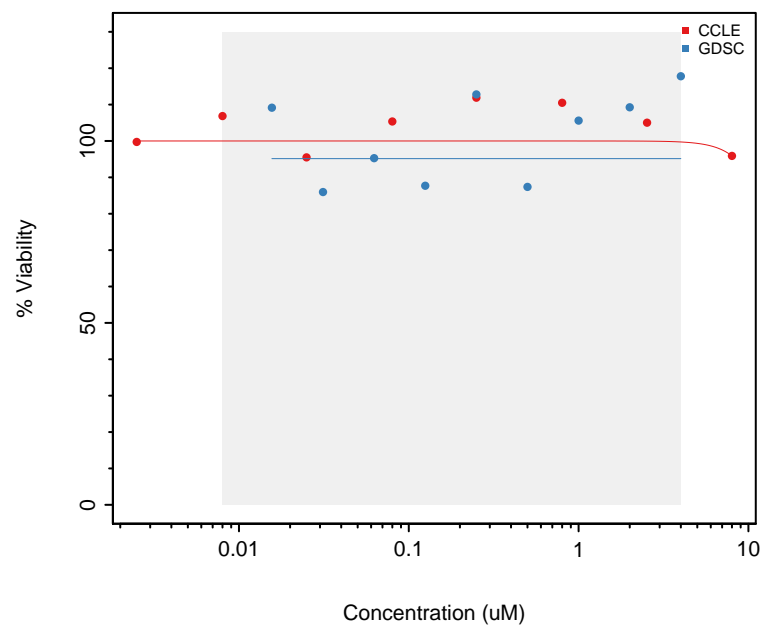

Nutlin-3:BL-41

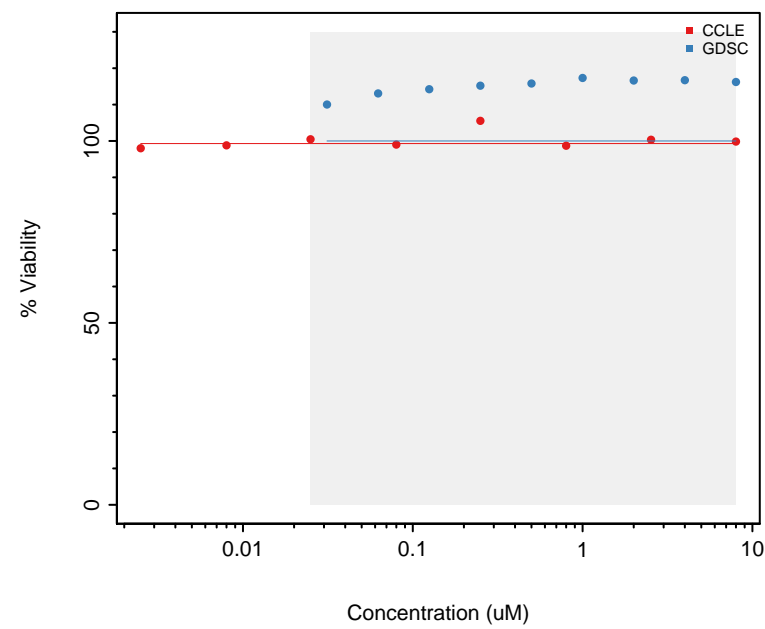

Nutlin-3:BT-20

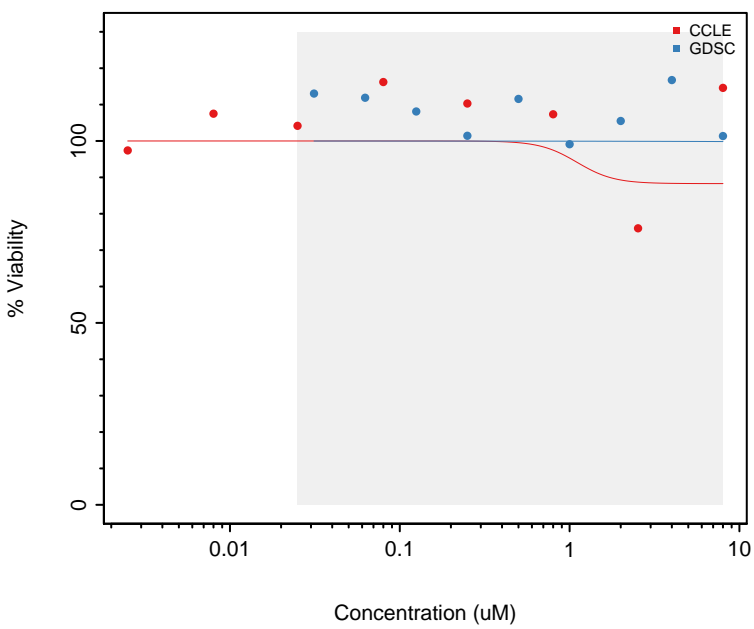

Nutlin-3:BT-549

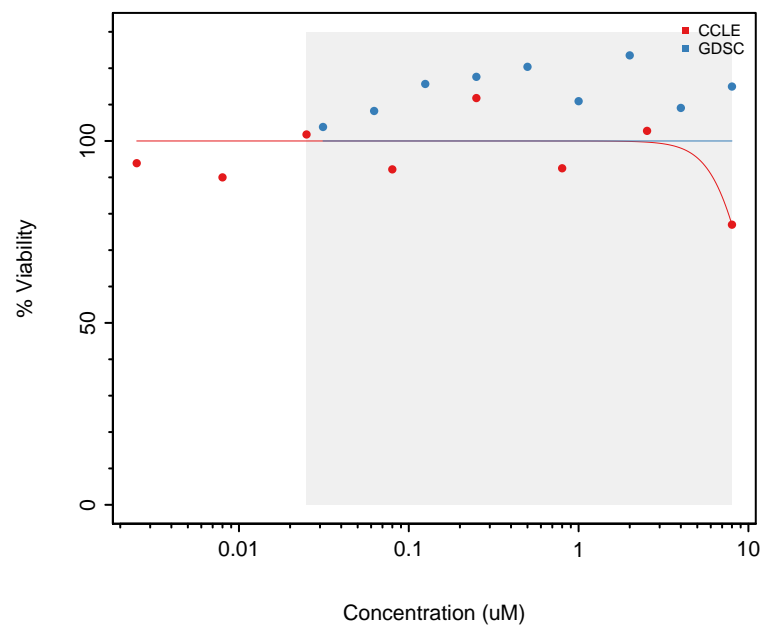

Nutlin-3:C2BBe1

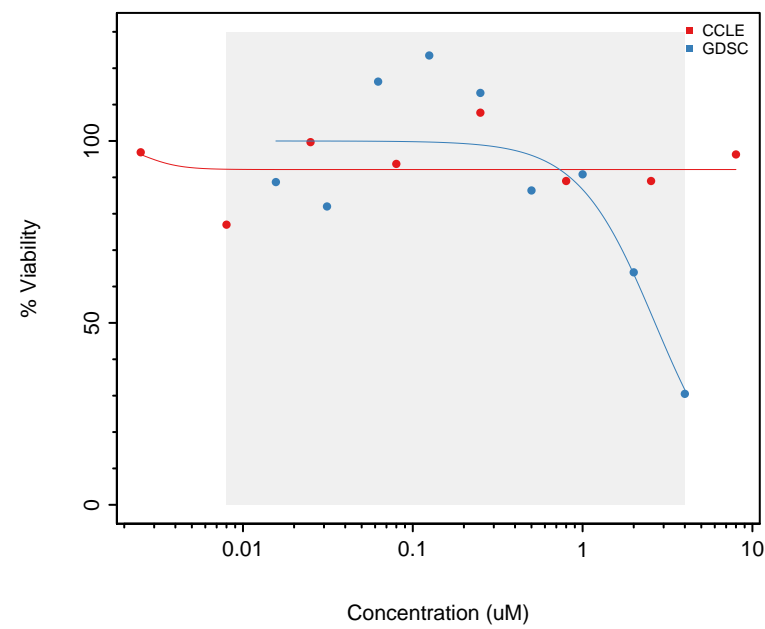

Nutlin-3:C32

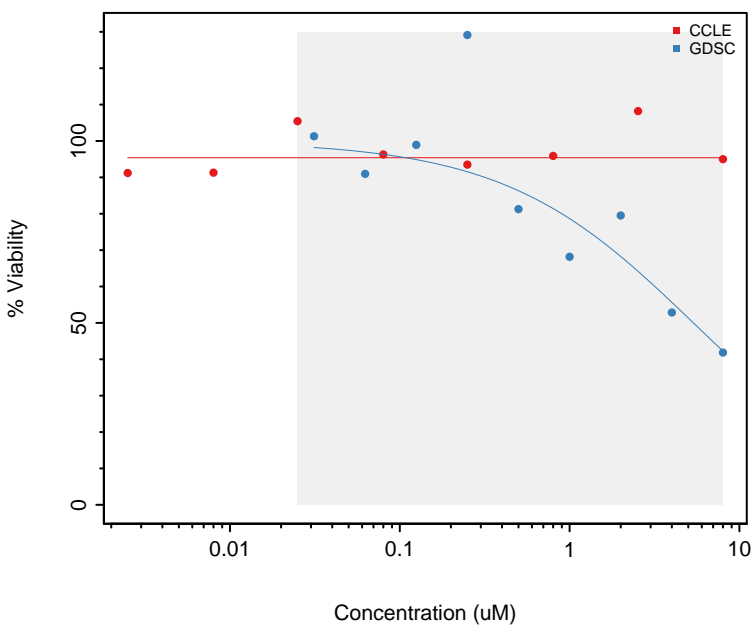

Nutlin-3:C3A

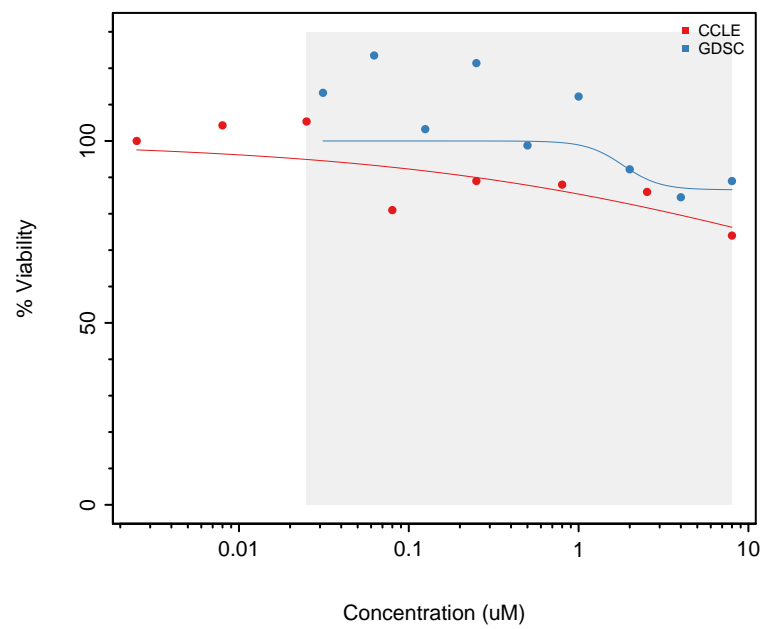

Nutlin-3:CAL-12T

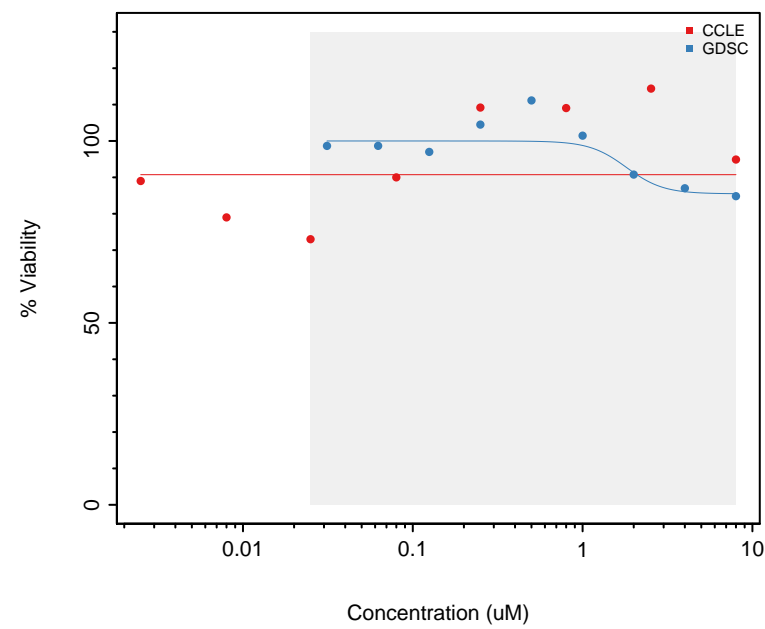



Nutlin-3:COLO-679

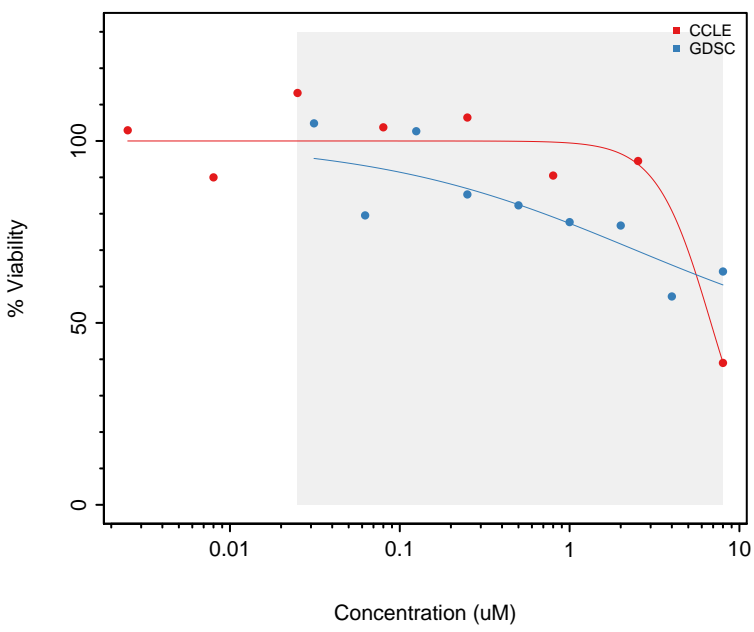

Nutlin-3:COLO-741

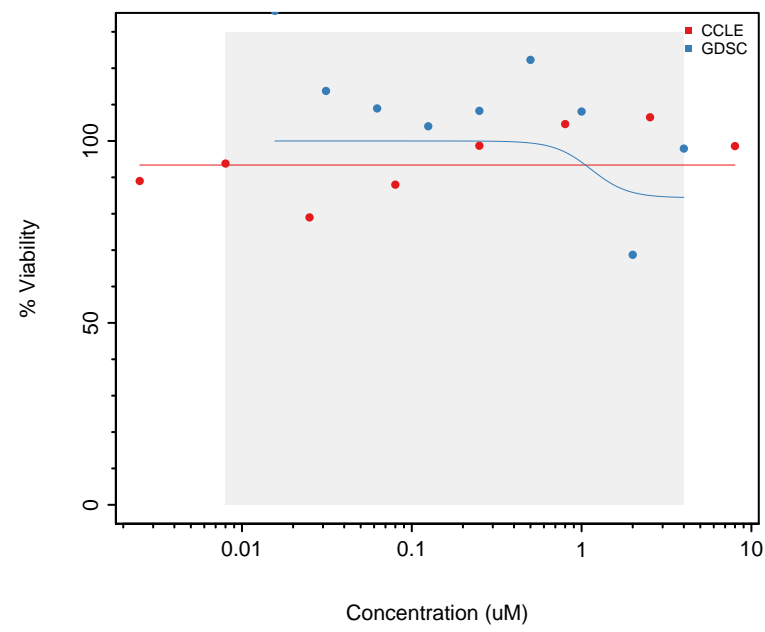

Nutlin-3:COR-L105

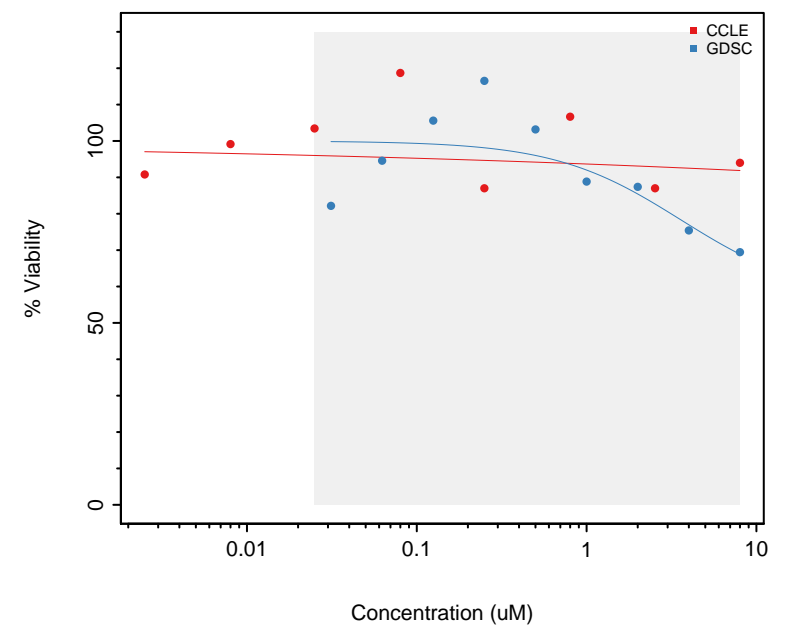

Nutlin-3:COR-L23

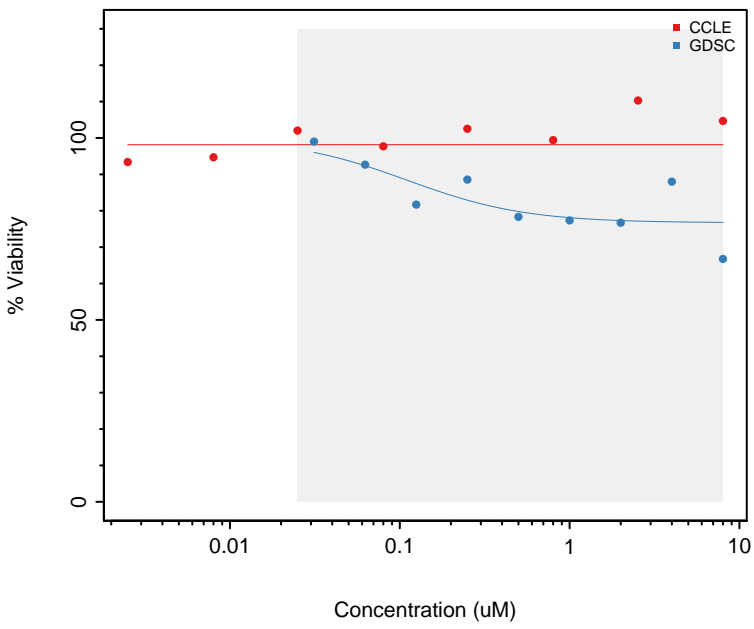

Nutlin-3:Daoy

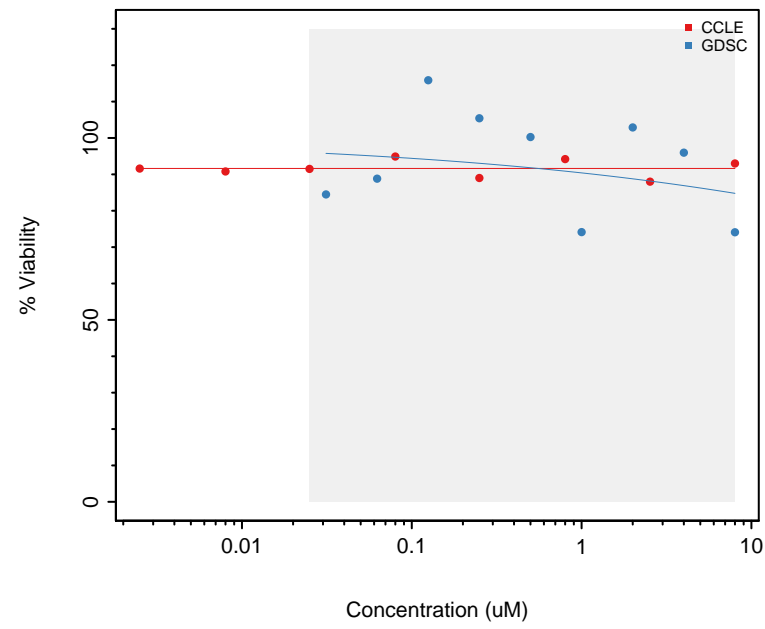

Nutlin-3:DBTRG-05MG

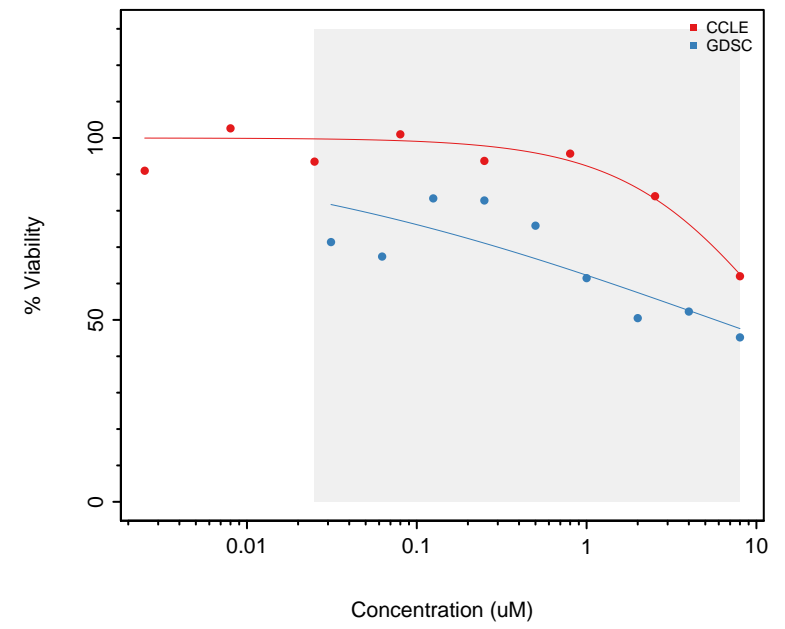

Nutlin-3:DEL

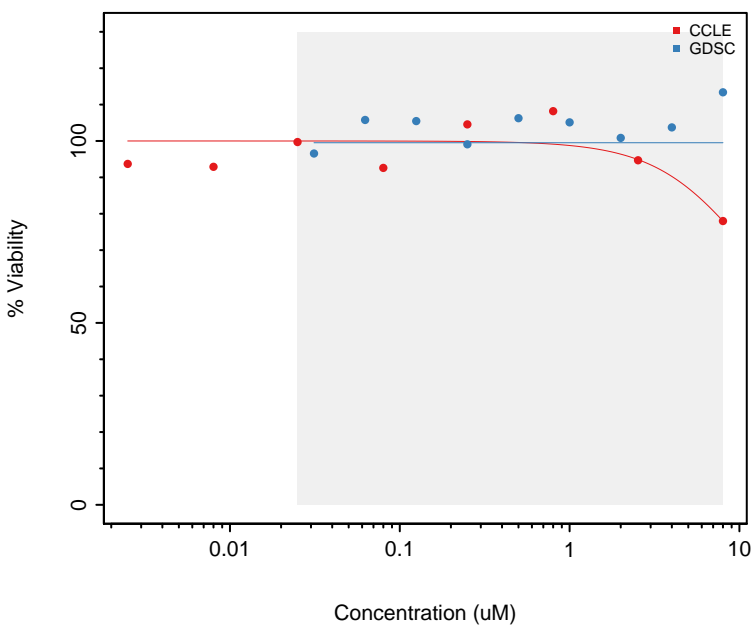

Nutlin-3:Detroit562

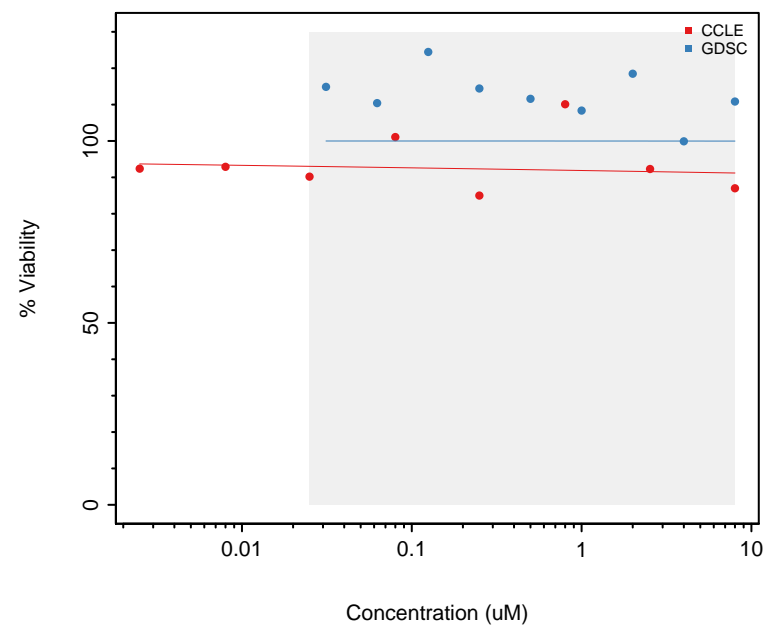

Nutlin-3:DK-MG

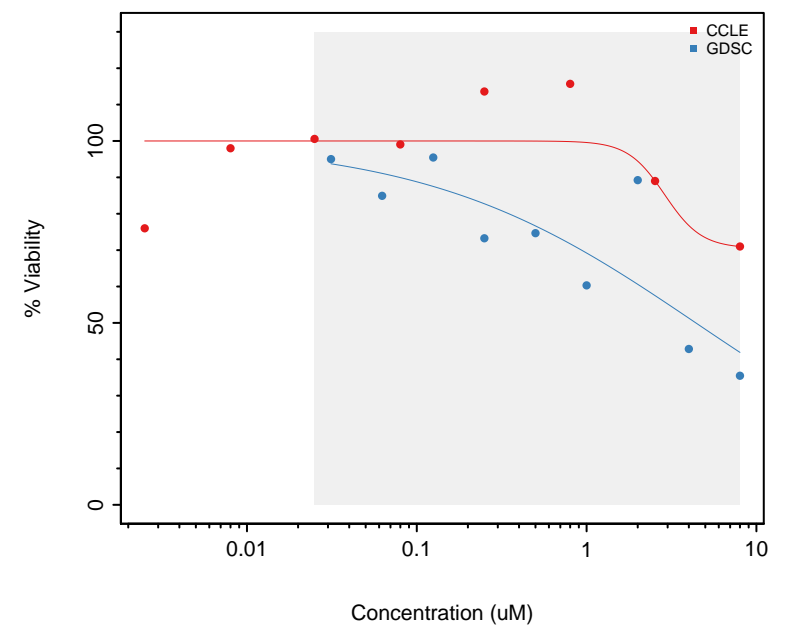

Nutlin-3:DMS-114

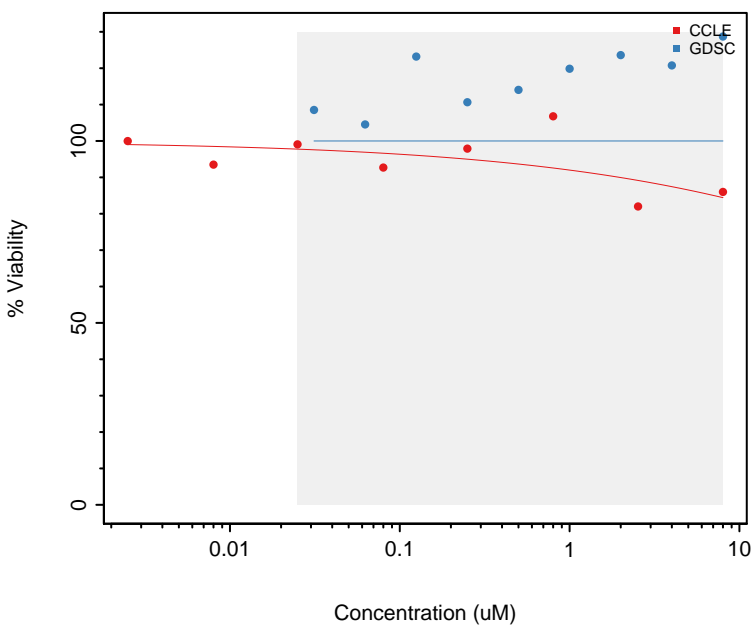

Nutlin-3:DOHH-2

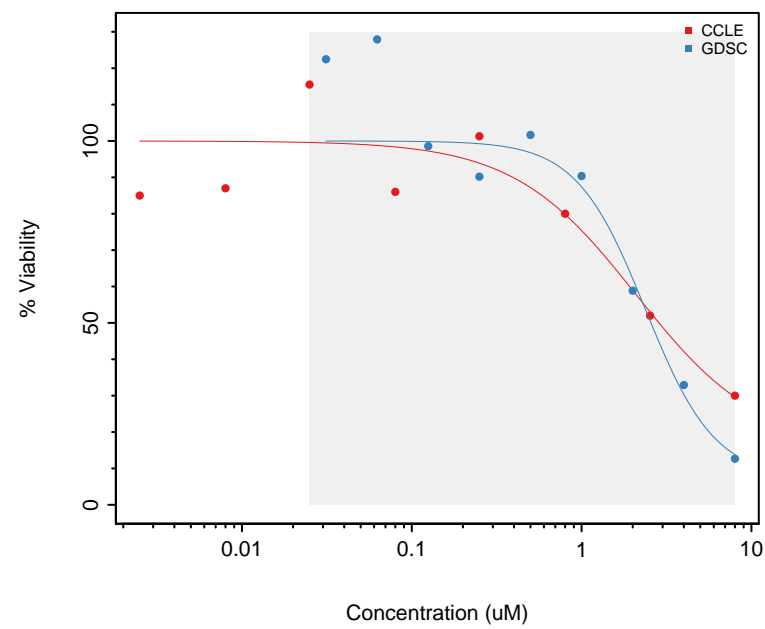

Nutlin-3:DU-145

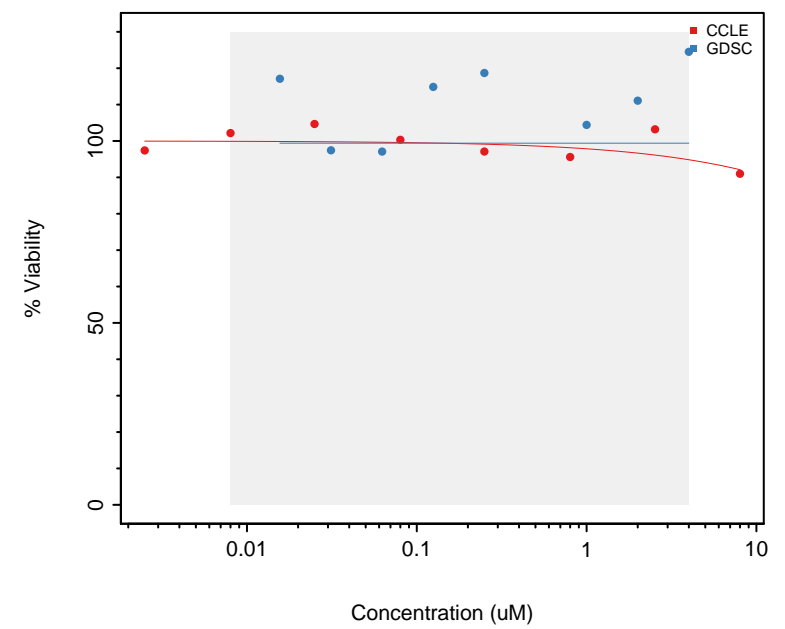

**Nutlin-3:EB2**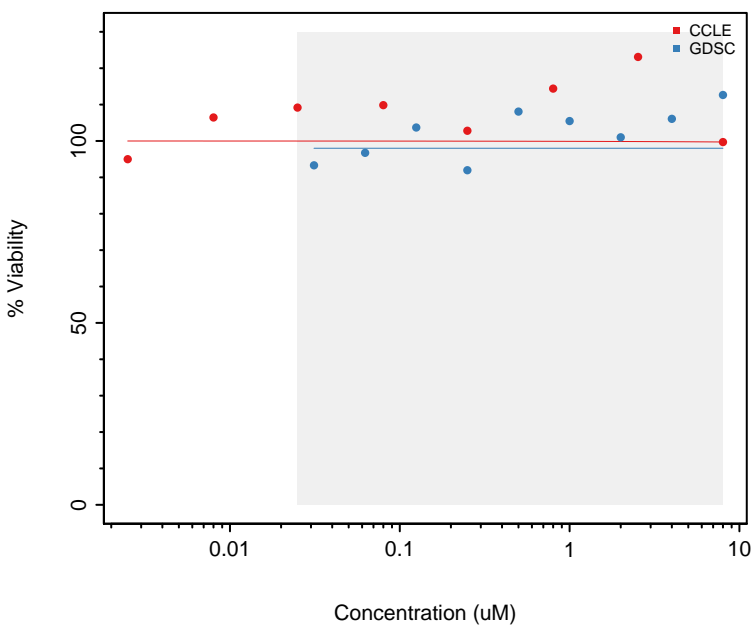**Nutlin-3:EFE-184**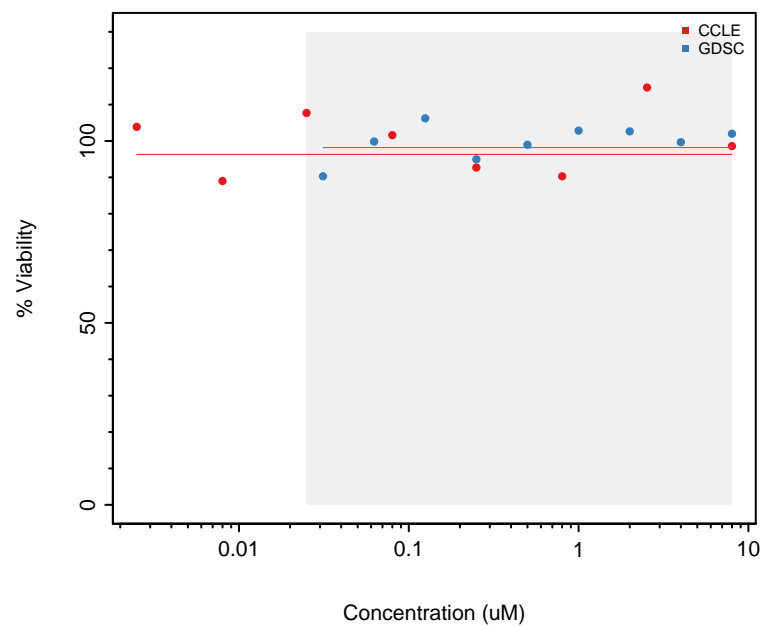**Nutlin-3:EFO-21**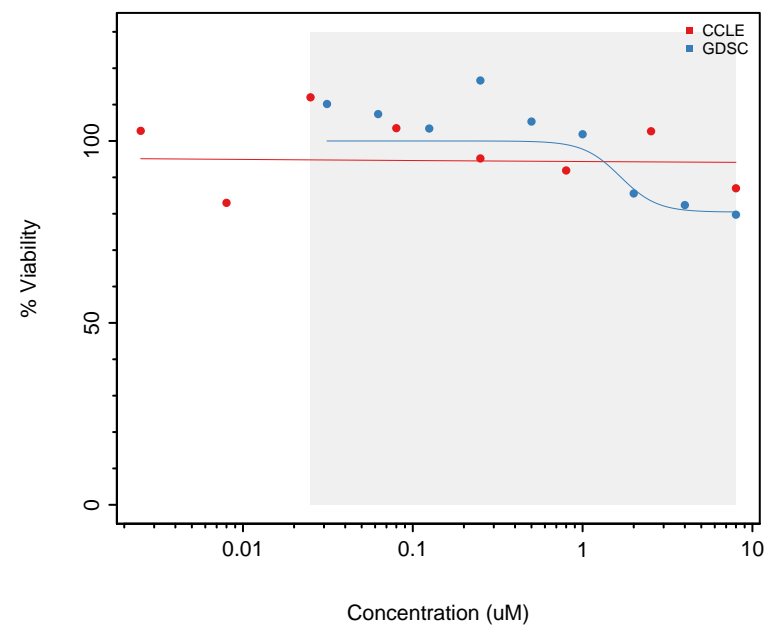**Nutlin-3:EFO-27**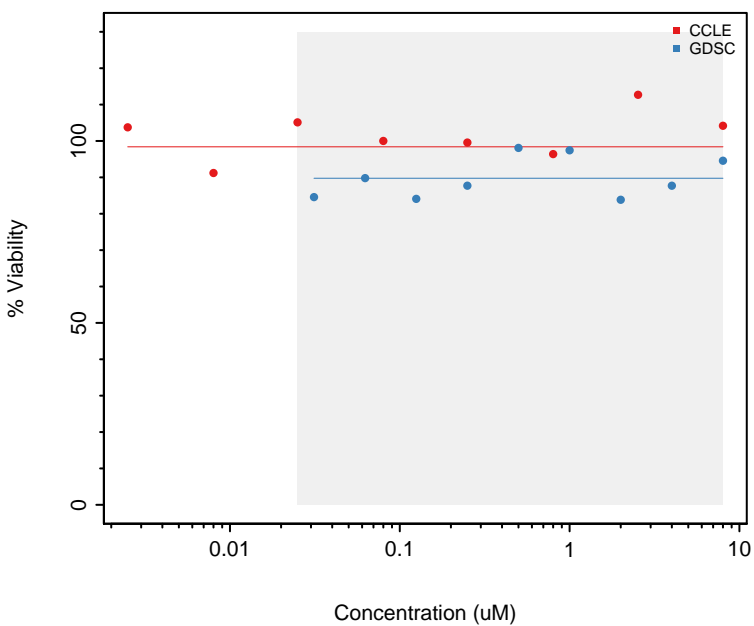**Nutlin-3:EM-2**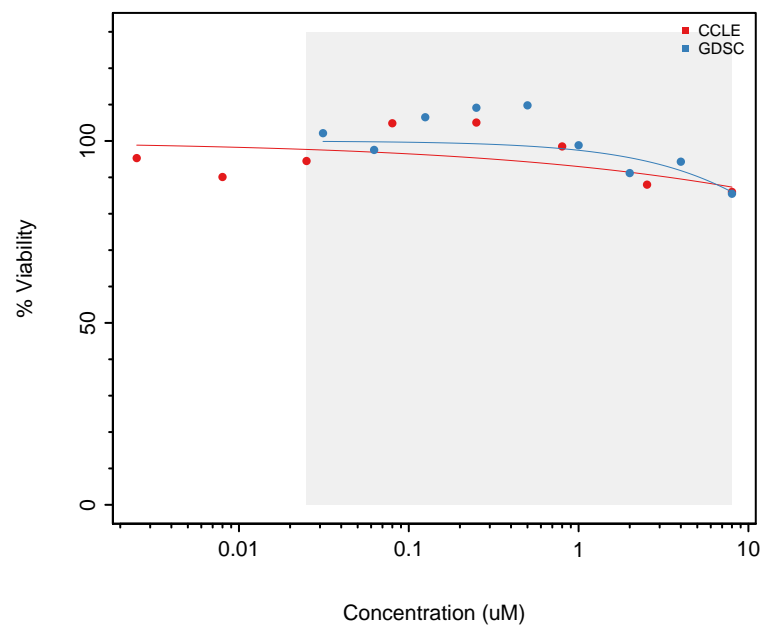**Nutlin-3:ESS-1**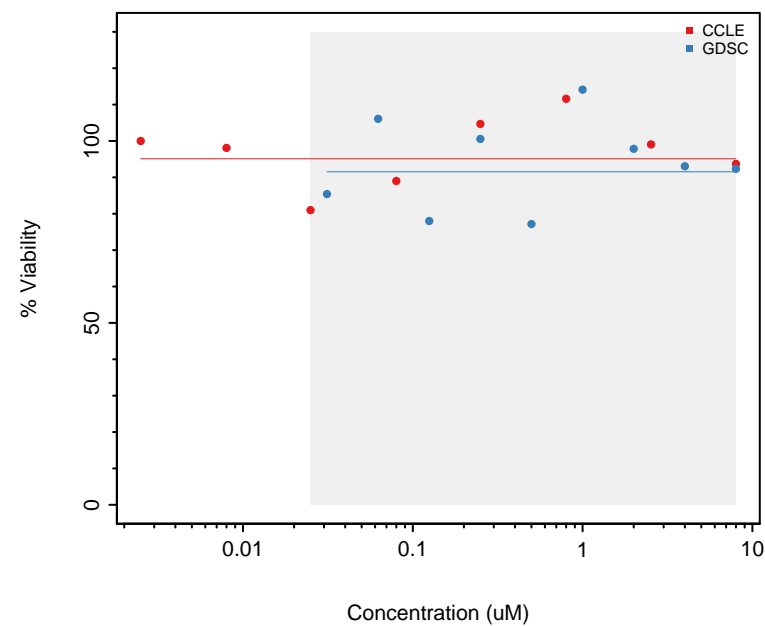**Nutlin-3:FADU**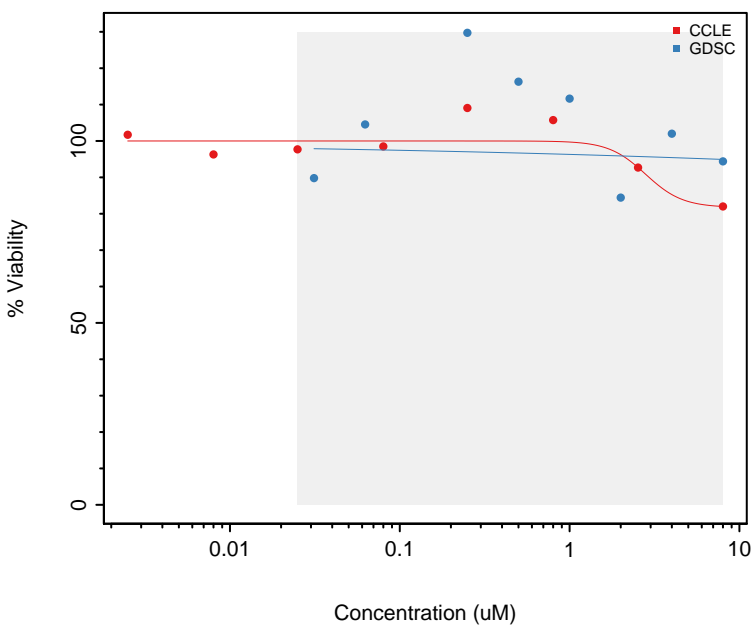**Nutlin-3:G-361**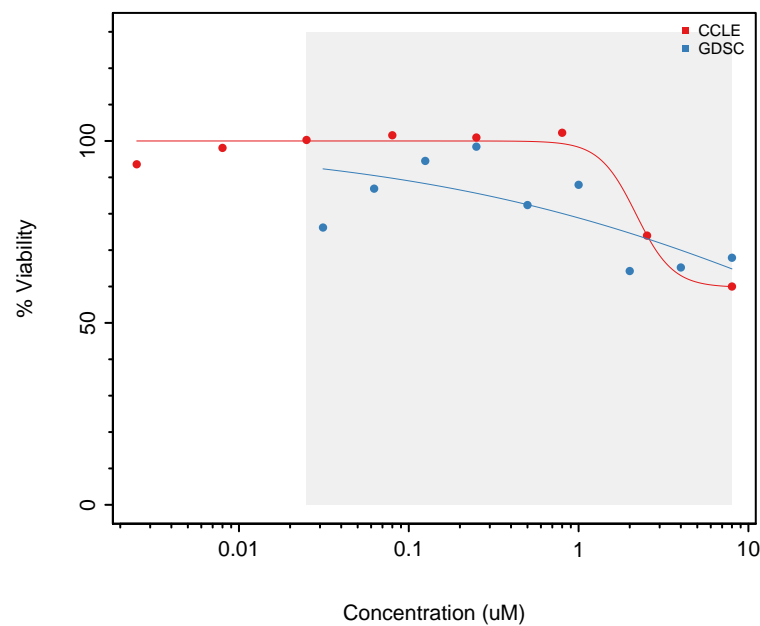**Nutlin-3:G-401**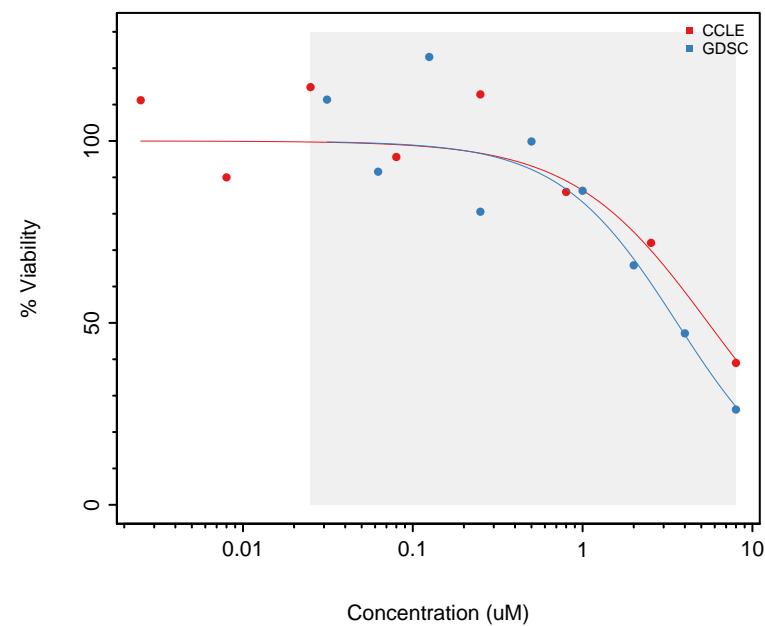**Nutlin-3:G-402**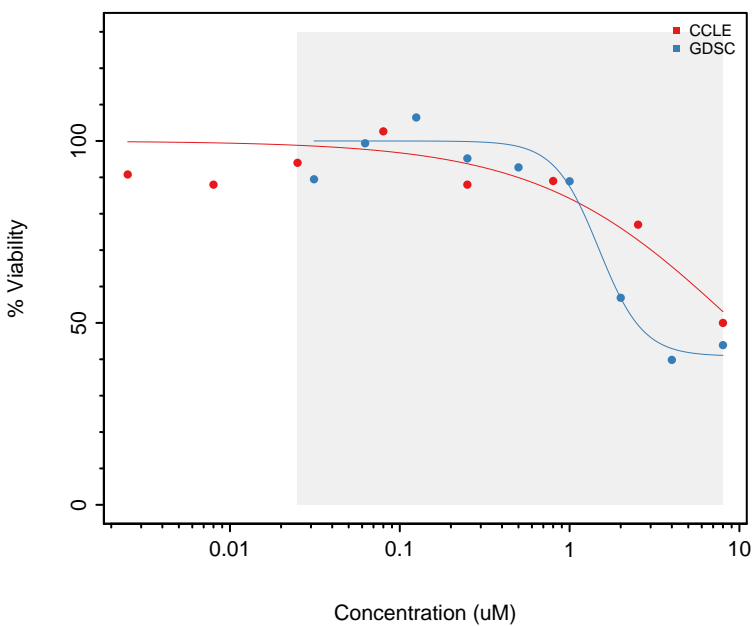**Nutlin-3:GB-1**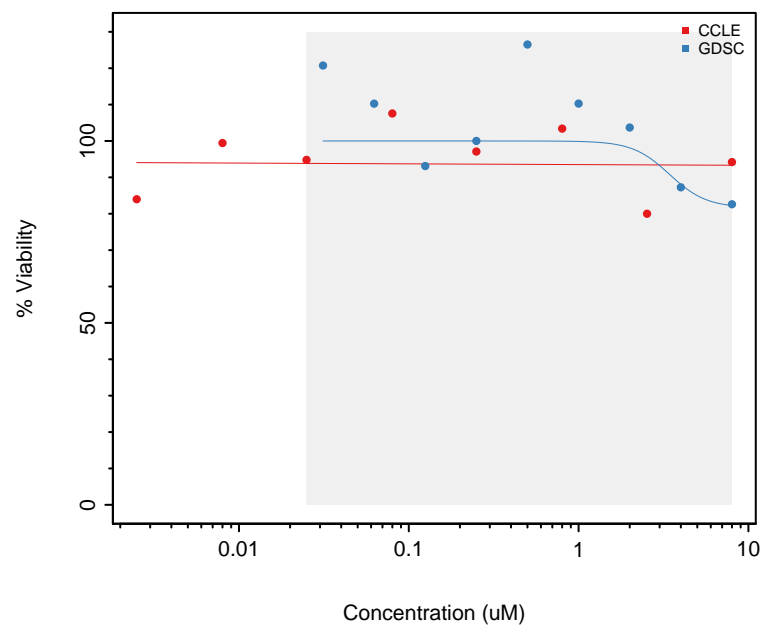**Nutlin-3:GCIY**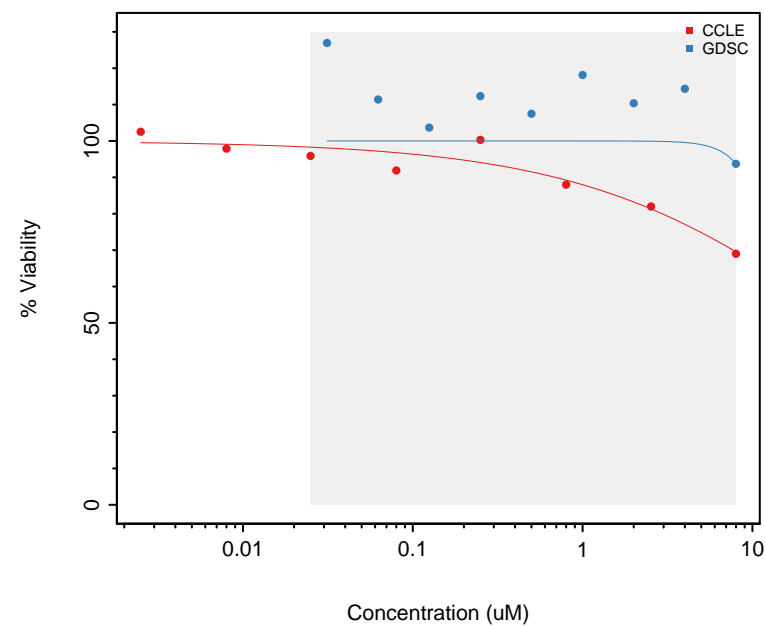

Nutlin-3:GCT

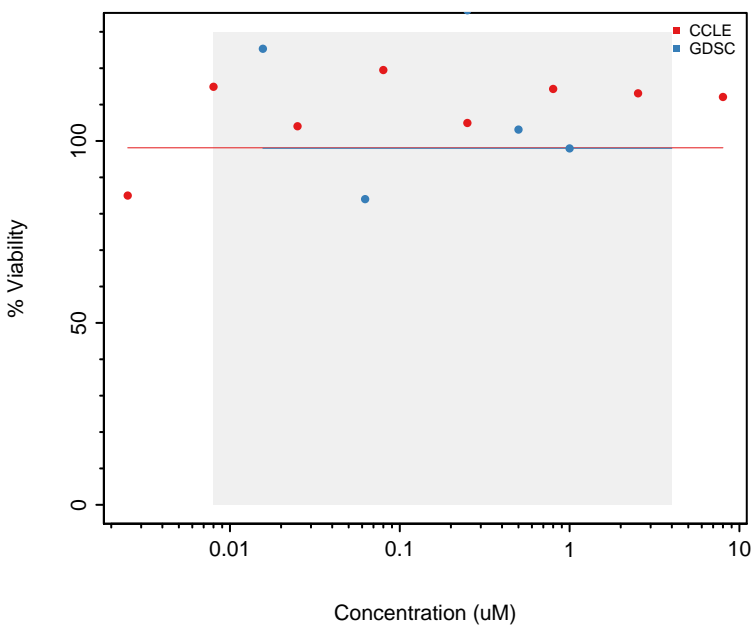

Nutlin-3:GI-1

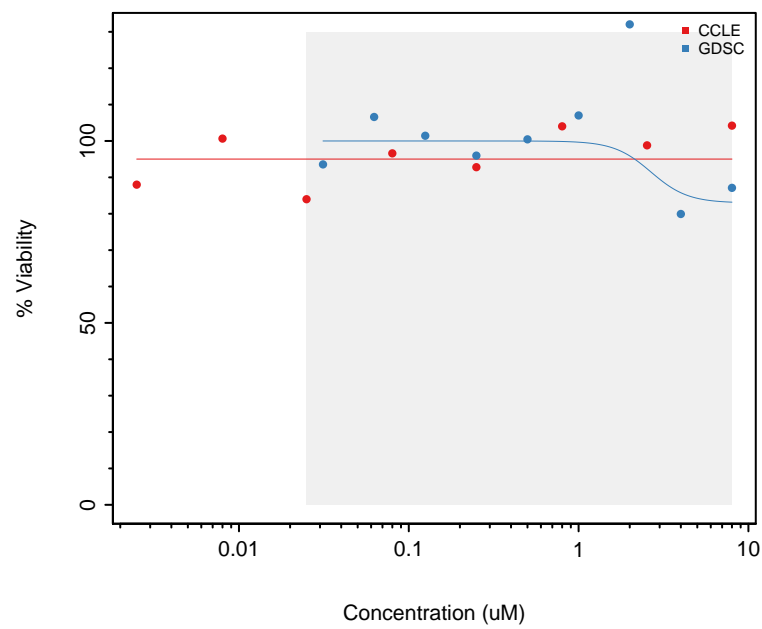

Nutlin-3:GMS-10

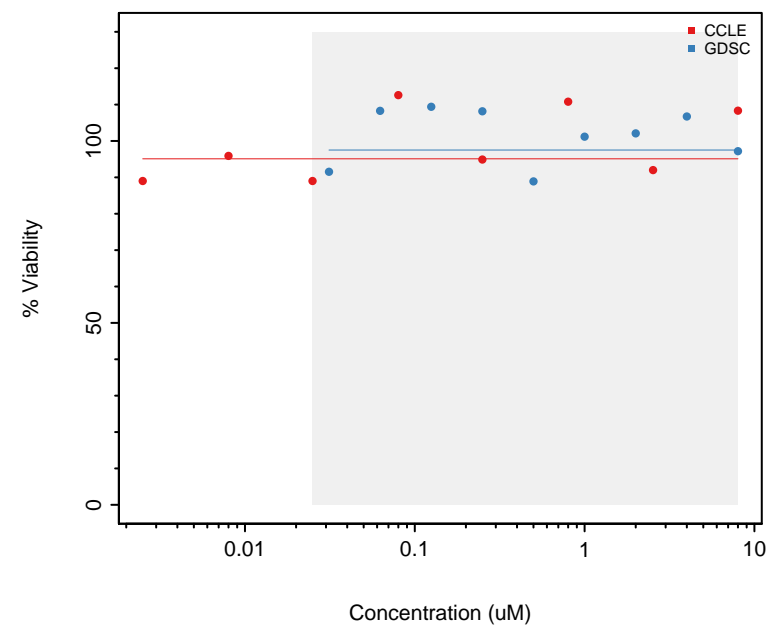

Nutlin-3:H4

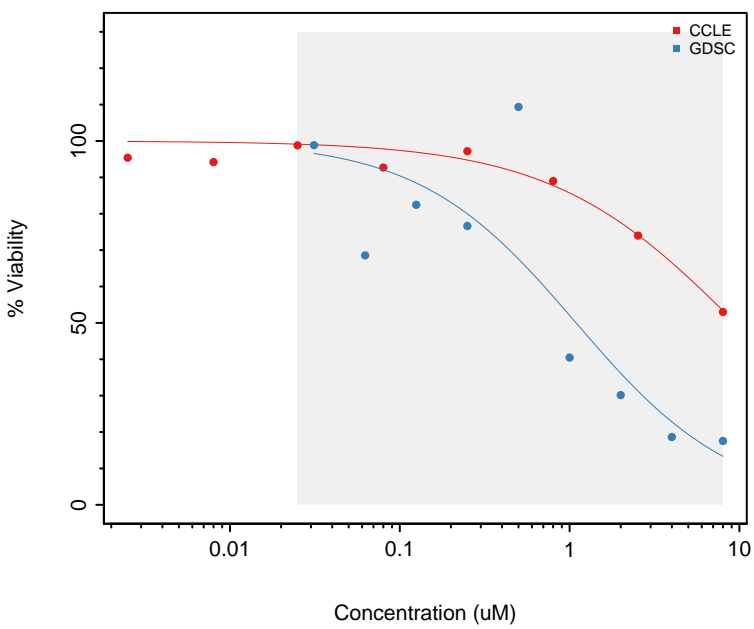

Nutlin-3:HCC1187

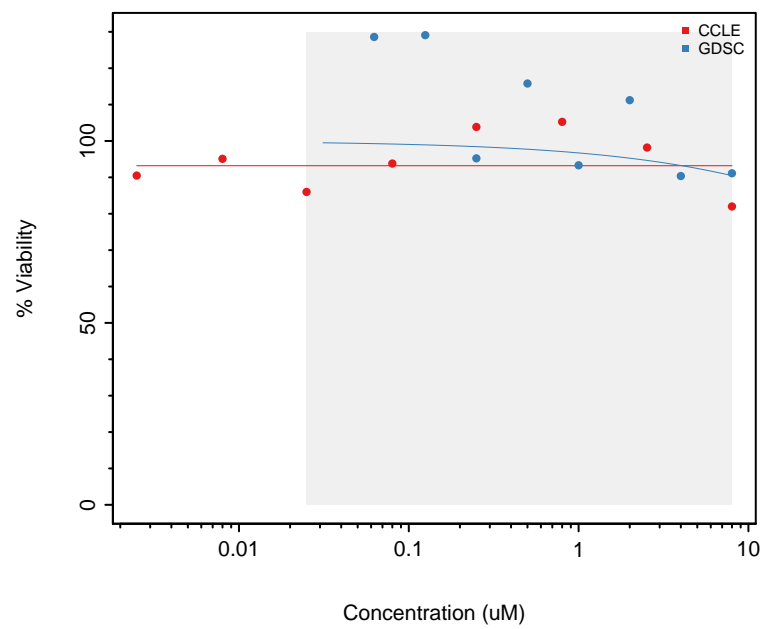

Nutlin-3:HCC1395

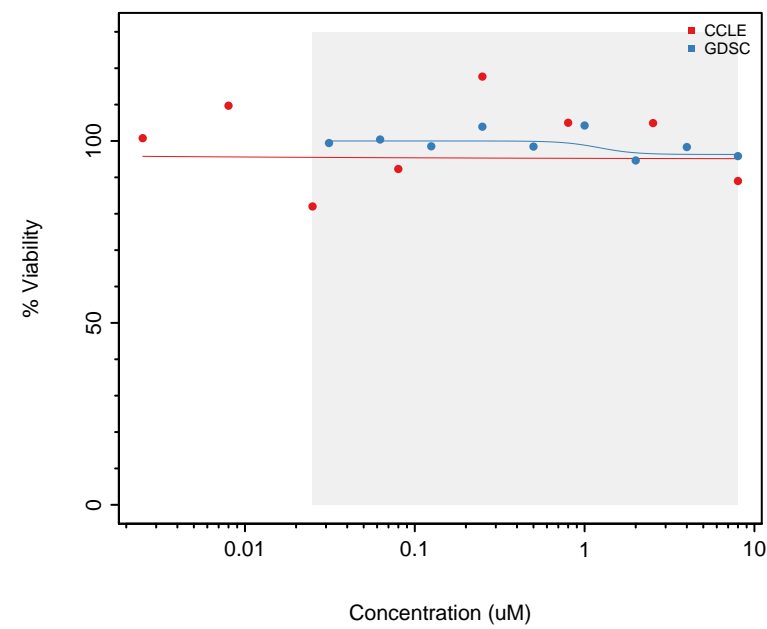

Nutlin-3:HCC1569

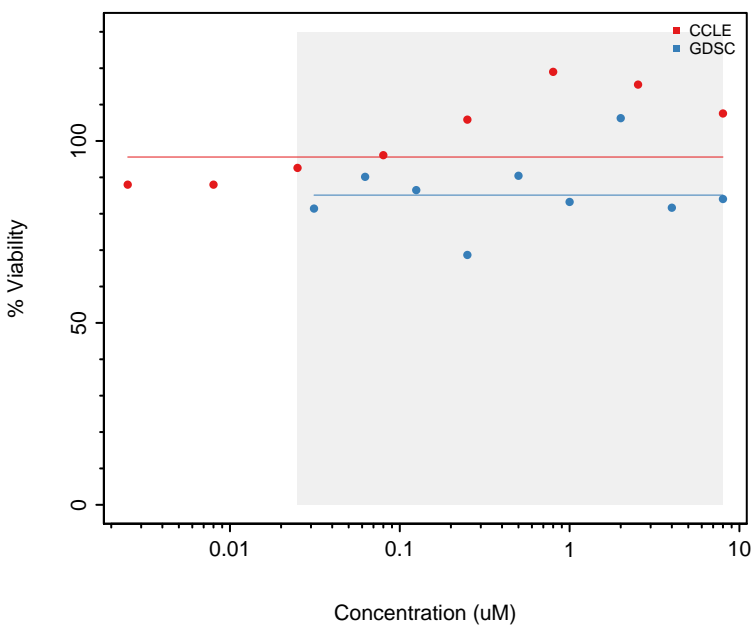

Nutlin-3:HCC1806

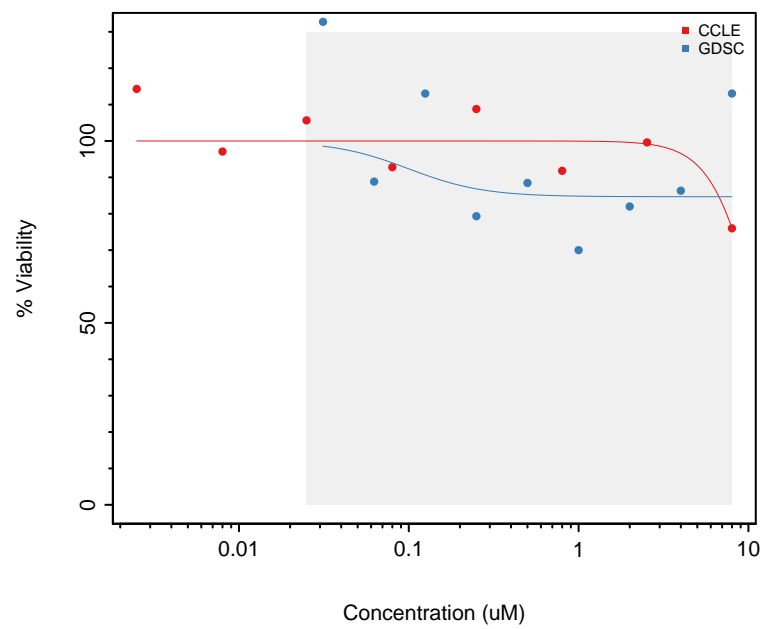

Nutlin-3:HCC1954

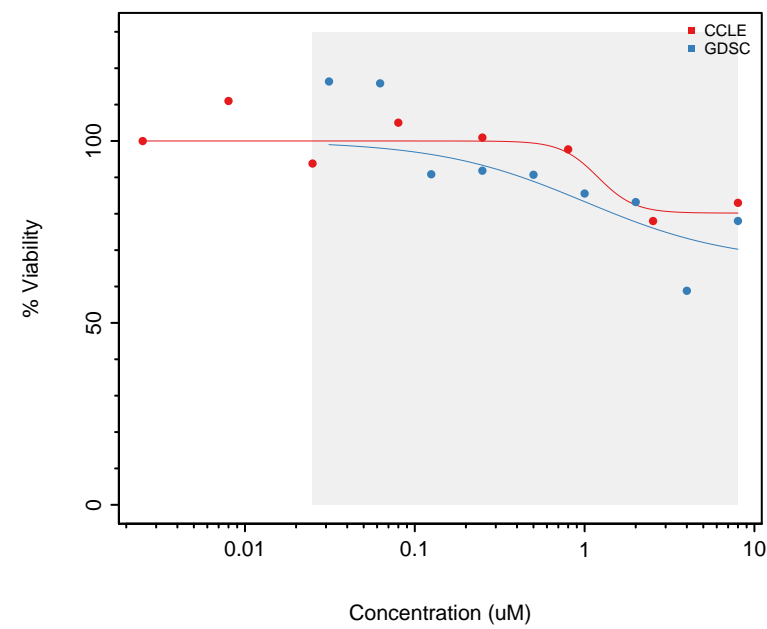

Nutlin-3:HCT-116

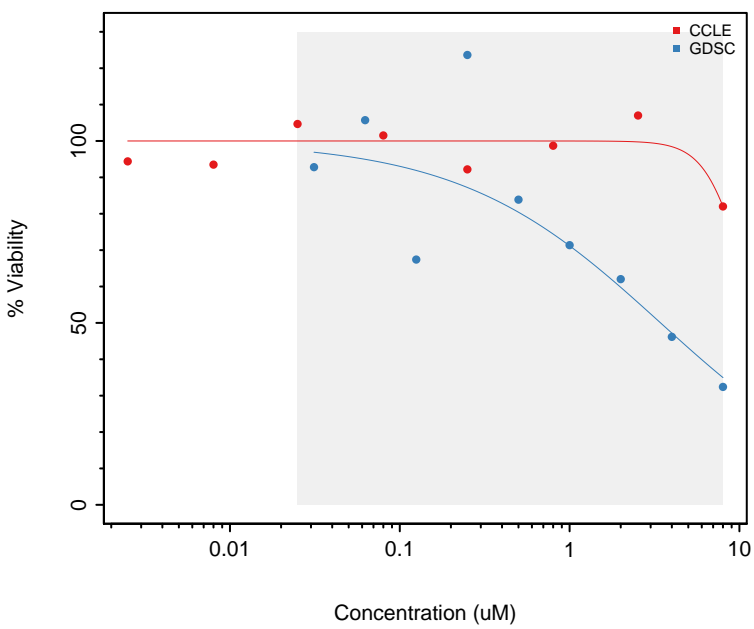

Nutlin-3:HCT-15

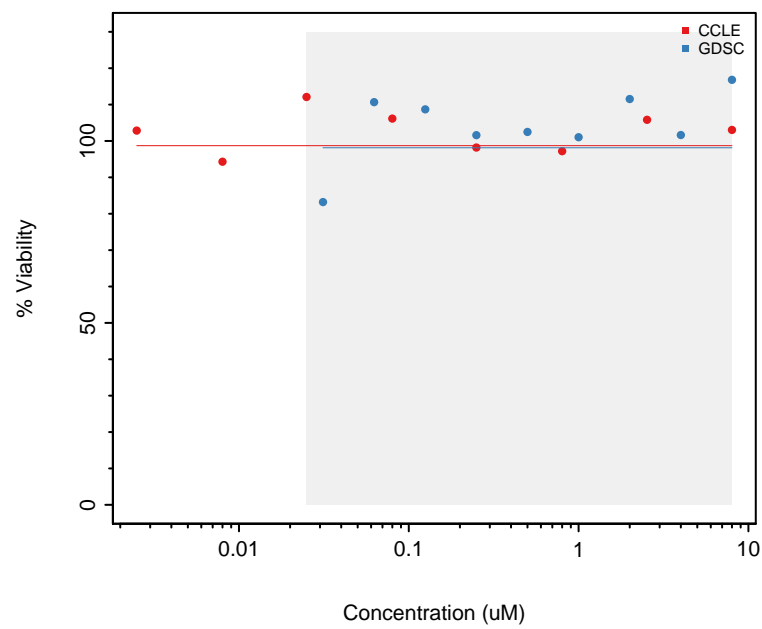

Nutlin-3:HD-MY-Z

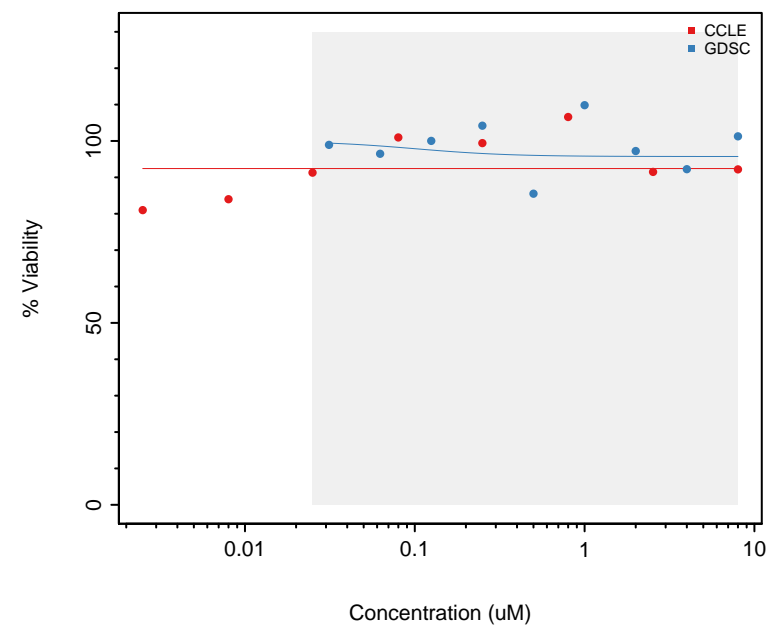













Nutlin-3:MG-63

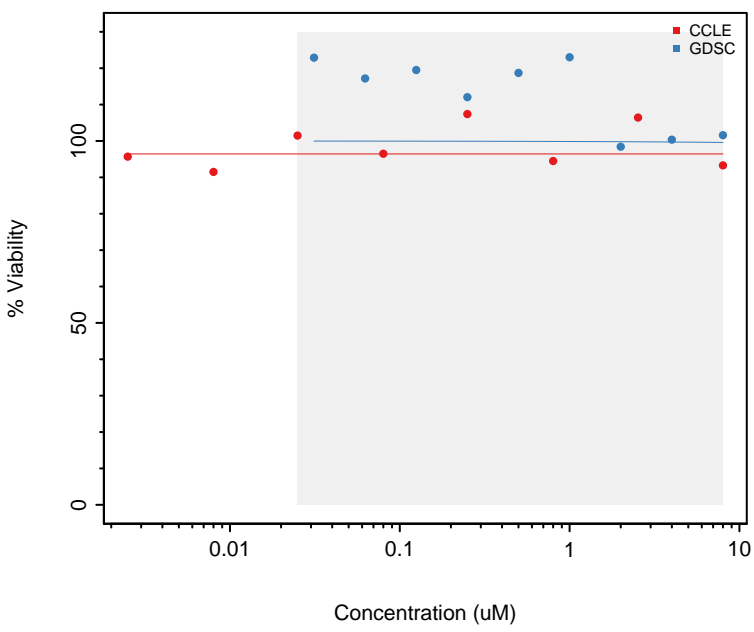

Nutlin-3:MHH-ES-1

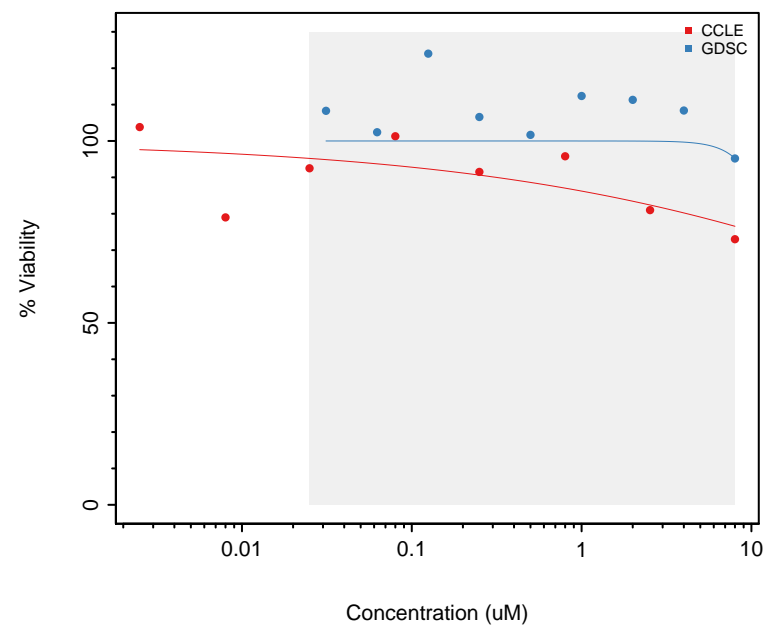

Nutlin-3:MIA-PaCa-2

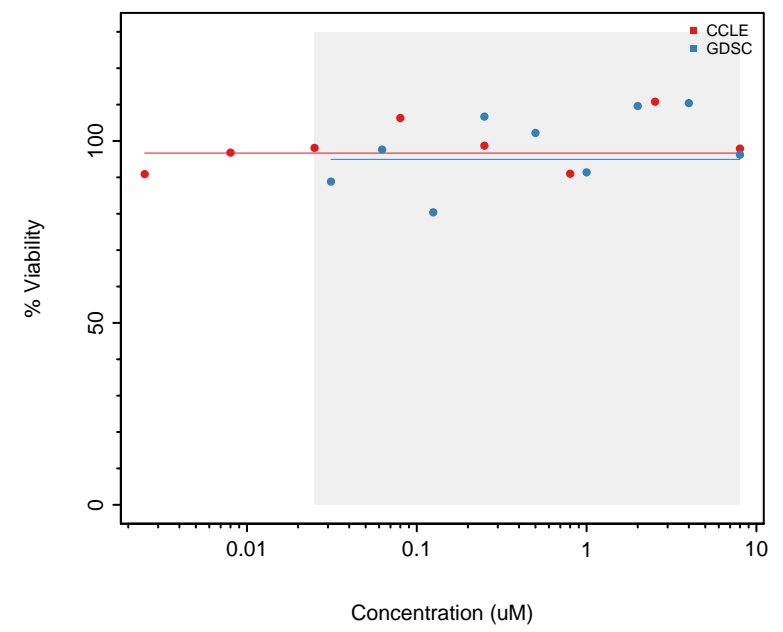

Nutlin-3:MKN45

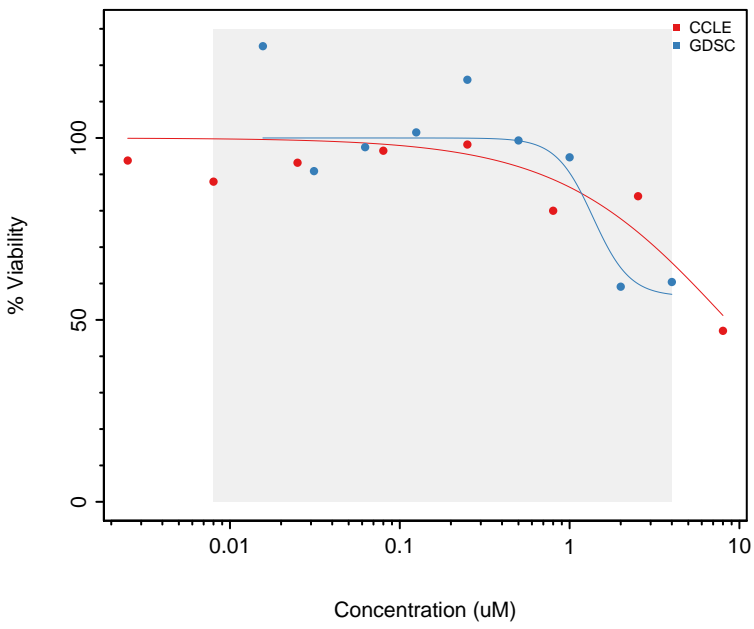

Nutlin-3:MKN7

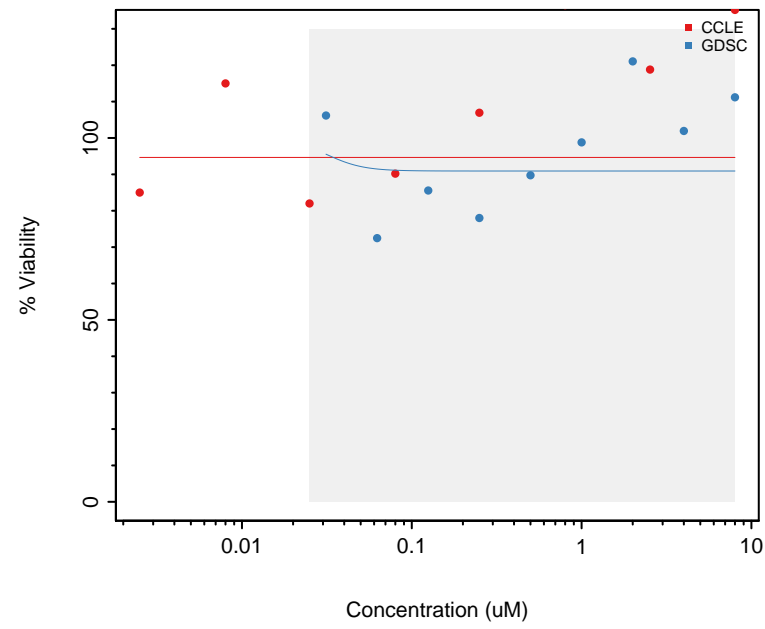

Nutlin-3:MOLT-16

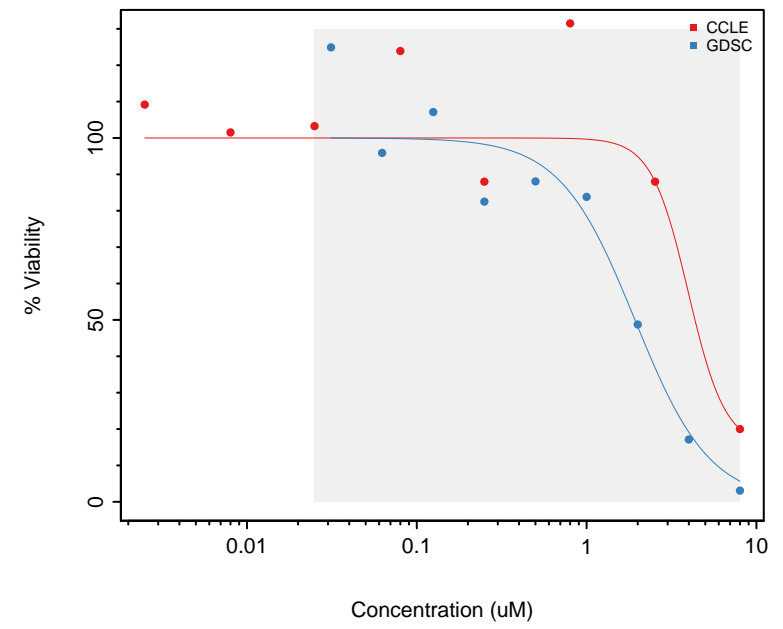

Nutlin-3:MPP-89

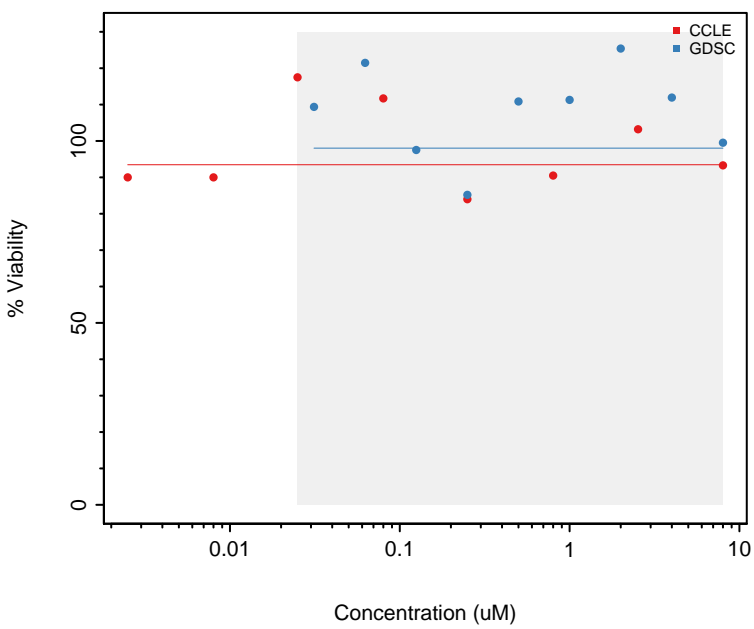

Nutlin-3:MSTO-211H

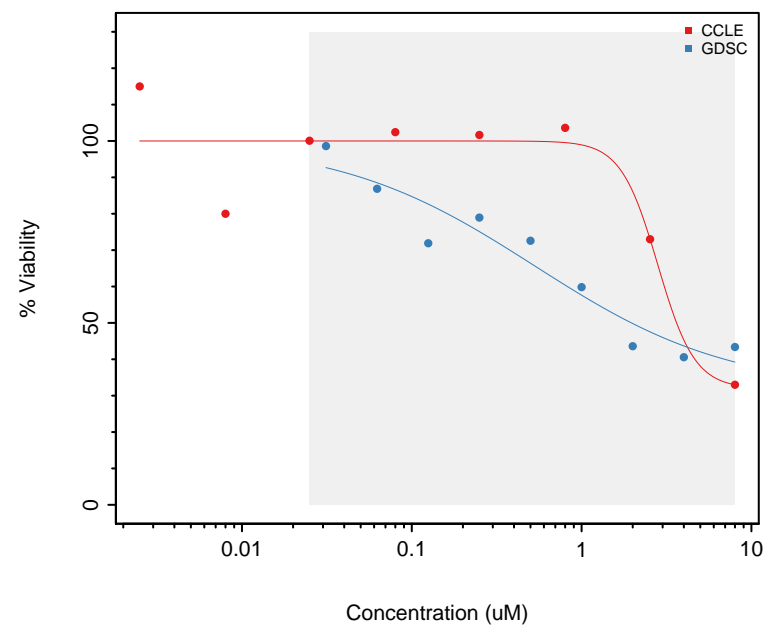

Nutlin-3:NCI-H1048

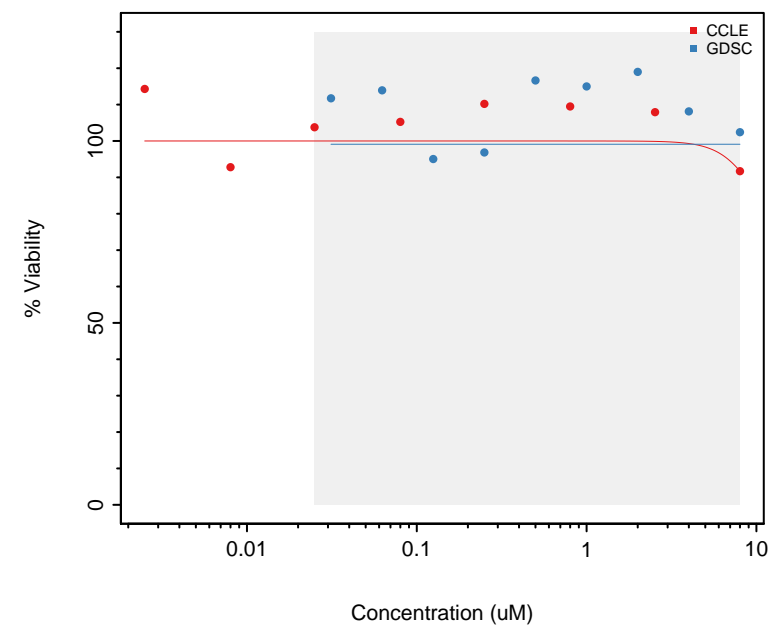

Nutlin-3:NCI-H1092

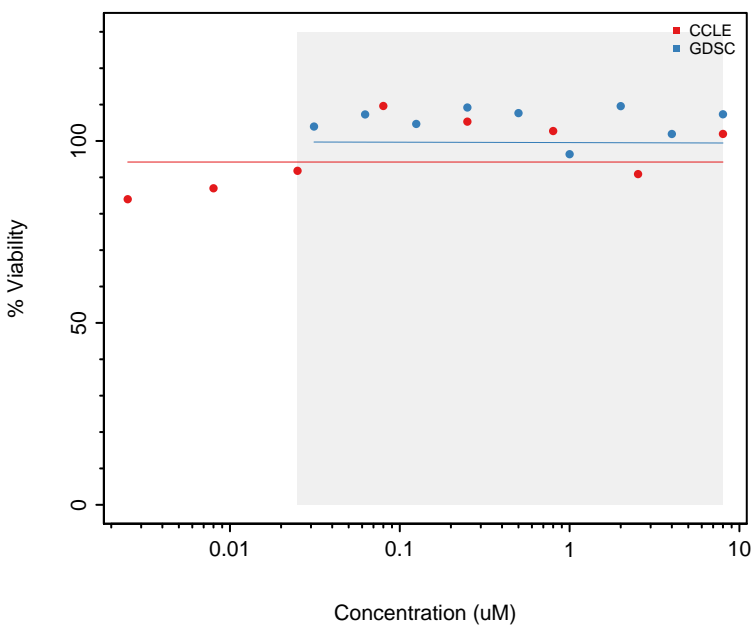

Nutlin-3:NCI-H1155

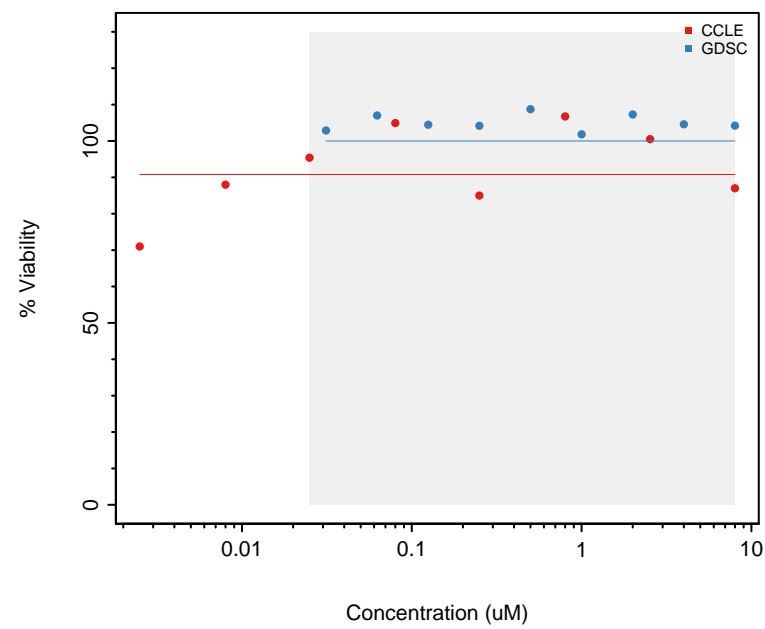

Nutlin-3:NCI-H1299

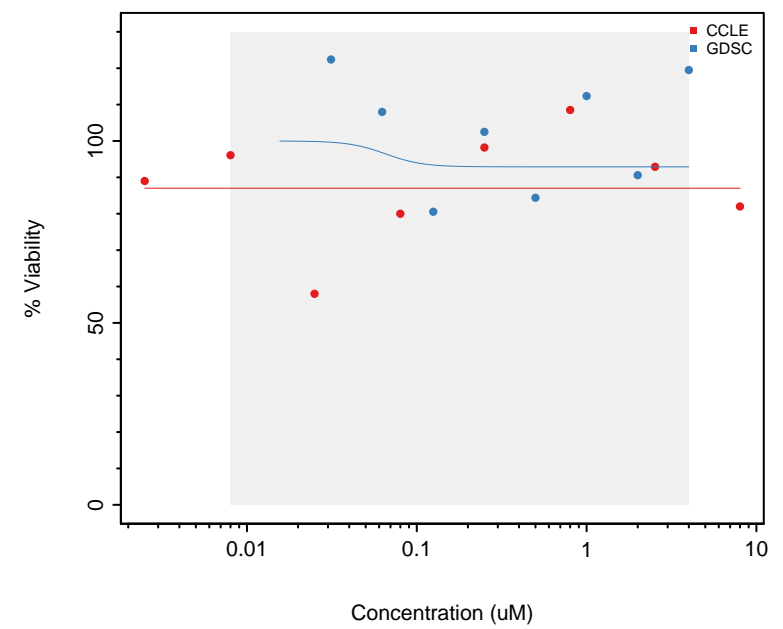

Nutlin-3:NCI-H1563

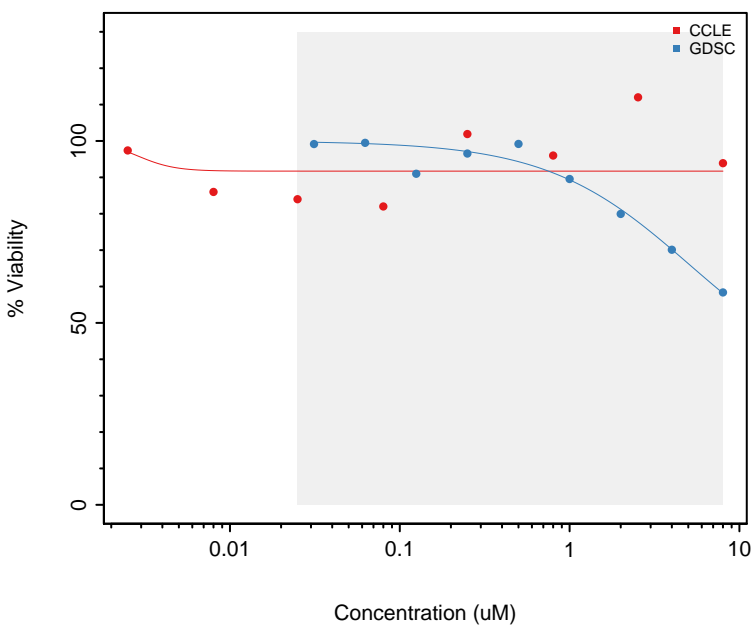

Nutlin-3:NCI-H1573

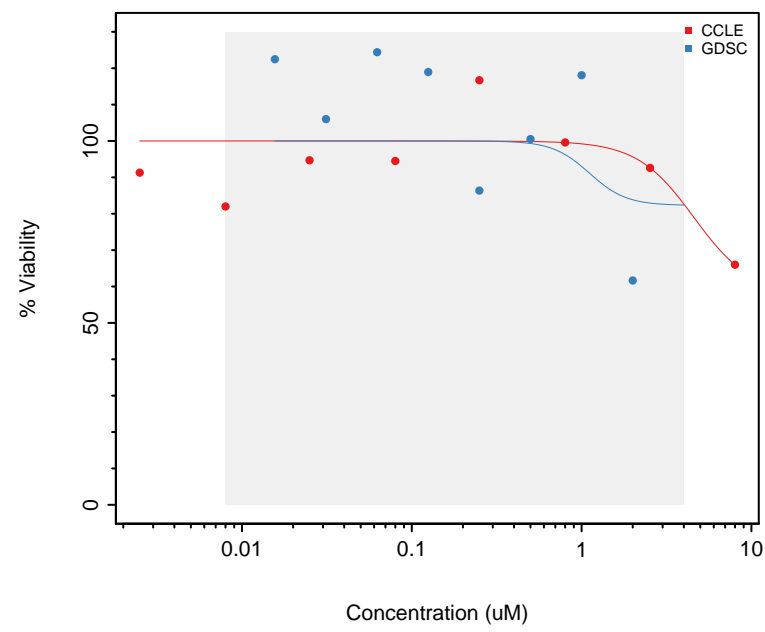

Nutlin-3:NCI-H1650

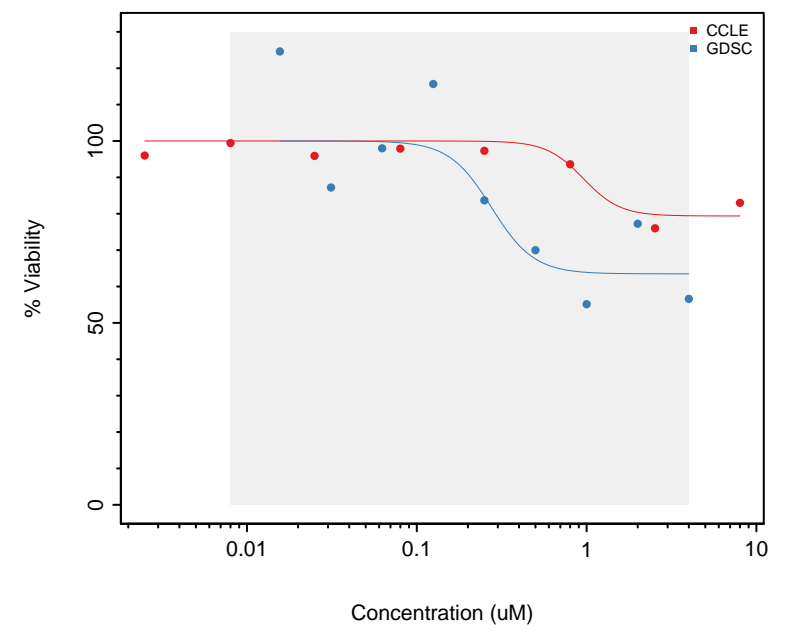

Nutlin-3:NCI-H1651

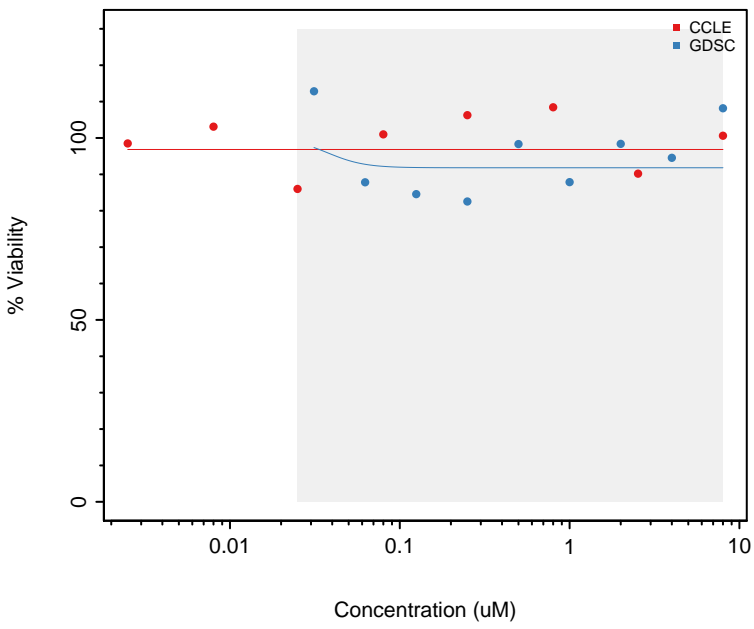

Nutlin-3:NCI-H1666

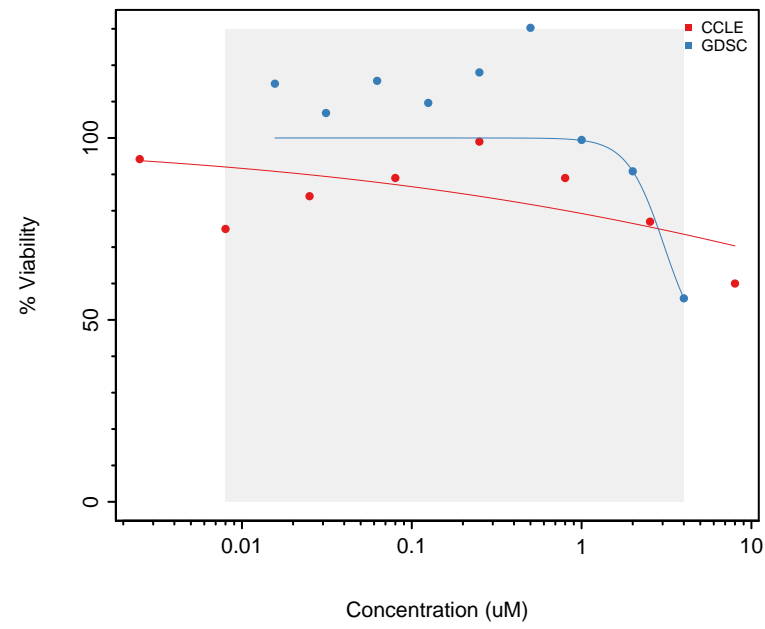

Nutlin-3:NCI-H1694

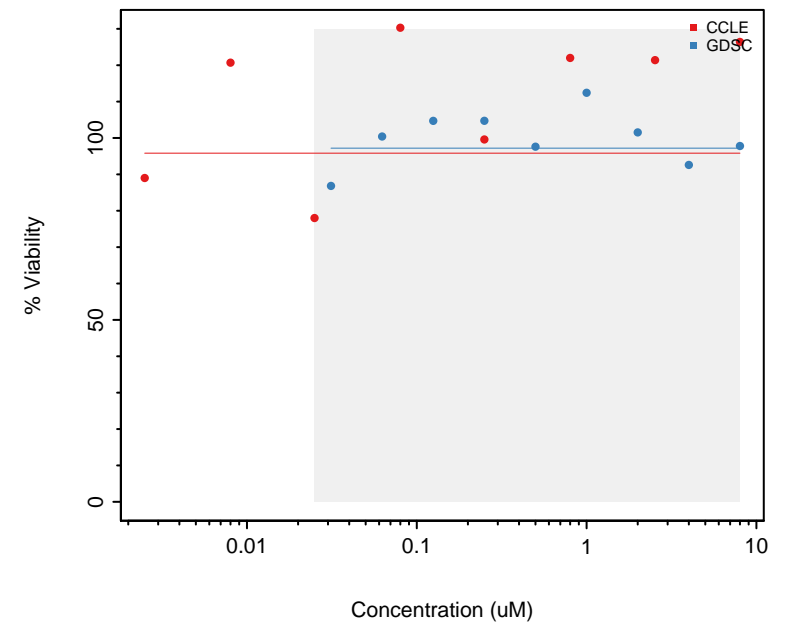

Nutlin-3:NCI-H1703

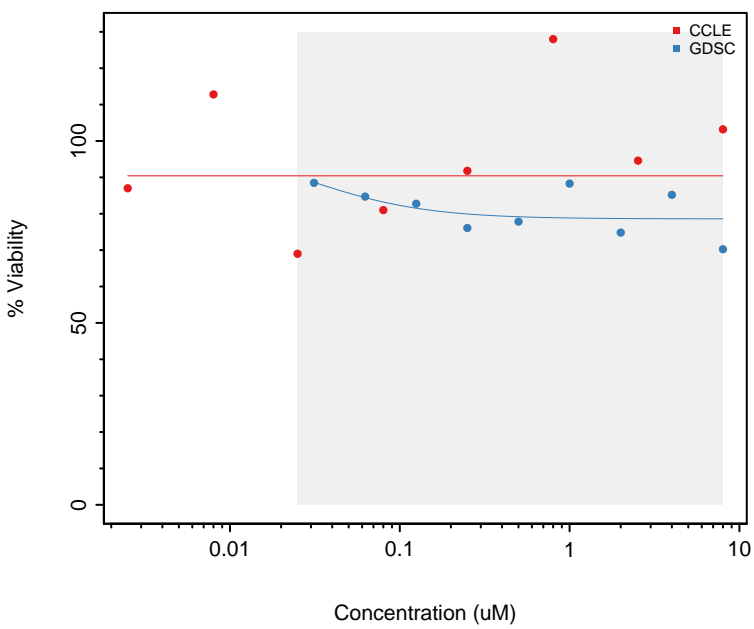

Nutlin-3:NCI-H1792

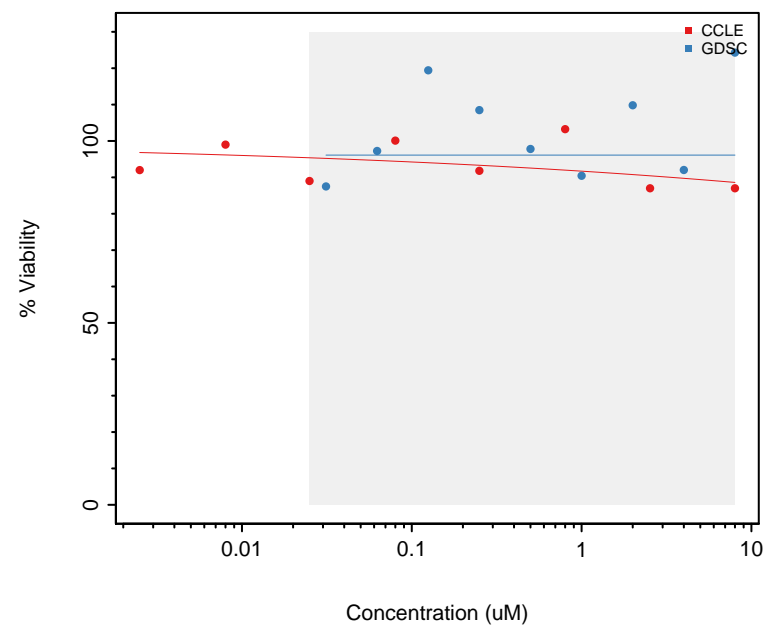

Nutlin-3:NCI-H1975

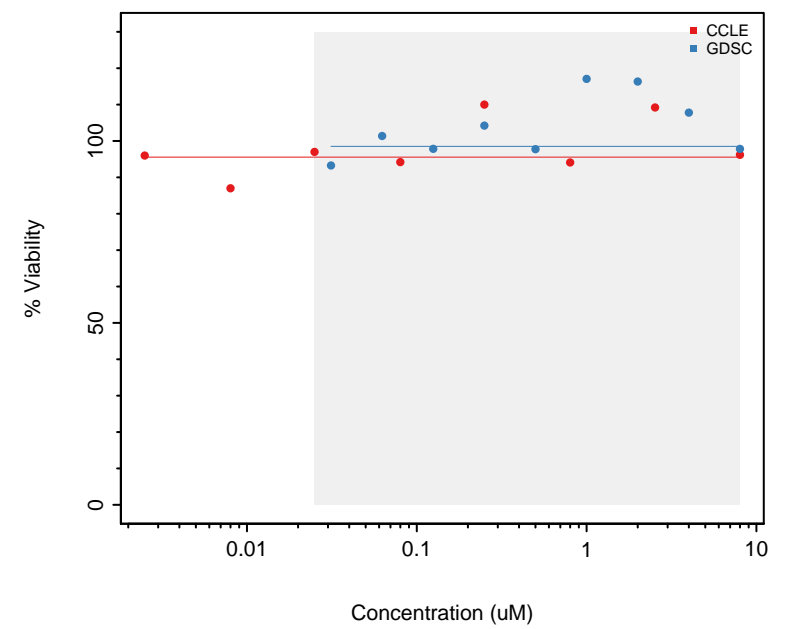

Nutlin-3:NCI-H2009

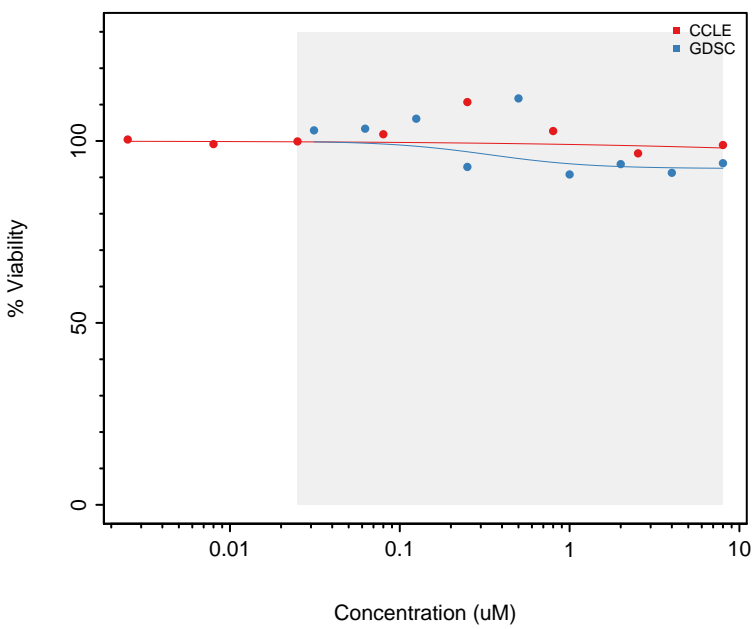

Nutlin-3:NCI-H2030

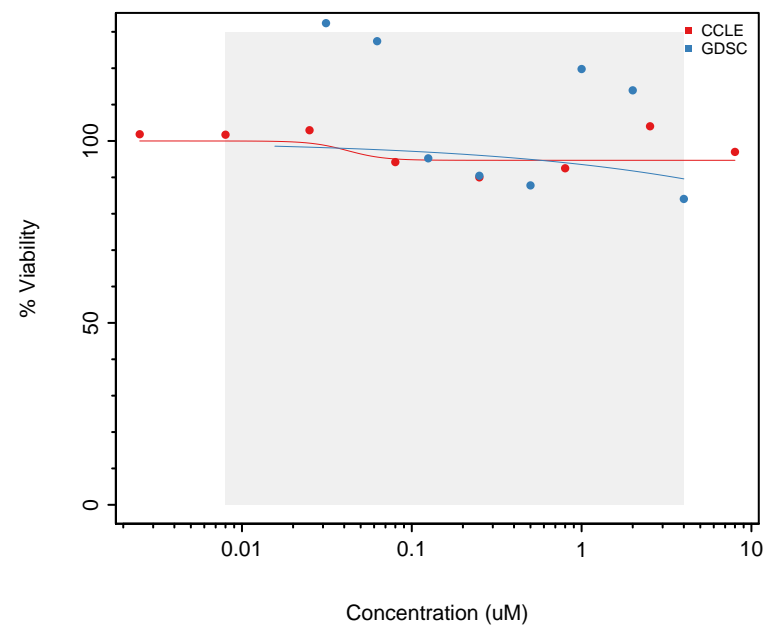

Nutlin-3:NCI-H2052

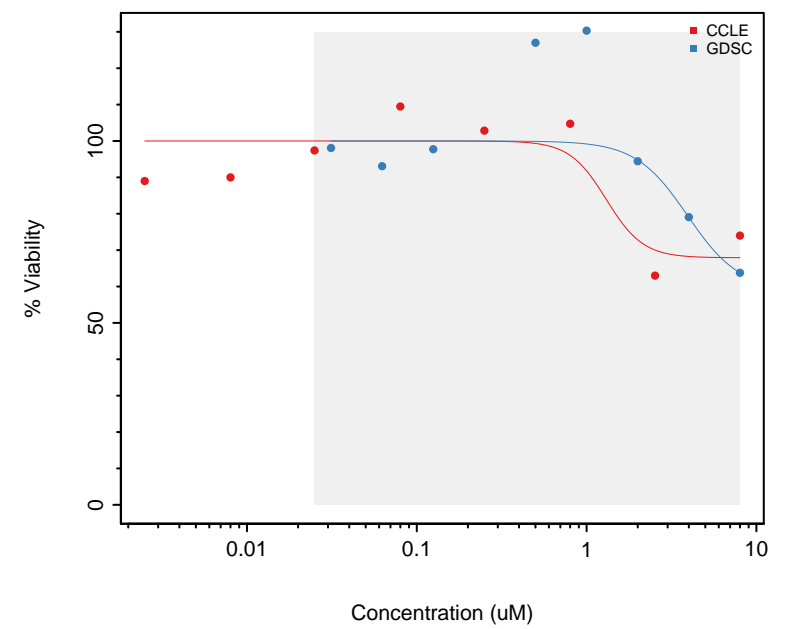





Nutlin-3:OVCAR-8

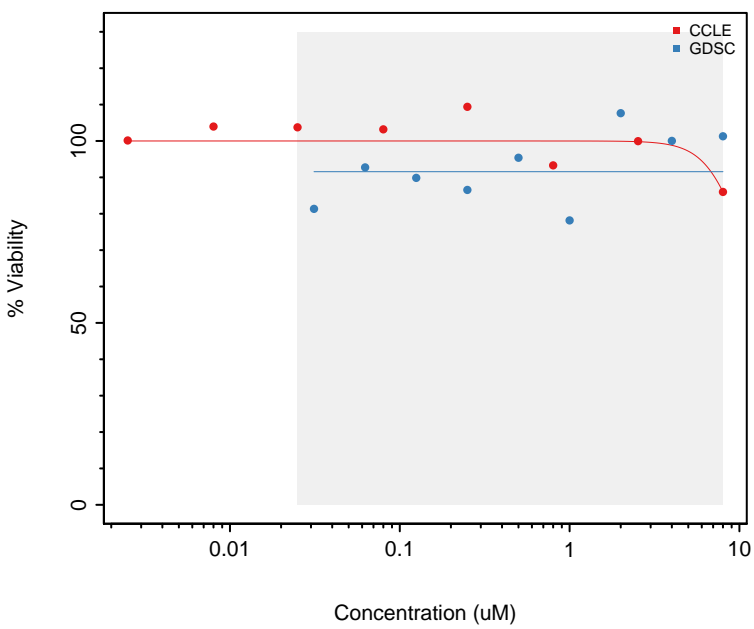

Nutlin-3:P12-ICHIKAWA

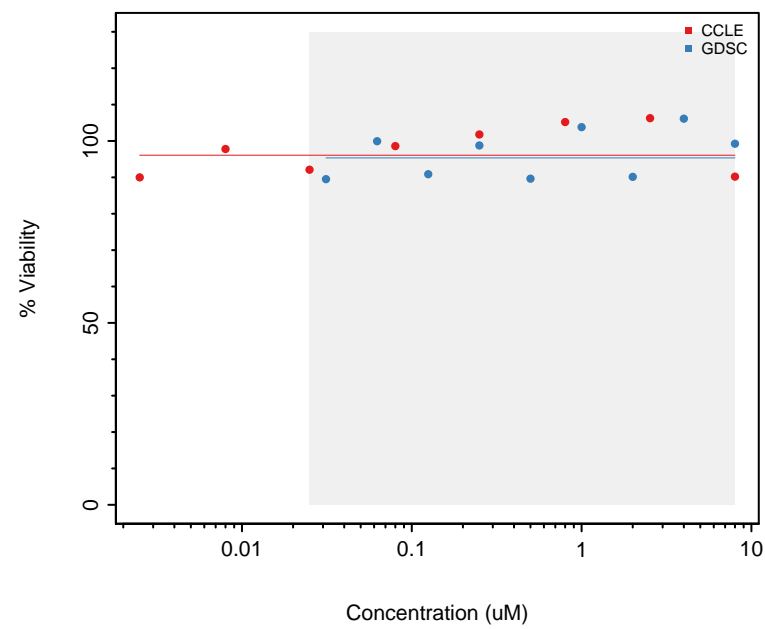

Nutlin-3:P31-FUJ

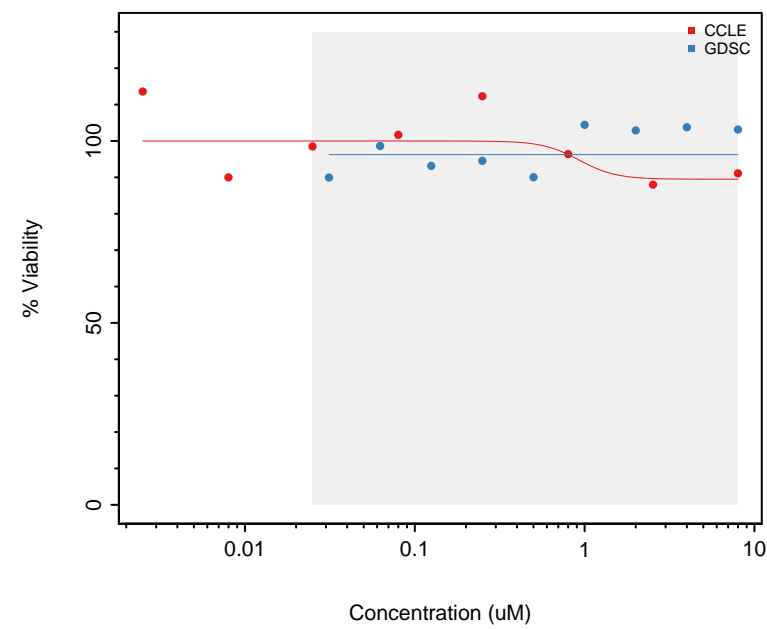

Nutlin-3:Panc 03.27

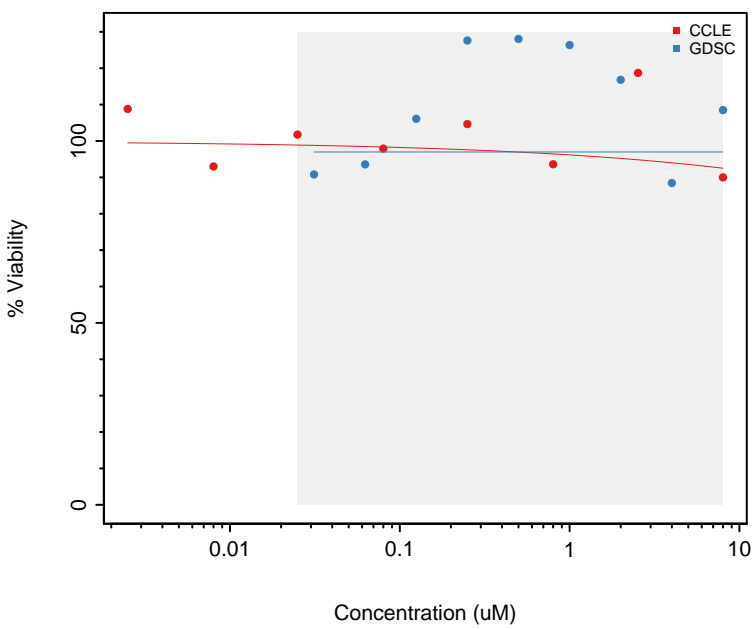

Nutlin-3:PC-14

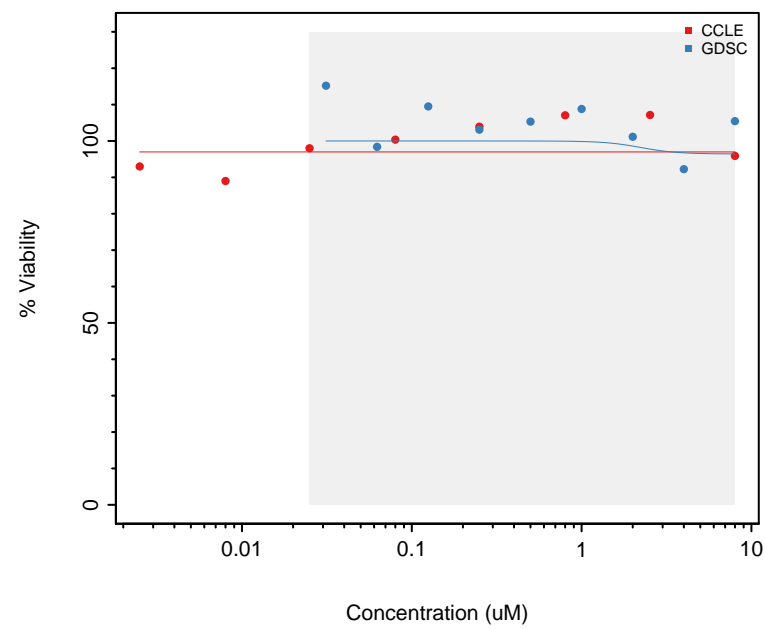

Nutlin-3:PC-3

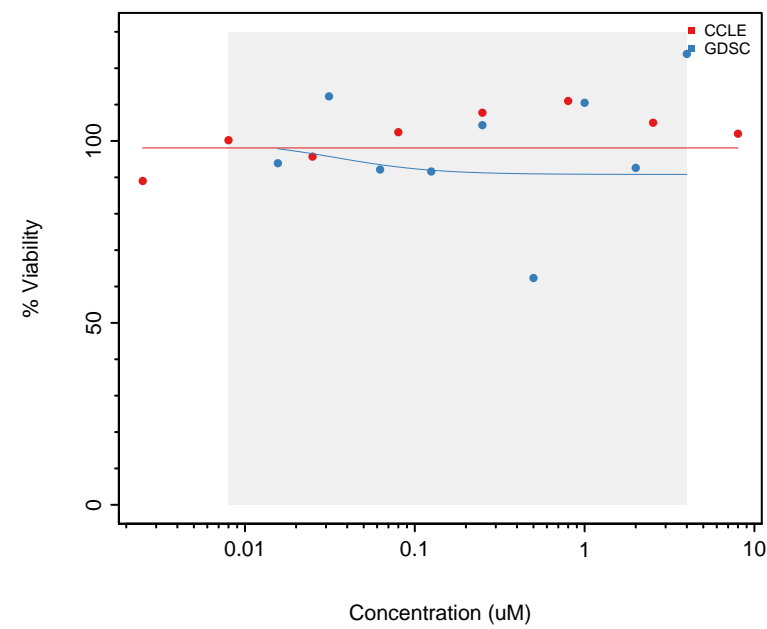

Nutlin-3:PSN1

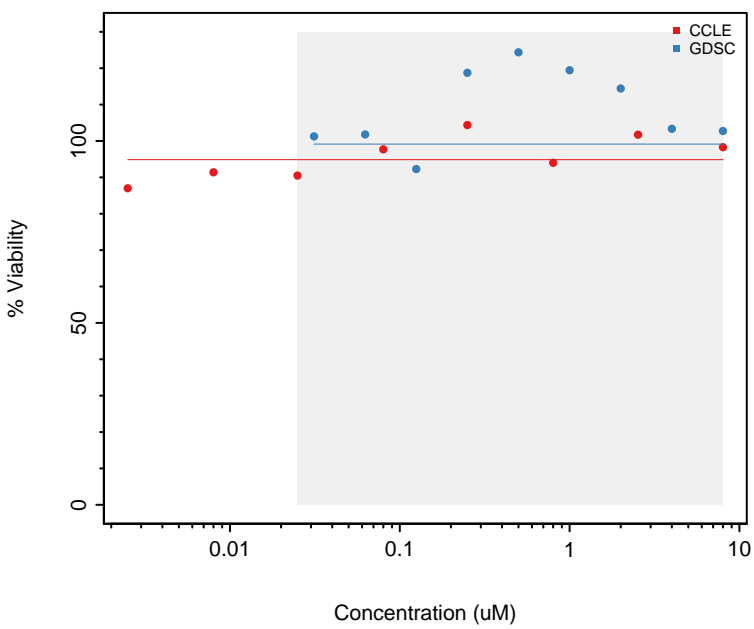

Nutlin-3:REH

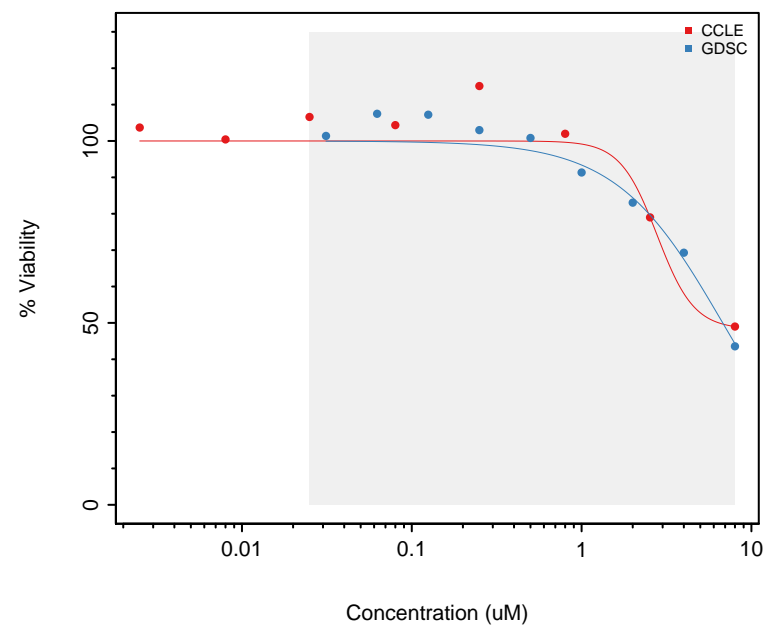

Nutlin-3:RERF-LC-MS

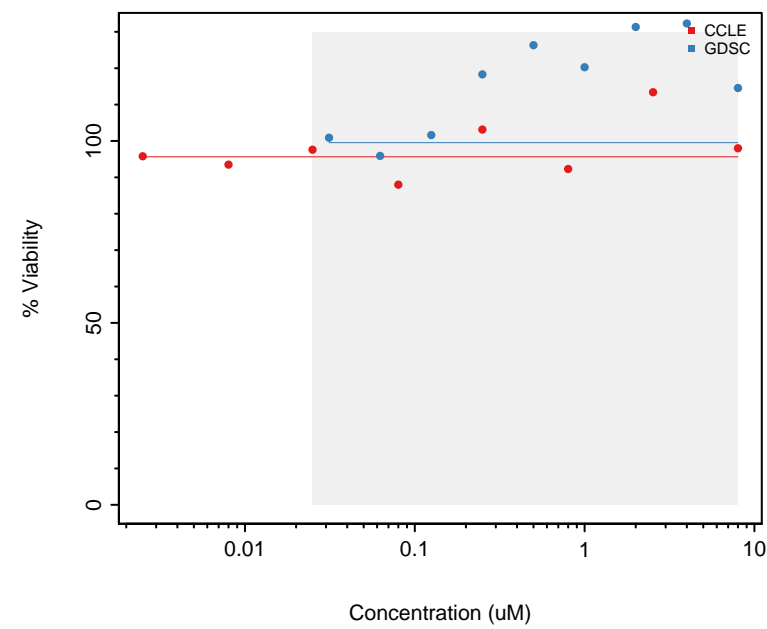

Nutlin-3:RKO

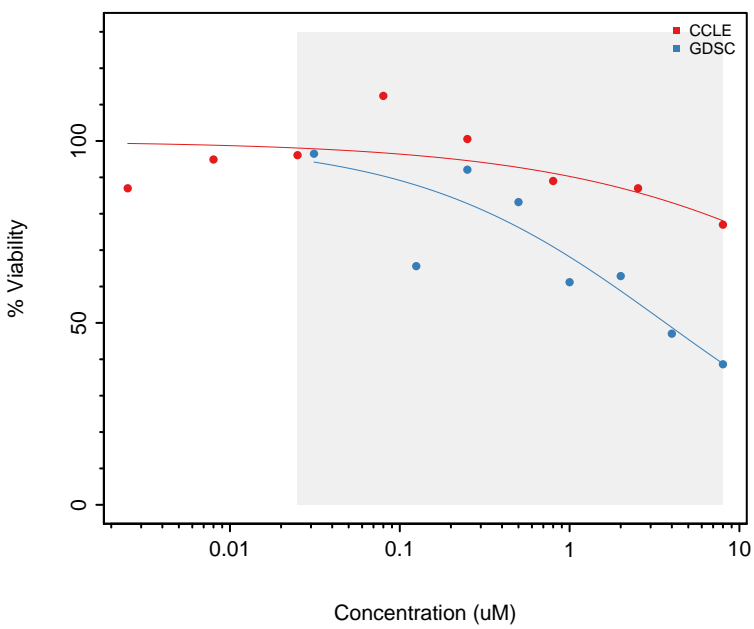

Nutlin-3:RL95-2

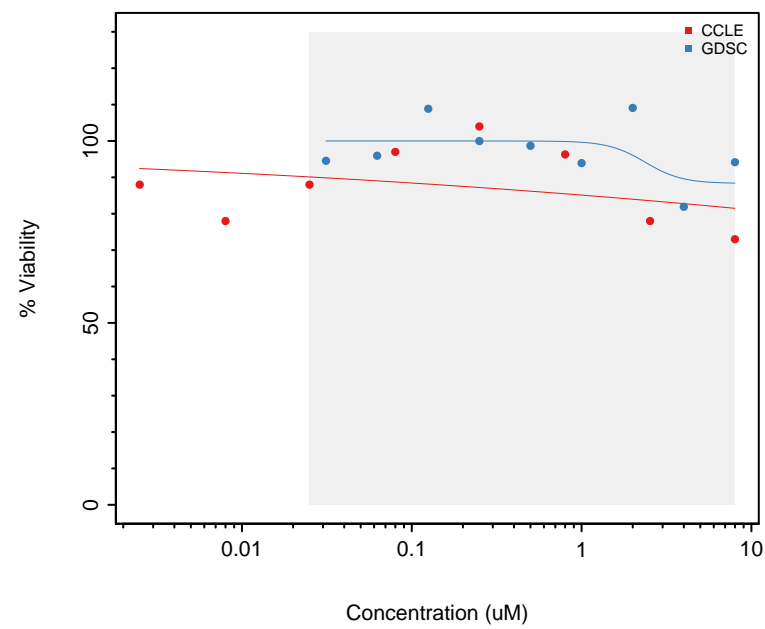

Nutlin-3:RPMI-7951

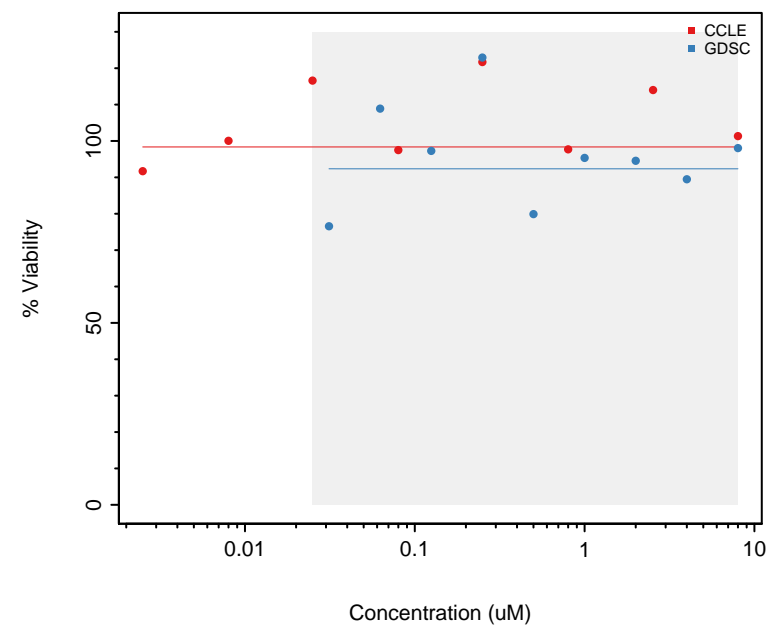







Nutlin-3:SK-N-FI

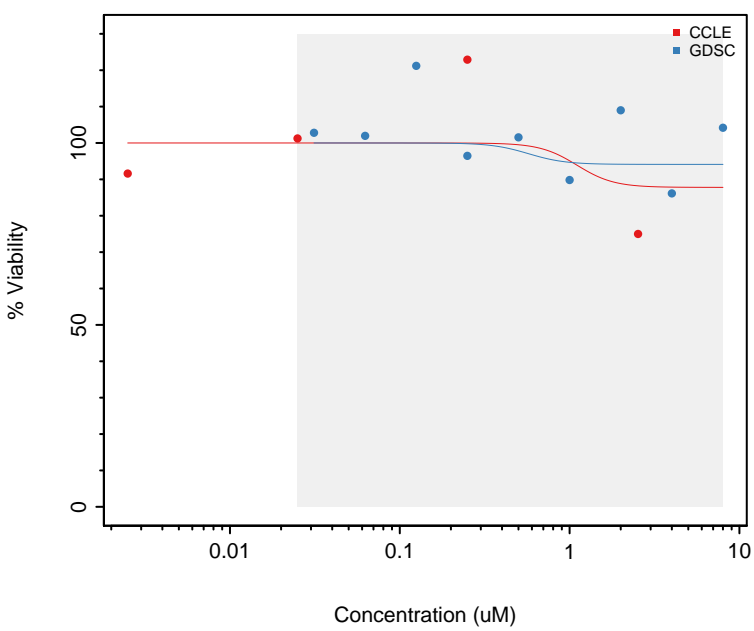

Nutlin-3:SK-OV-3

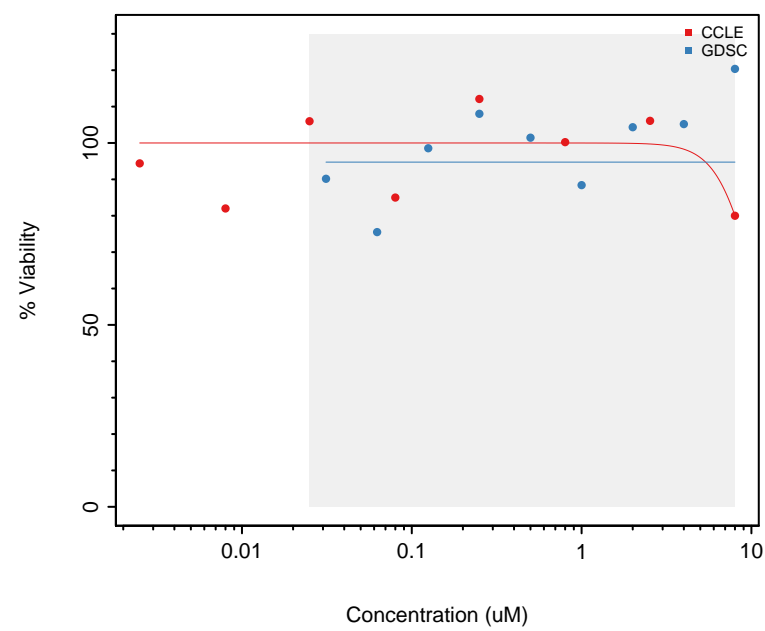

Nutlin-3:SNG-M

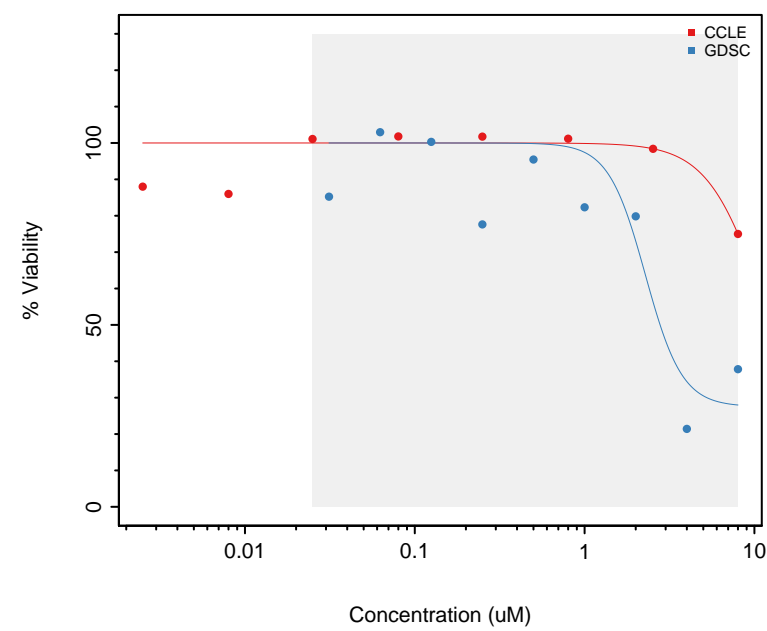

Nutlin-3:NCI-SNU-1

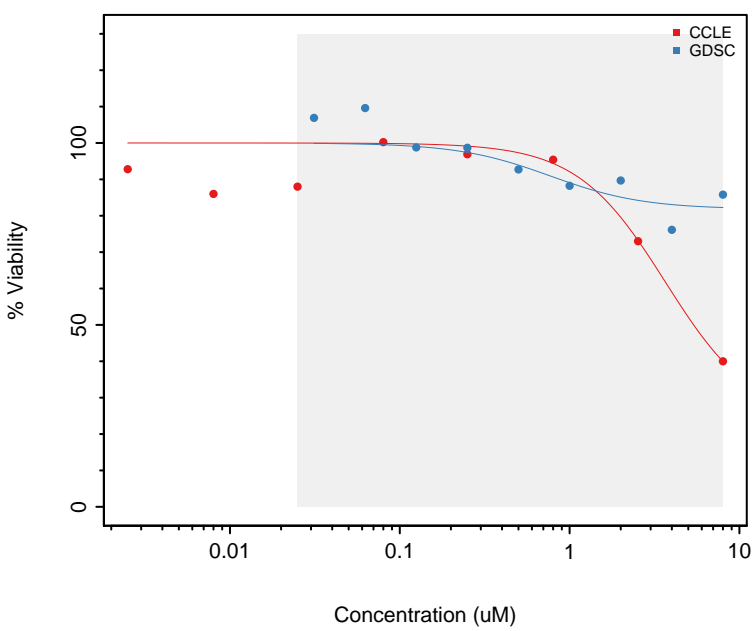

Nutlin-3:NCI-SNU-16

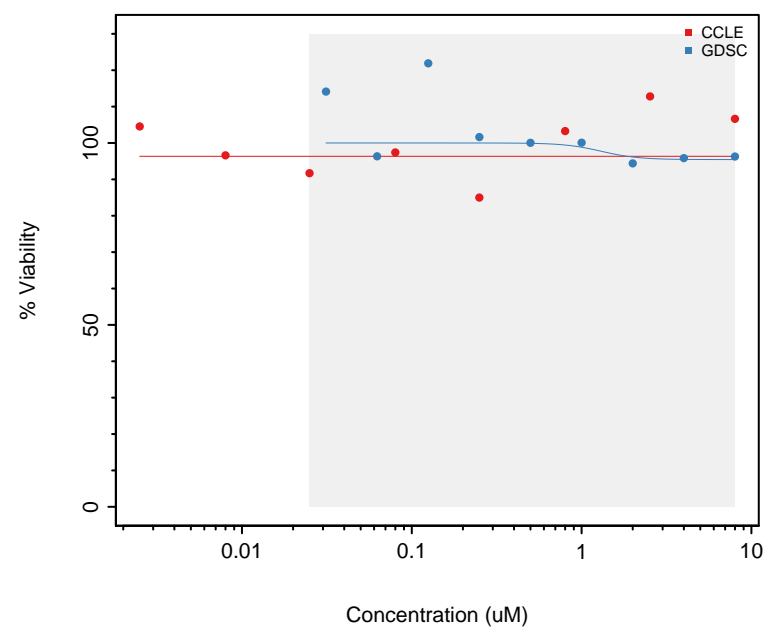

Nutlin-3:SNU-387

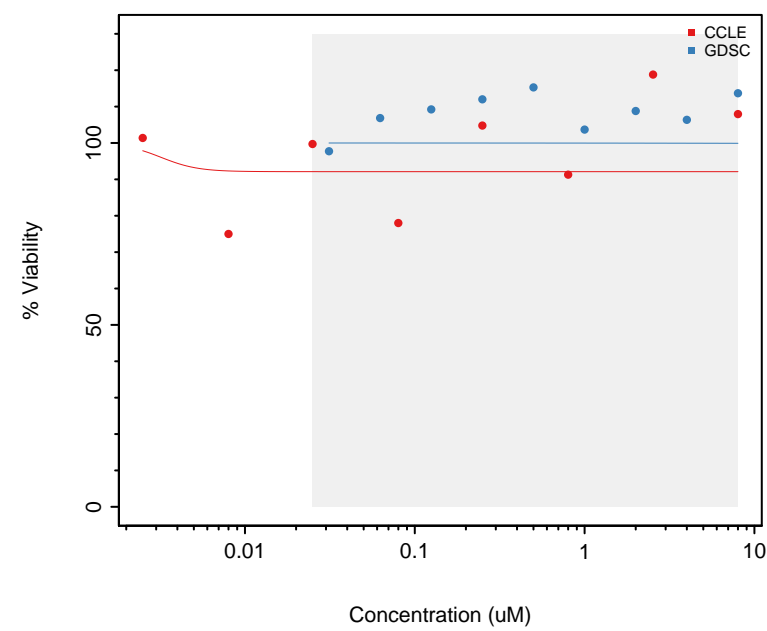

Nutlin-3:SNU-423

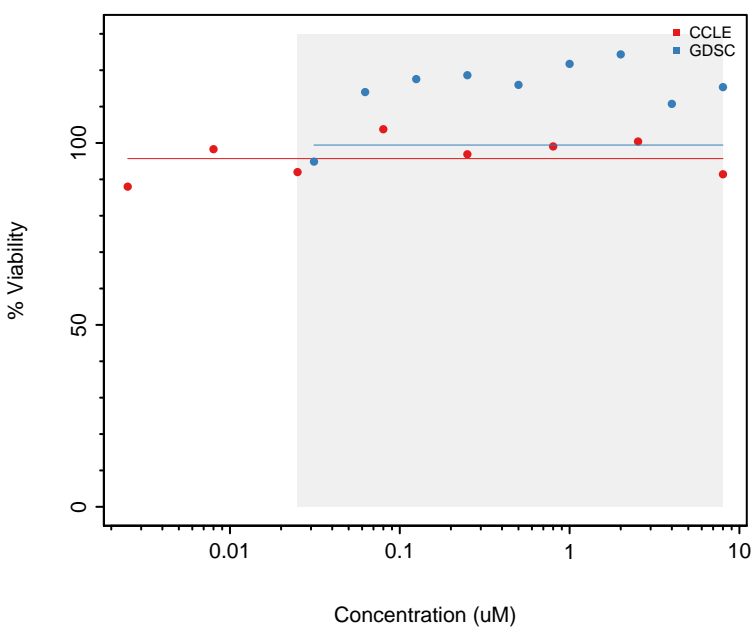

Nutlin-3:SNU-449

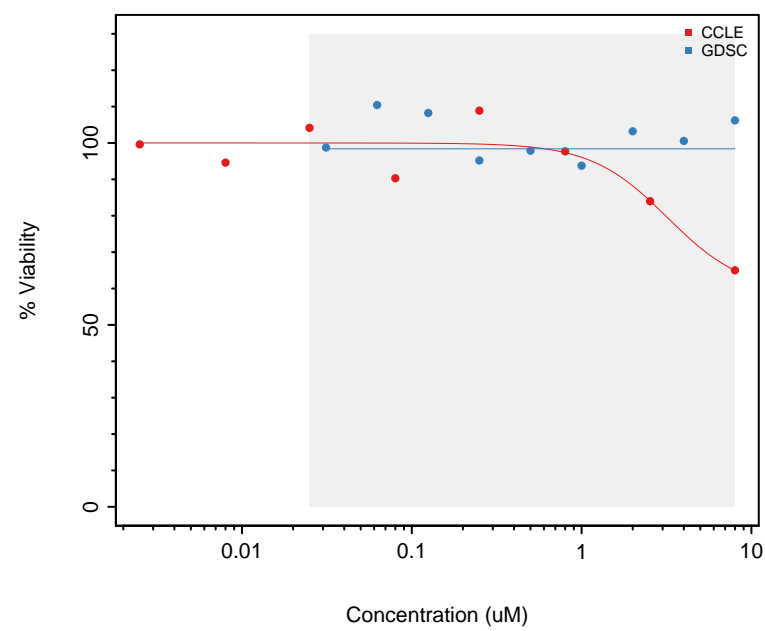

Nutlin-3:SNU-C2B

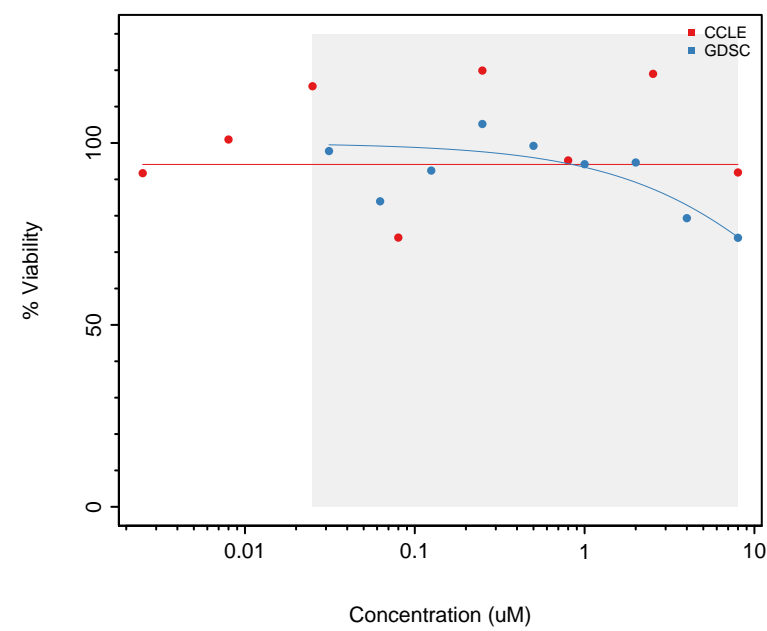

Nutlin-3:SUP-T1

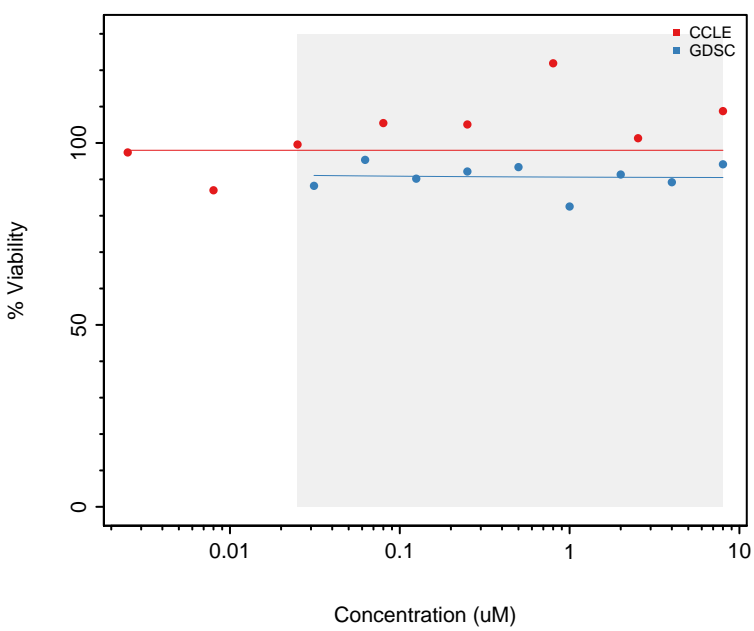

Nutlin-3:SW1417

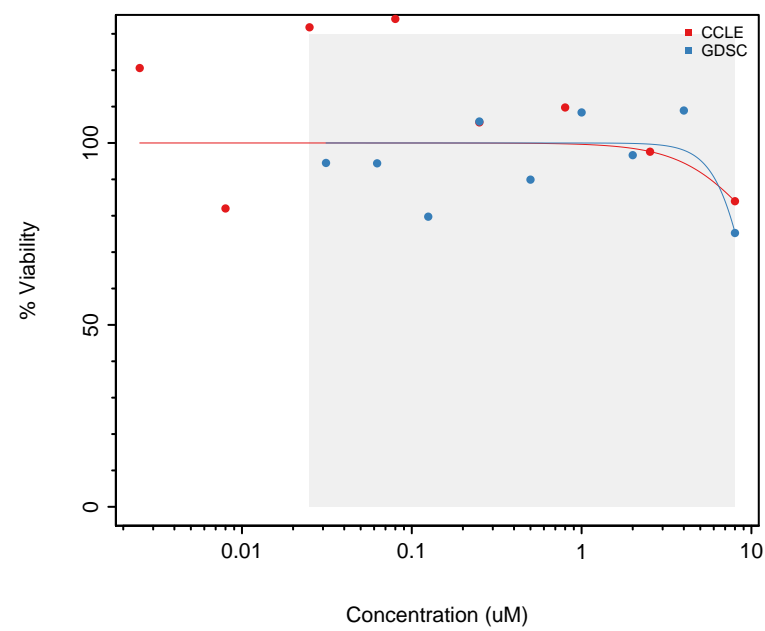

Nutlin-3:SW1573

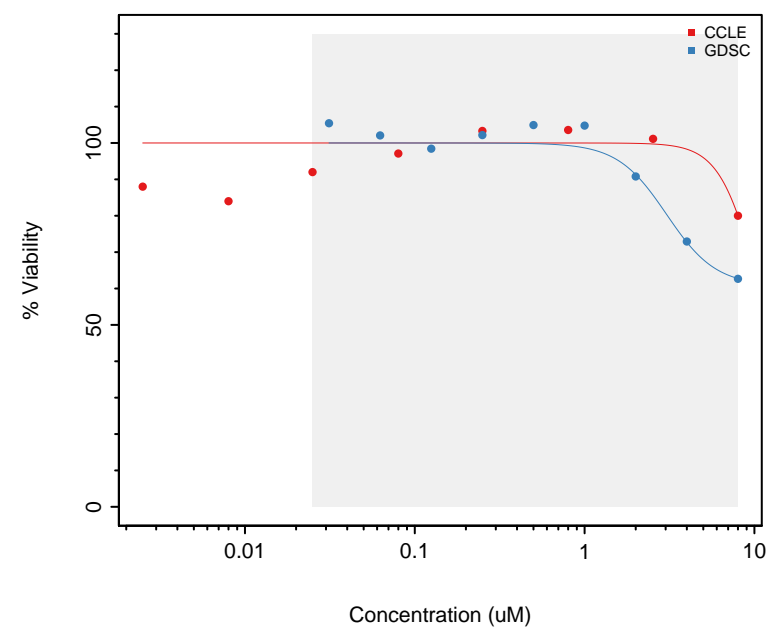



Nutlin-3:TYK-nu

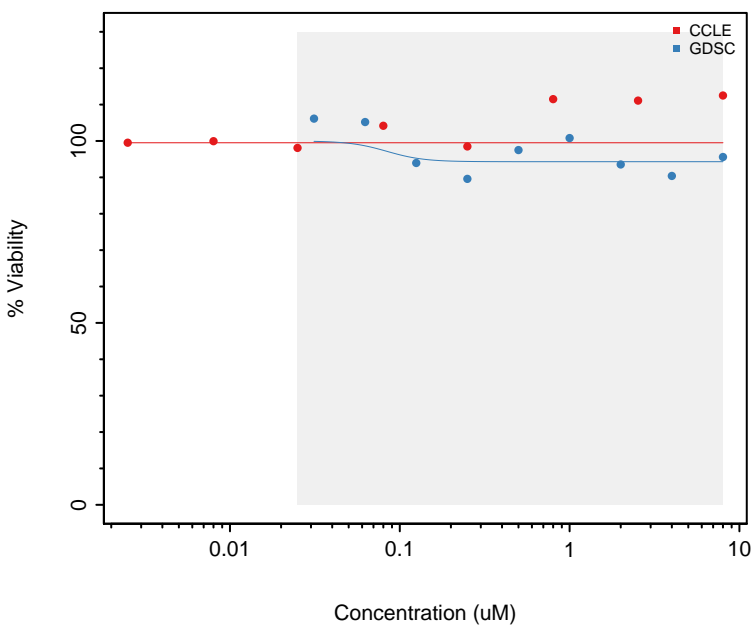

Nutlin-3:U-118-MG

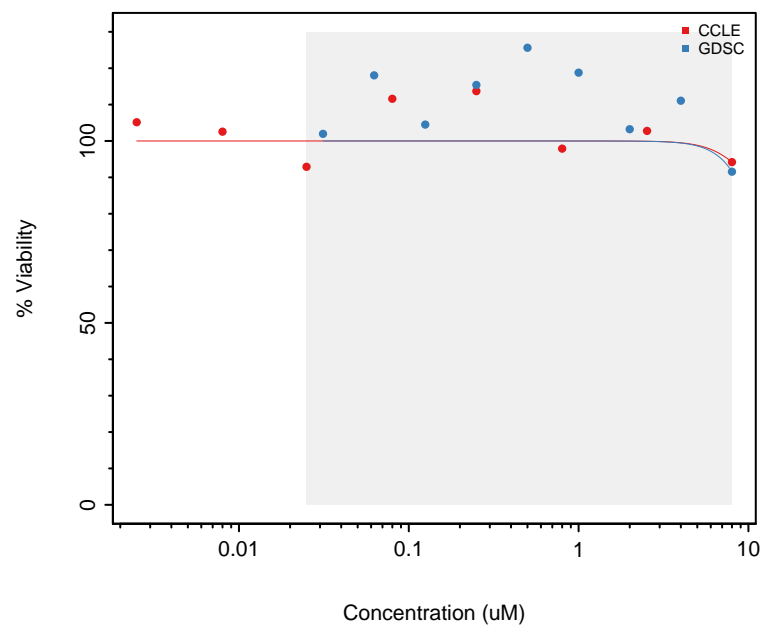

Nutlin-3:U-2-OS

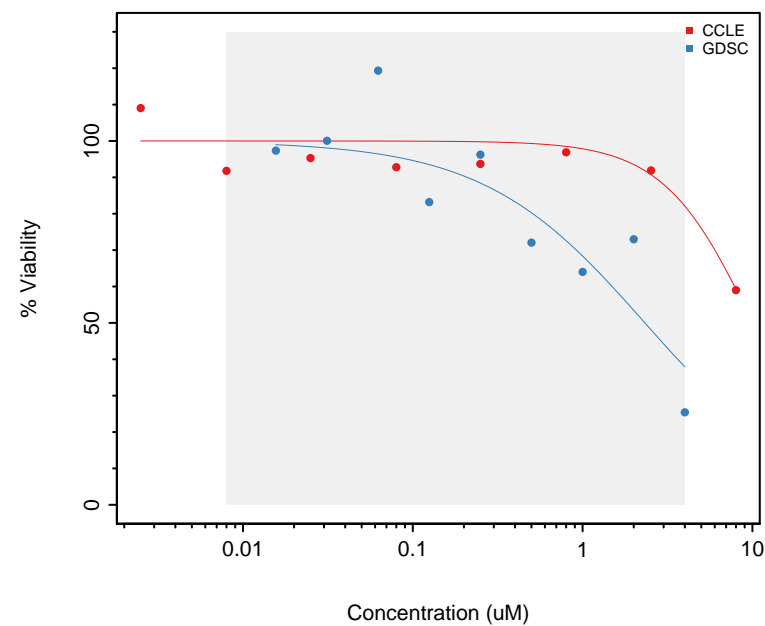

Nutlin-3:U-87-MG

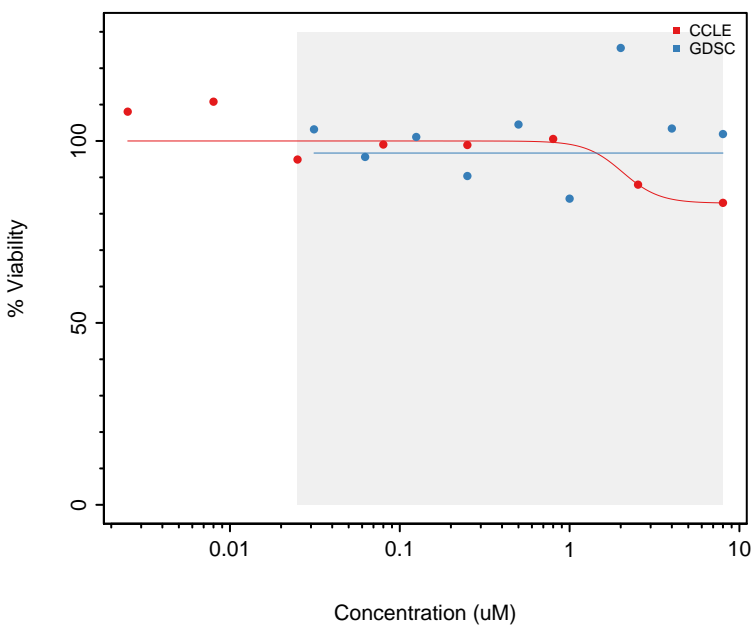

Nutlin-3:UACC-257

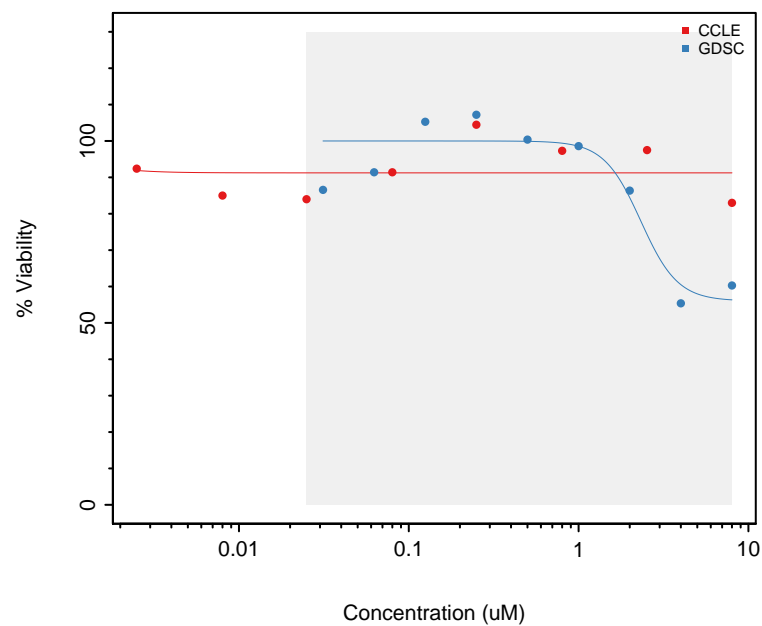

Nutlin-3:UACC-62

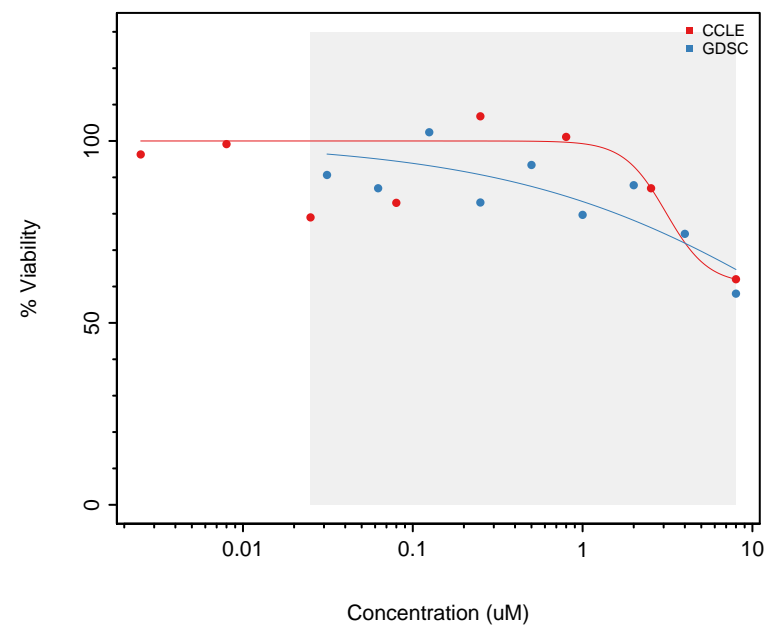

Nutlin-3:UM-UC-3

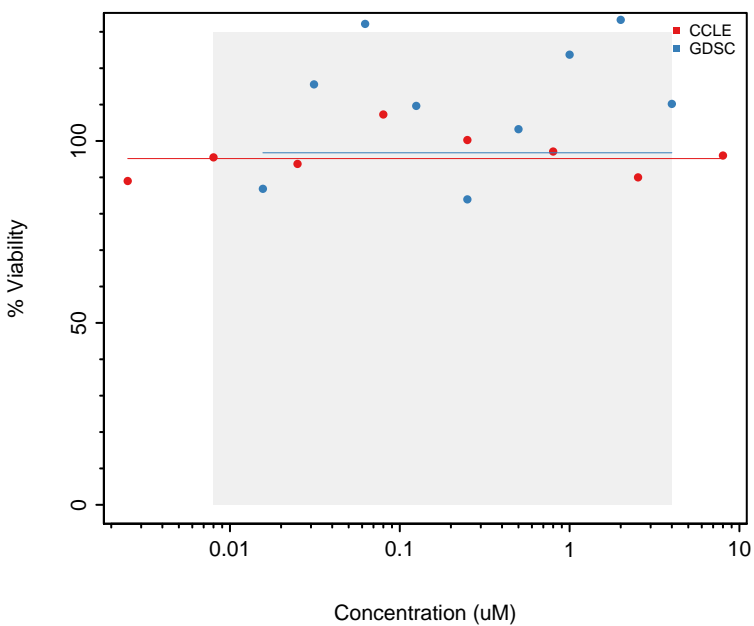

Nutlin-3:WM-115

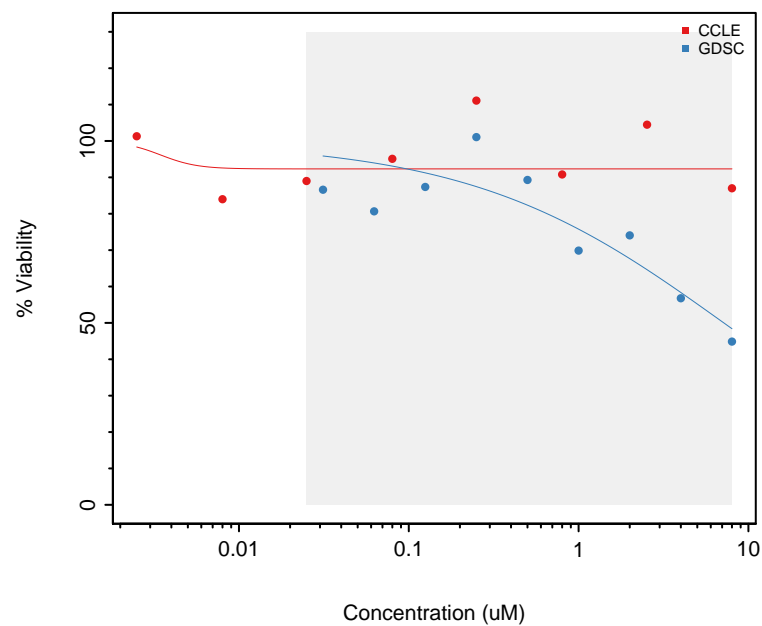

Nutlin-3:YKG-1

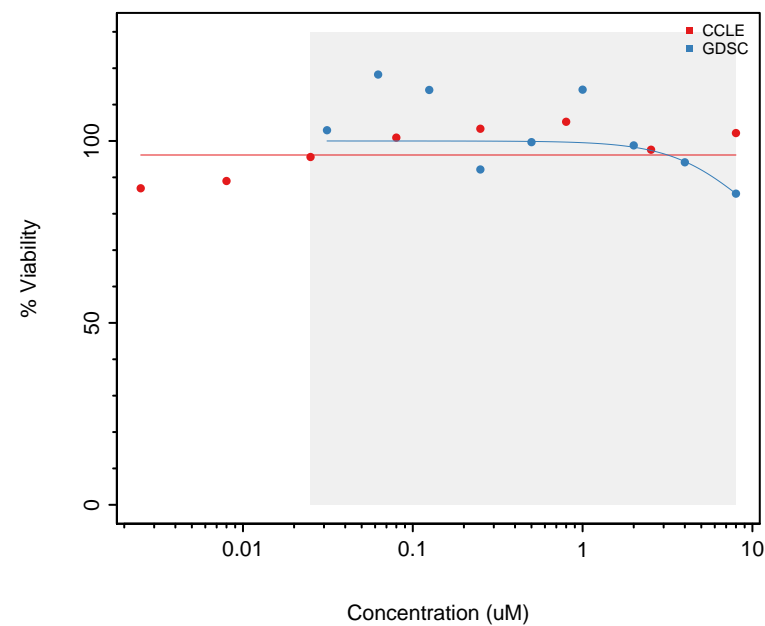

Nutlin-3:ZR-75-30

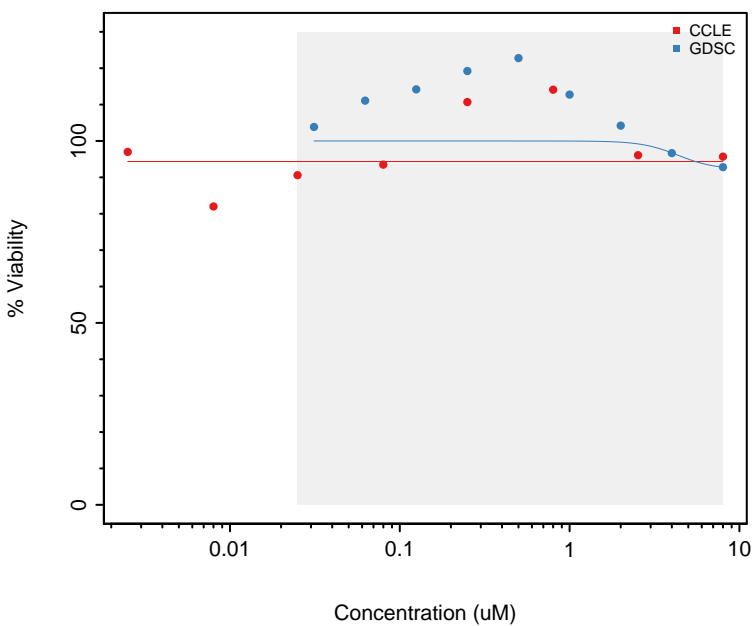

AZD0530:697

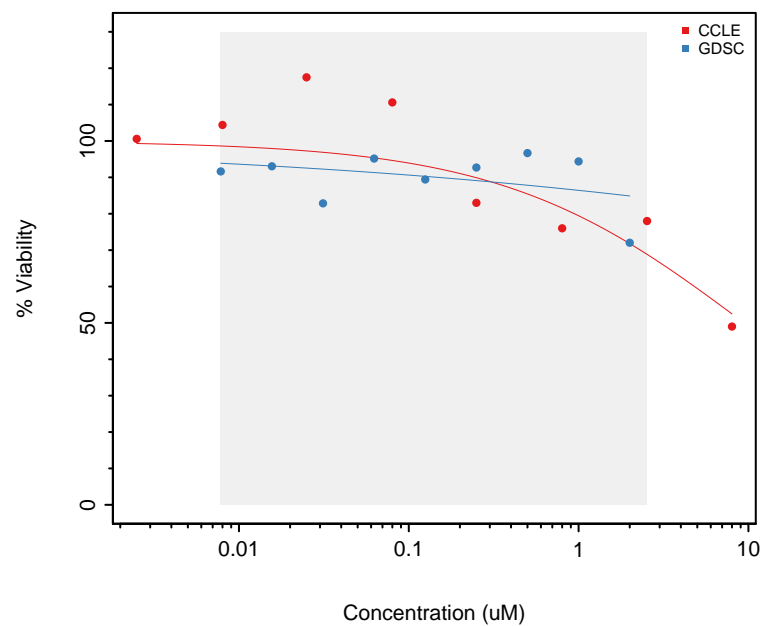

AZD0530:8-MG-BA

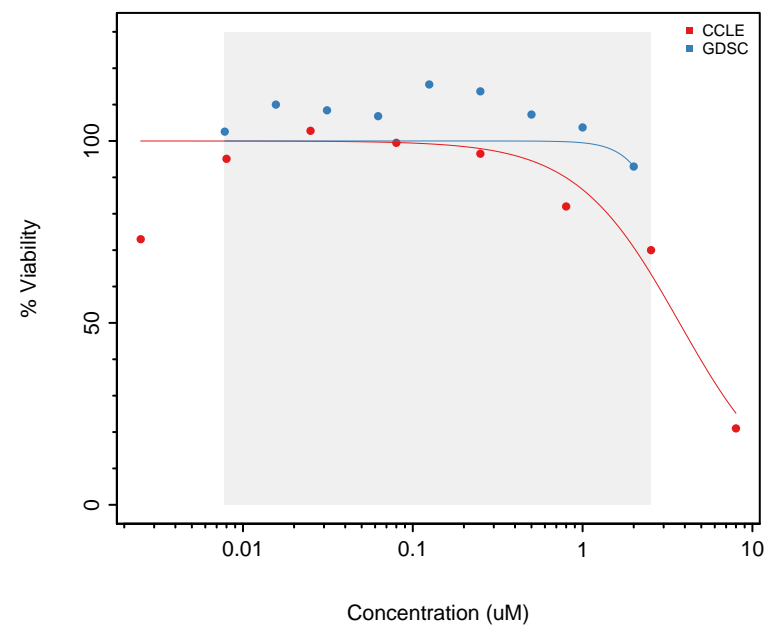

AZD0530:A253

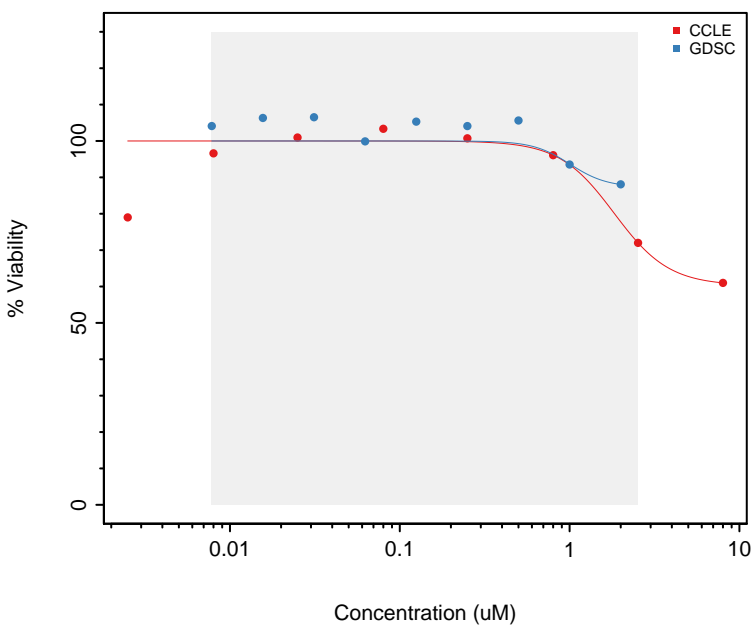

AZD0530:BL-41

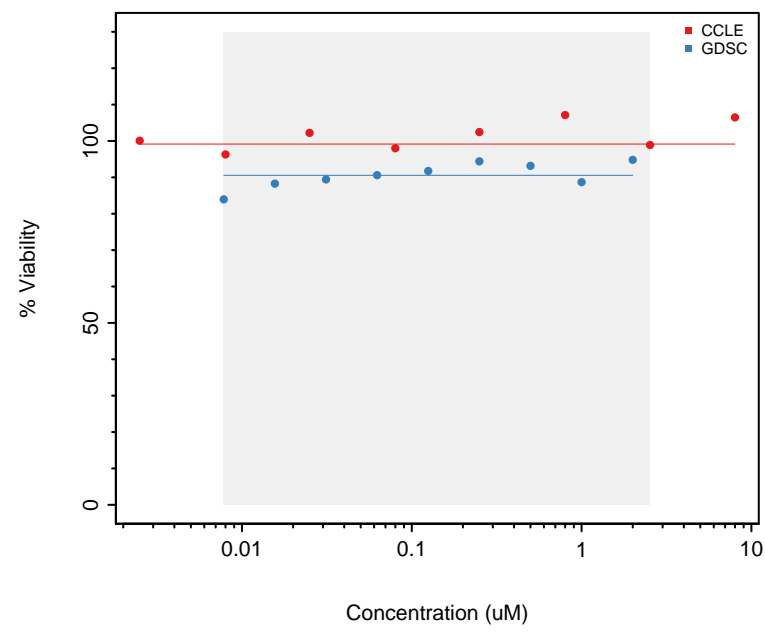

AZD0530:BL-70

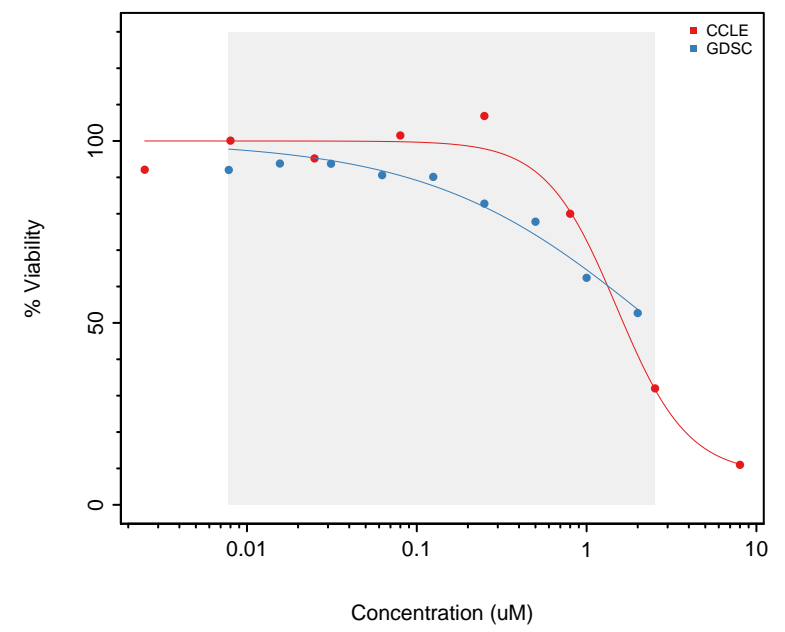

AZD0530:BT-474

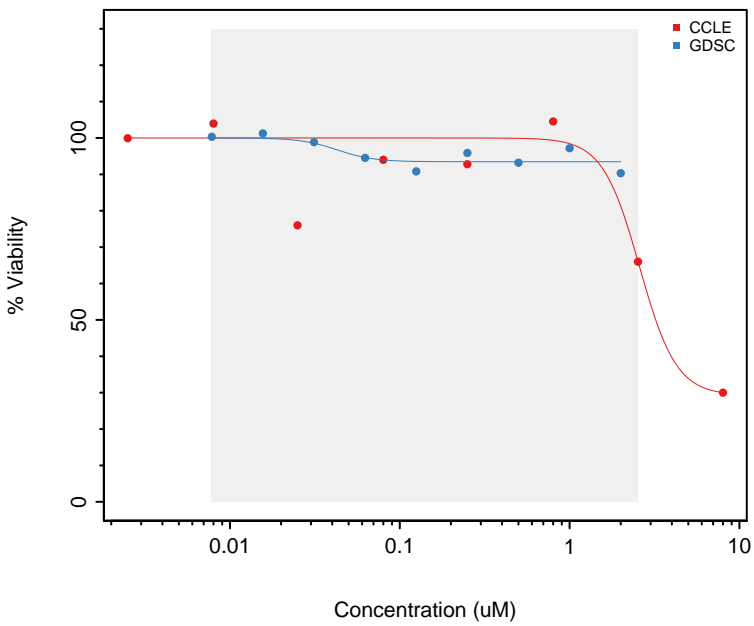

AZD0530:C2BBe1

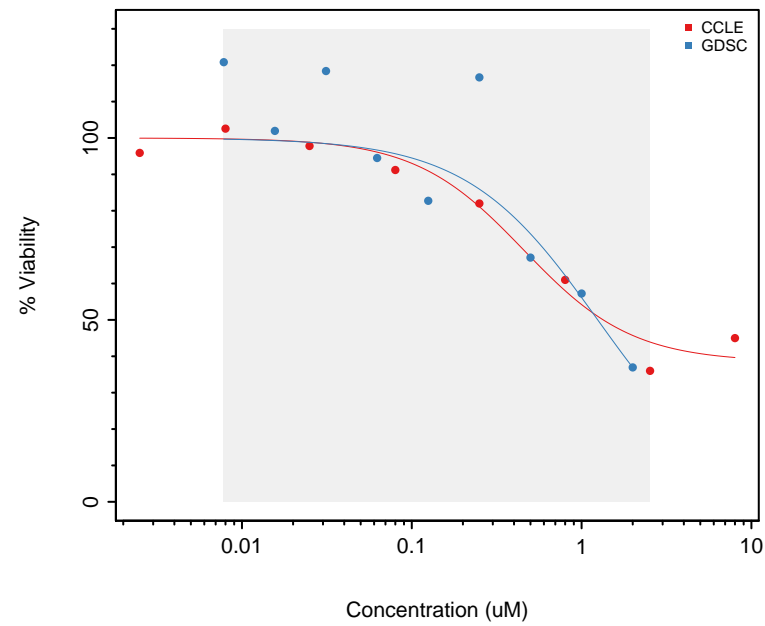

AZD0530:Calu-6

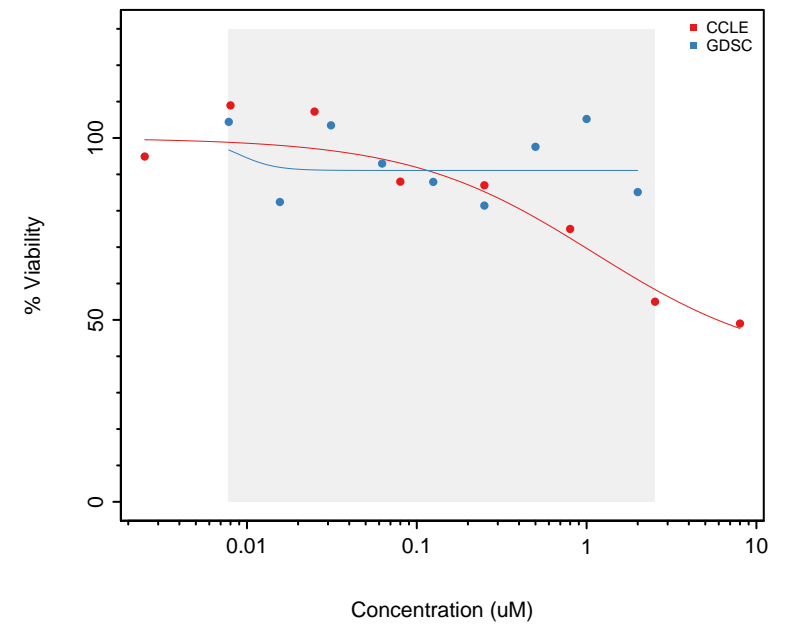

AZD0530:CAS-1

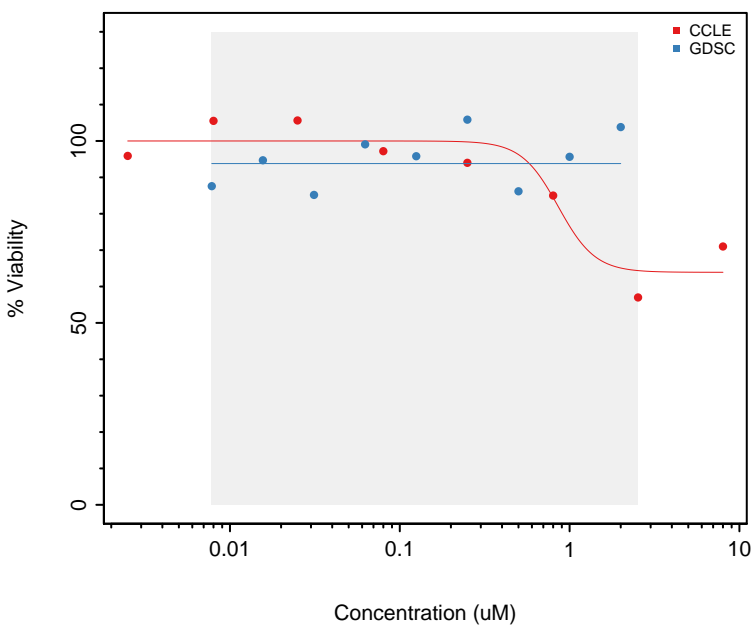

AZD0530:COLO-320-HSR

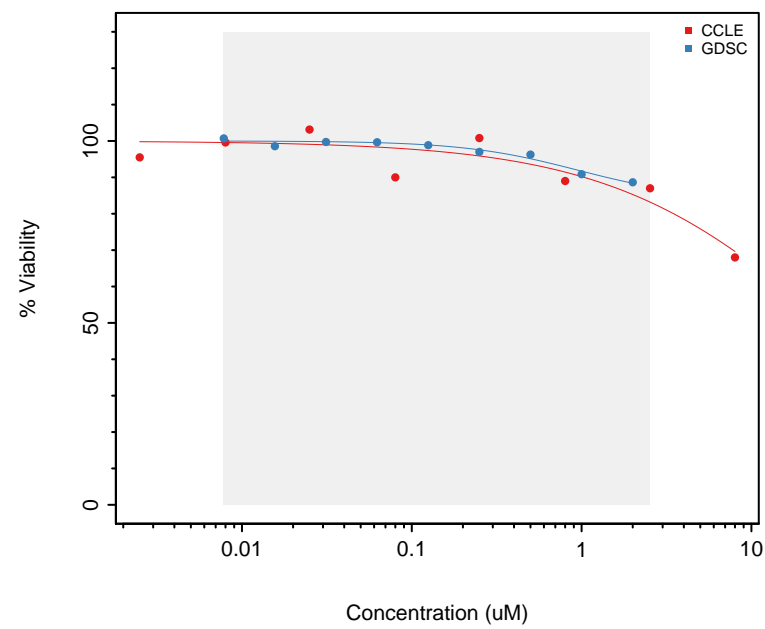

AZD0530:DEL

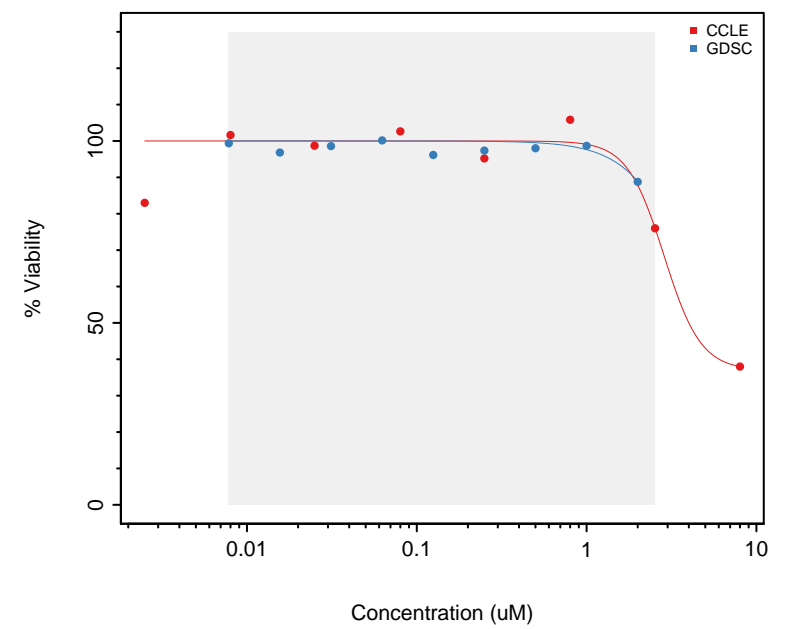

AZD0530:DMS-114

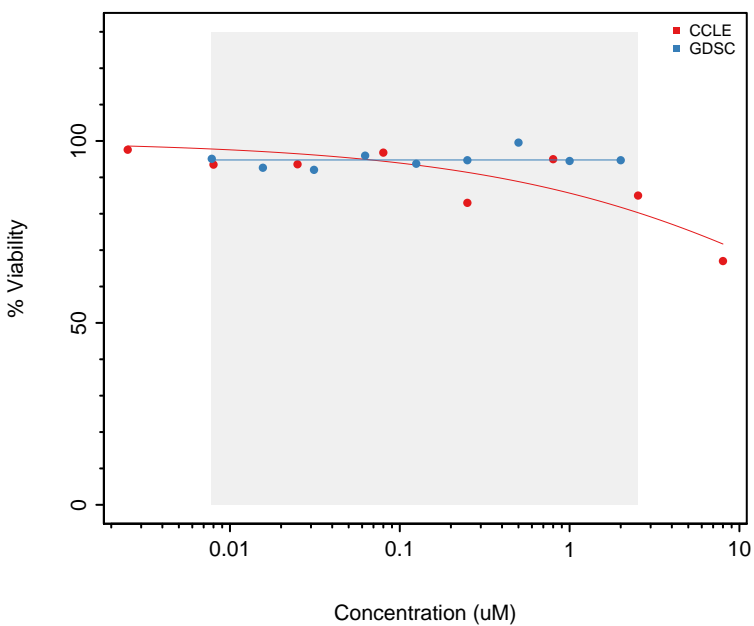

AZD0530:DOHH-2

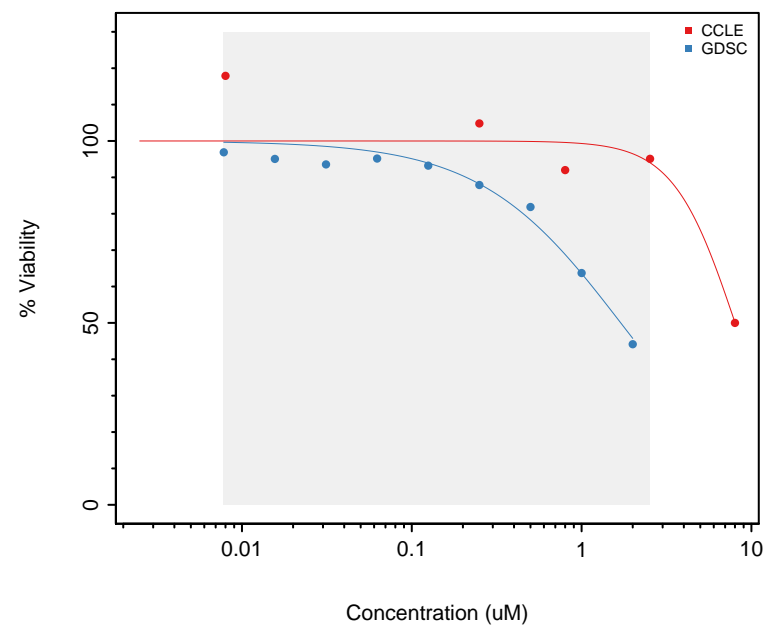

AZD0530:EB2

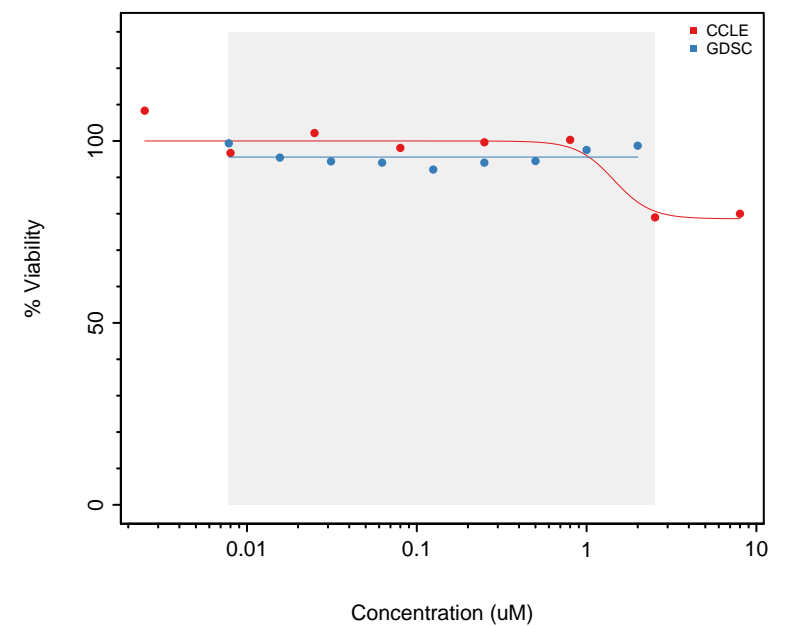



AZD0530:KARPAS-299

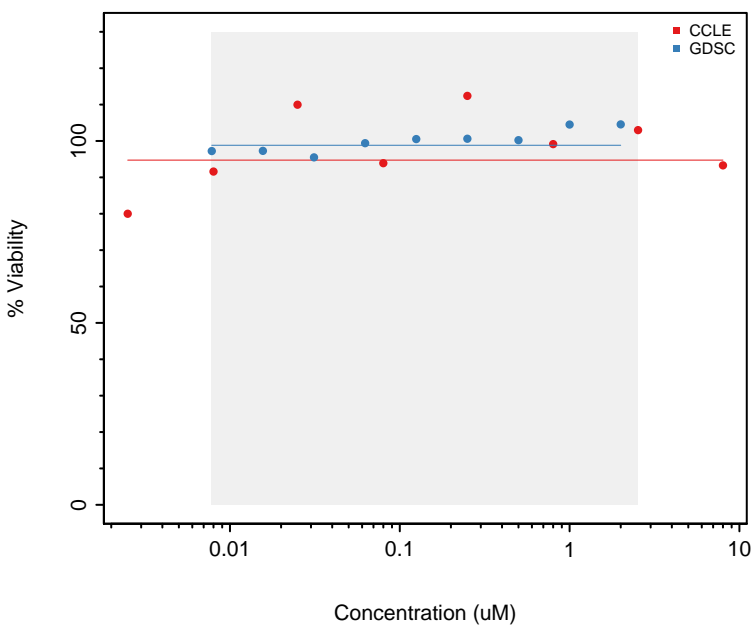

AZD0530:KARPAS-422

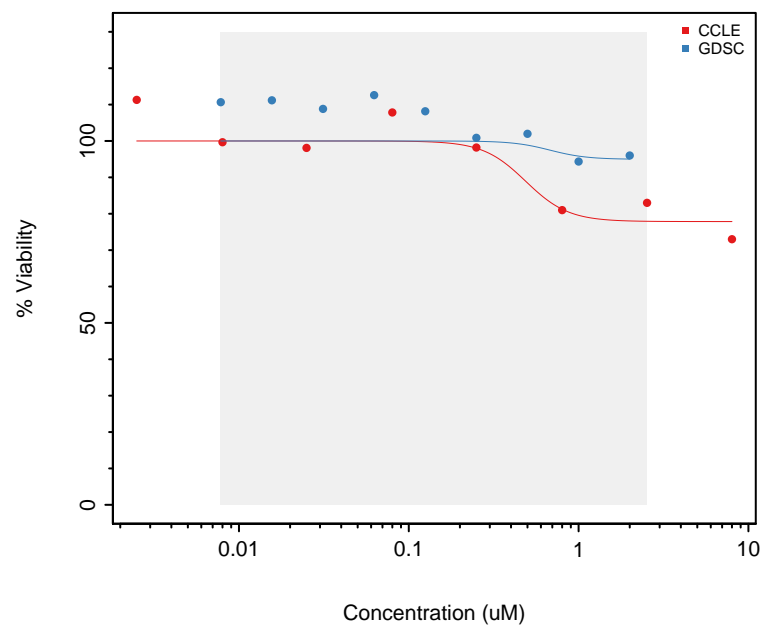

AZD0530:KG-1

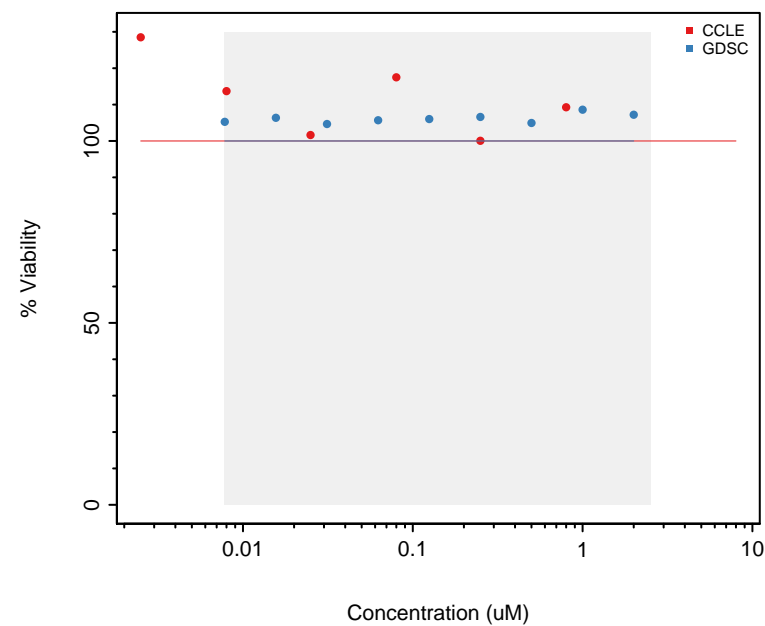

AZD0530:KLE

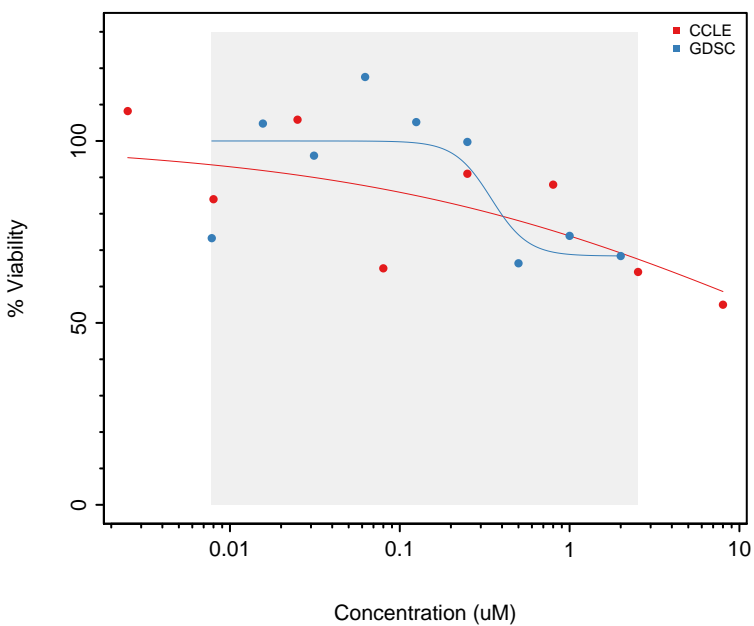

AZD0530:KNS-42

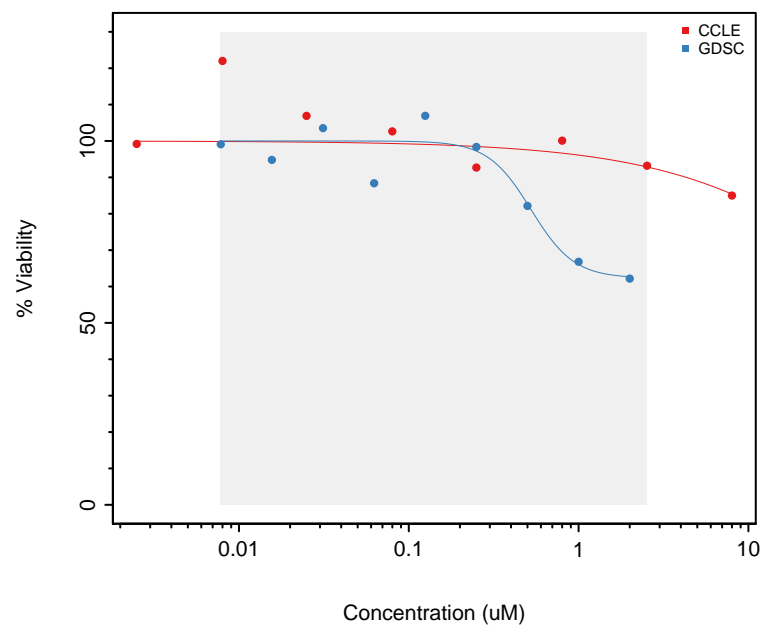

AZD0530:KNS-81-FD

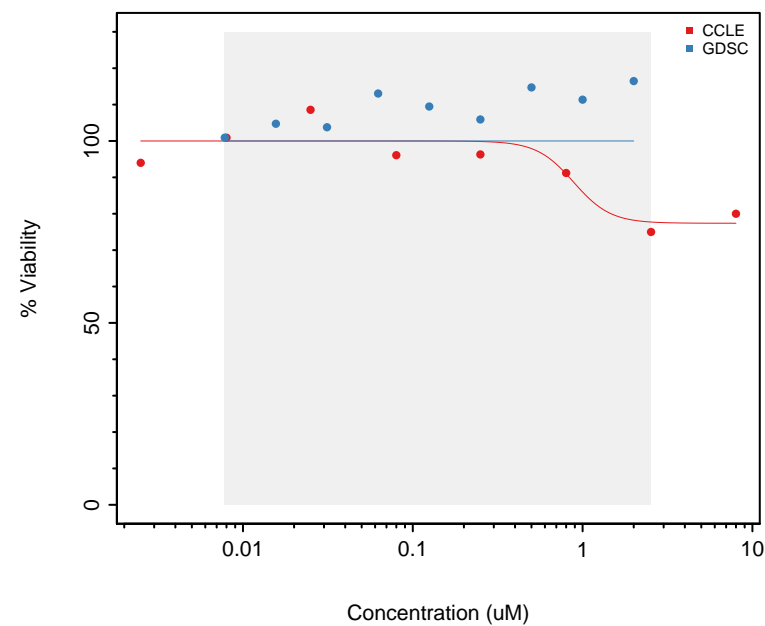

AZD0530:K052

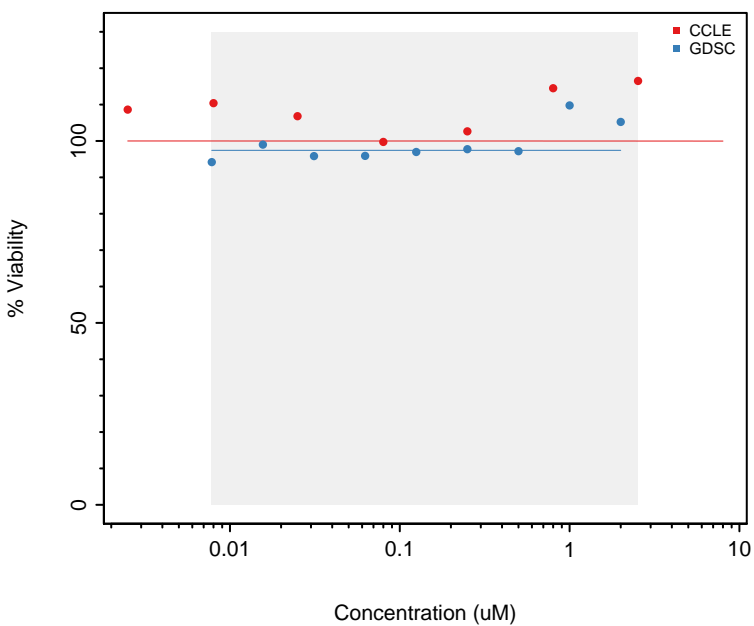

AZD0530:KU812

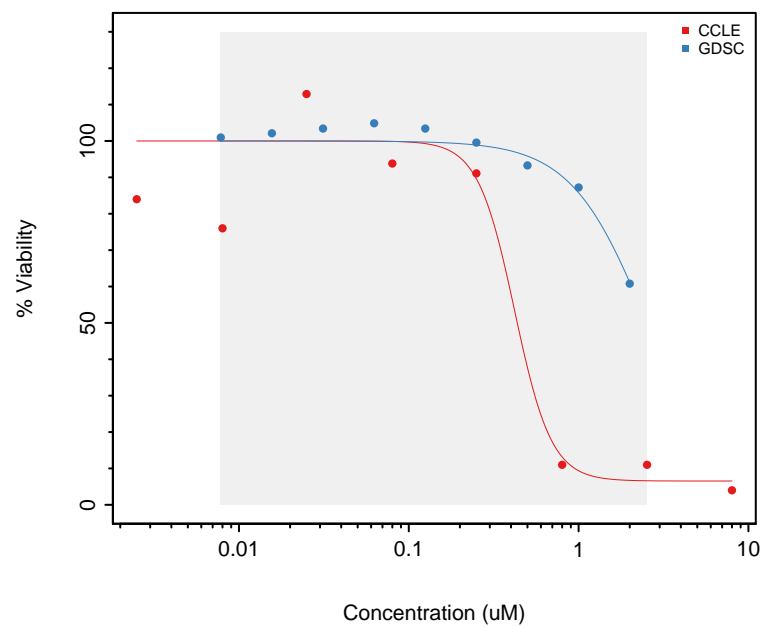

AZD0530:KURAMOCHI

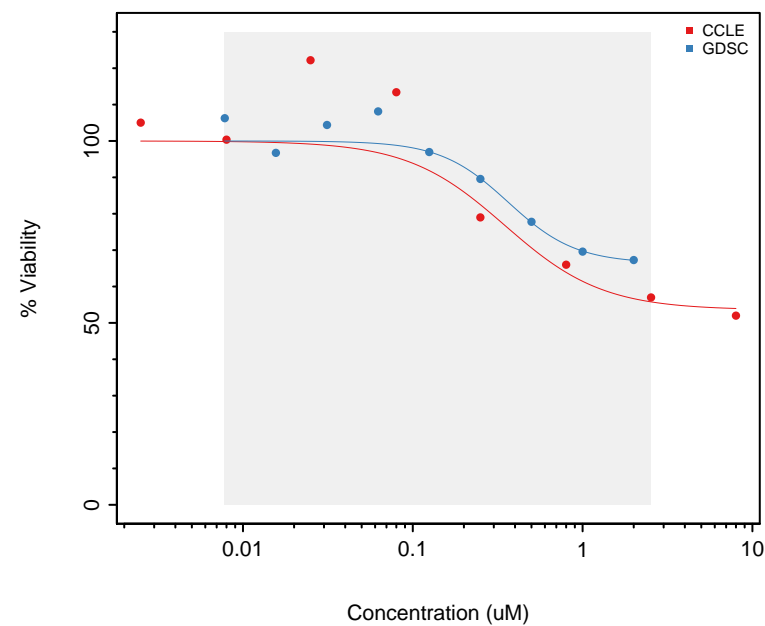

AZD0530:L-363

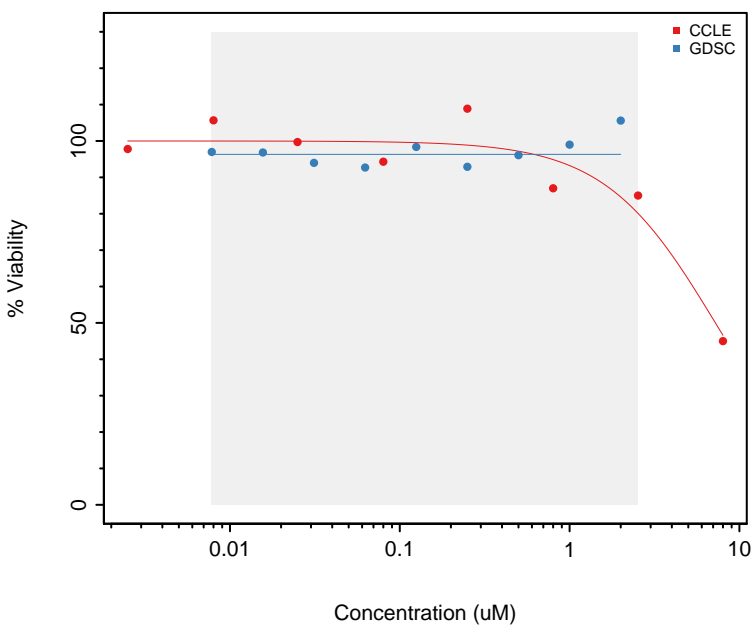

AZD0530:L-428

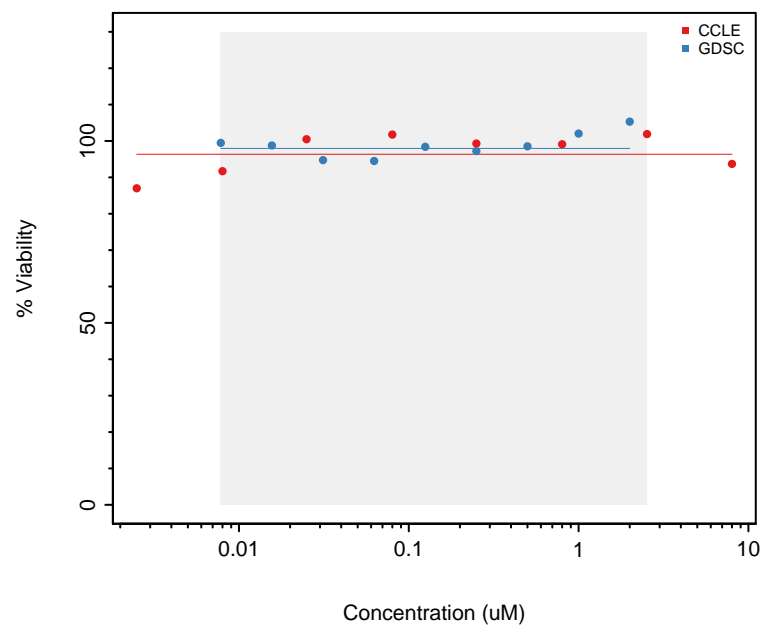

AZD0530:LOXIMVI

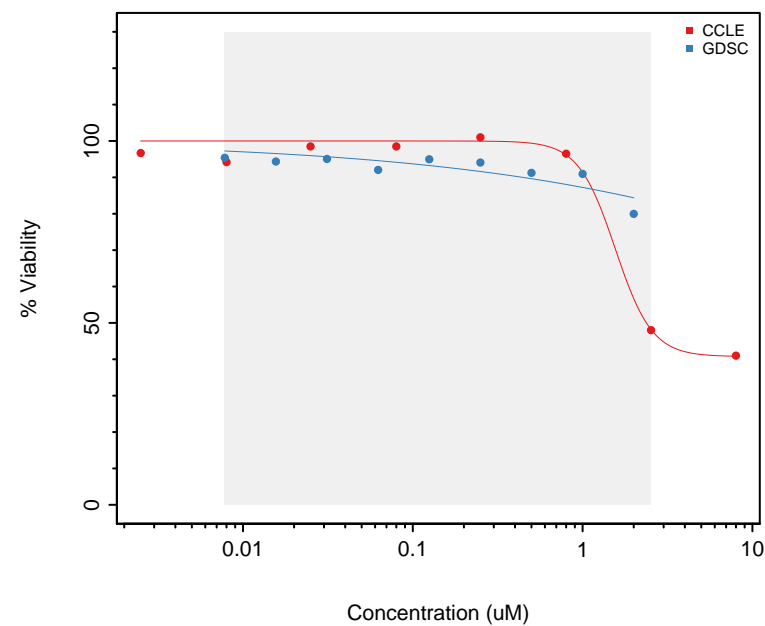

AZD0530:LP-1

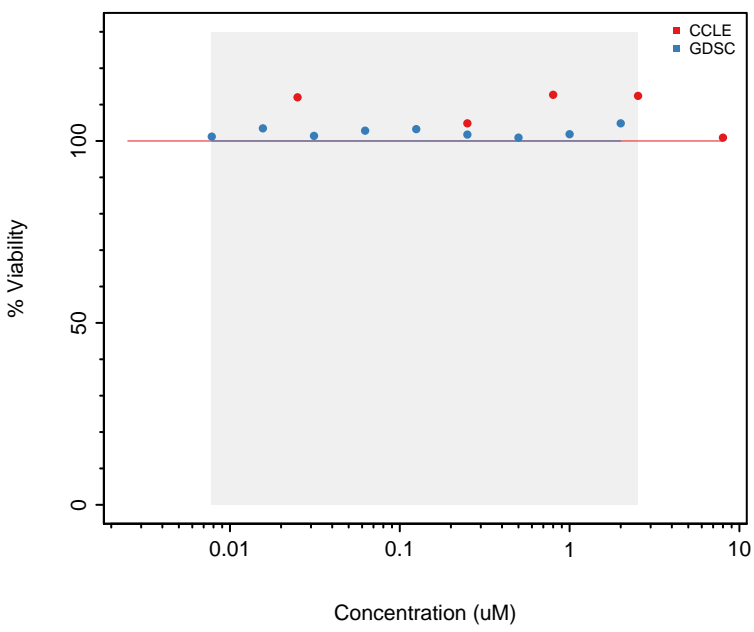

AZD0530:LS-123

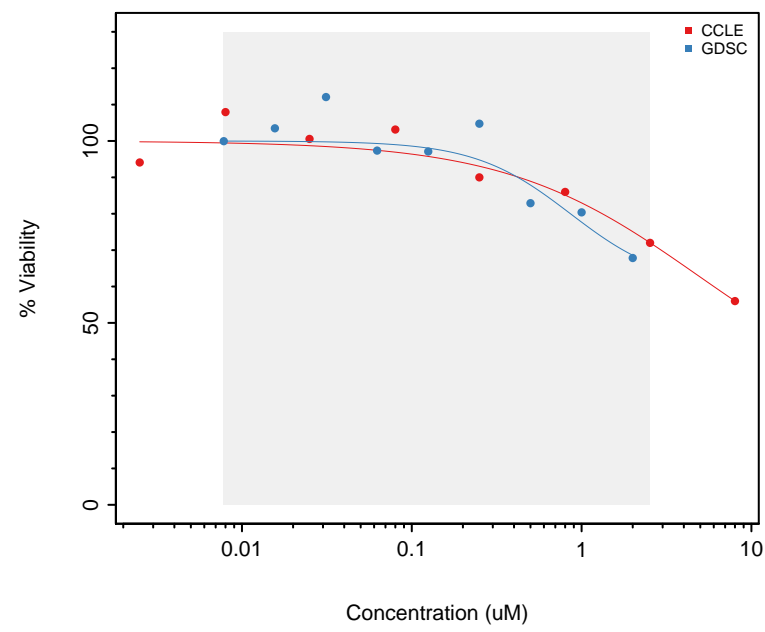

AZD0530:LS-411N

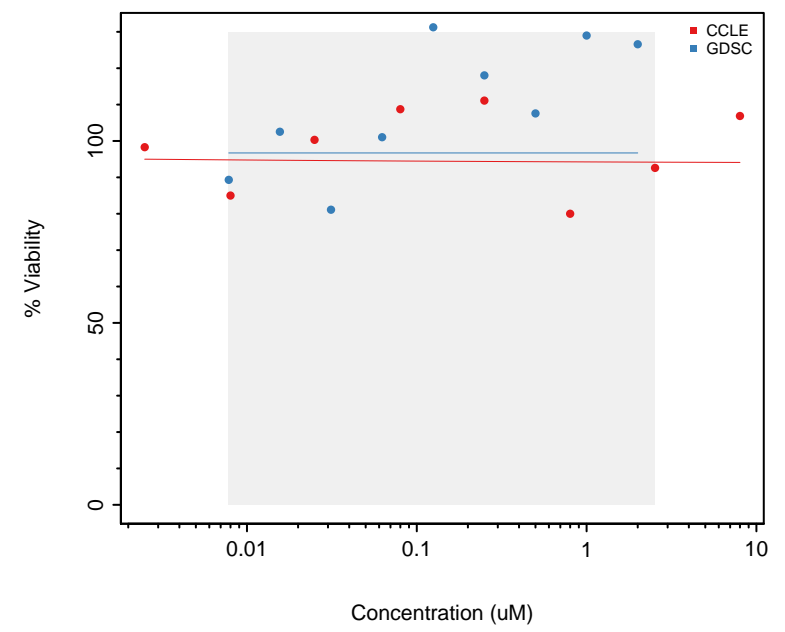

AZD0530:LS-513

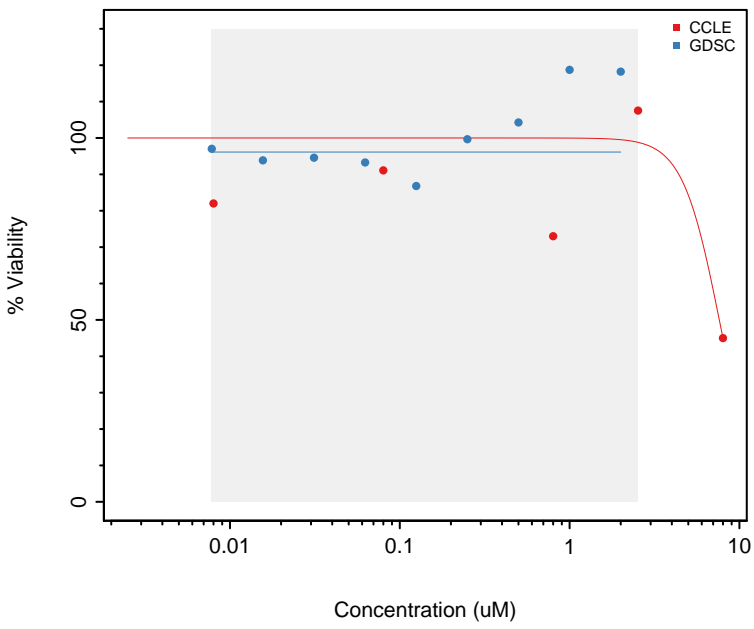

AZD0530:MC116

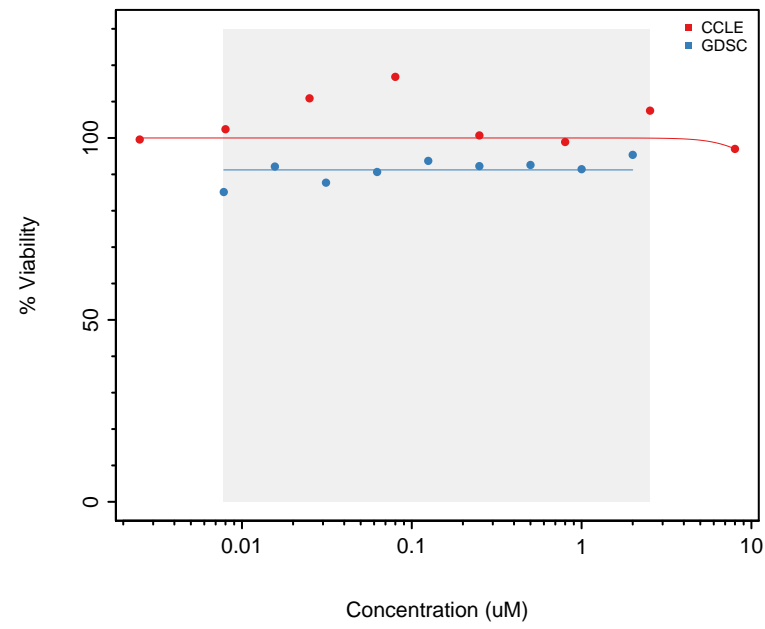

AZD0530:MEG-01

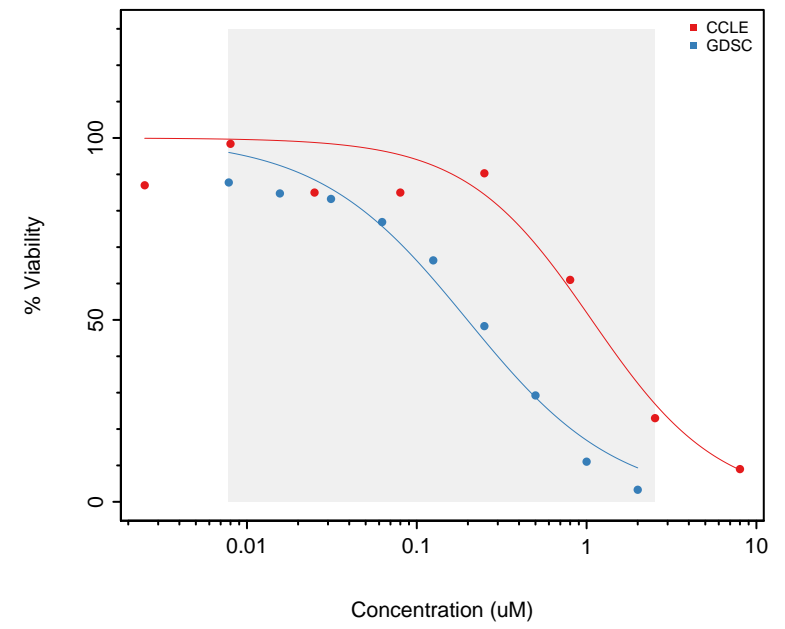

AZD0530:MPP-89

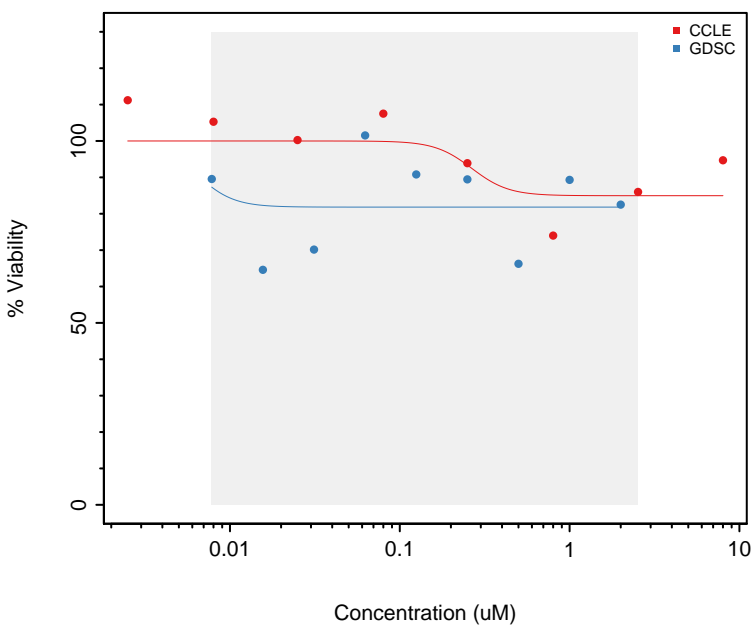

AZD0530:MSTO-211H

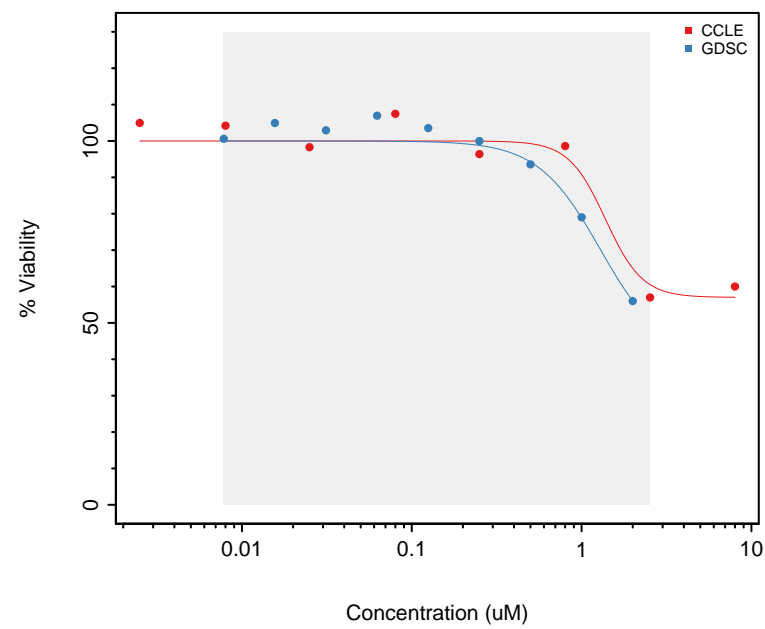

AZD0530:NCI-H1092

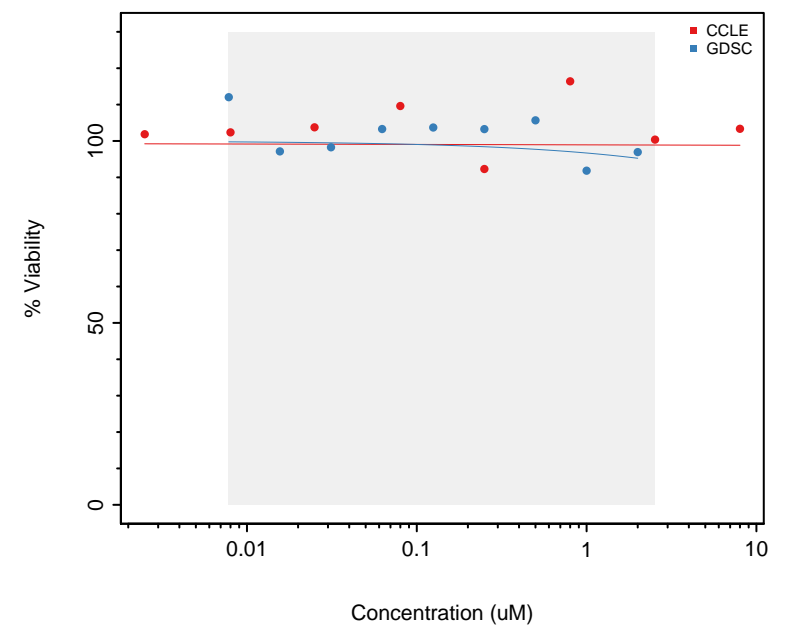

AZD0530:NCI-H1155

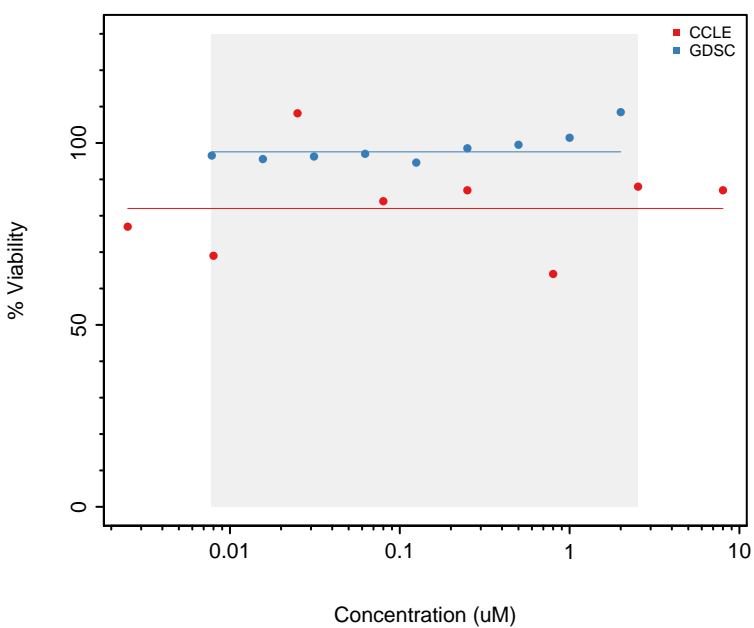

AZD0530:NCI-H1299

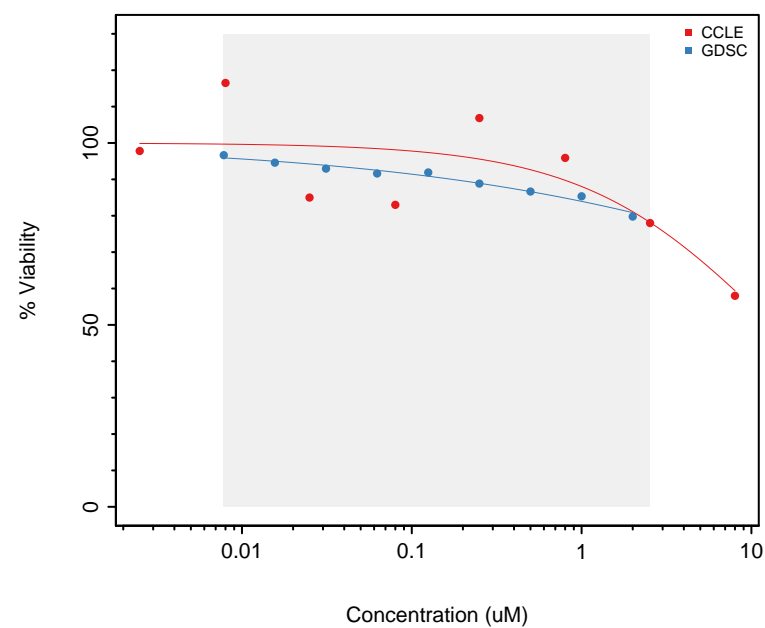

AZD0530:NCI-H1355

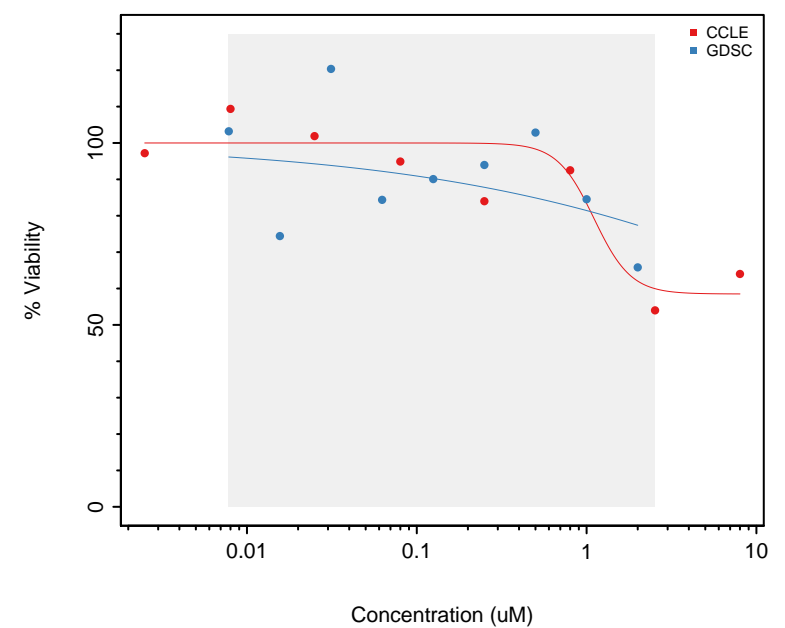







AZD0530:SK-LMS-1

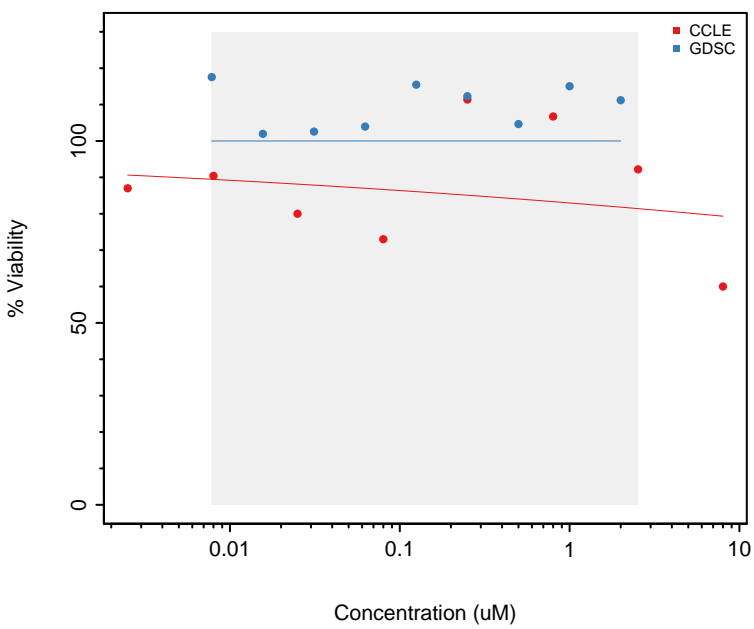

AZD0530:SK-MEL-2

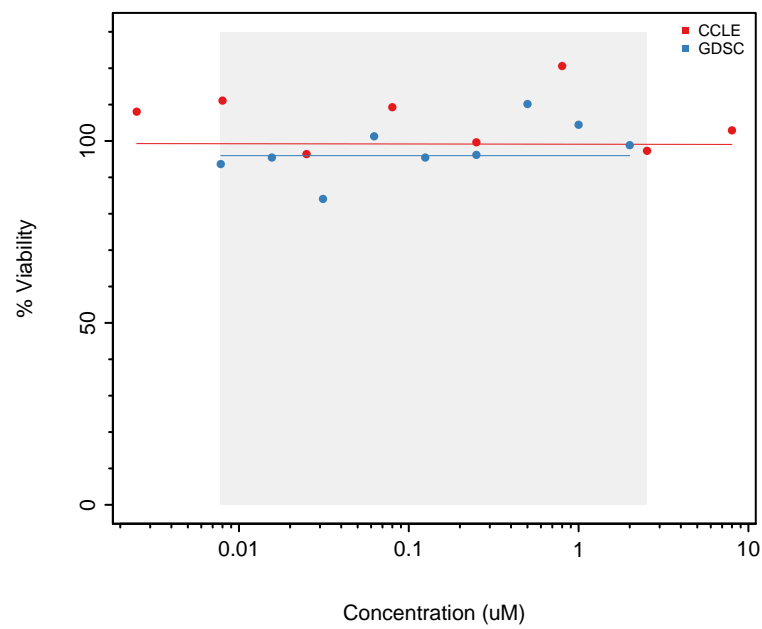

AZD0530:SK-MM-2

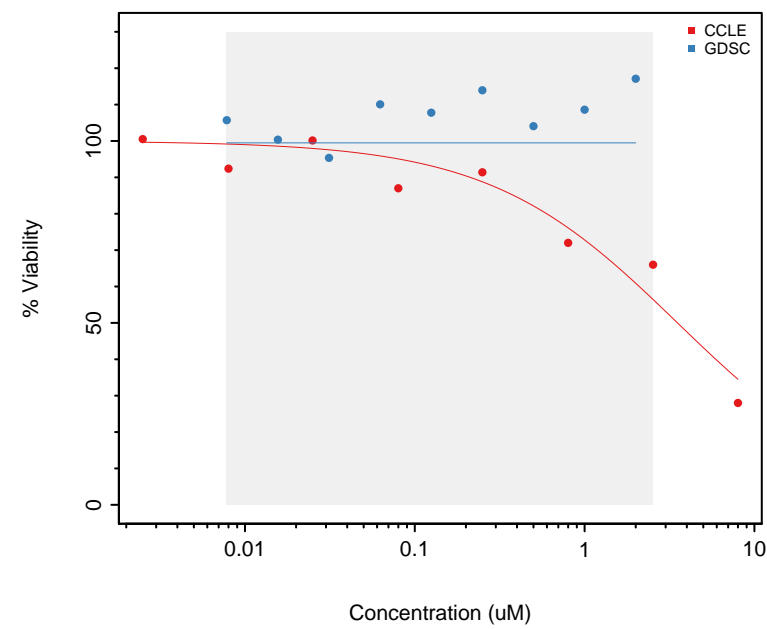

AZD0530:SK-N-DZ

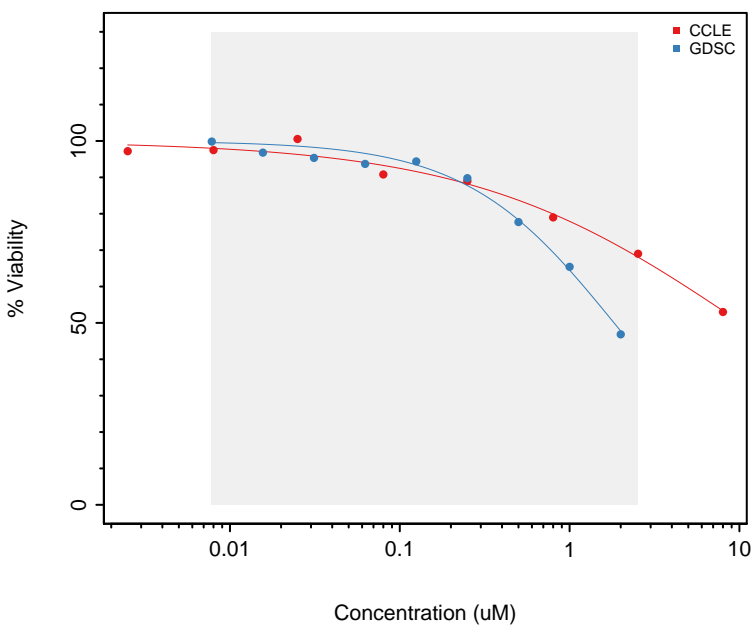

AZD0530:NCI-SNU-1

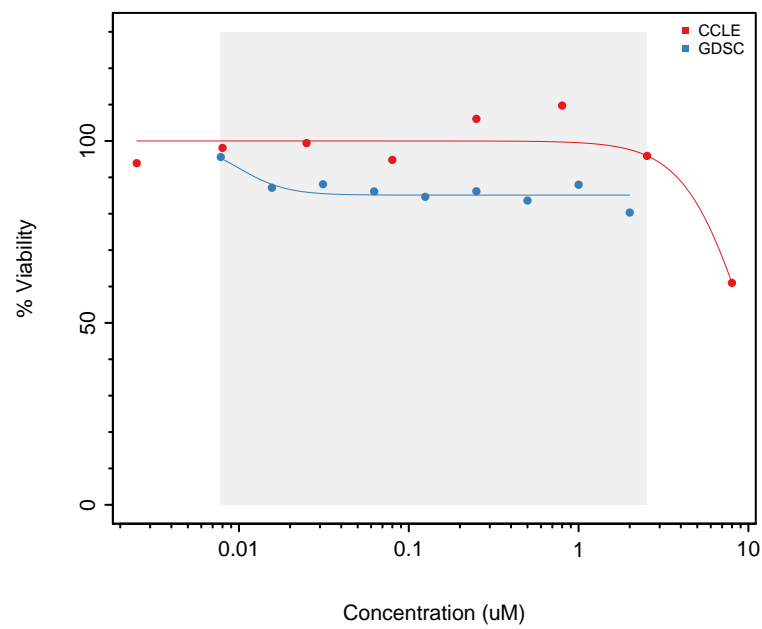

AZD0530:SNU-C2B

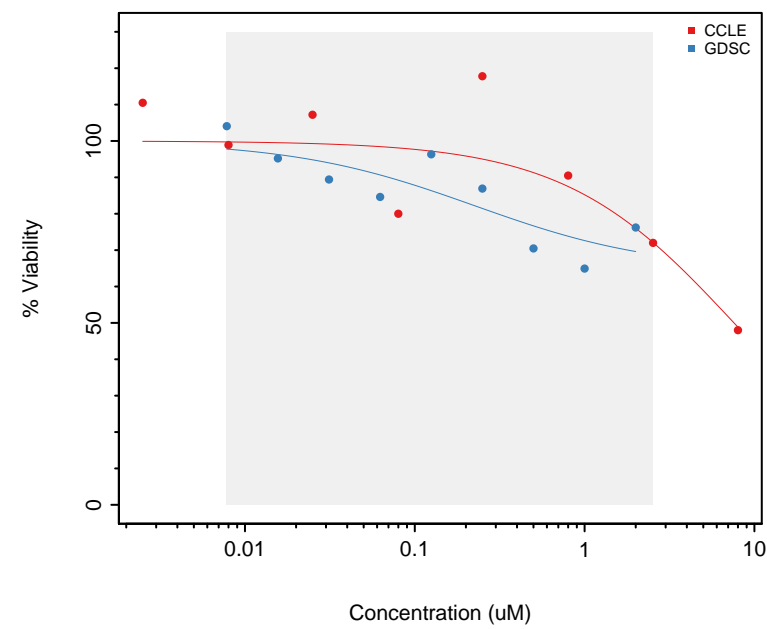

AZD0530:SUP-T1

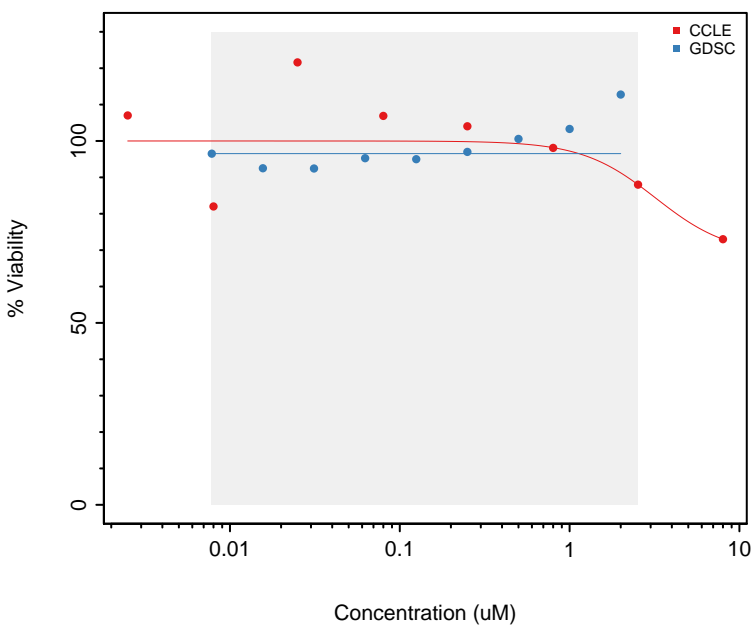

AZD0530:TE-1

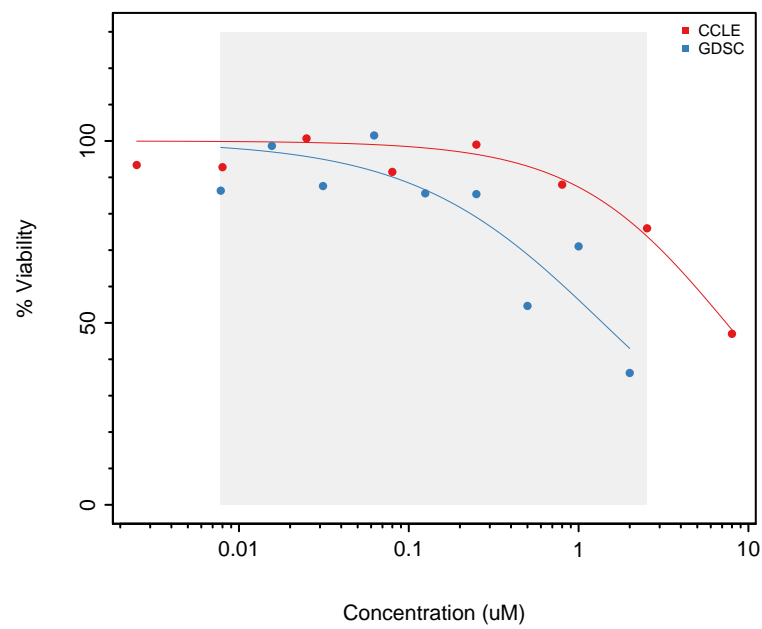

AZD0530:TE-11

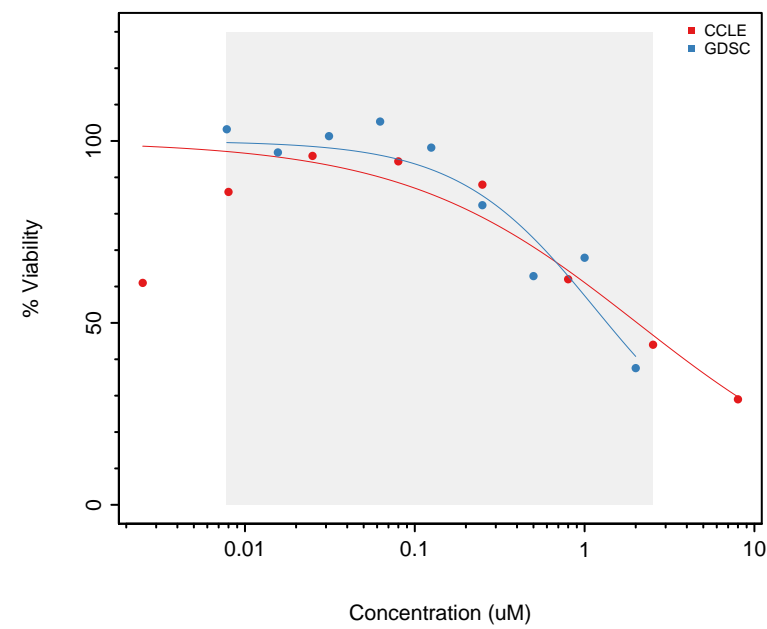

AZD0530:TE-15

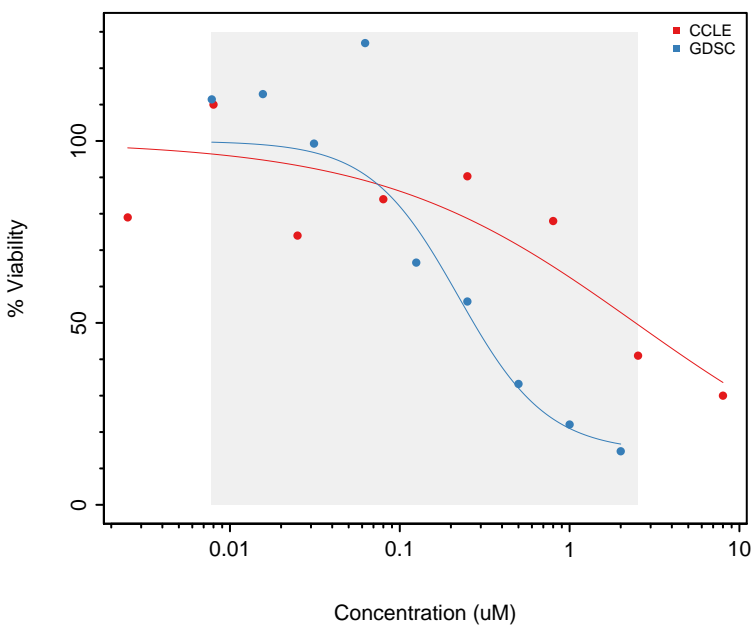

AZD0530:TE-5

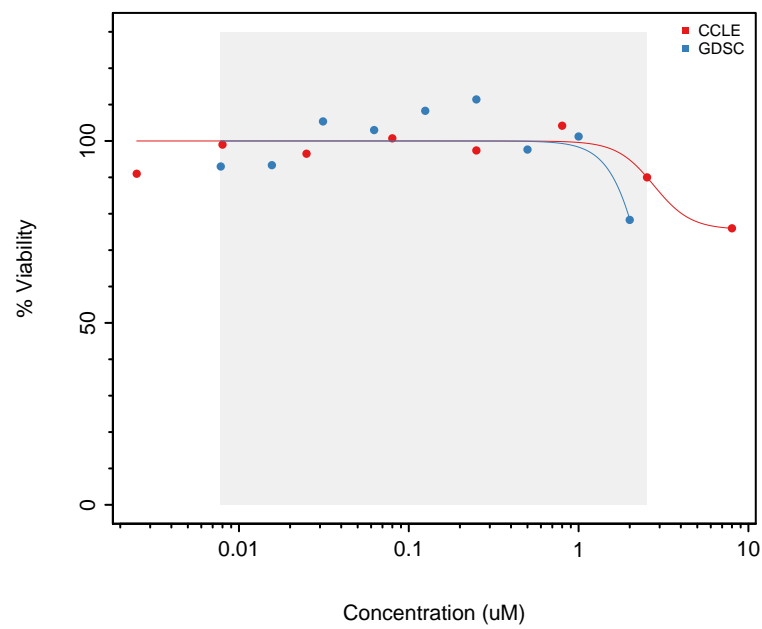

AZD0530:TE-9

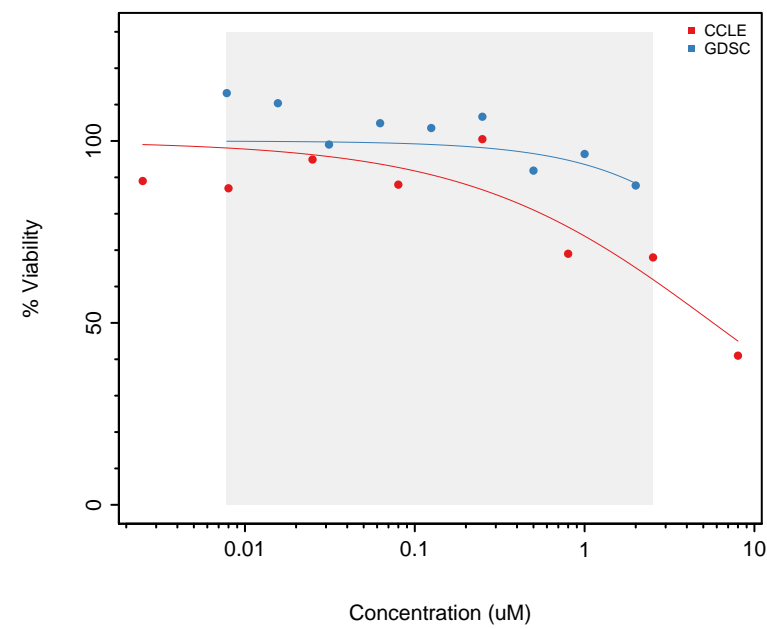

AZD0530:U-87-MG

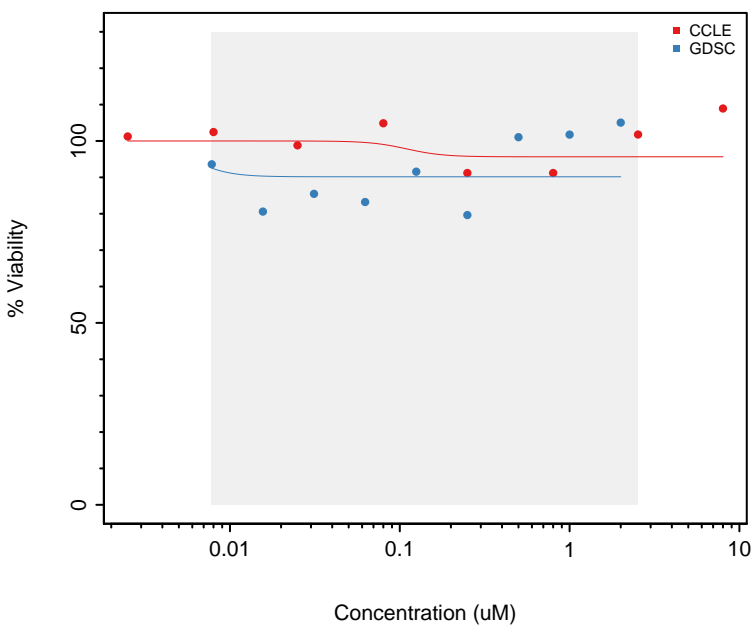

AZD0530:UACC-257

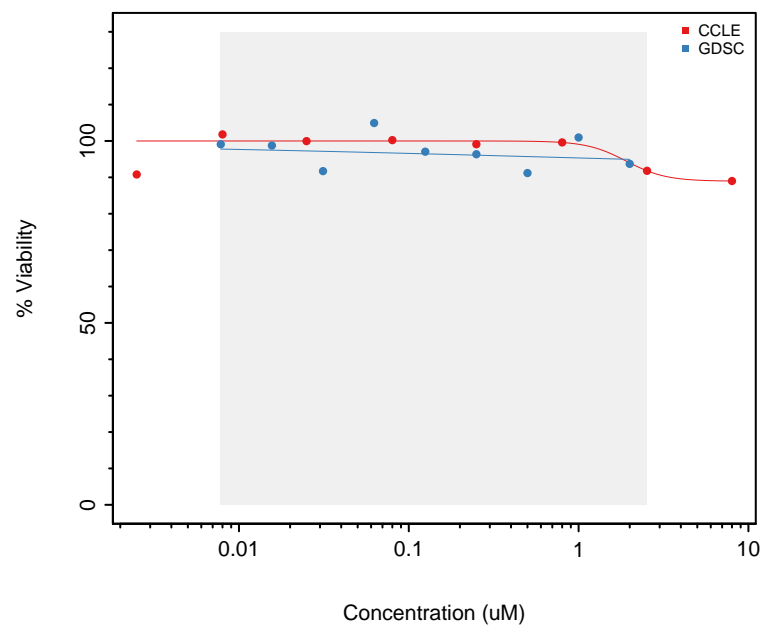

AZD0530:UACC-812

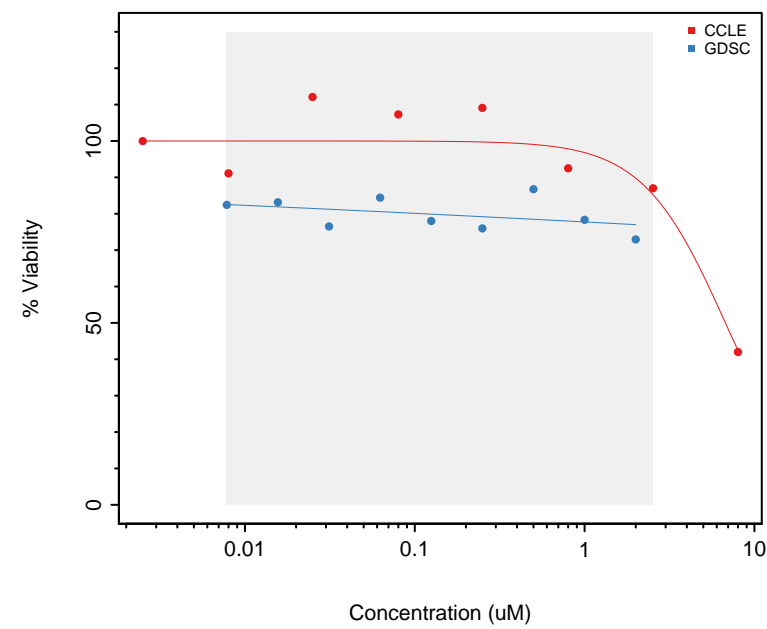

Crizotinib:697

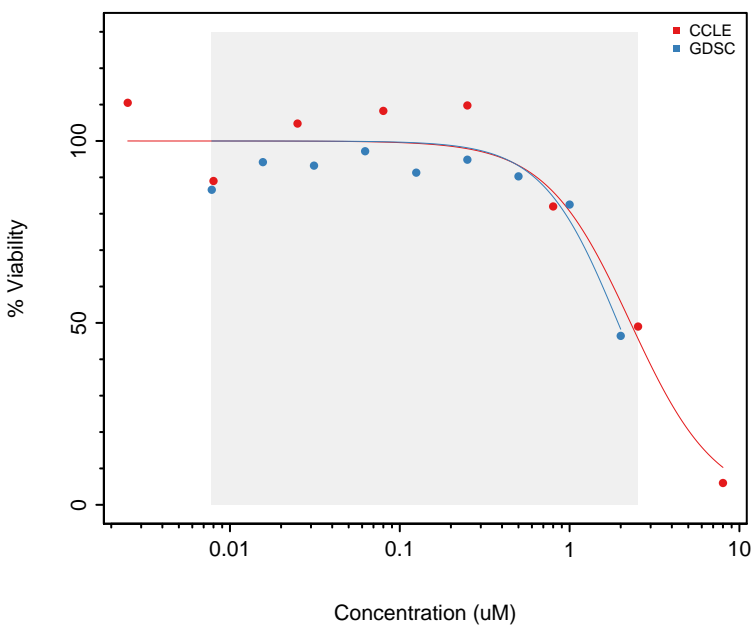

Crizotinib:8-MG-BA

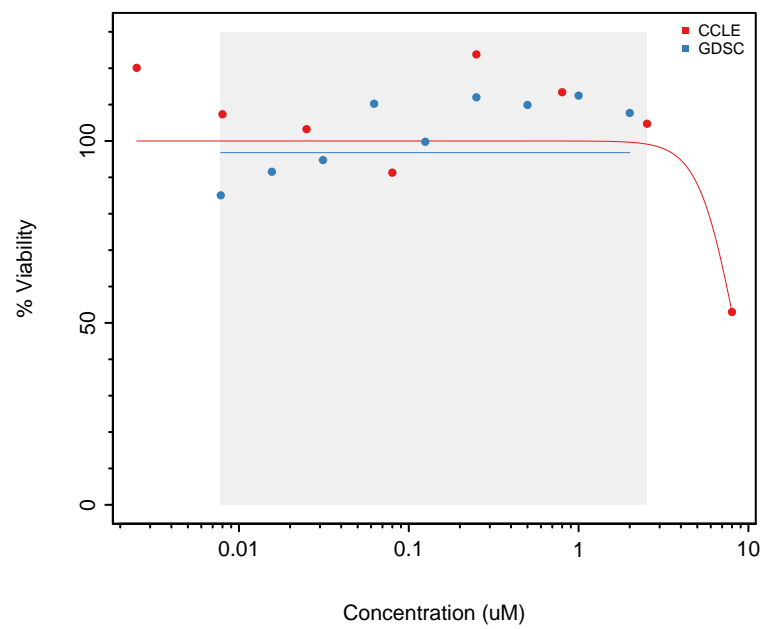

Crizotinib:A253

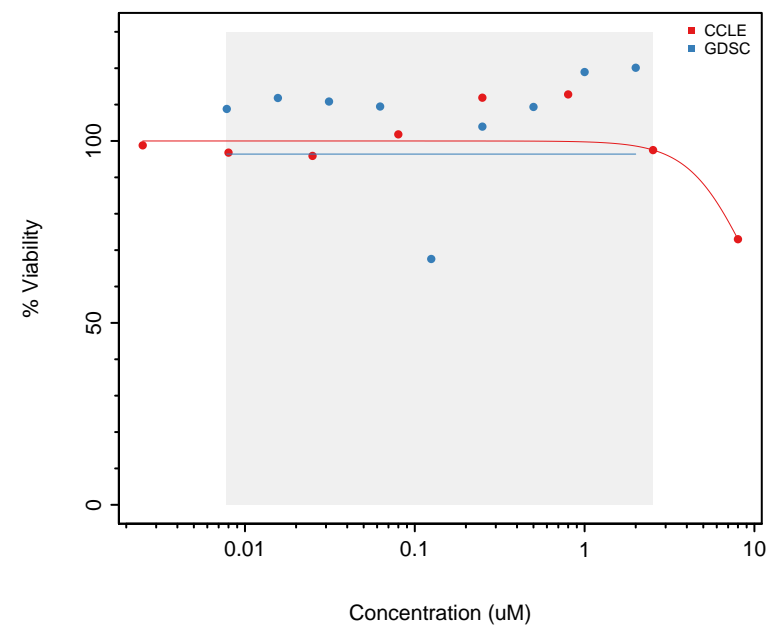

Crizotinib:BL-41

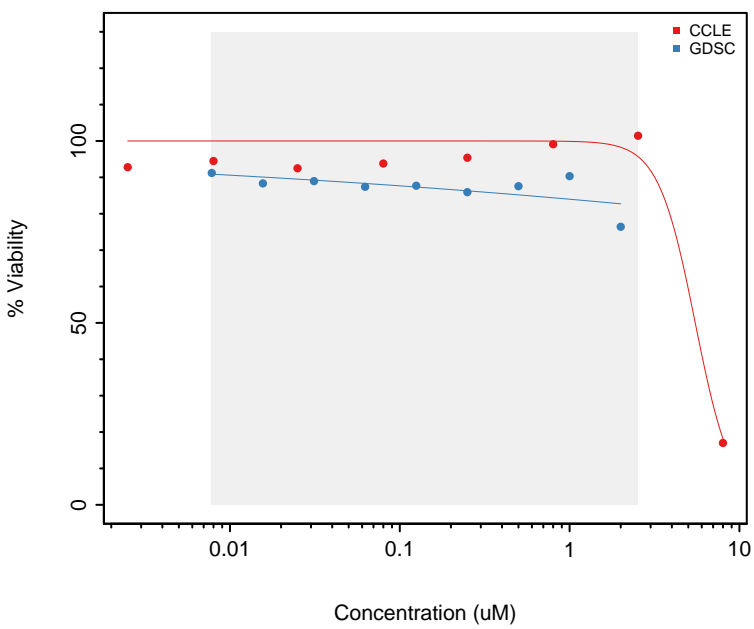

Crizotinib:BL-70

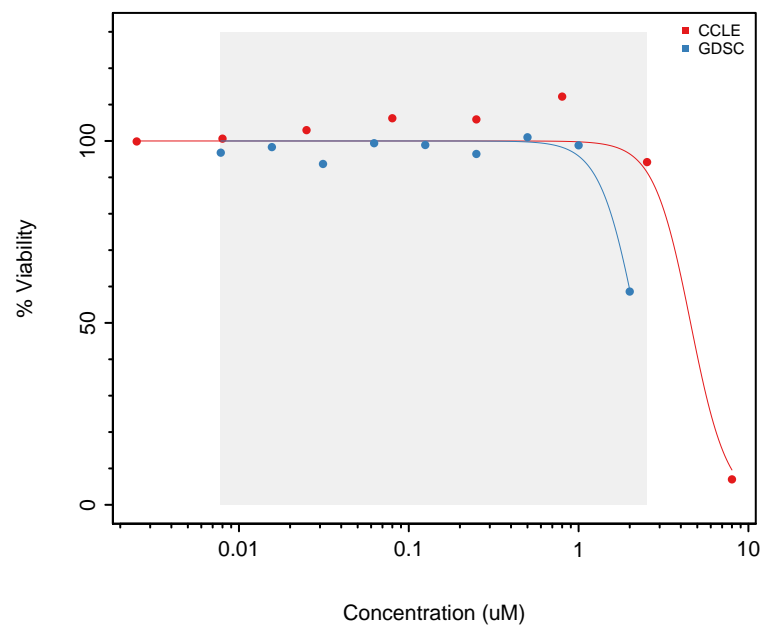

Crizotinib:BT-474

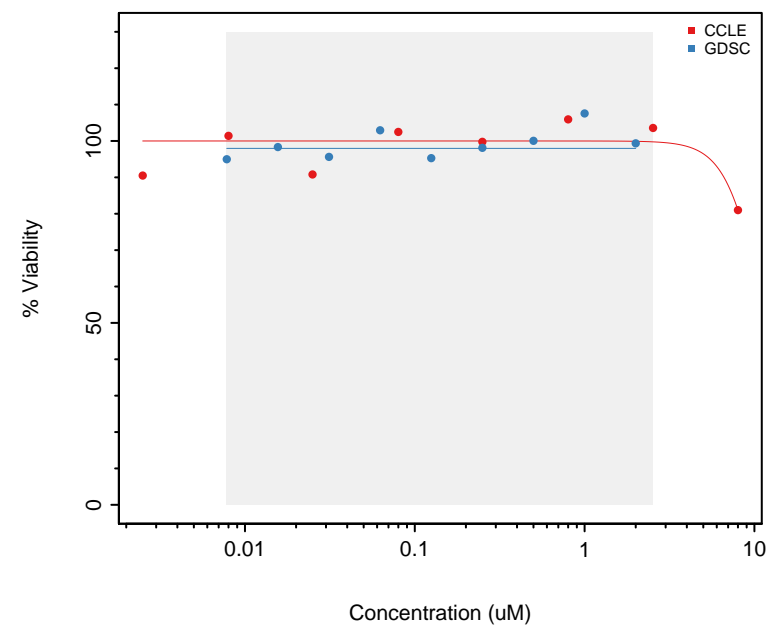

Crizotinib:C2BBe1

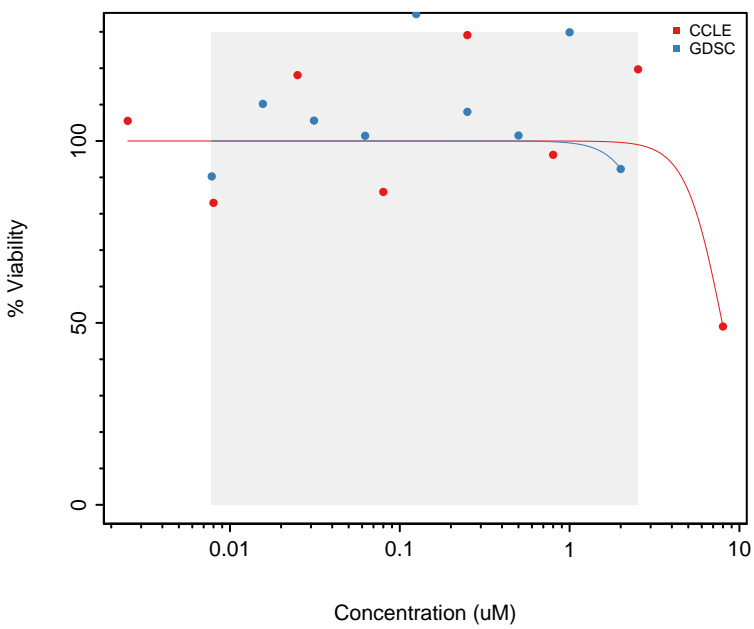

Crizotinib:Calu-6

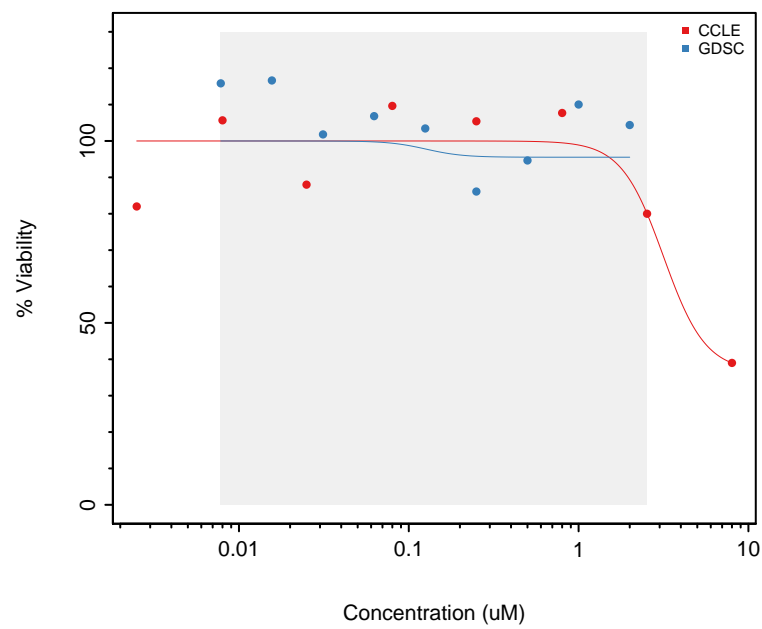

Crizotinib:CAS-1

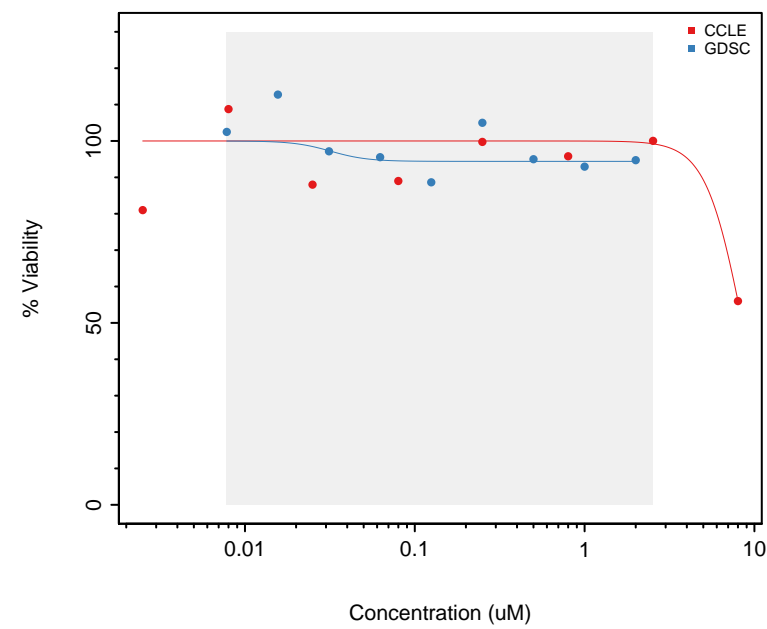

Crizotinib:COLO-320-HSR

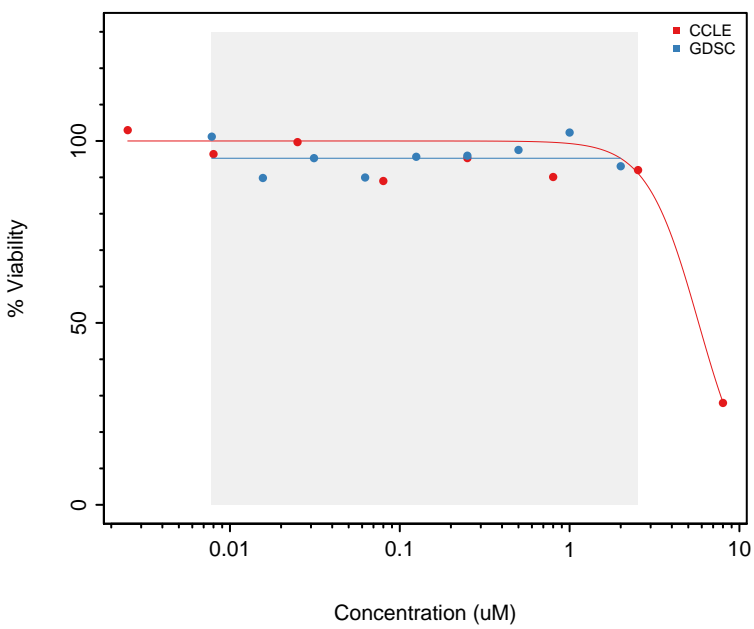

Crizotinib:DEL

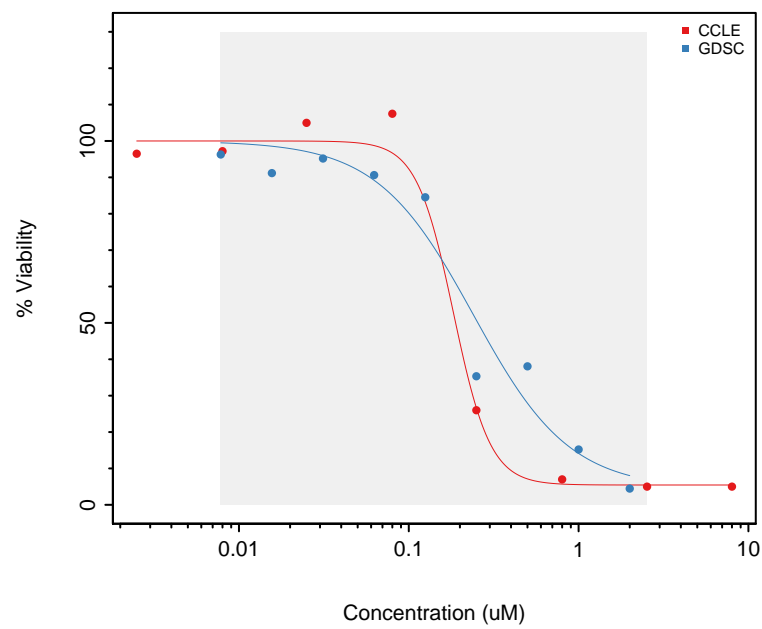

Crizotinib:DMS-114

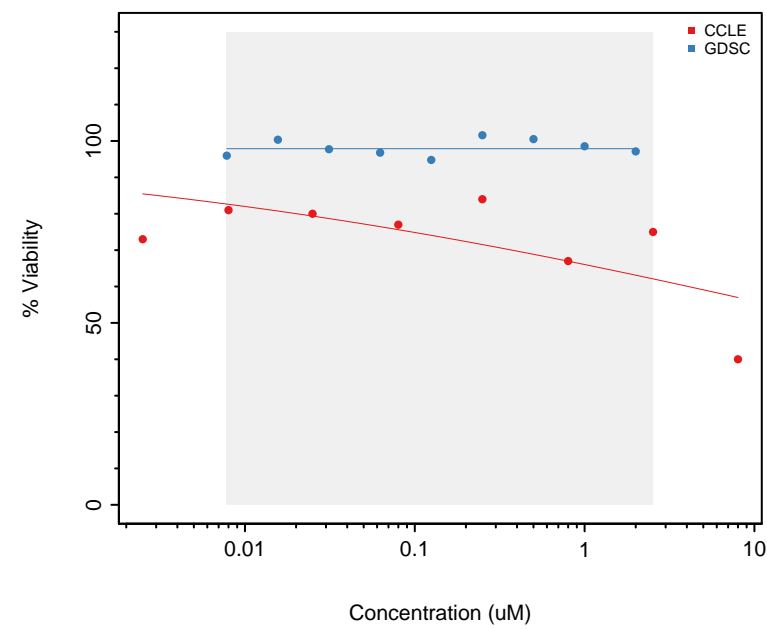

Crizotinib:DOHH-2

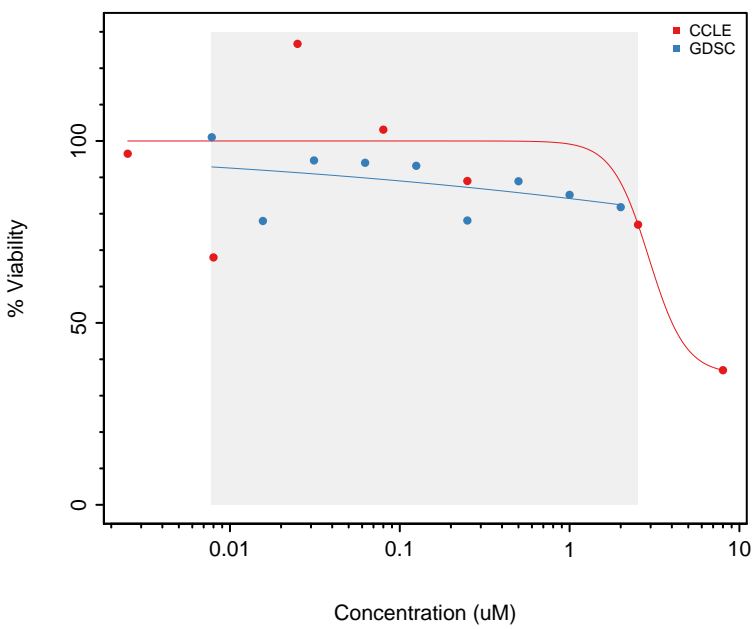

Crizotinib:EB2

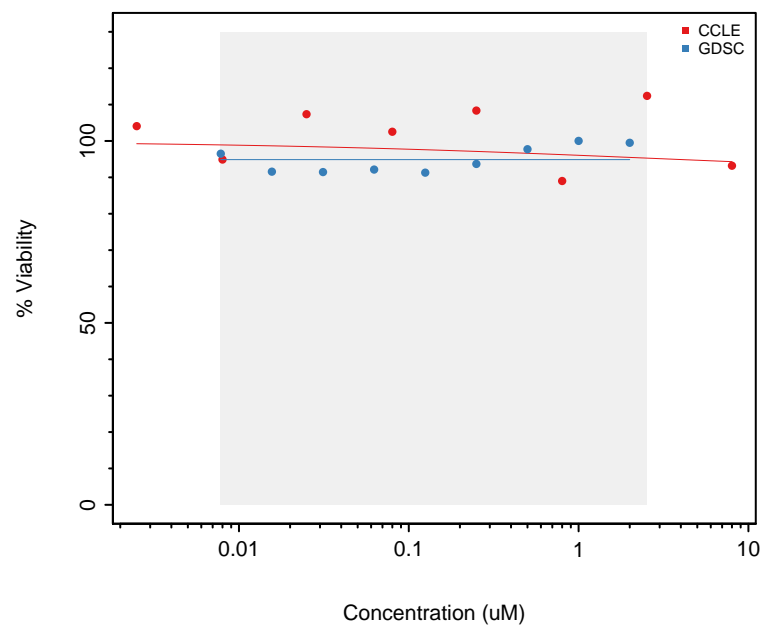

Crizotinib:EM-2

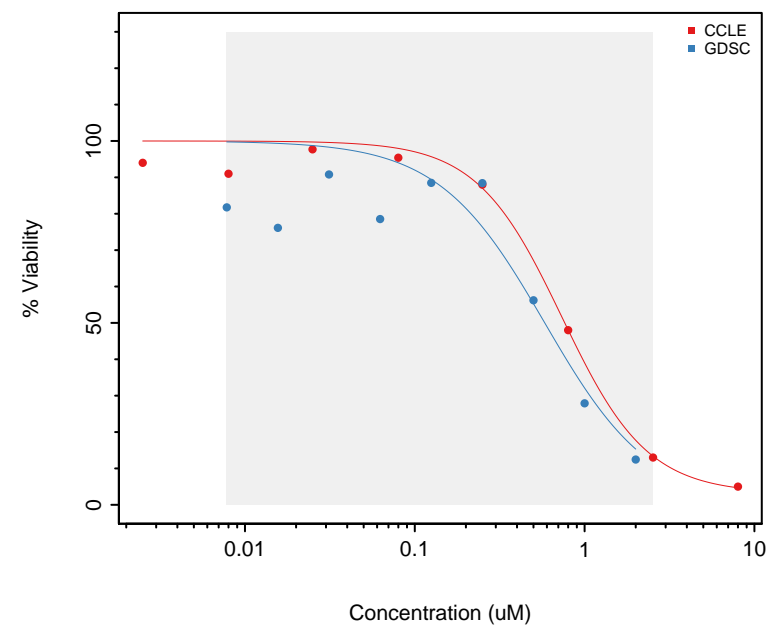

Crizotinib:GB-1

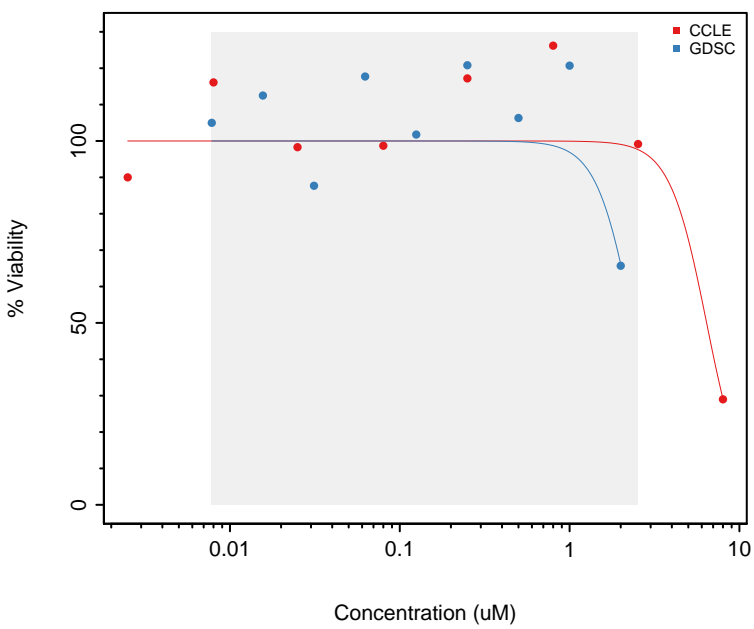

Crizotinib:GCIY

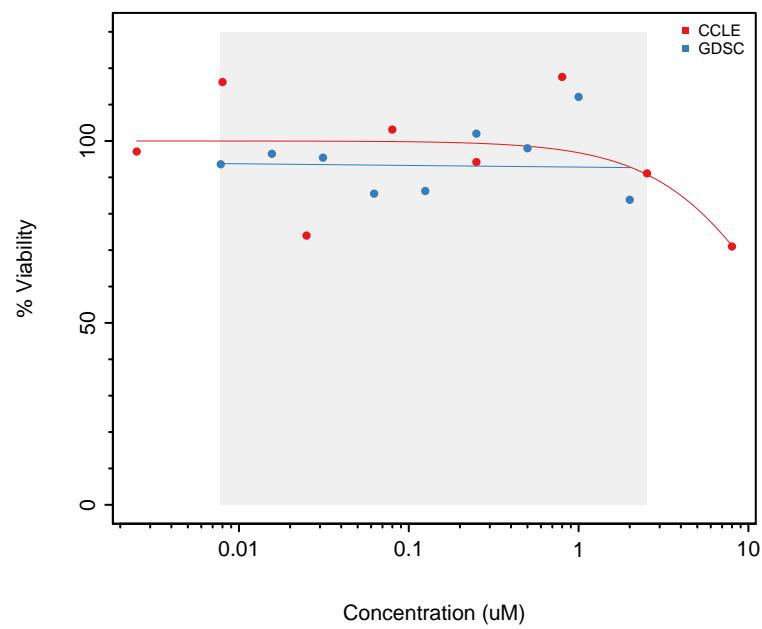

Crizotinib:GI-1

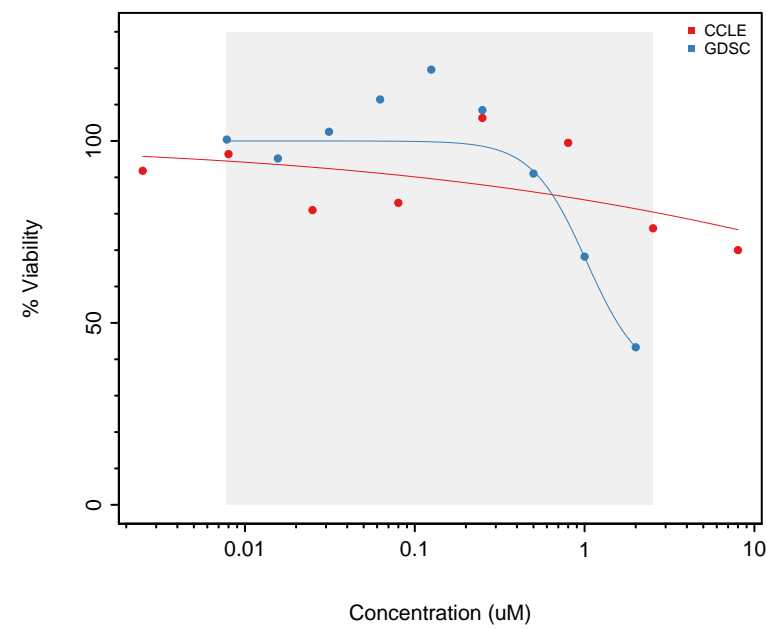

Crizotinib:HCC1187

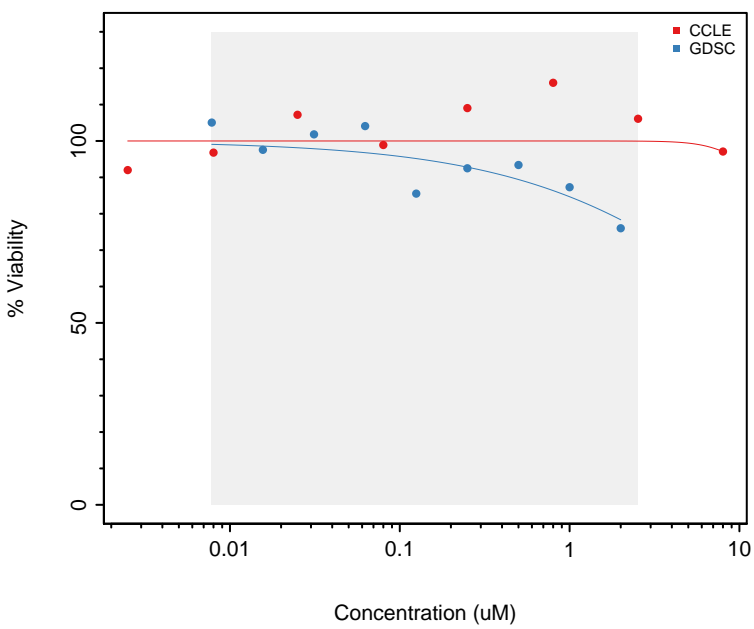

Crizotinib:HD-MY-Z

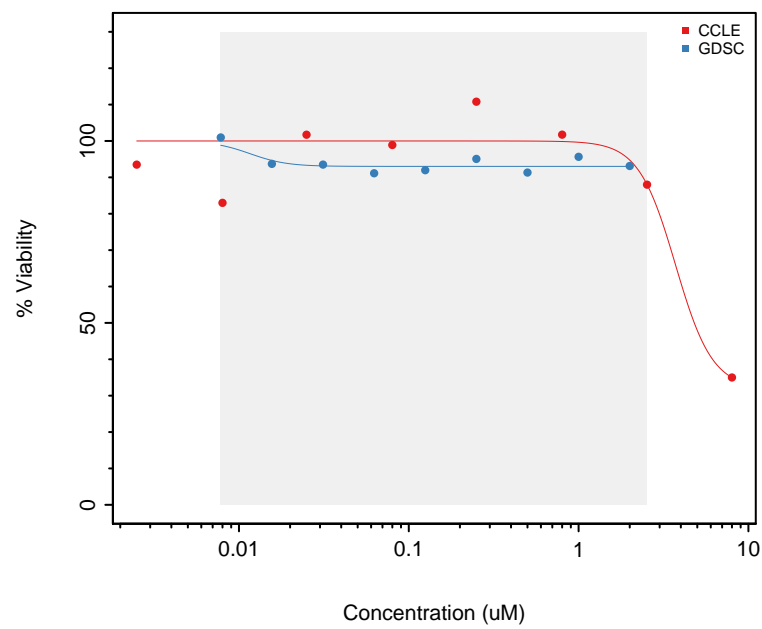

Crizotinib:HH

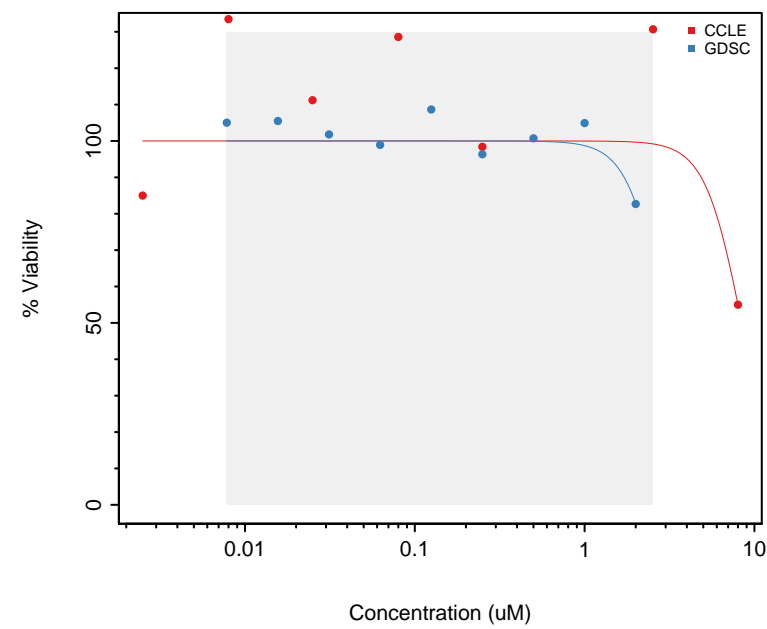

Crizotinib:HT

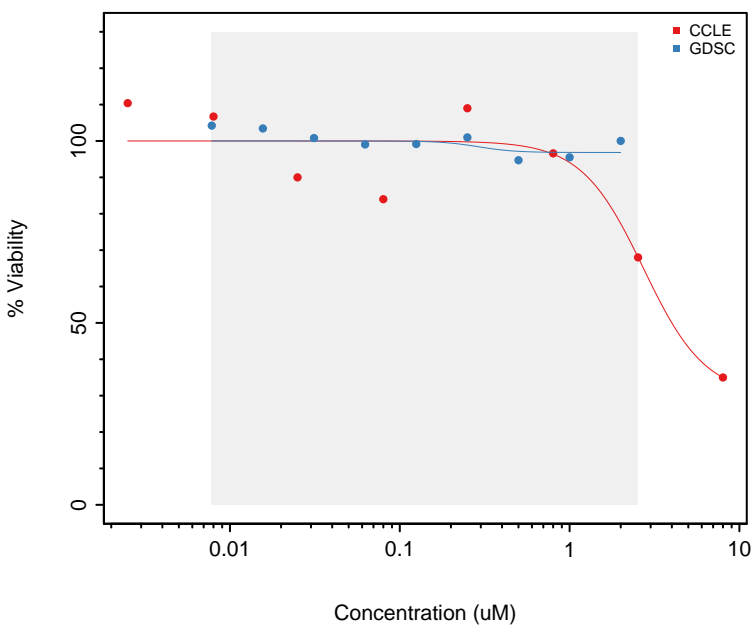

Crizotinib:HT-144

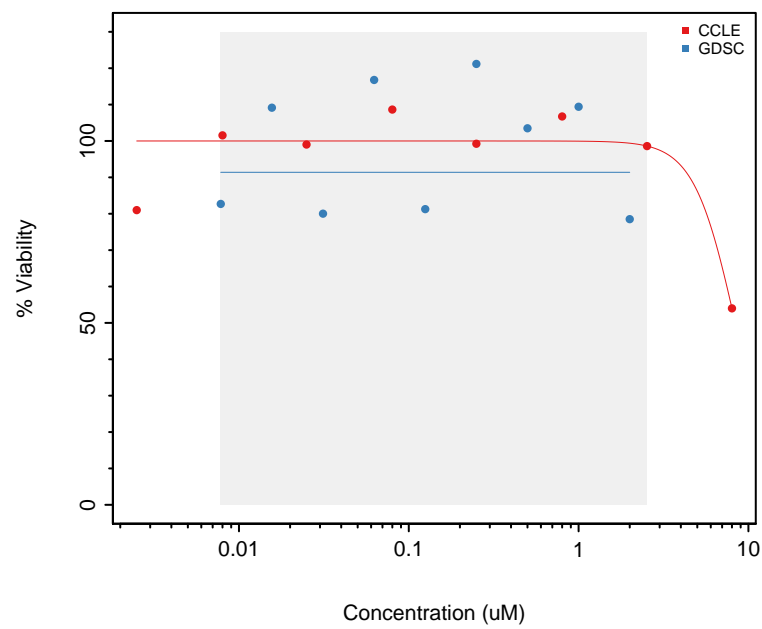

Crizotinib:IA-LM

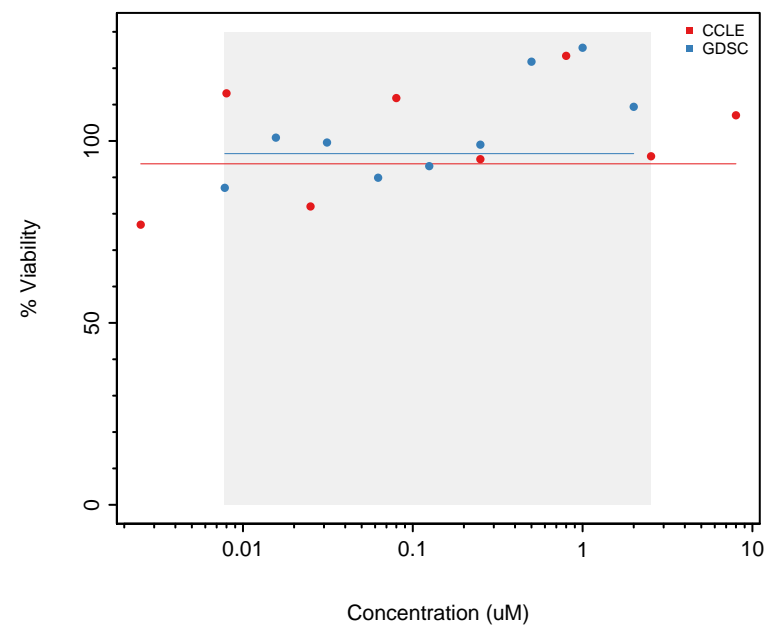

Crizotinib:IST-MES1

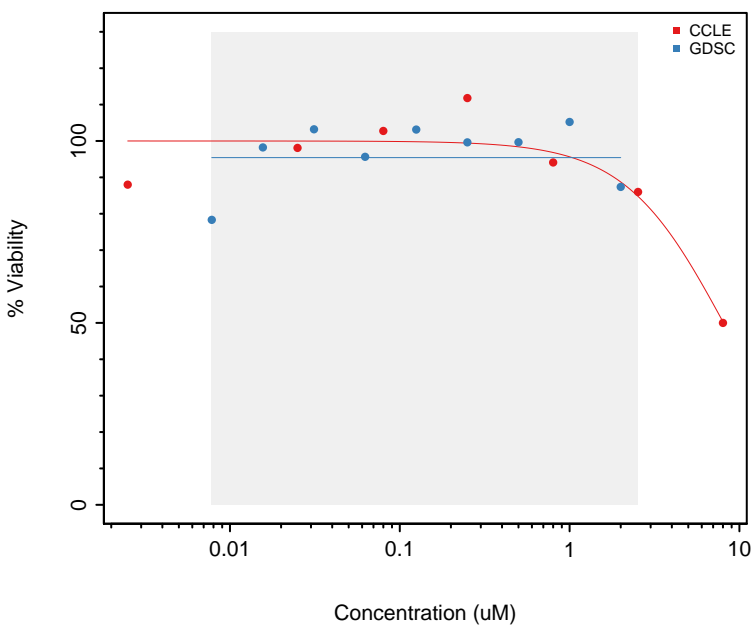

Crizotinib:JVM-3

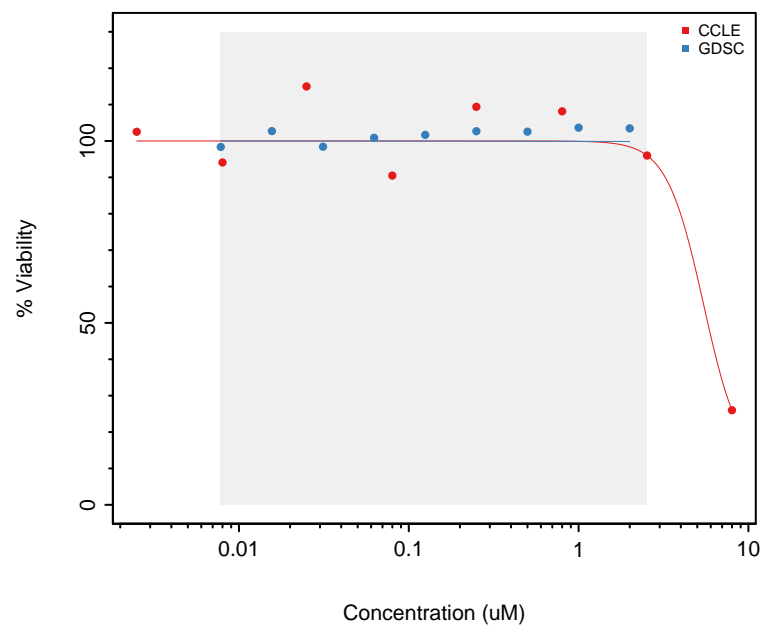

Crizotinib:KALS-1

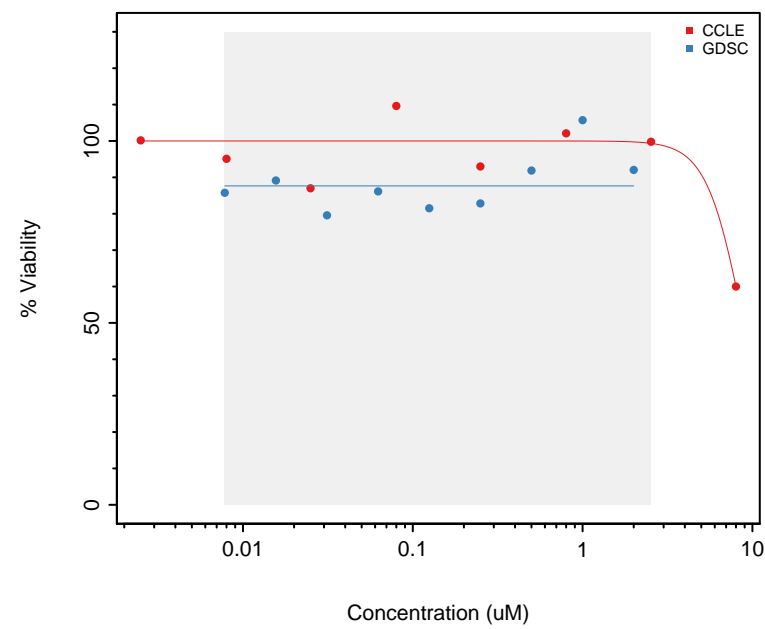

Crizotinib:KARPAS-299

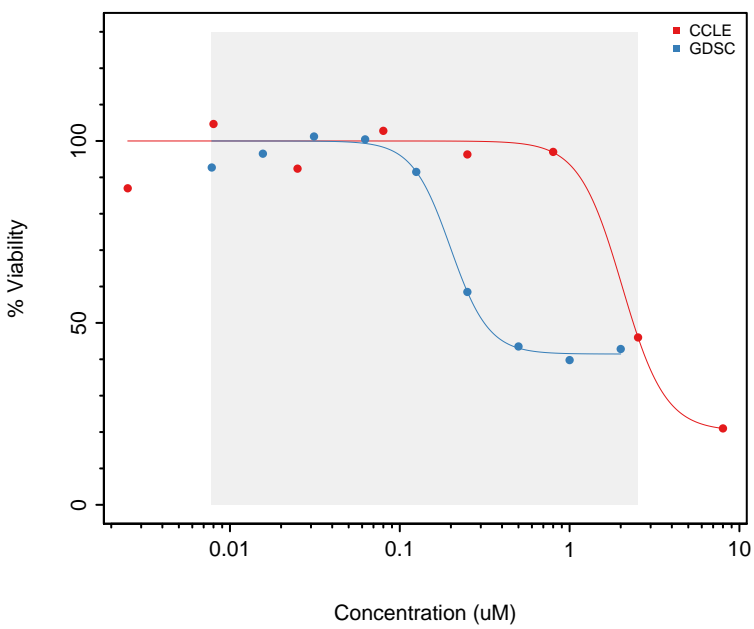

Crizotinib:KARPAS-422

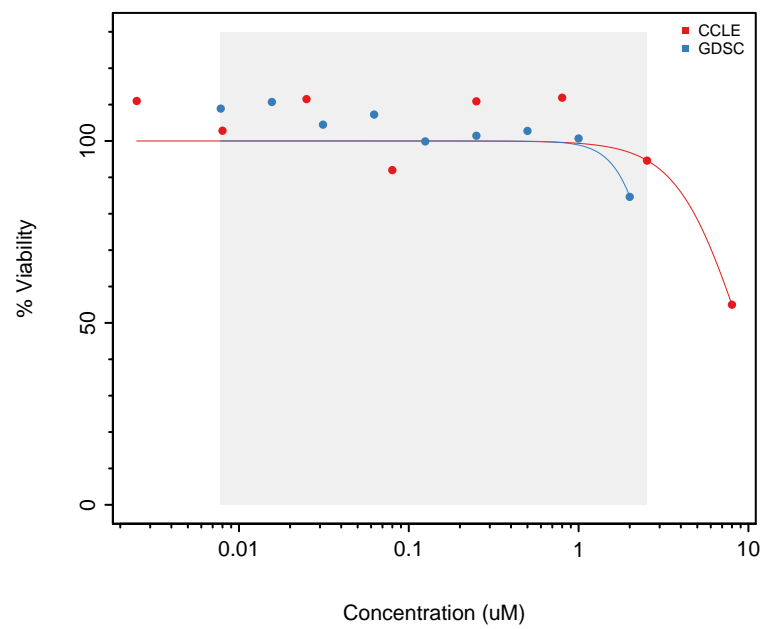

Crizotinib:KG-1

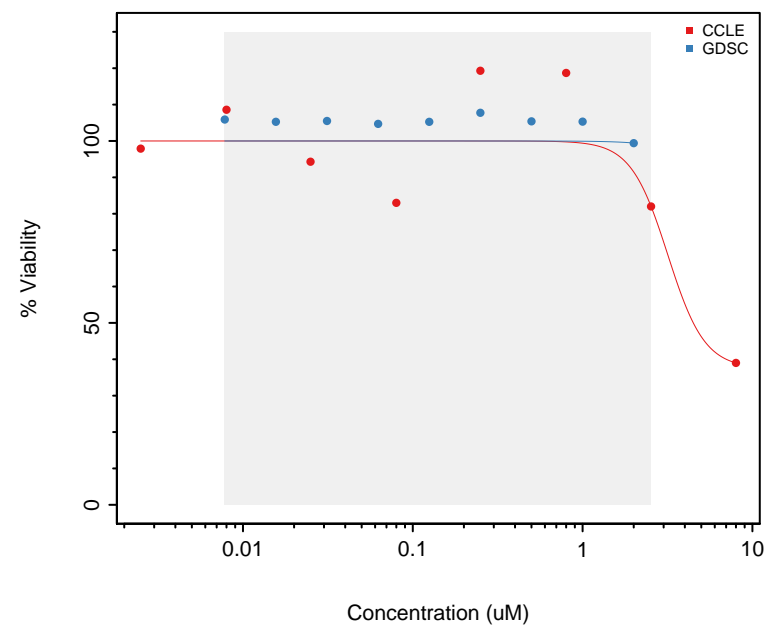

Crizotinib:KLE

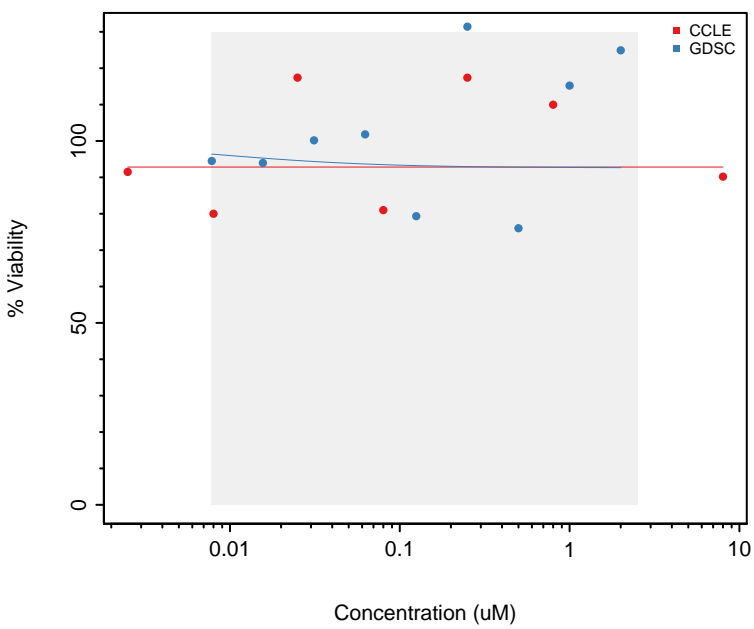

Crizotinib:KNS-42

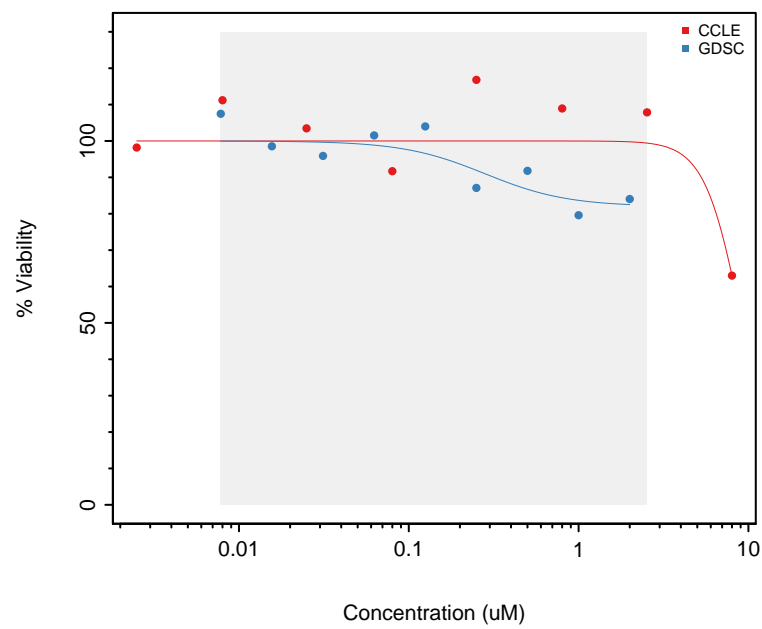

Crizotinib:KNS-81-FD

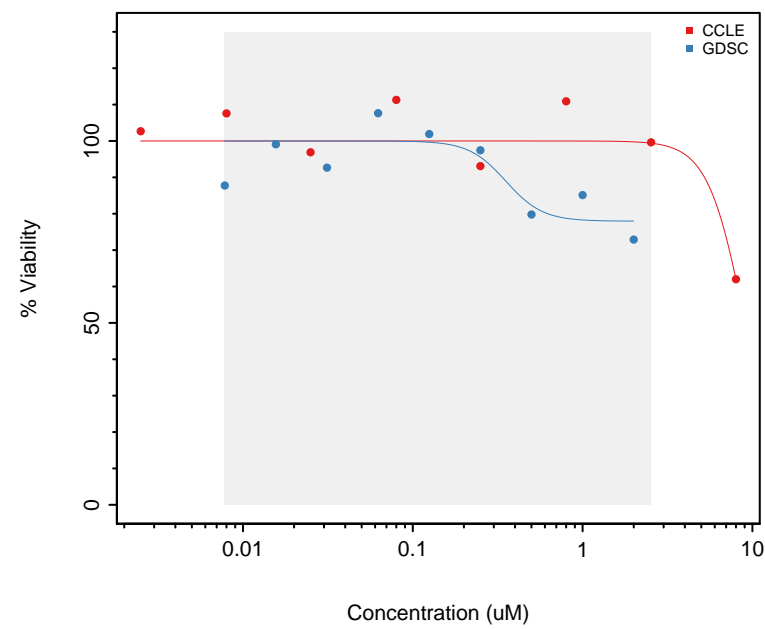



Crizotinib:MSTO-211H

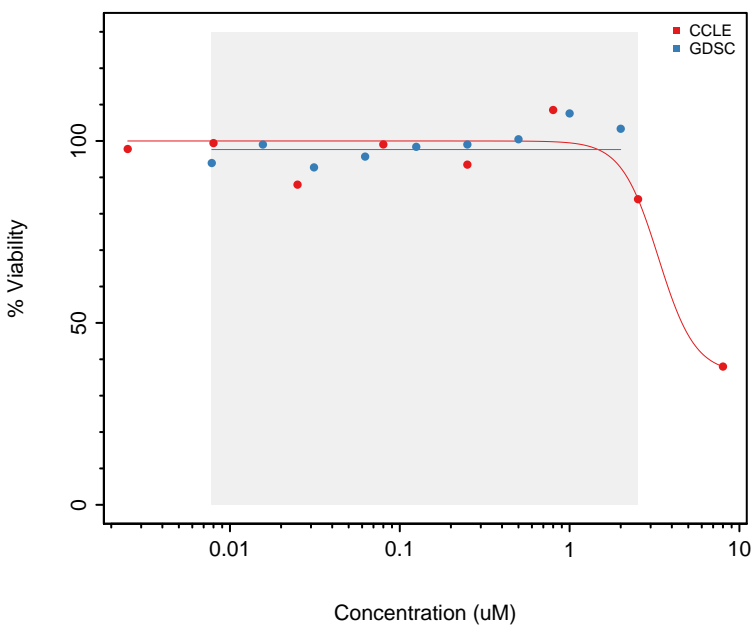

Crizotinib:NCI-H1092

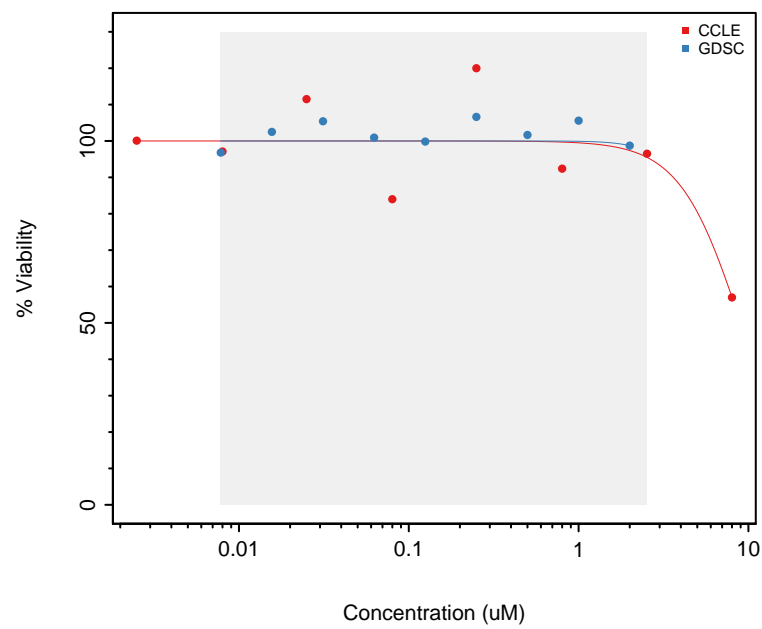

Crizotinib:NCI-H1155

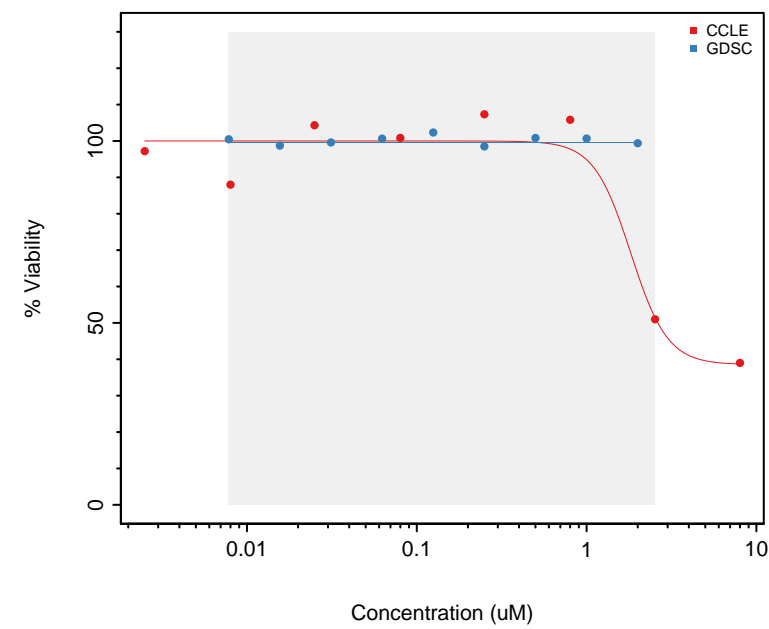

Crizotinib:NCI-H1299

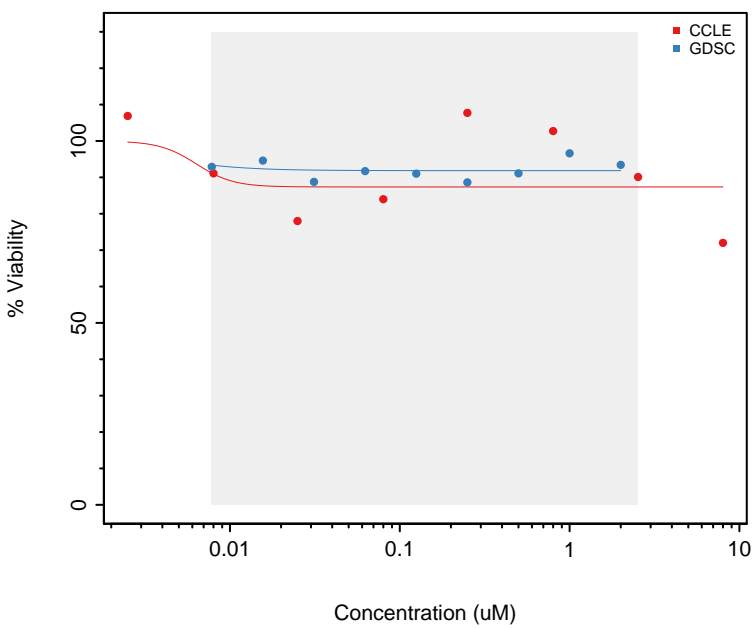

Crizotinib:NCI-H1355

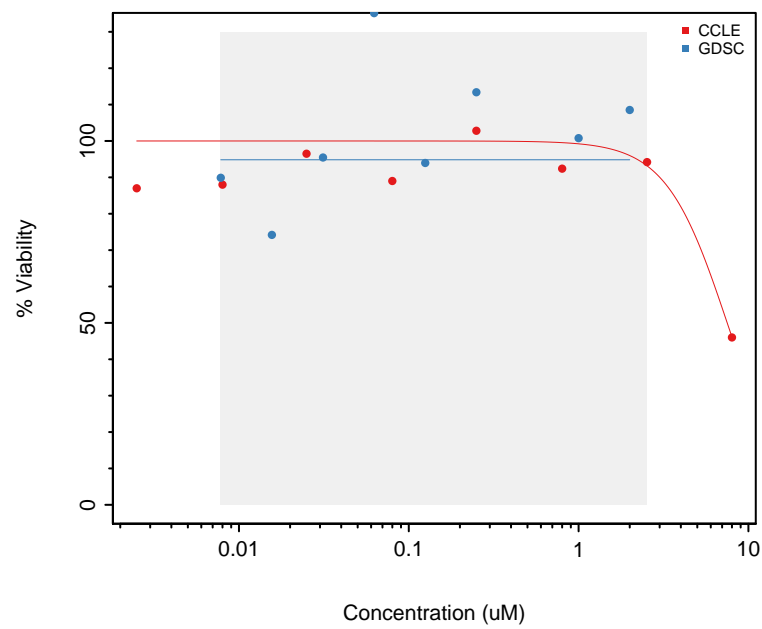

Crizotinib:NCI-H1581

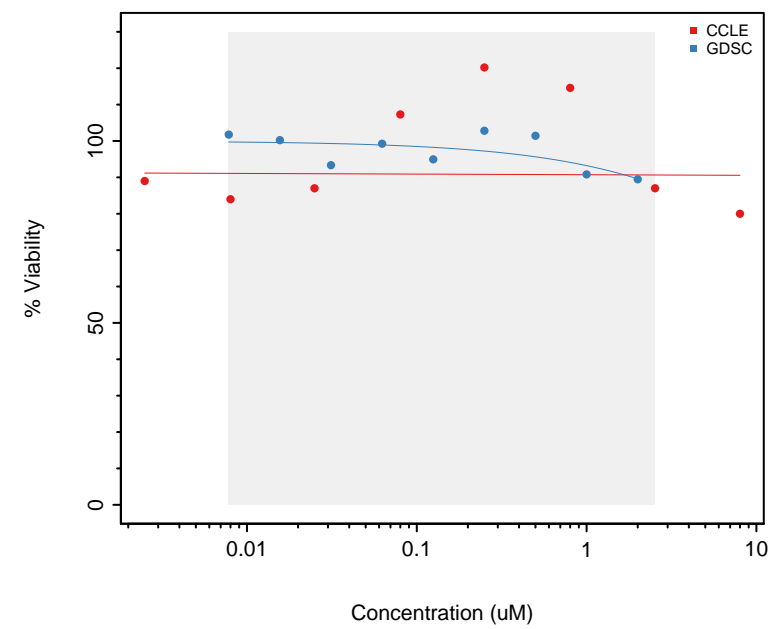

Crizotinib:NCI-H1648

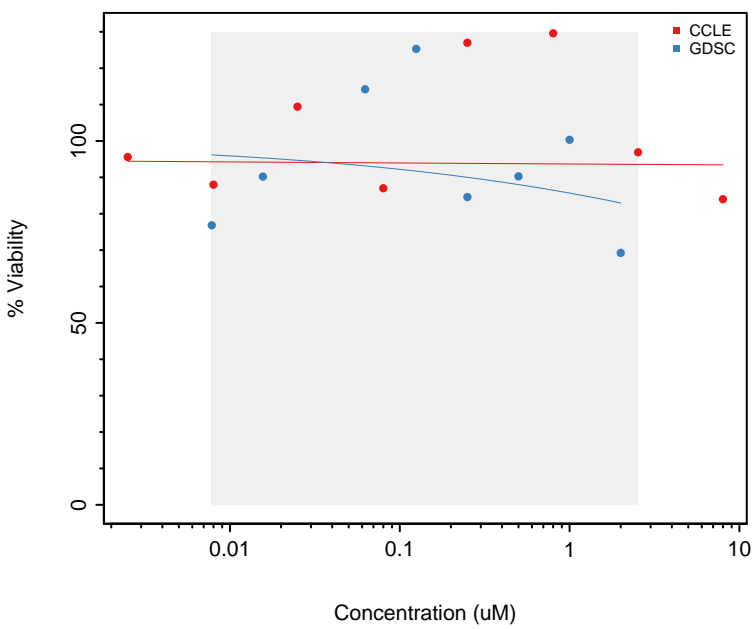

Crizotinib:NCI-H1666

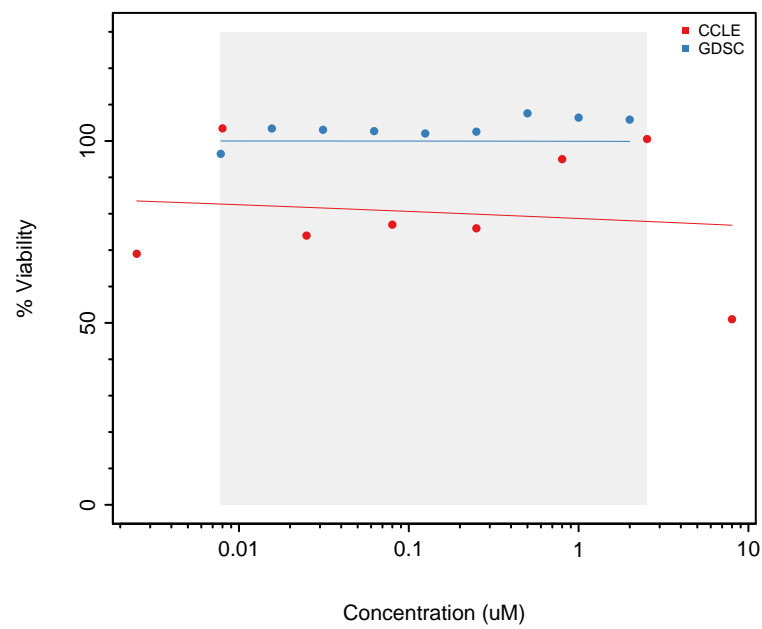

Crizotinib:NCI-H1694

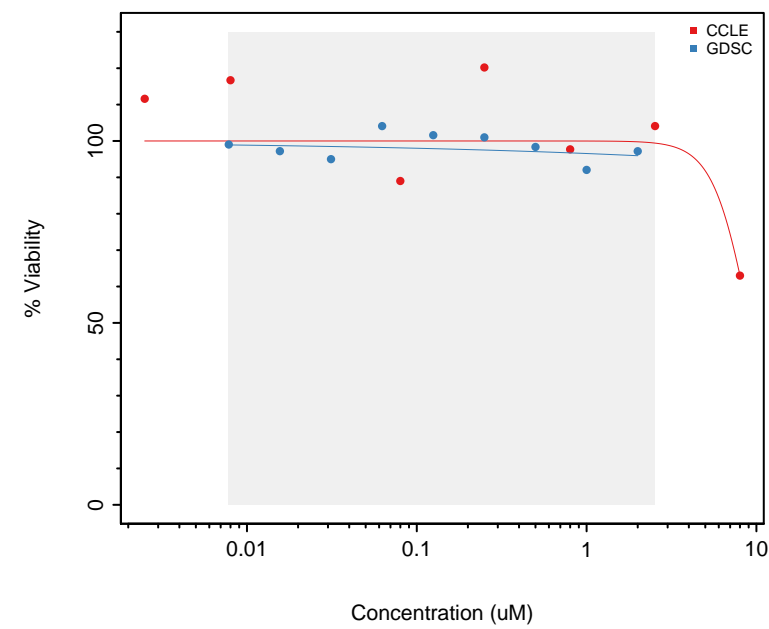

Crizotinib:NCI-H1975

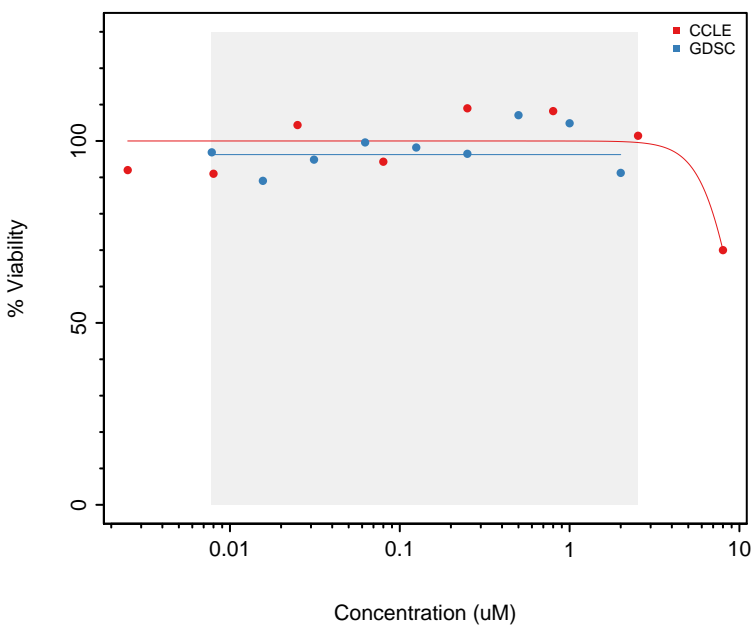

Crizotinib:NCI-H226

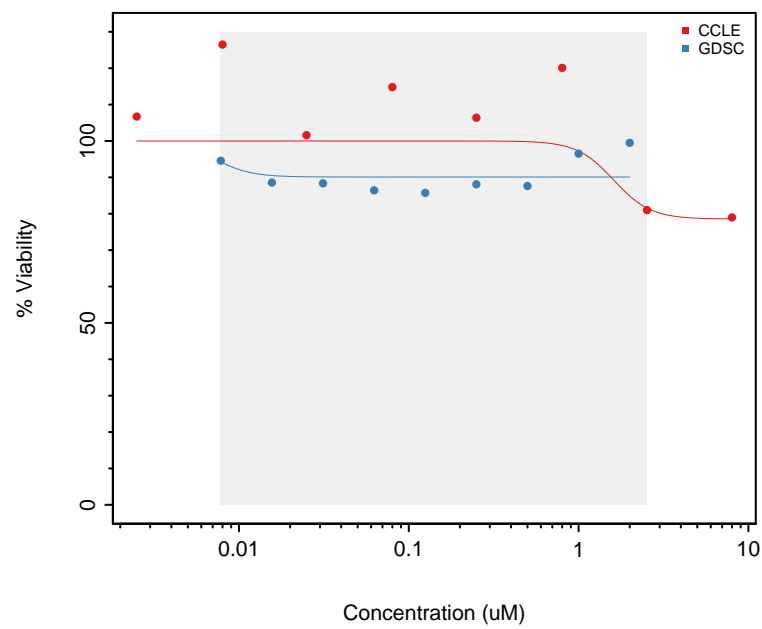

Crizotinib:NCI-H23

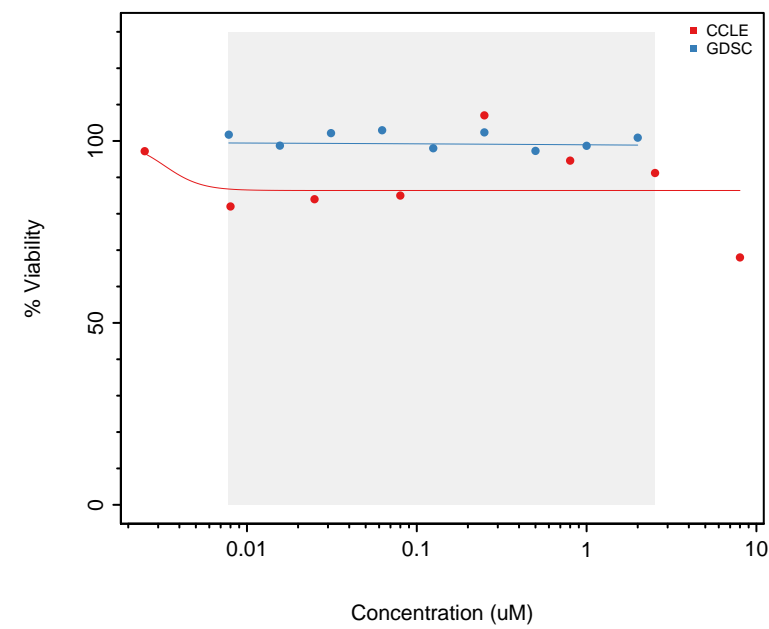







Crizotinib:SNU-C2B

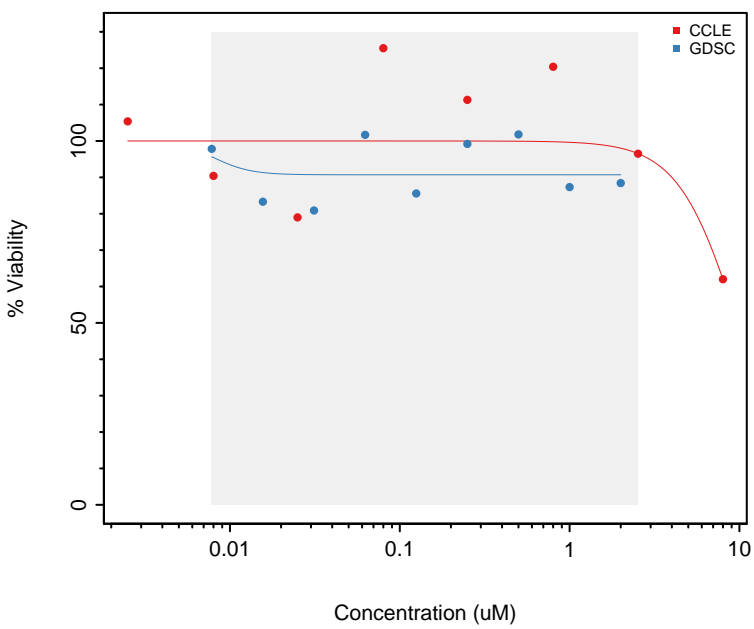

Crizotinib:SUP-T1

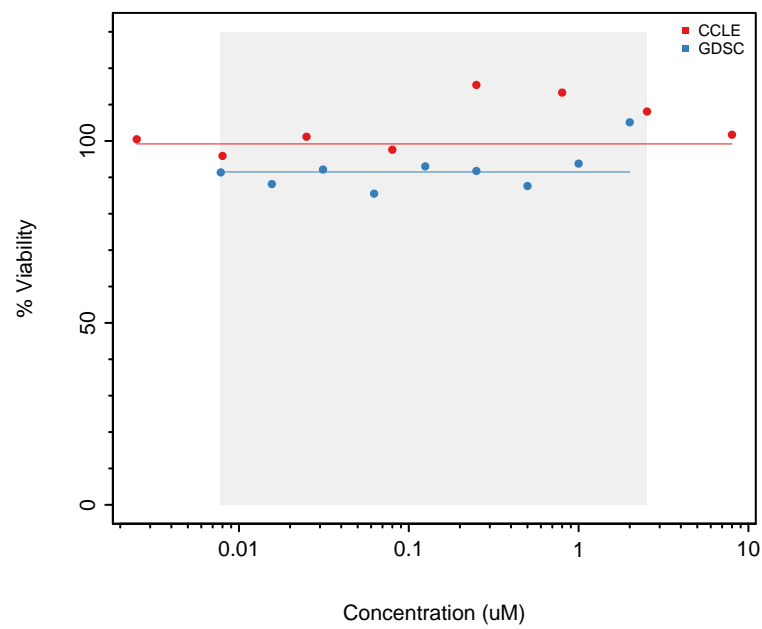

Crizotinib:TE-1

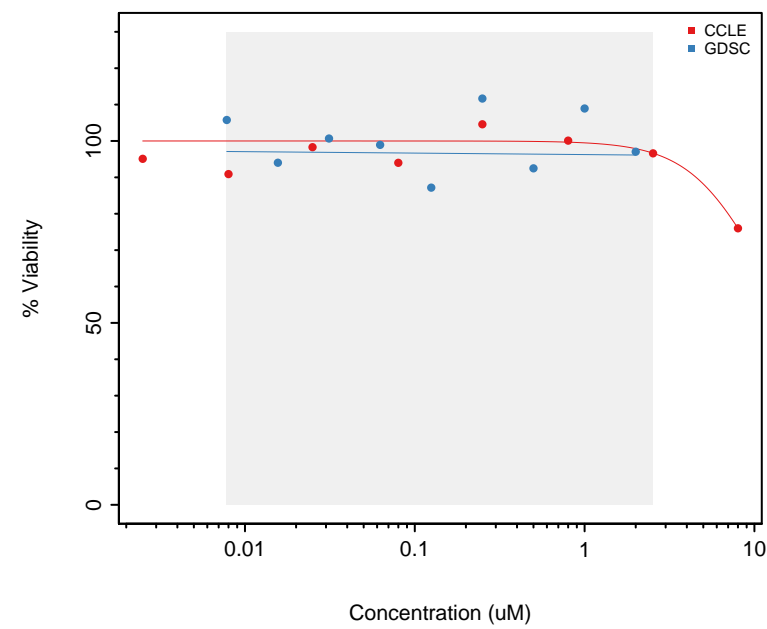

Crizotinib:TE-11

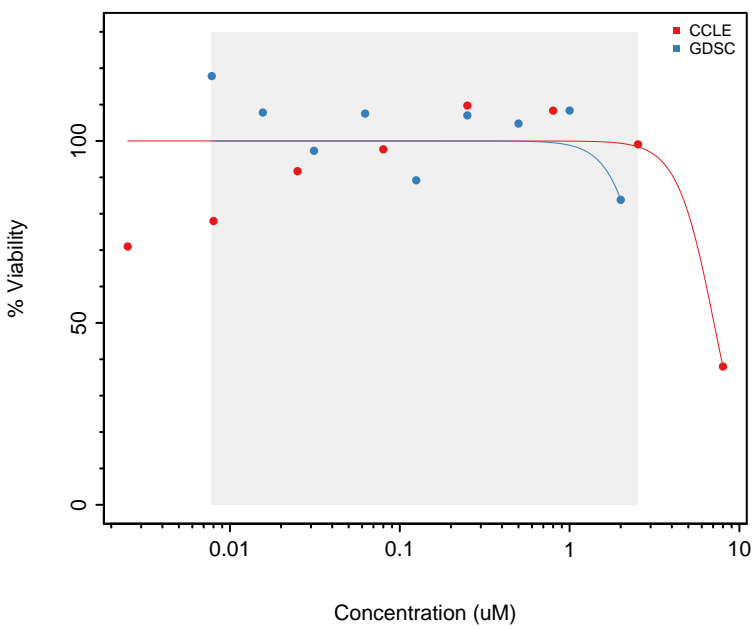

Crizotinib:TE-15

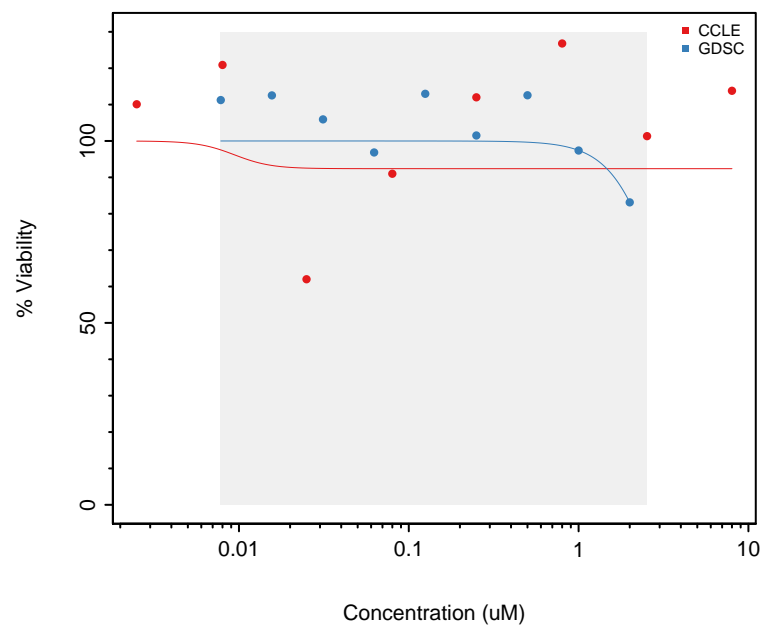

Crizotinib:TE-5

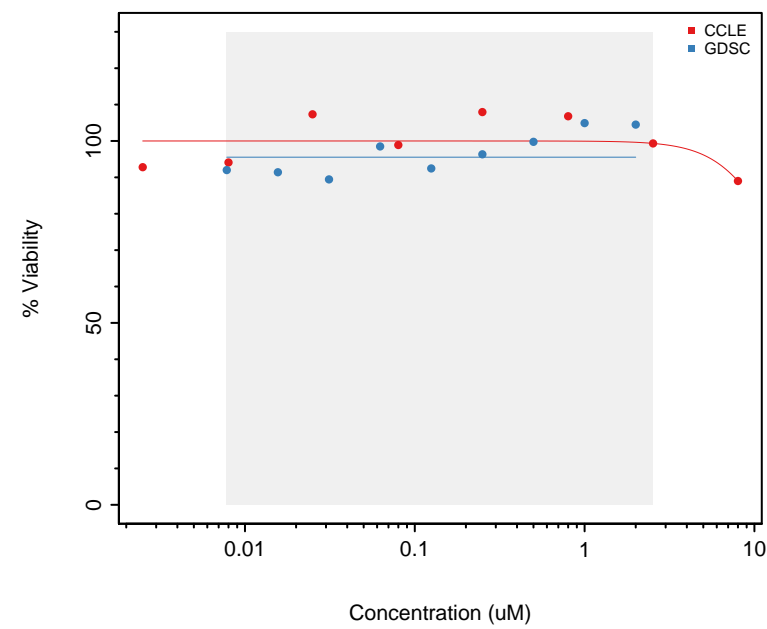

Crizotinib:TE-9

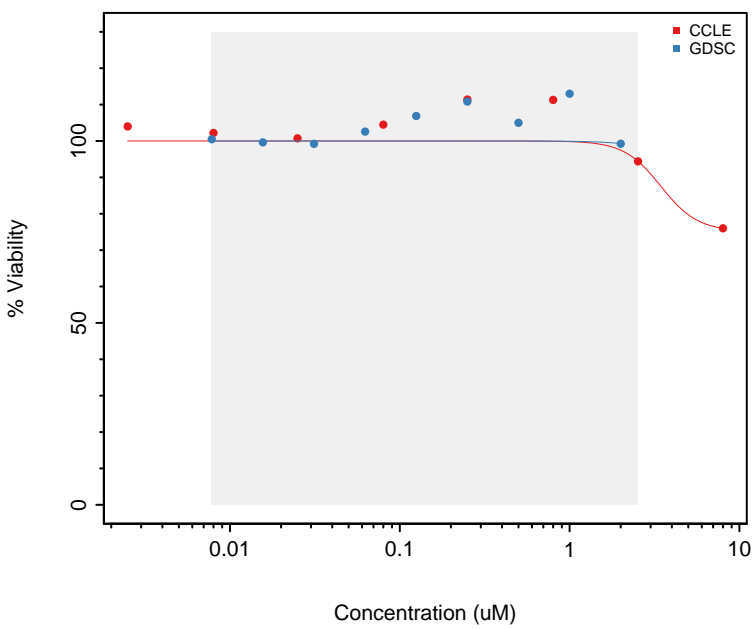

Crizotinib:U-87-MG

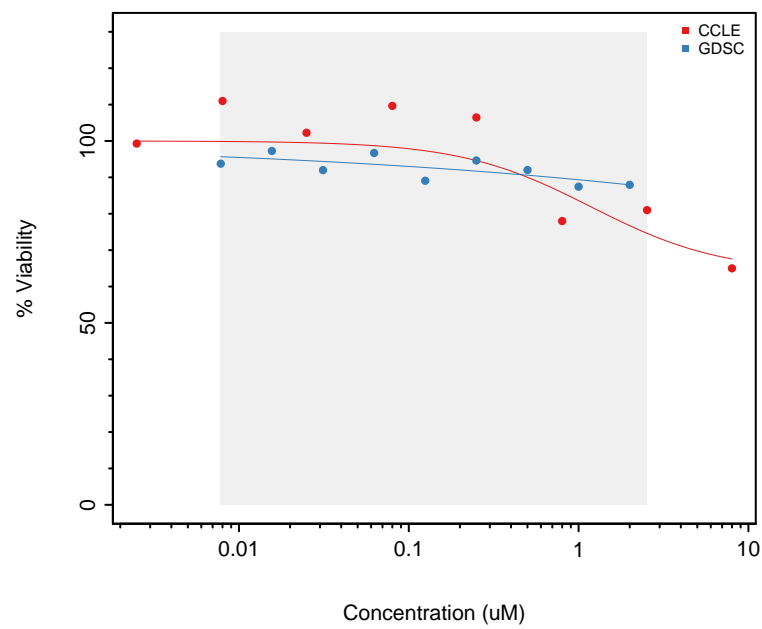

Crizotinib:UACC-257

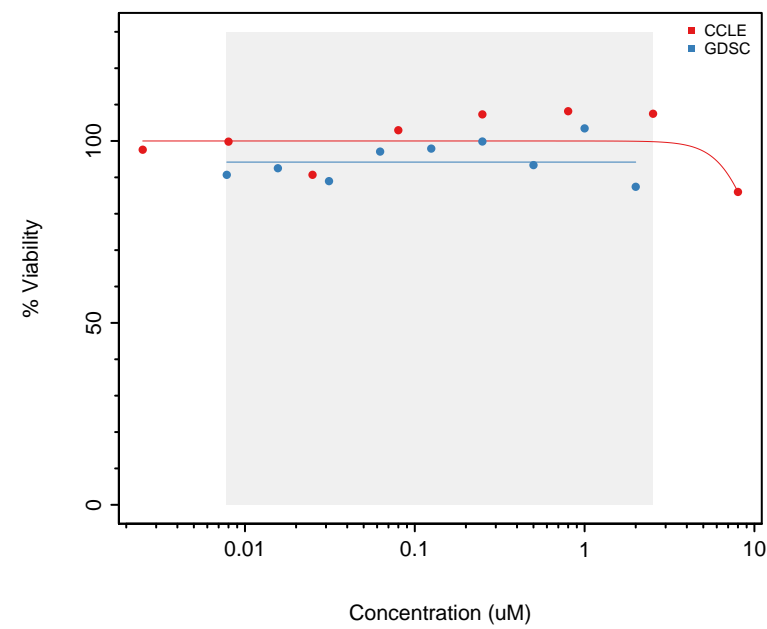

Crizotinib:UACC-812

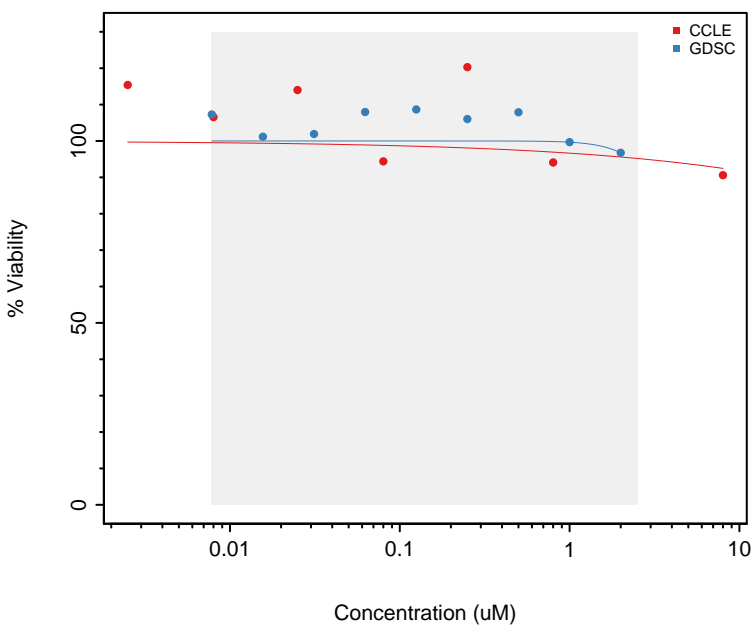

Sorafenib:697

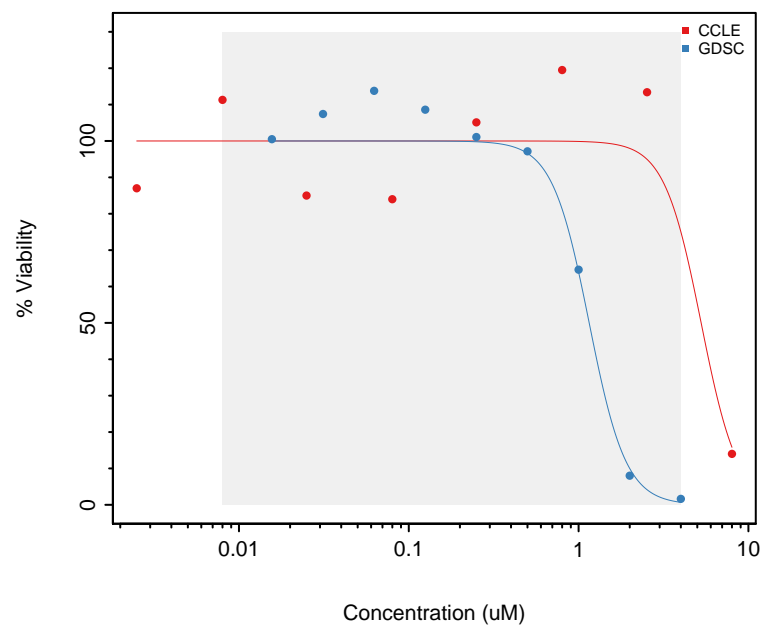

Sorafenib:8-MG-BA

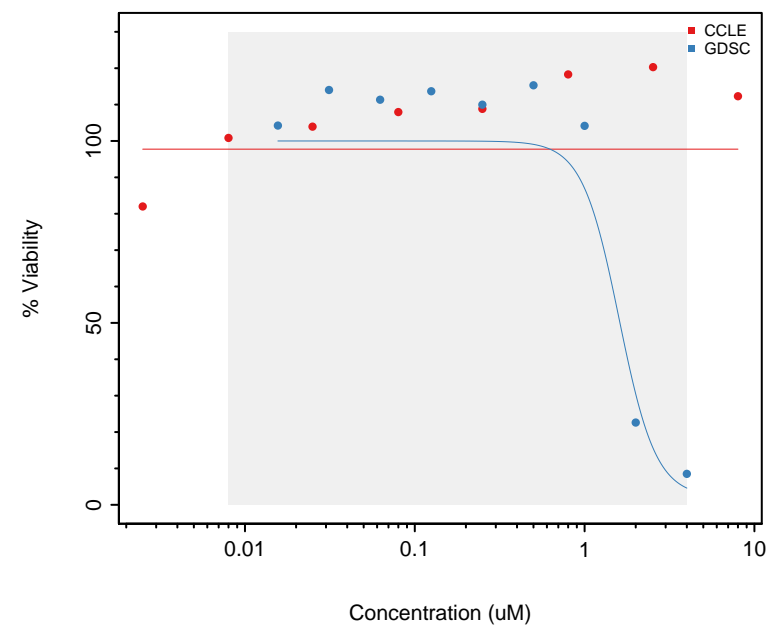





Sorafenib:KARPAS-299

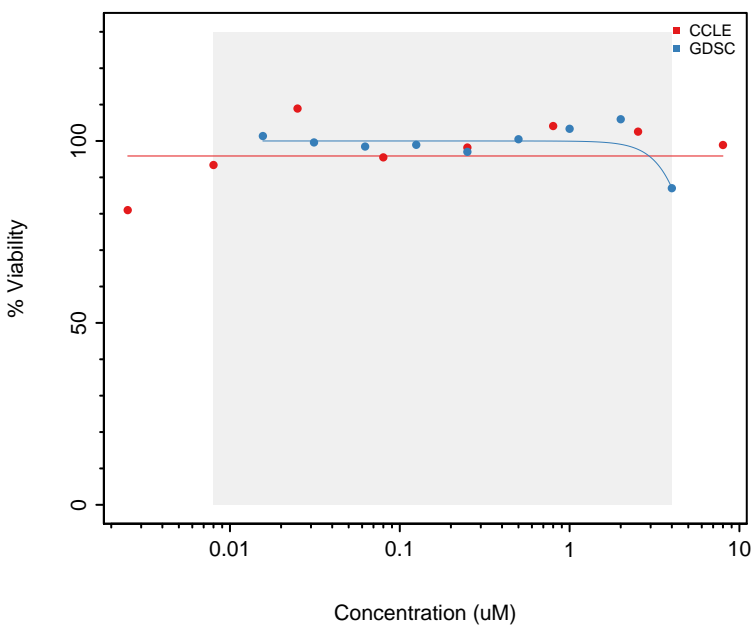

Sorafenib:KARPAS-422

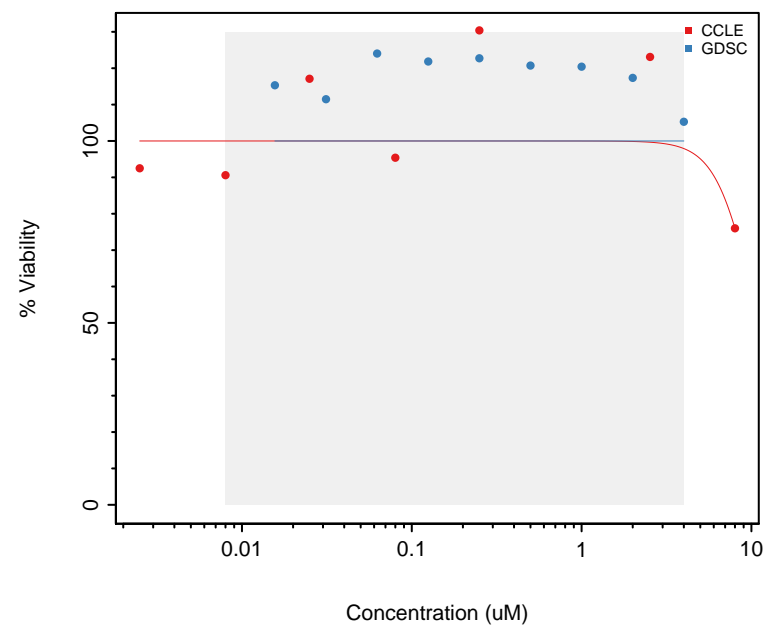

Sorafenib:KG-1

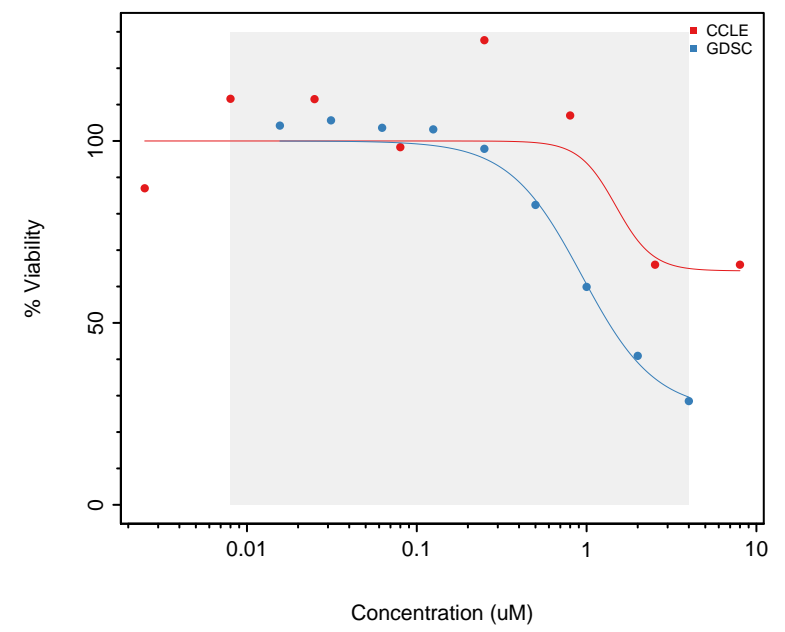

Sorafenib:KNS-81-FD

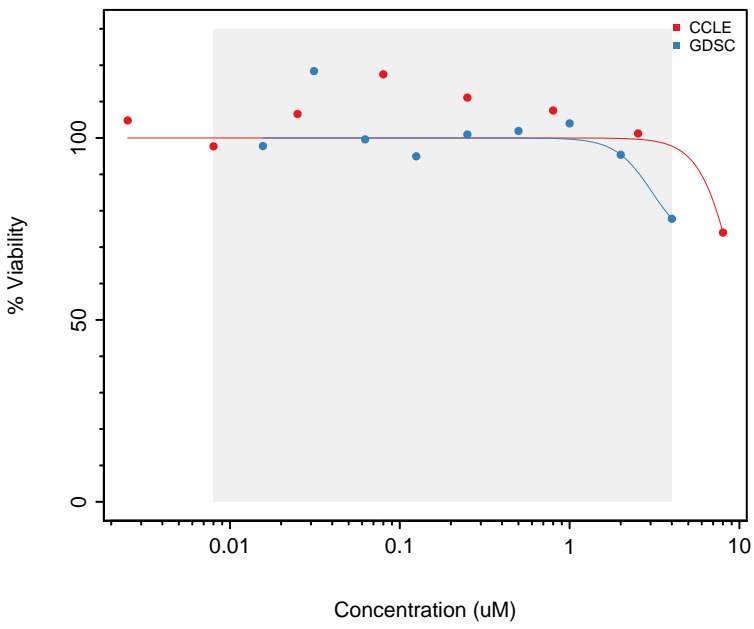

Sorafenib:K052

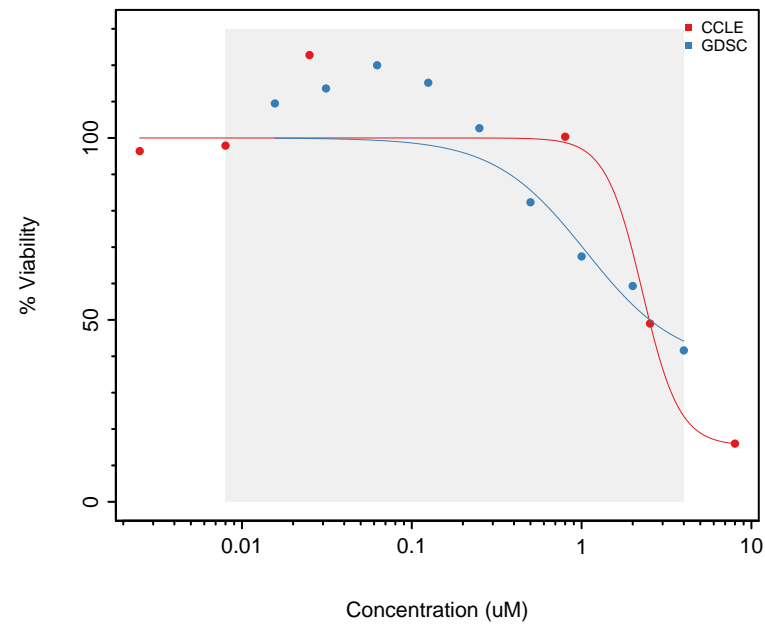

Sorafenib:KU812

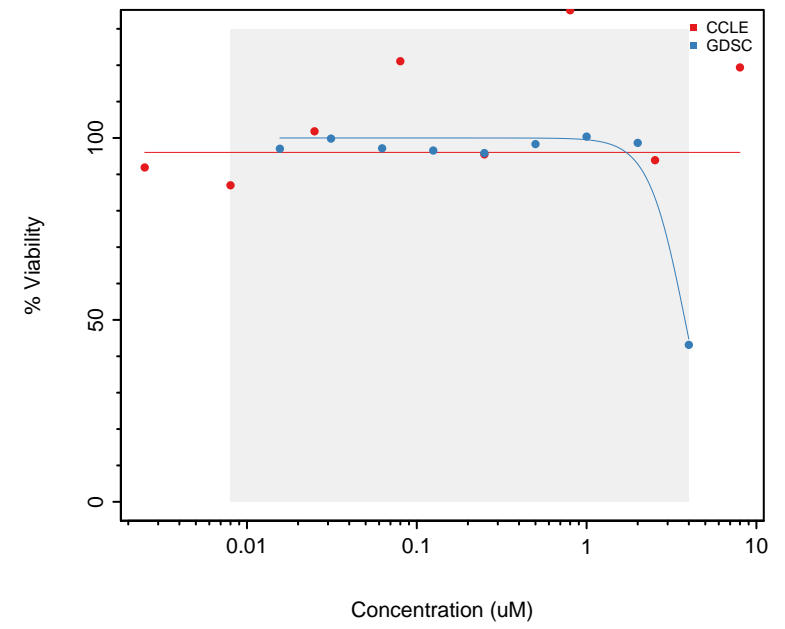

Sorafenib:KURAMOCHI

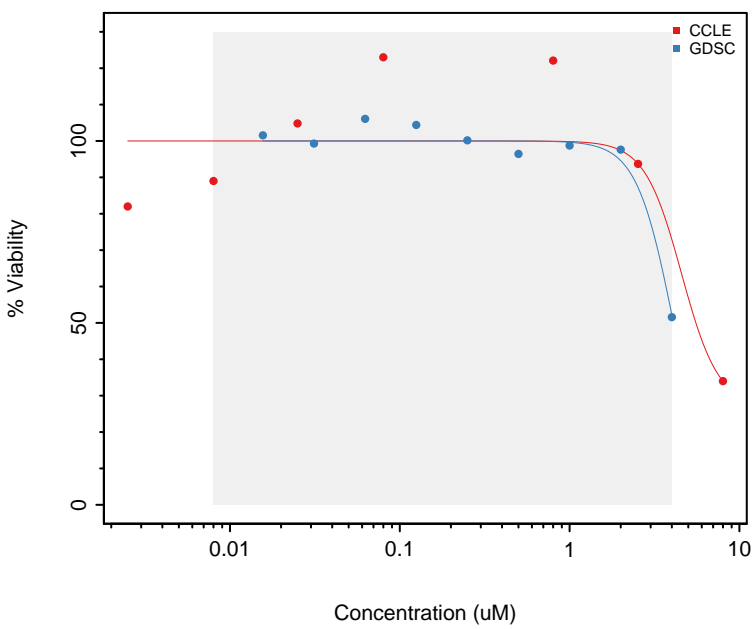

Sorafenib:L-363

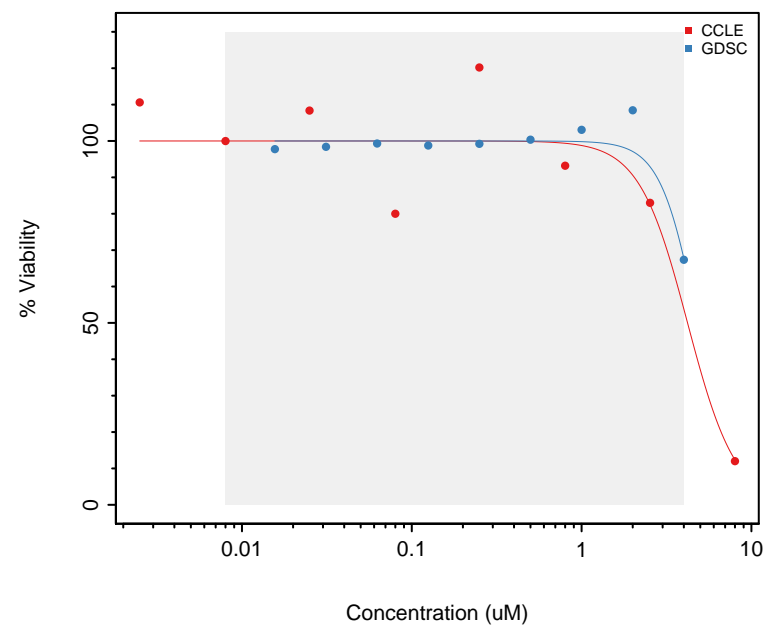

Sorafenib:L-428

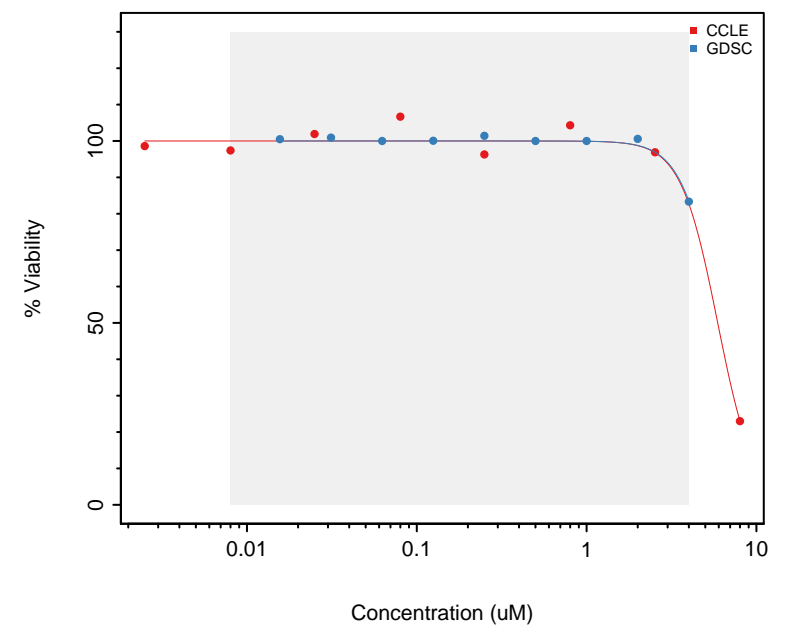

Sorafenib:LOXIMVI

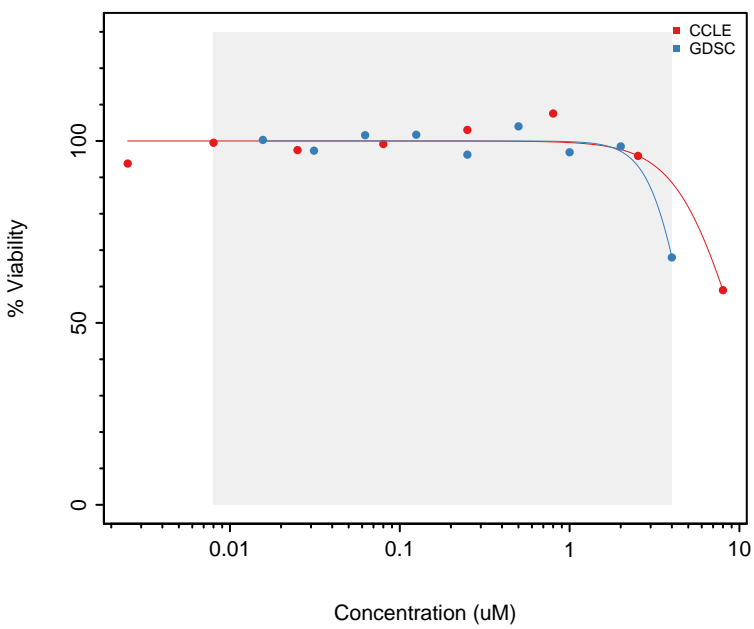

Sorafenib:LP-1

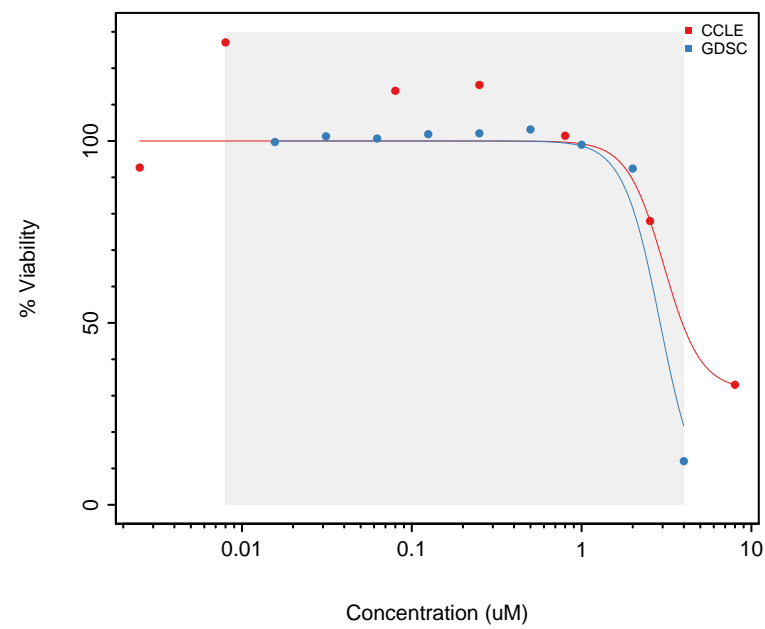

Sorafenib:LS-123

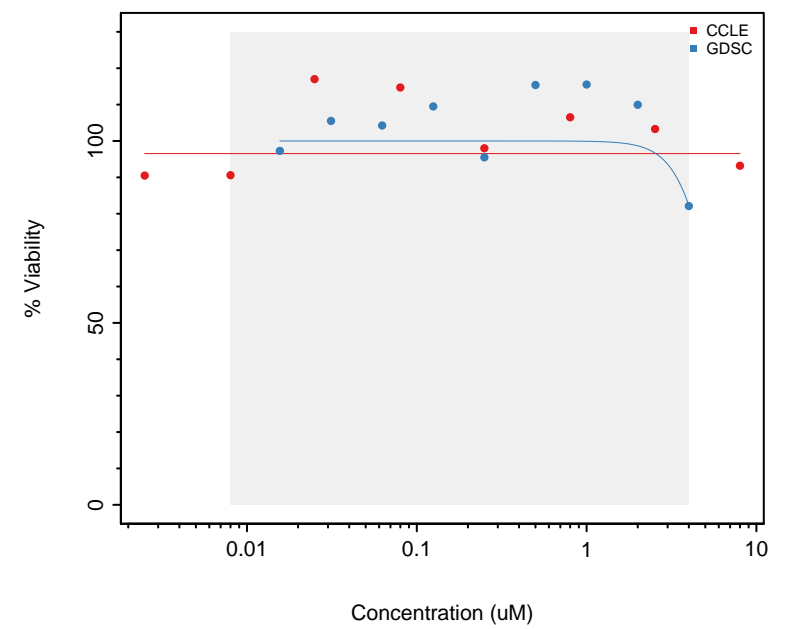







Sorafenib:REH

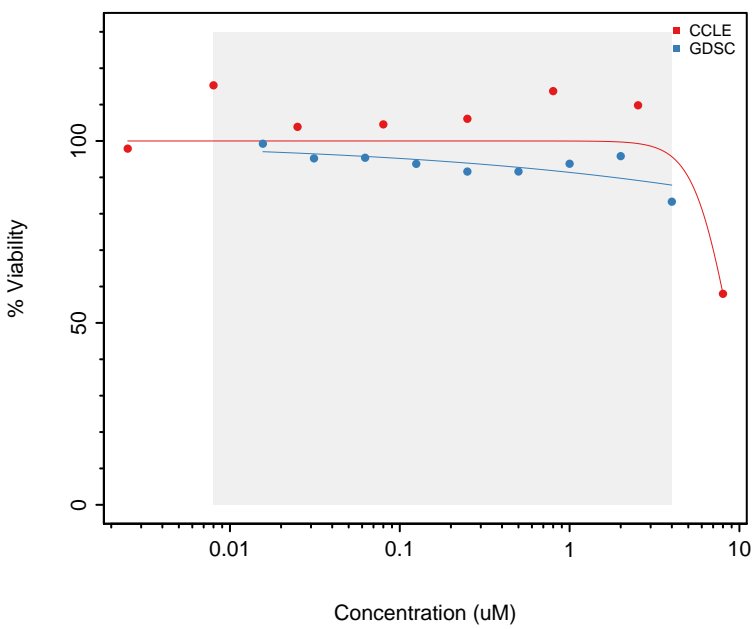

Sorafenib:RKO

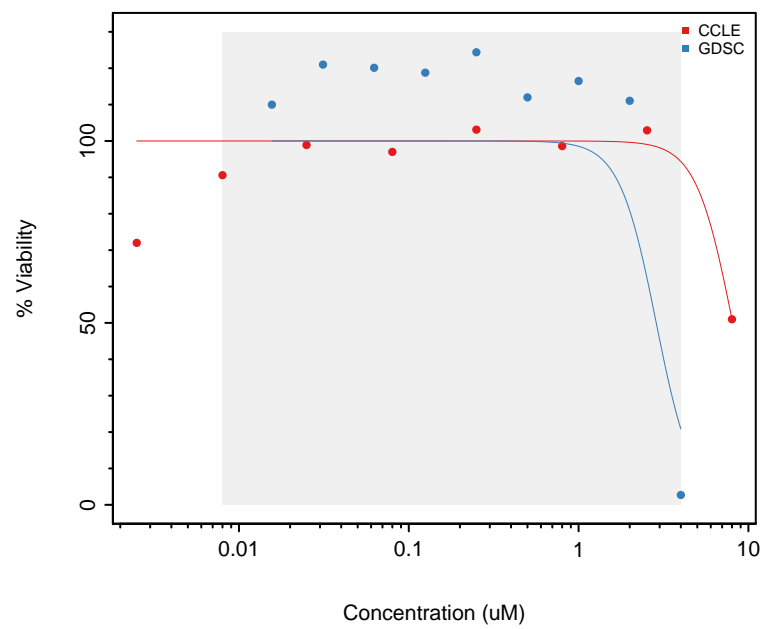

Sorafenib:RL95-2

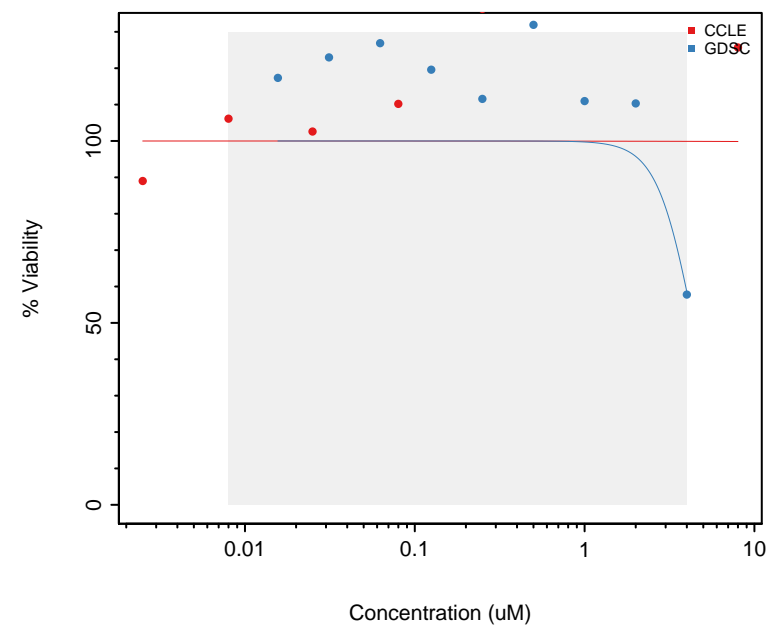

Sorafenib:RPMI-8402

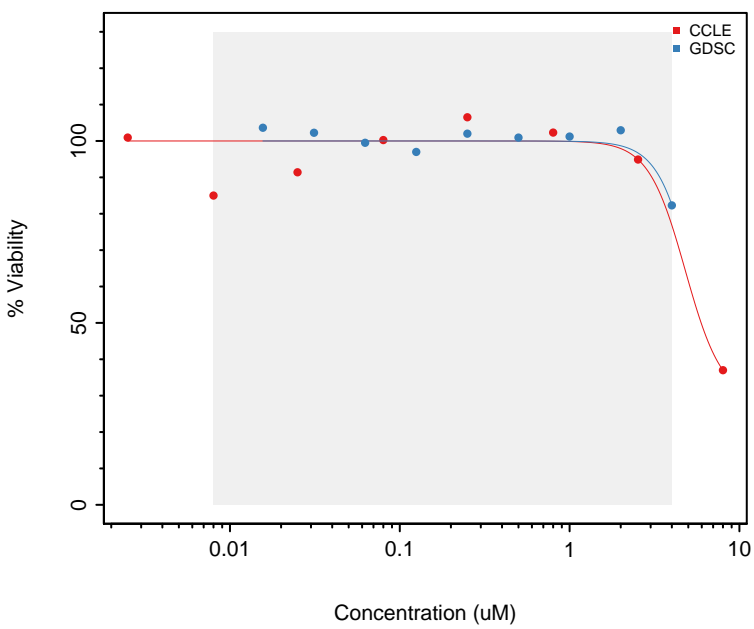

Sorafenib:SH-77

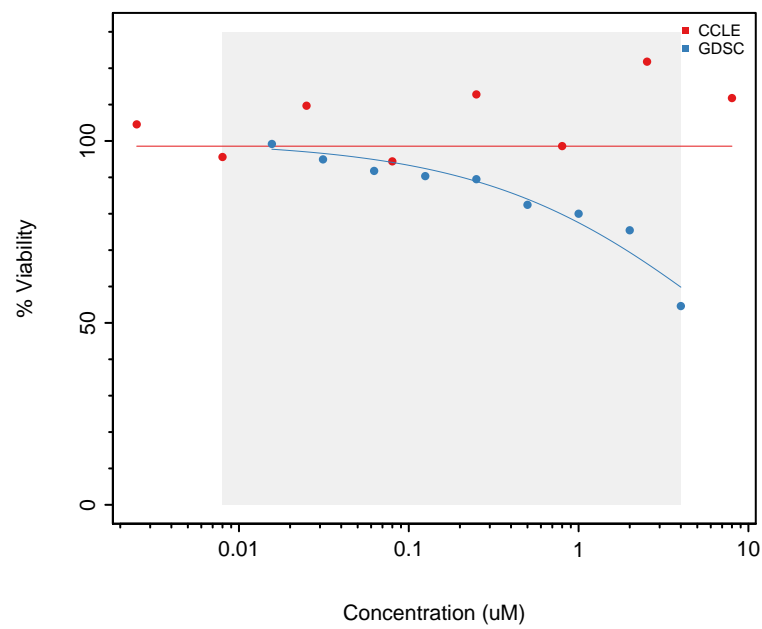

Sorafenib:SIG-M5

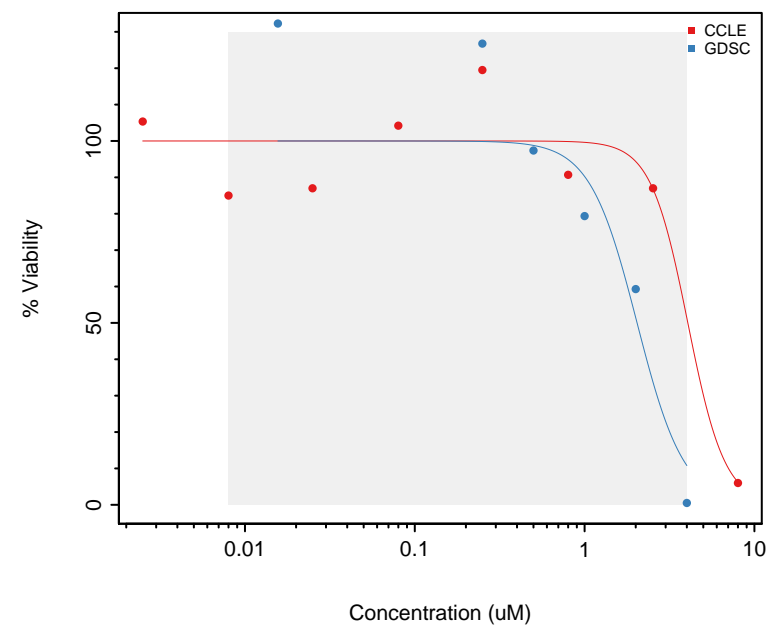

Sorafenib:SIMA

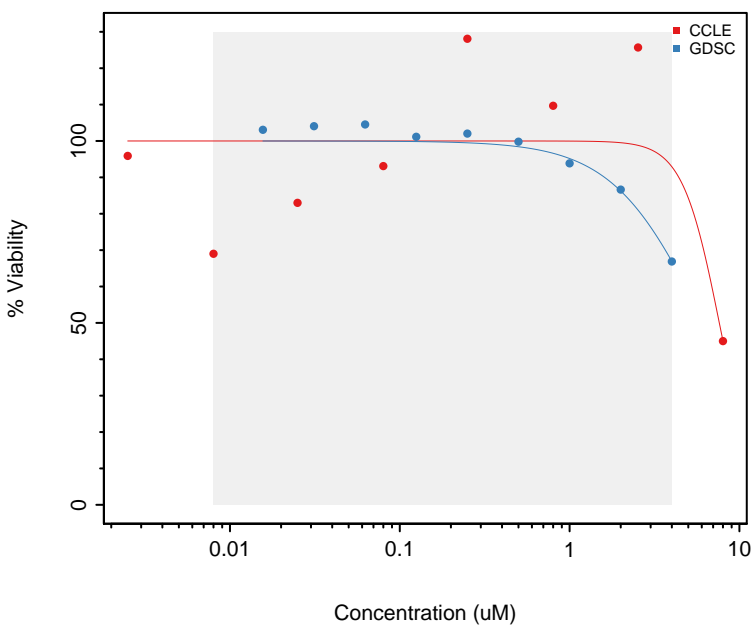

Sorafenib:SJSA-1

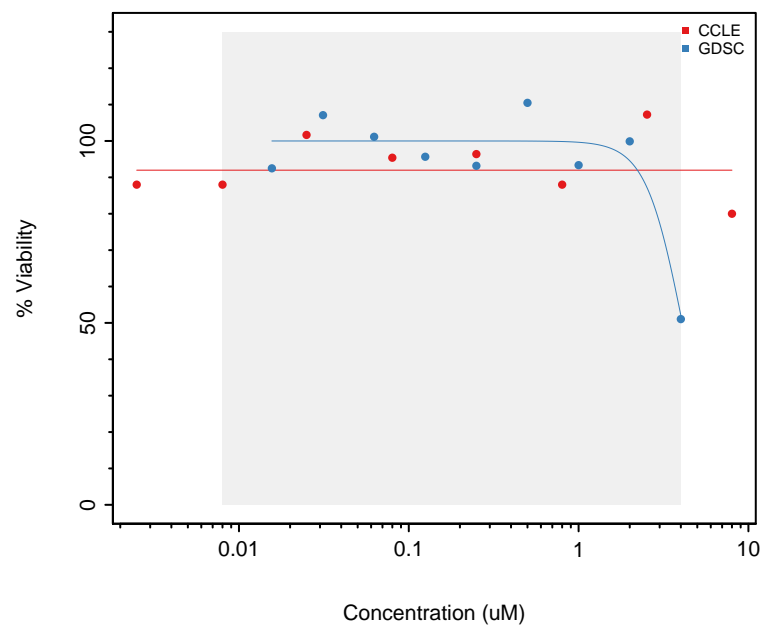

Sorafenib:SK-LMS-1

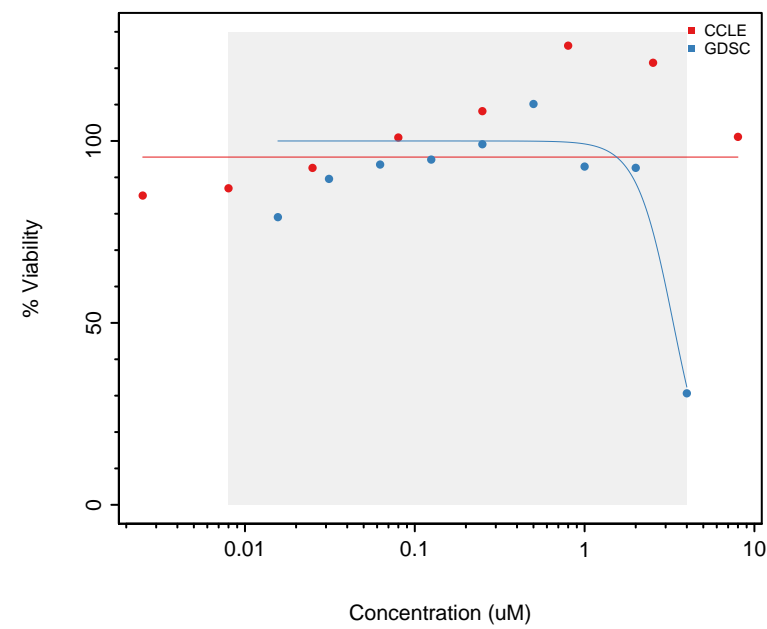

Sorafenib:SK-MEL-2

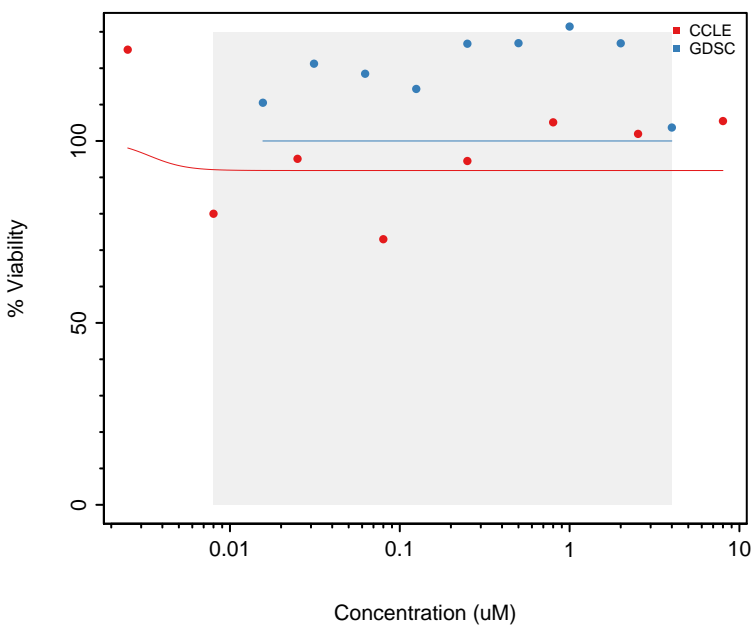

Sorafenib:SK-MM-2

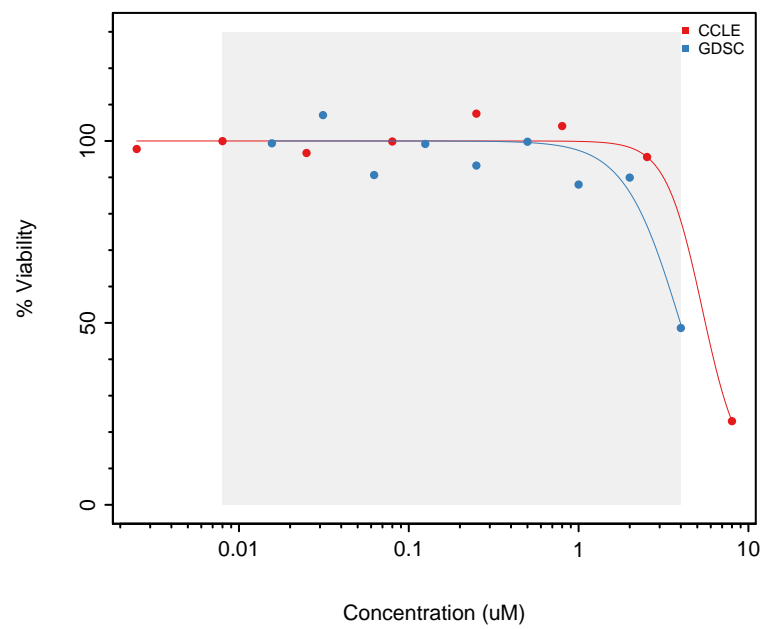

Sorafenib:SK-N-DZ

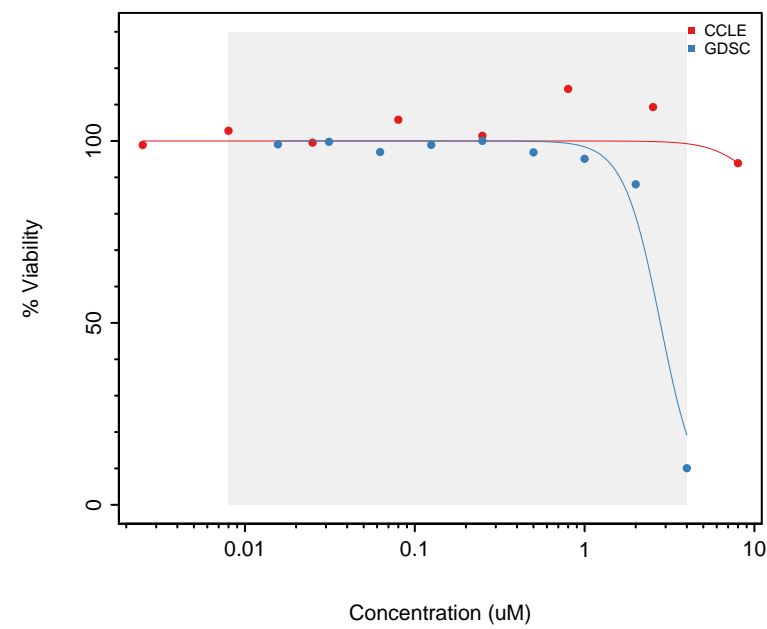

Sorafenib:SK-N-FI

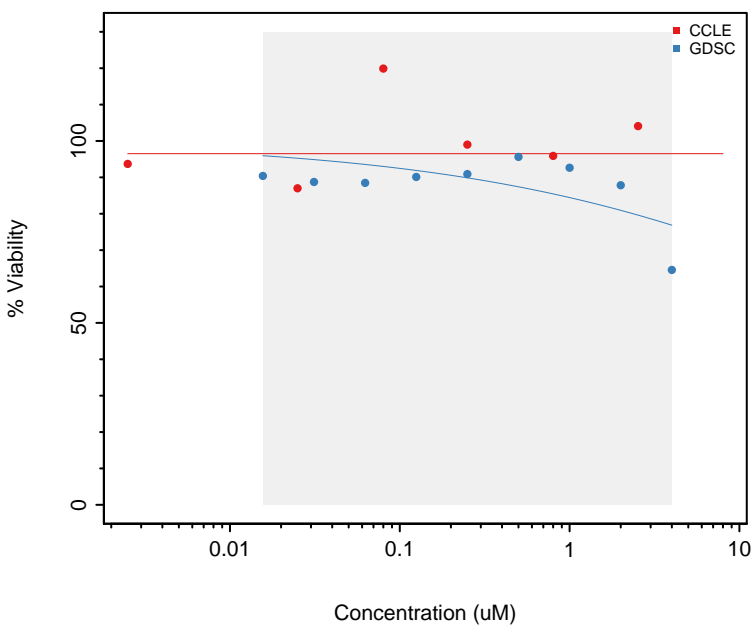

Sorafenib:NCI-SNU-1

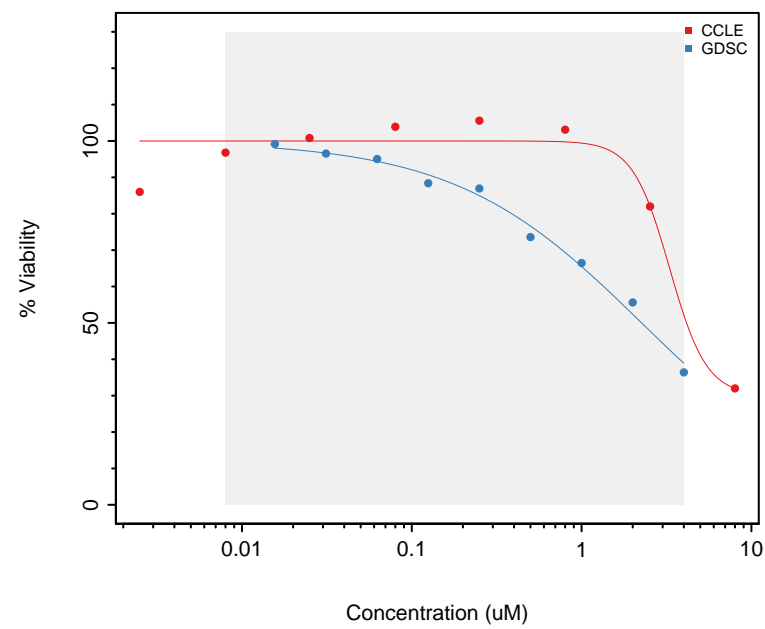

Sorafenib:NCI-SNU-16

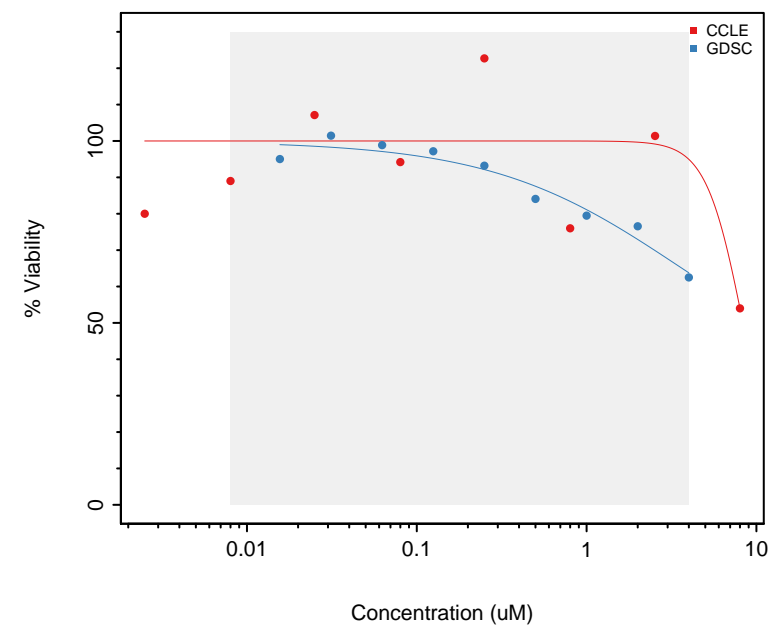

Sorafenib:SUP-T1

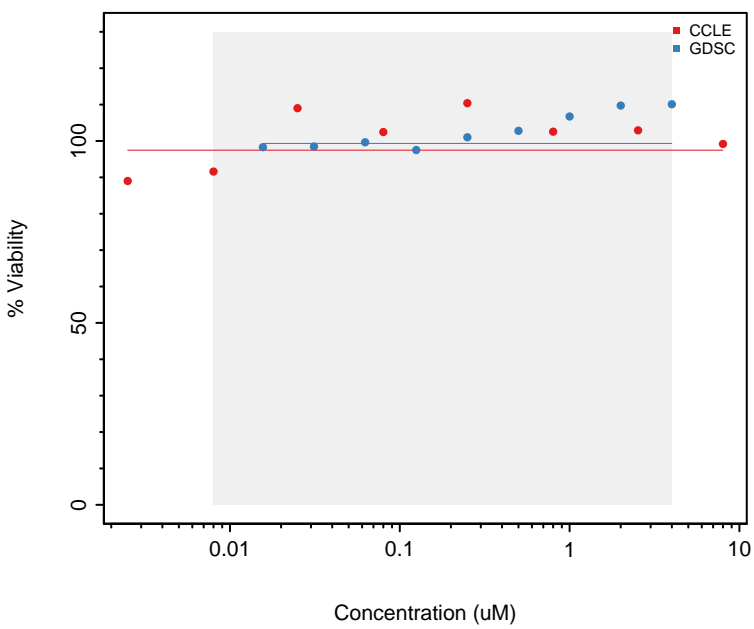

Sorafenib:TE-1

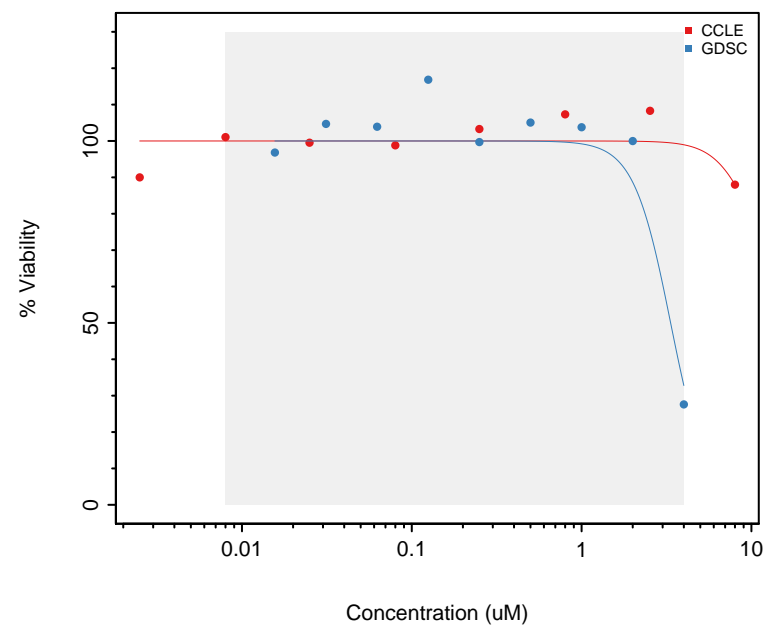

Sorafenib:TE-15

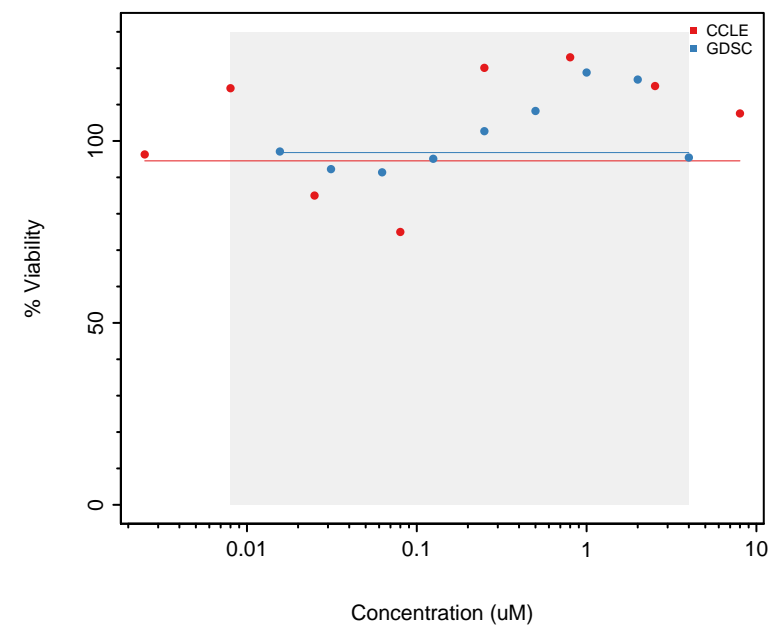

Sorafenib:TE-5

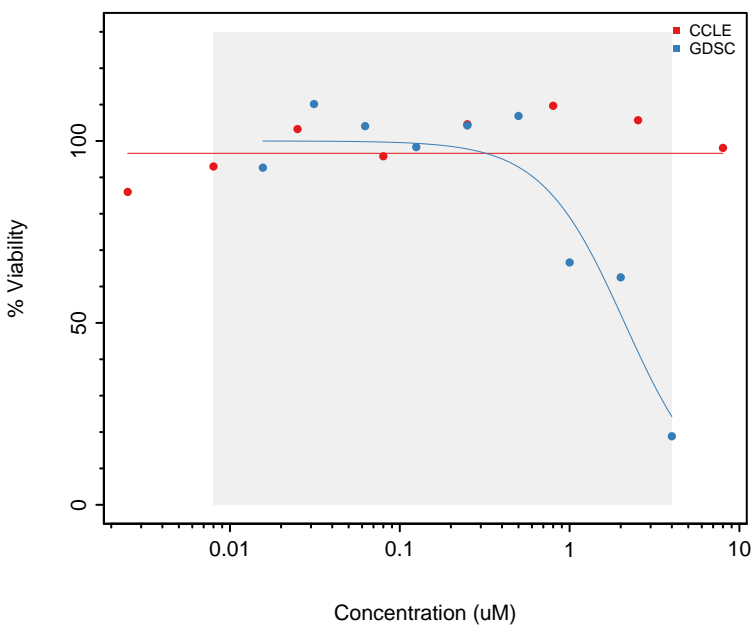

Sorafenib:TE-9

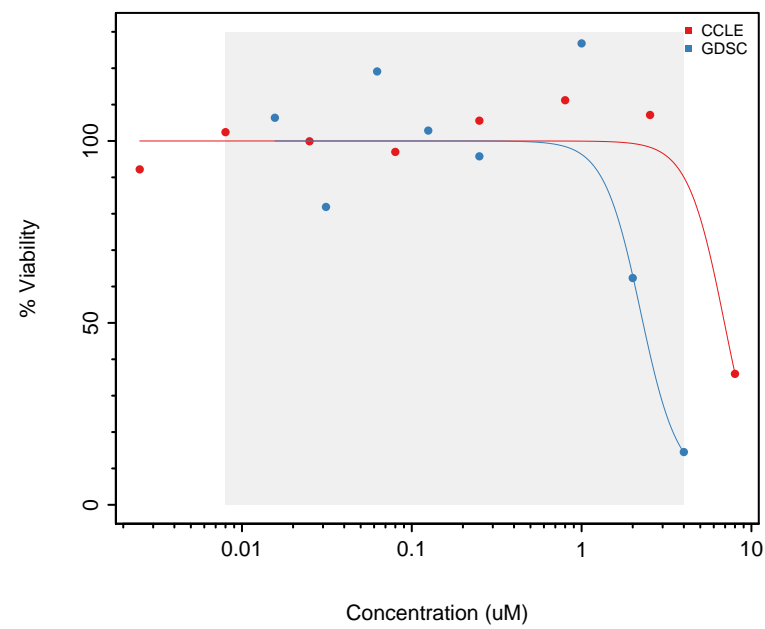

Sorafenib:U-87-MG

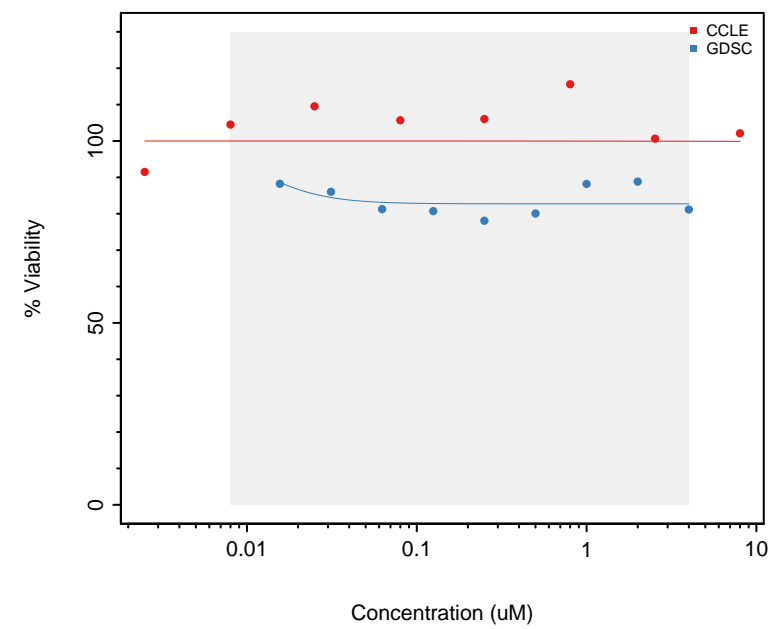

Sorafenib:UACC-812

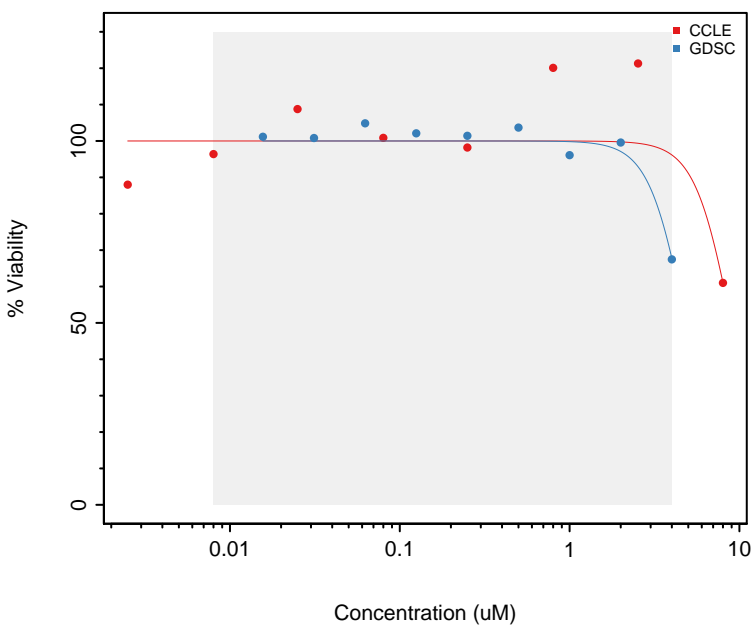

PD-0325901:22RV1

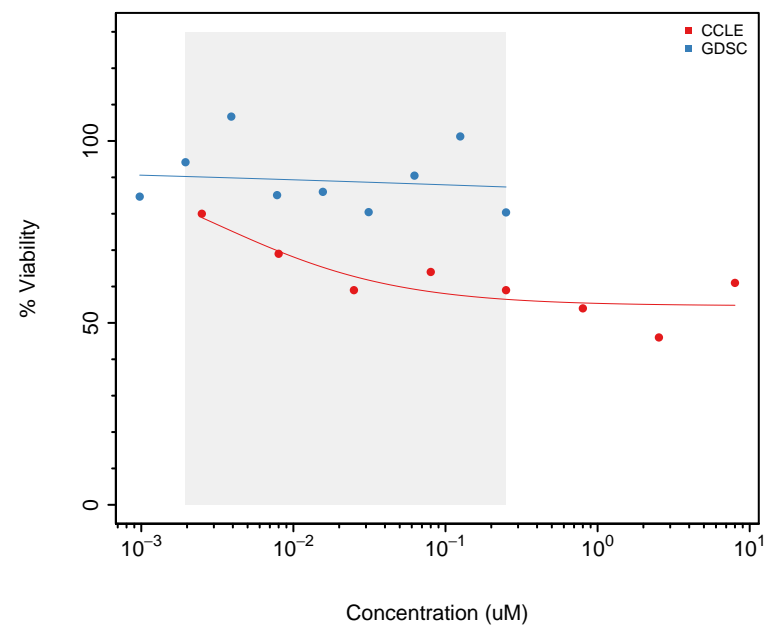

PD-0325901:5637

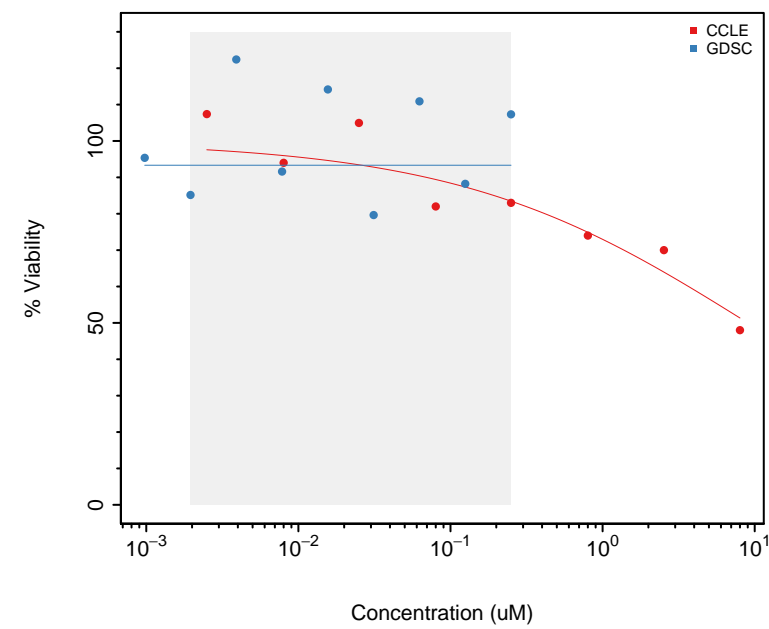

PD-0325901:639-V

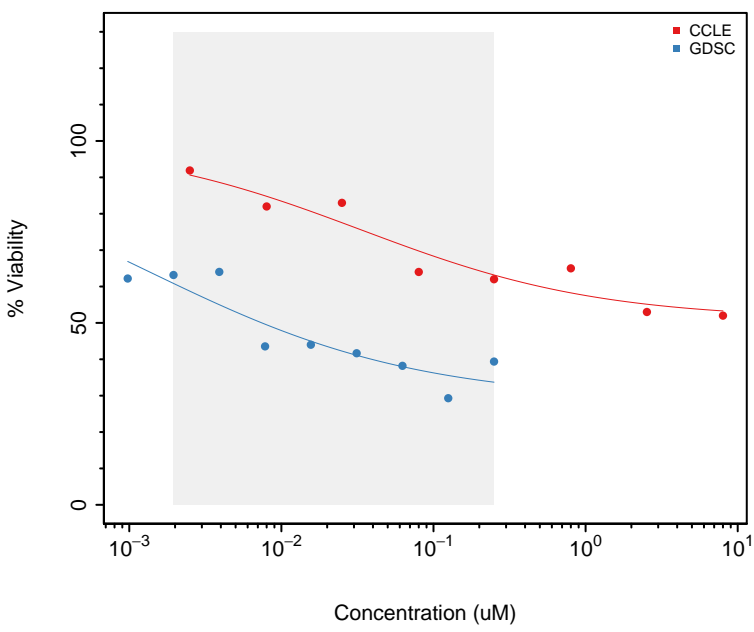

PD-0325901:697

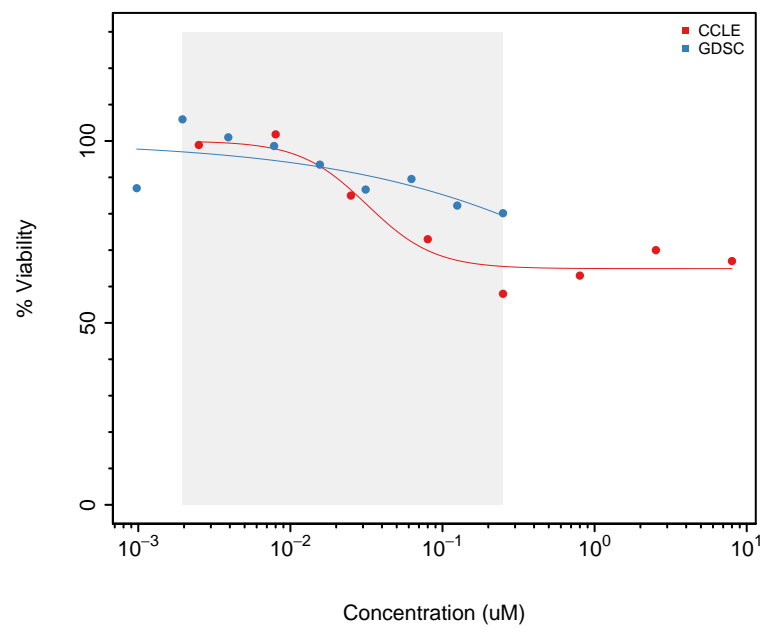

PD-0325901:769-P

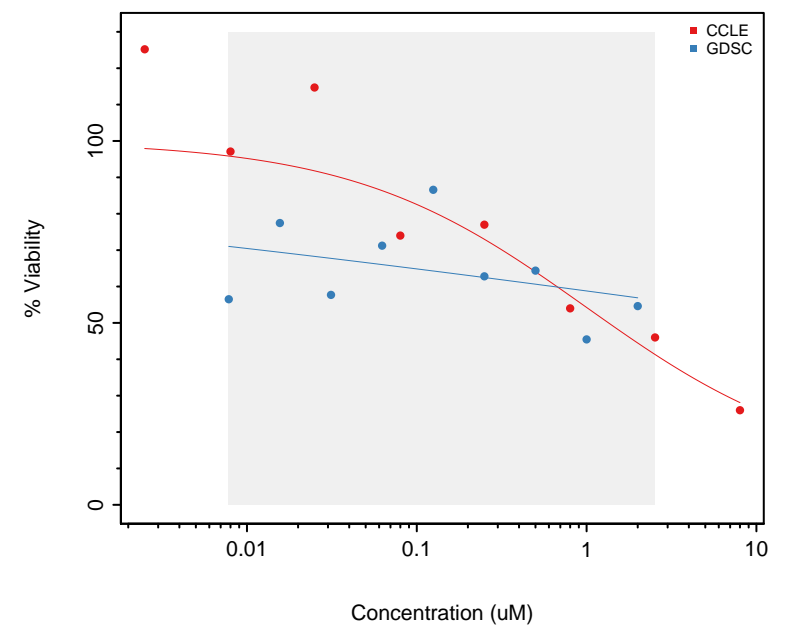

PD-0325901:786-0

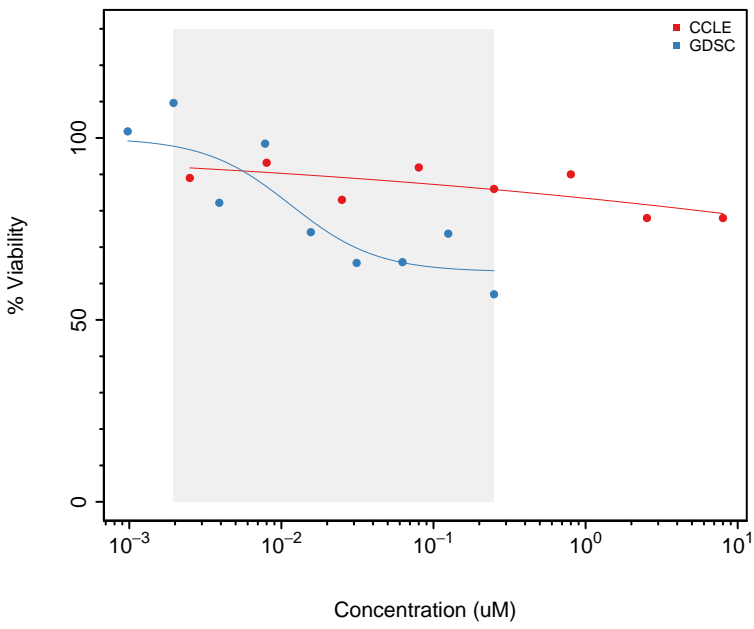

PD-0325901:8305C

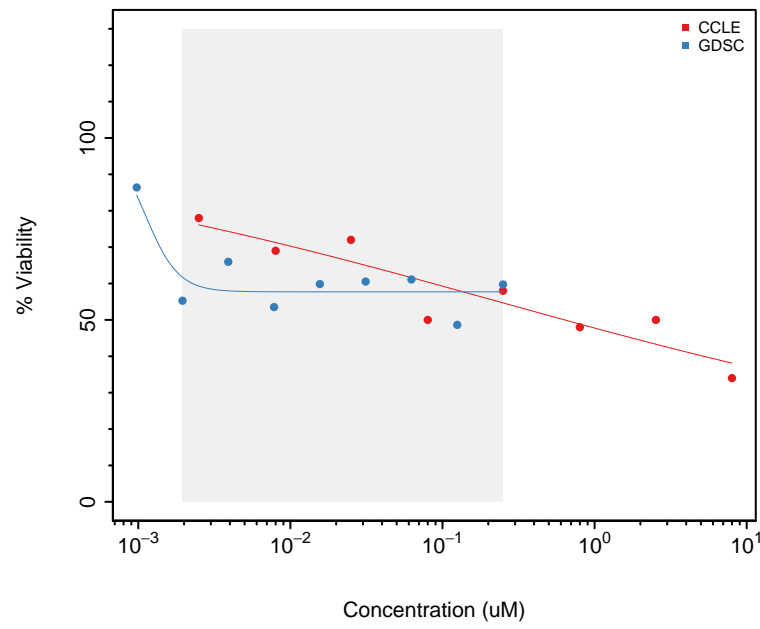

PD-0325901:8505C

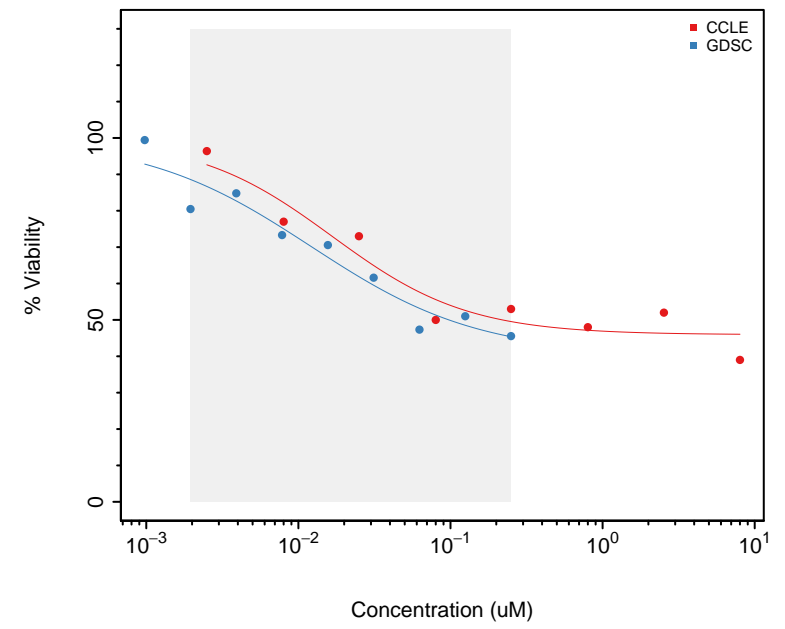

PD-0325901:8-MG-BA

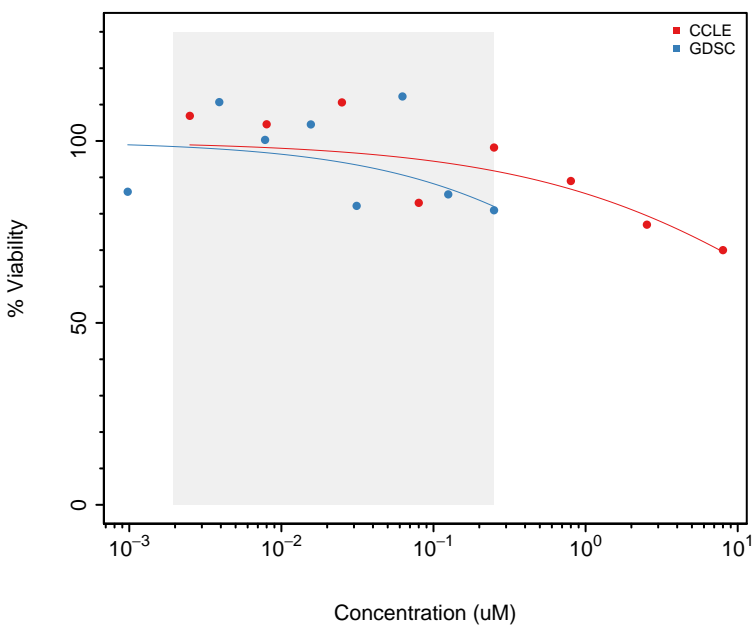

PD-0325901:A204

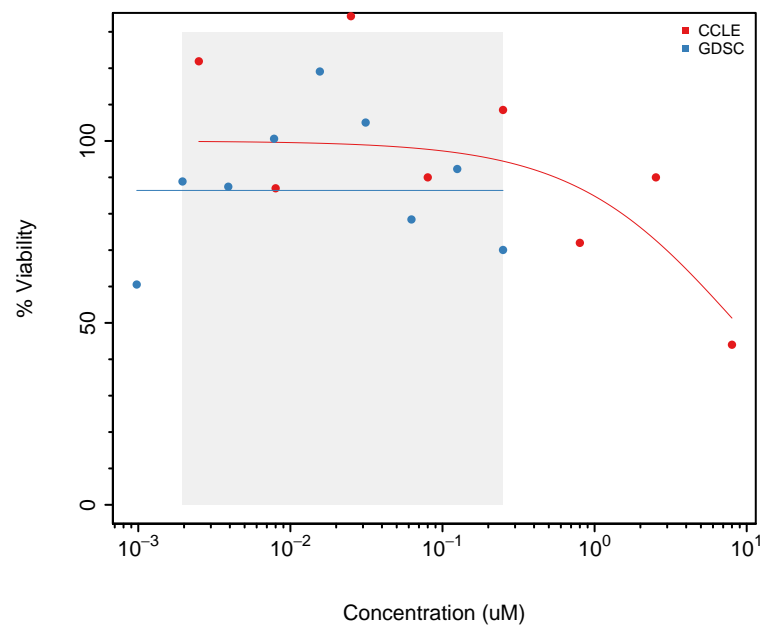

PD-0325901:A2058

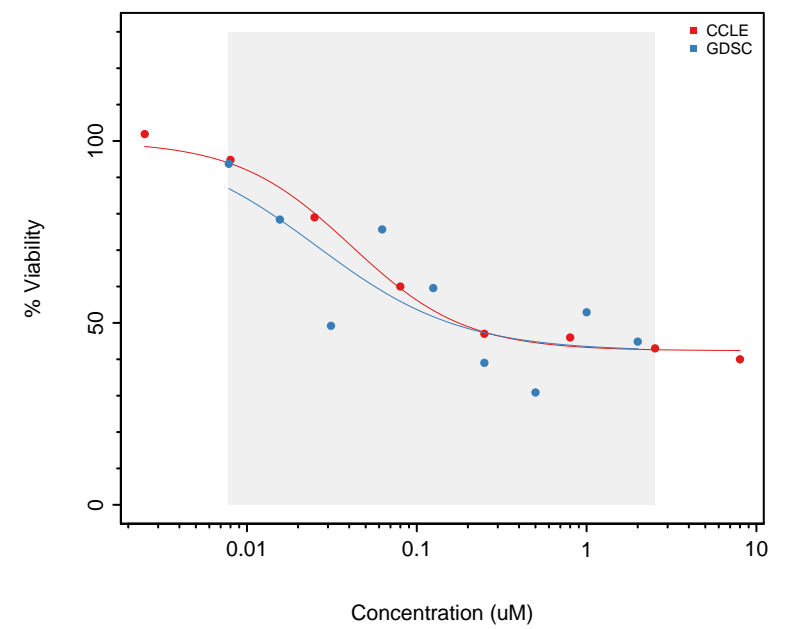

PD-0325901:A253

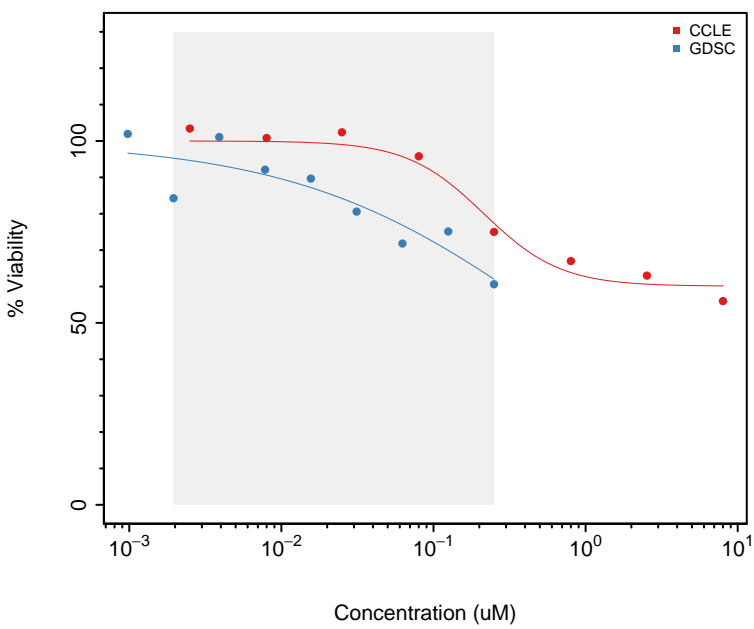

PD-0325901:A2780

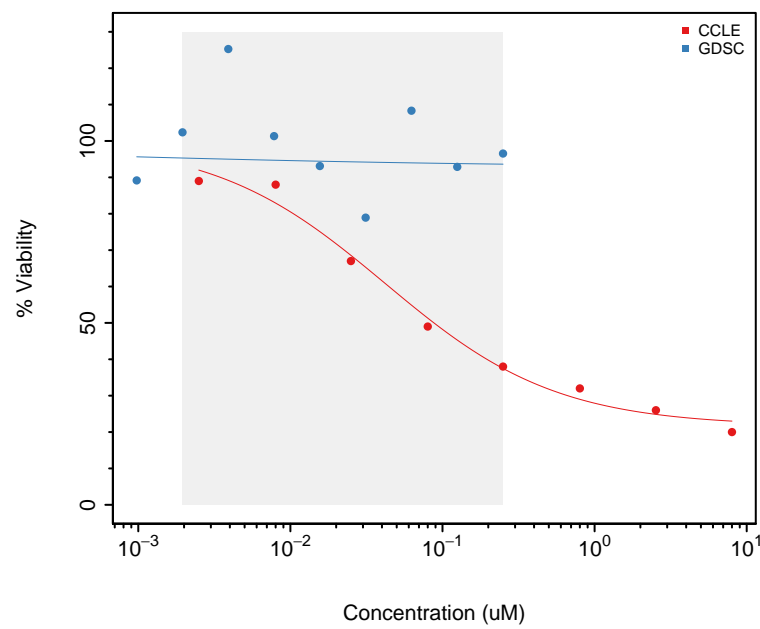

PD-0325901:A375

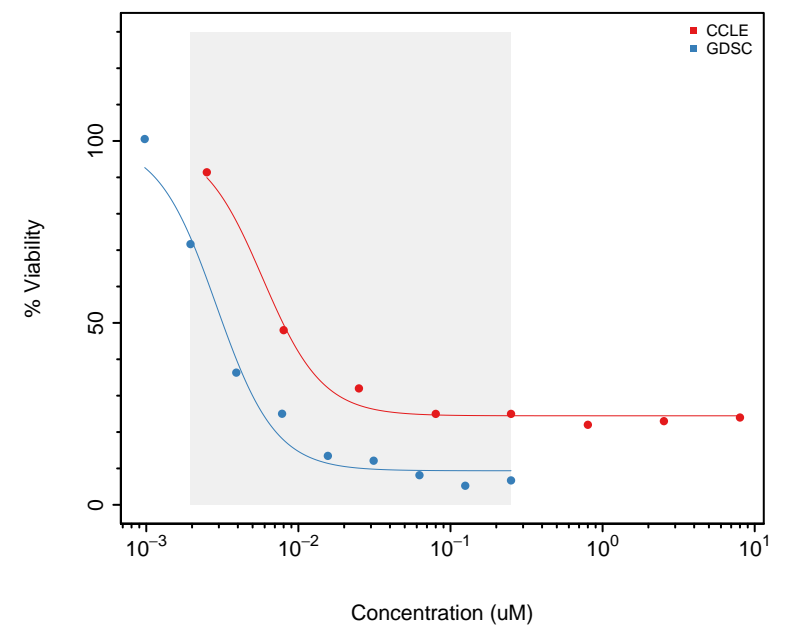

PD-0325901:A549

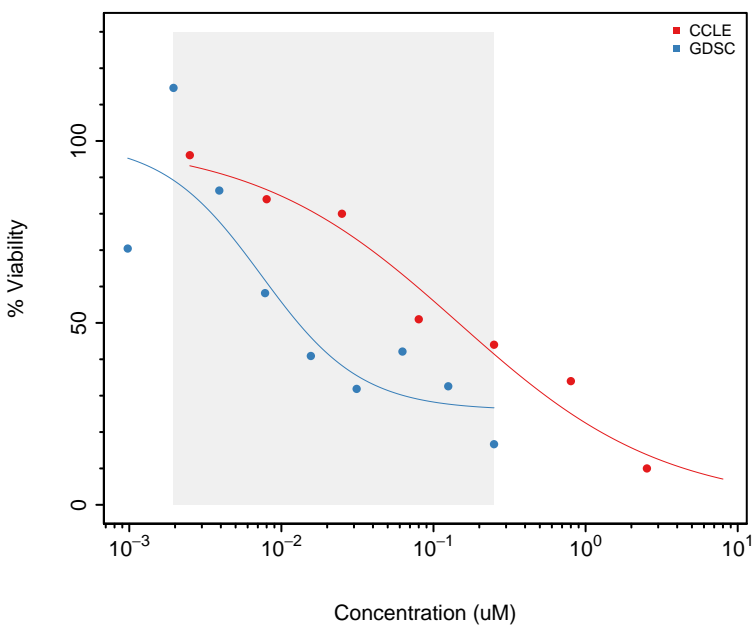

PD-0325901:A673

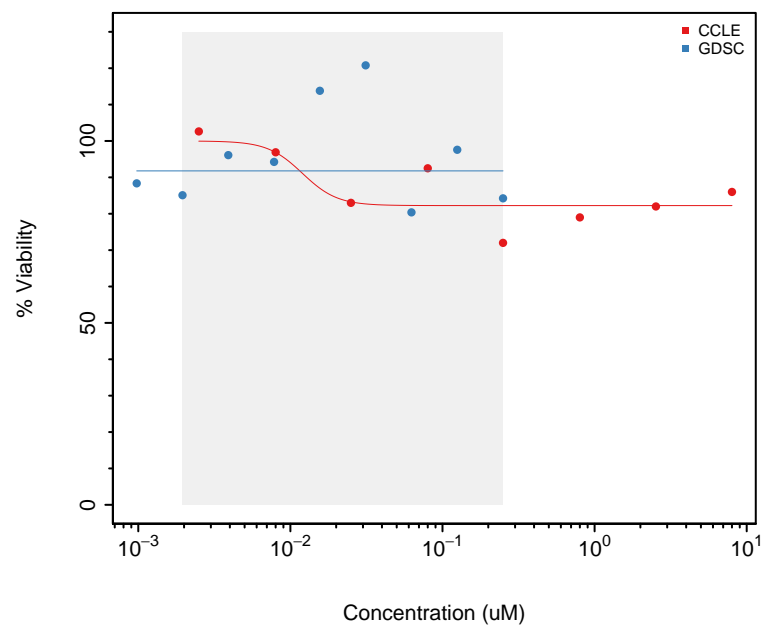

PD-0325901:ACHN

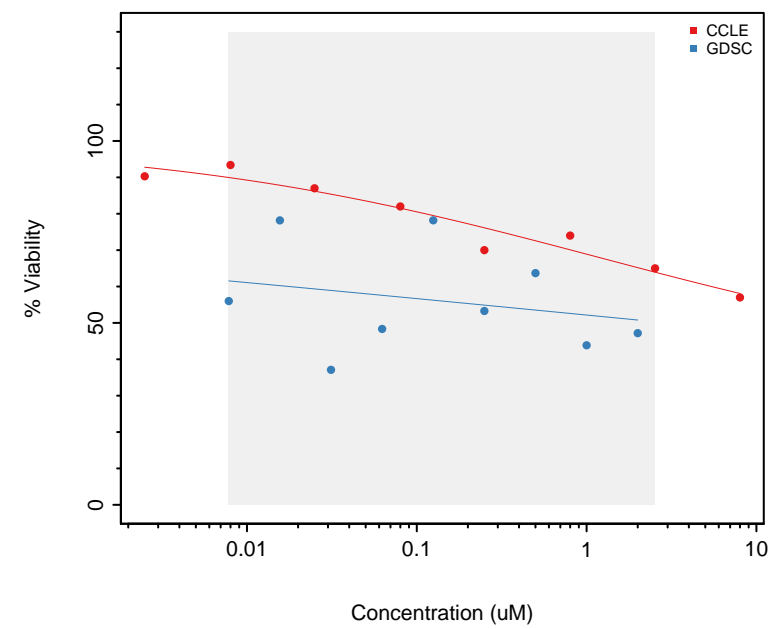

PD-0325901:AsPC-1

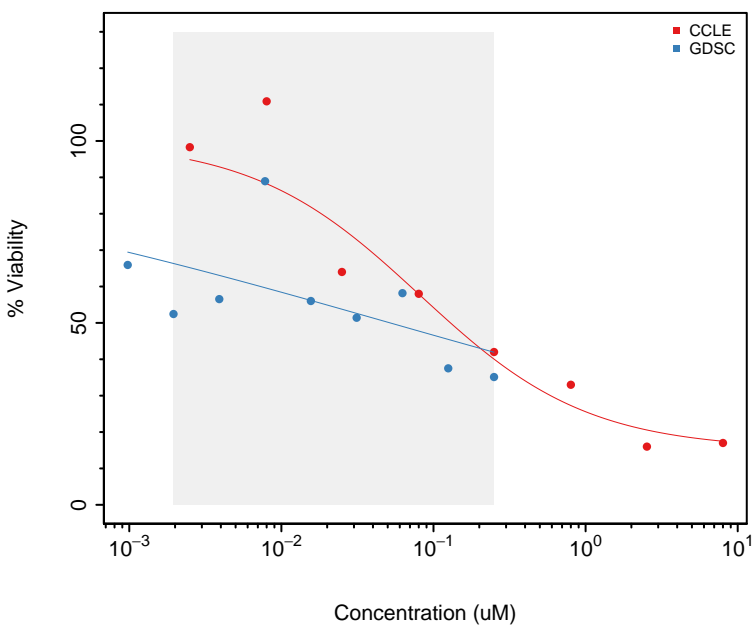

PD-0325901:AU565

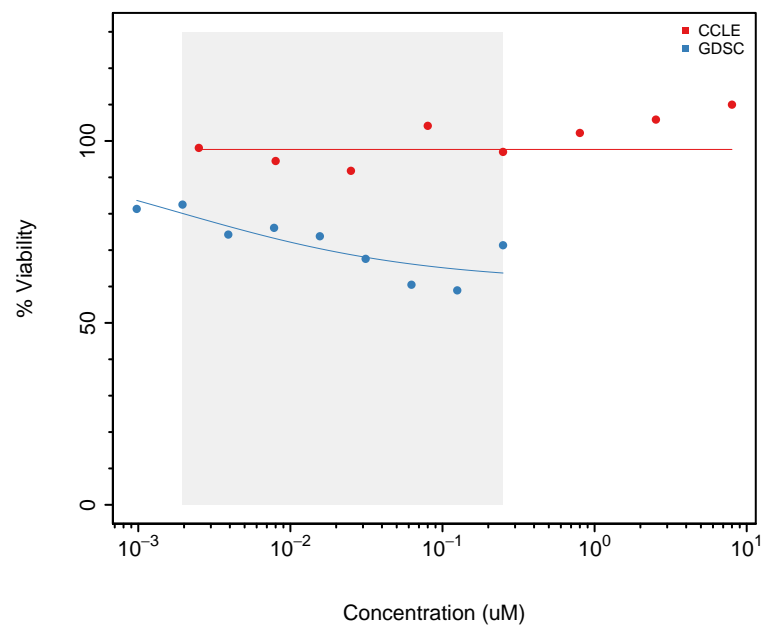

PD-0325901:BCPAP

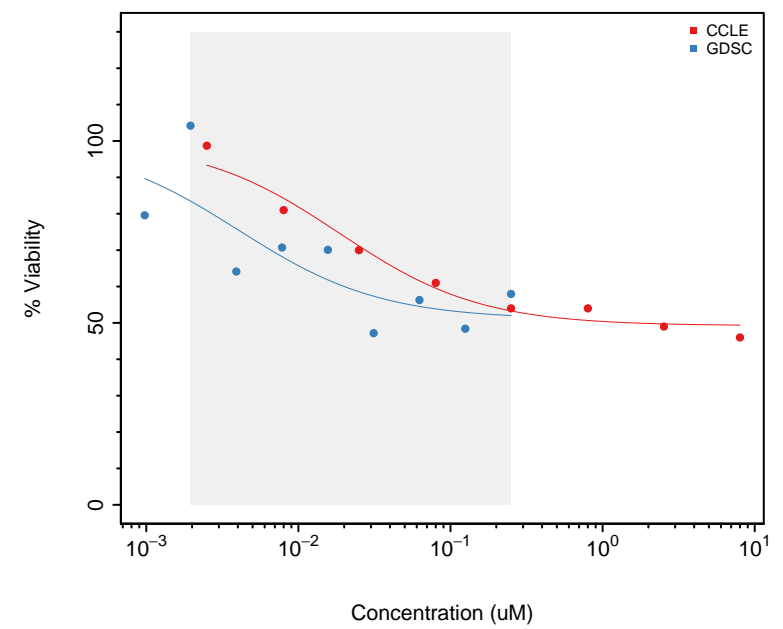

PD-0325901:BTFC-909

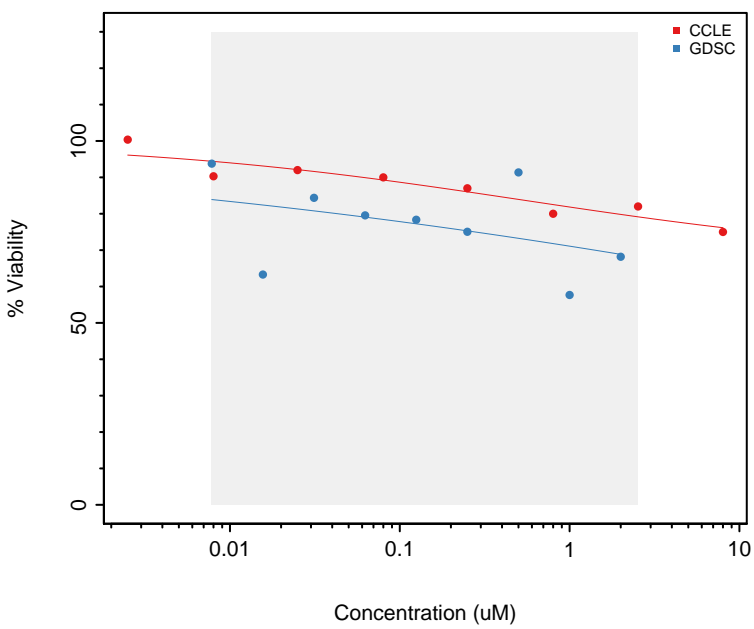

PD-0325901:BL-41

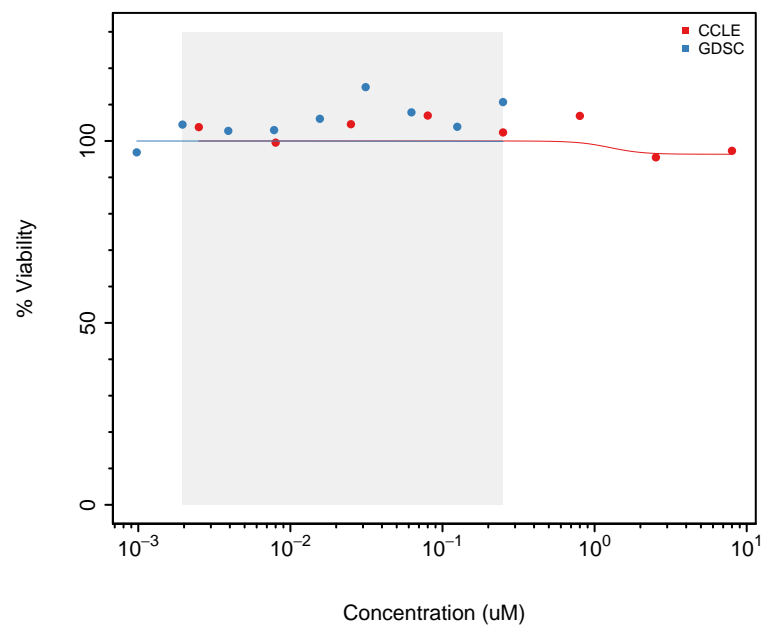

PD-0325901:BT-20

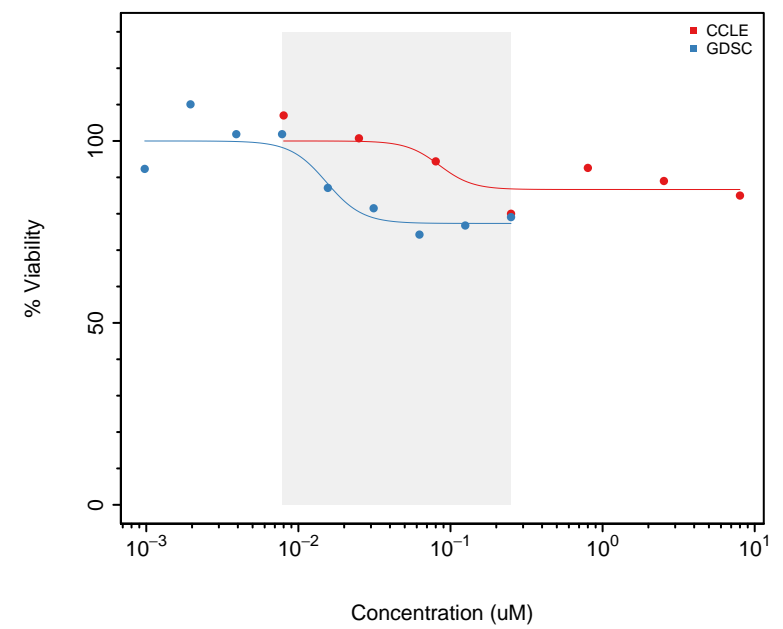

PD-0325901:BT-474

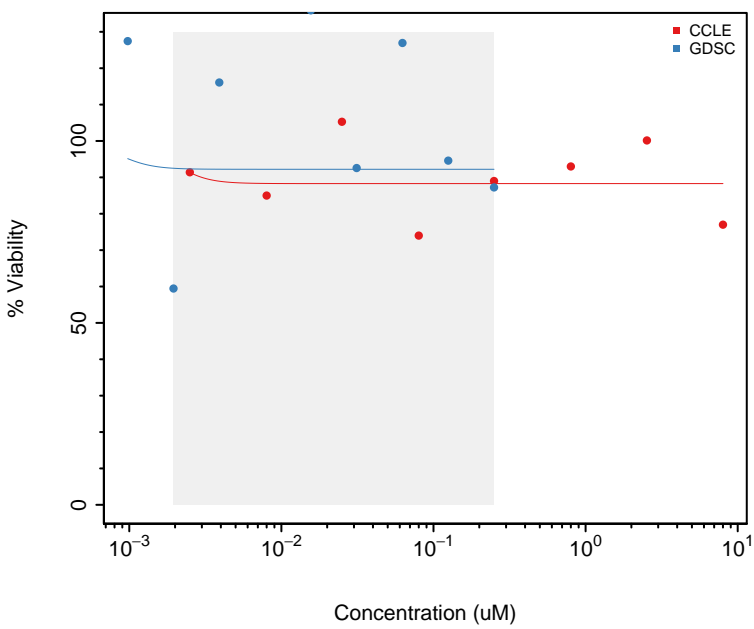

PD-0325901:BT-549

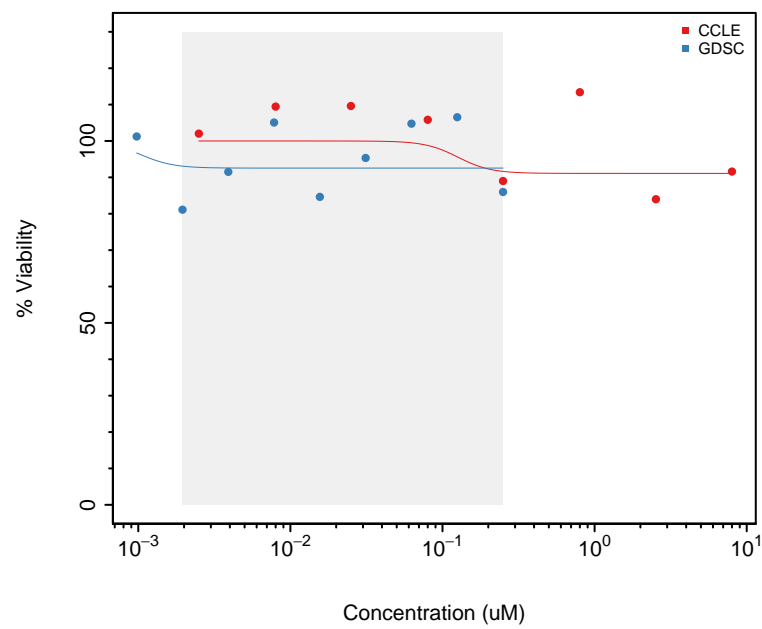

PD-0325901:BxPC-3

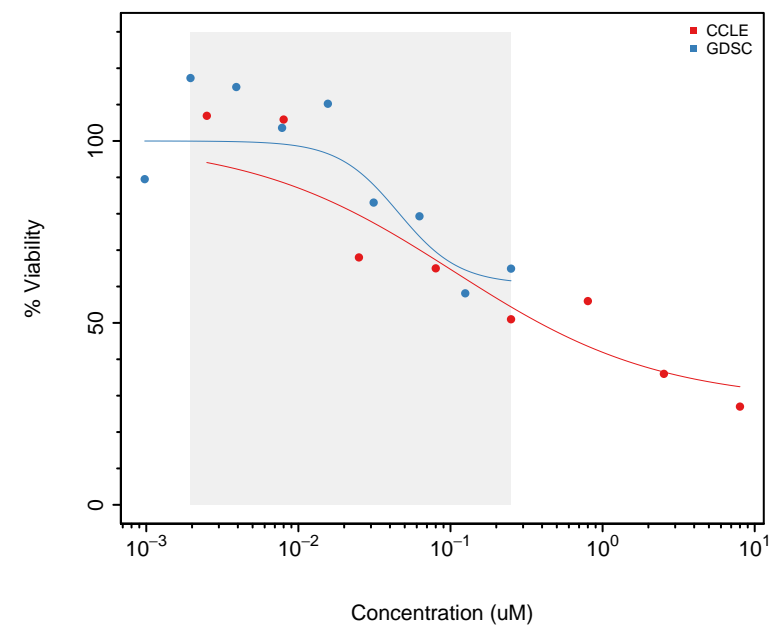



PD-0325901:COLO-205

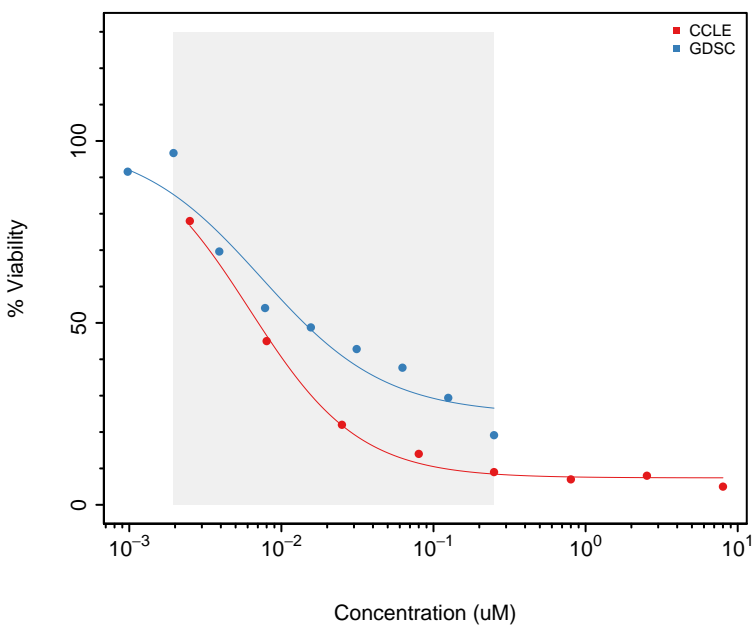

PD-0325901:COLO-320-HSR

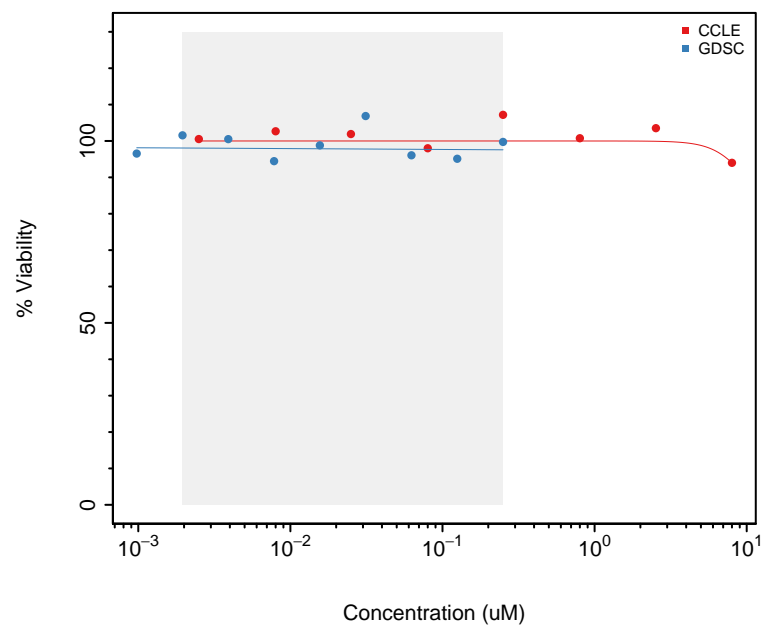

PD-0325901:COLO-678

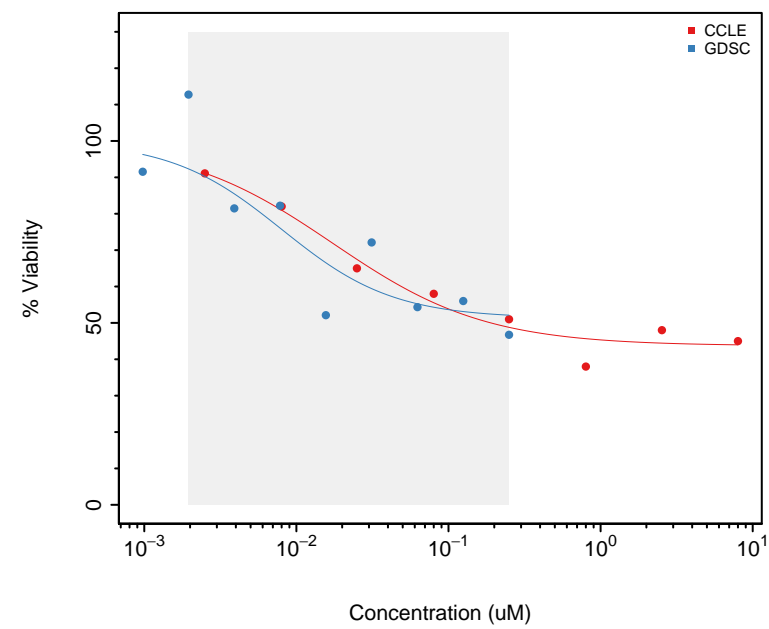

PD-0325901:COLO-679

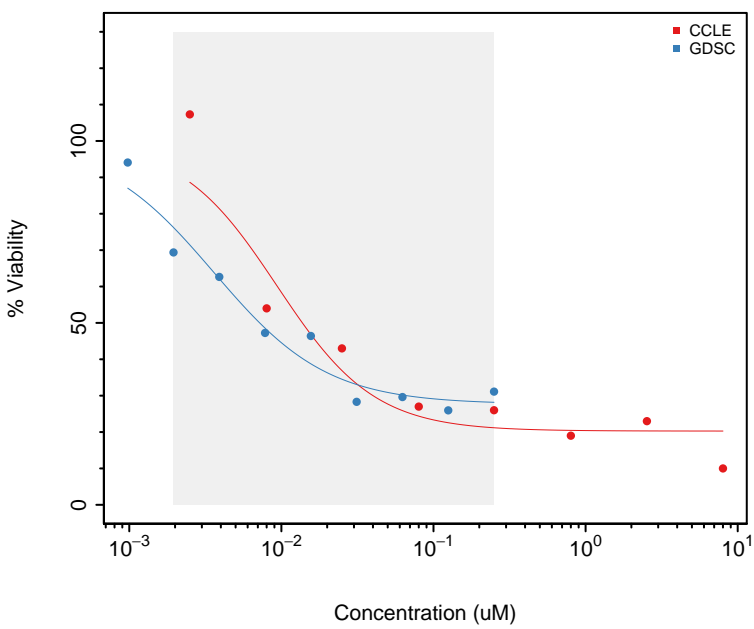

PD-0325901:COLO-741

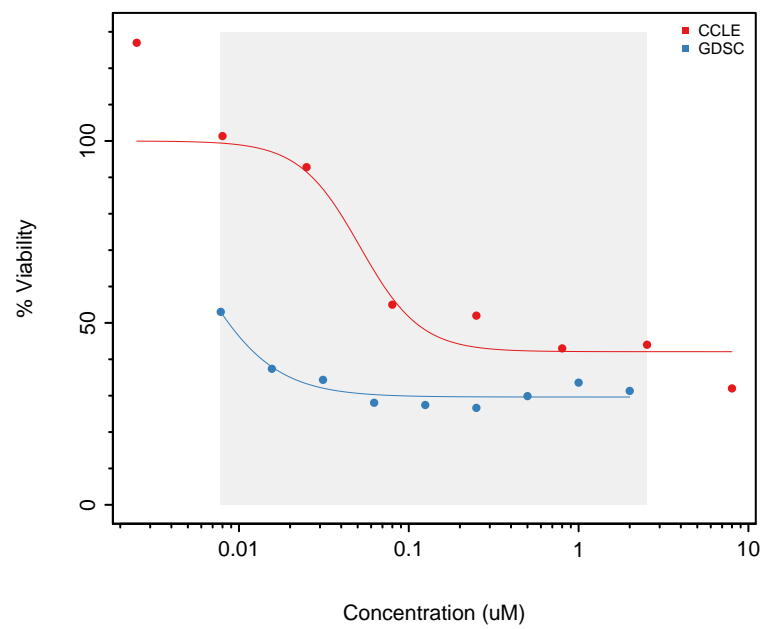

PD-0325901:COR-L105

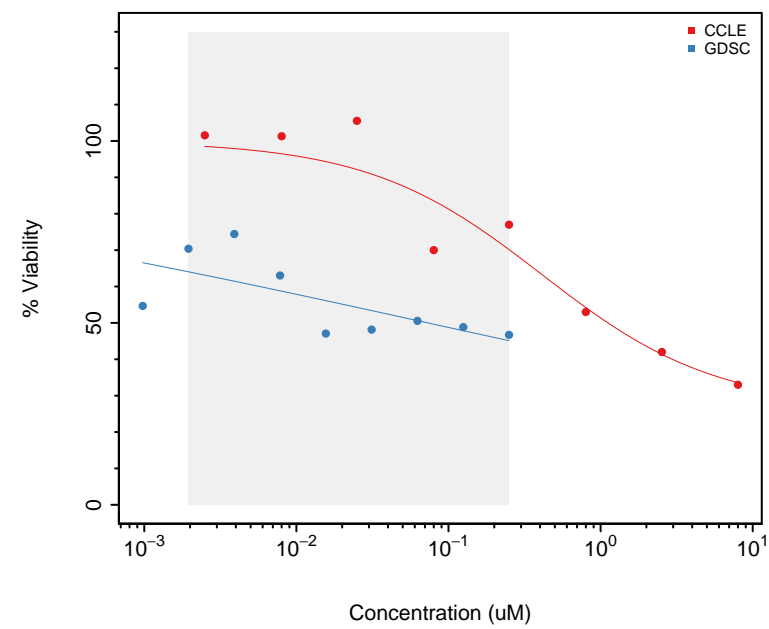

PD-0325901:COR-L23

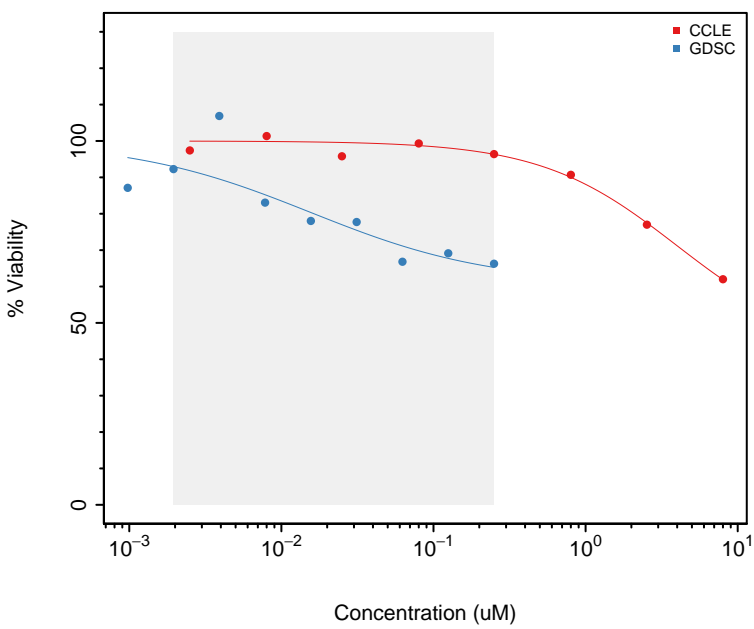

PD-0325901:DBTRG-05MG

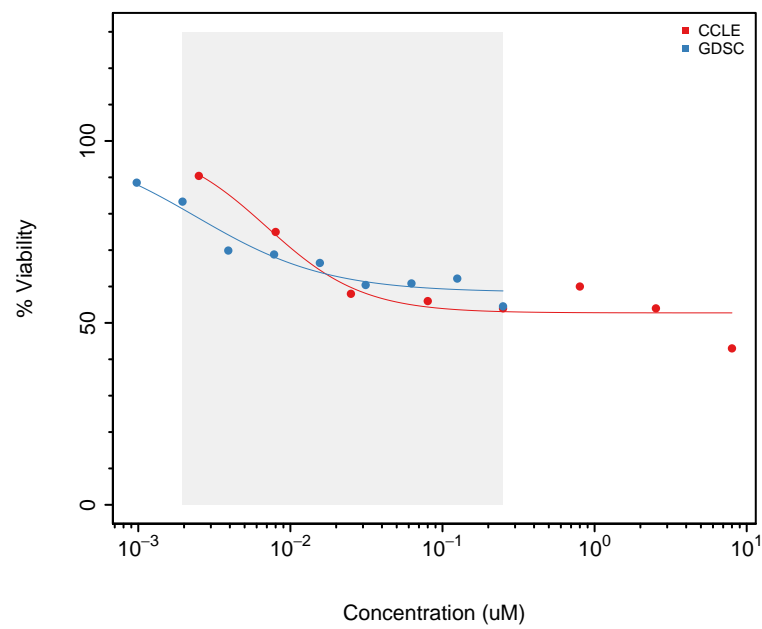

PD-0325901:DEL

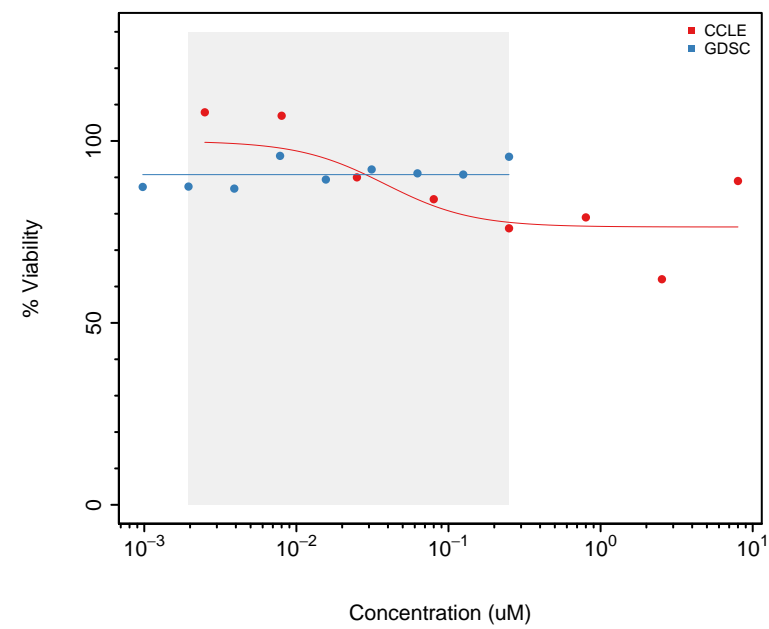

PD-0325901:Detroit562

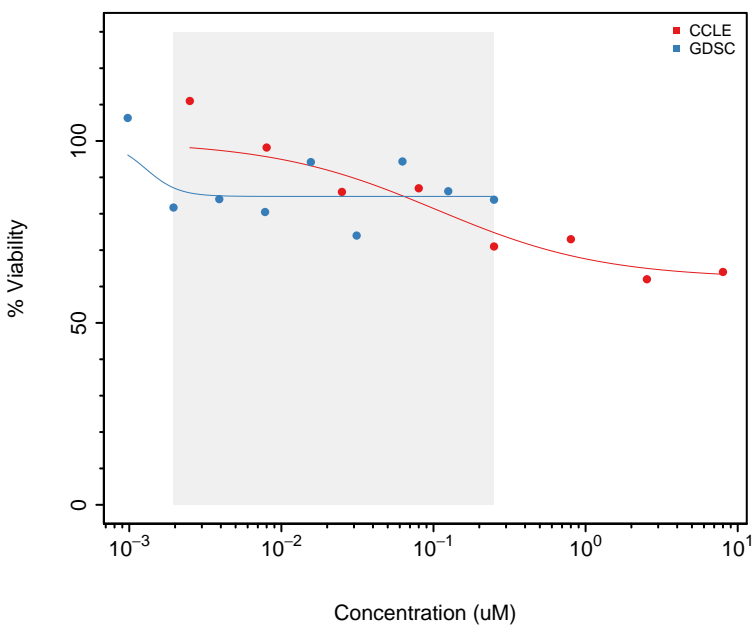

PD-0325901:DK-MG

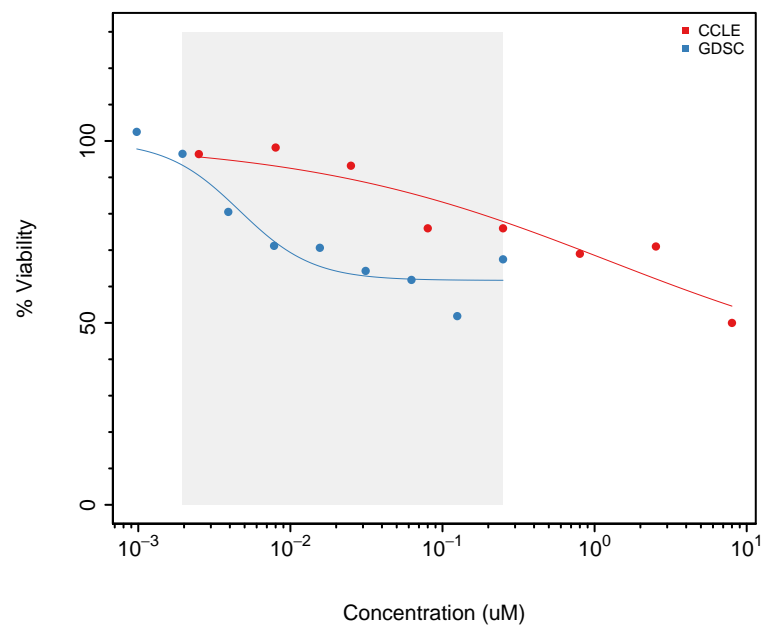

PD-0325901:DMS-114

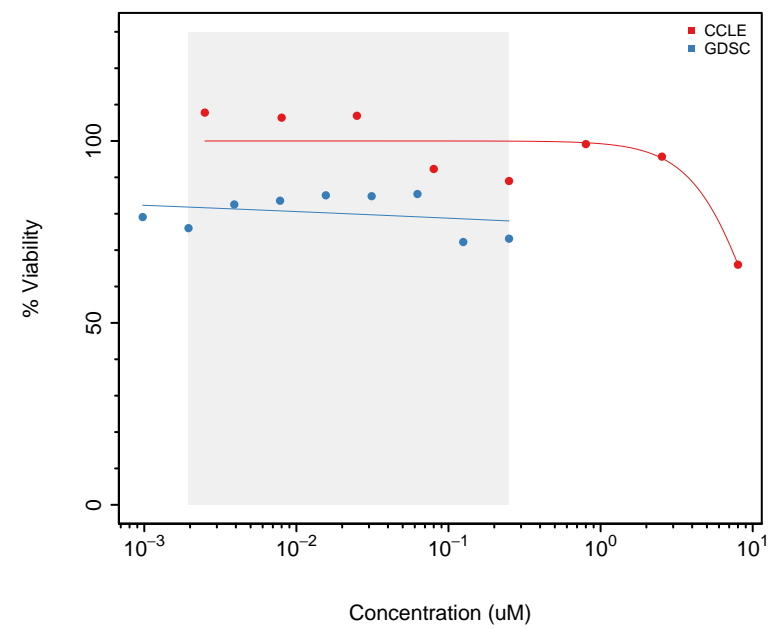

PD-0325901:DOHH-2

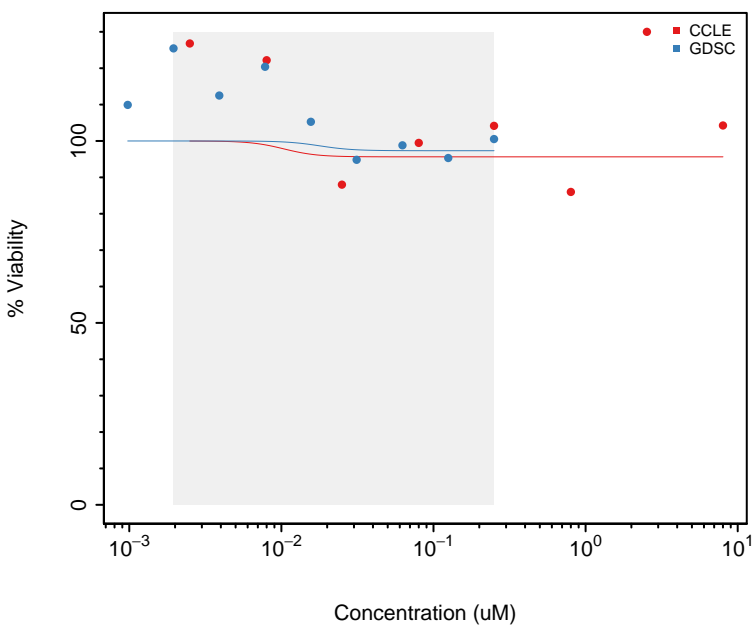

PD-0325901:DU-145

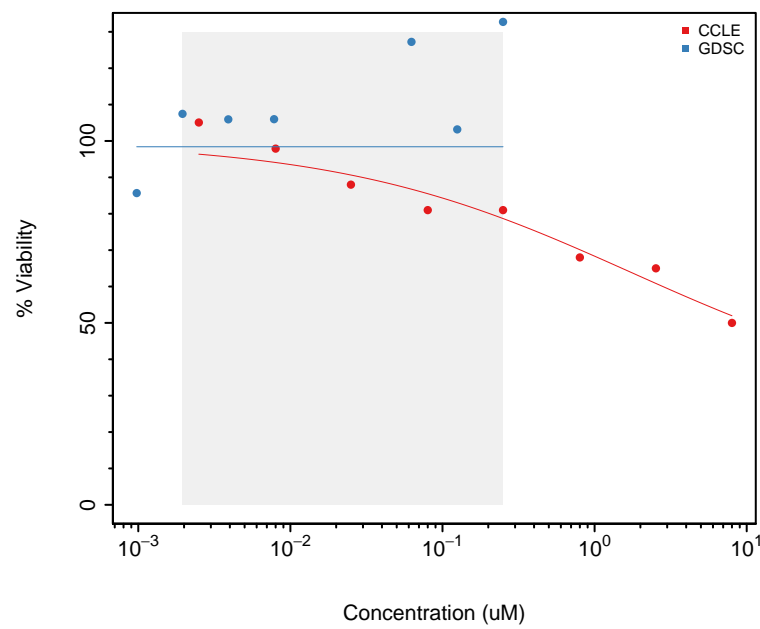

PD-0325901:EB2

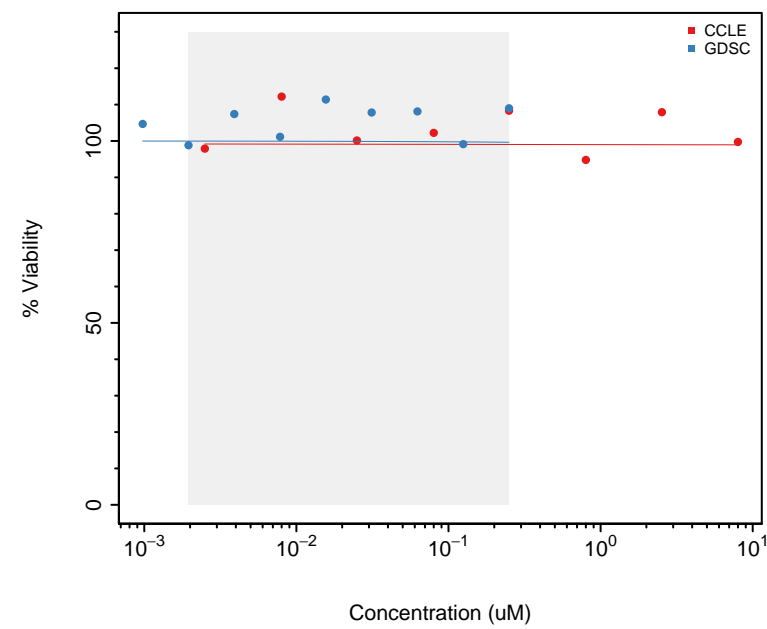

PD-0325901:EFE-184

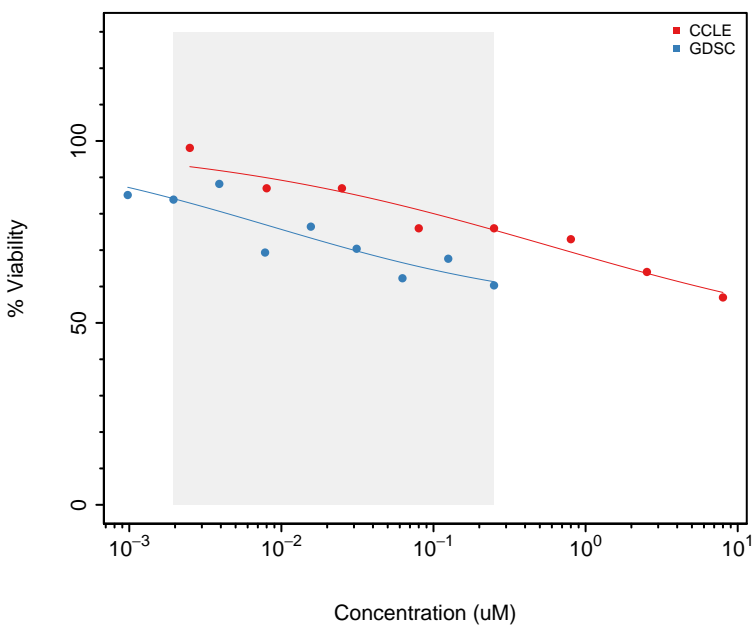

PD-0325901:EFO-21

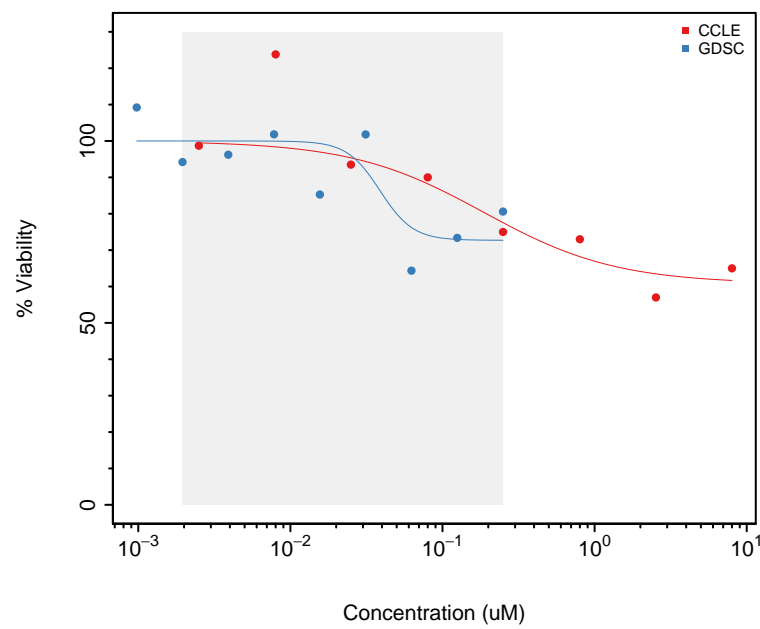

PD-0325901:EFO-27

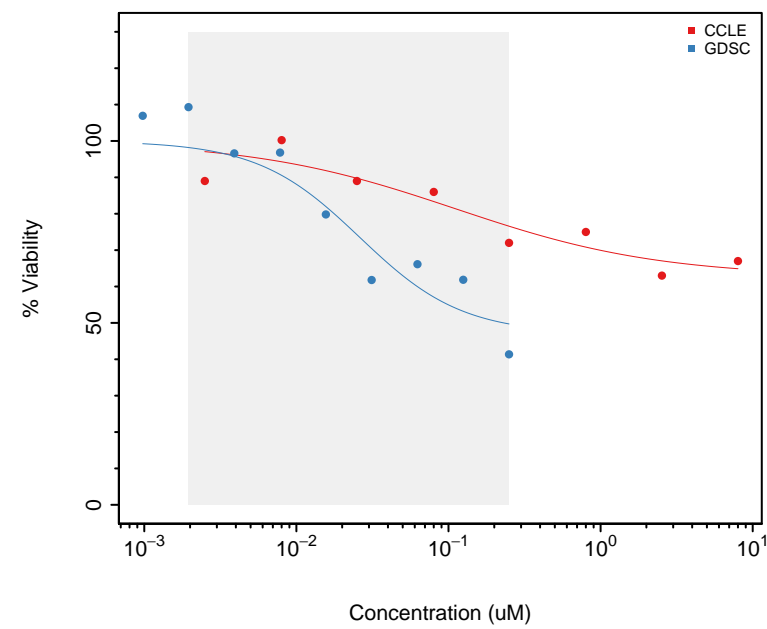

PD-0325901:EM-2

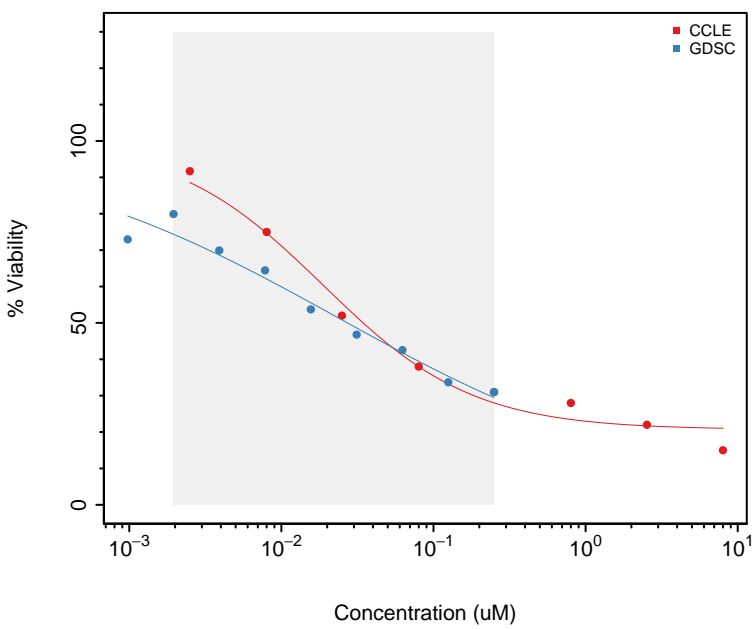

PD-0325901:ESS-1

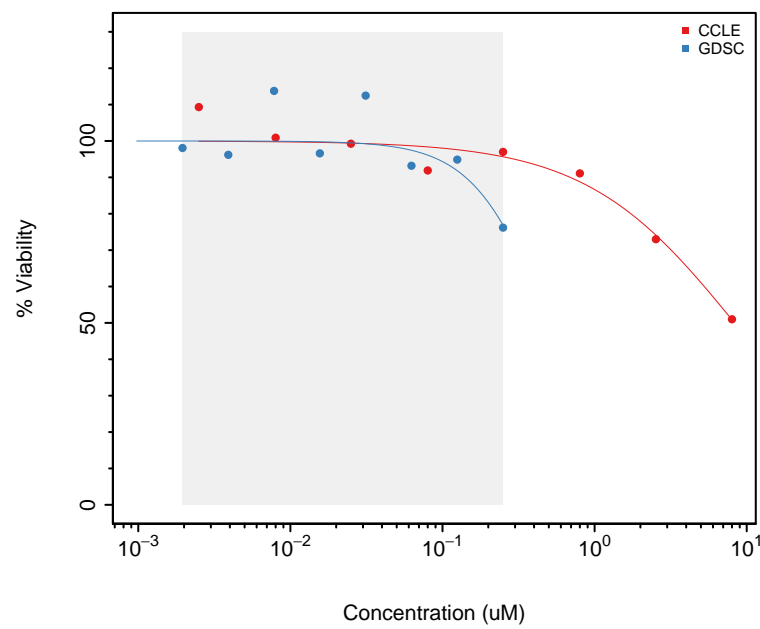

PD-0325901:FADU

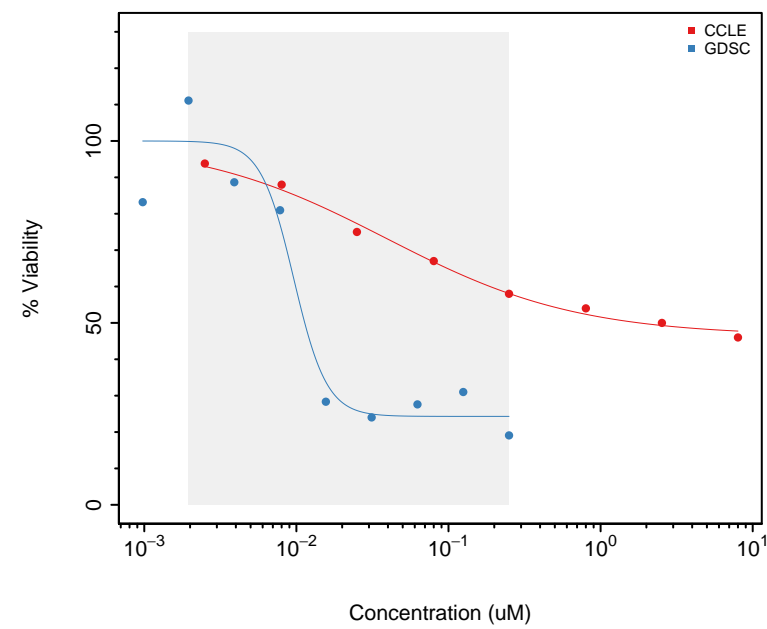

PD-0325901:G-361

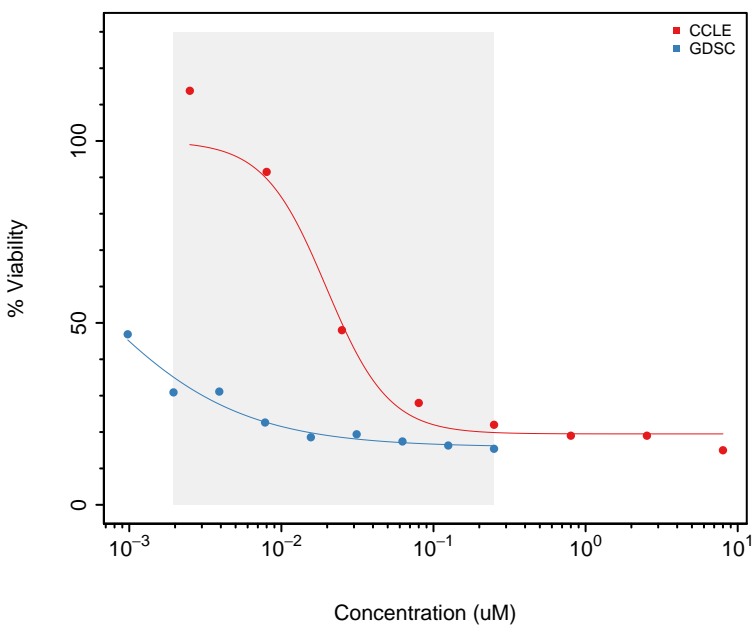

PD-0325901:G-401

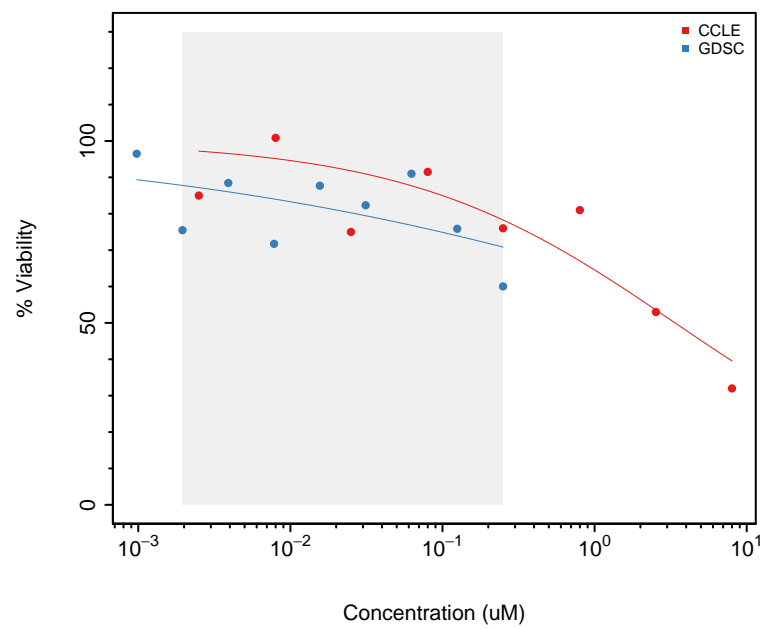

PD-0325901:G-402

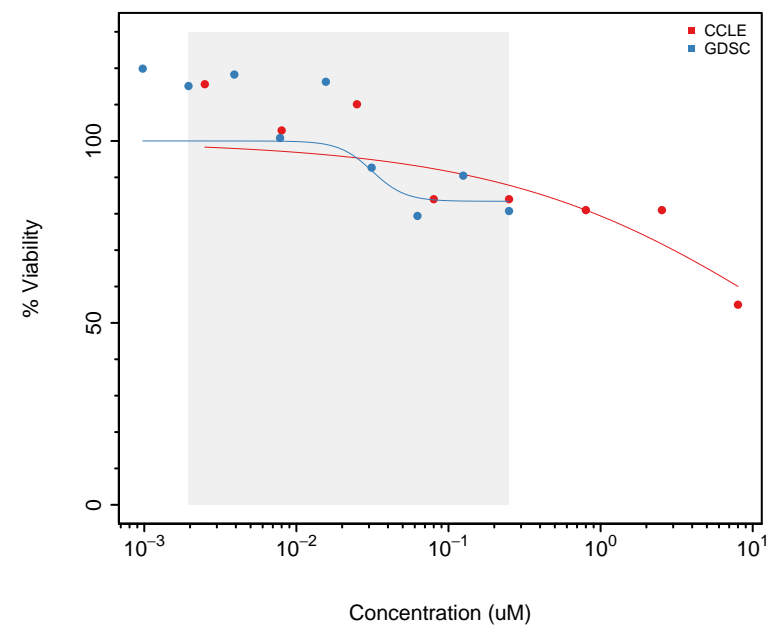





PD-0325901:HCT-15

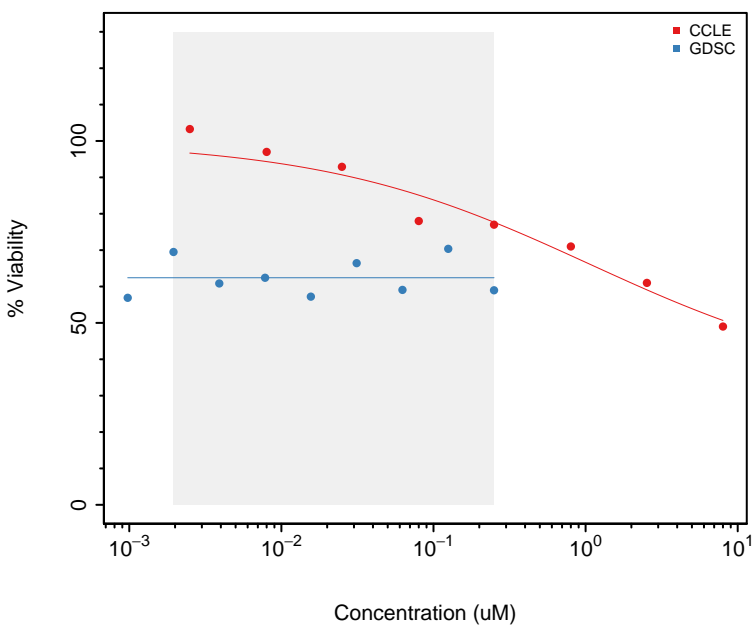

PD-0325901:HD-MY-Z

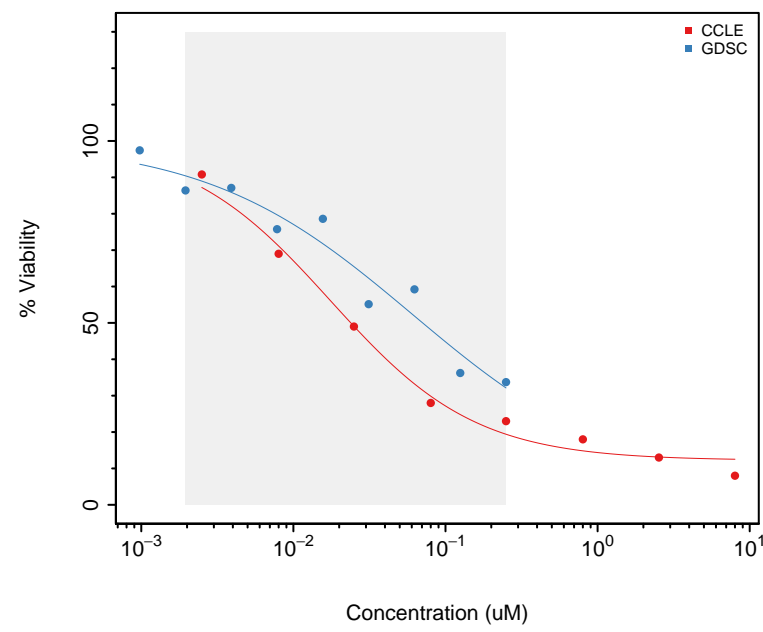

PD-0325901:HEC-1

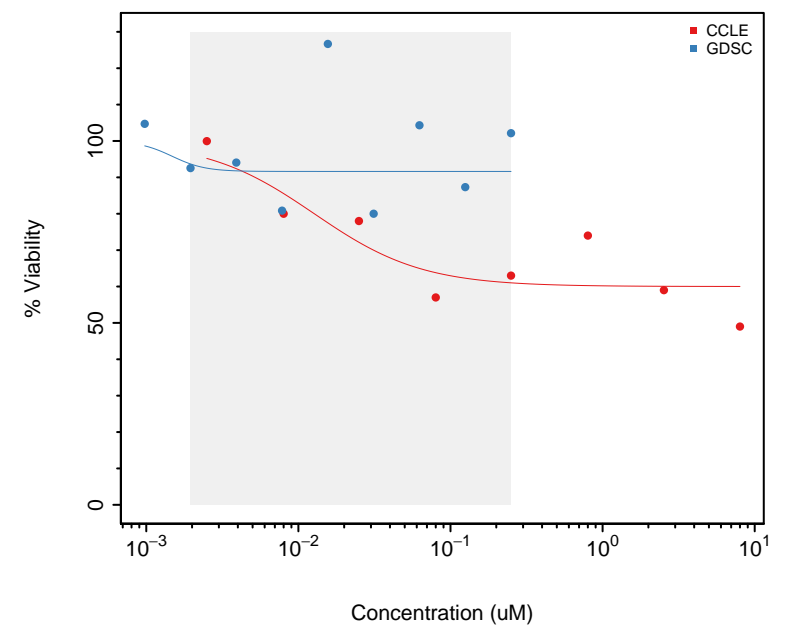

PD-0325901:HGC-27

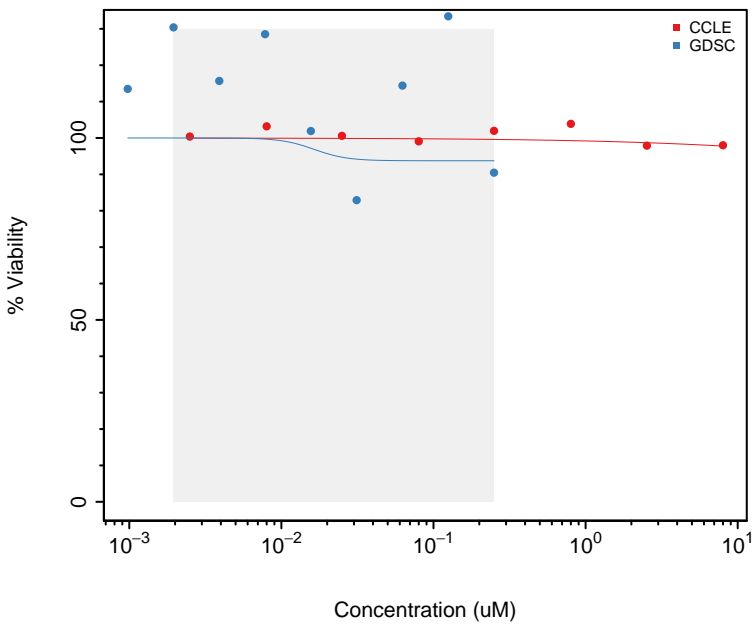

PD-0325901:HH

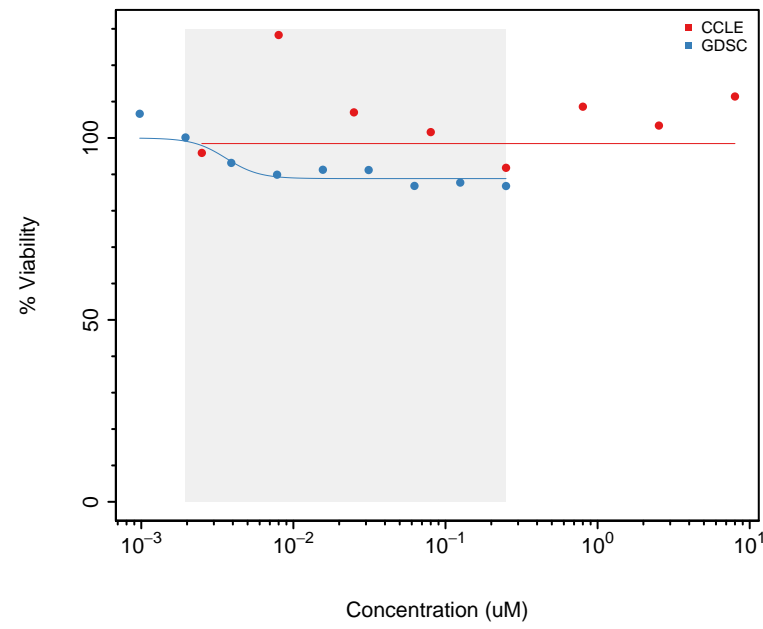

PD-0325901:HLE

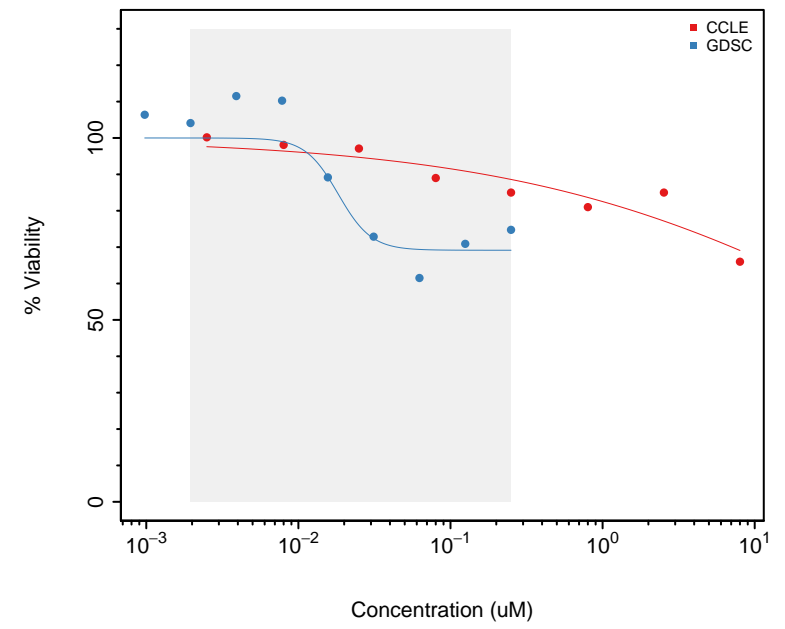

PD-0325901:HOS

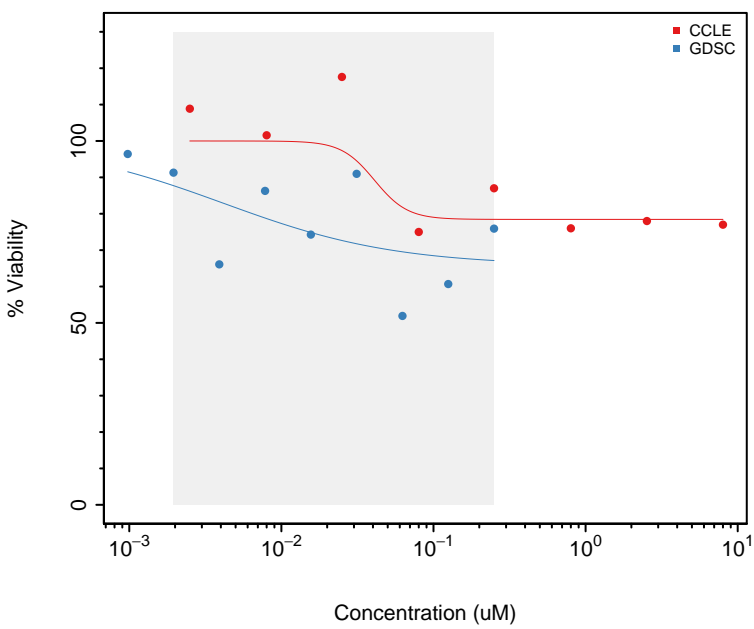

PD-0325901:HPAF-II

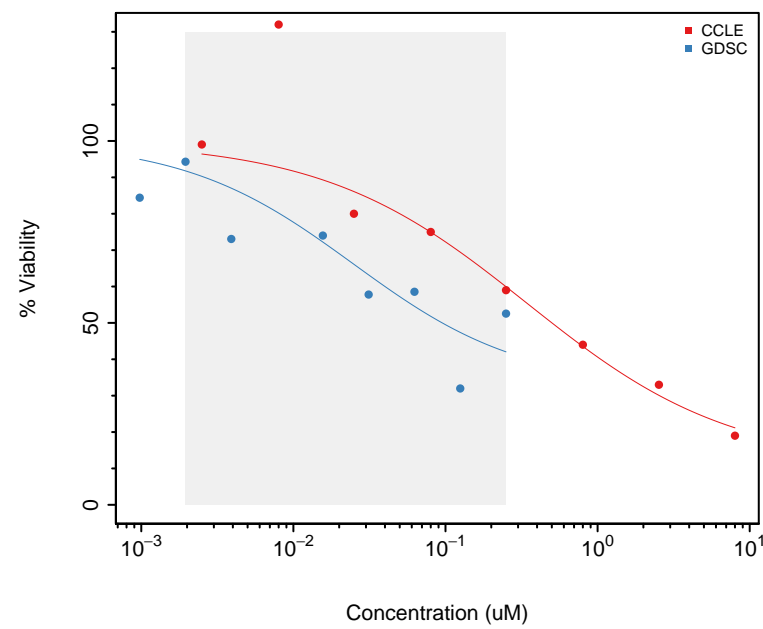

PD-0325901:Hs-578-T

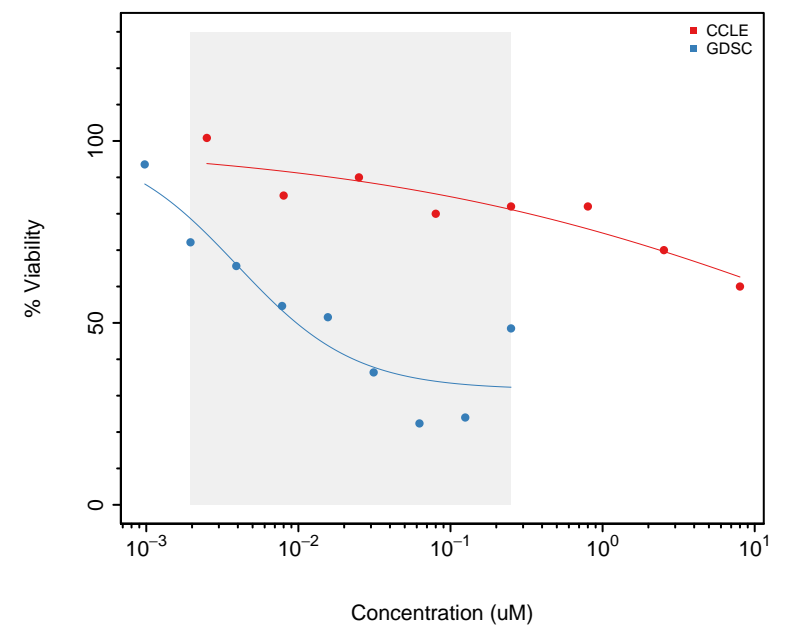

PD-0325901:HSC-2

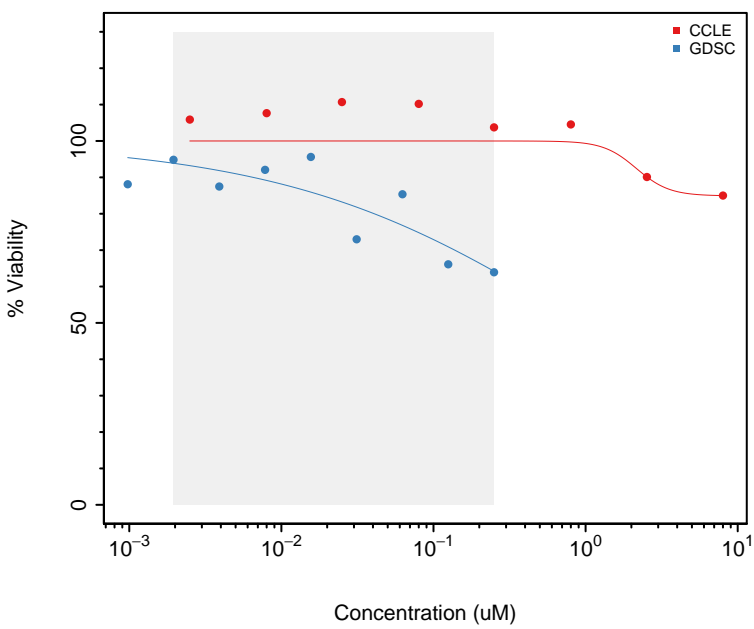

PD-0325901:HT

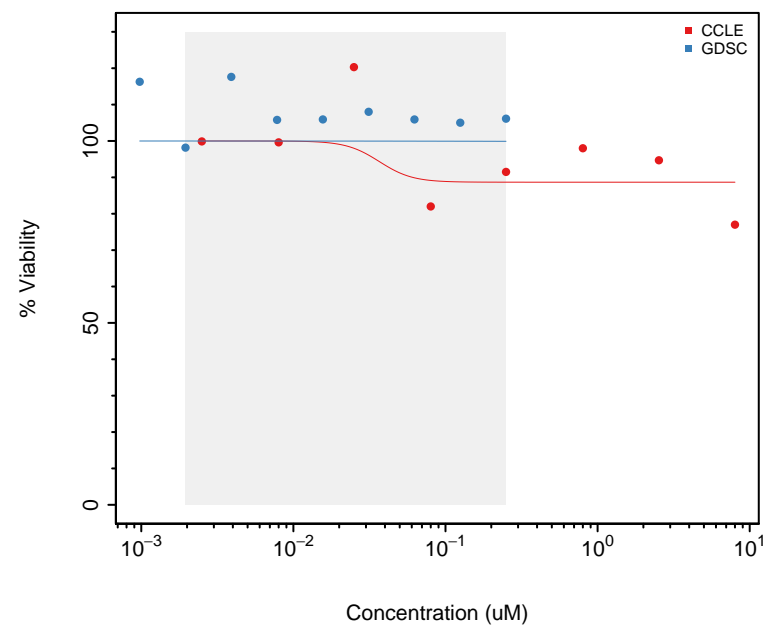

PD-0325901:HT-1080

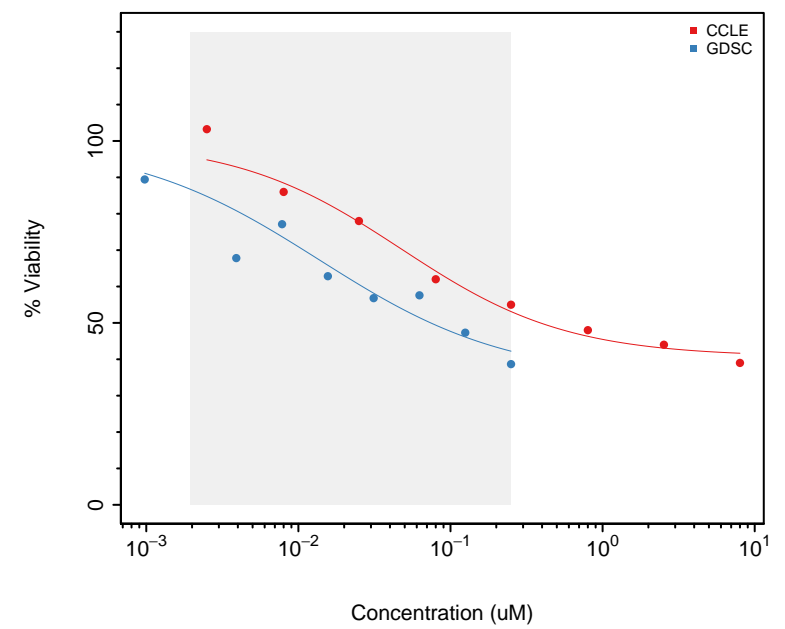

PD-0325901:HT-1197

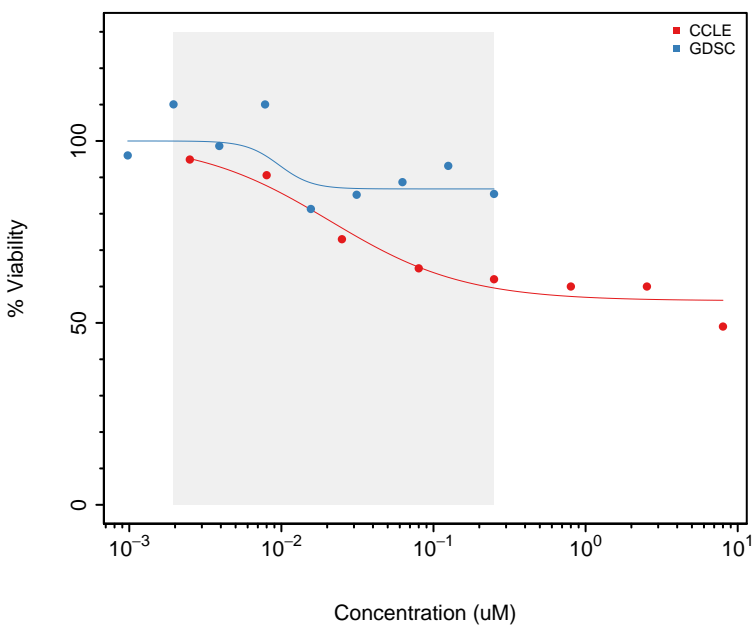

PD-0325901:HT-144

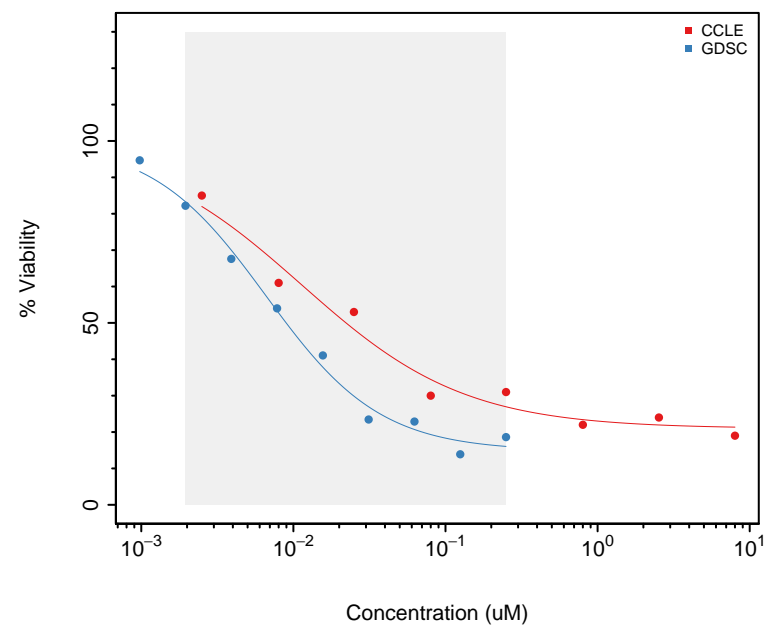

PD-0325901:HT-29

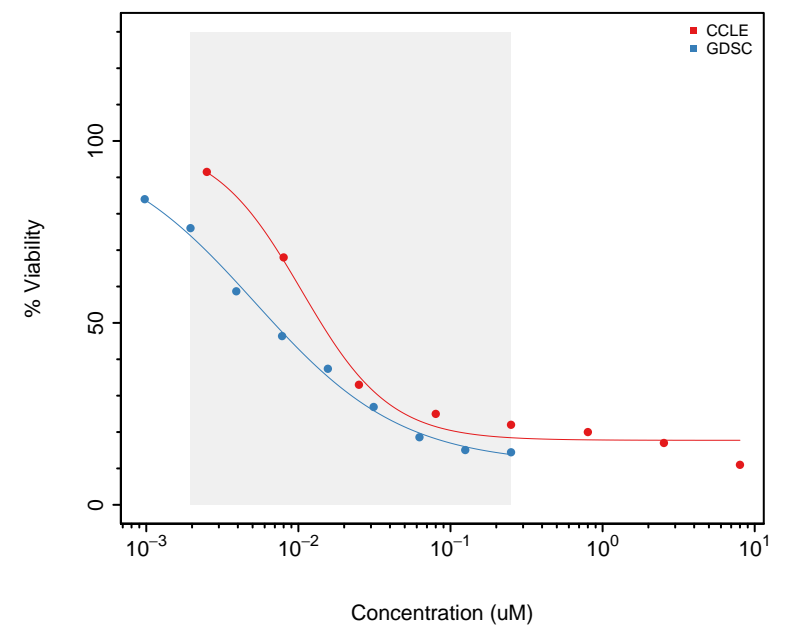

PD-0325901:HuCCT1

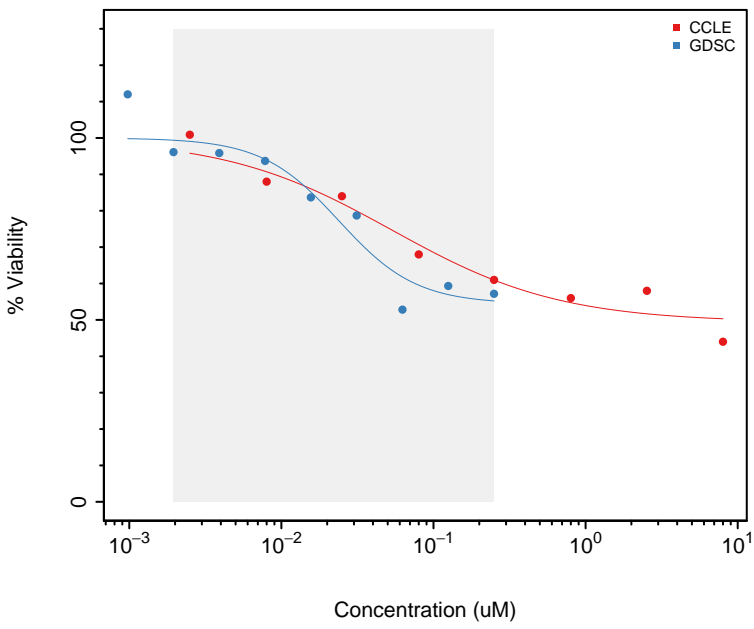

PD-0325901:HuP-T3

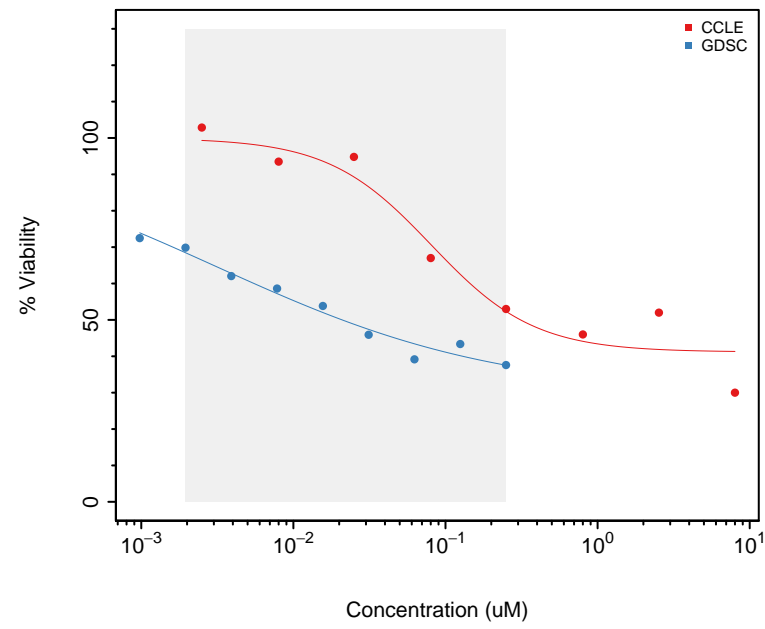

PD-0325901:HuP-T4

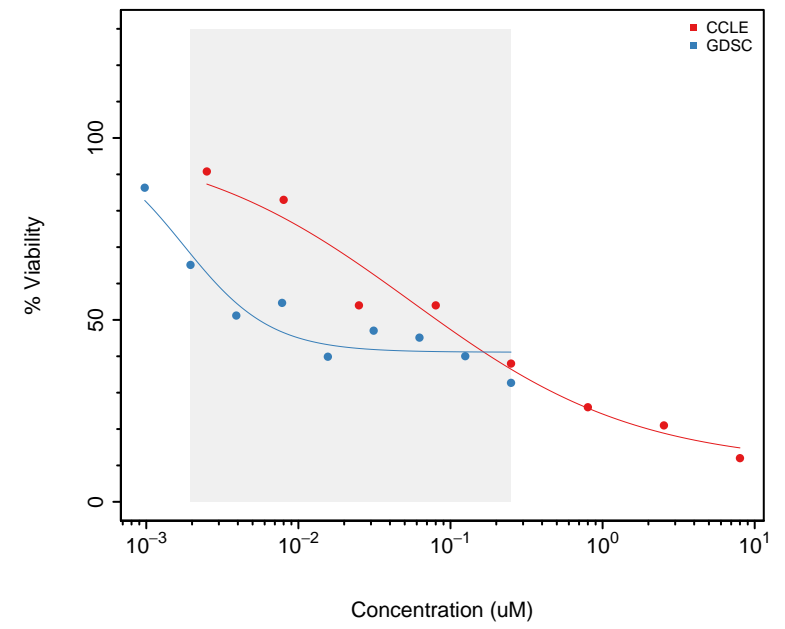

PD-0325901:IA-LM

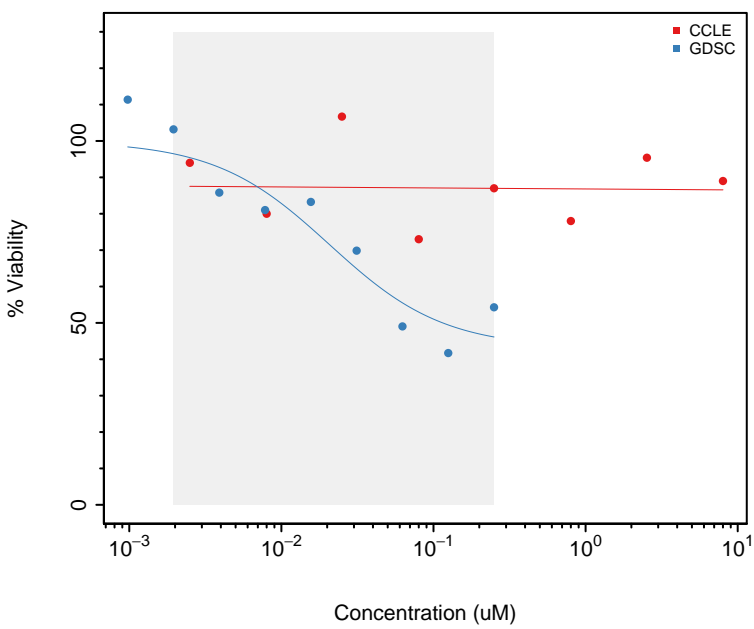

PD-0325901:IGROV-1

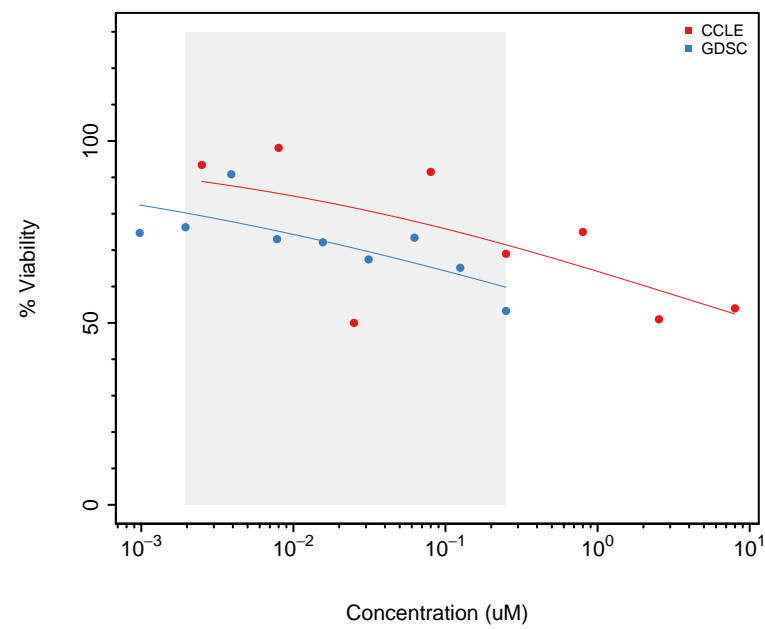

PD-0325901:IPC-298

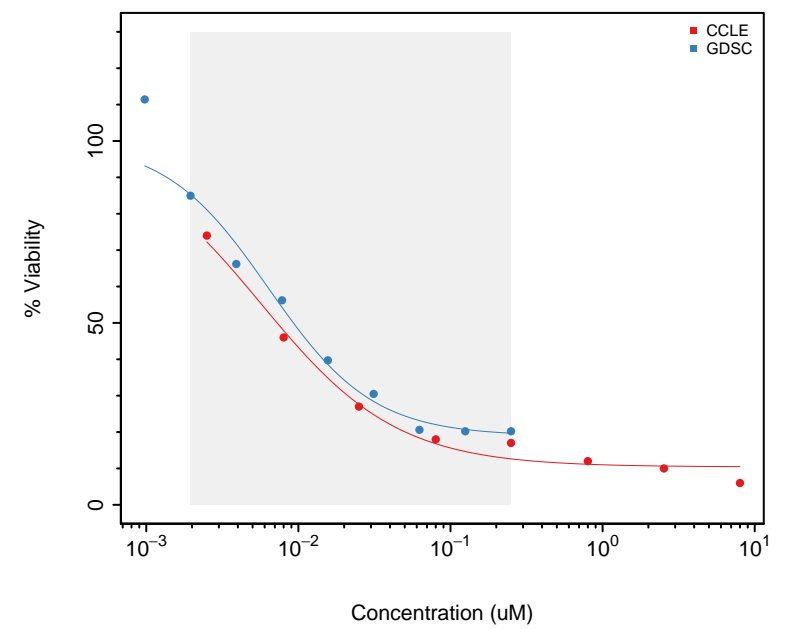

PD-0325901:IST-MES1

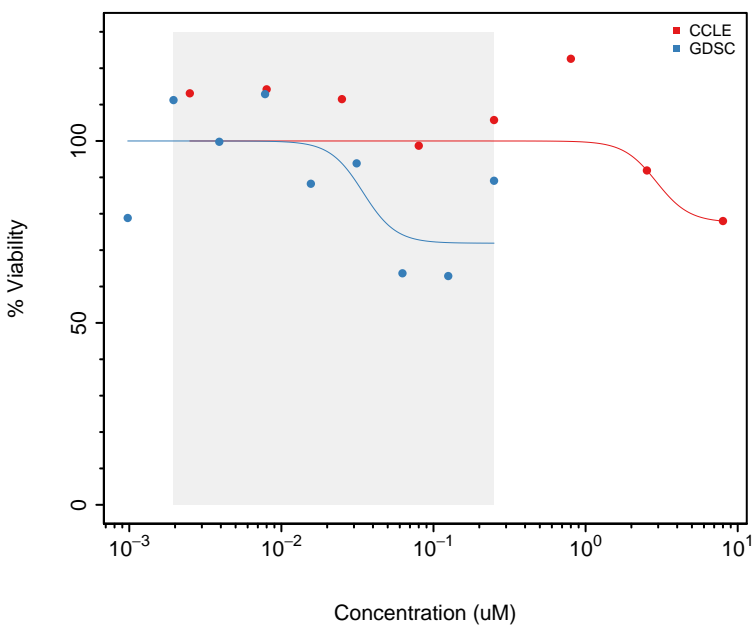

PD-0325901:J82

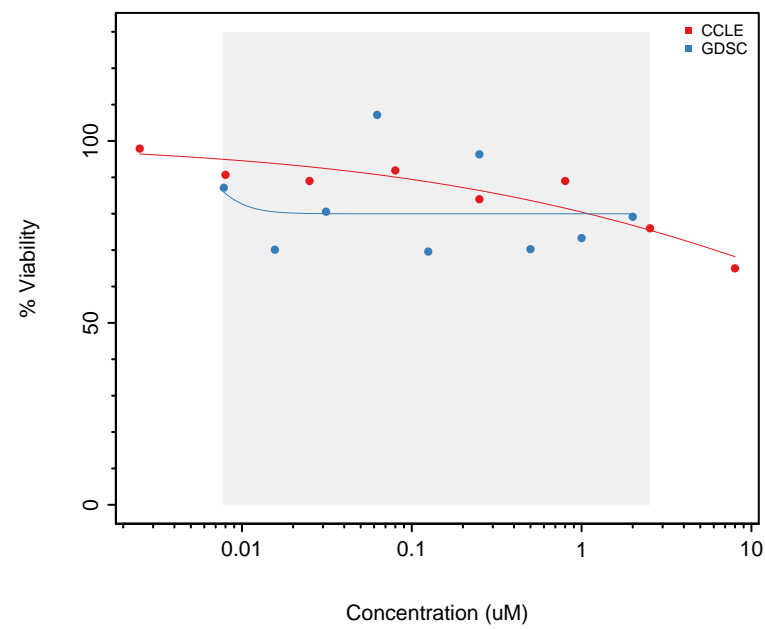

PD-0325901:JVM-3

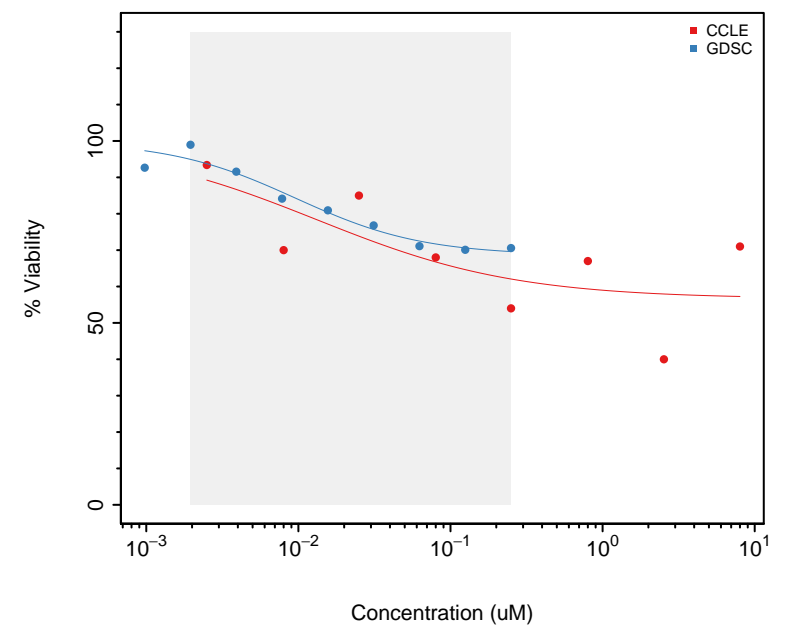





PD-0325901:MCF7

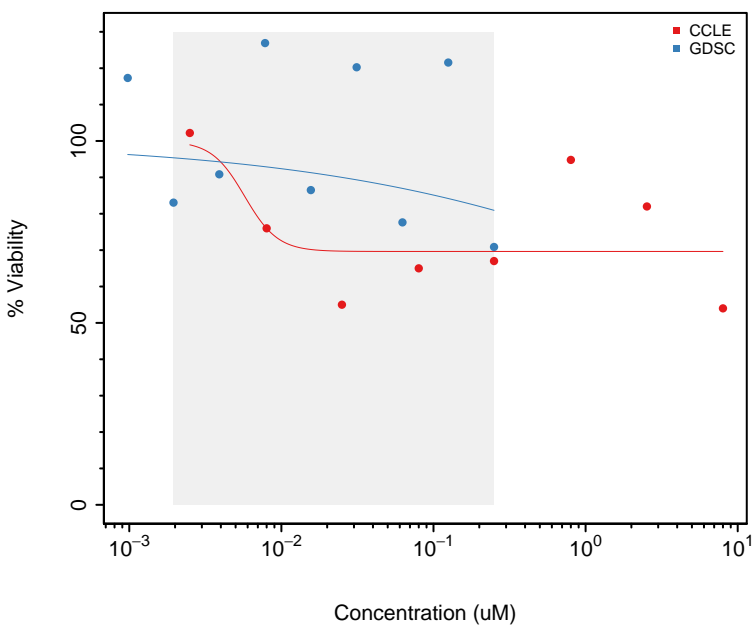

PD-0325901:MDA-MB-157

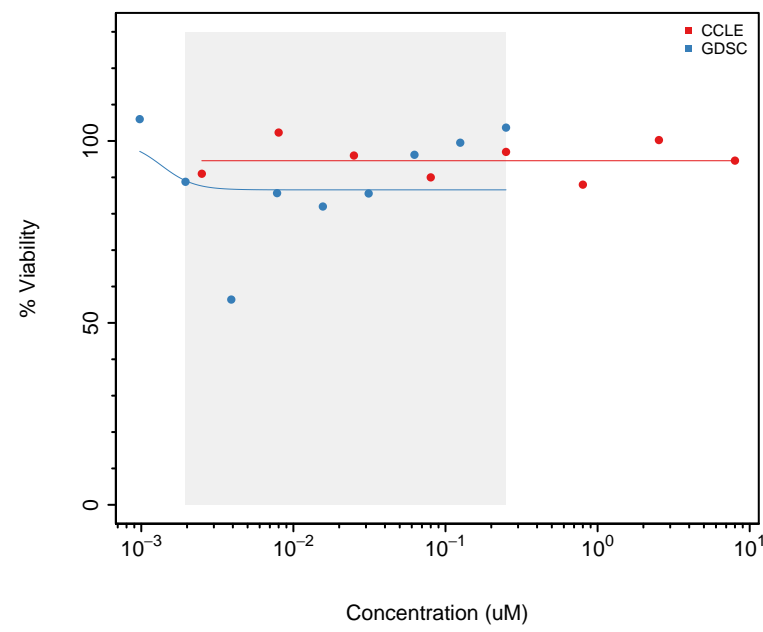

PD-0325901:MDA-MB-175-VII

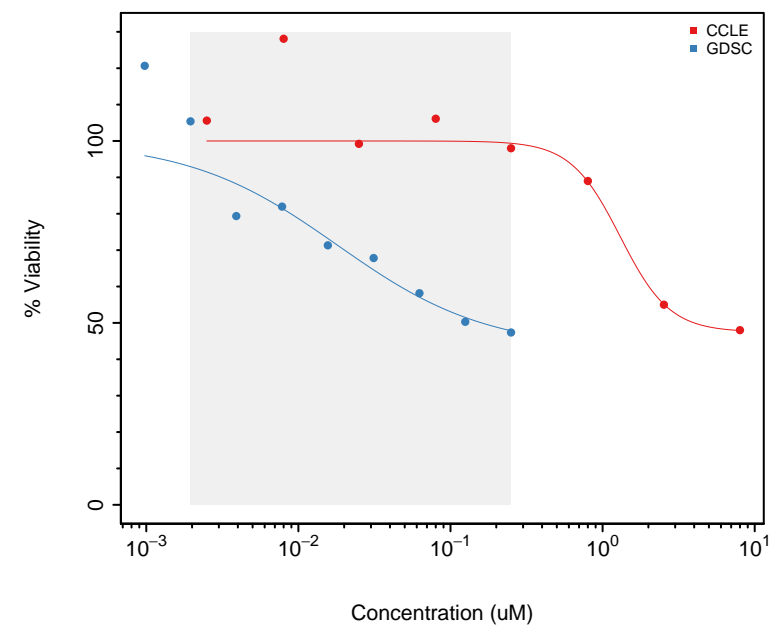

PD-0325901:MDA-MB-415

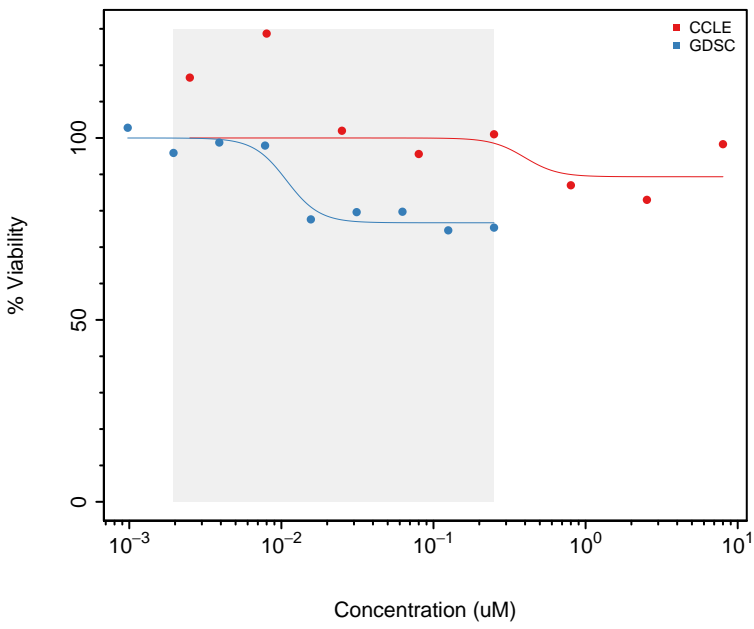

PD-0325901:MDA-MB-453

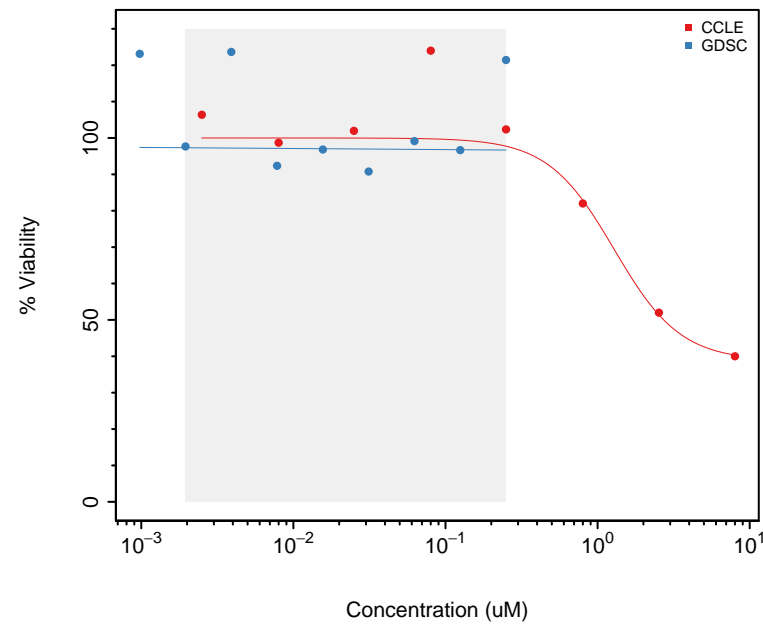

PD-0325901:MDA-MB-468

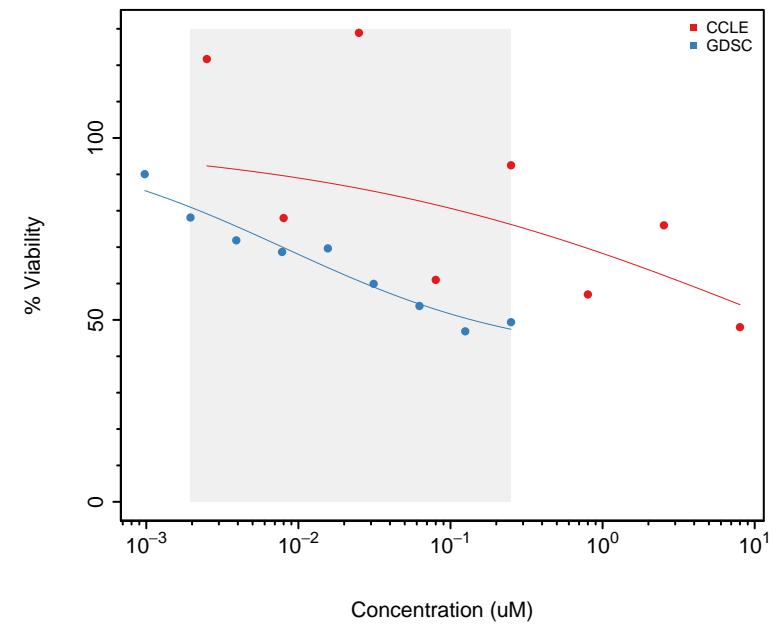

PD-0325901:MEG-01

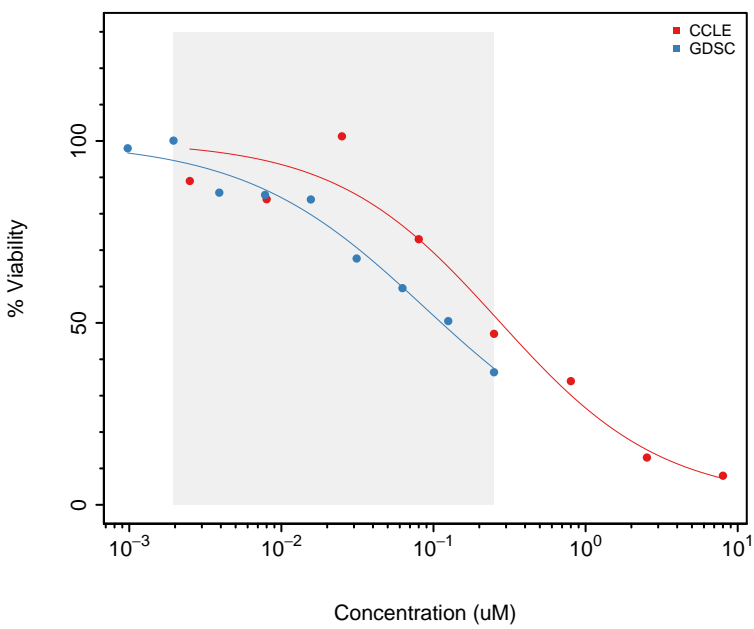

PD-0325901:MEL-HO

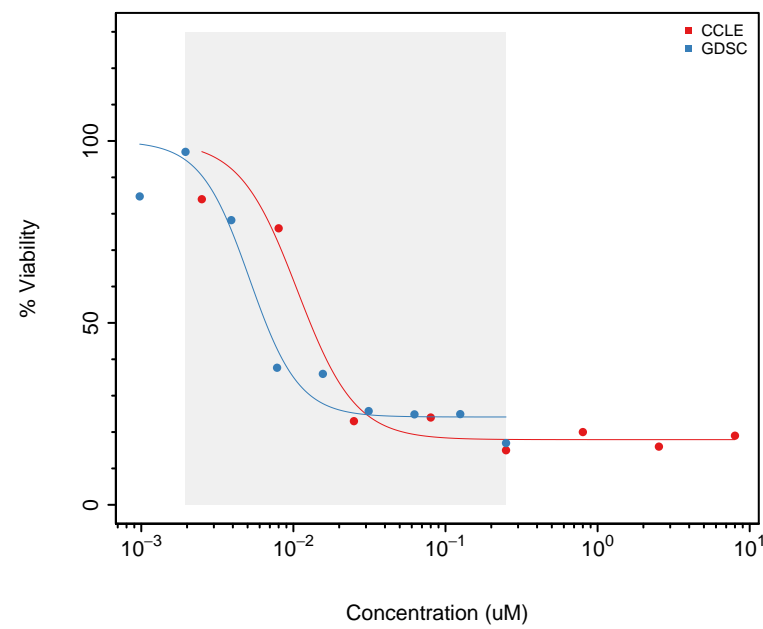

PD-0325901:Mewo

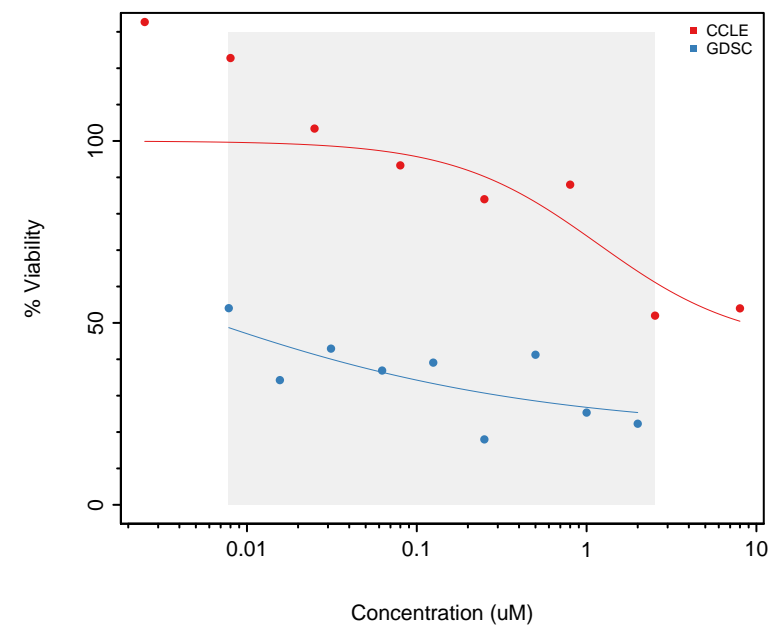

PD-0325901:MFE-280

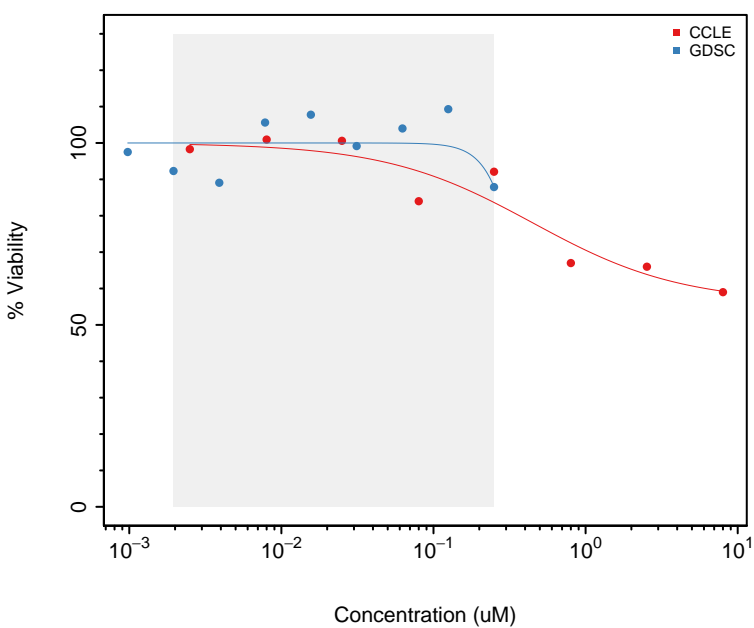

PD-0325901:MFE-296

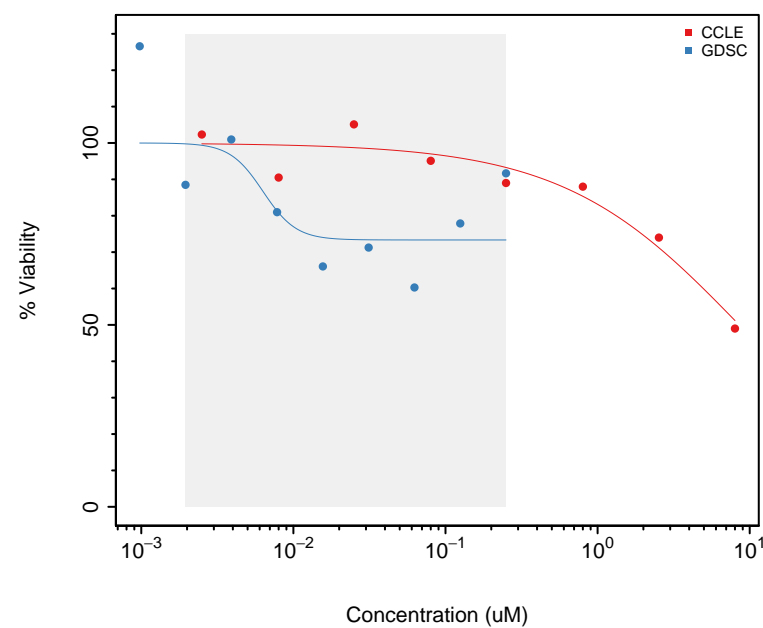

PD-0325901:MG-63

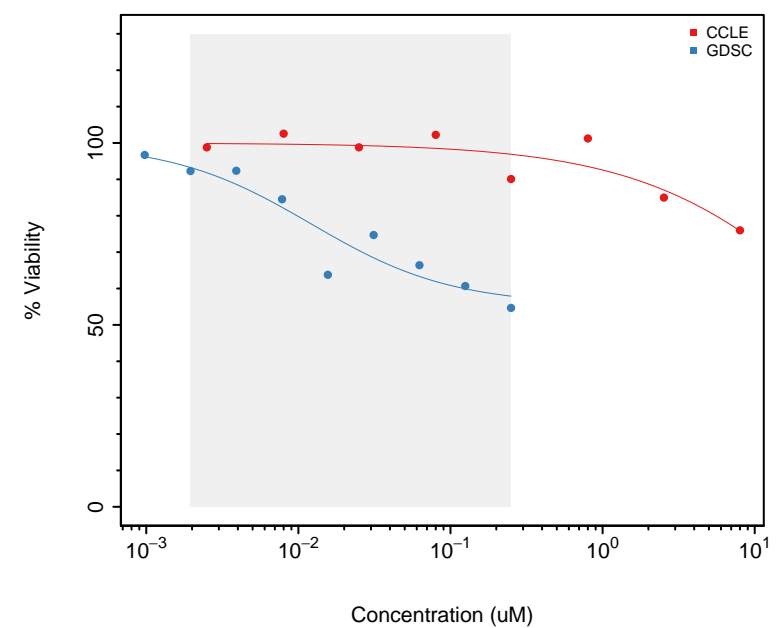

PD-0325901:MHH-ES-1

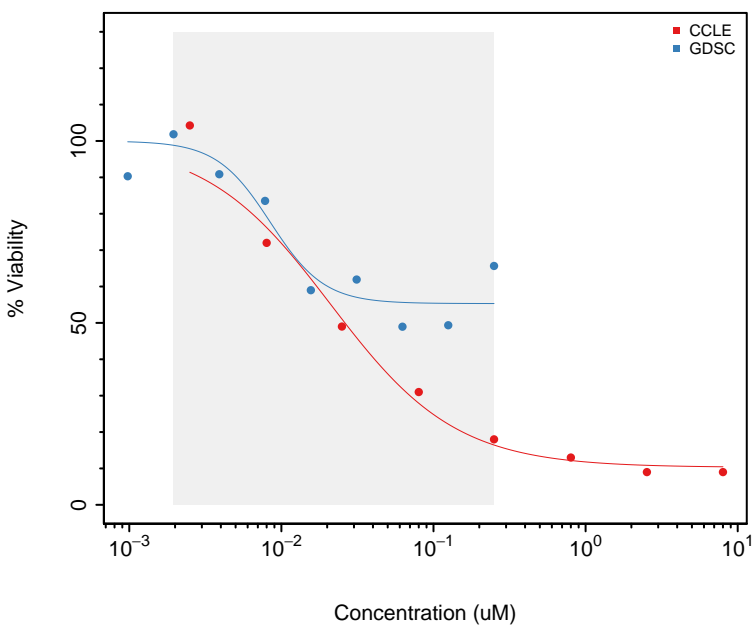

PD-0325901:MIA-PaCa-2

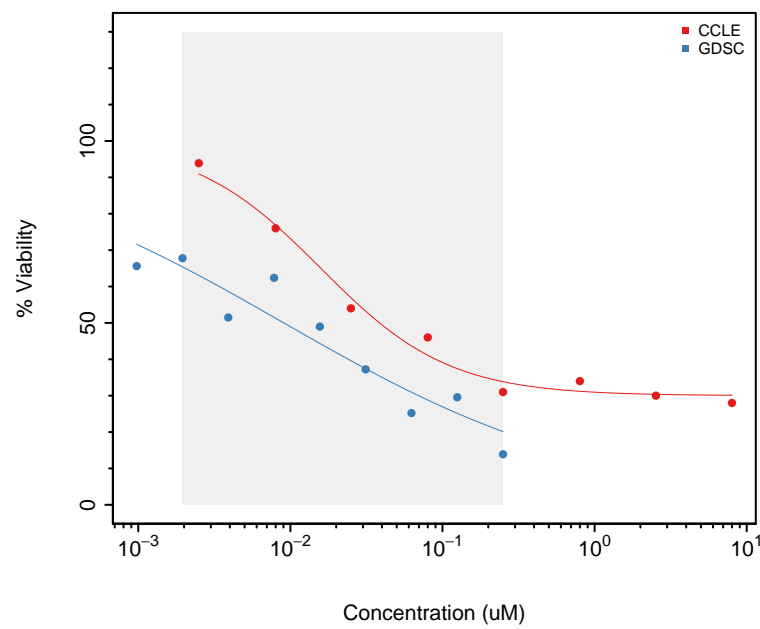

PD-0325901:MKN7

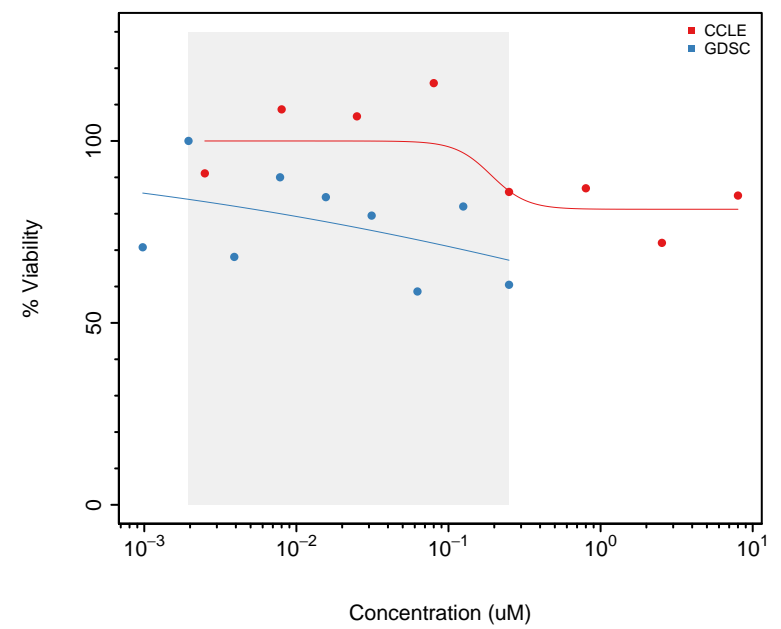

PD-0325901:MOLT-16

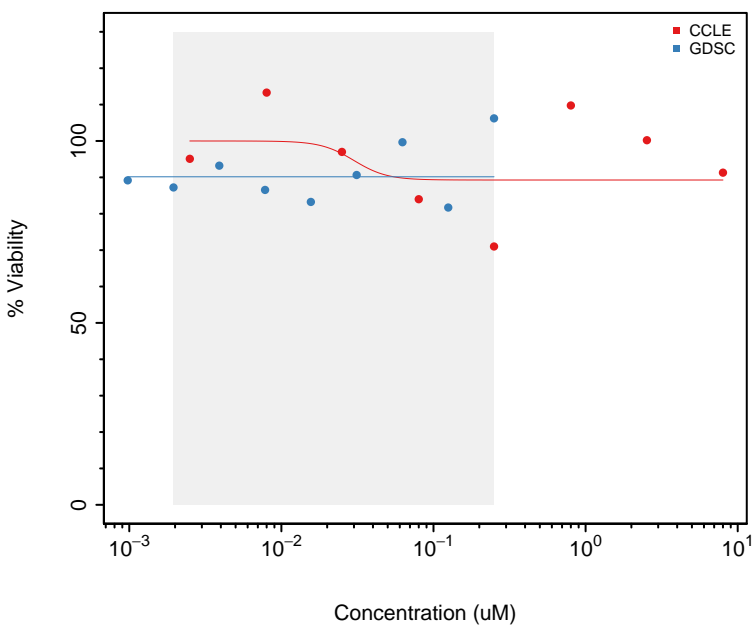

PD-0325901:MPP-89

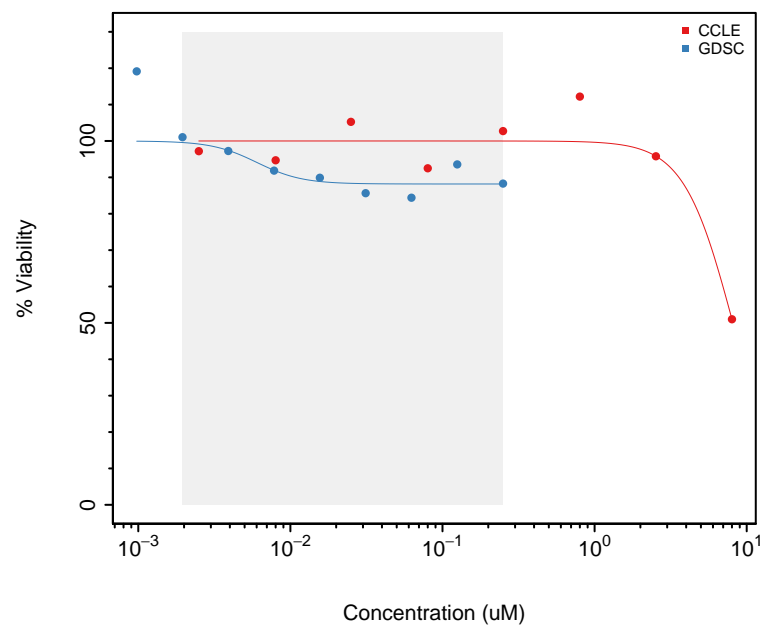

PD-0325901:MSTO-211H

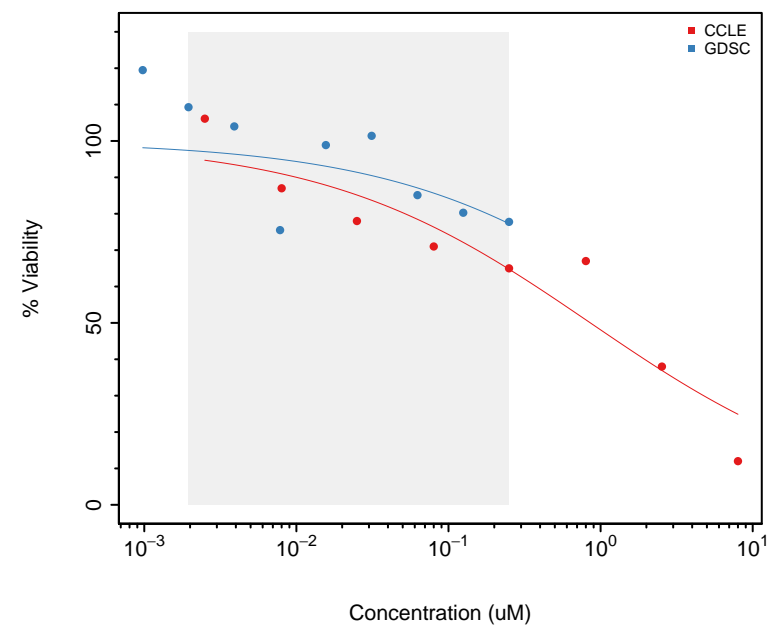

PD-0325901:NCI-H1048

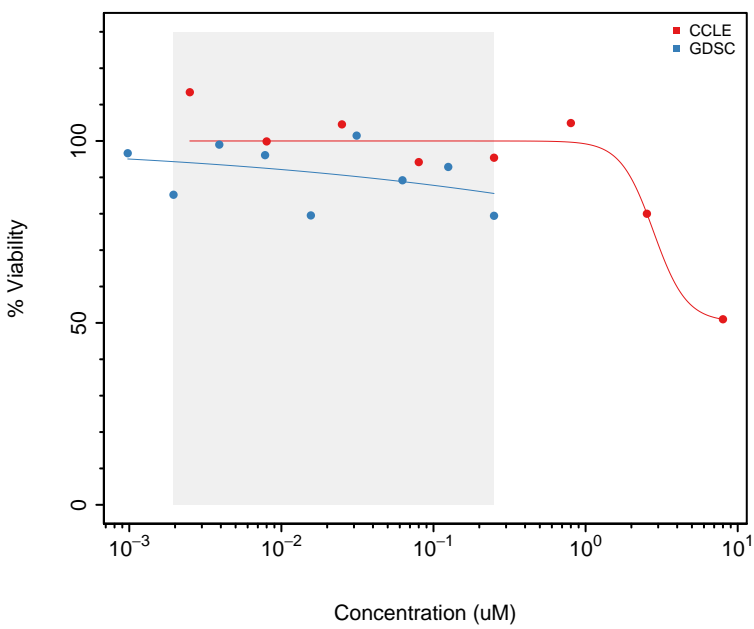

PD-0325901:NCI-H1092

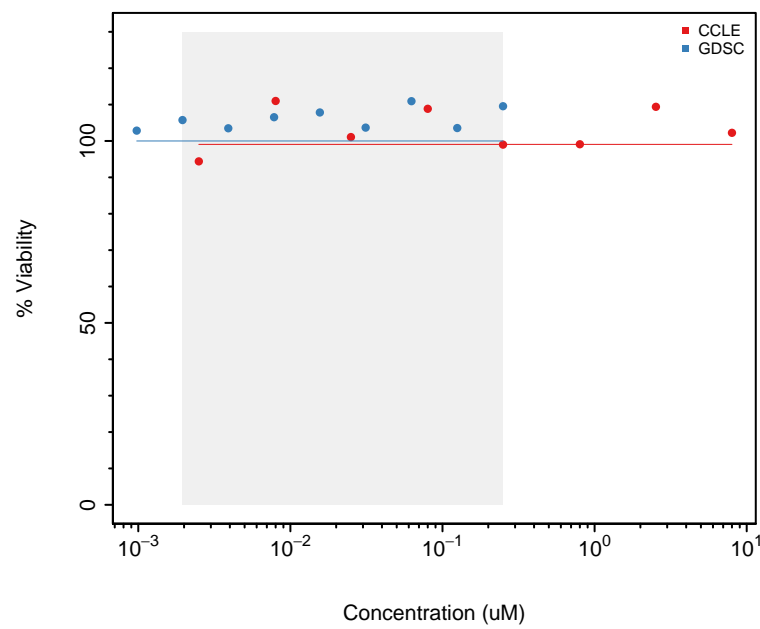

PD-0325901:NCI-H1155

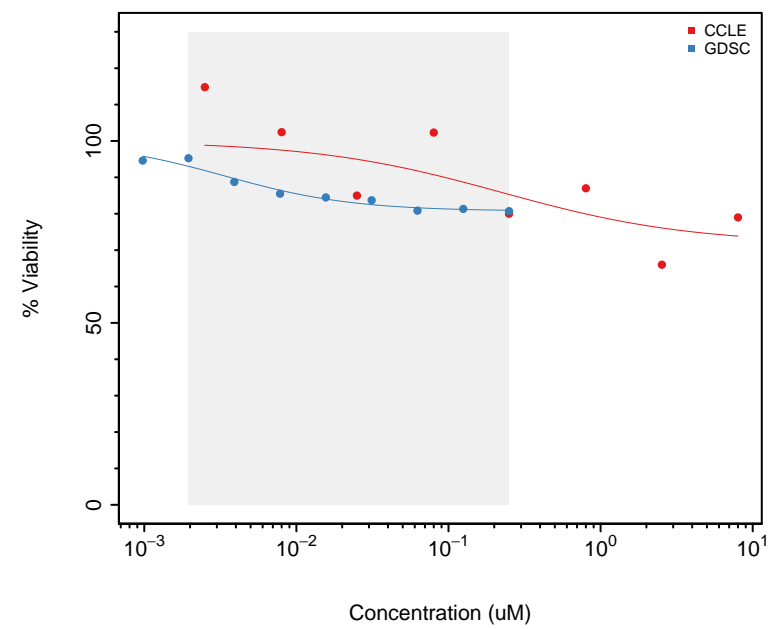

PD-0325901:NCI-H1299

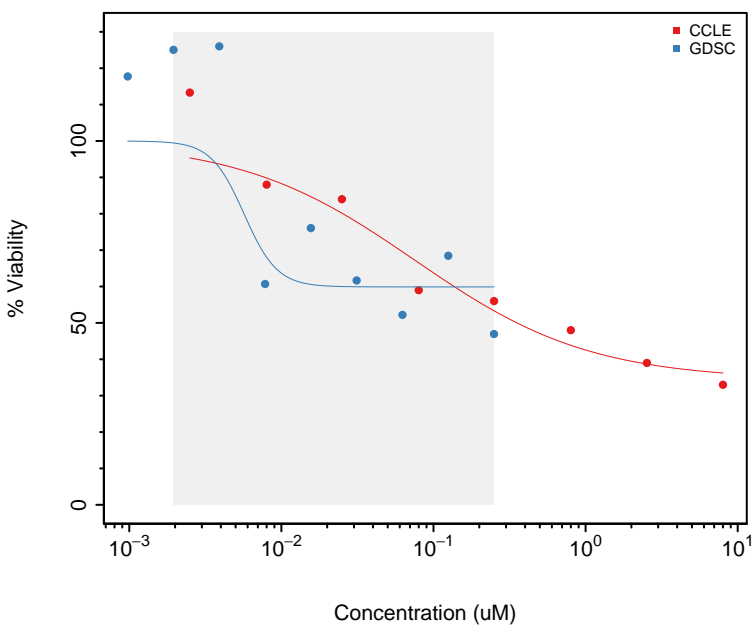

PD-0325901:NCI-H1563

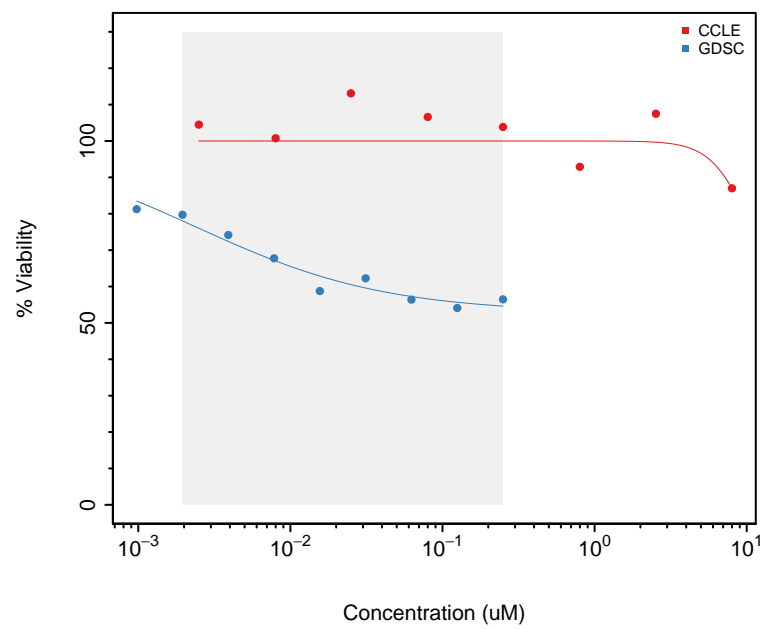

PD-0325901:NCI-H1648

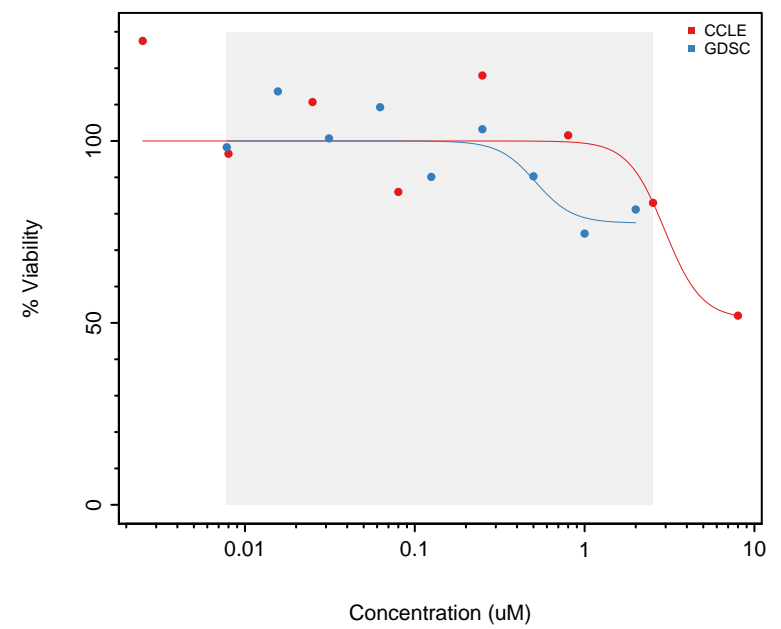

PD-0325901:NCI-H1650

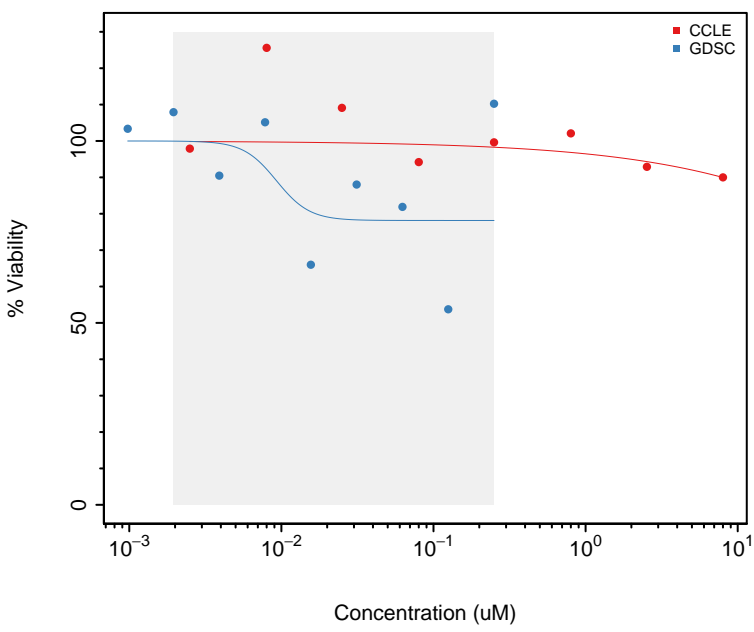

PD-0325901:NCI-H1651

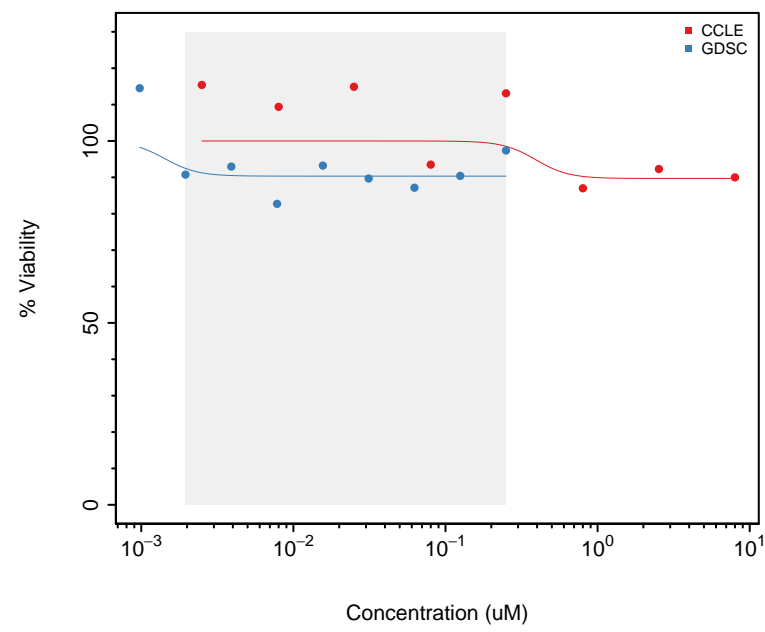

PD-0325901:NCI-H1666

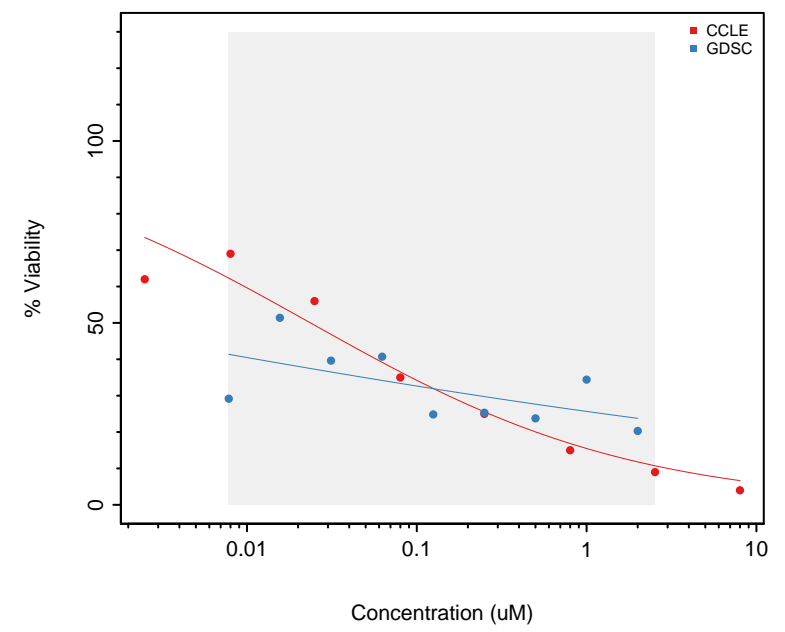

PD-0325901:NCI-H1694

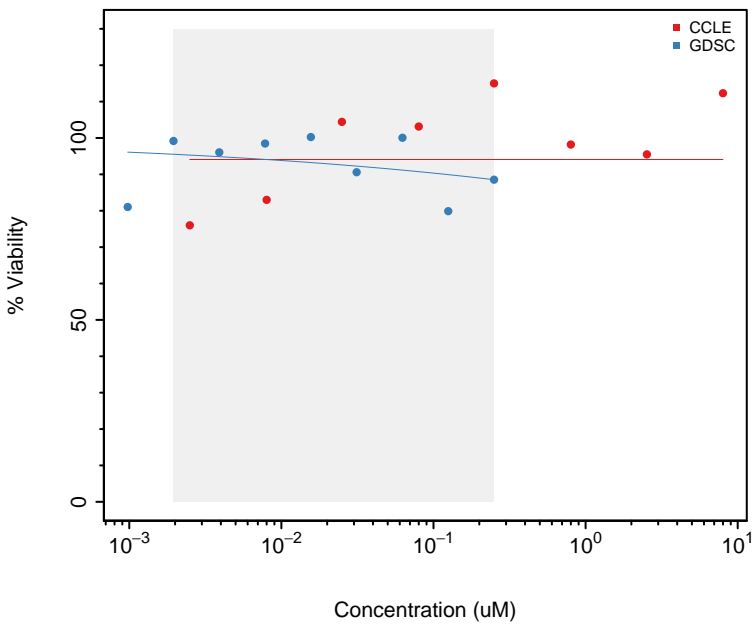

PD-0325901:NCI-H1703

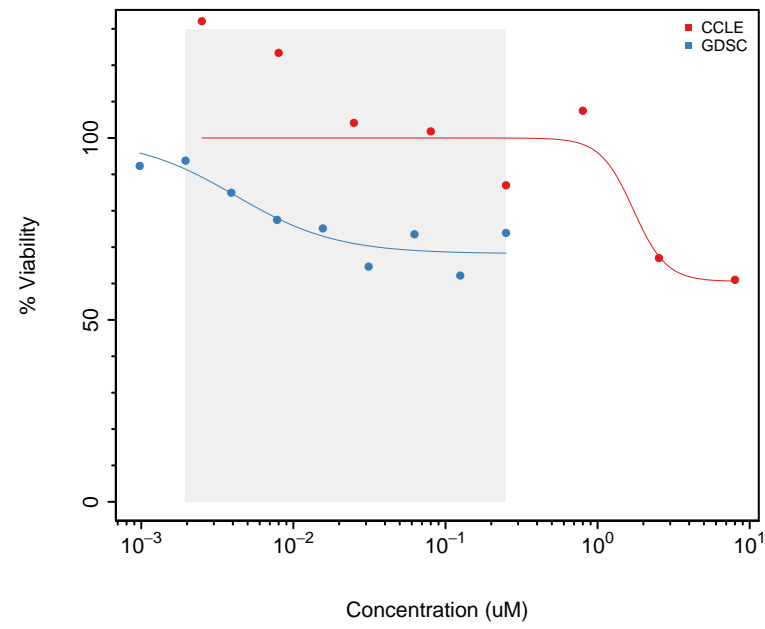

PD-0325901:NCI-H1792

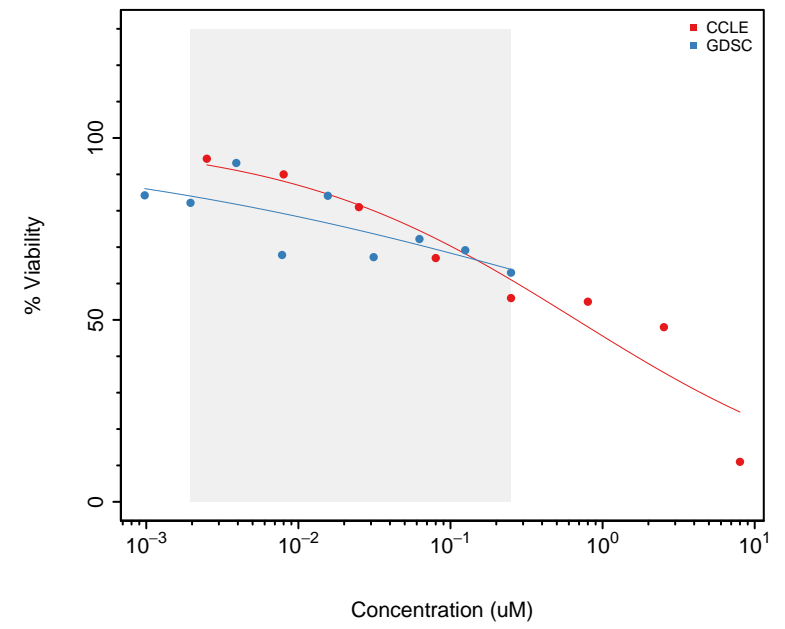

PD-0325901:NCI-H1793

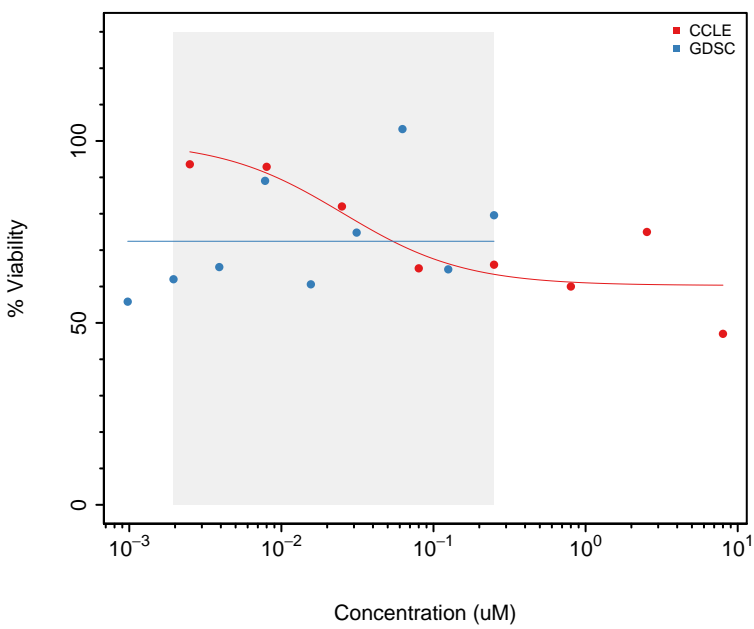

PD-0325901:NCI-H1975

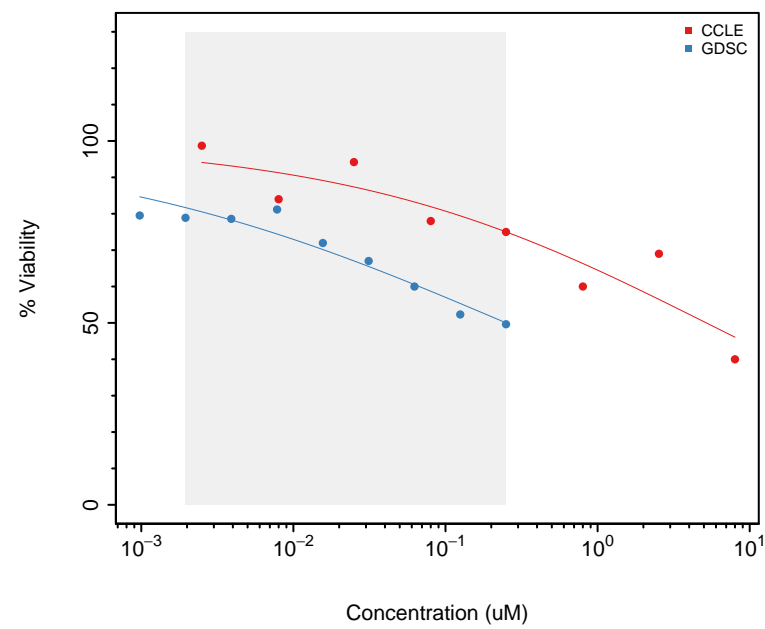

PD-0325901:NCI-H2009

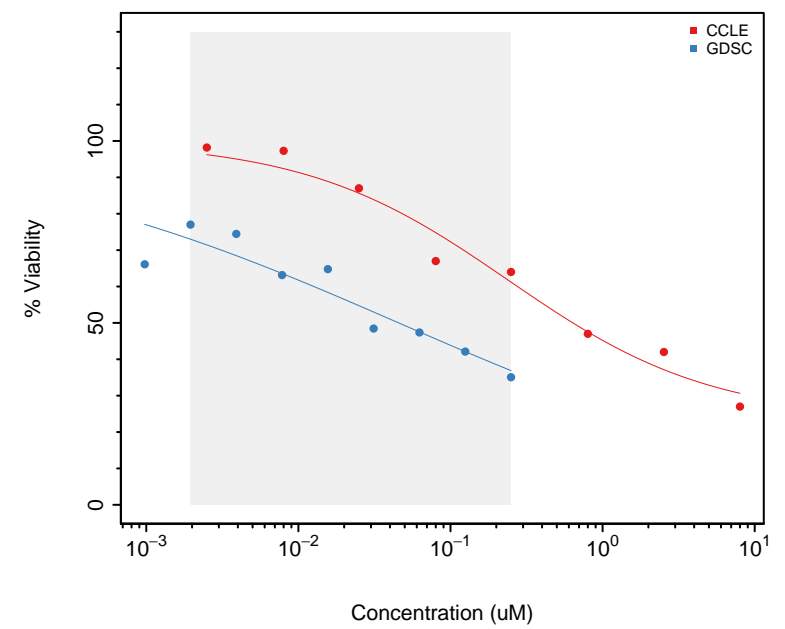

PD-0325901:NCI-H2030

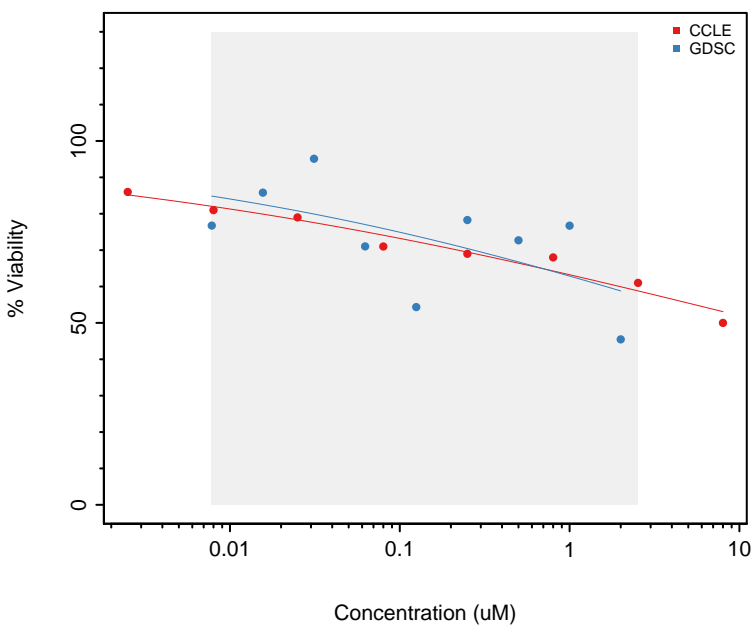

PD-0325901:NCI-H2052

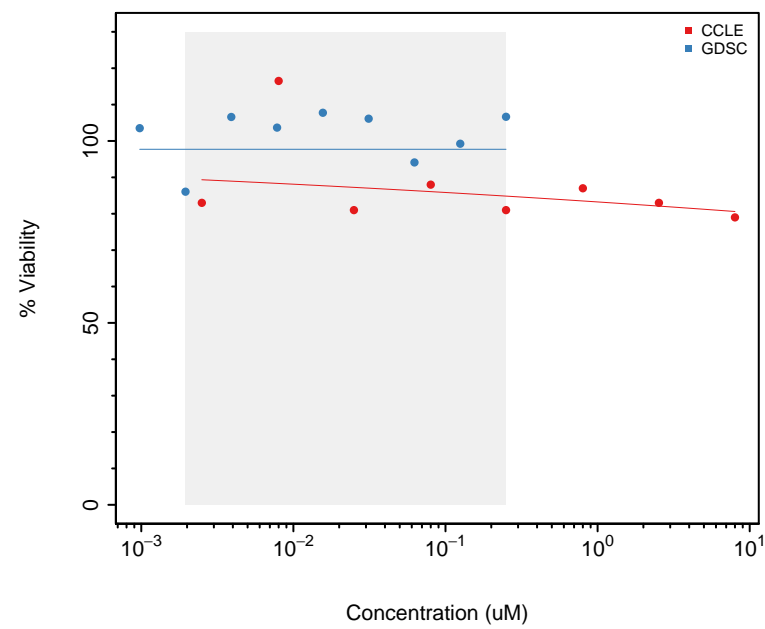

PD-0325901:NCI-H2087

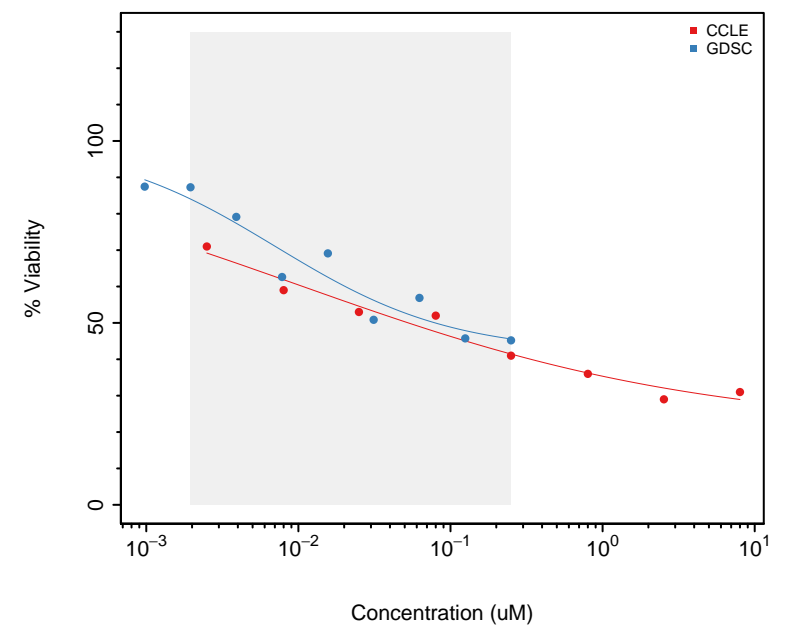





PD-0325901:NCI-H747

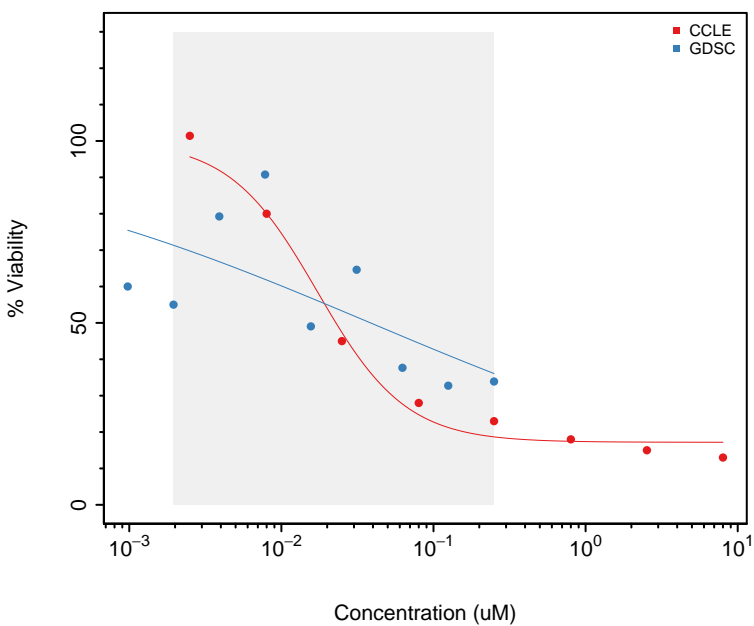

PD-0325901:NCI-H810

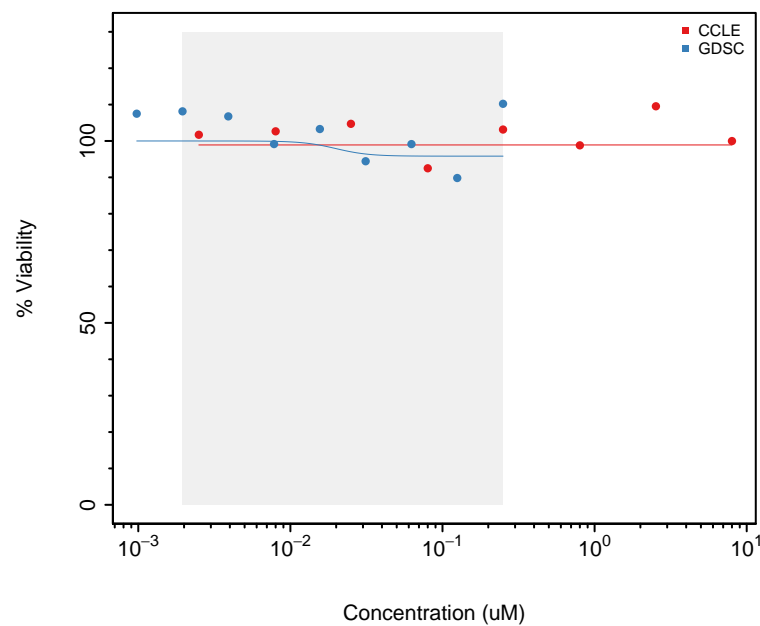

PD-0325901:NCI-N87

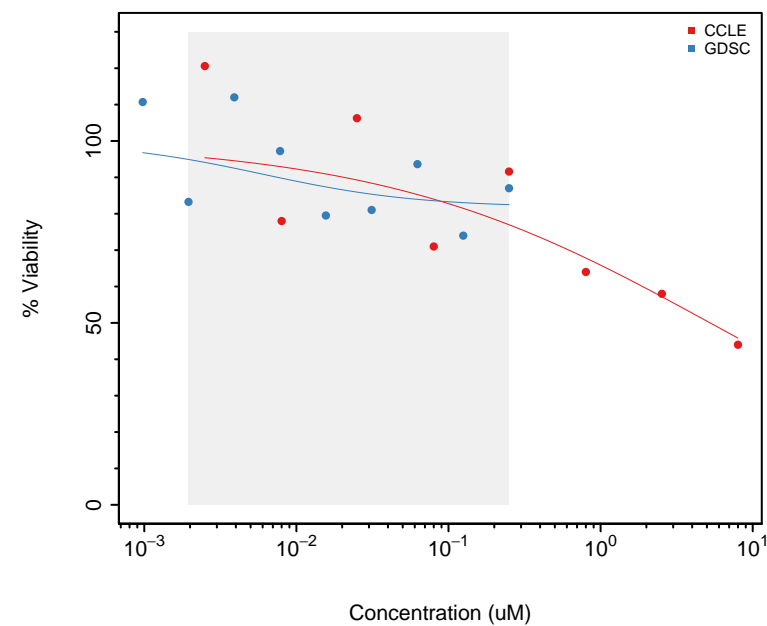

PD-0325901:OVCAR-3

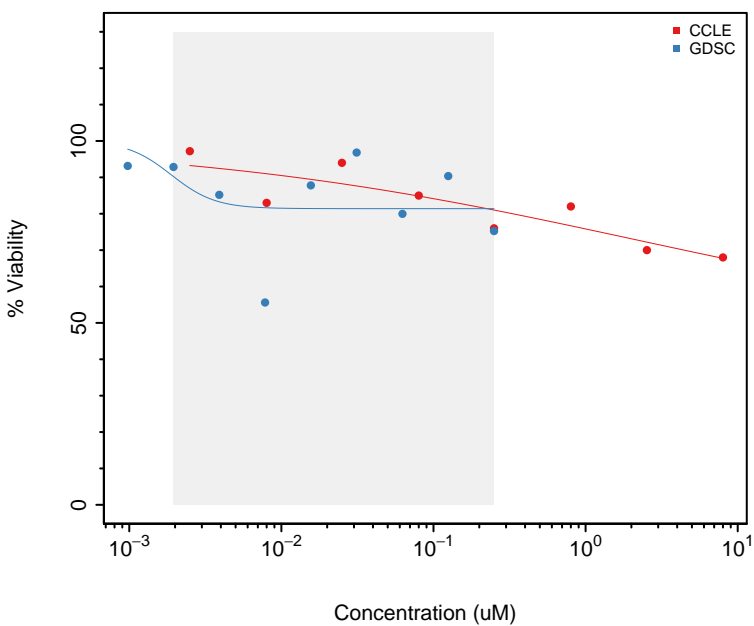

PD-0325901:NUGC-3

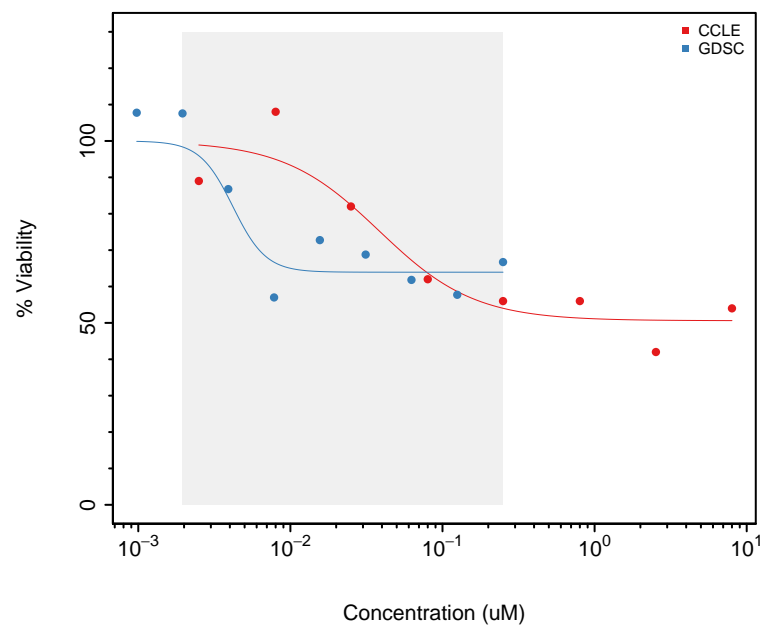

PD-0325901:OC-314

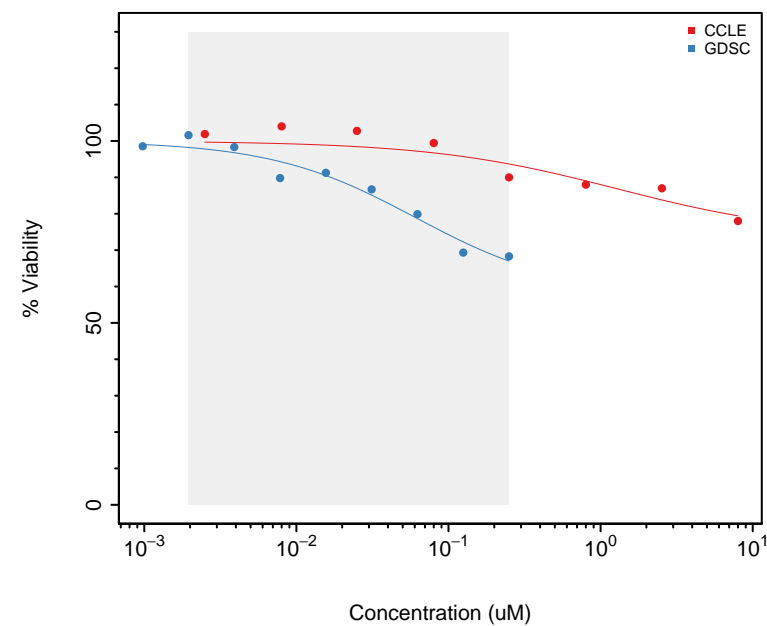

PD-0325901:OCI-AML2

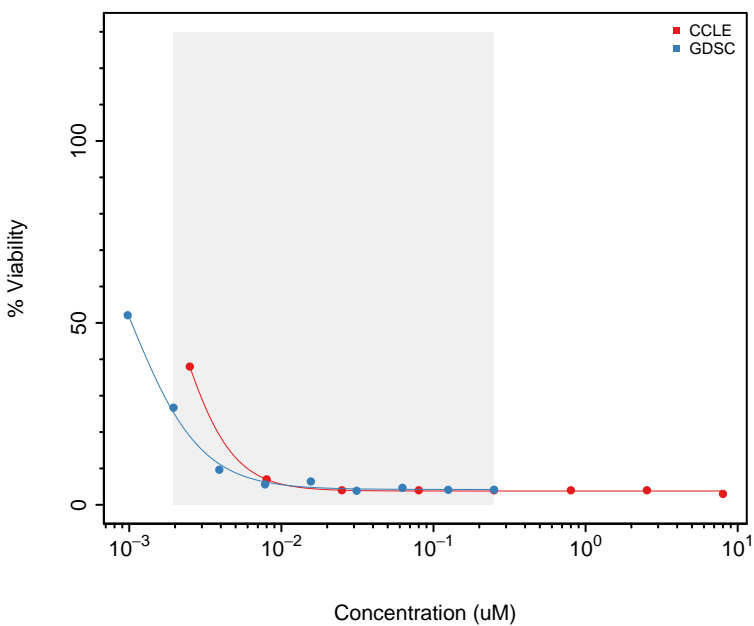

PD-0325901:OE33

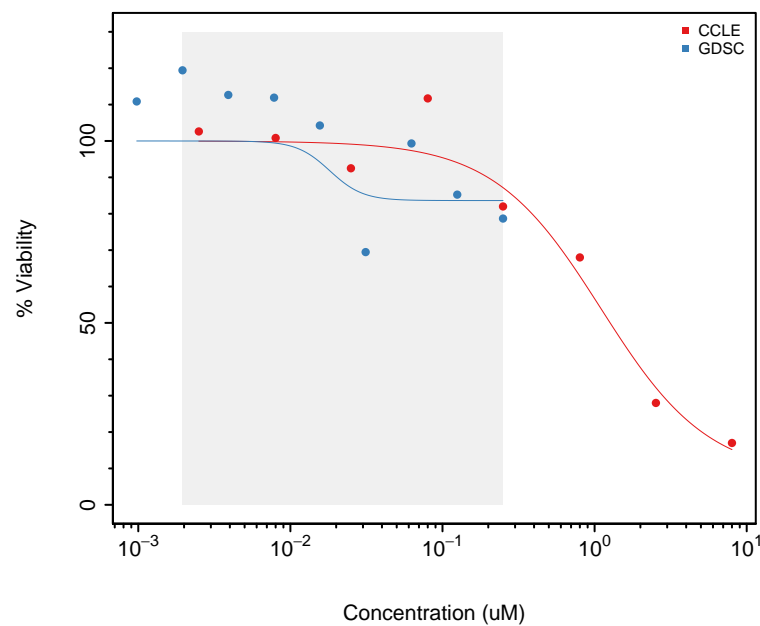

PD-0325901:ONS-76

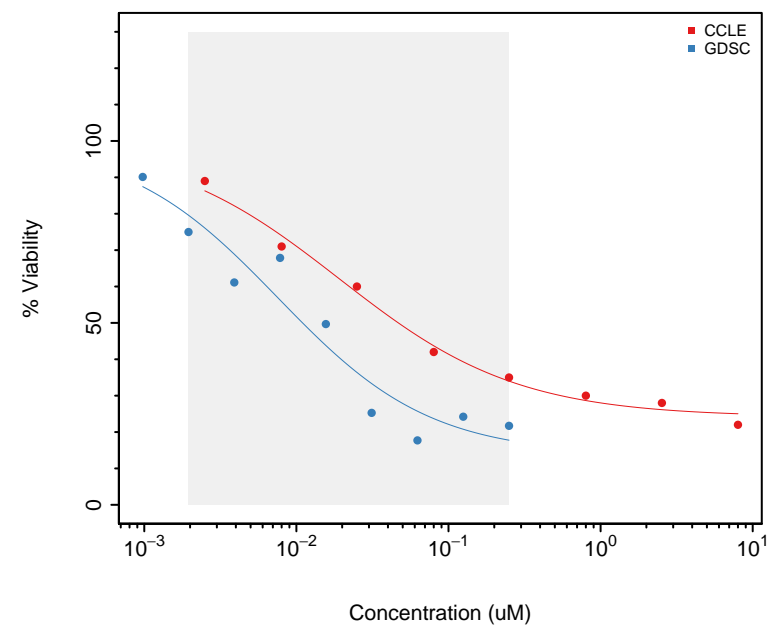

PD-0325901:OPM-2

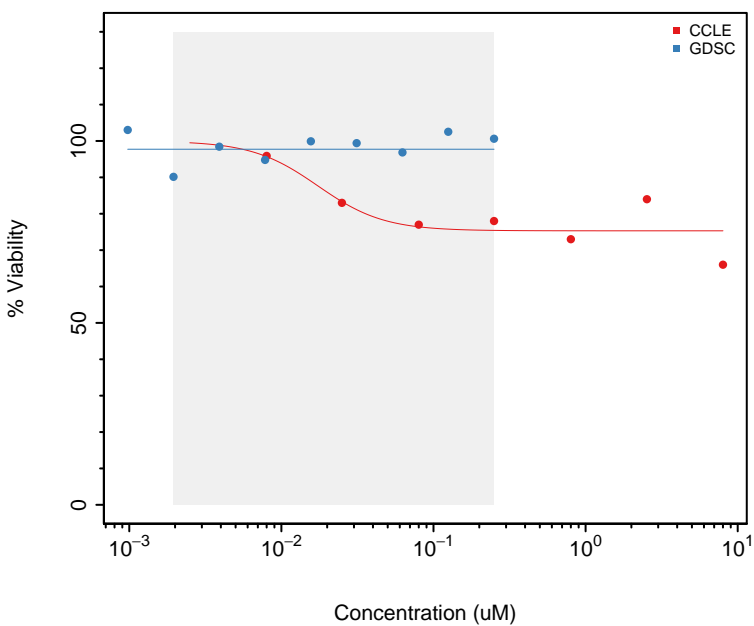

PD-0325901:OVCAR-4

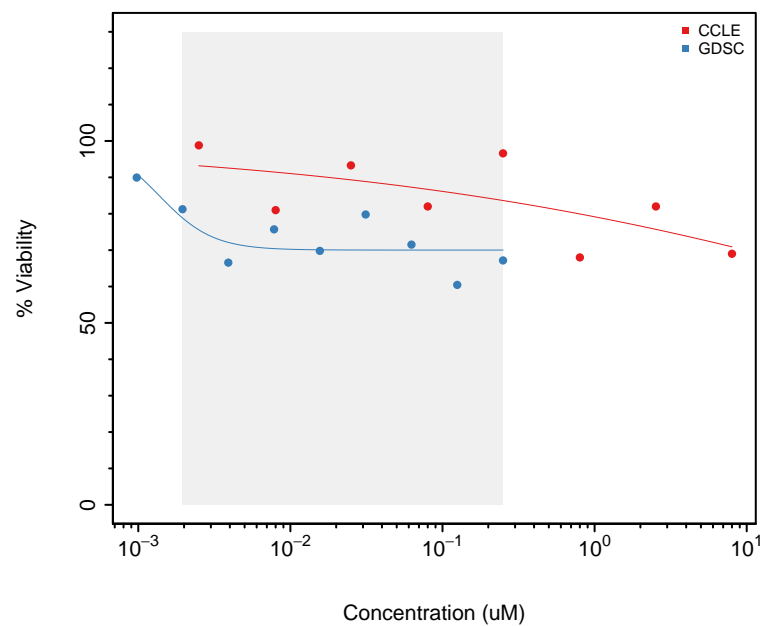

PD-0325901:OVCAR-8

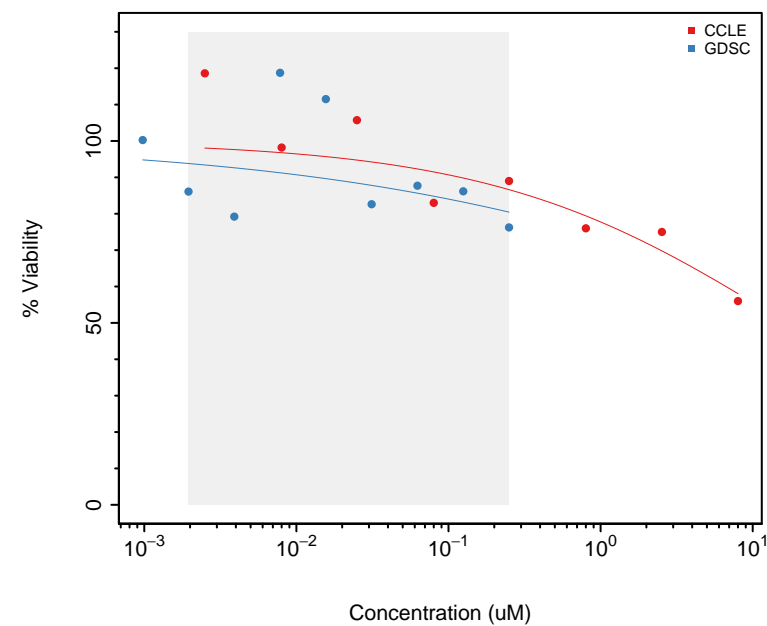

PD-0325901:P12-ICHIKAWA

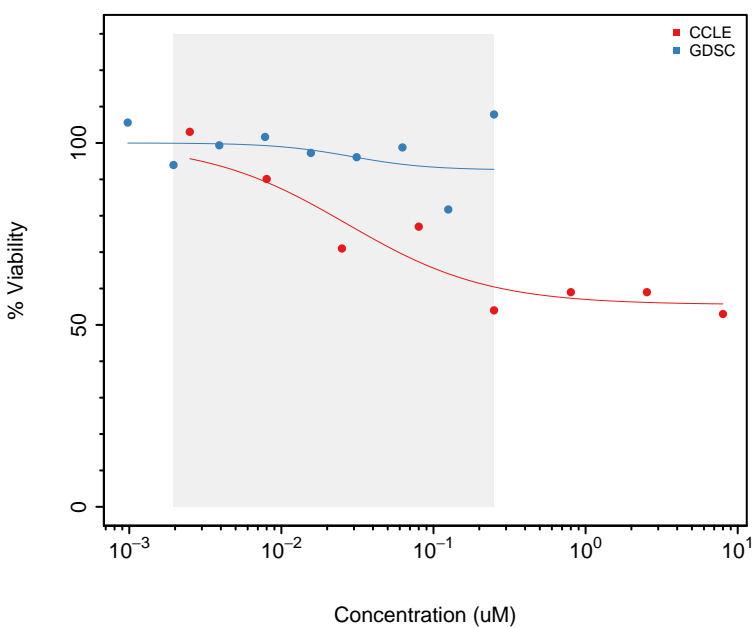

PD-0325901:P31-FUJ

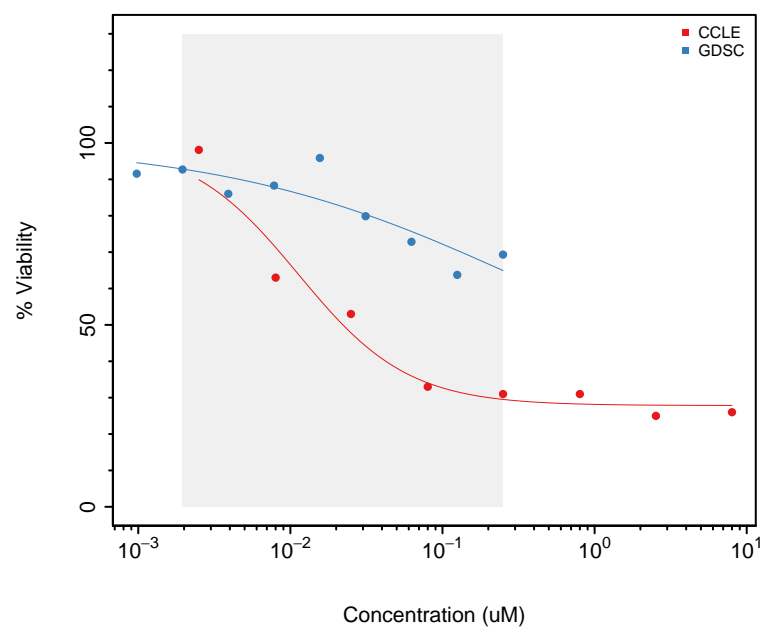

PD-0325901:Panc 03.27

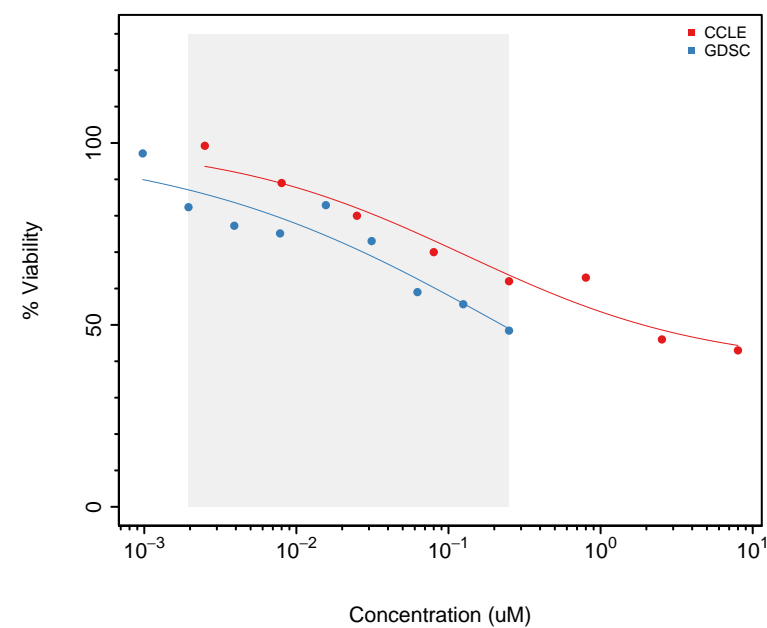

PD-0325901:Panc 10.05

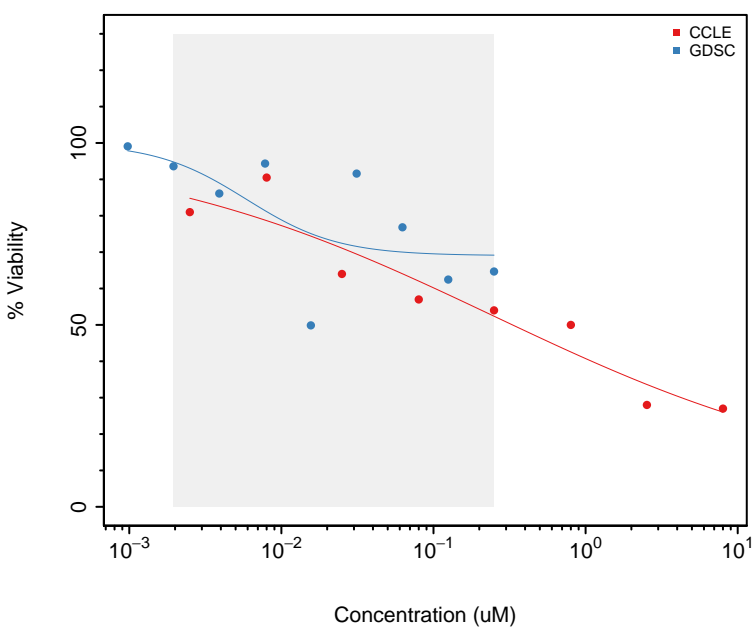

PD-0325901:PC-14

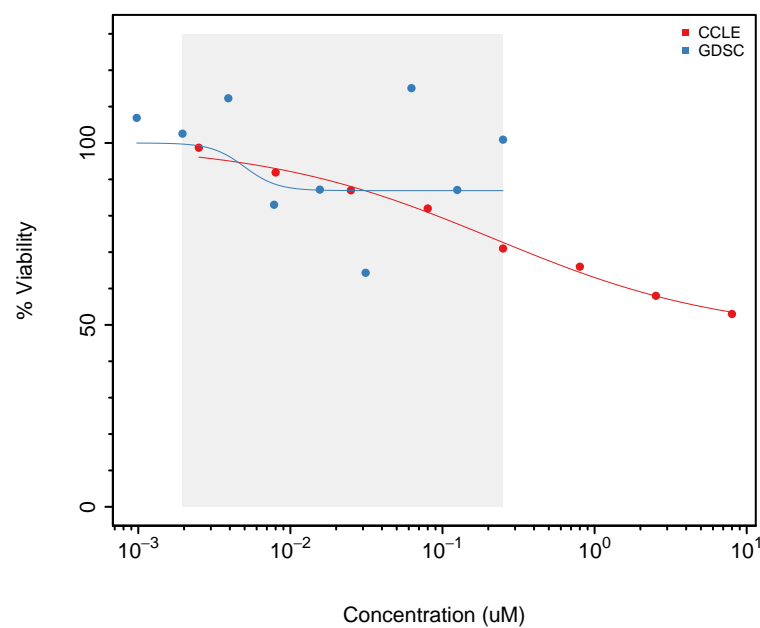

PD-0325901:PSN1

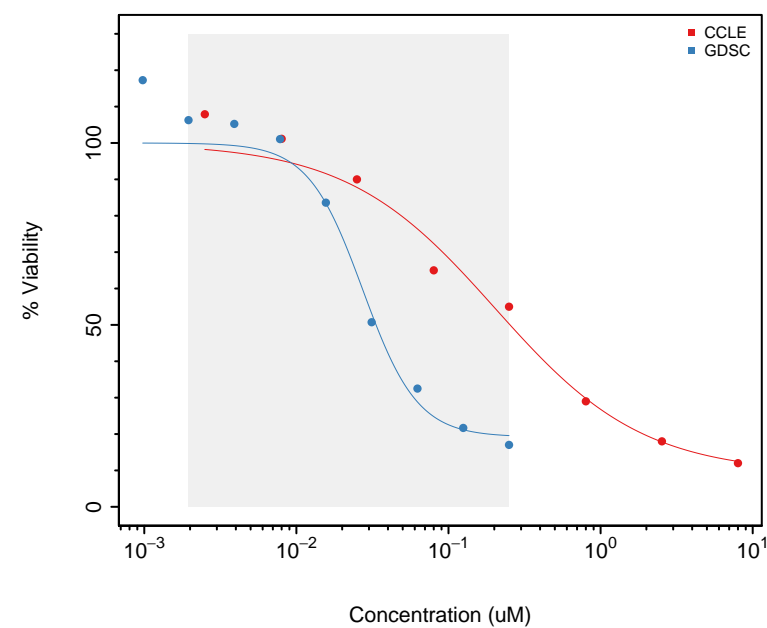

PD-0325901:Raji

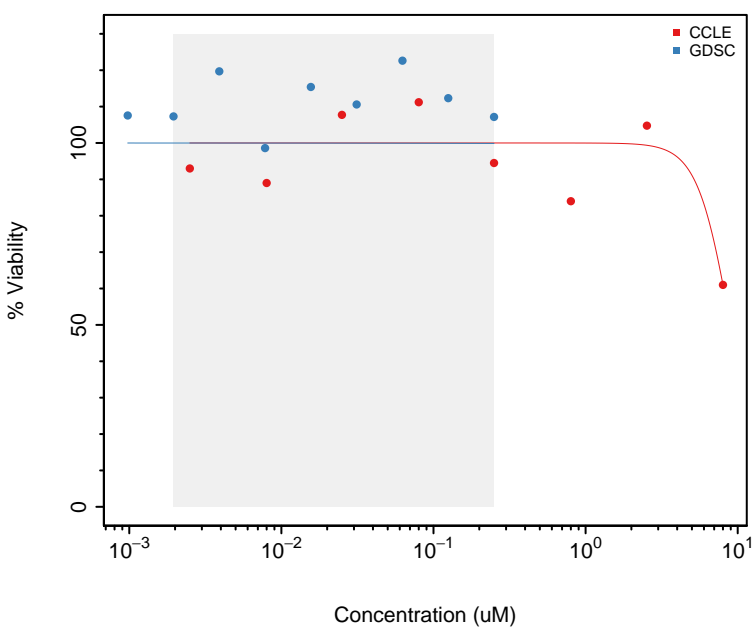

PD-0325901:REH

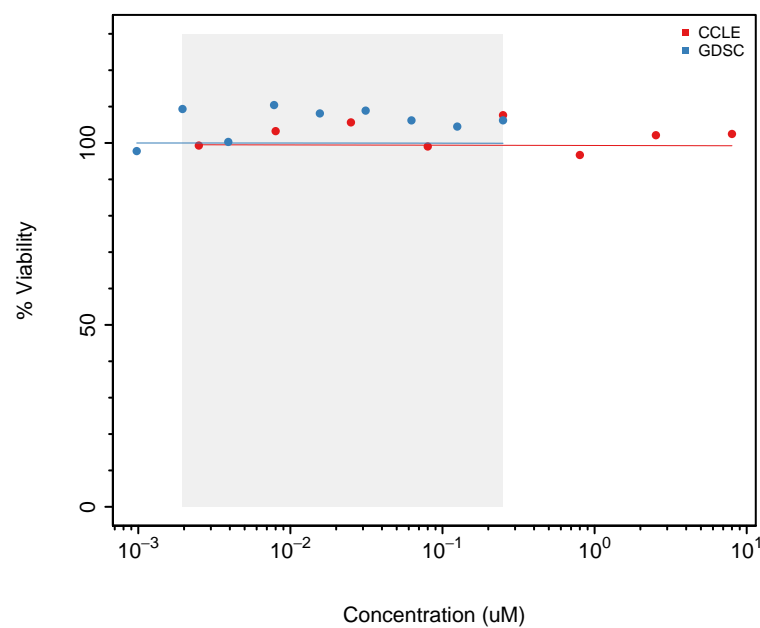

PD-0325901:RERF-LC-MS

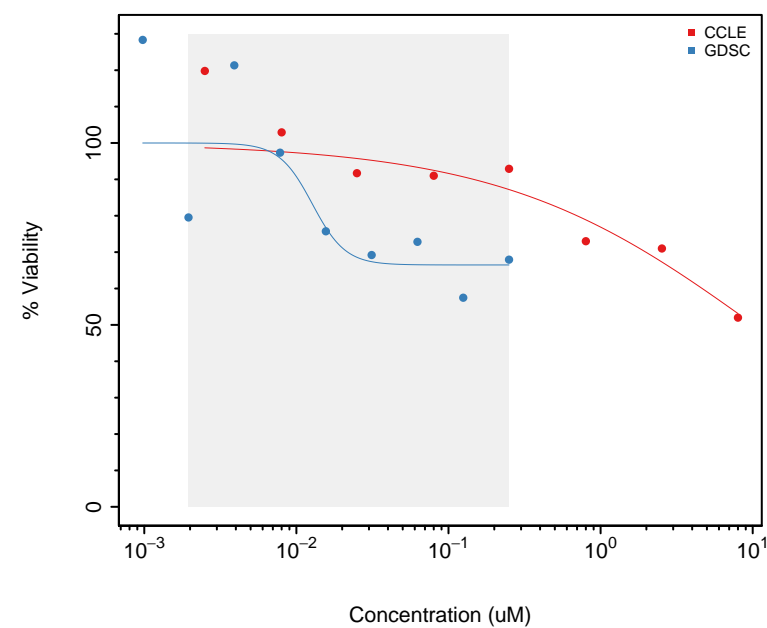

PD-0325901:RKO

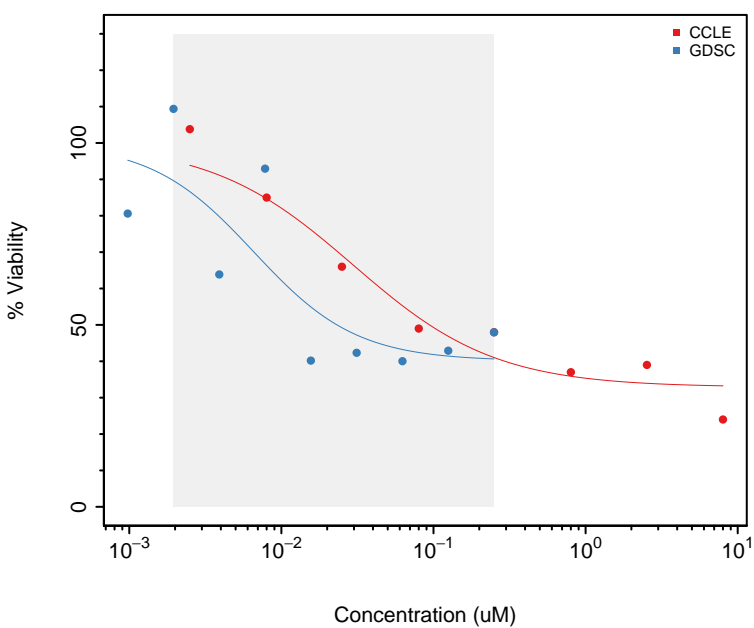

PD-0325901:RL95-2

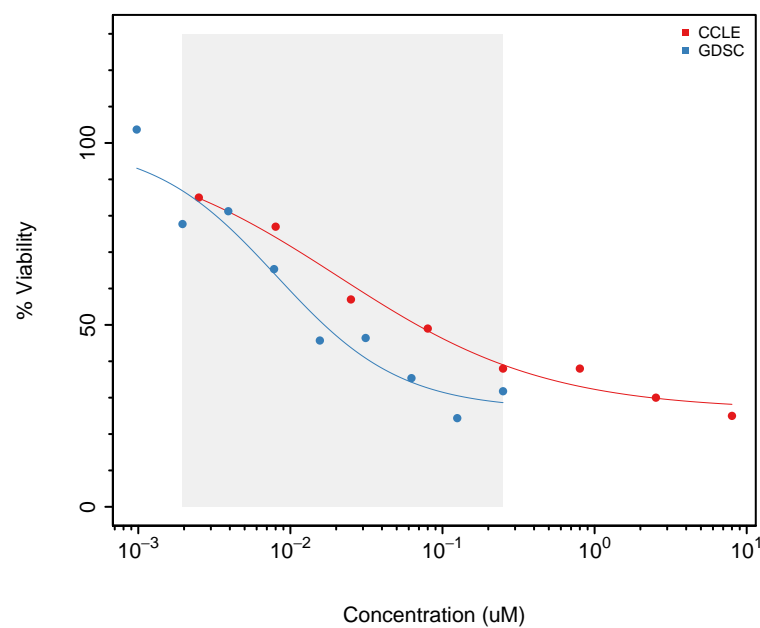

PD-0325901:RPMI-7951

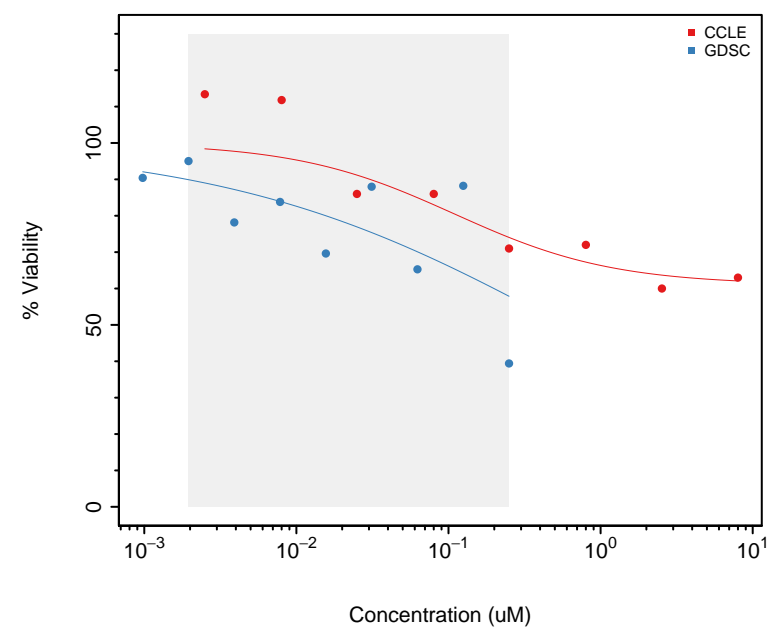

PD-0325901:RPMI-8402

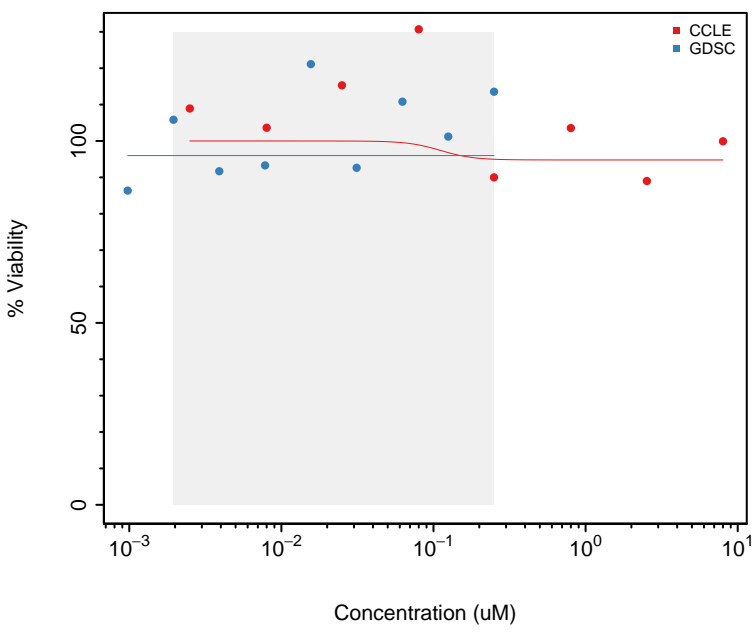

PD-0325901:RT-112

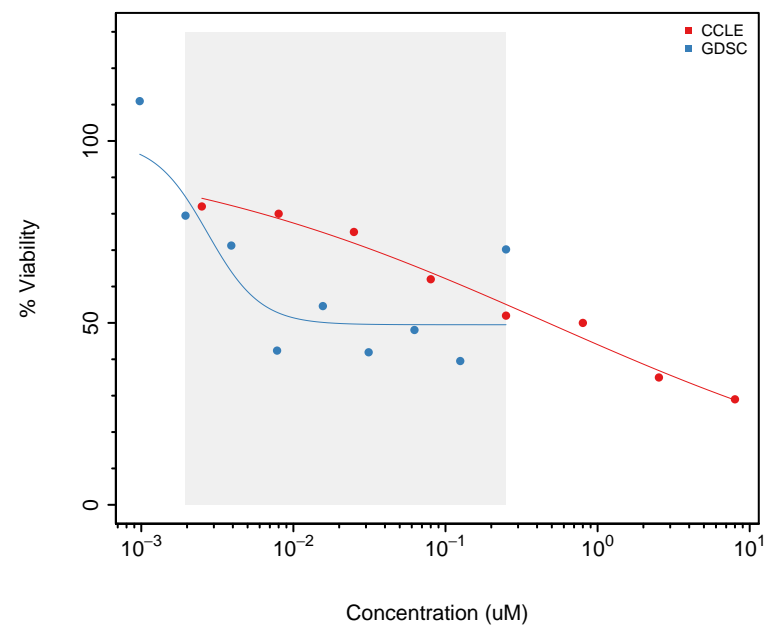

PD-0325901:RVH-421

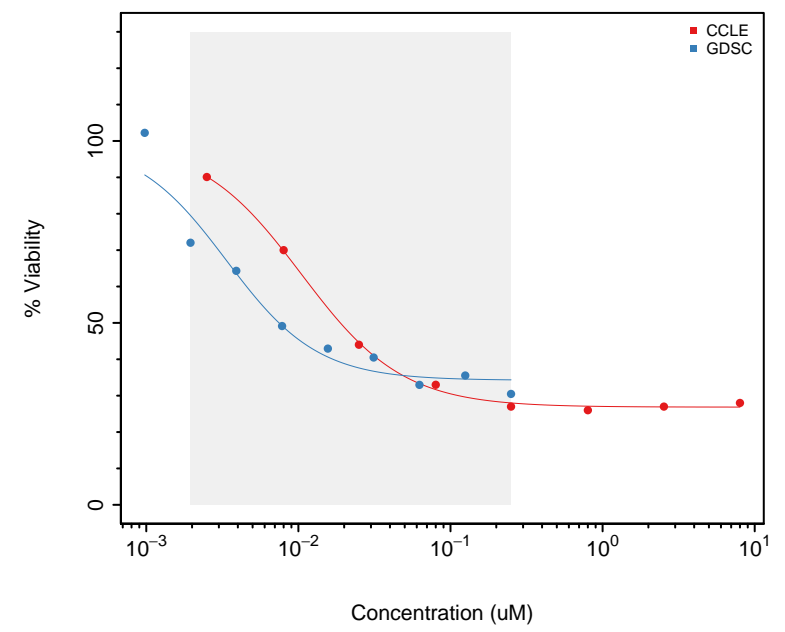

PD-0325901:Saos-2

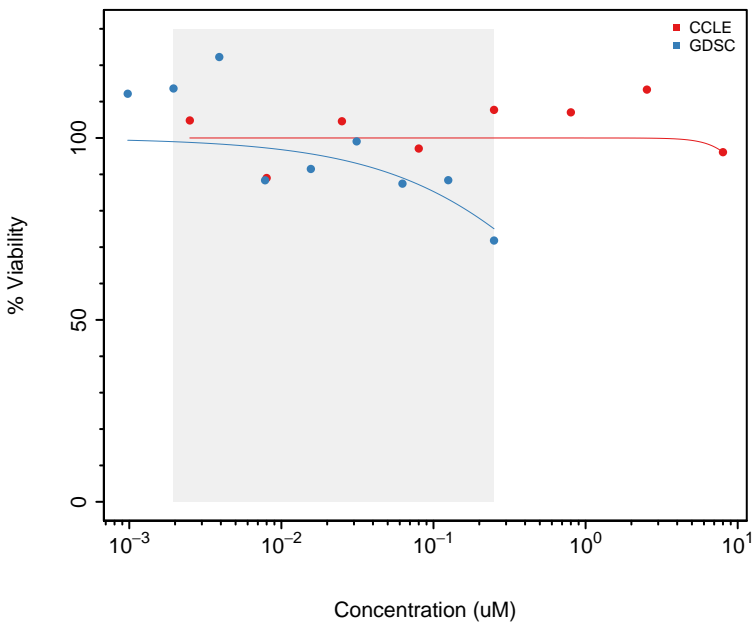

PD-0325901:SBC-5

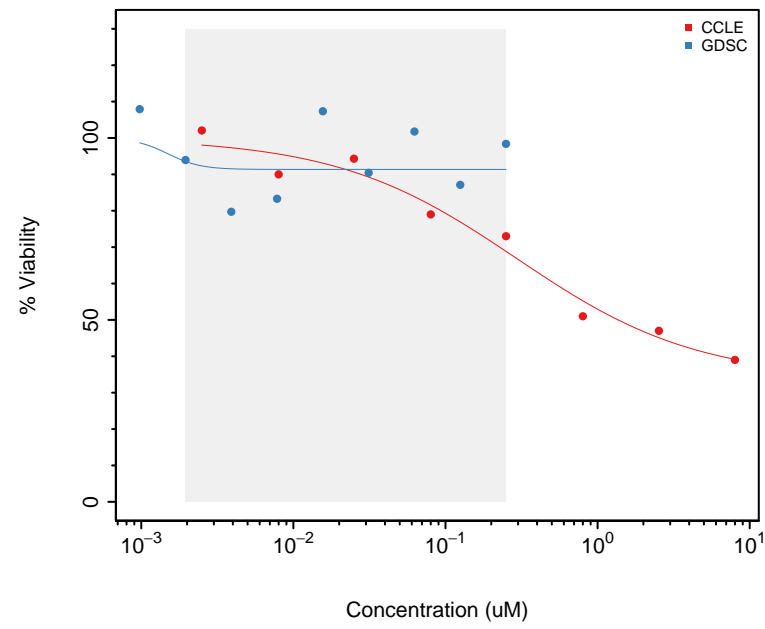

PD-0325901:SCC-25

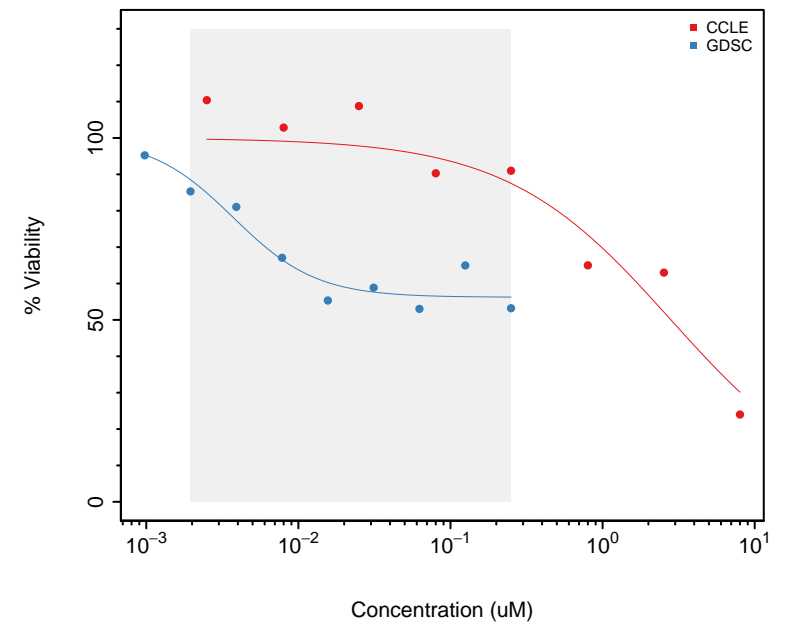

PD-0325901:SCC-9

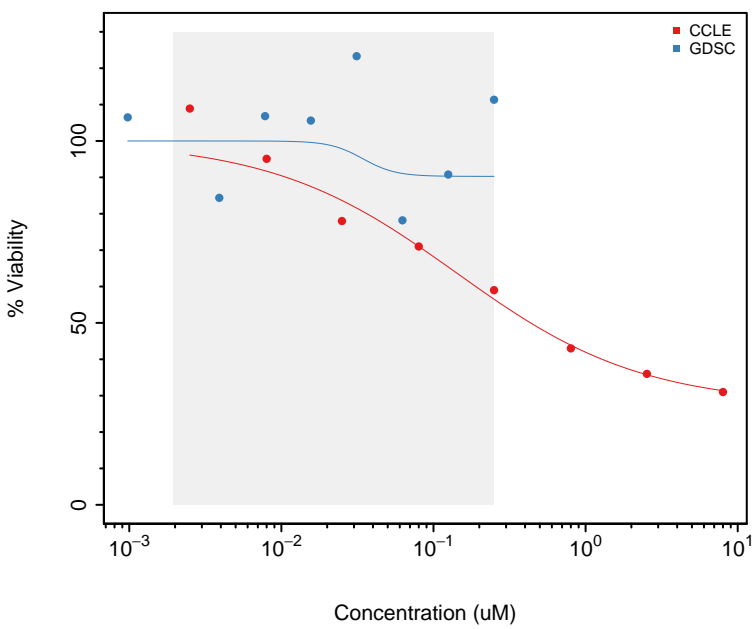

PD-0325901:SF126

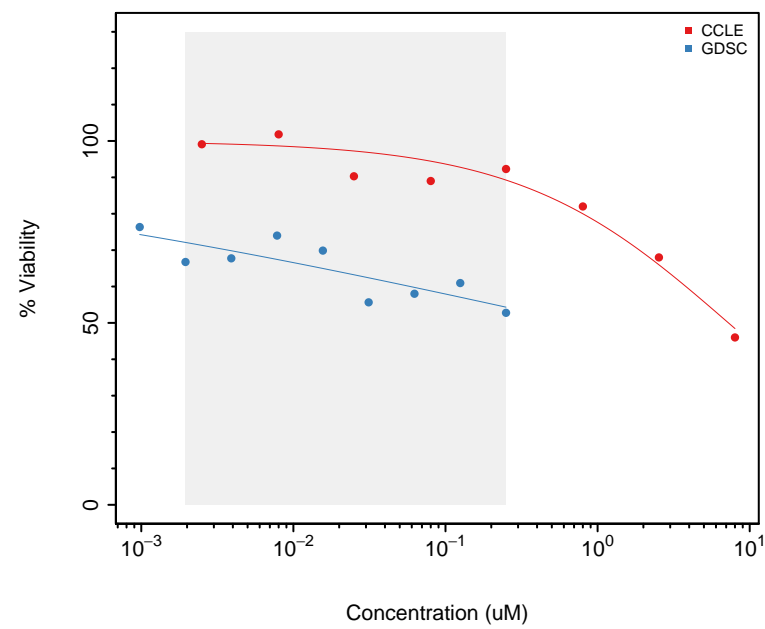

PD-0325901:SF295

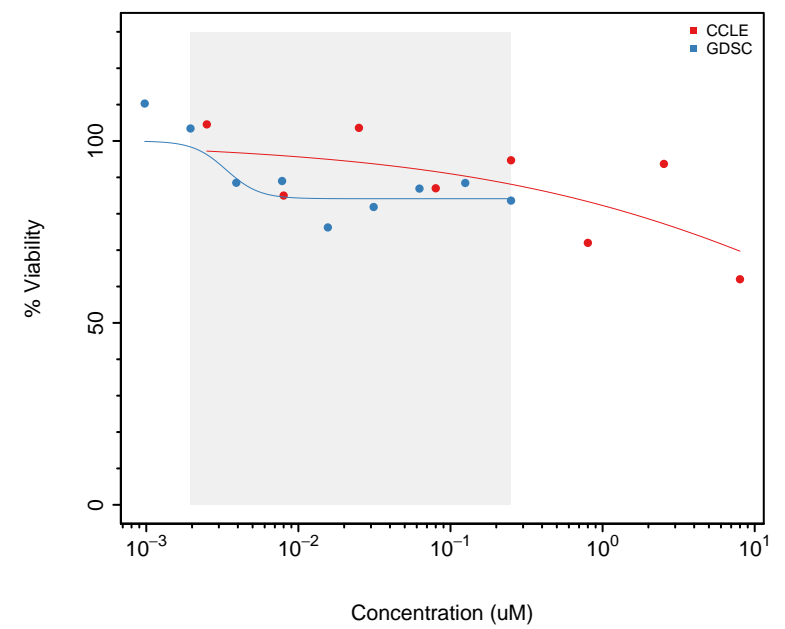

PD-0325901:SHR-77

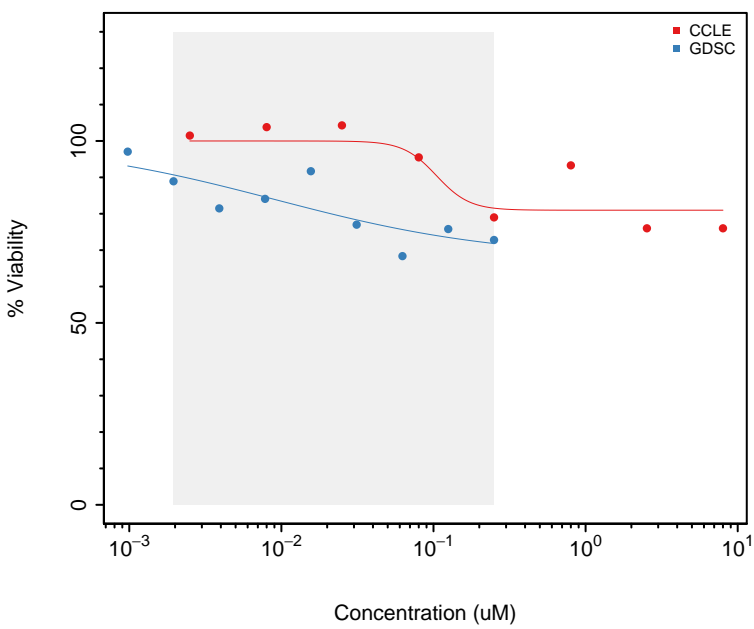

PD-0325901:SIMA

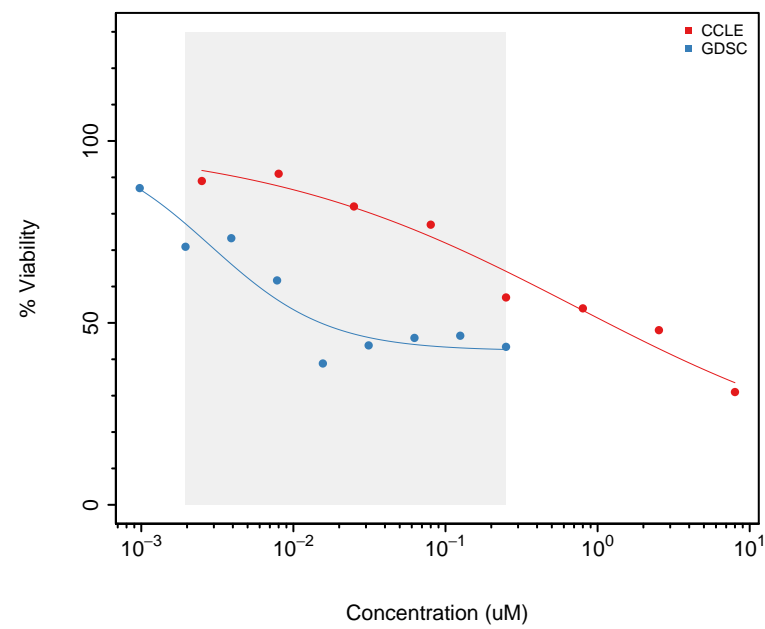

PD-0325901:SJRH30

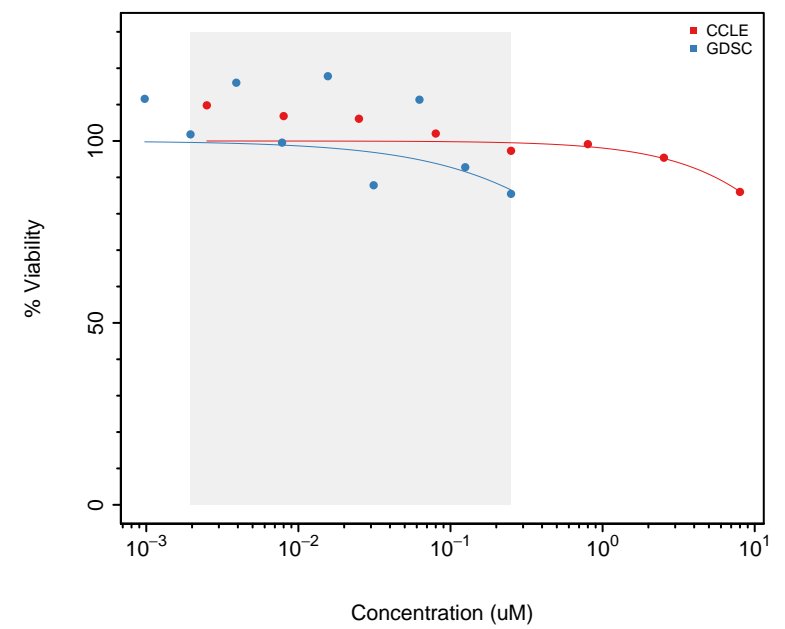



PD-0325901:SK-N-DZ

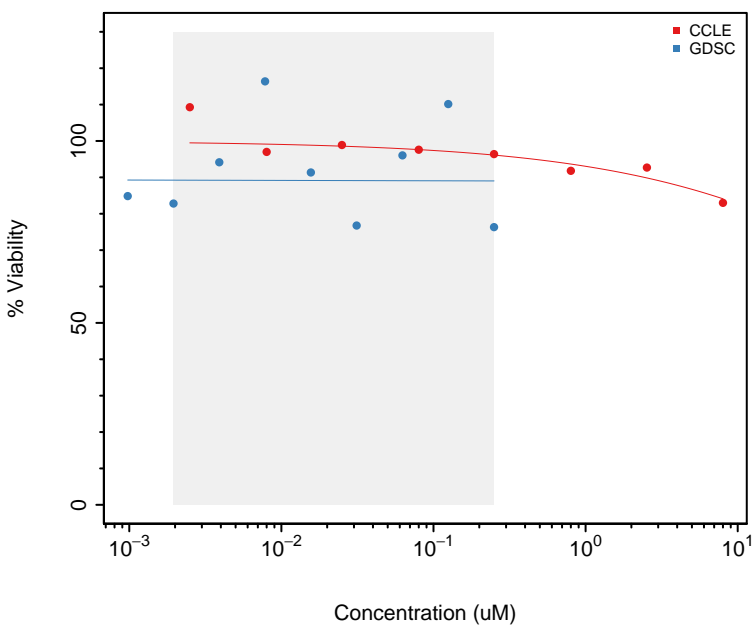

PD-0325901:SK-N-FI

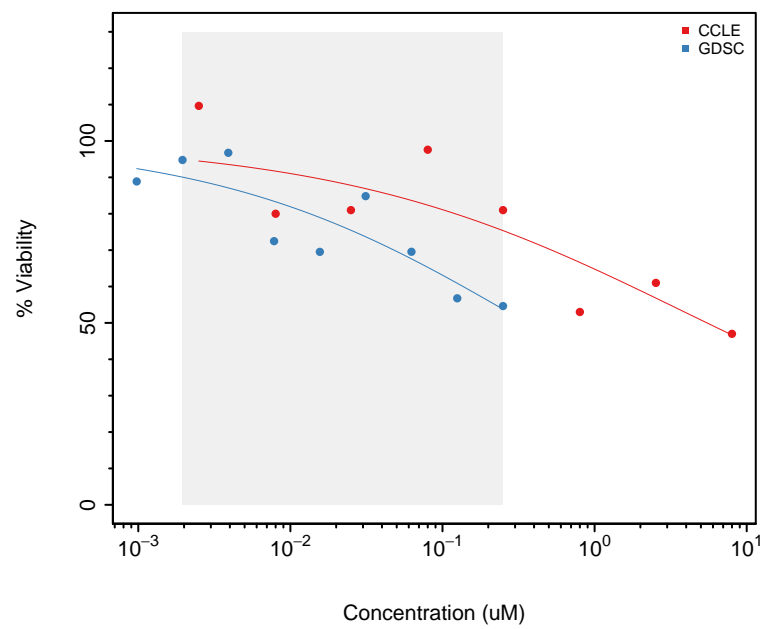

PD-0325901:SK-OV-3

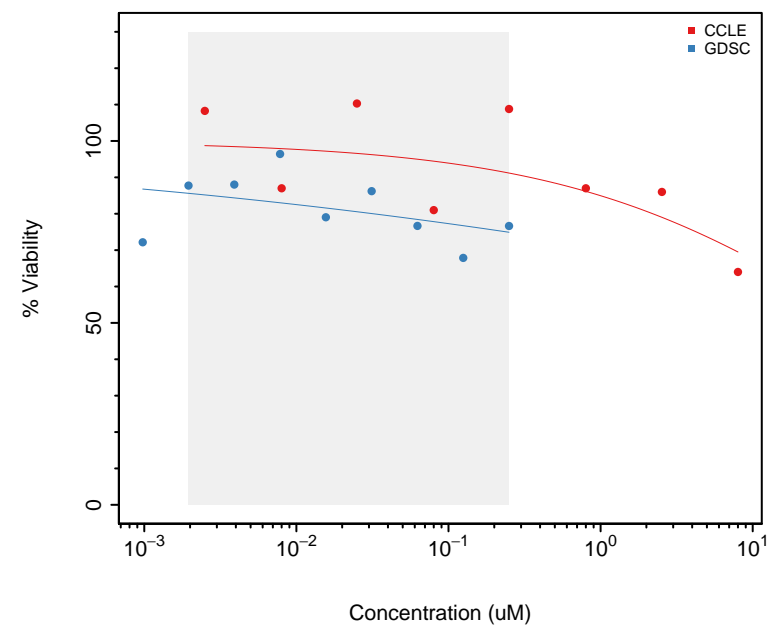

PD-0325901:SNG-M

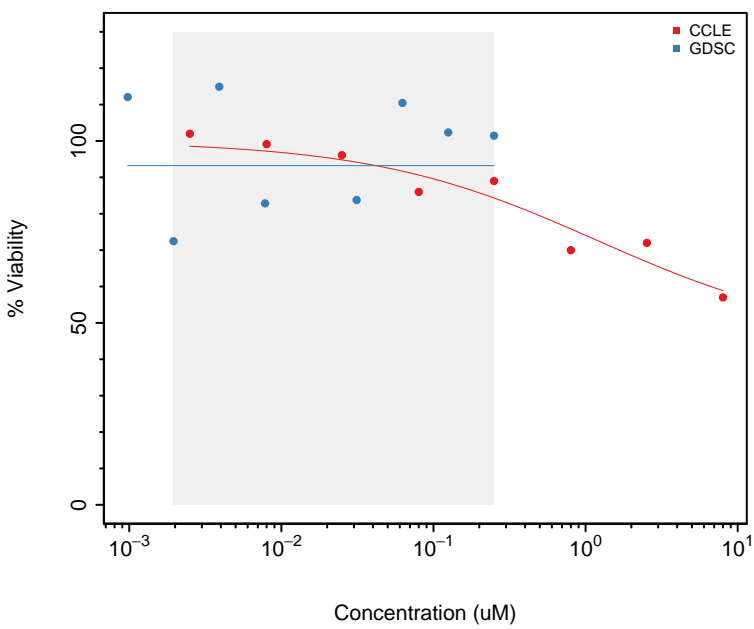

PD-0325901:NCI-SNU-1

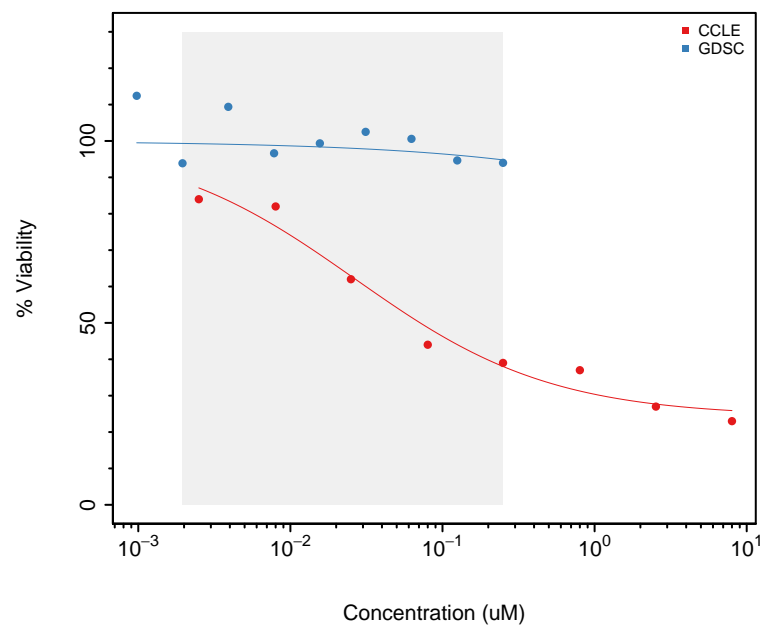

PD-0325901:NCI-SNU-16

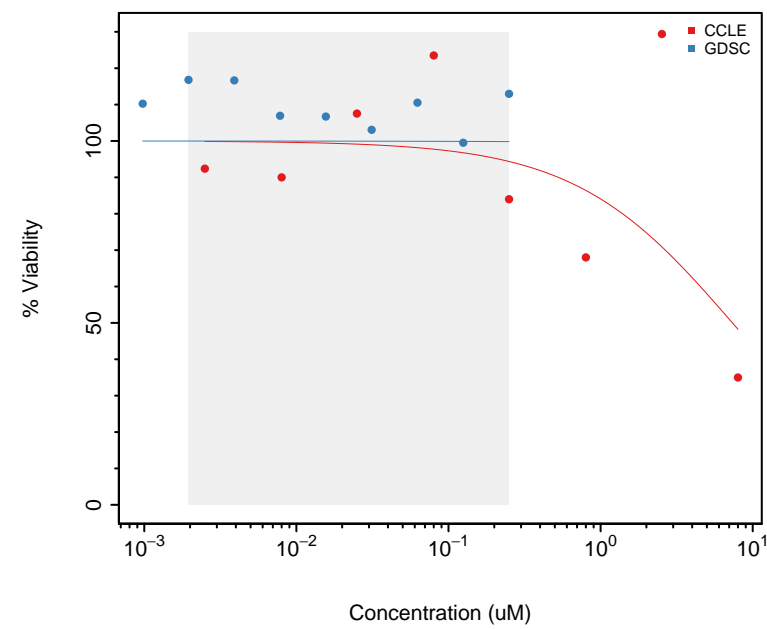

PD-0325901:SNU-387

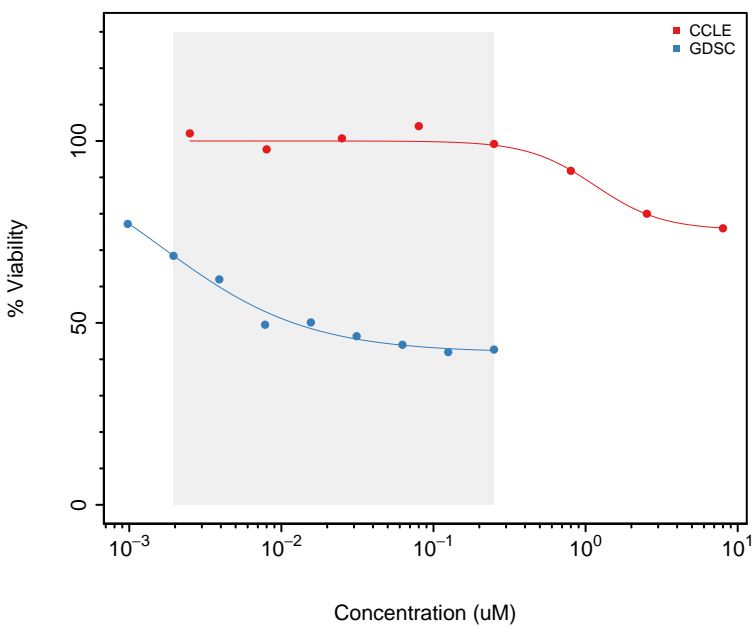

PD-0325901:SNU-423

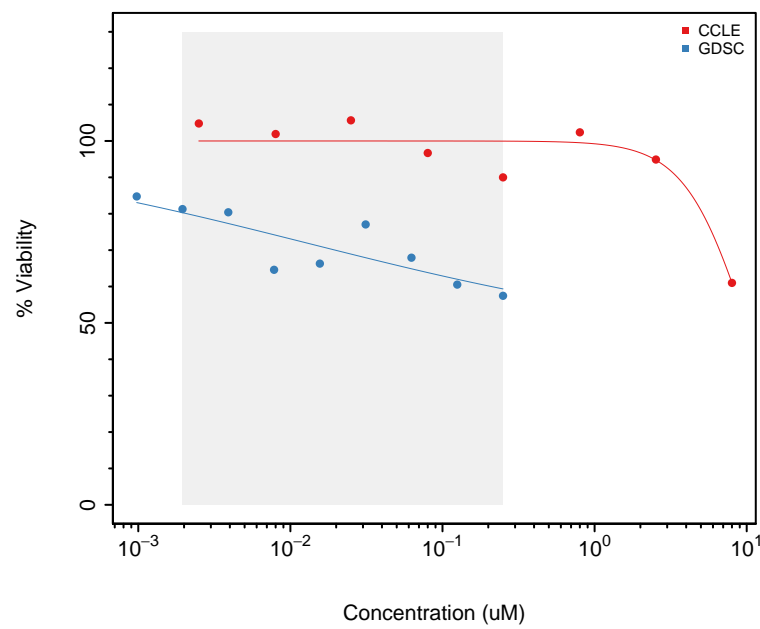

PD-0325901:SNU-449

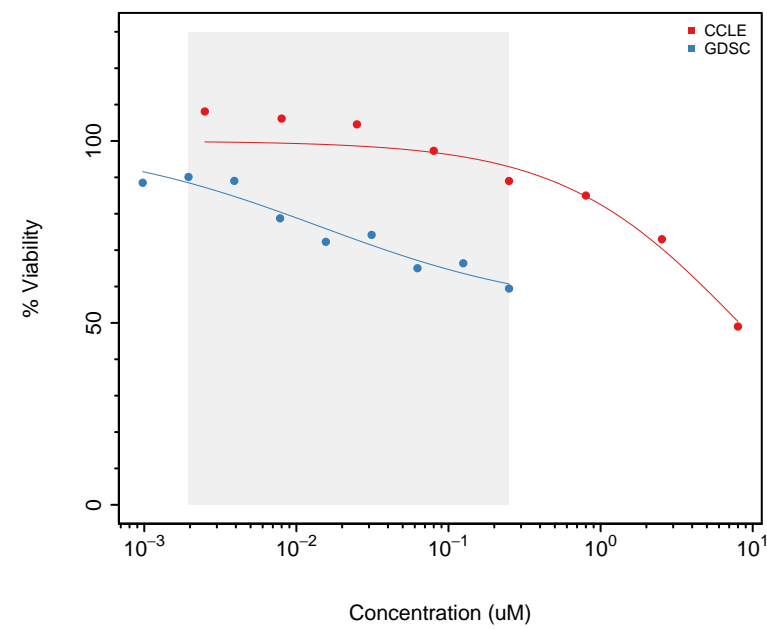

PD-0325901:SNU-C2B

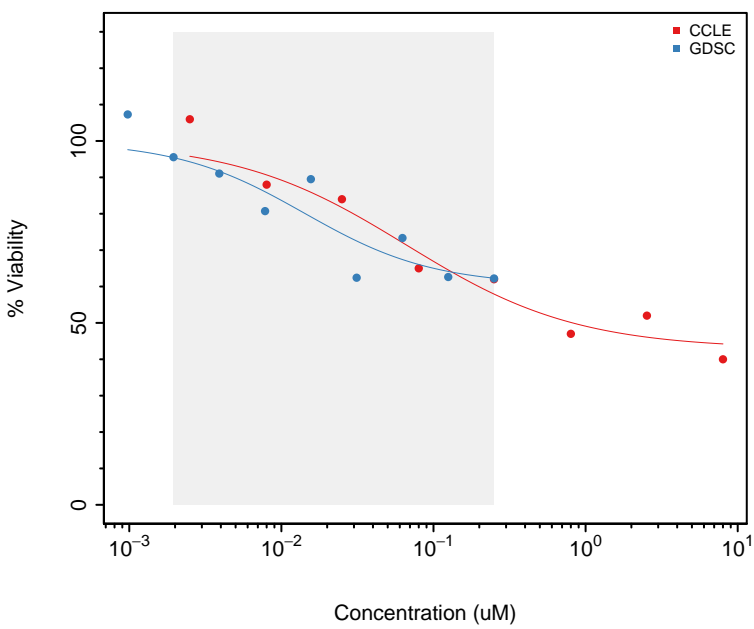

PD-0325901:SUP-T1

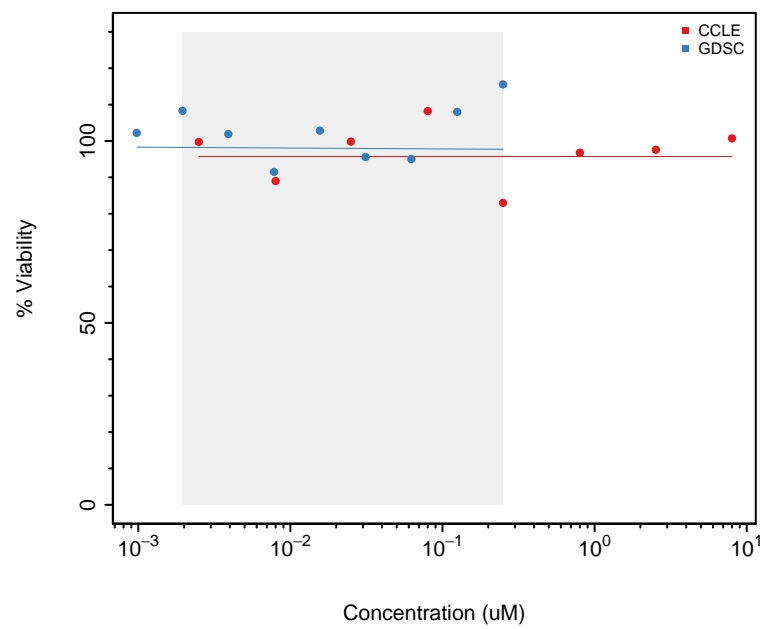

PD-0325901:SW1088

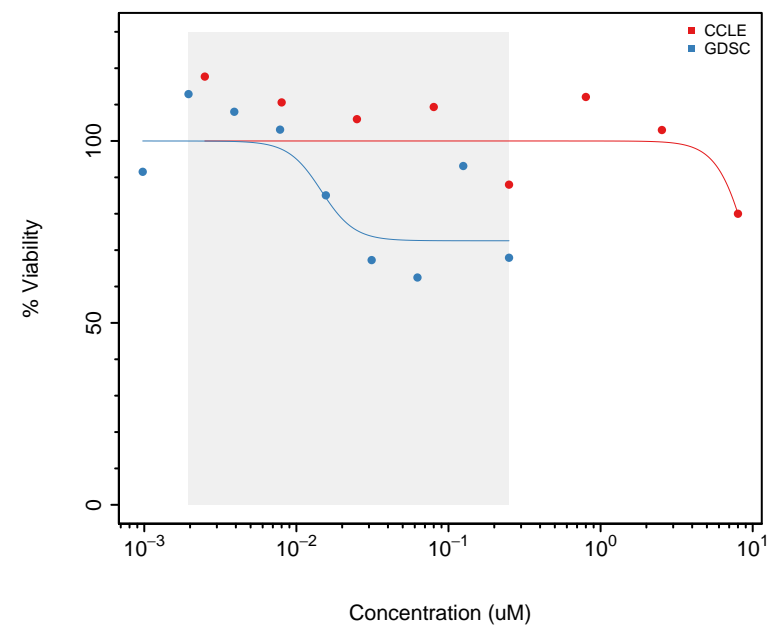





PD-0325901:WM-115

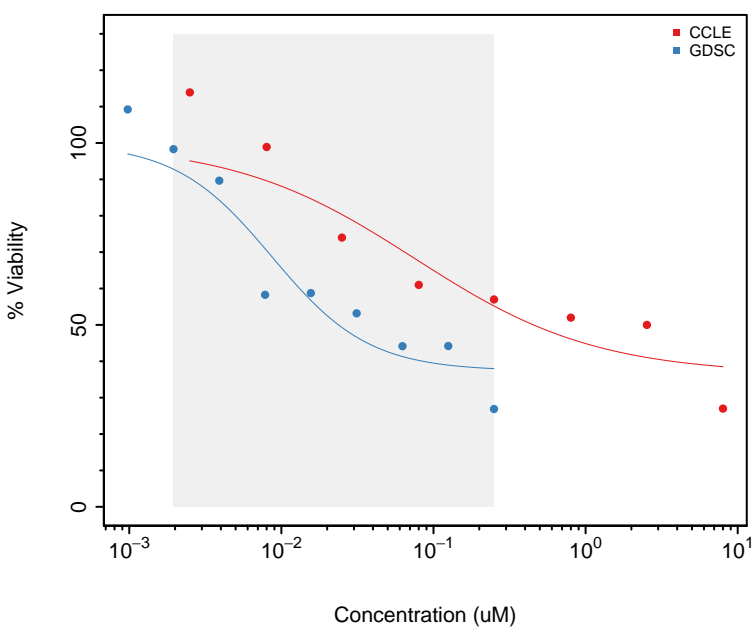

PD-0325901:YKG-1

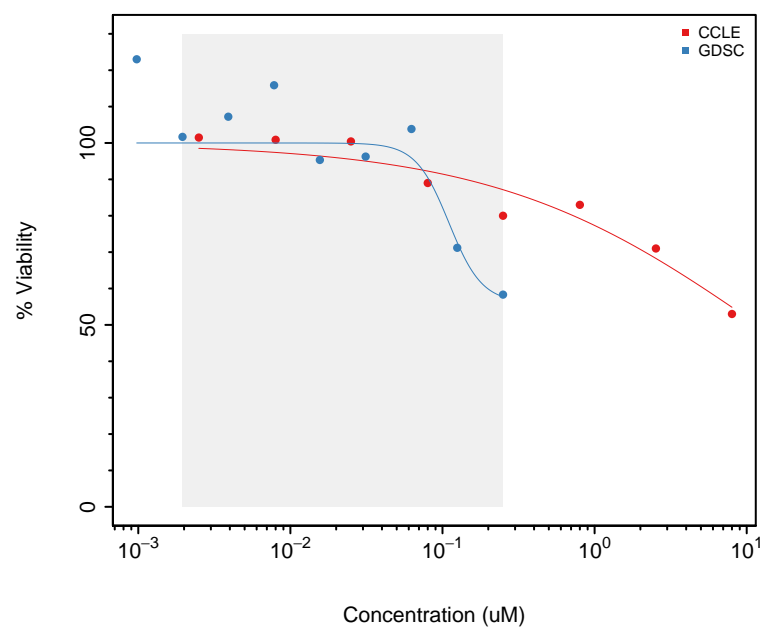

PD-0325901:ZR-75-30

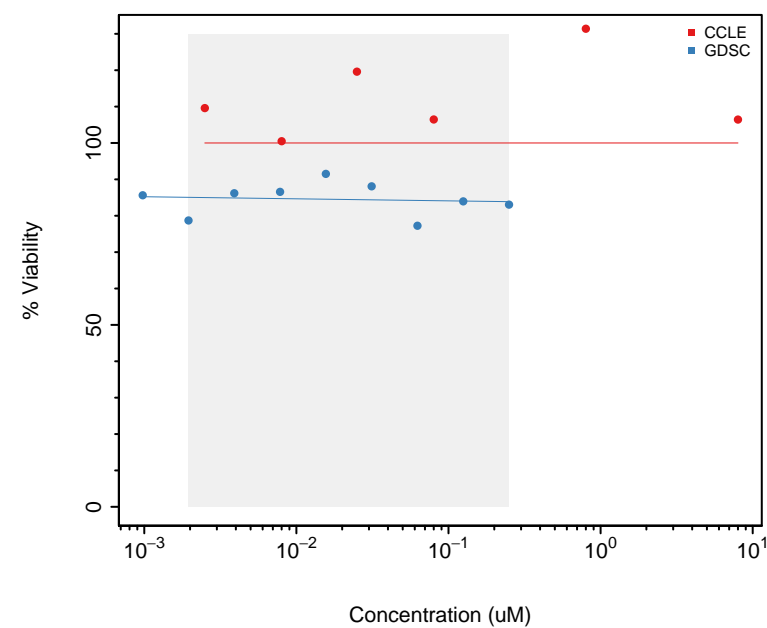

PD-0332991:22RV1

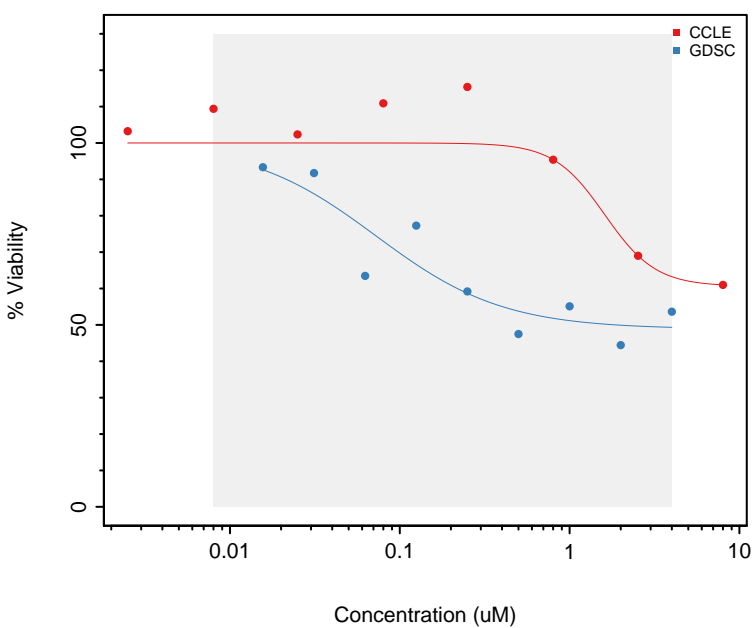

PD-0332991:5637

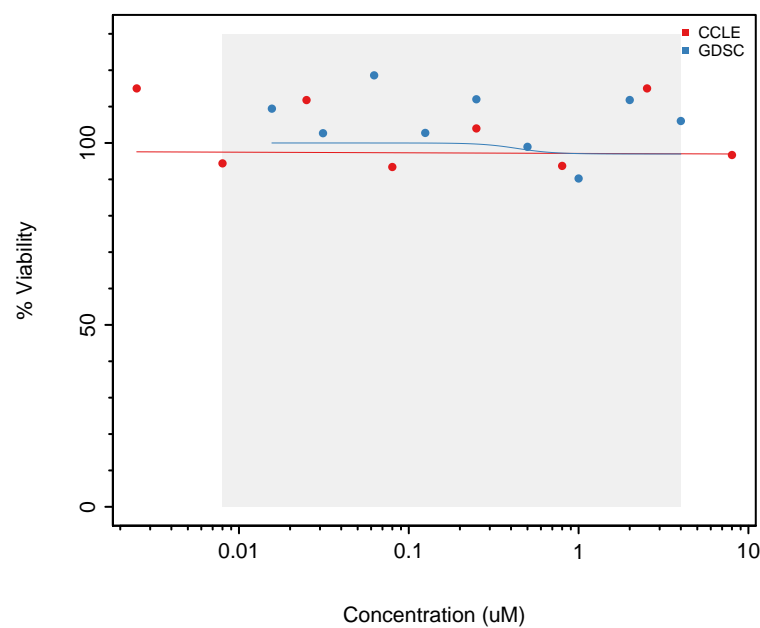

PD-0332991:639-V

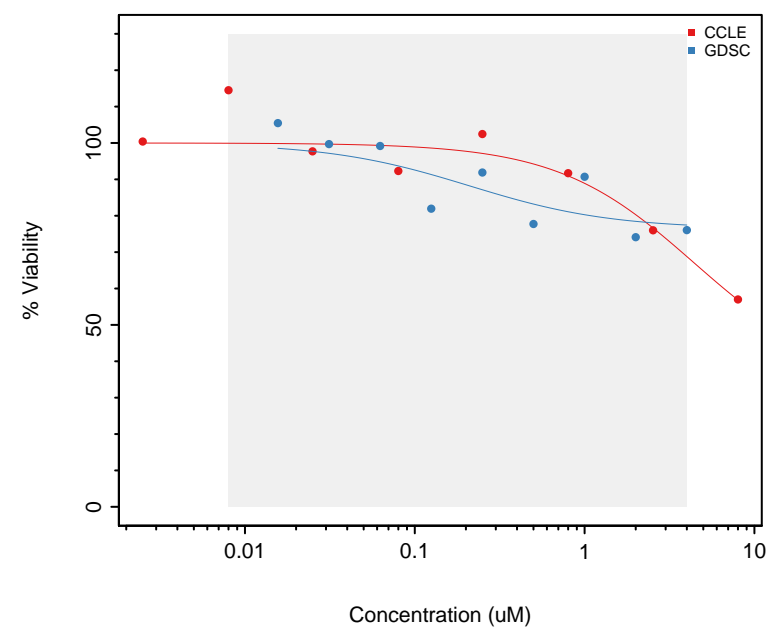

PD-0332991:697

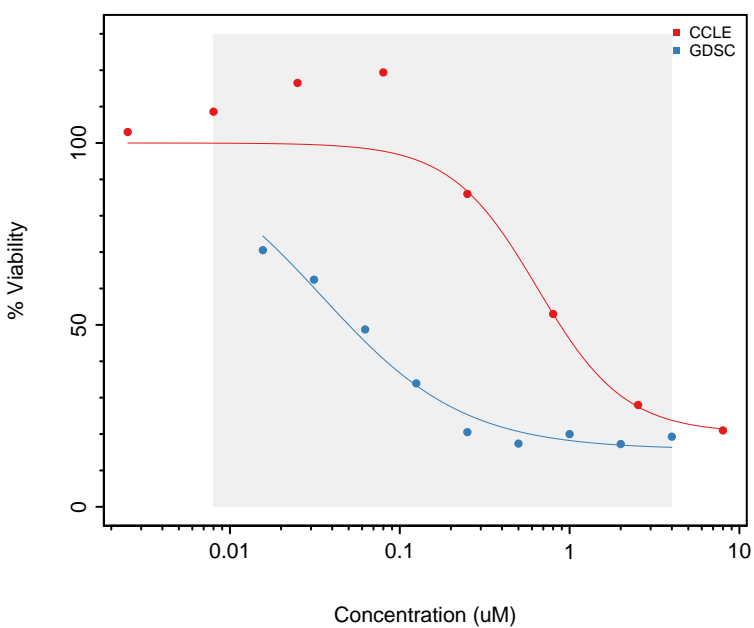

PD-0332991:786-0

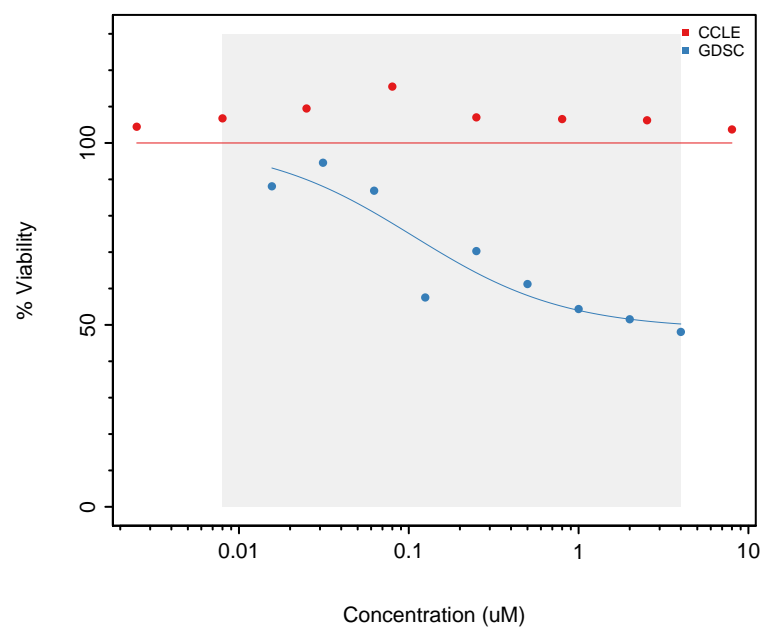

PD-0332991:8305C

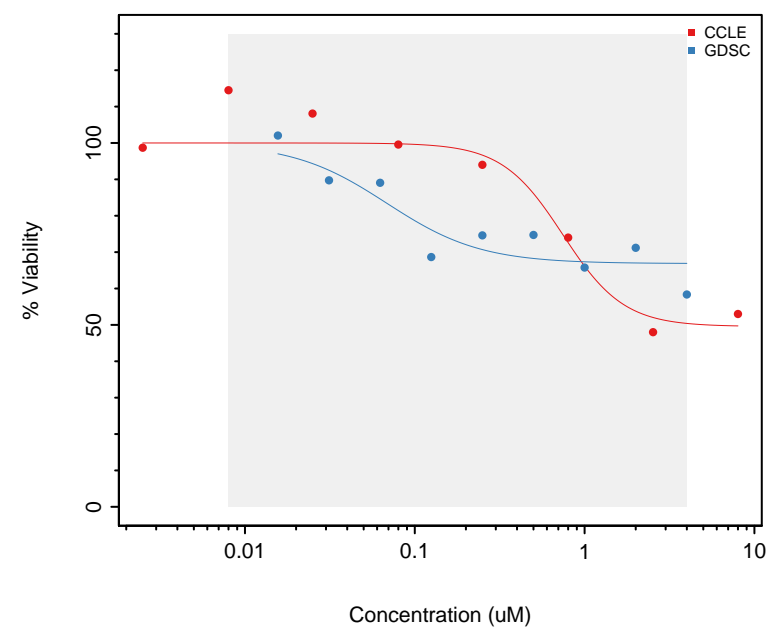

PD-0332991:8505C

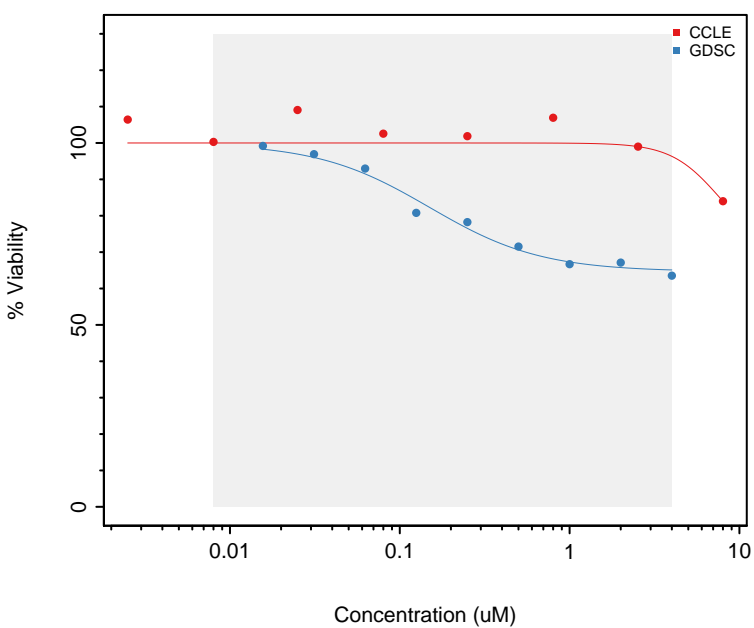

PD-0332991:A204

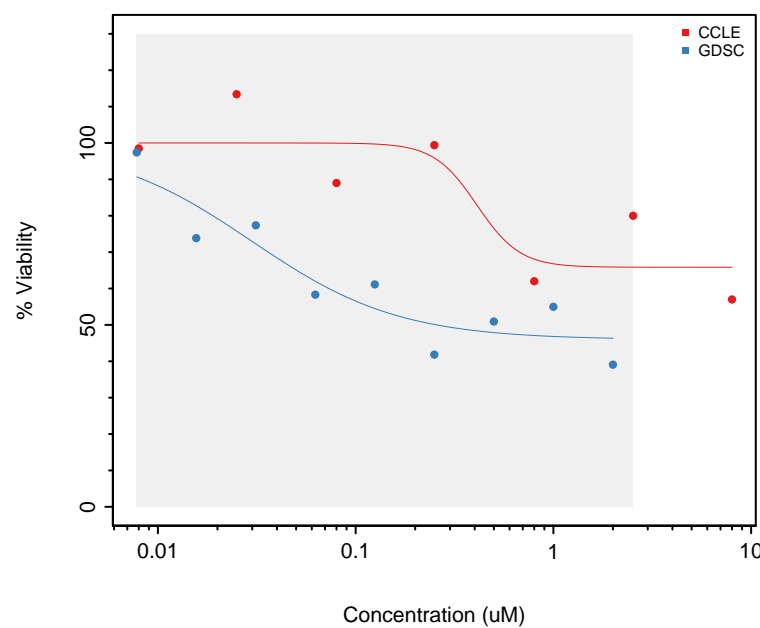

PD-0332991:A253

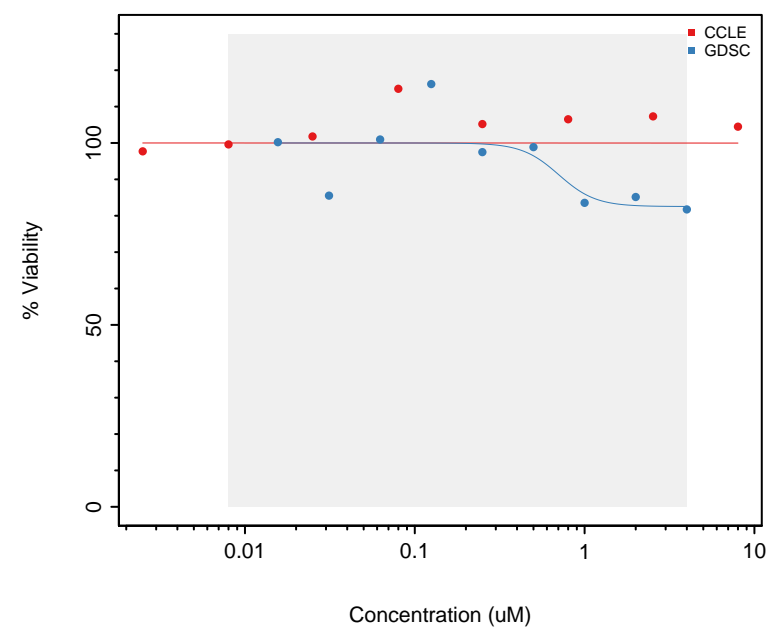





PD-0332991:C2BBe1

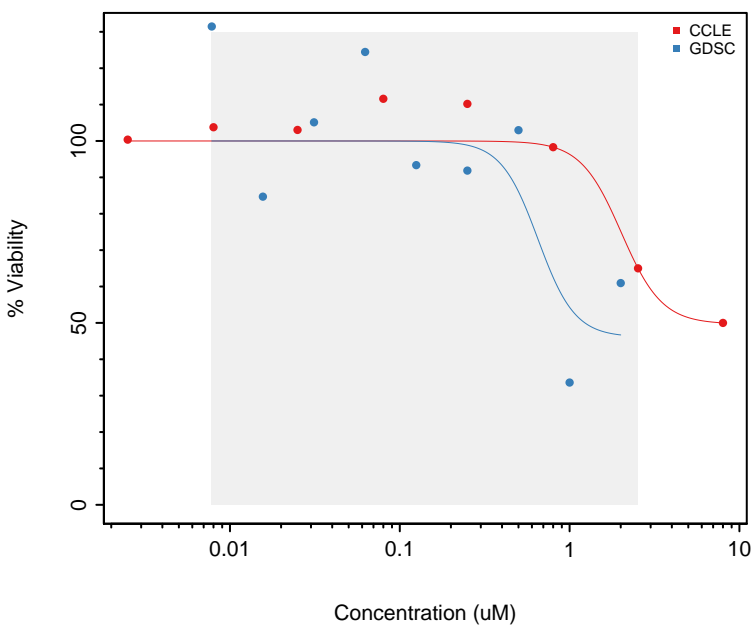

PD-0332991:C32

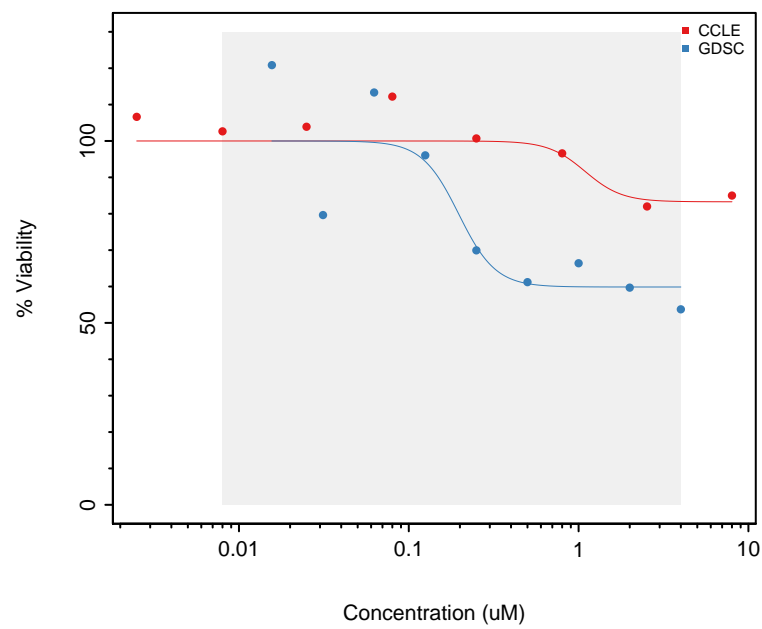

PD-0332991:C3A

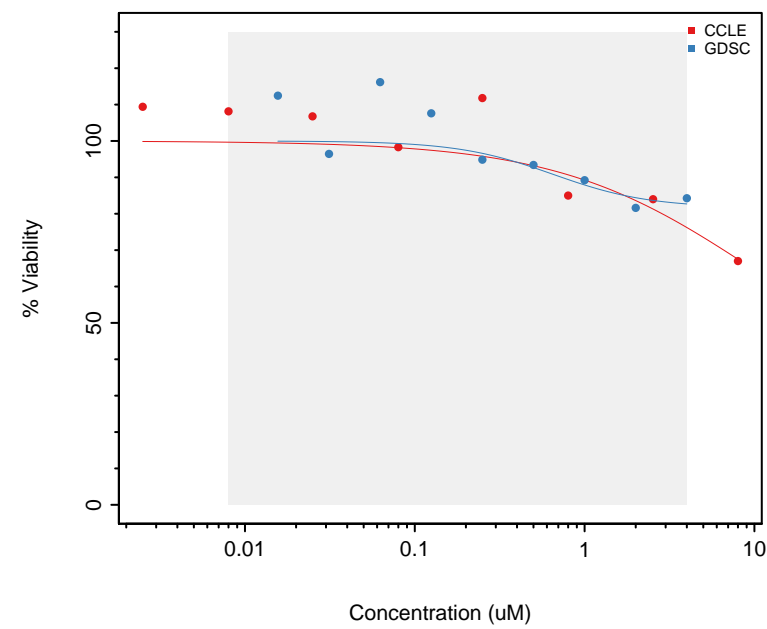

PD-0332991:CAL-27

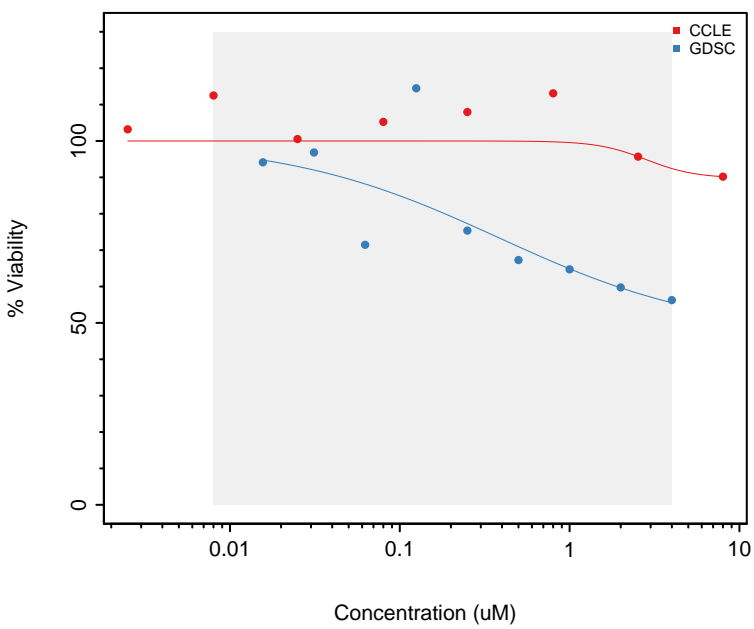

PD-0332991:CAL-85-1

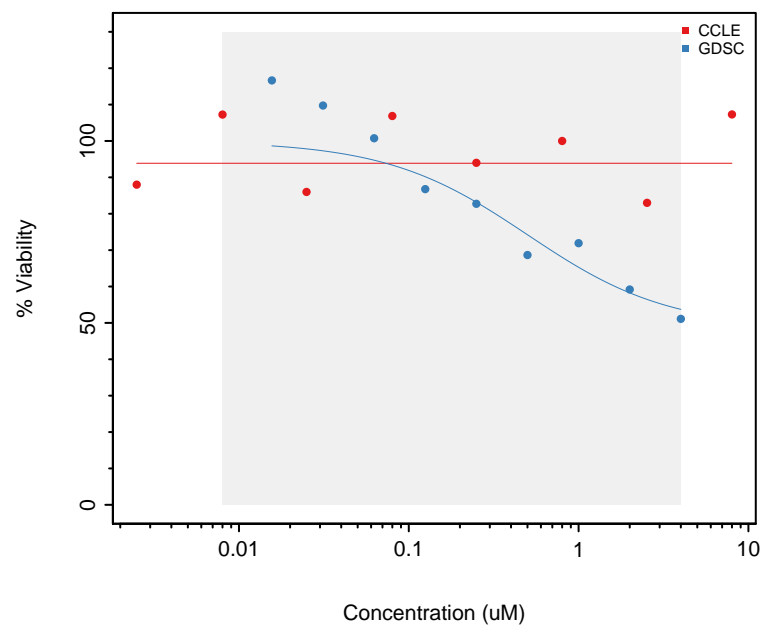

PD-0332991:Calu-3

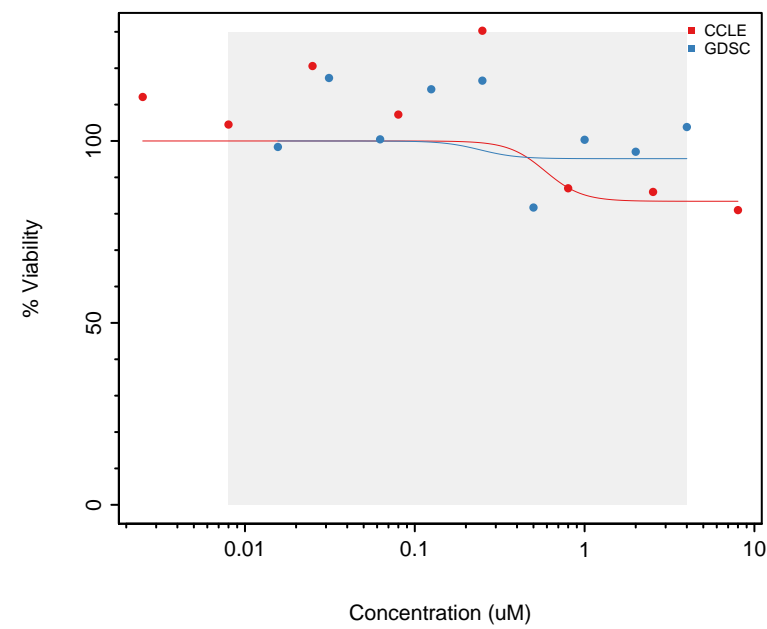

PD-0332991:CAMA-1

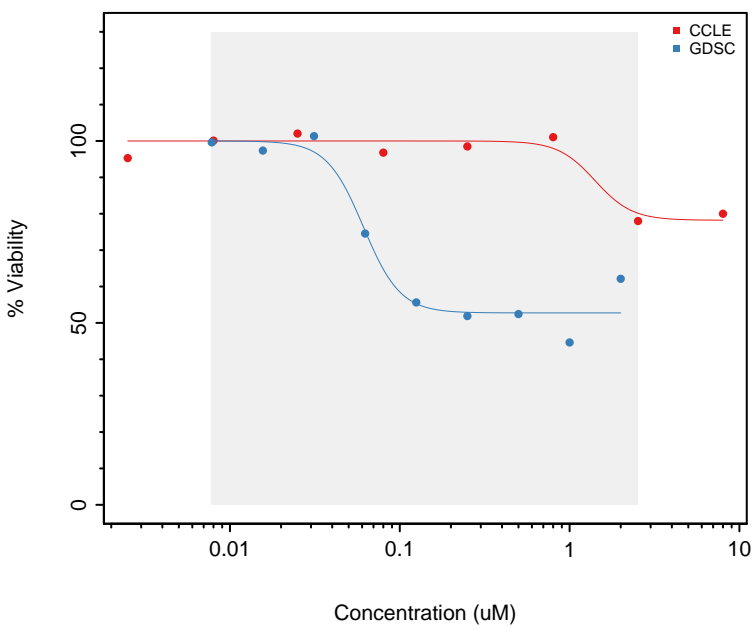

PD-0332991:Capan-2

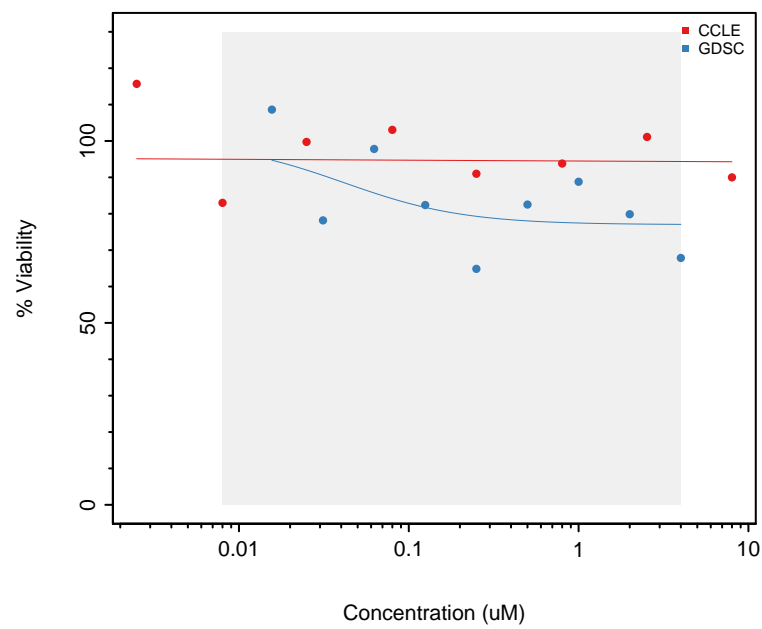

PD-0332991:CAS-1

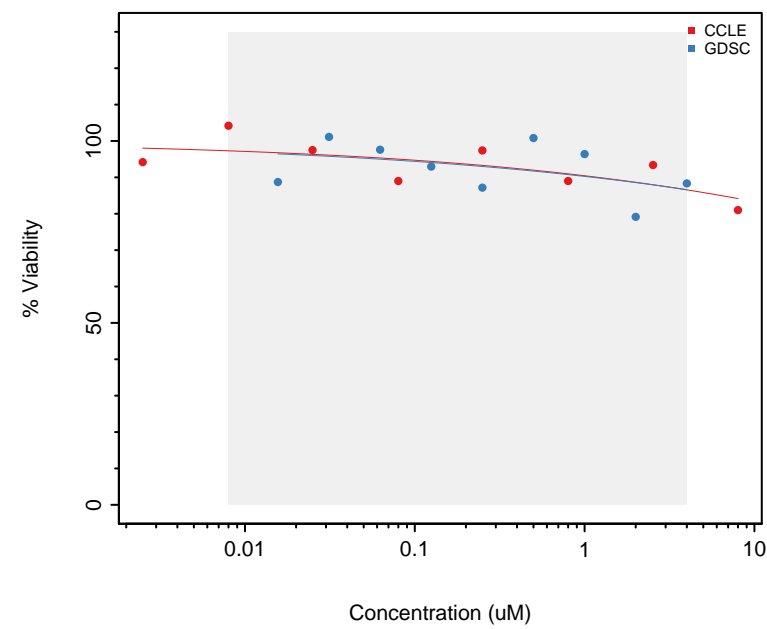

PD-0332991:CHL-1

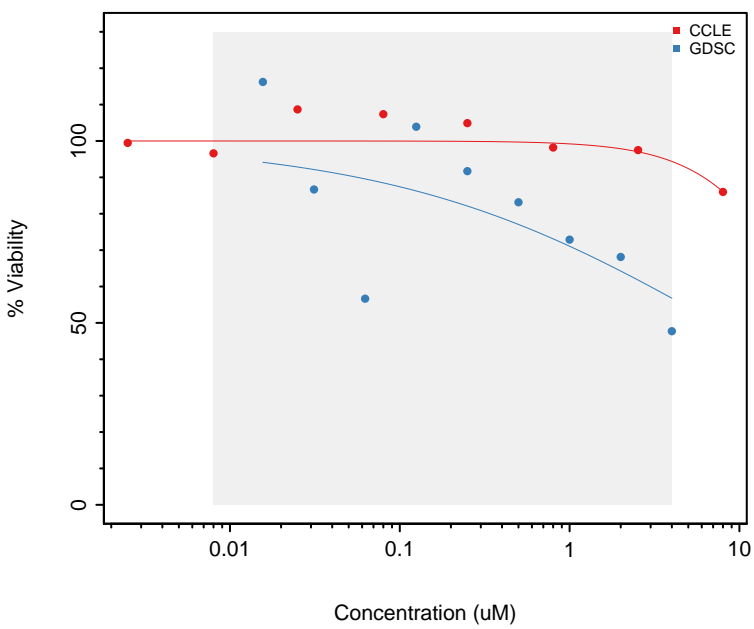

PD-0332991:COLO-205

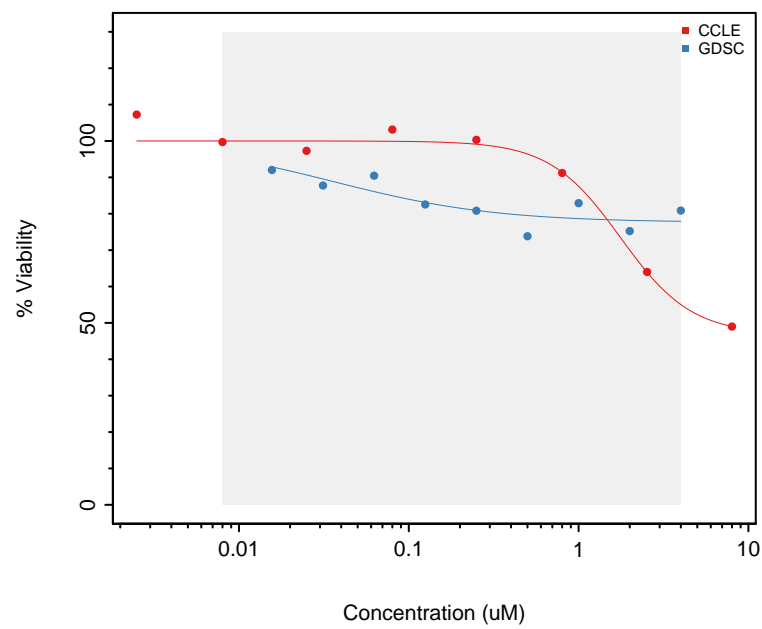

PD-0332991:COLO-320-HSR

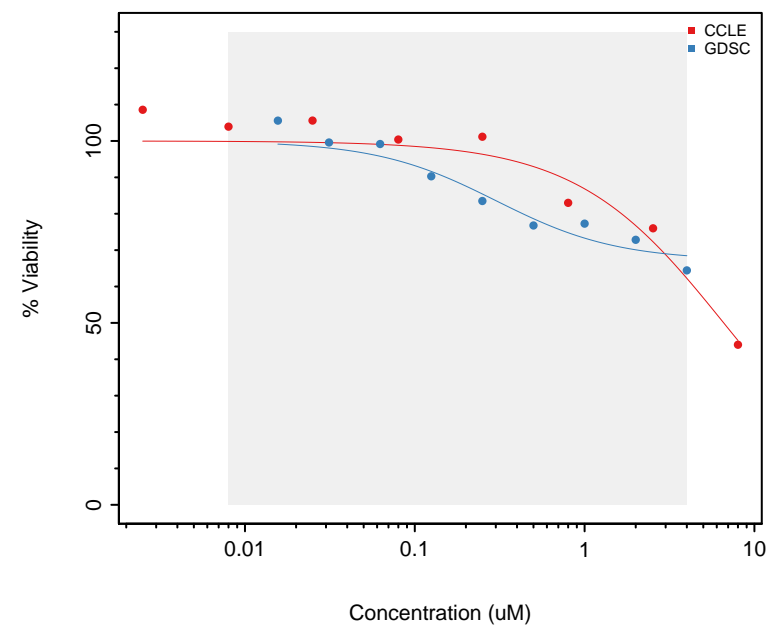

PD-0332991:COLO-678

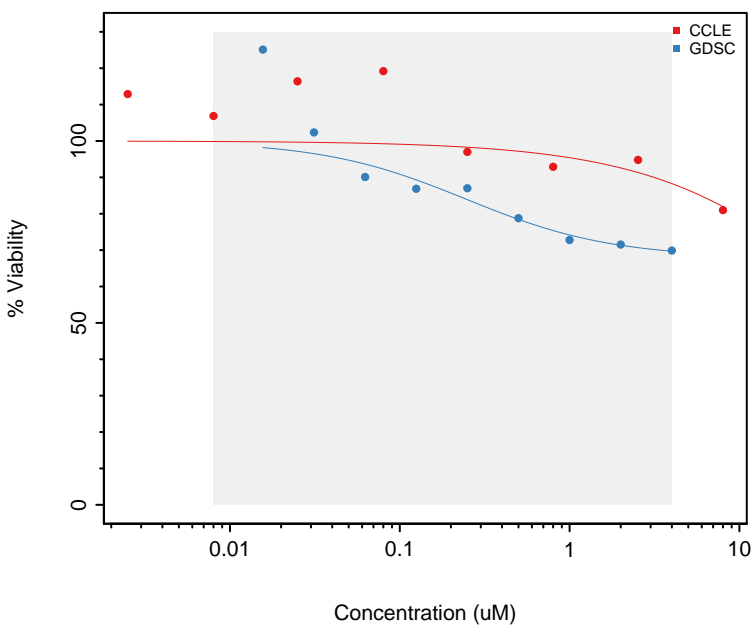

PD-0332991:COLO-679

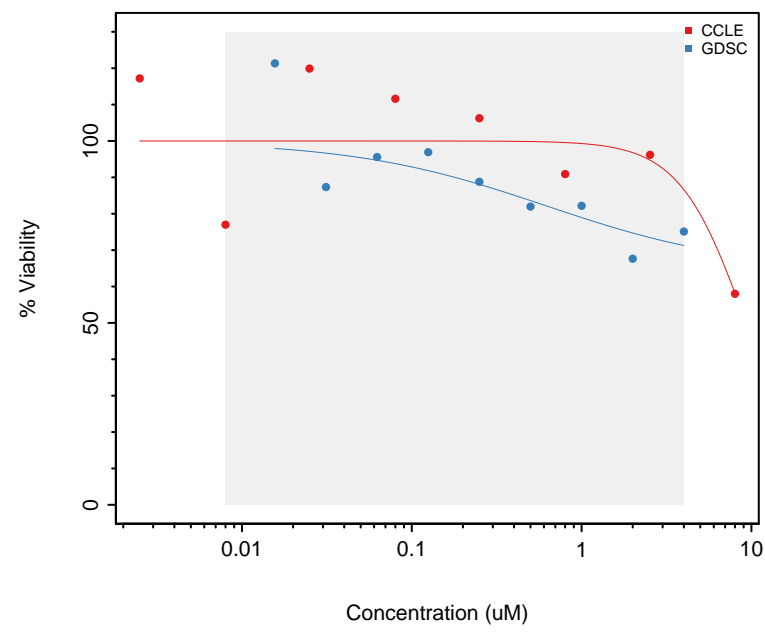

PD-0332991:COR-L23

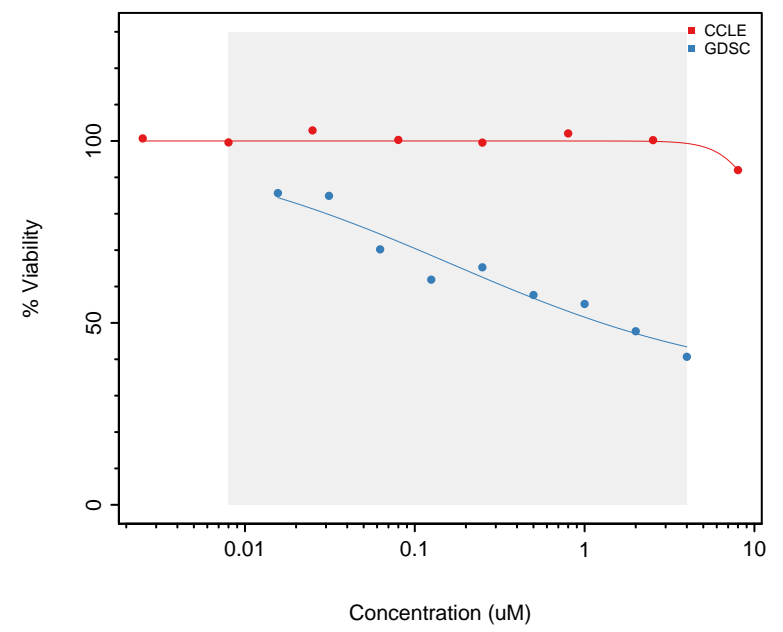

PD-0332991:DBTRG-05MG

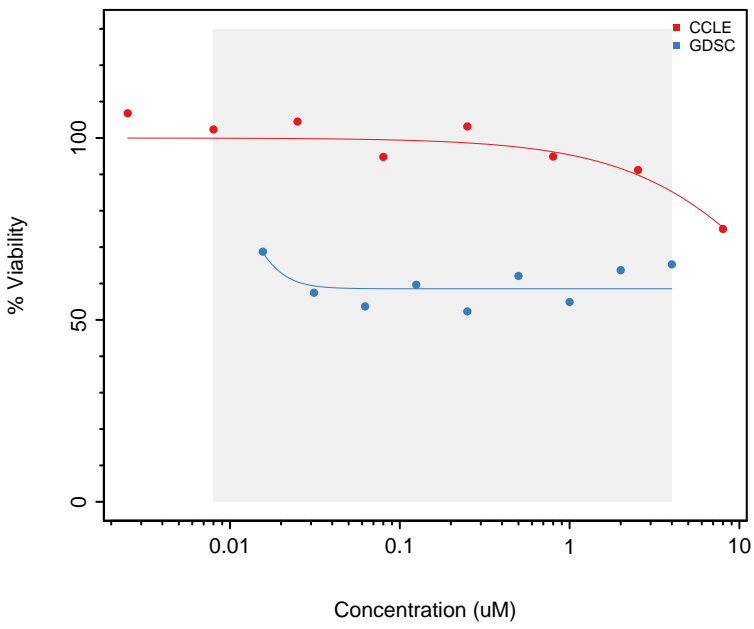

PD-0332991:DEL

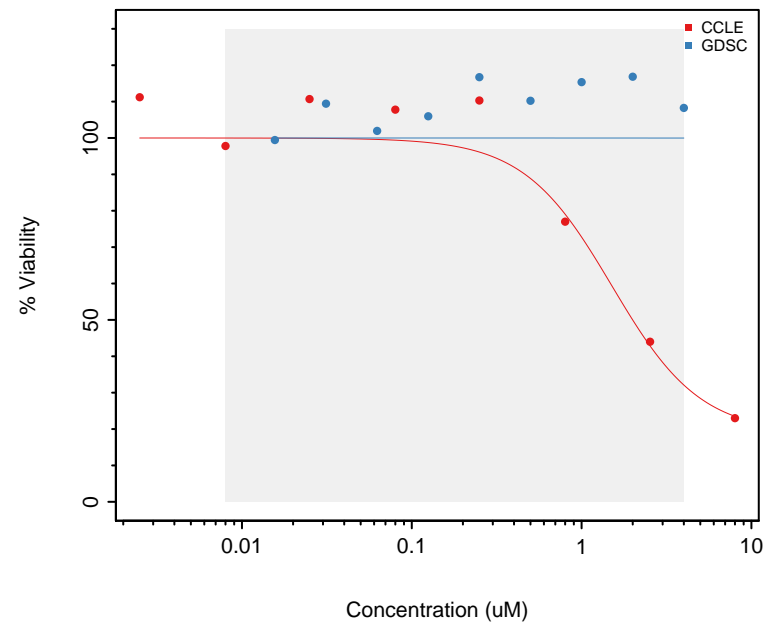

PD-0332991:Detroit562

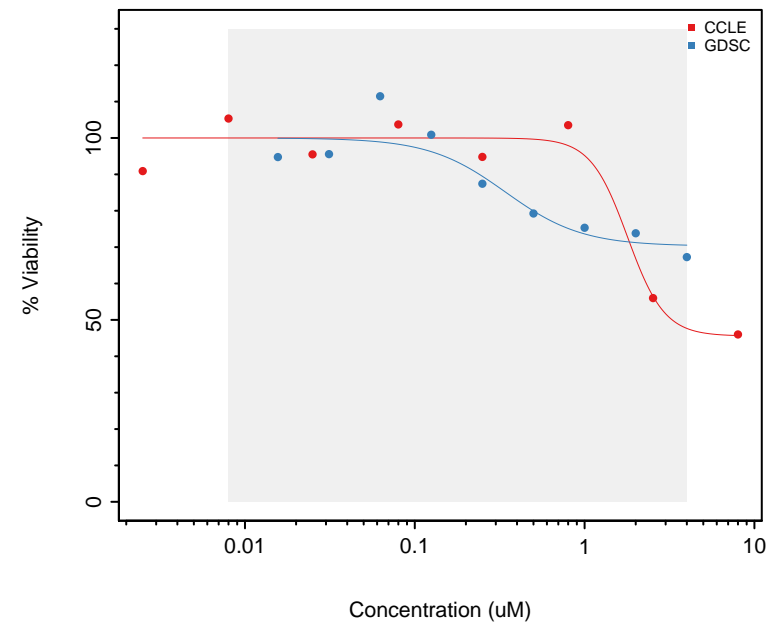

PD-0332991:DK-MG

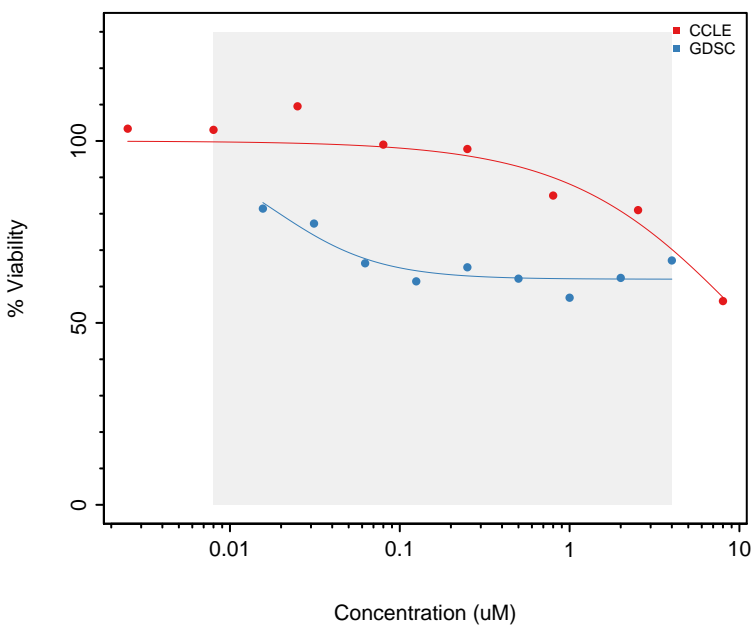

PD-0332991:DMS-114

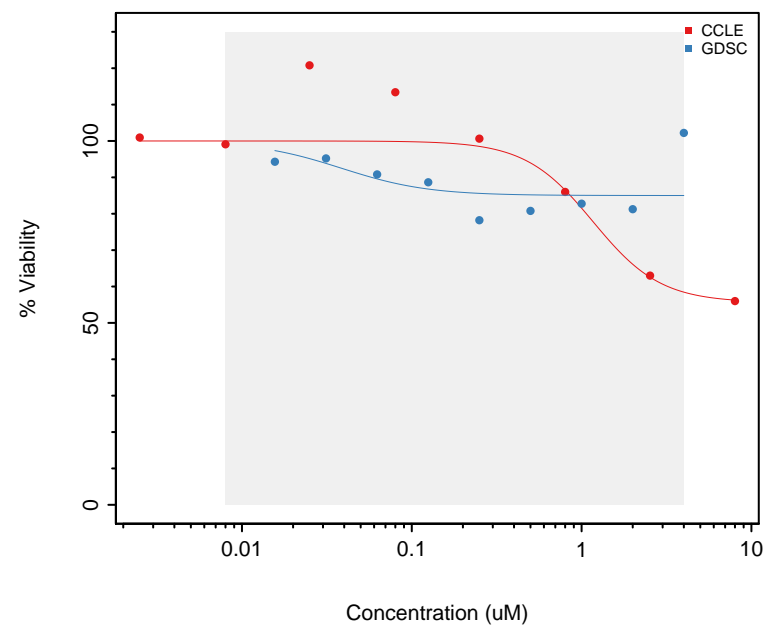

PD-0332991:DOHH-2

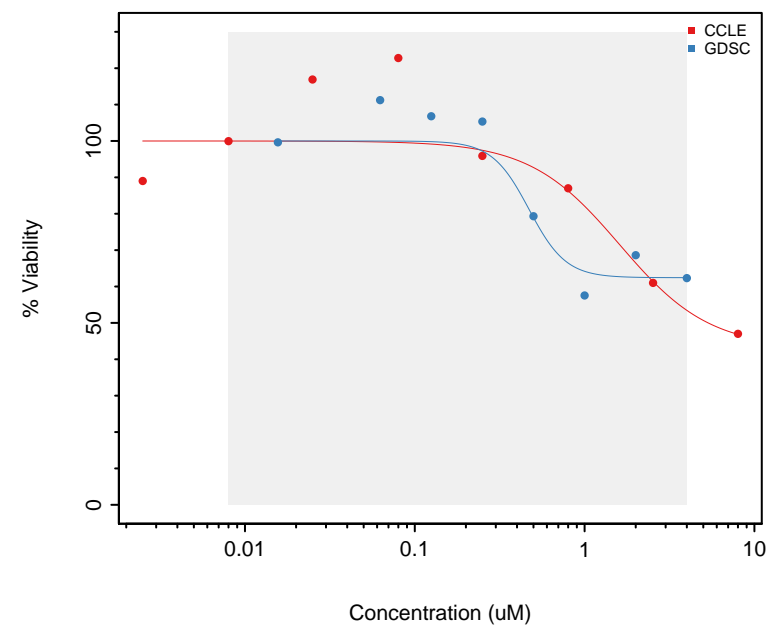

PD-0332991:DU-145

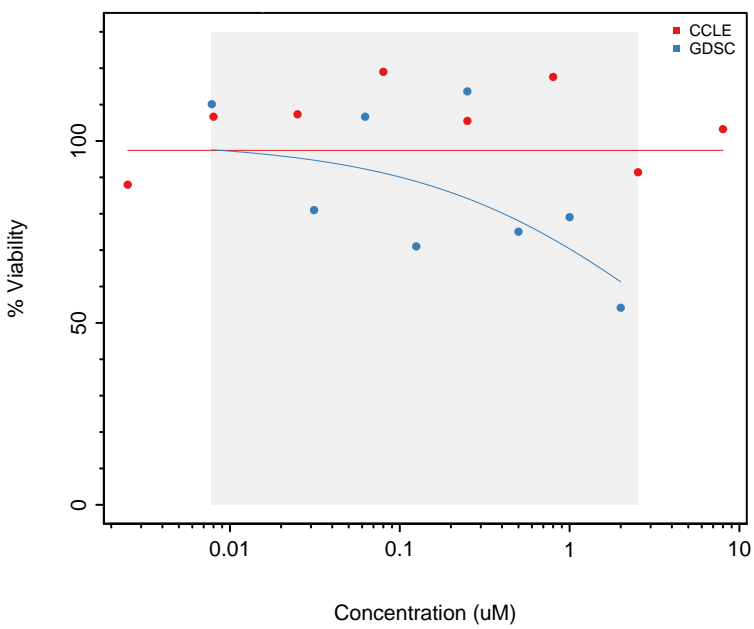

PD-0332991:EB2

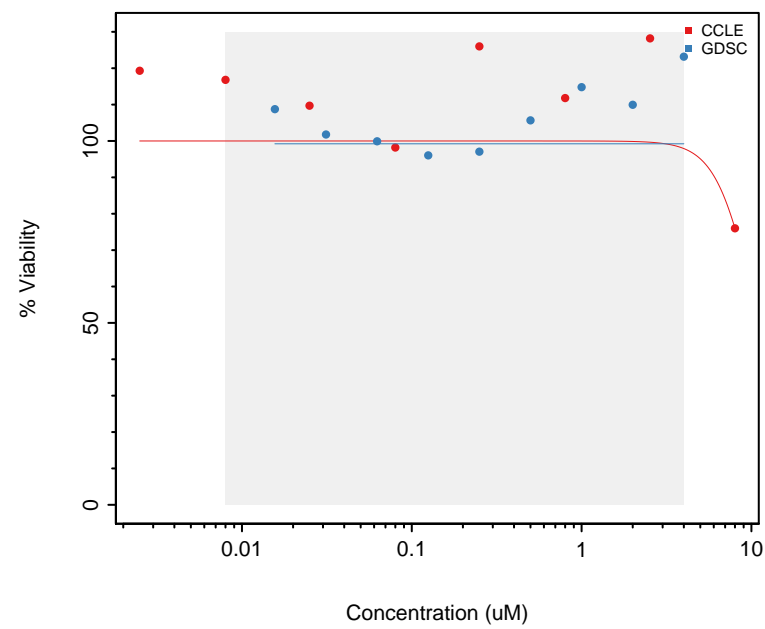

PD-0332991:EFE-184

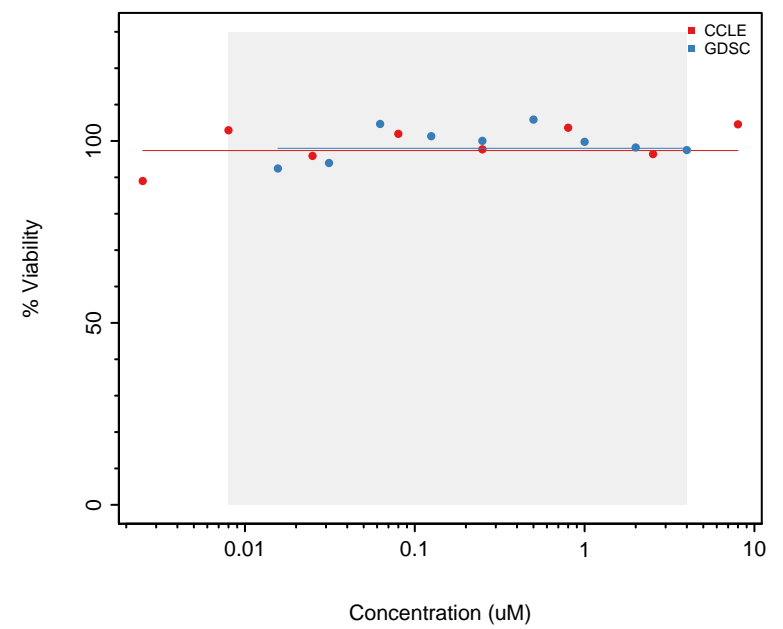

PD-0332991:EFO-21

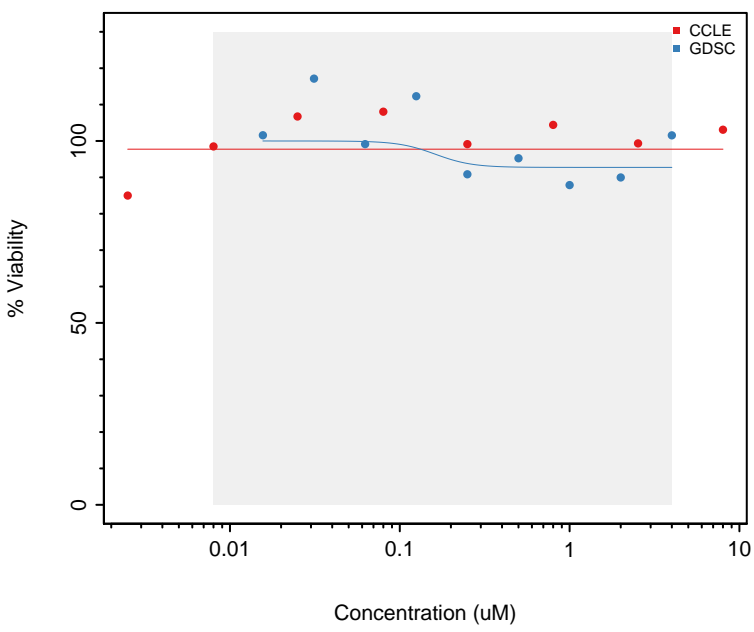

PD-0332991:EFO-27

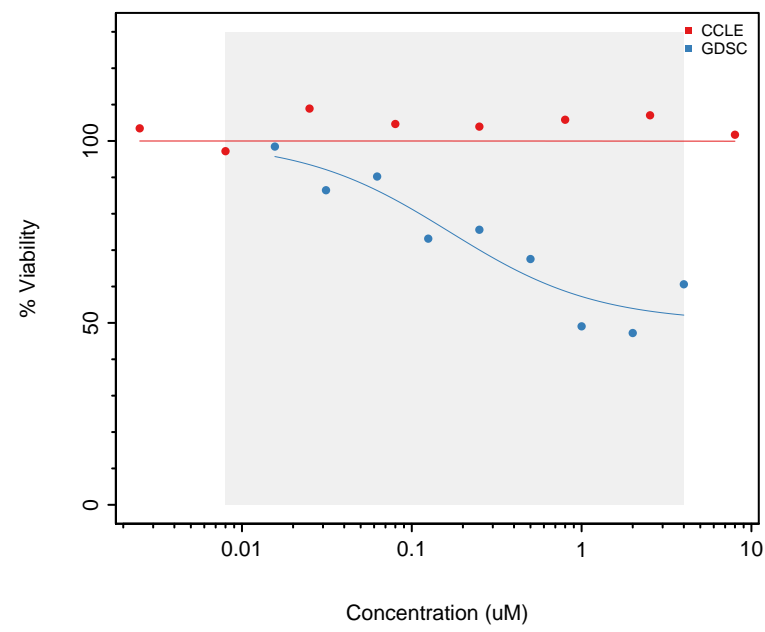

PD-0332991:EM-2

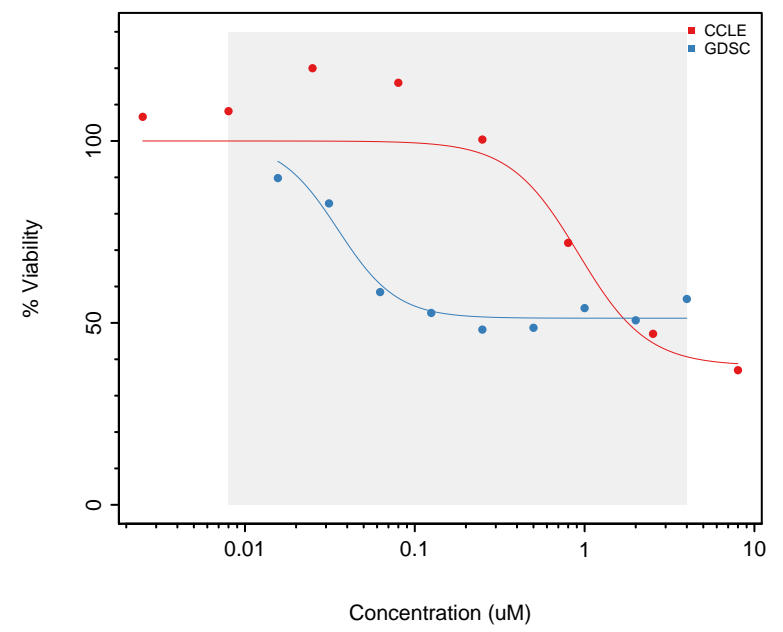

PD-0332991:FADU

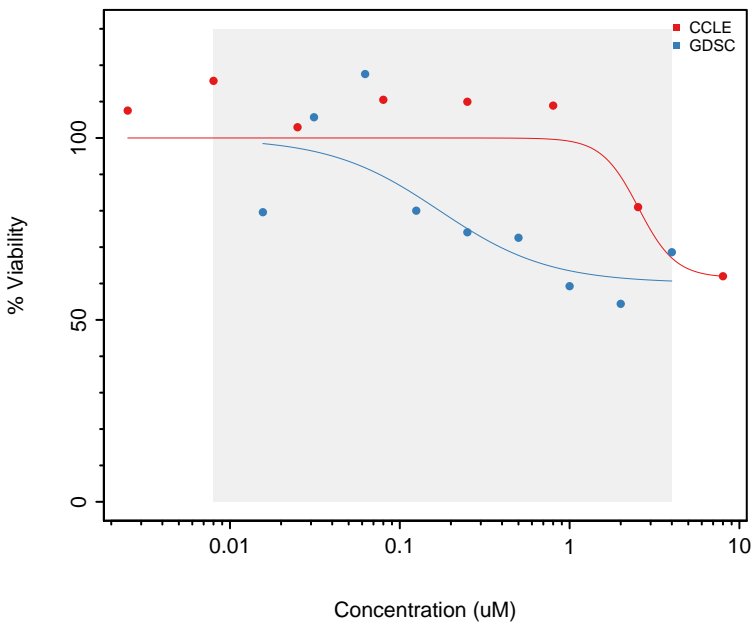

PD-0332991:G-361

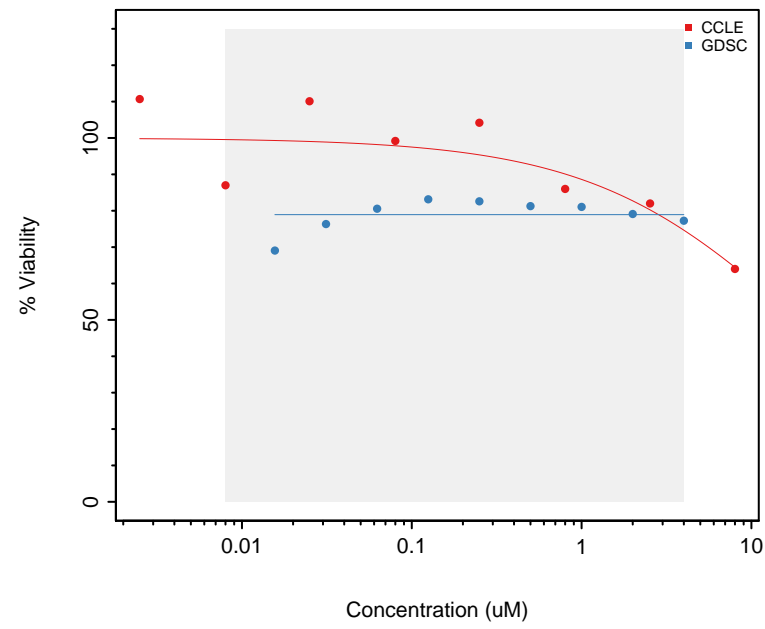

PD-0332991:G-401

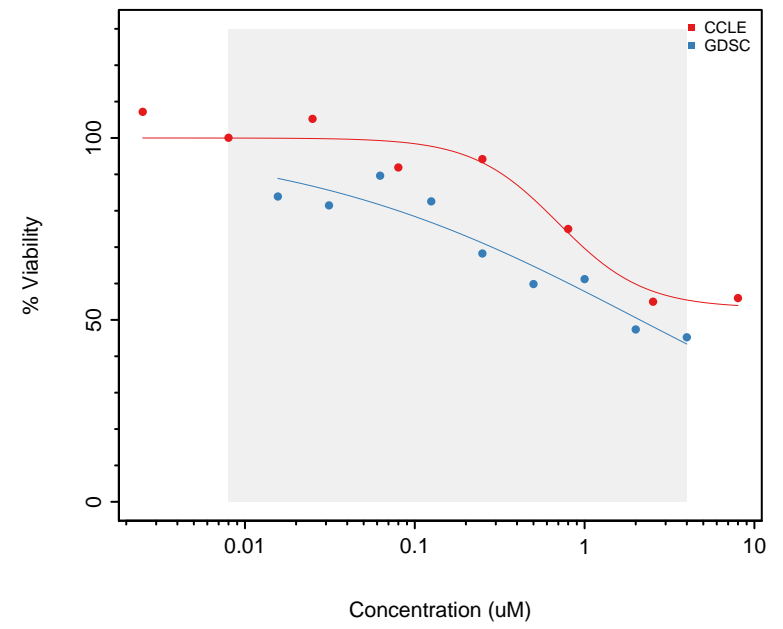

PD-0332991:GB-1

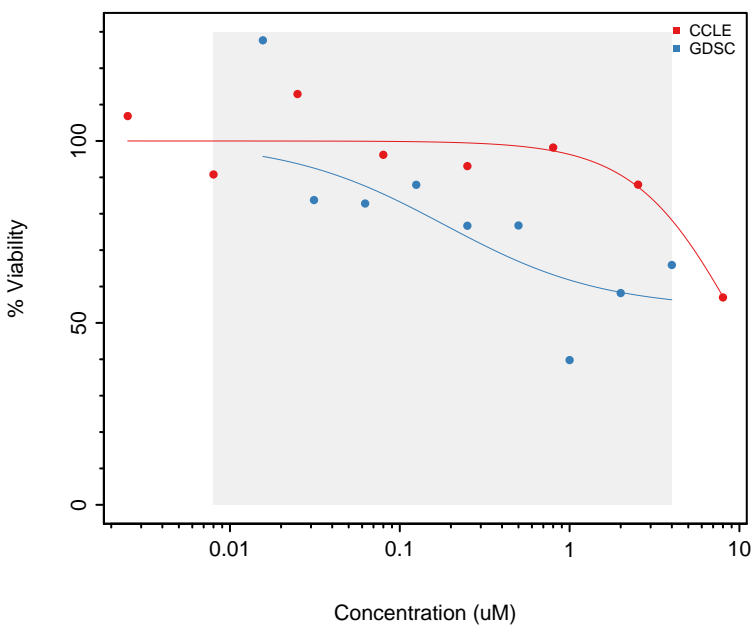

PD-0332991:GCIY

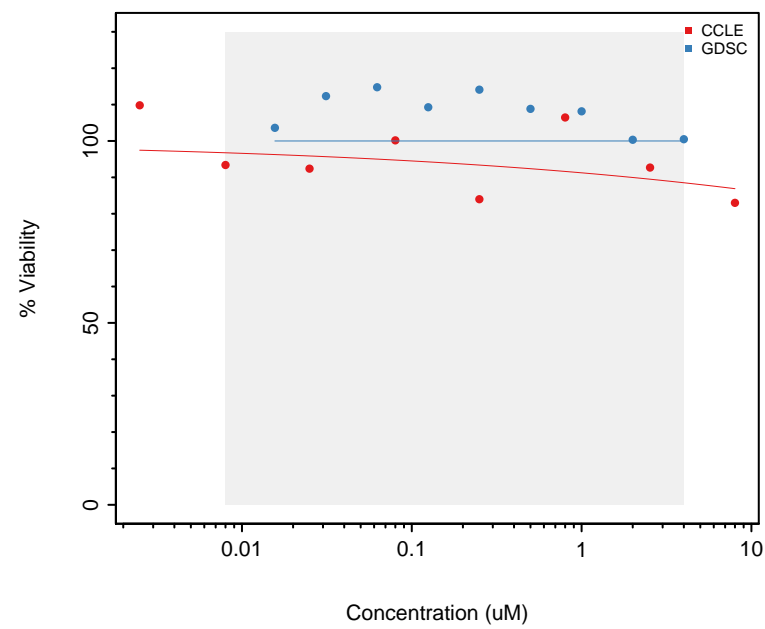

PD-0332991:GCT

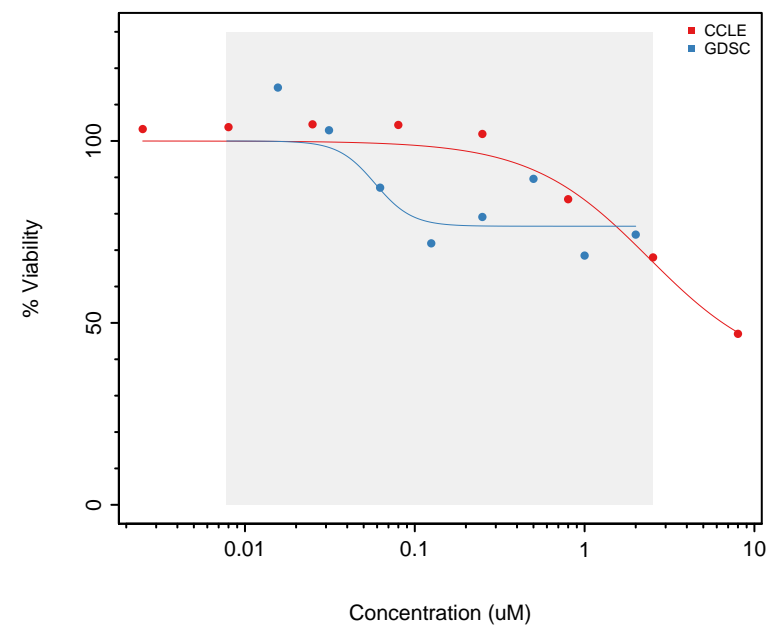

PD-0332991:GMS-10

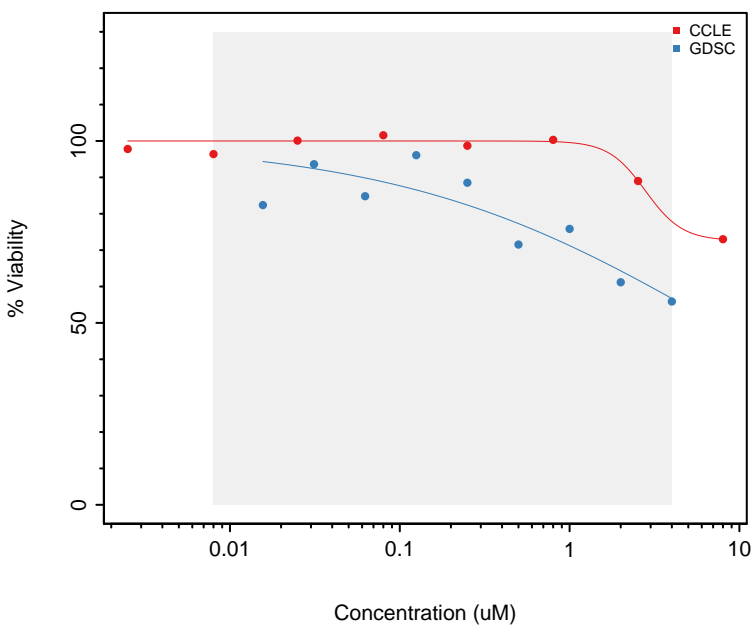

PD-0332991:H4

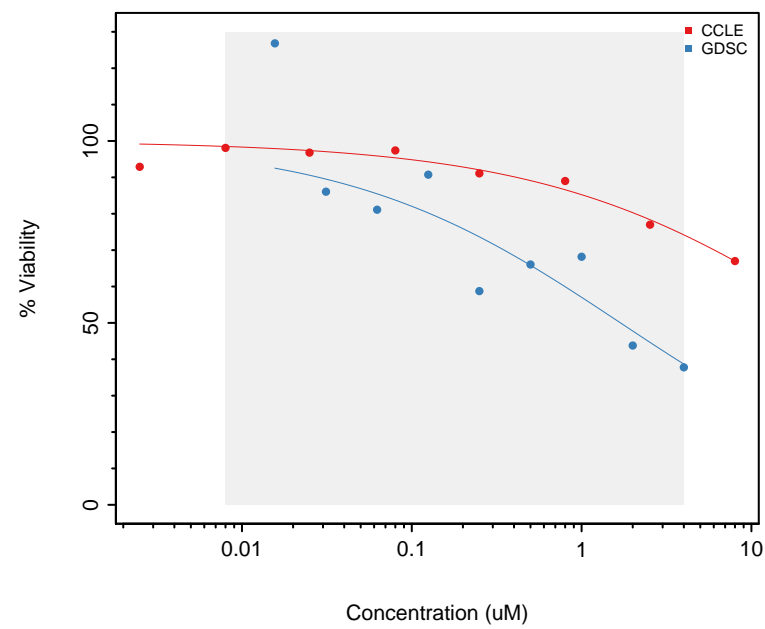

PD-0332991:HCC1187

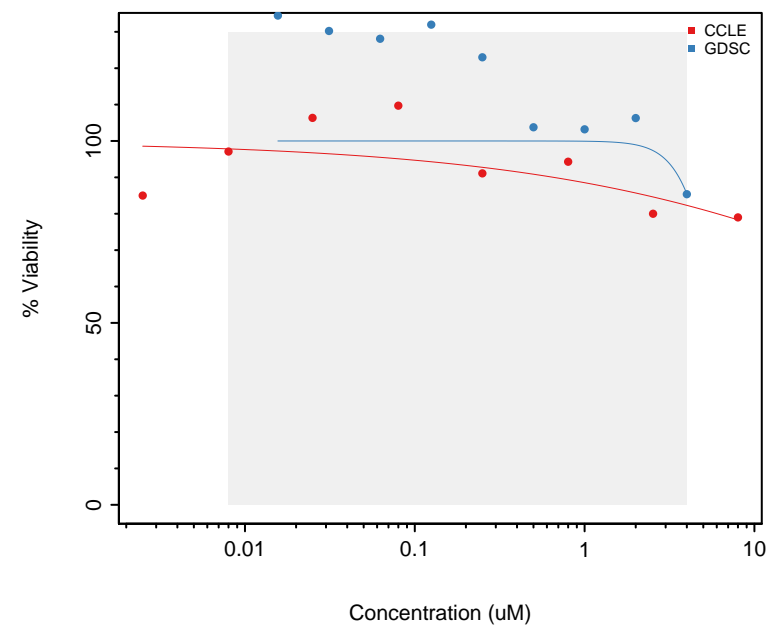



PD-0332991:HT-1197

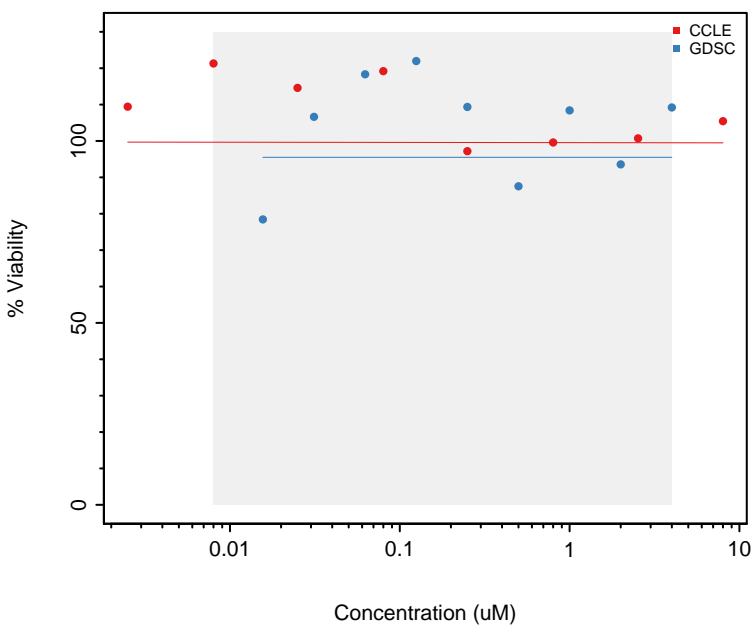

PD-0332991:HT-1376

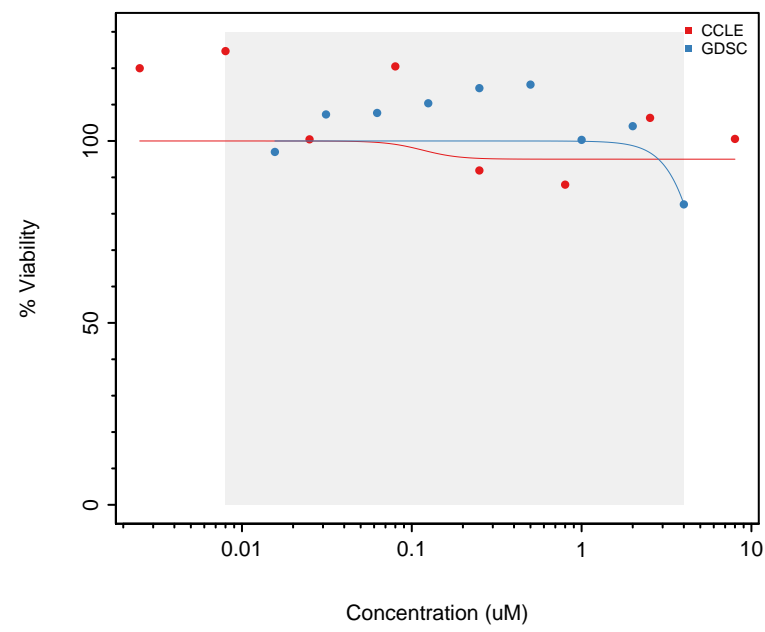

PD-0332991:HT-144

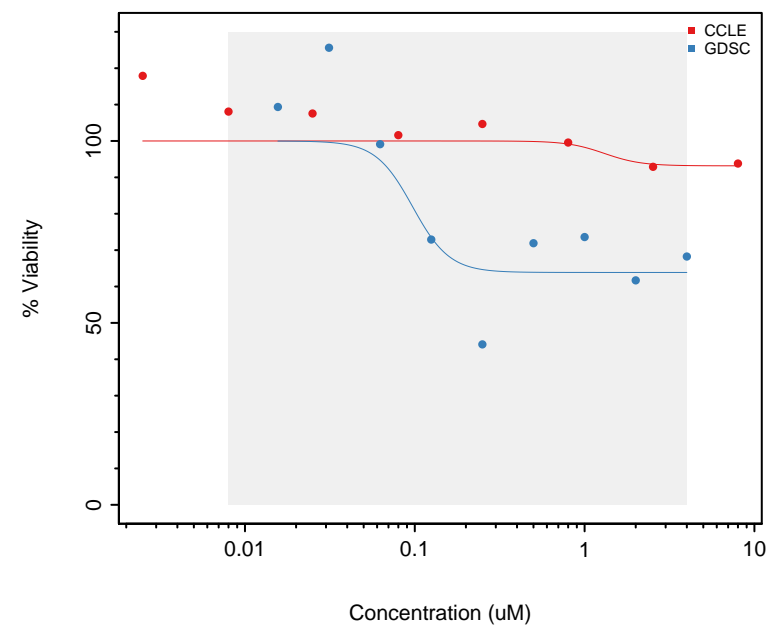

PD-0332991:HT-29

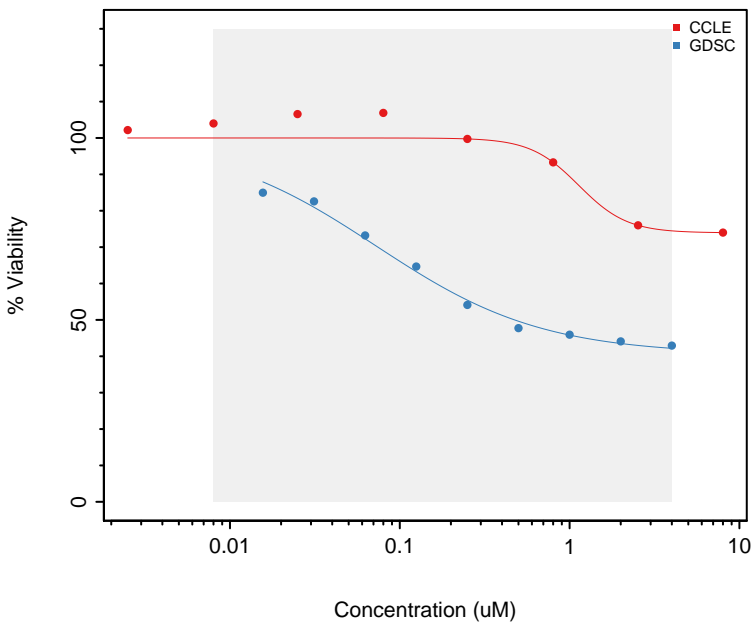

PD-0332991:HuCCT1

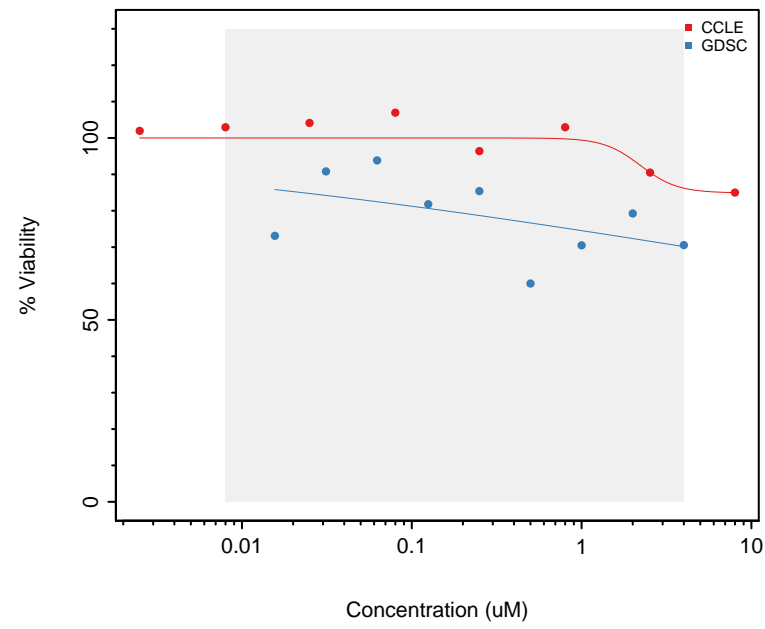

PD-0332991:HuP-T3

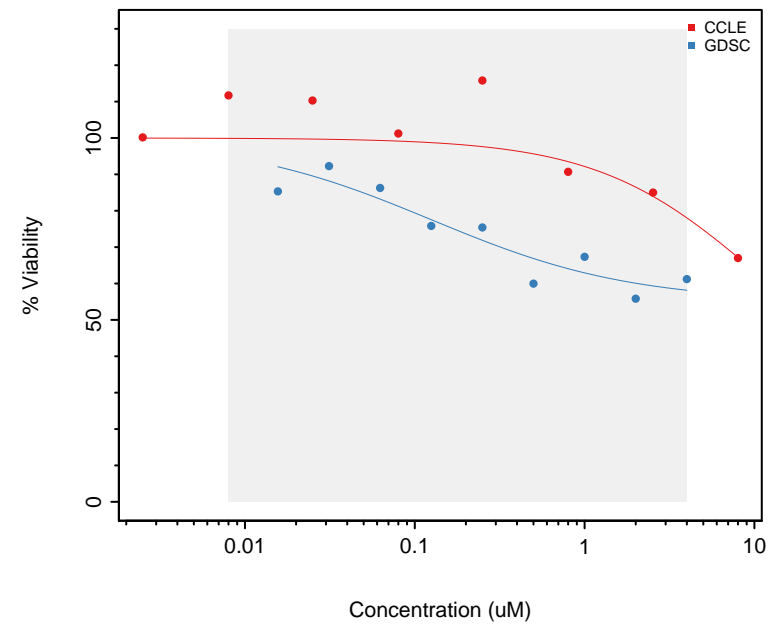

PD-0332991:HuP-T4

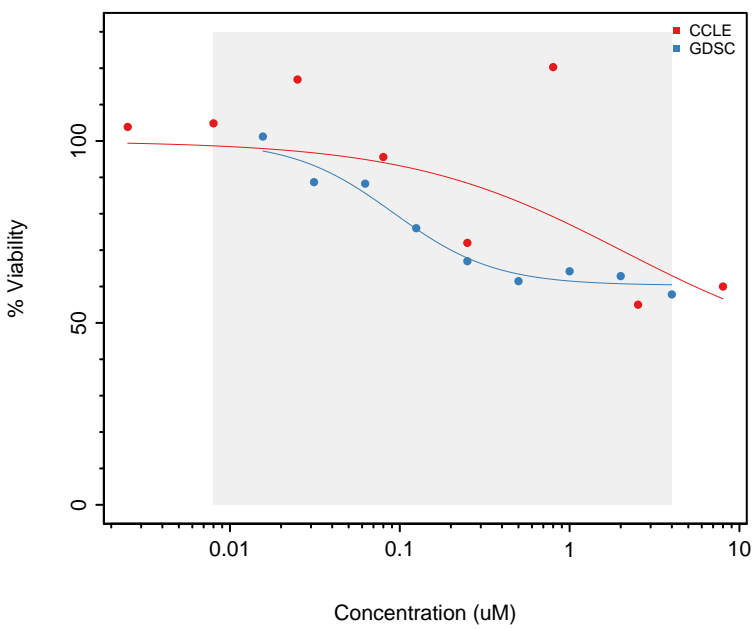

PD-0332991:IA-LM

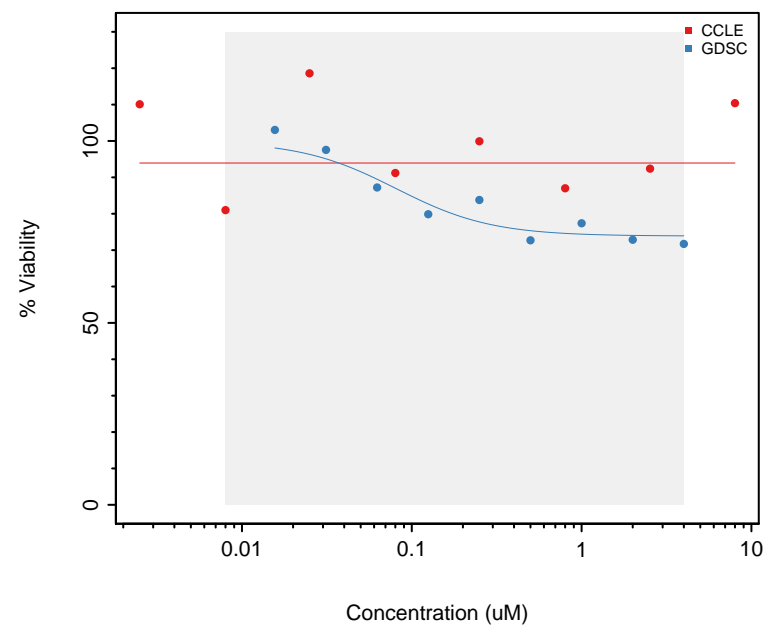

PD-0332991:IGROV-1

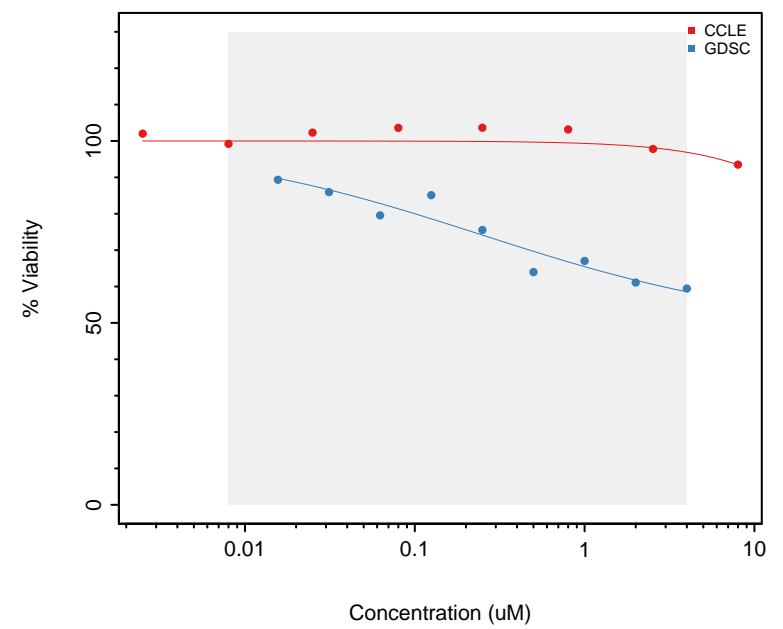

PD-0332991:IPC-298

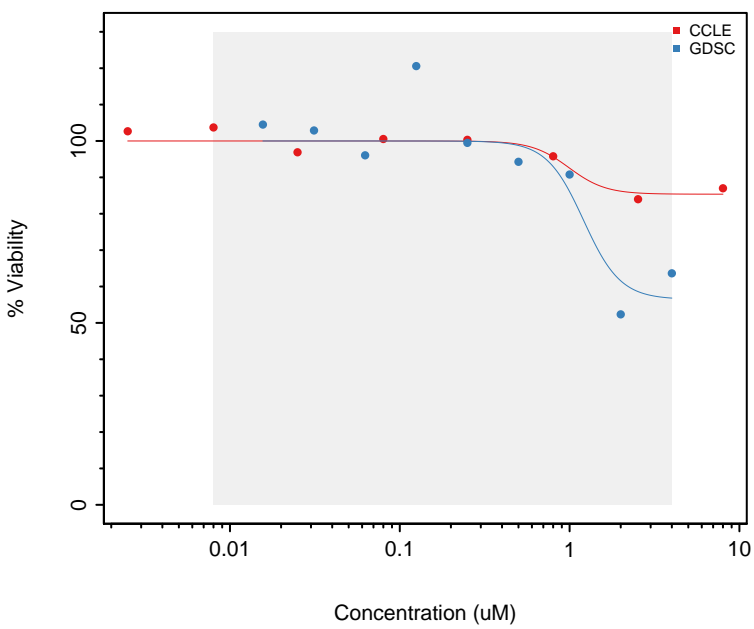

PD-0332991:IST-MES1

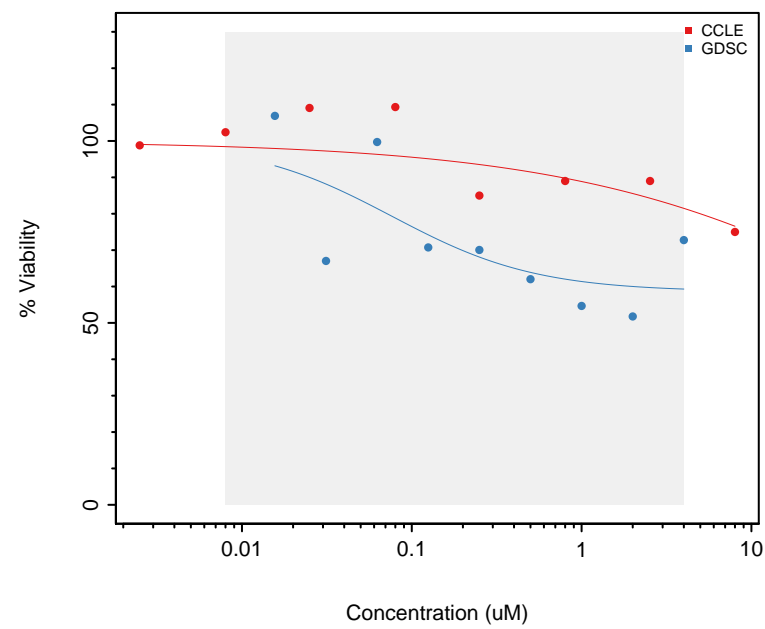

PD-0332991:JVM-3

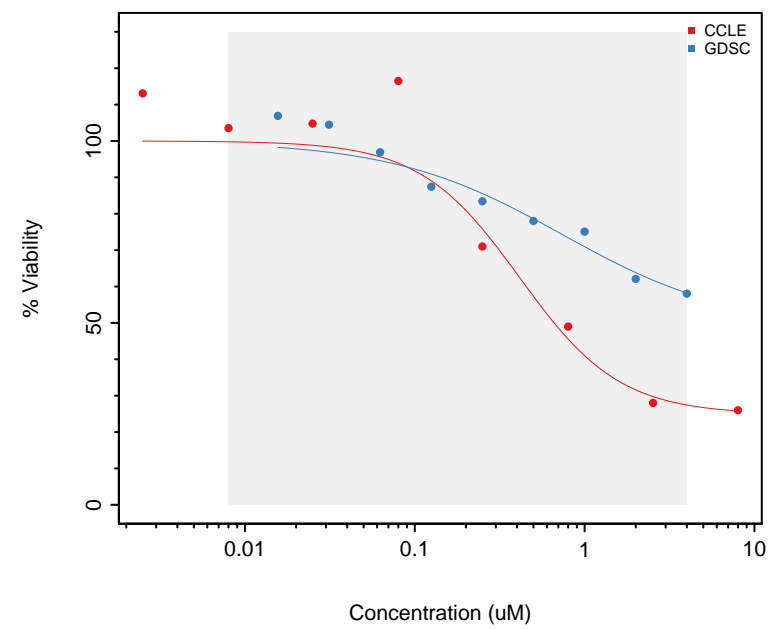

PD-0332991:KARPAS-299

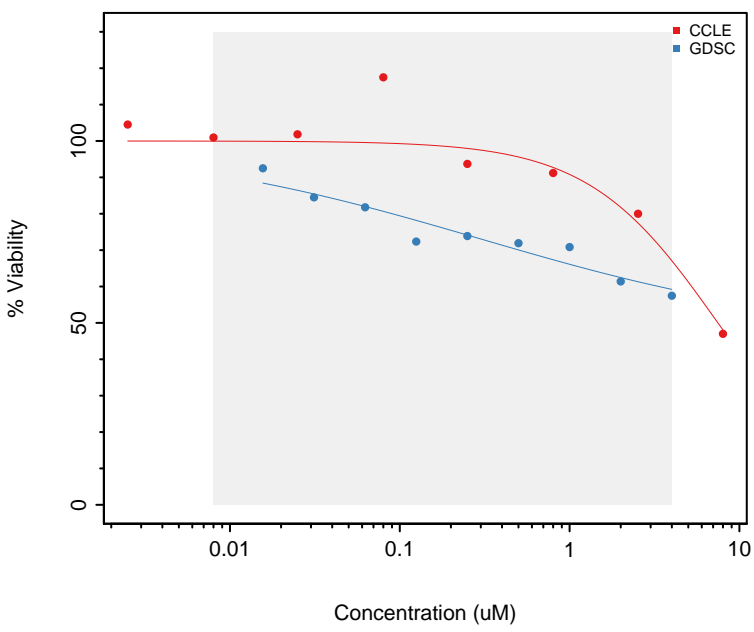

PD-0332991:KARPAS-422

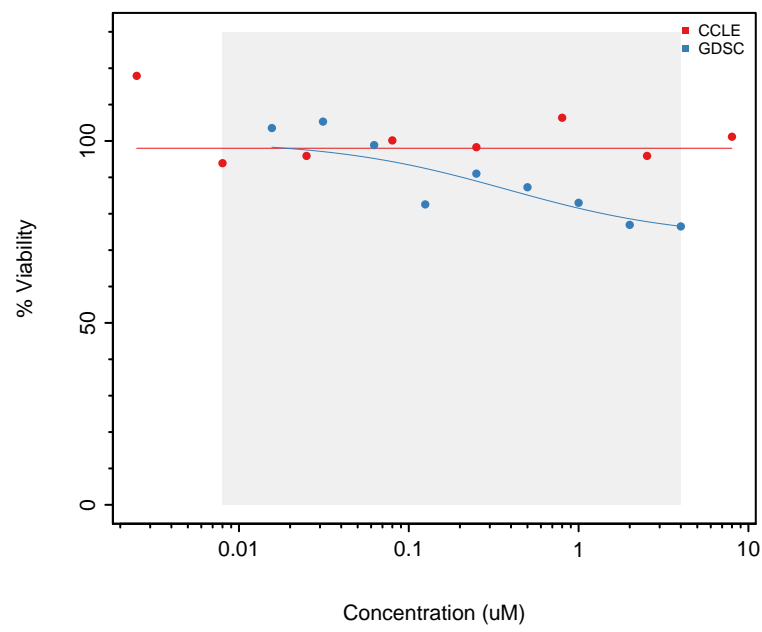

PD-0332991:KG-1

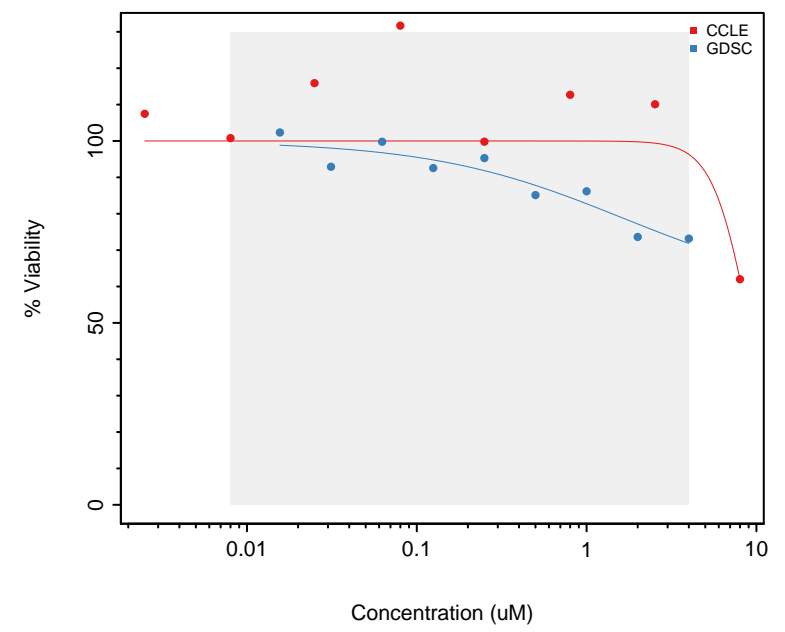

PD-0332991:KLE

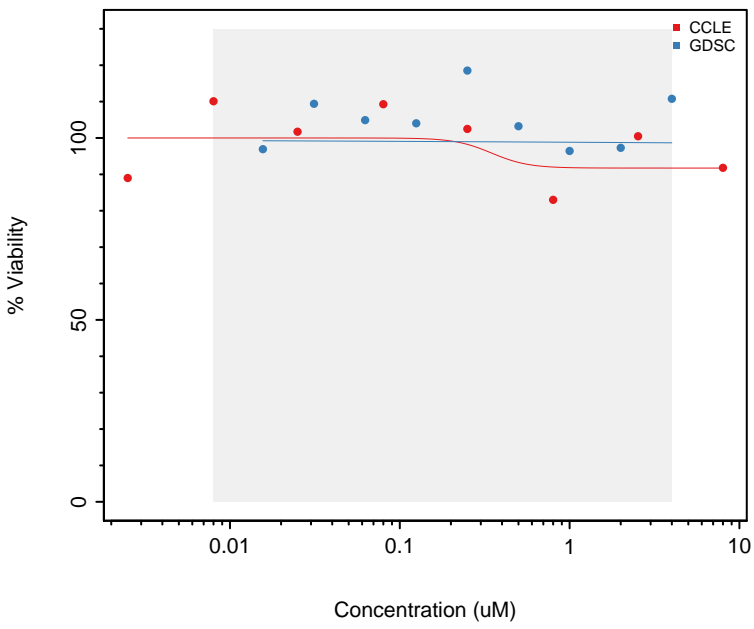

PD-0332991:KNS-42

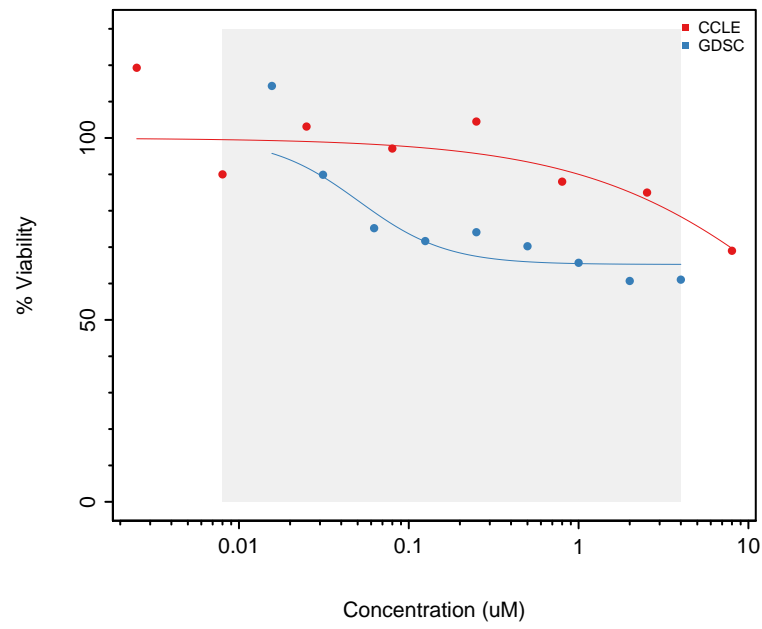

PD-0332991:KNS-81-FD

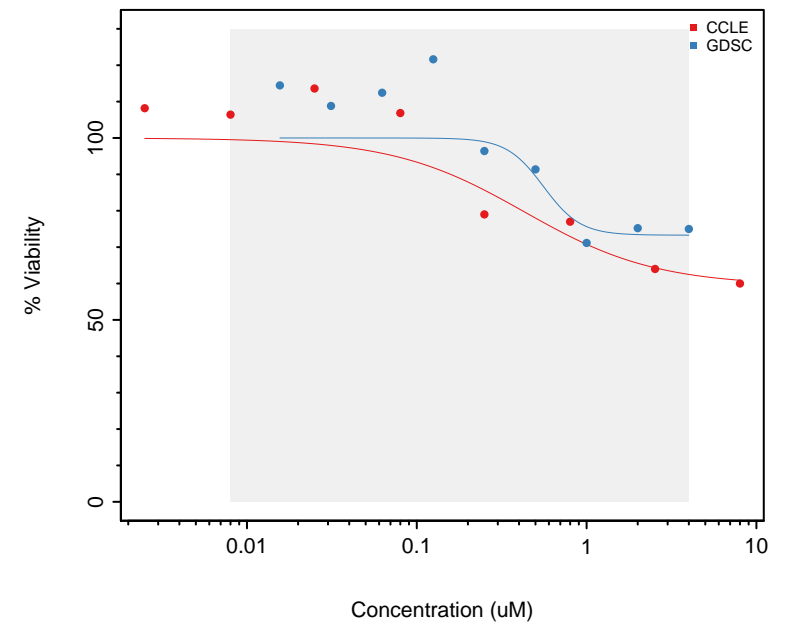

PD-0332991:KU812

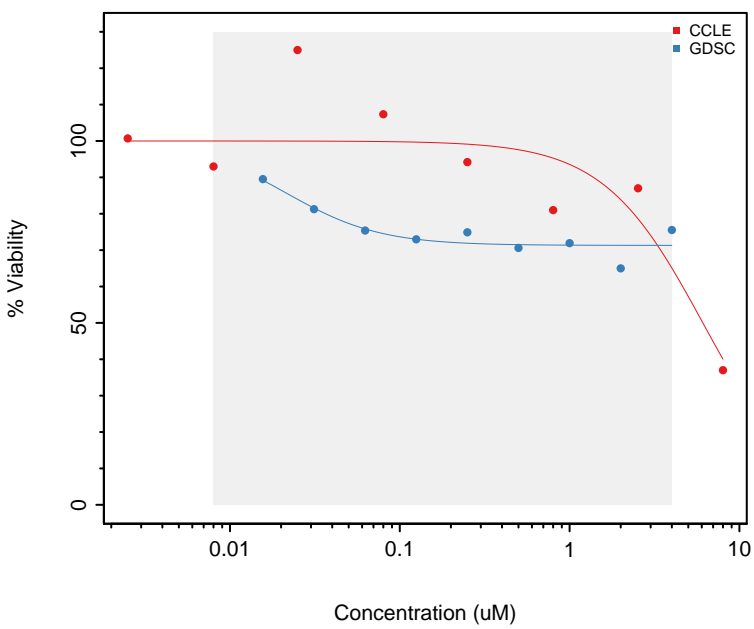

PD-0332991:KURAMOCHI

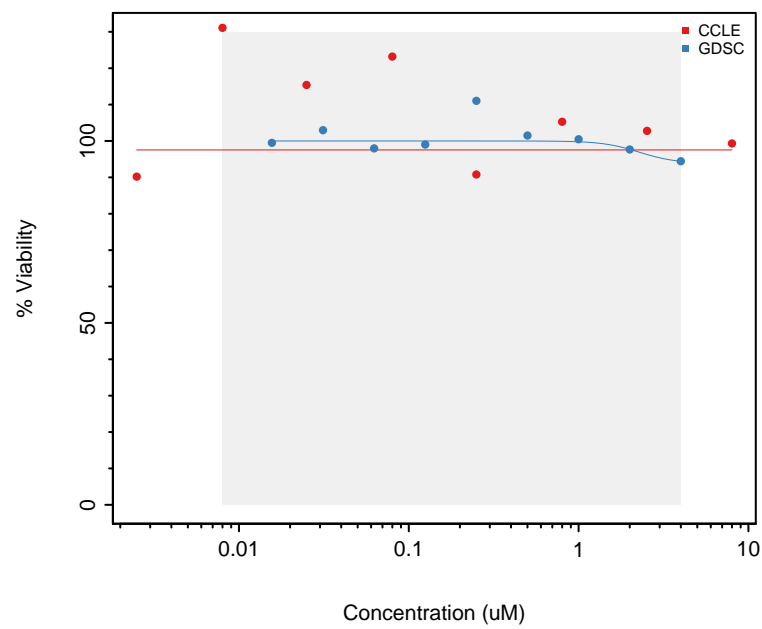

PD-0332991:KYSE-410

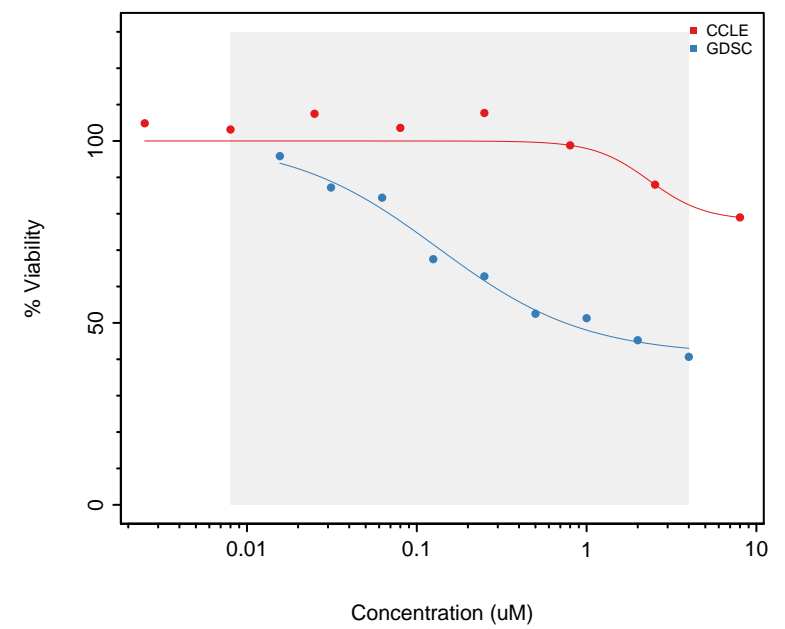

PD-0332991:L-363

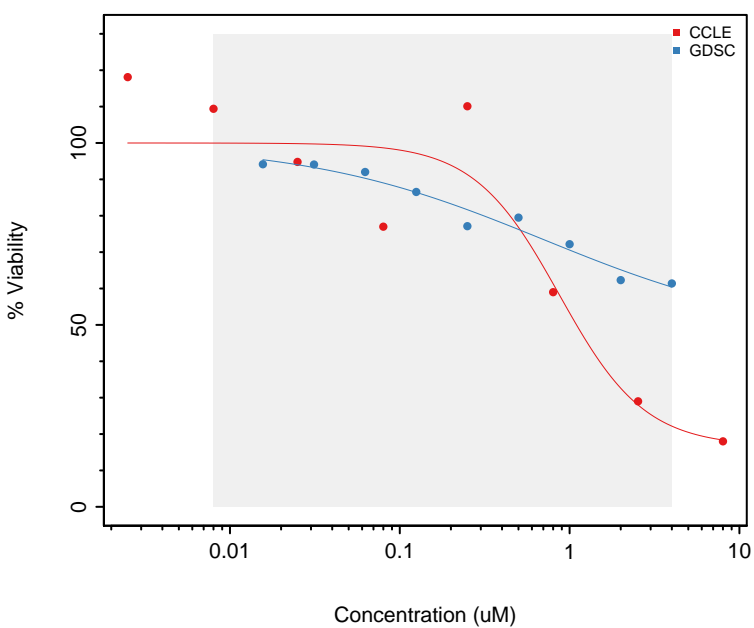

PD-0332991:L-428

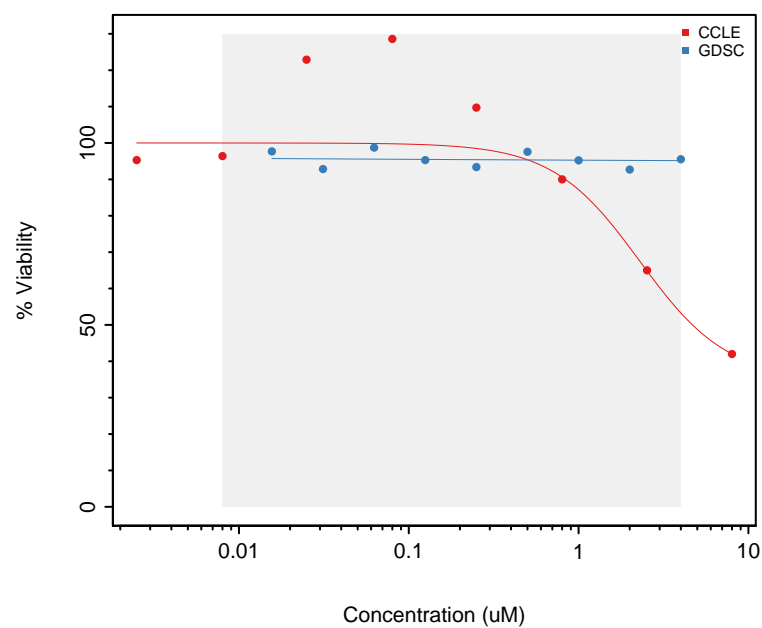

PD-0332991:LCLC-103H

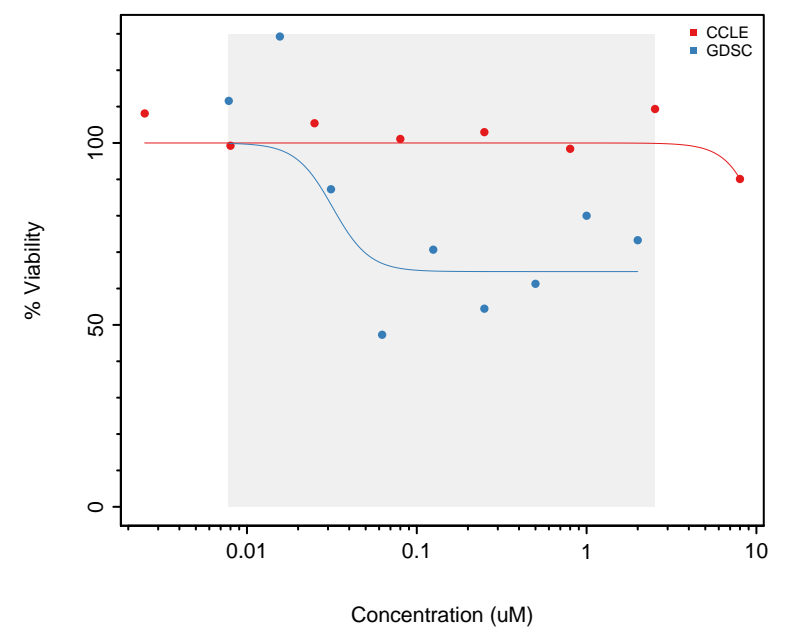





PD-0332991:MEG-01

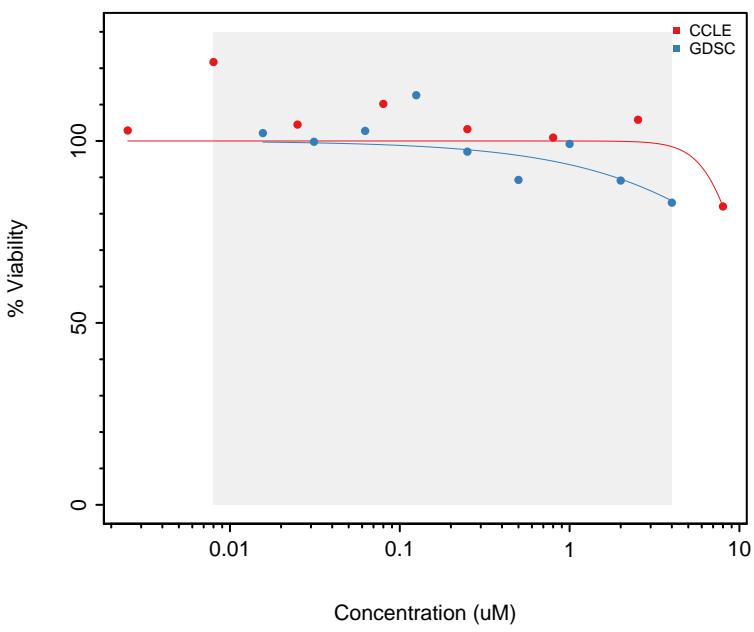

PD-0332991:MEL-HO

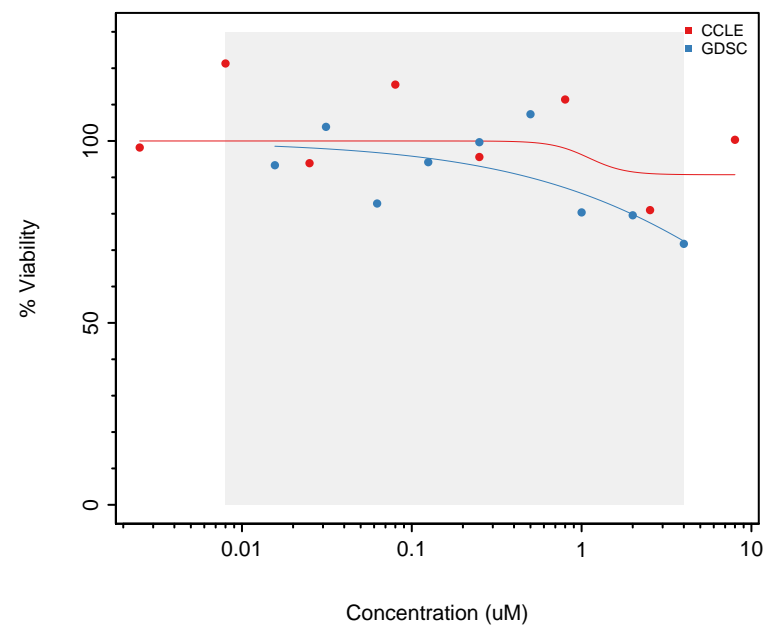

PD-0332991:MES-SA

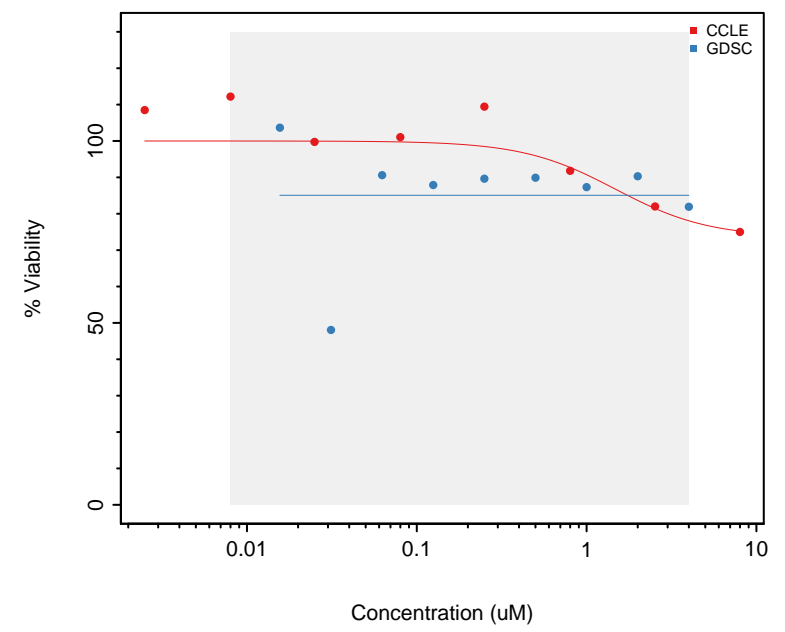

PD-0332991:Mewo

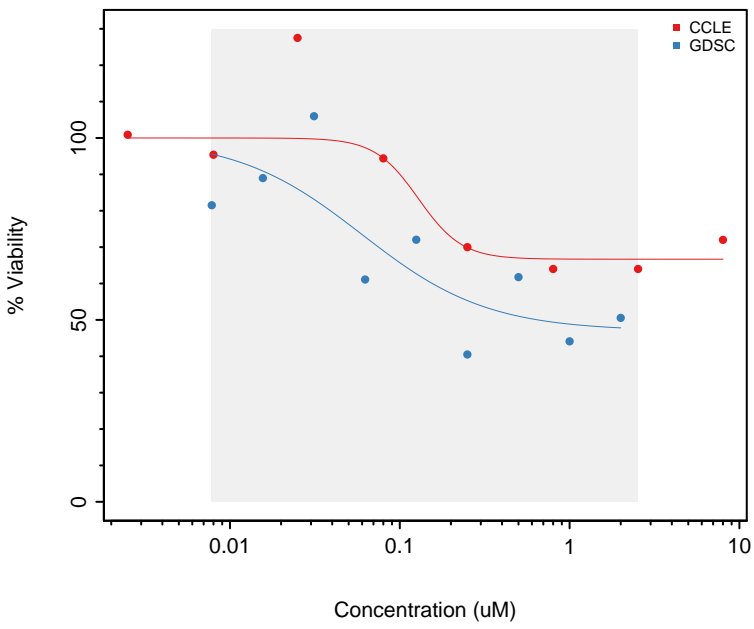

PD-0332991:MFE-280

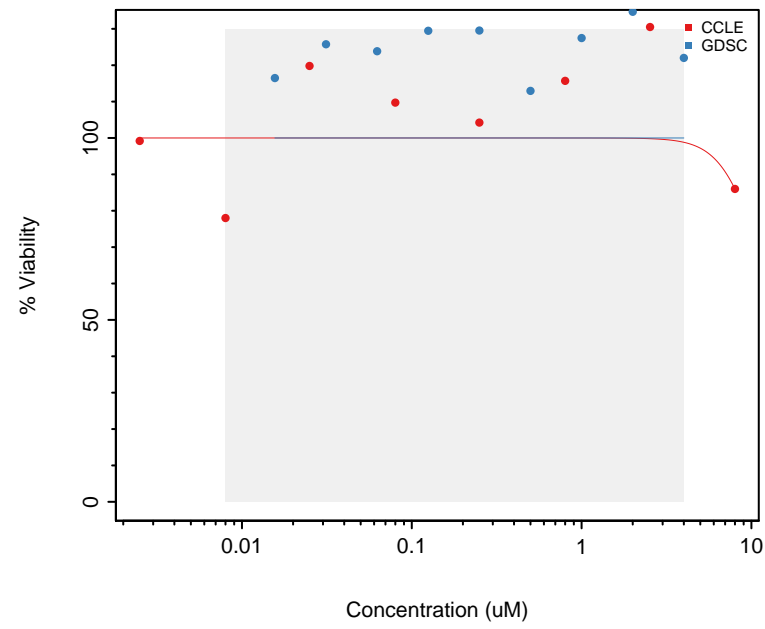

PD-0332991:MG-63

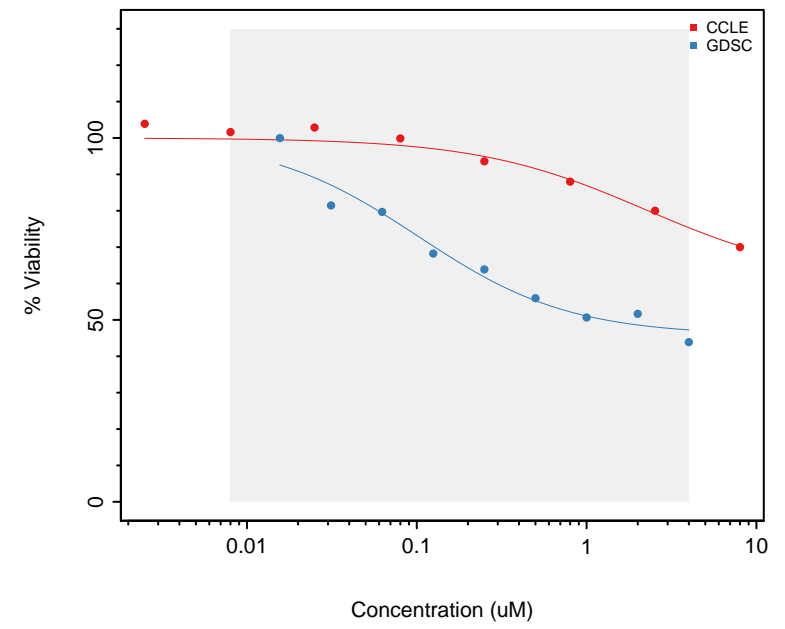

PD-0332991:MHH-ES-1

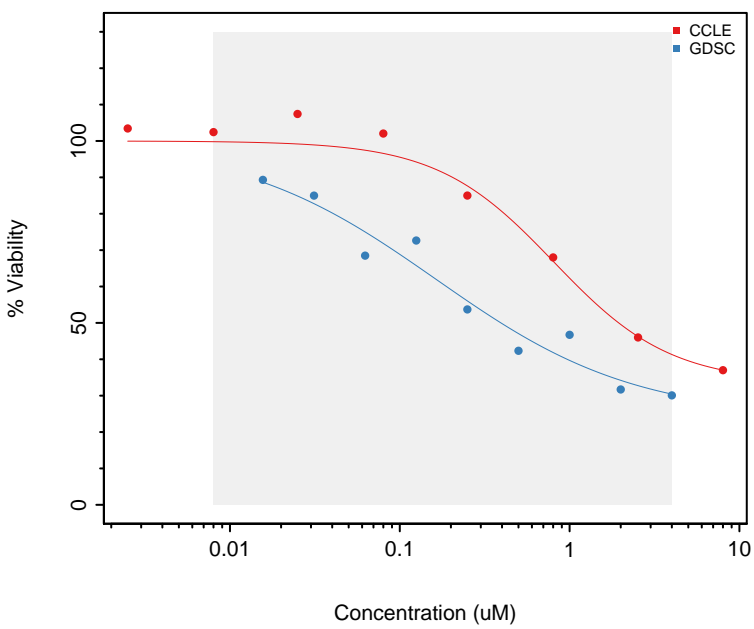

PD-0332991:MIA-PaCa-2

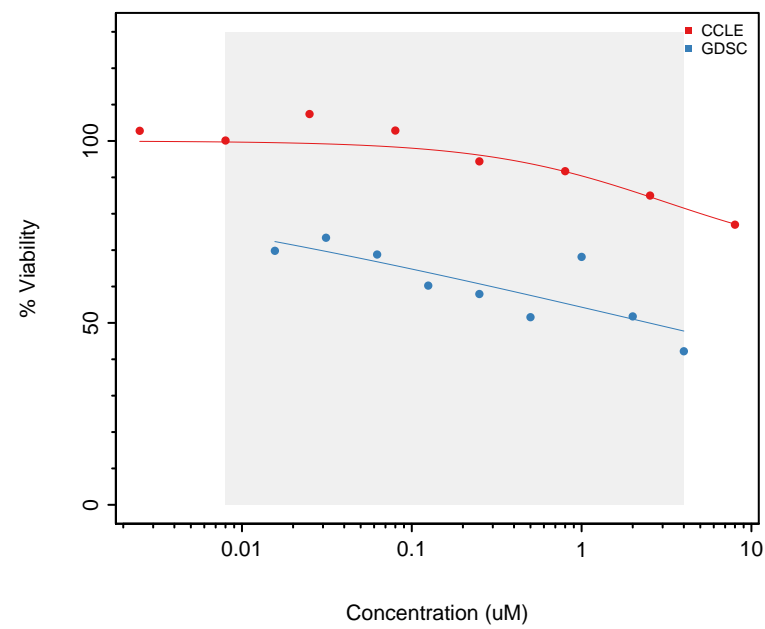

PD-0332991:MOLT-16

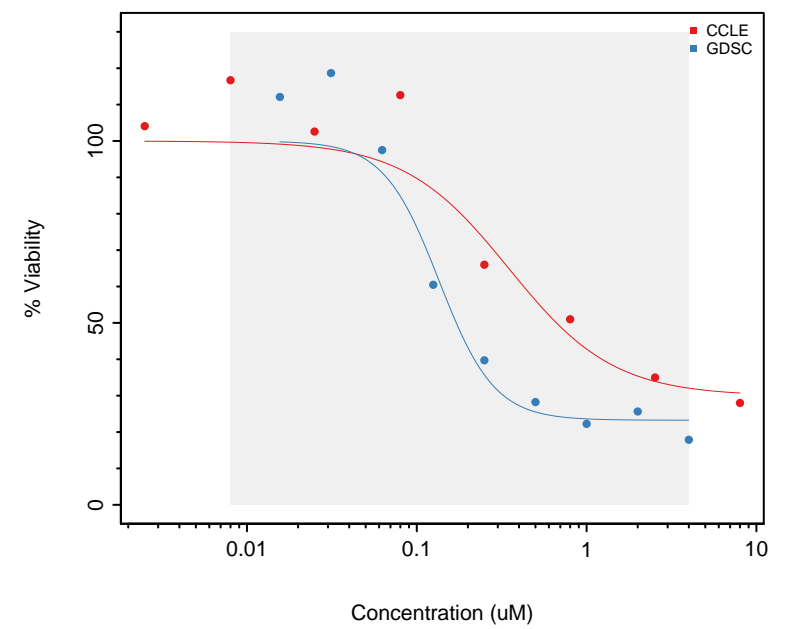

PD-0332991:MPP-89

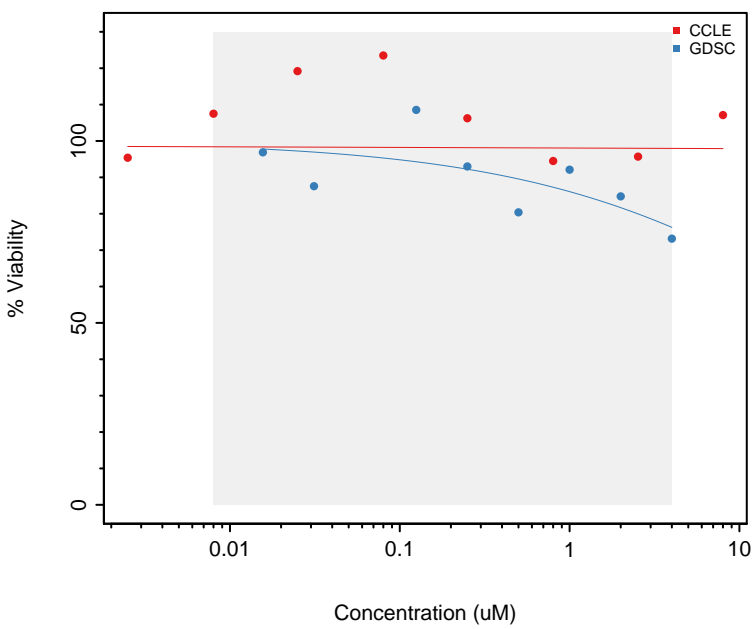

PD-0332991:MSTO-211H

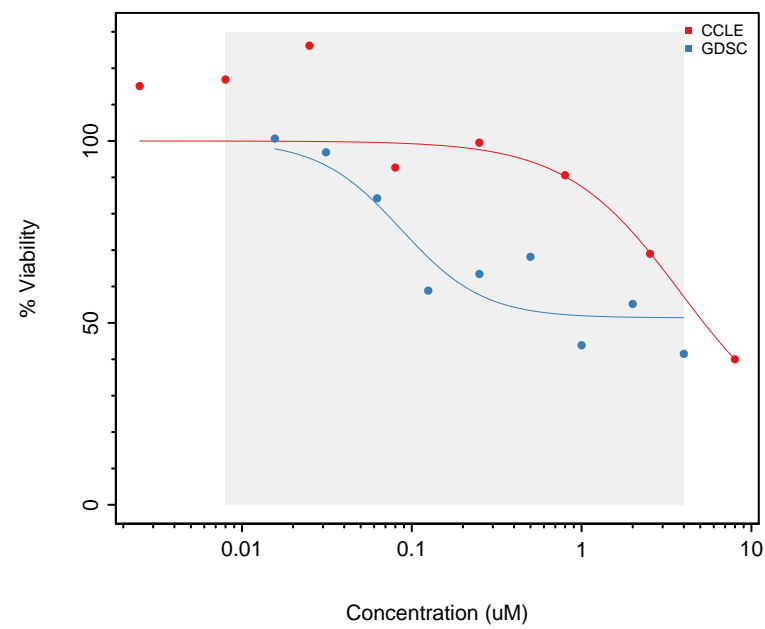

PD-0332991:NCI-H1048

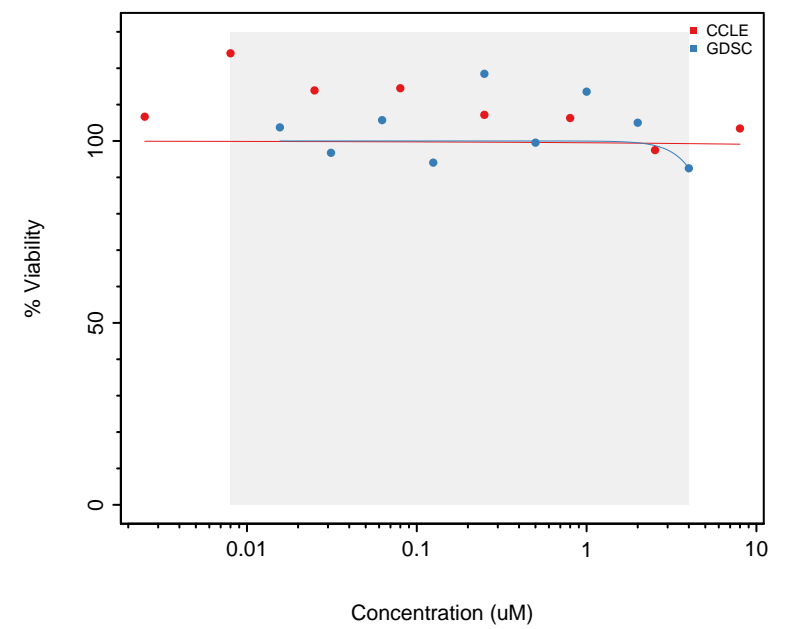





PD-0332991:NCI-H661

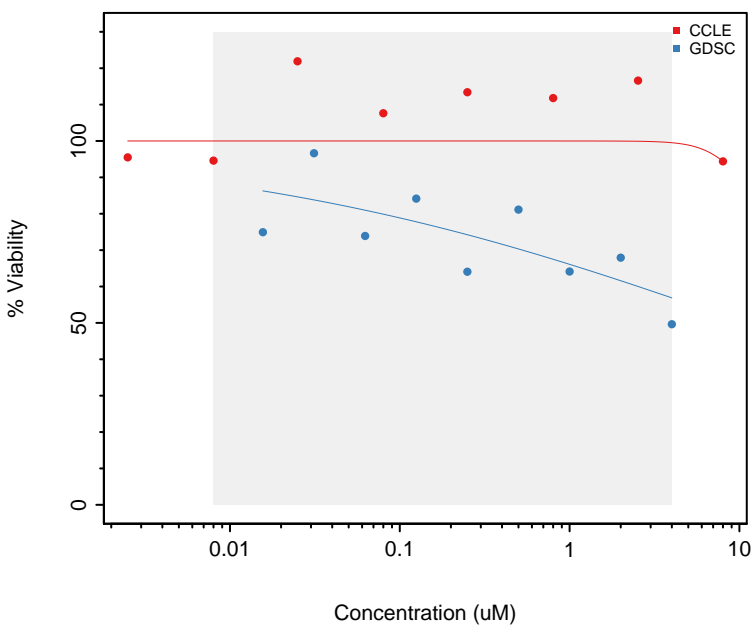

PD-0332991:NCI-H747

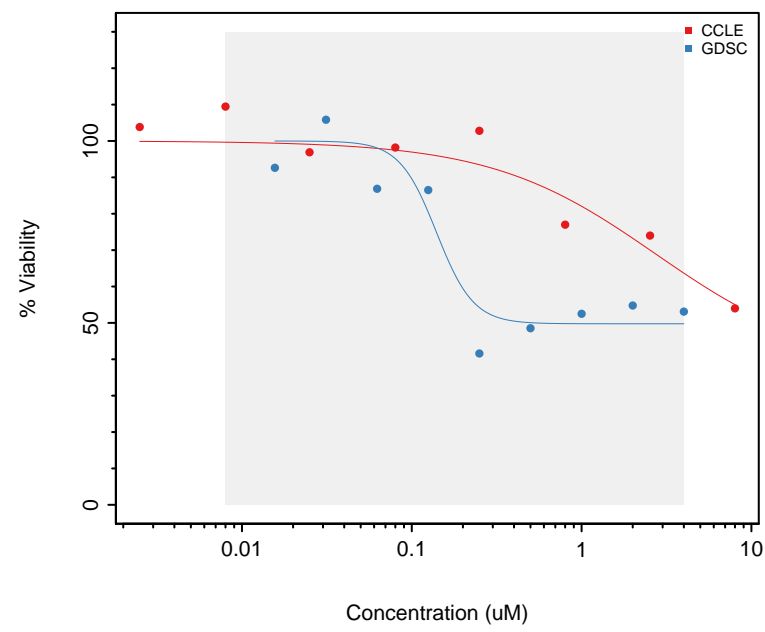

PD-0332991:NCI-H810

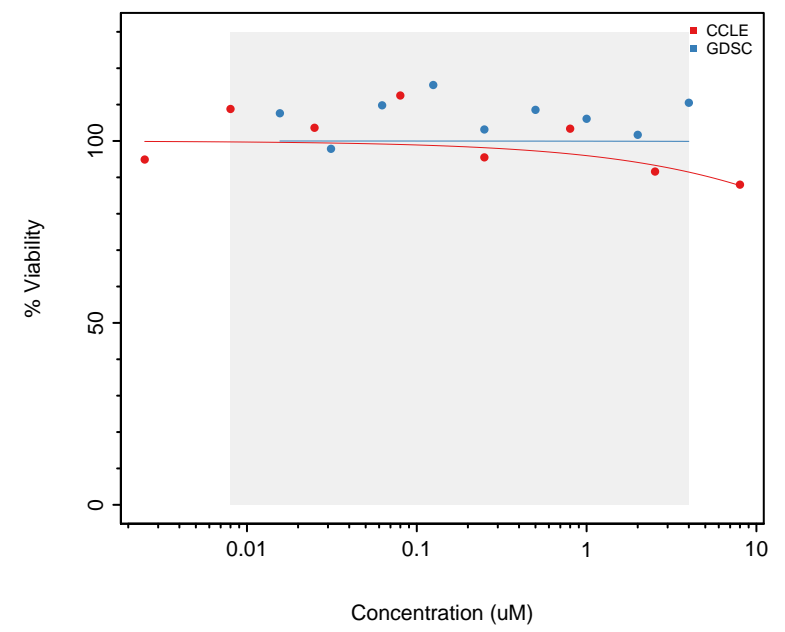

PD-0332991:NCI-N87

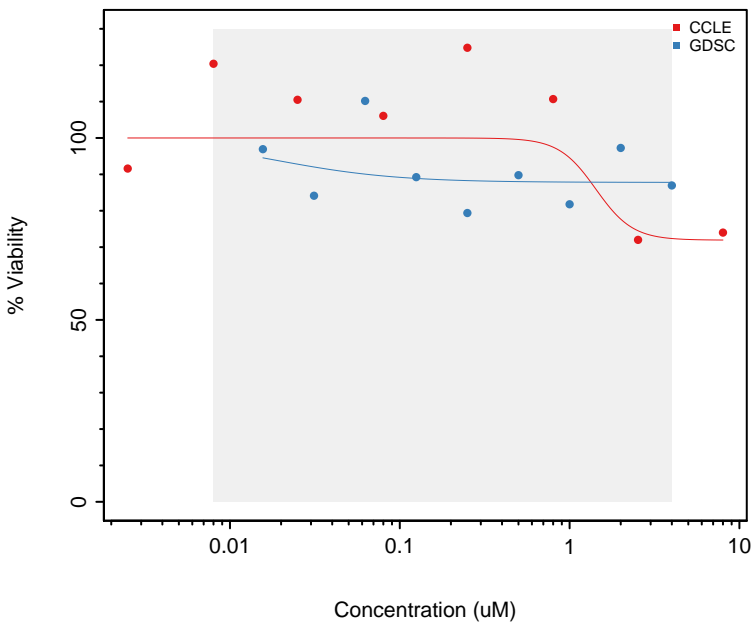

PD-0332991:OVCAR-3

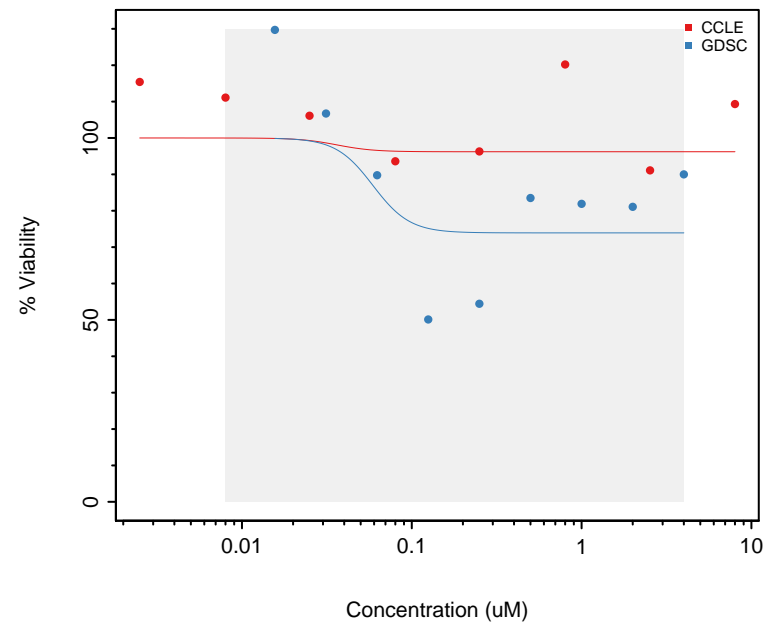

PD-0332991:NUGC-3

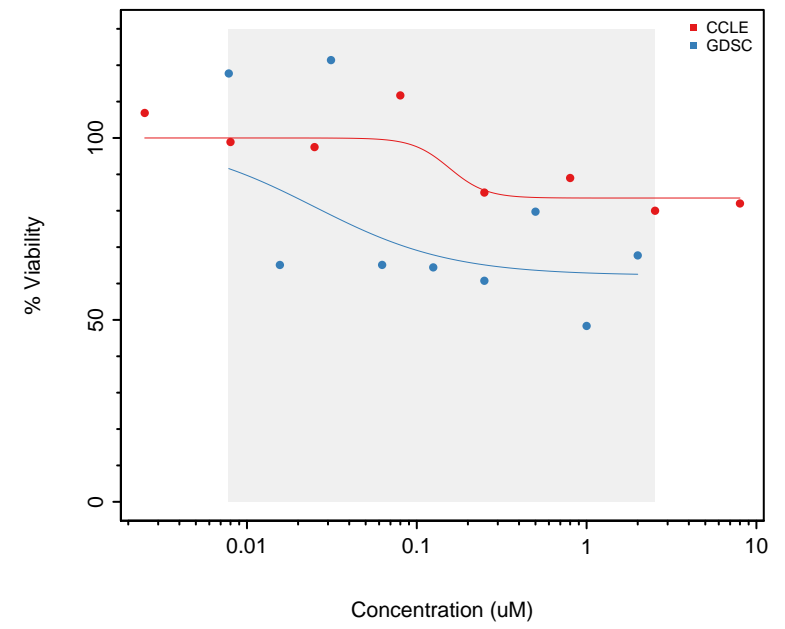

PD-0332991:OC-314

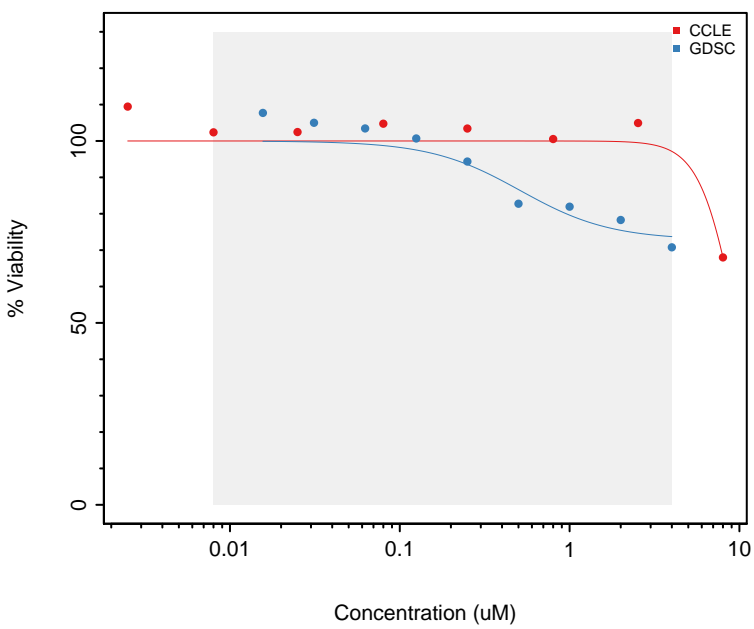

PD-0332991:OCI-AML2

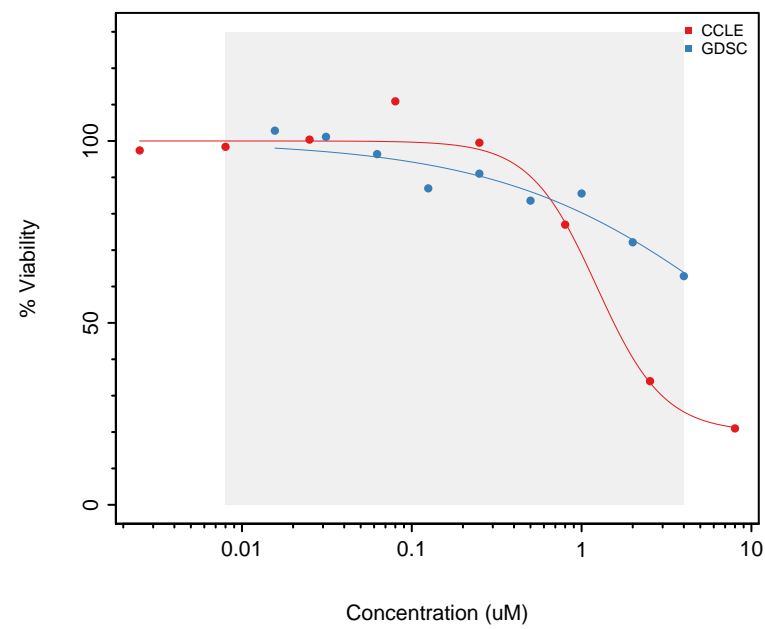

PD-0332991:OE33

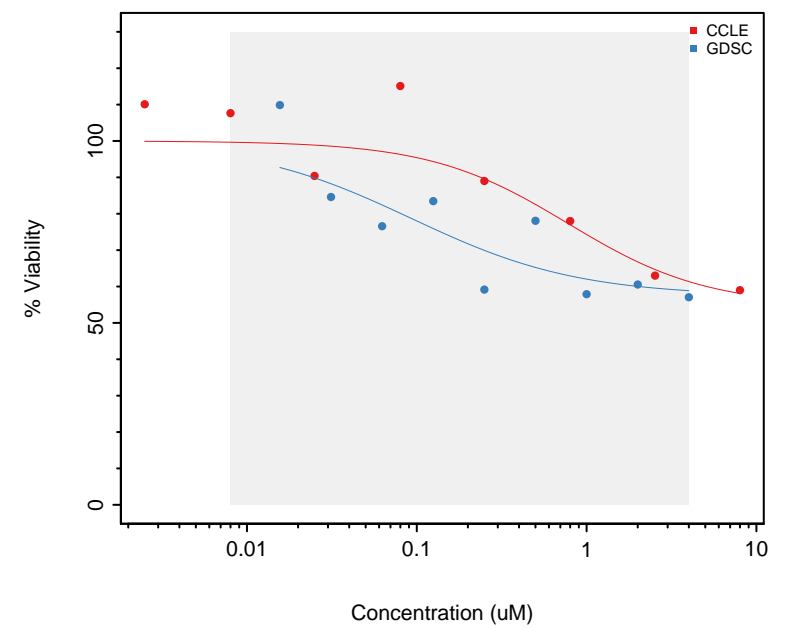

PD-0332991:ONS-76

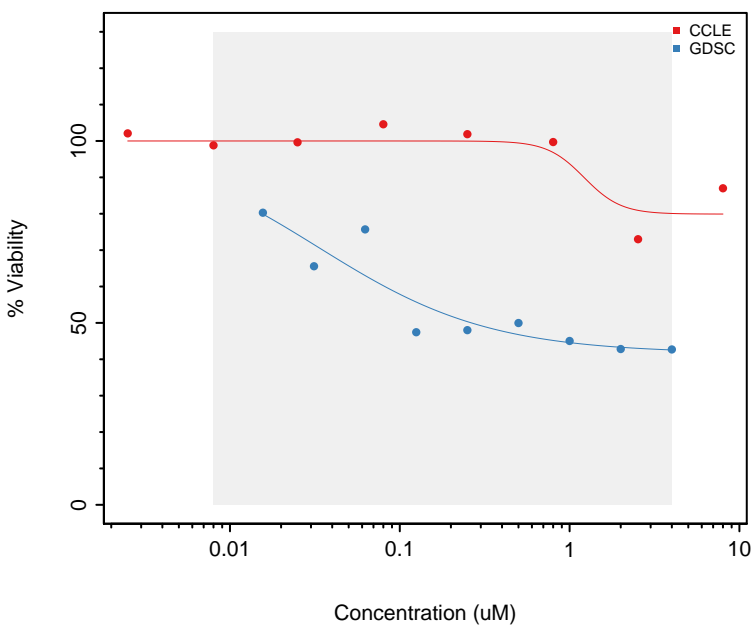

PD-0332991:OPM-2

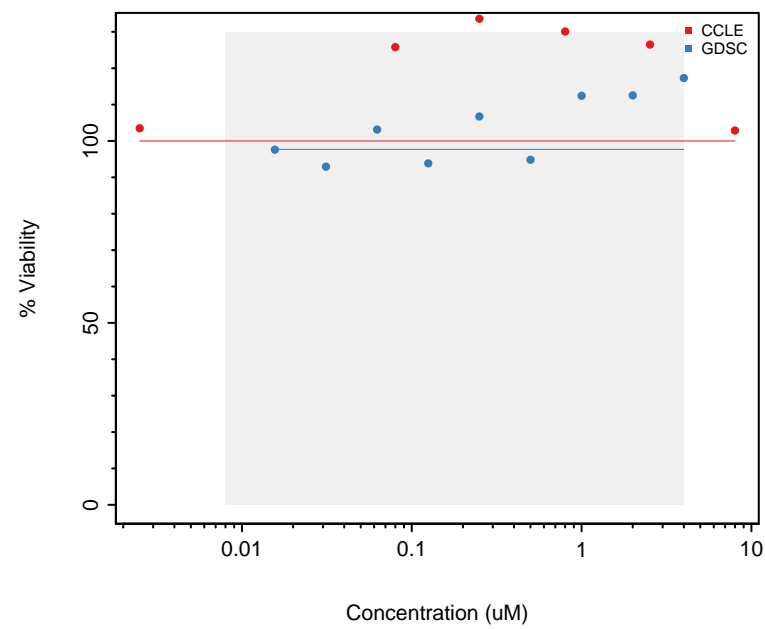

PD-0332991:OVCAR-4

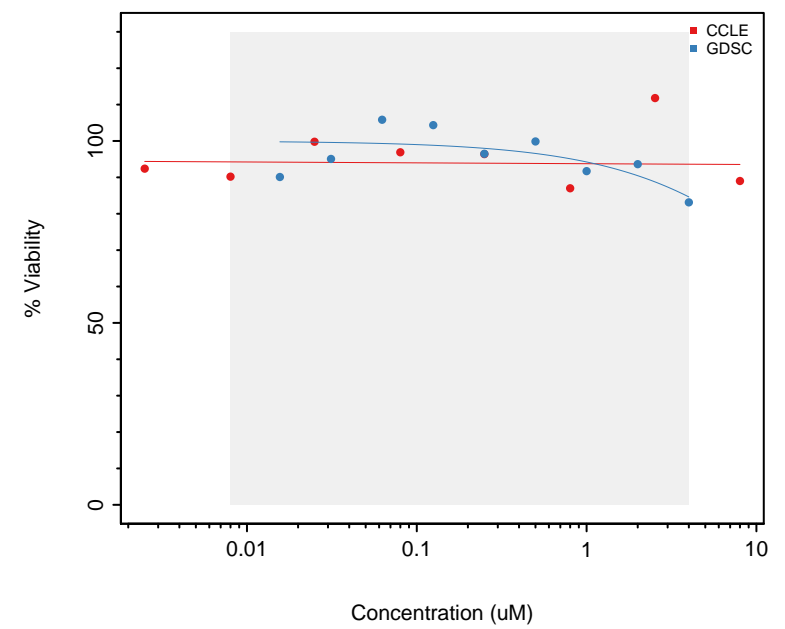

PD-0332991:OVCAR-8

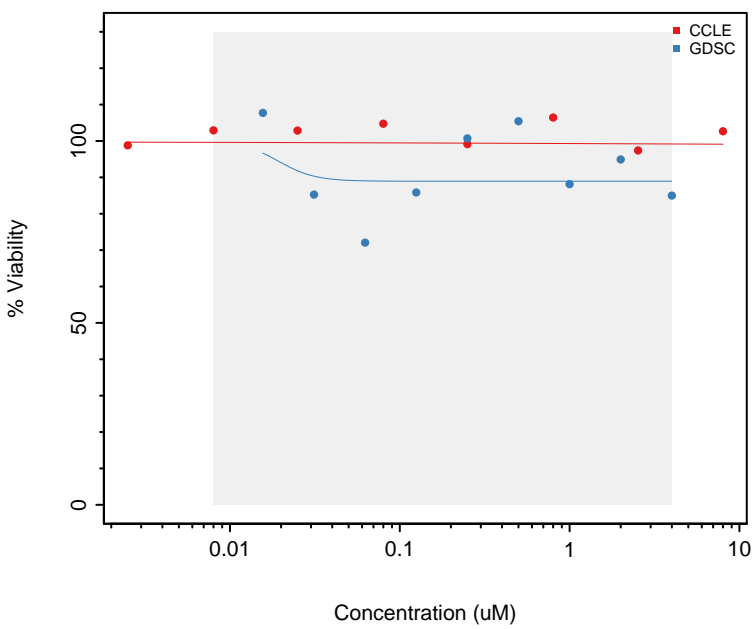

PD-0332991:P12-ICHIKAWA

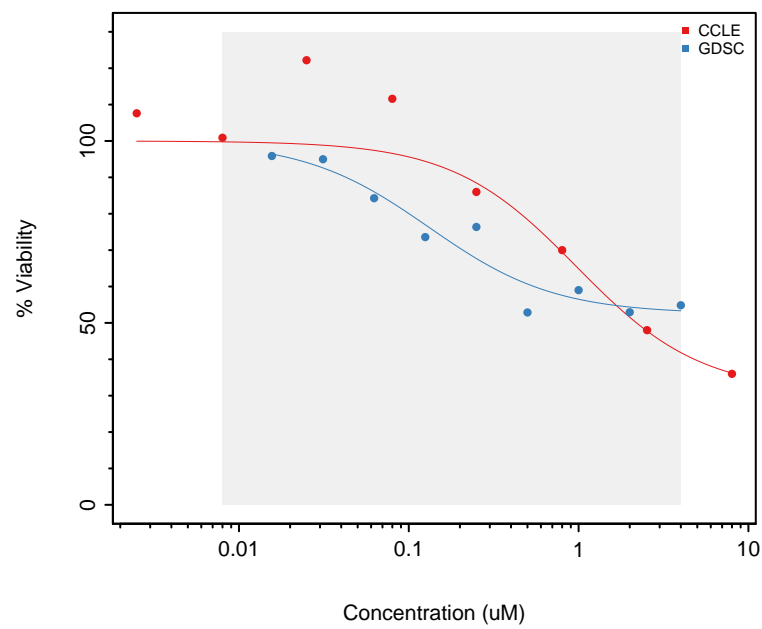

PD-0332991:P31-FUJ

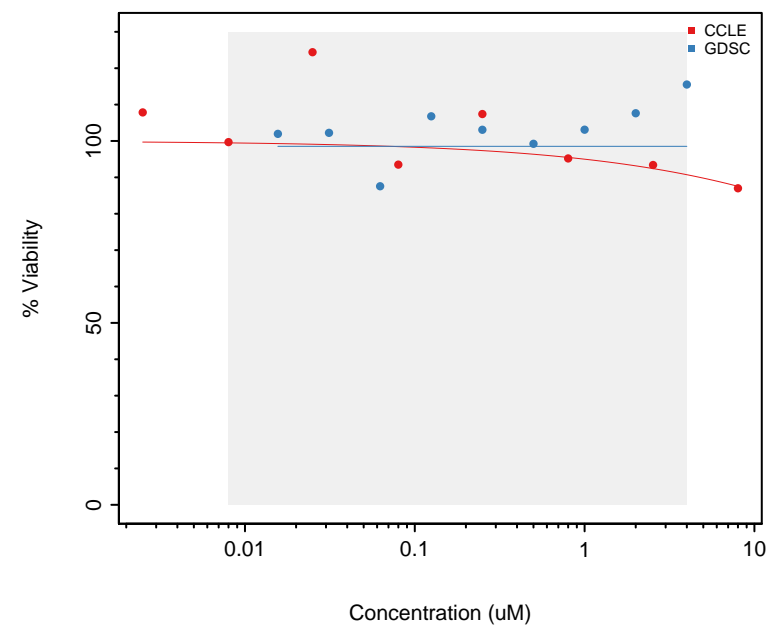

PD-0332991:Panc 03.27

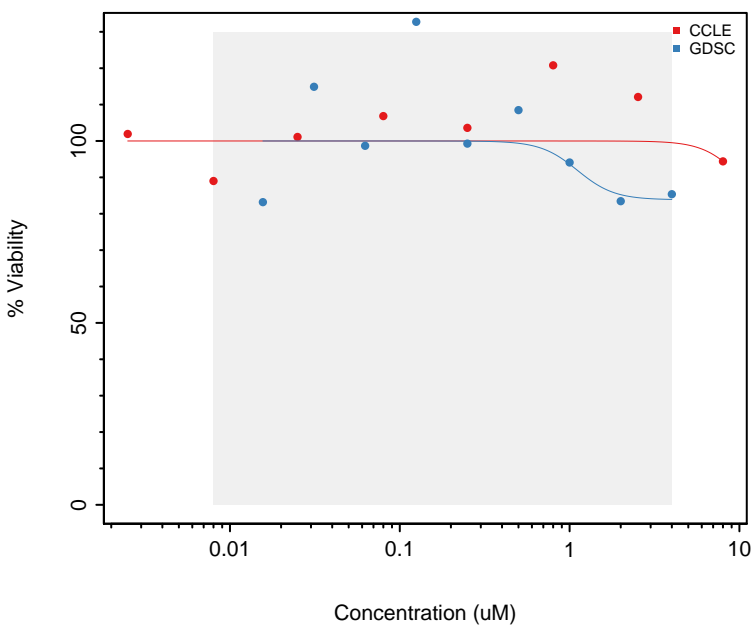

PD-0332991:Raji

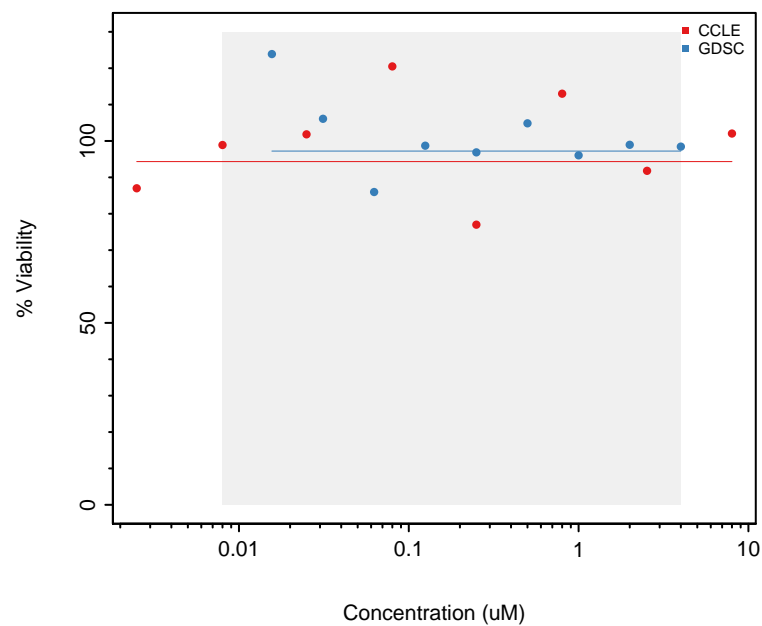

PD-0332991:RD

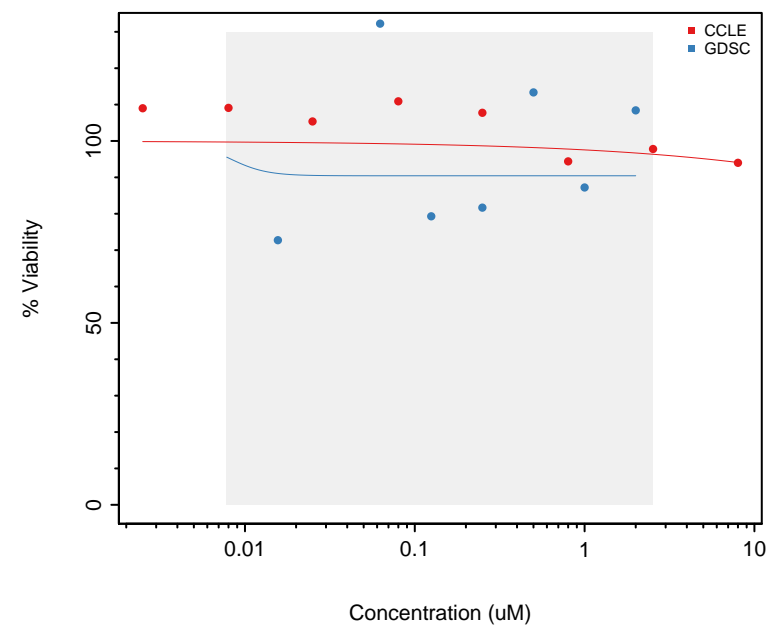

PD-0332991:REH

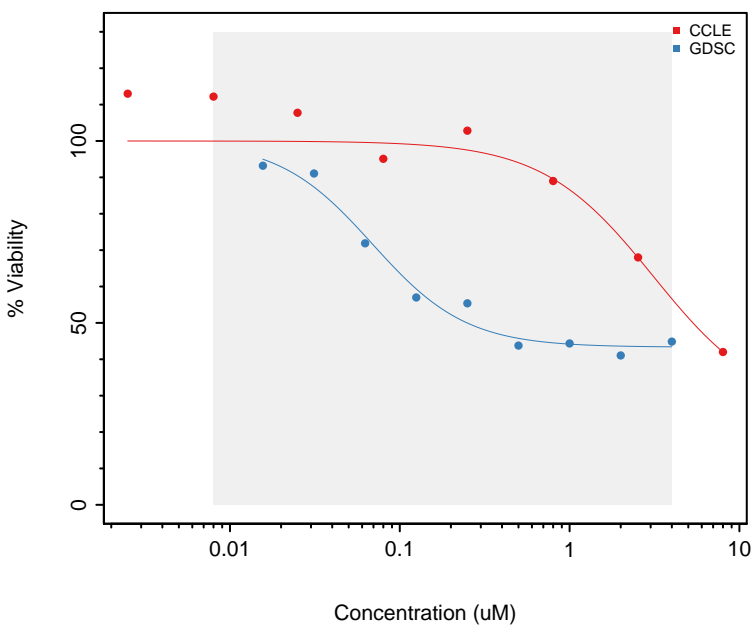

PD-0332991:RERF-LC-MS

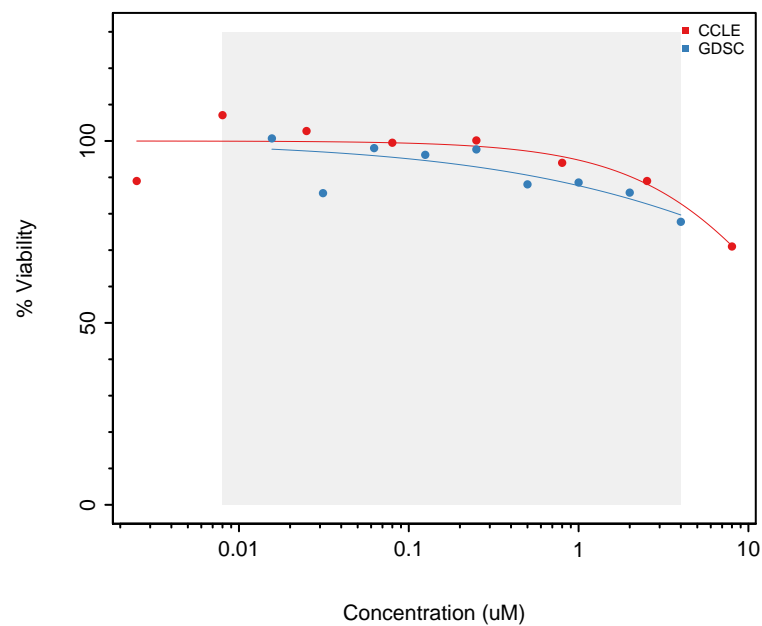

PD-0332991:RKO

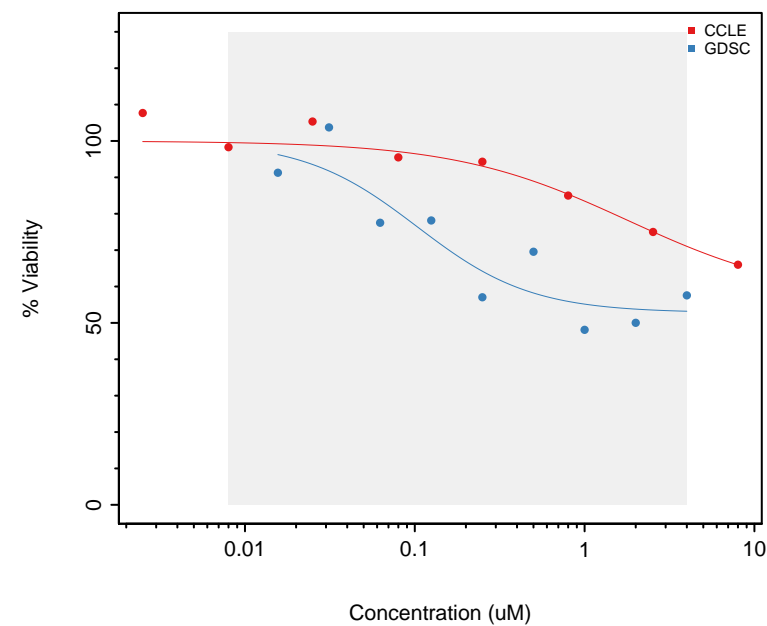

PD-0332991:RL95-2

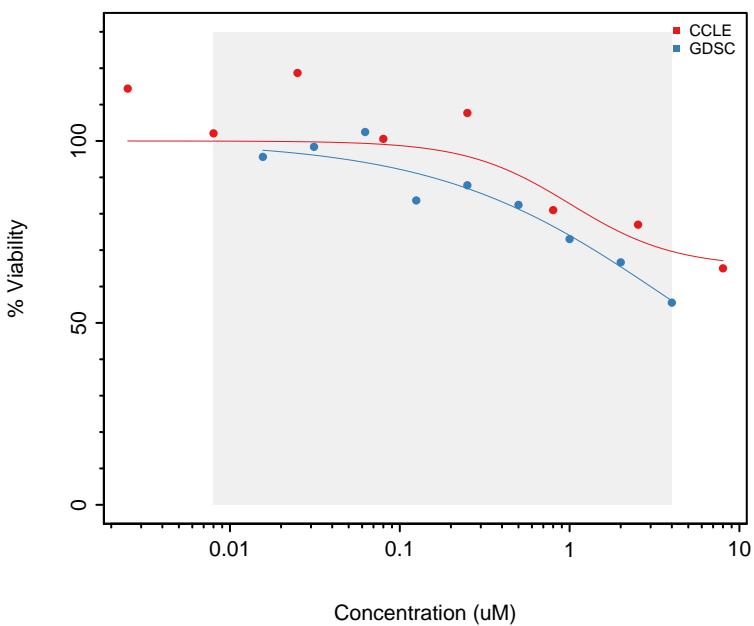

PD-0332991:RPMI-8402

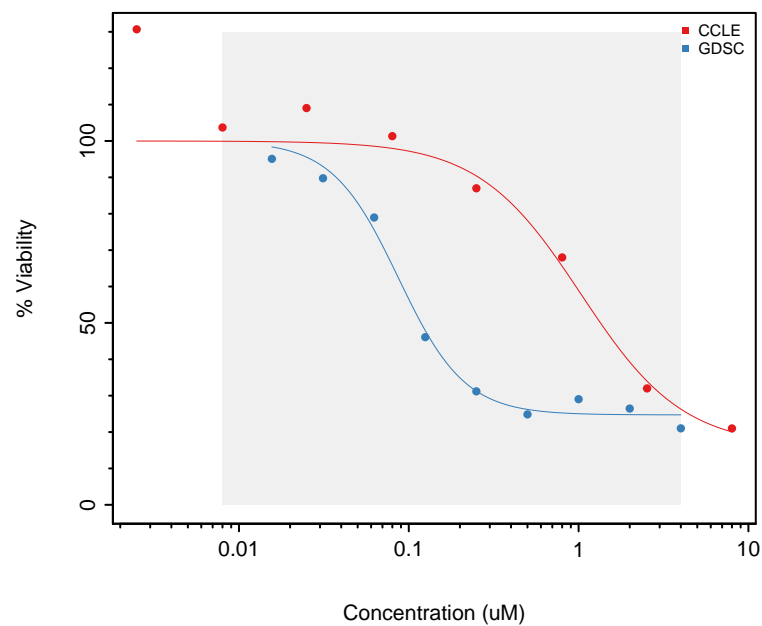

PD-0332991:RT-112

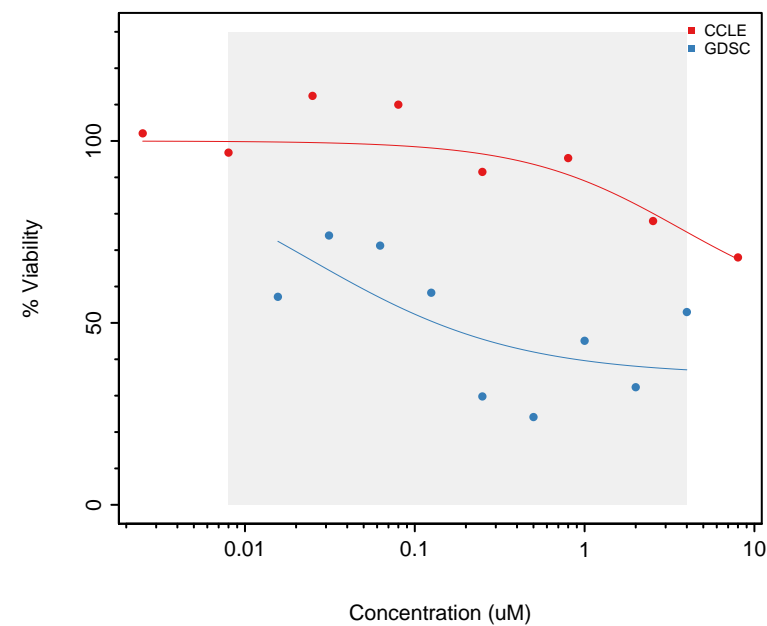

PD-0332991:RT4

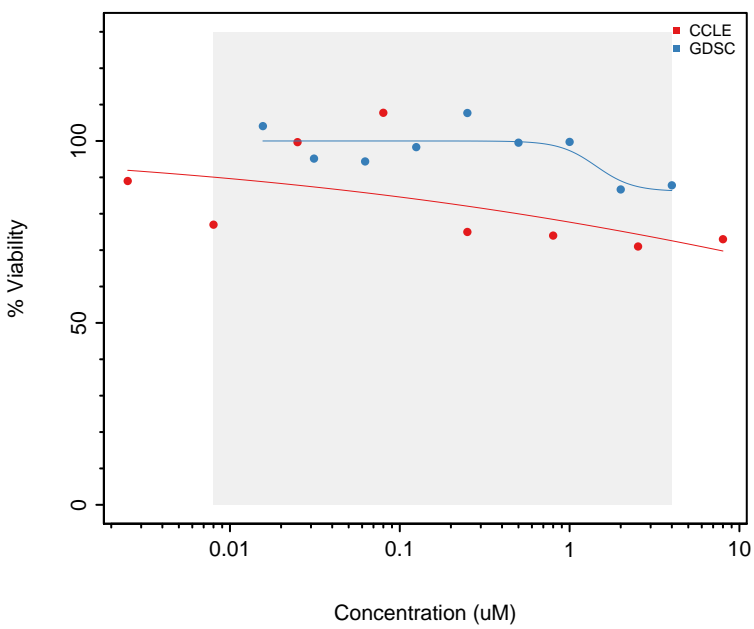

PD-0332991:RVH-421

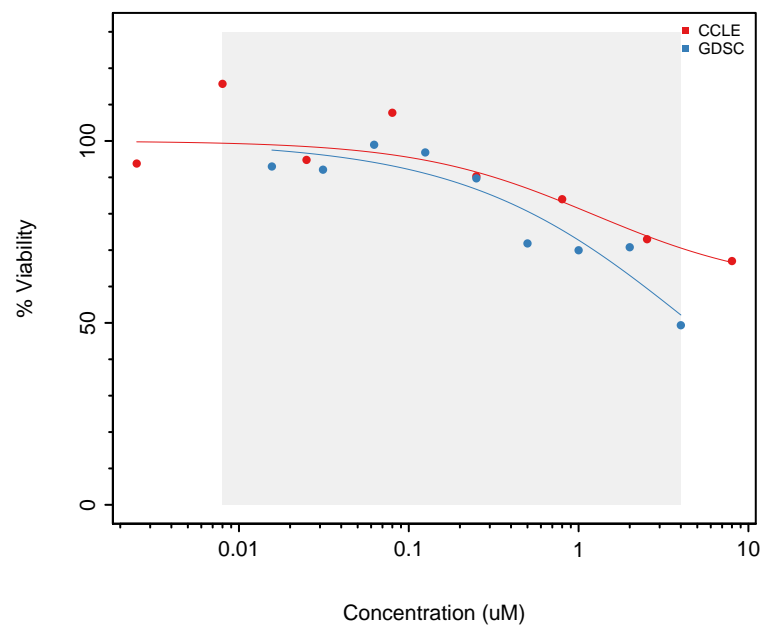

PD-0332991:Saos-2

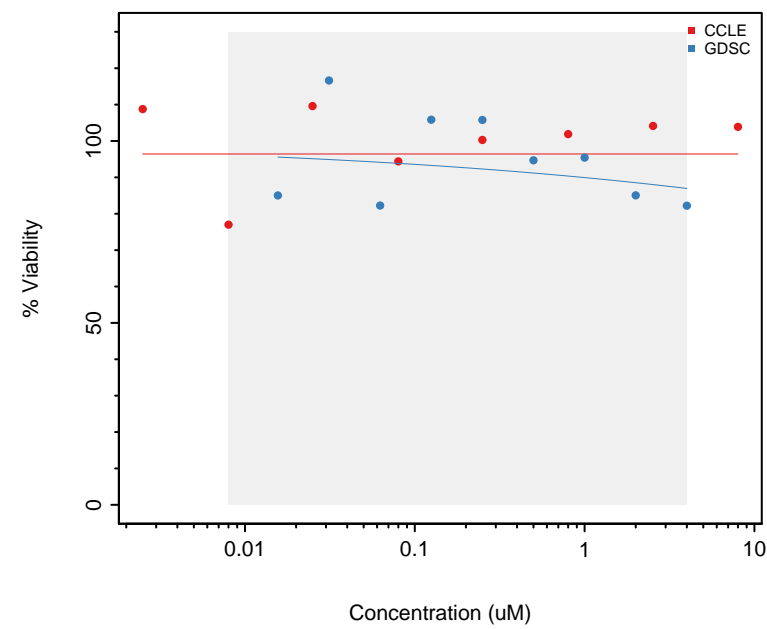

PD-0332991:SBC-5

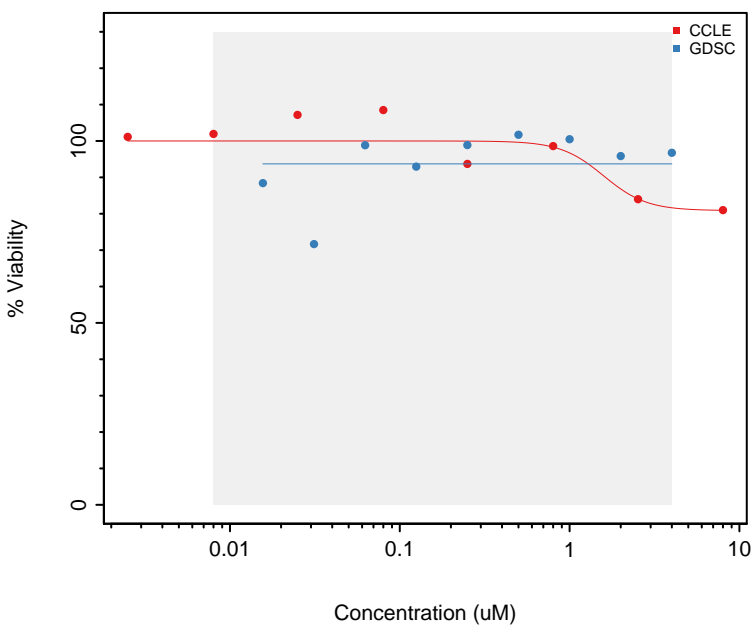

PD-0332991:SCC-25

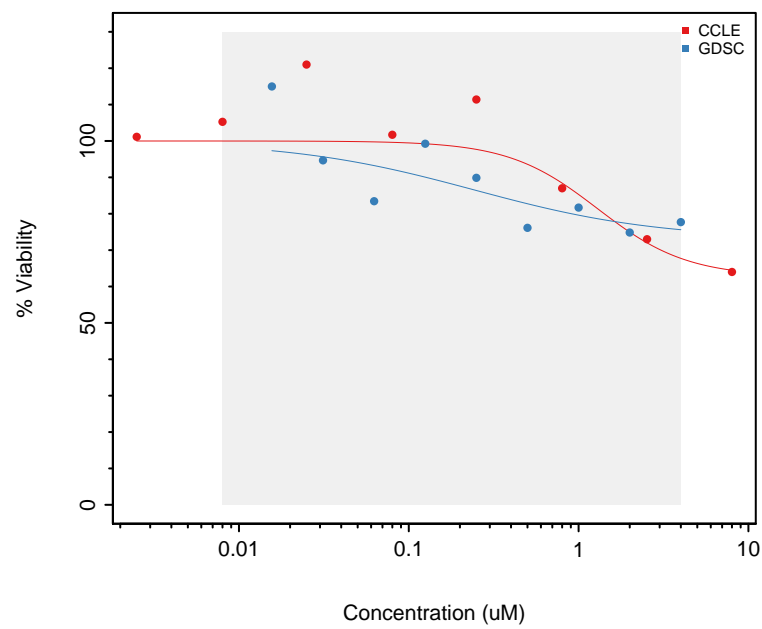

PD-0332991:SF126

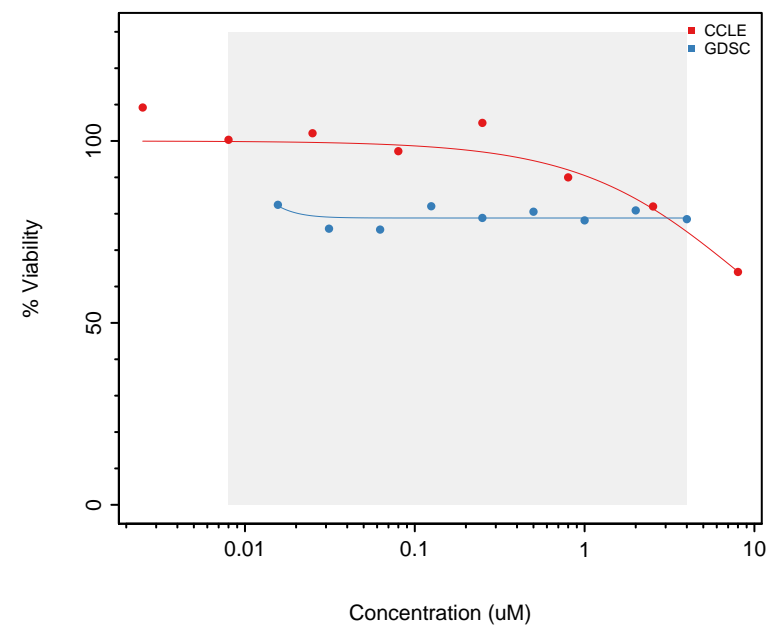

PD-0332991:SF295

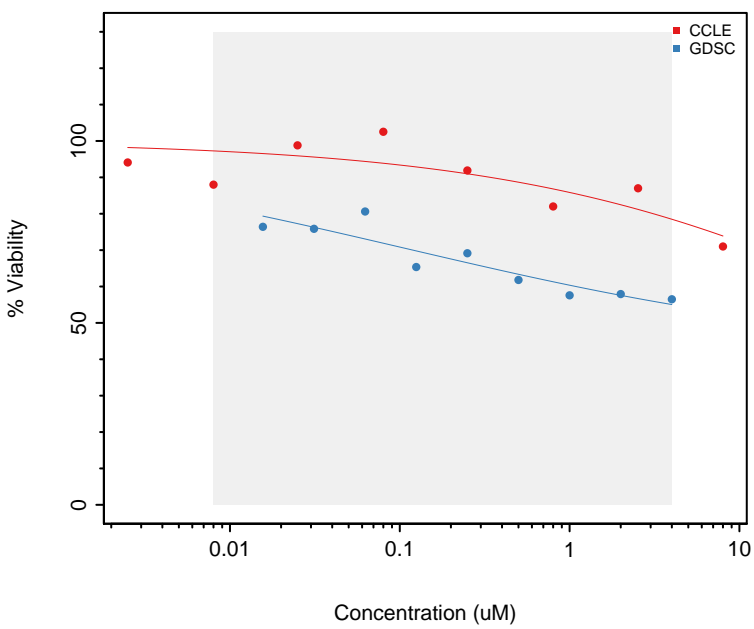

PD-0332991:SHP-77

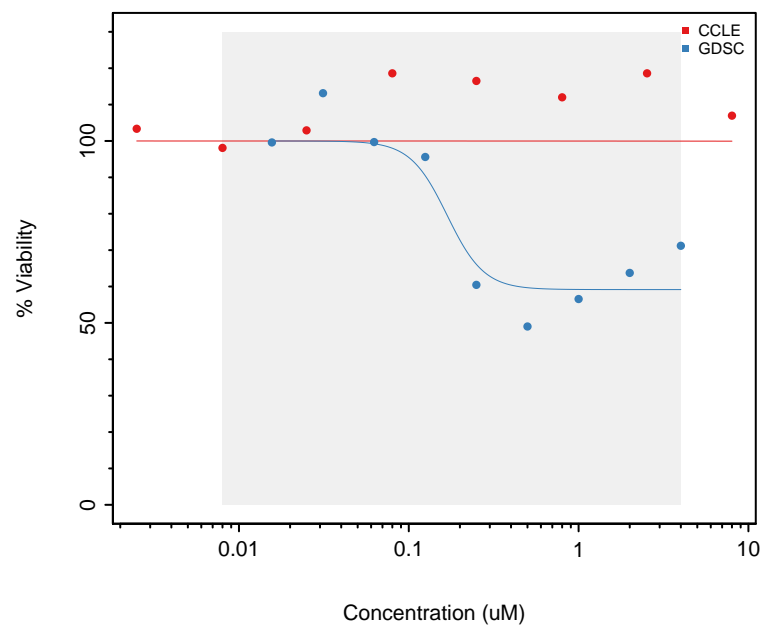

PD-0332991:SIMA

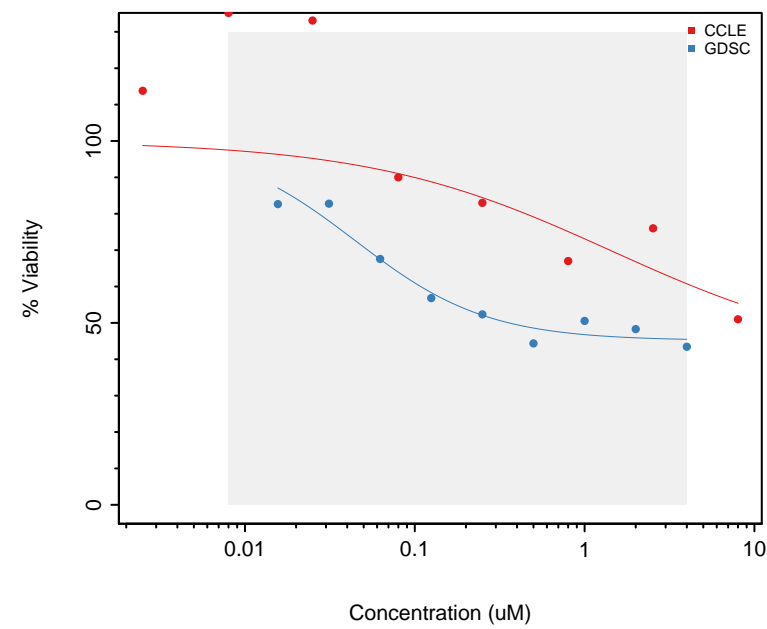

PD-0332991:SJRH30

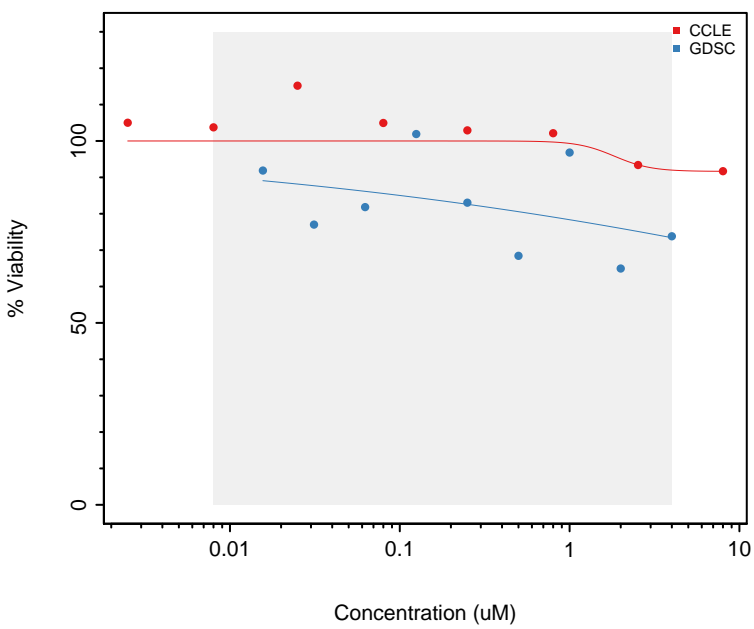

PD-0332991:SJSA-1

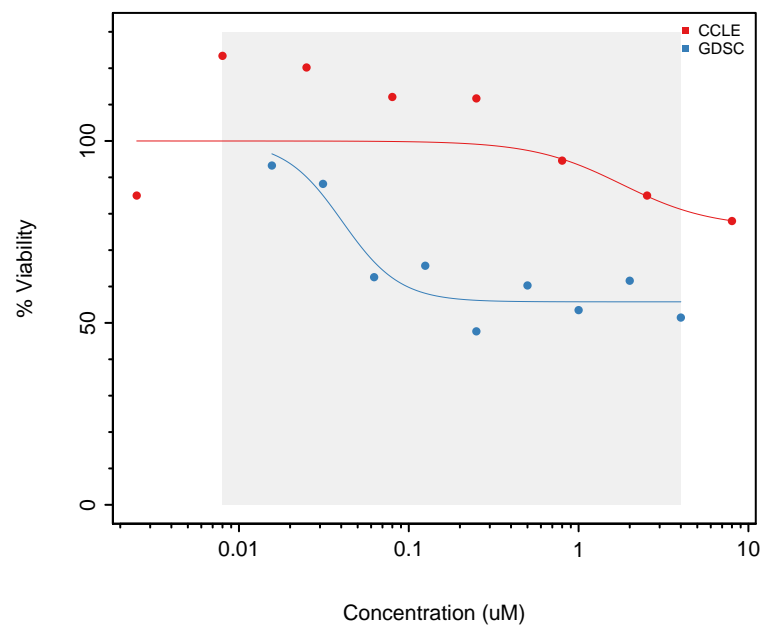

PD-0332991:SK-HEP-1

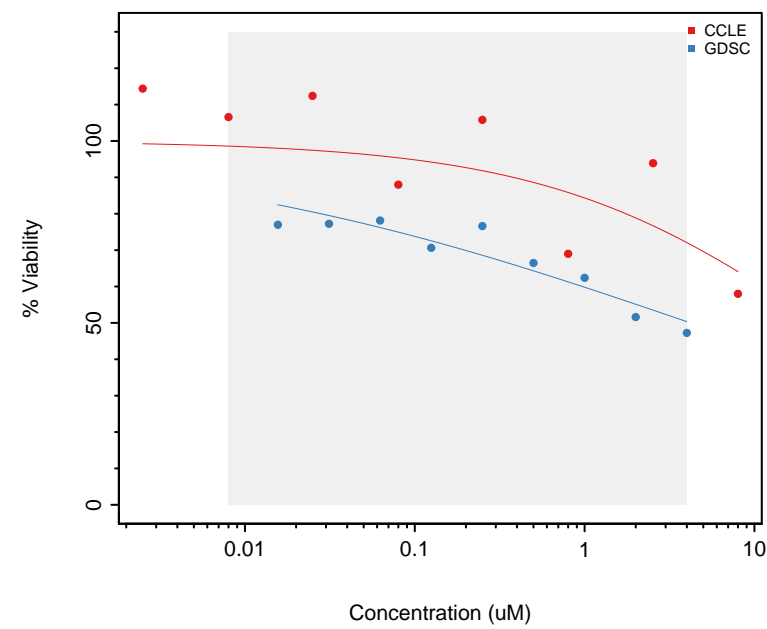

PD-0332991:SK-LU-1

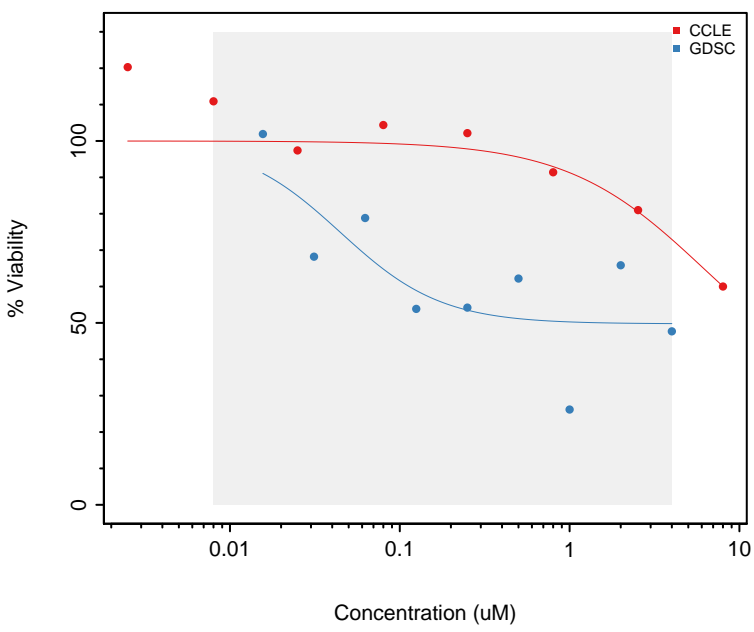

PD-0332991:SK-MEL-2

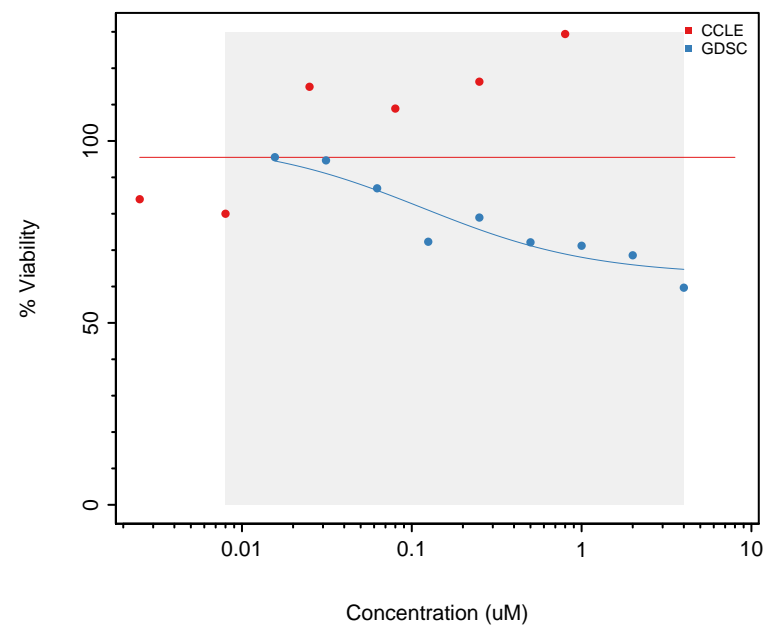

PD-0332991:SK-MEL-30

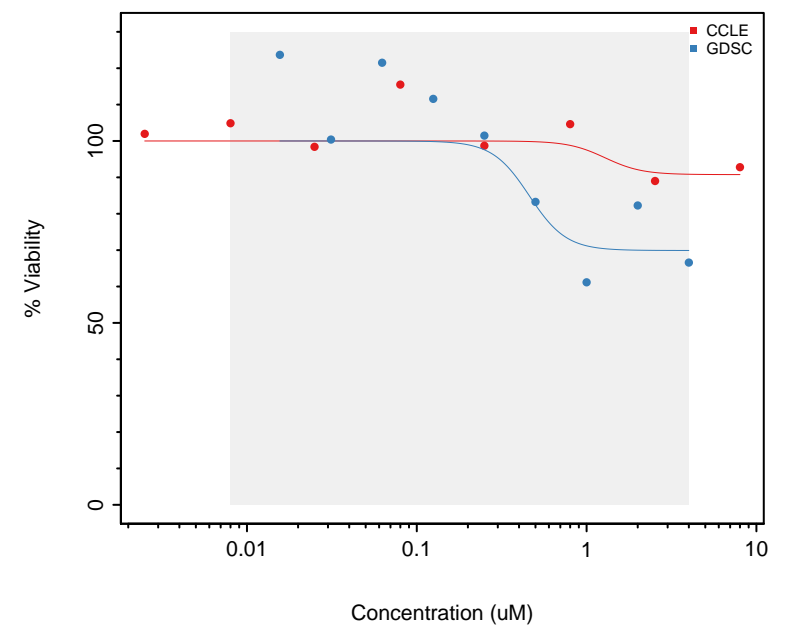

PD-0332991:SK-MEL-5

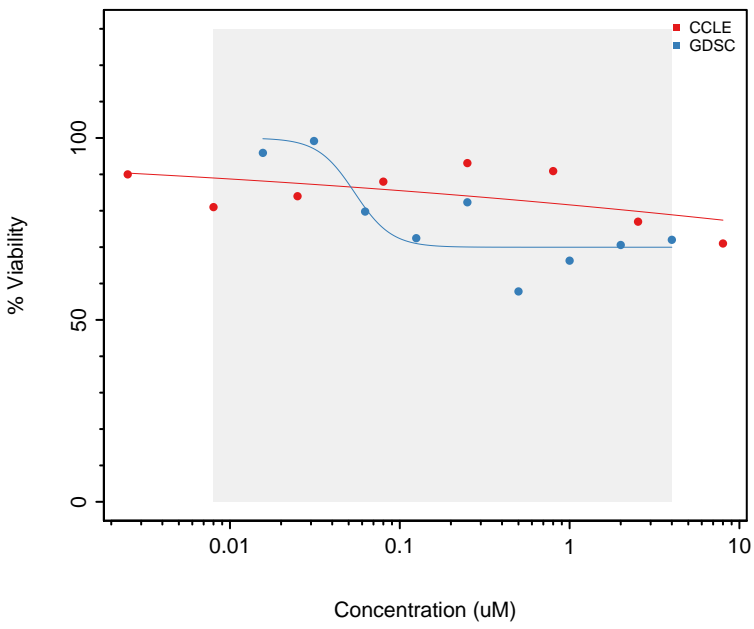

PD-0332991:SK-MM-2

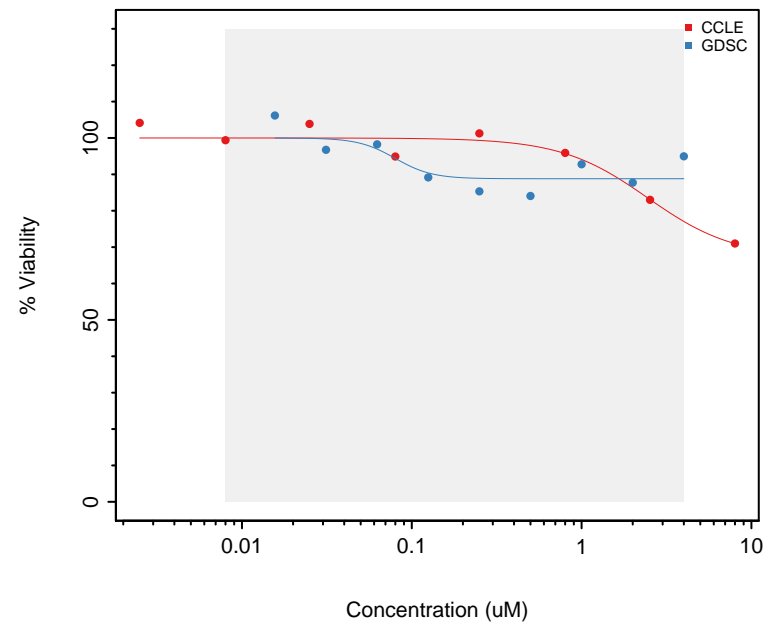

PD-0332991:SK-N-AS

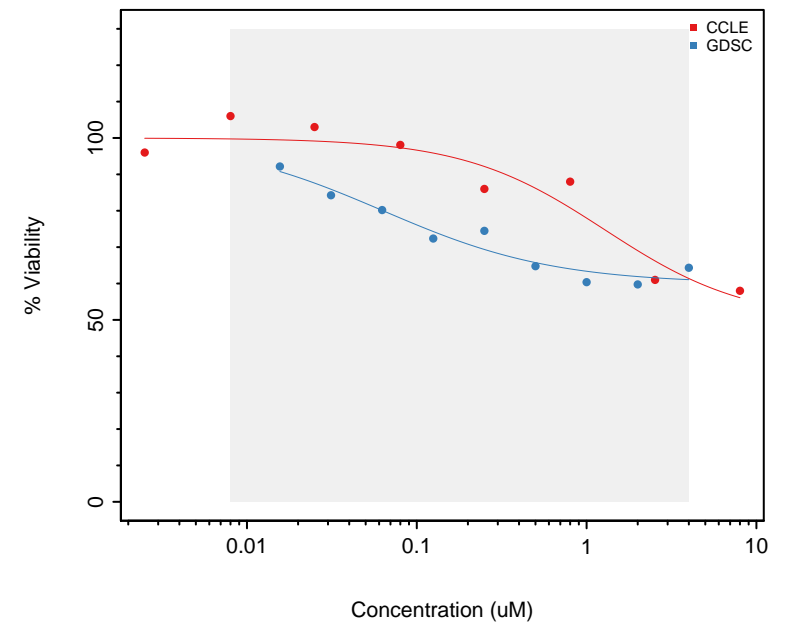

PD-0332991:SK-OV-3

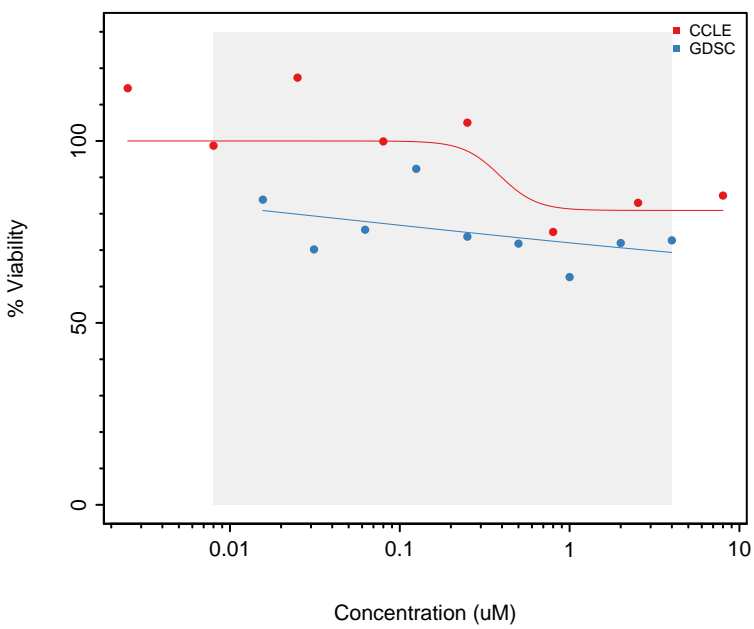

PD-0332991:SNG-M

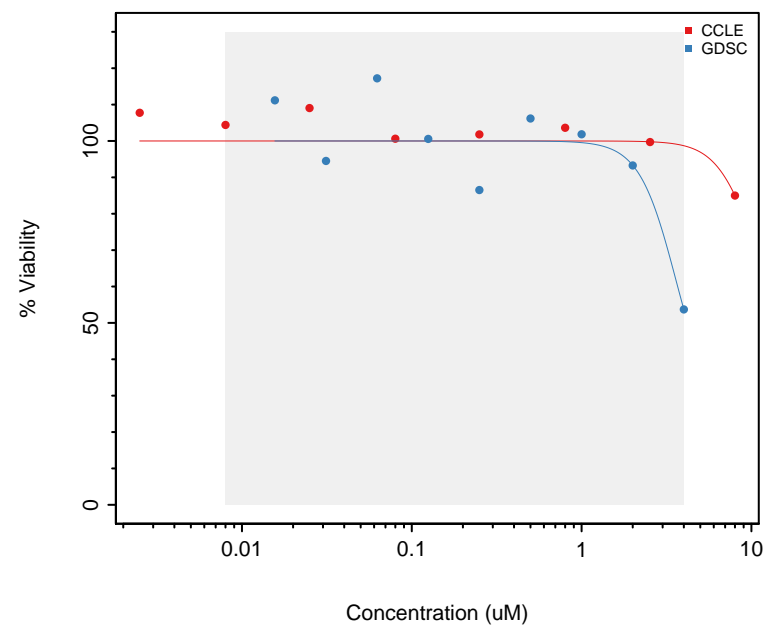

PD-0332991:NCI-SNU-1

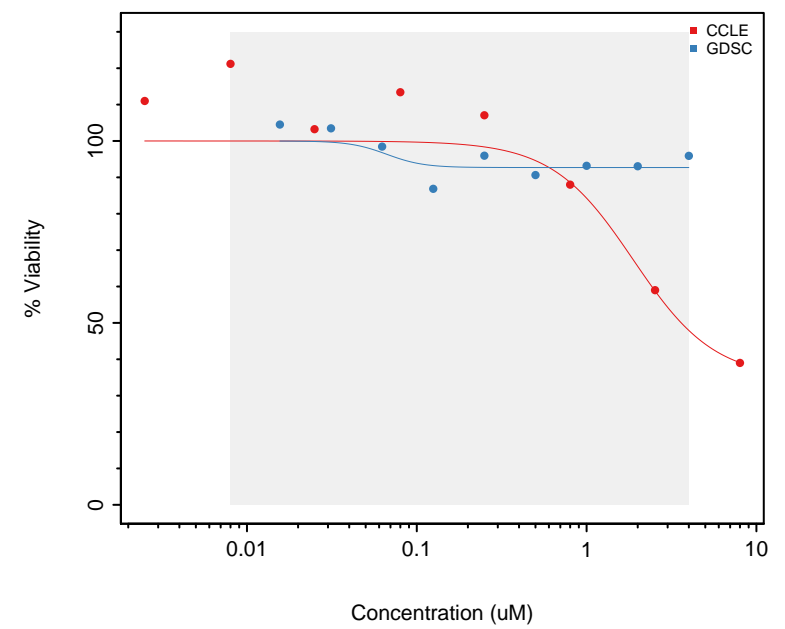

PD-0332991:NCI-SNU-16

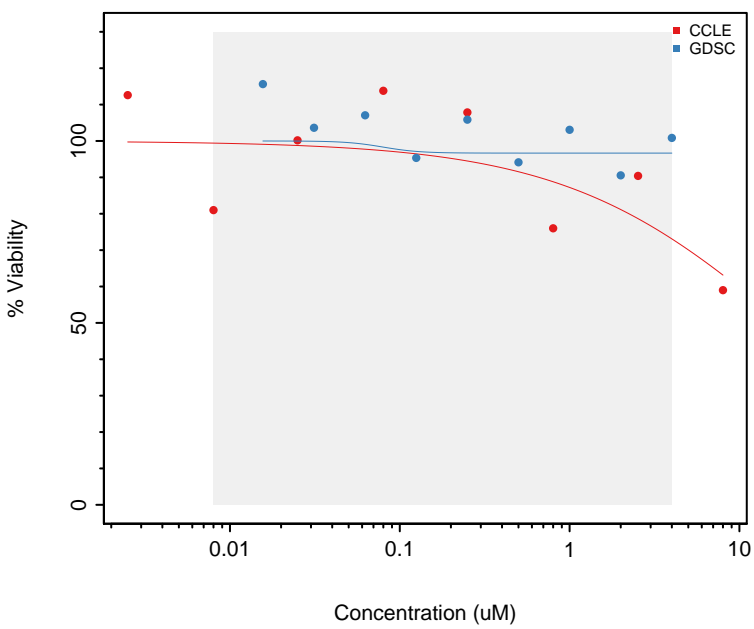

PD-0332991:SNU-423

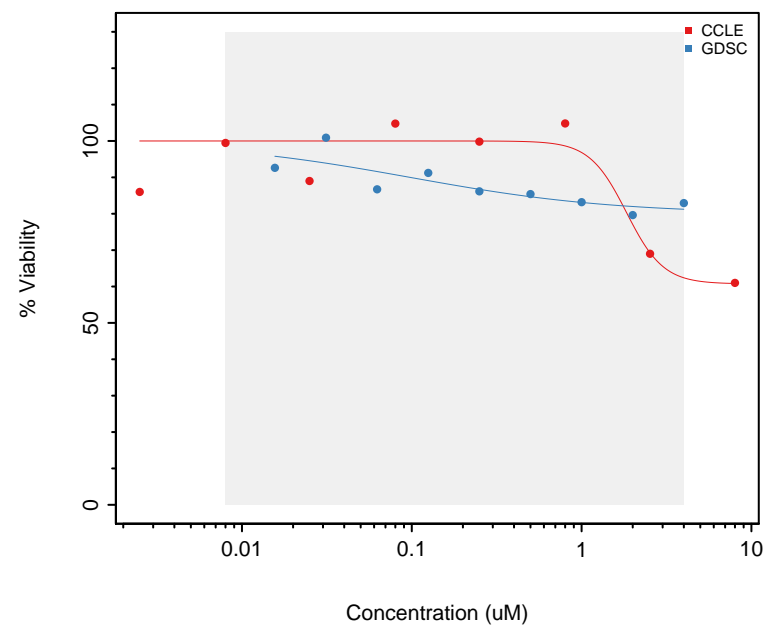

PD-0332991:SNU-449

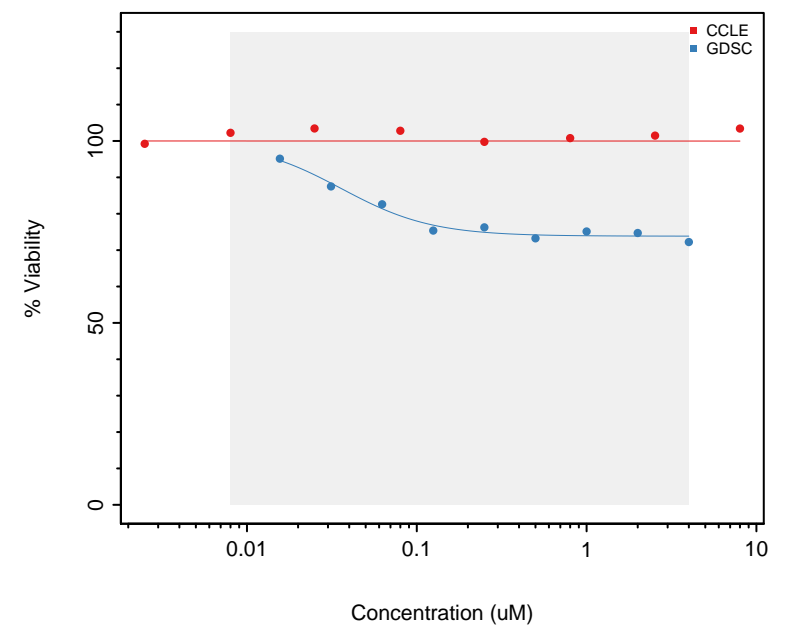





PD-0332991:TCCSUP

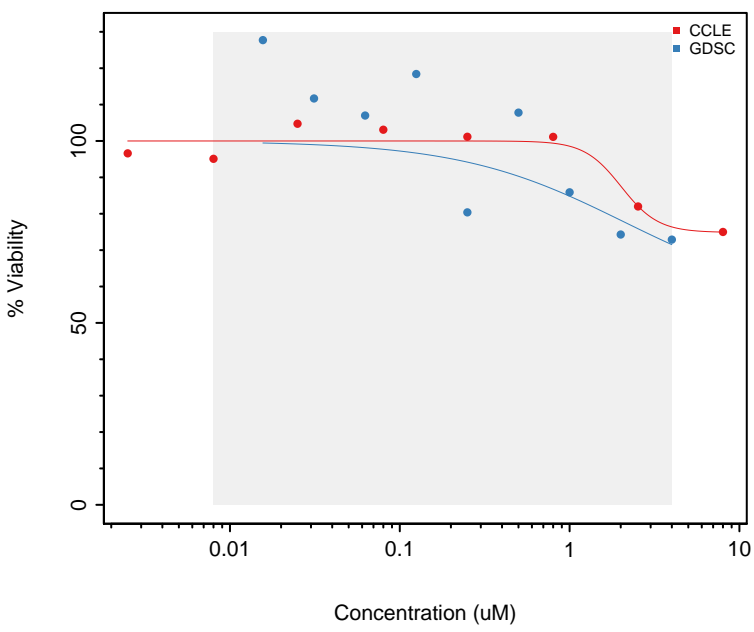

PD-0332991:TE-9

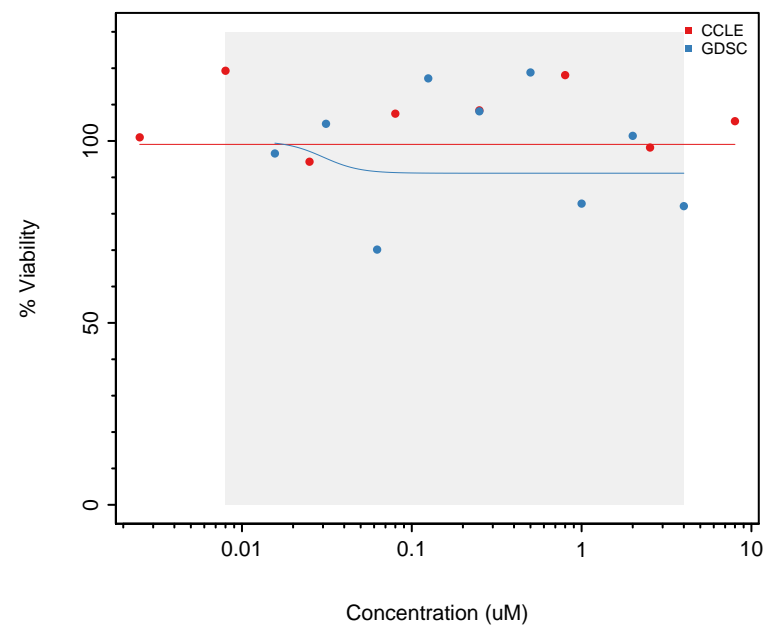

PD-0332991:TYK-nu

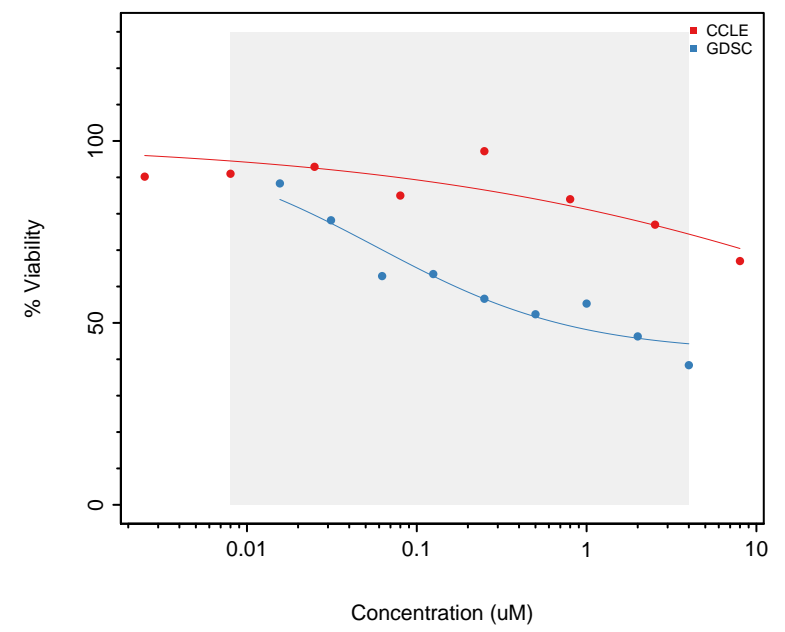

PD-0332991:U-118-MG

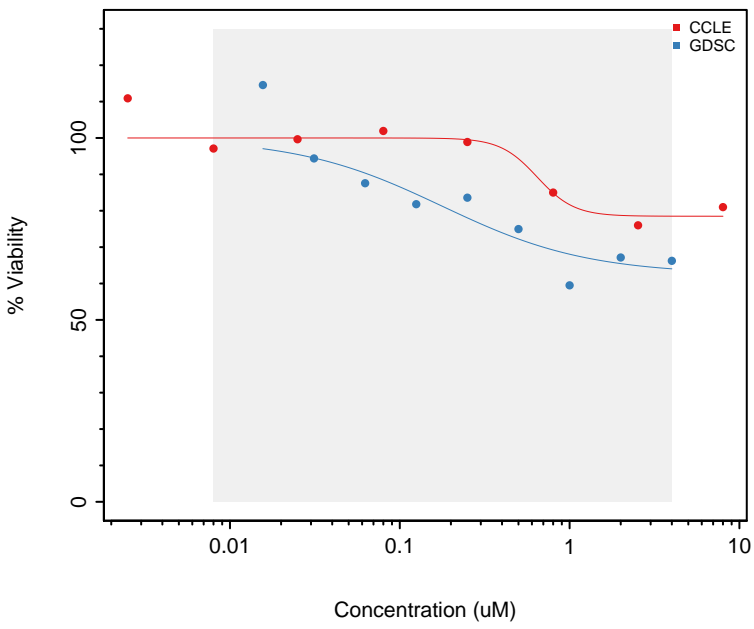

PD-0332991:U-2-OS

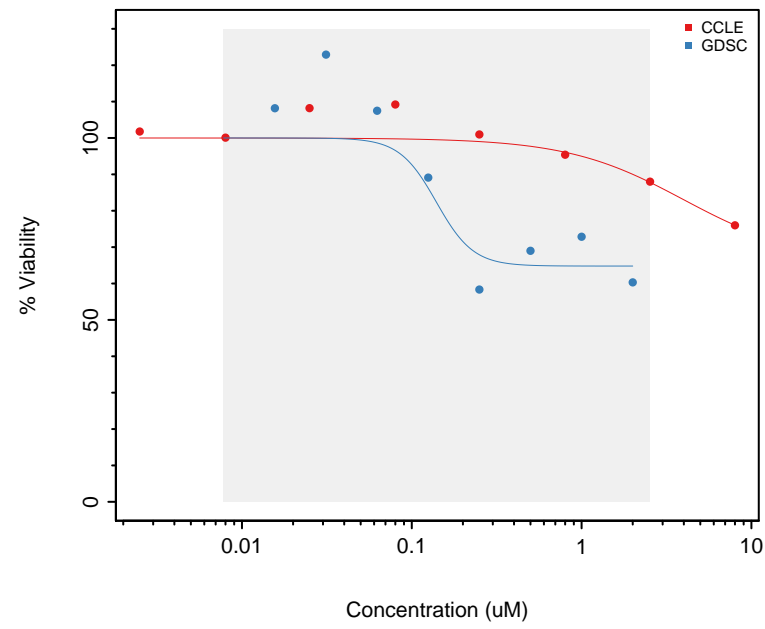

PD-0332991:U-87-MG

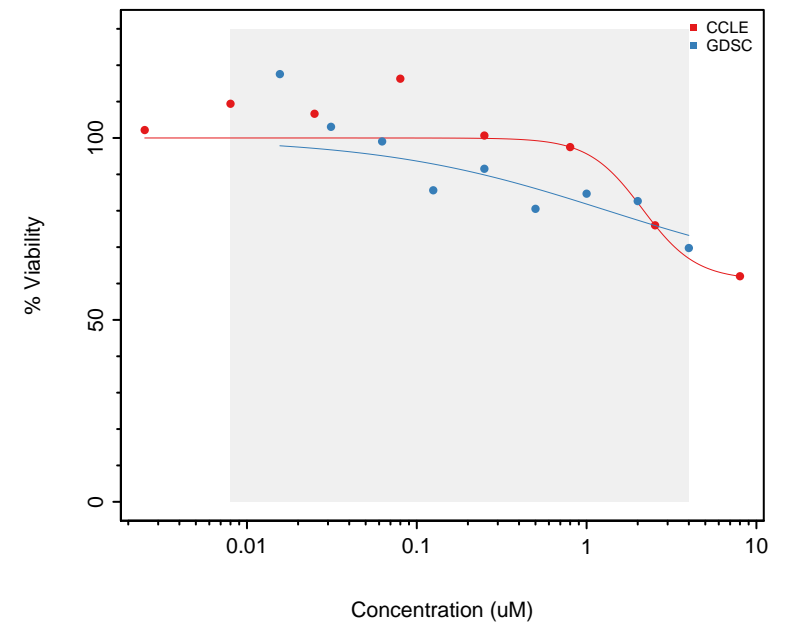

PD-0332991:VMRC-RCZ

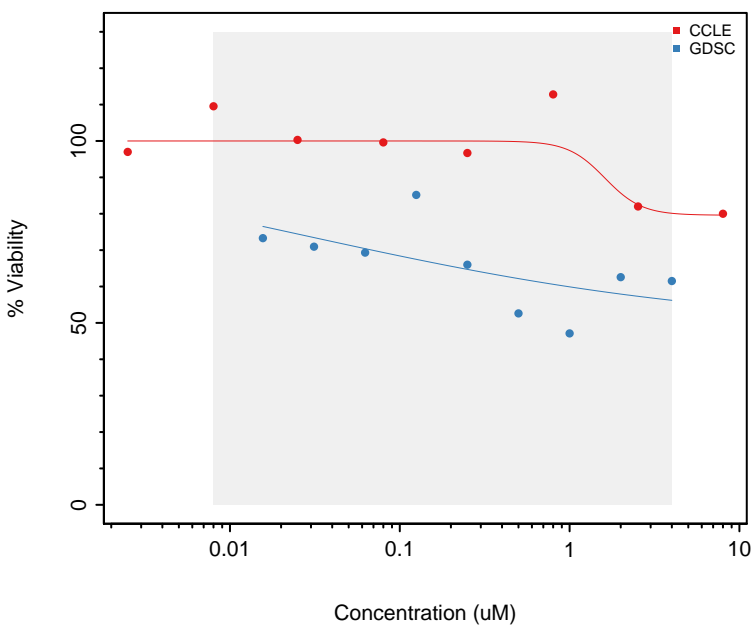

PD-0332991:YKG-1

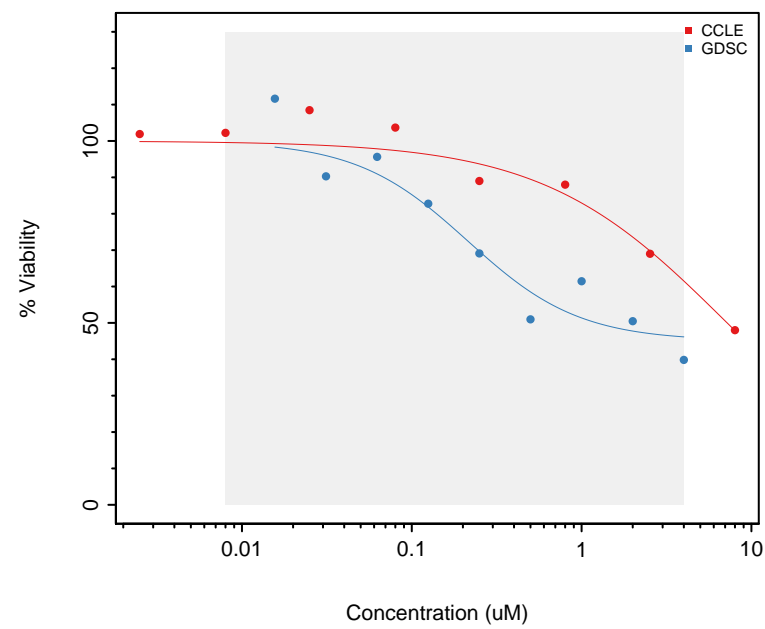

PD-0332991:ZR-75-30

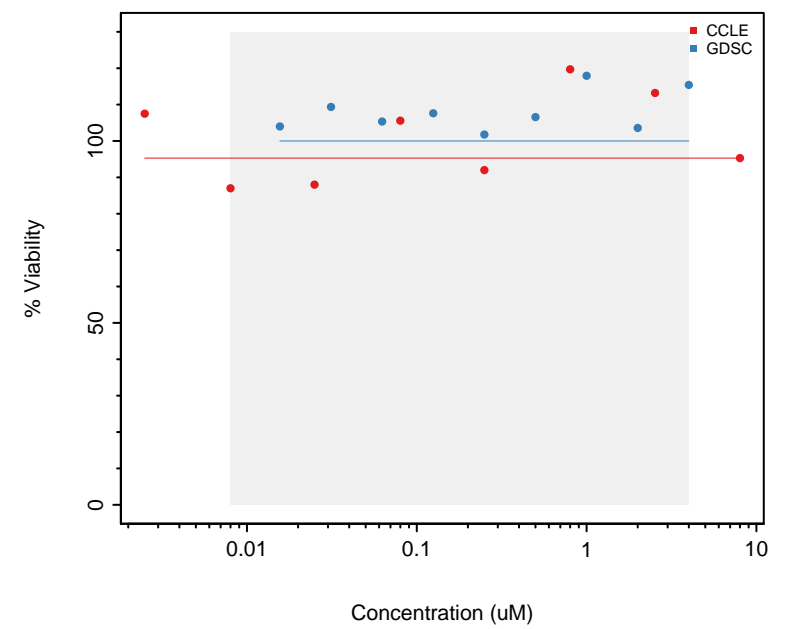

paclitaxel:697

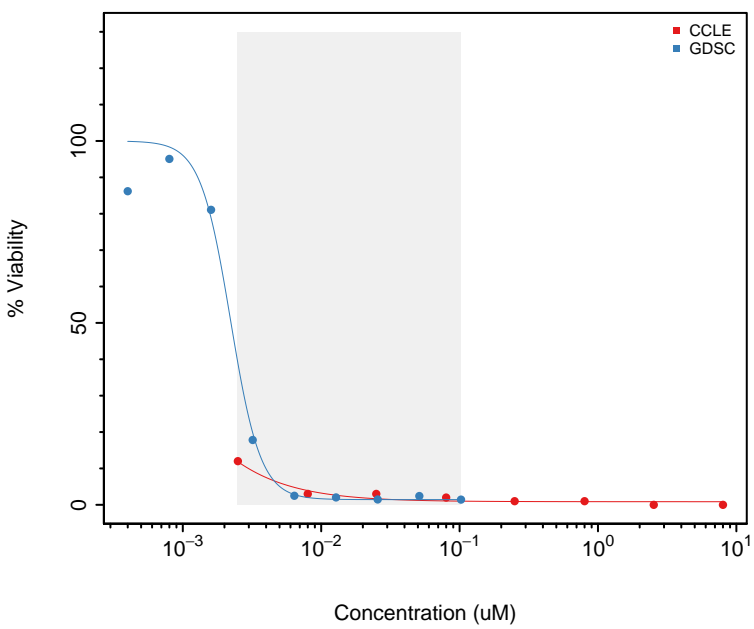

paclitaxel:8-MG-BA

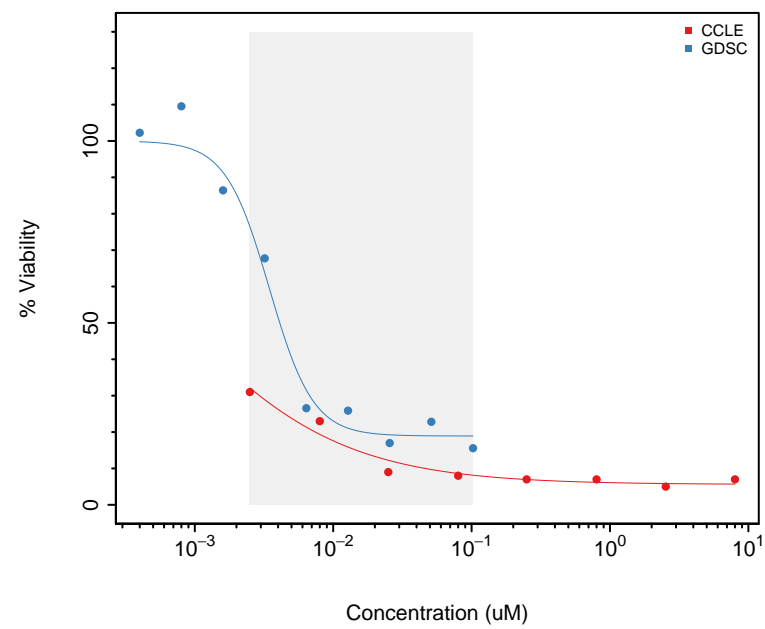

paclitaxel:A253

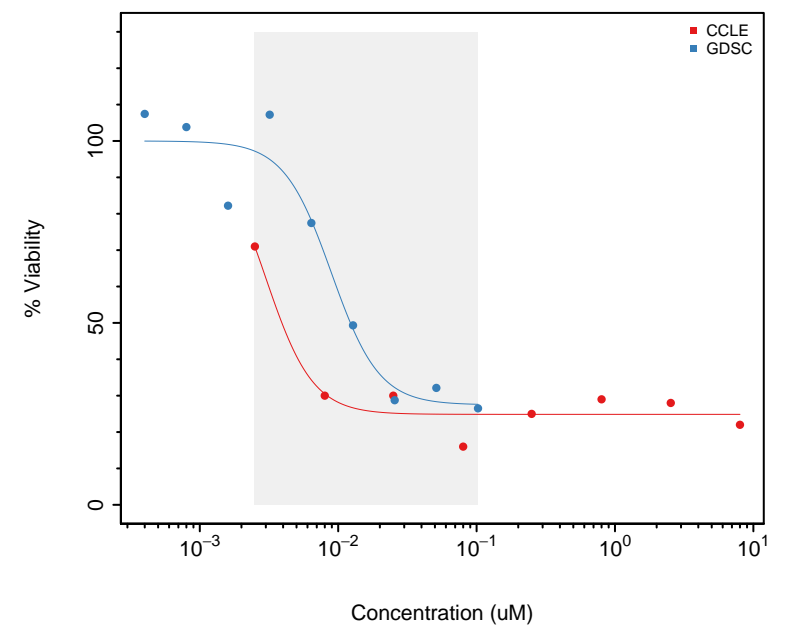

paclitaxel:BL-41

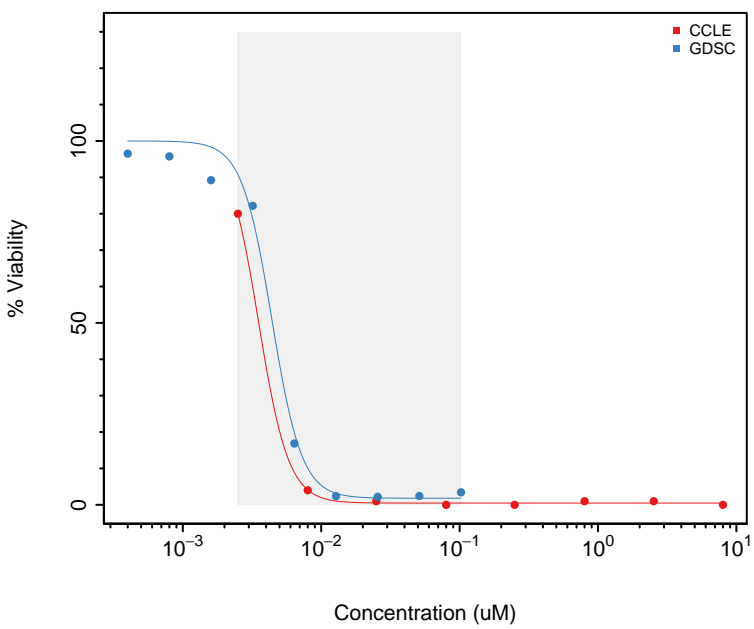

paclitaxel:BL-70

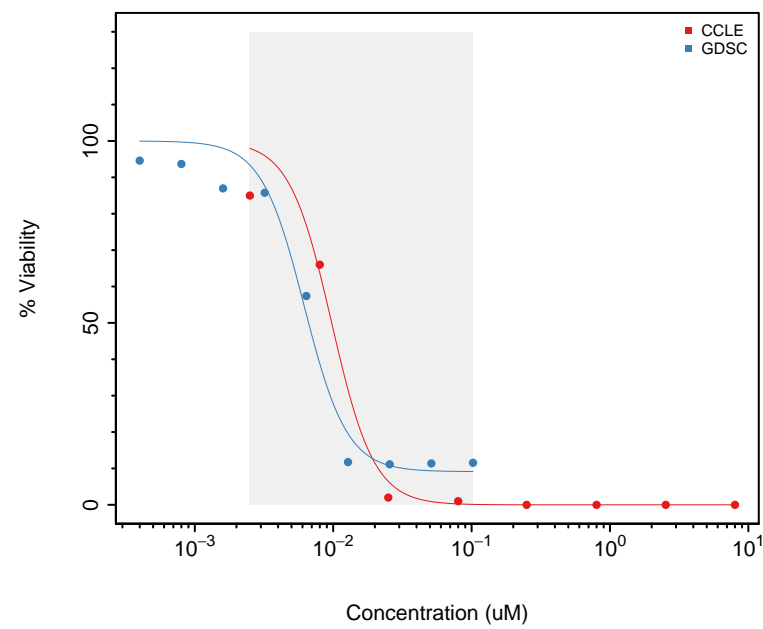

paclitaxel:BT-474

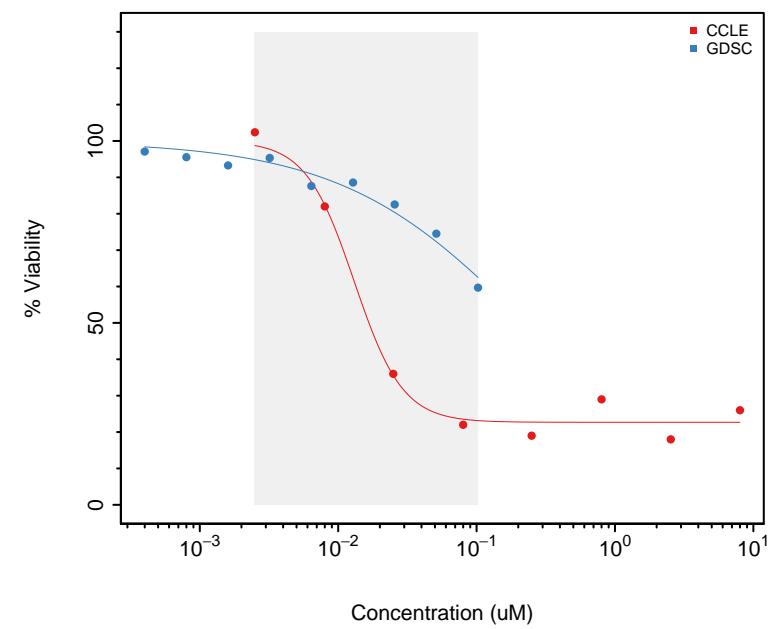

paclitaxel:C2BBe1

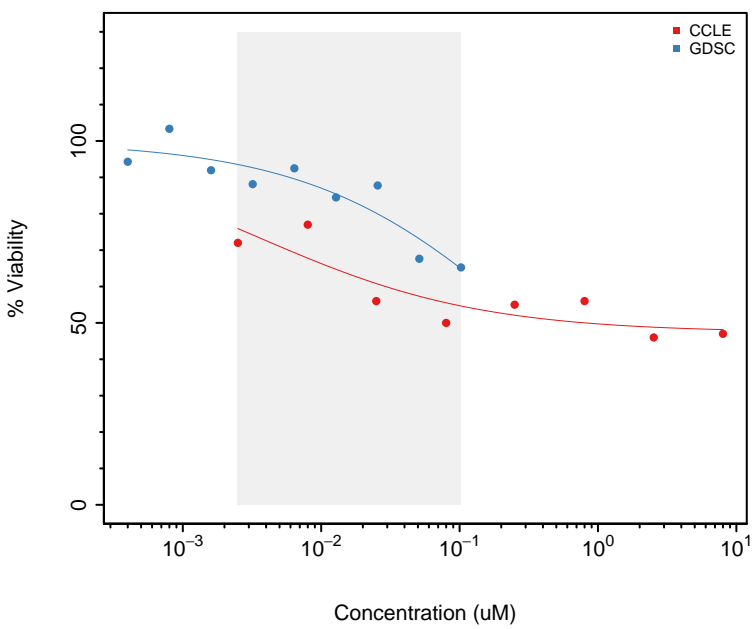

paclitaxel:Calu-6

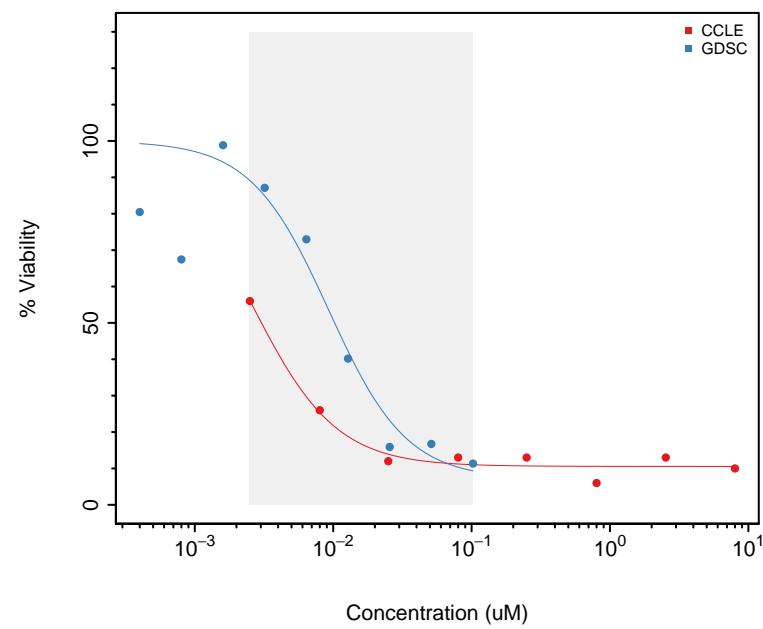

paclitaxel:CAS-1

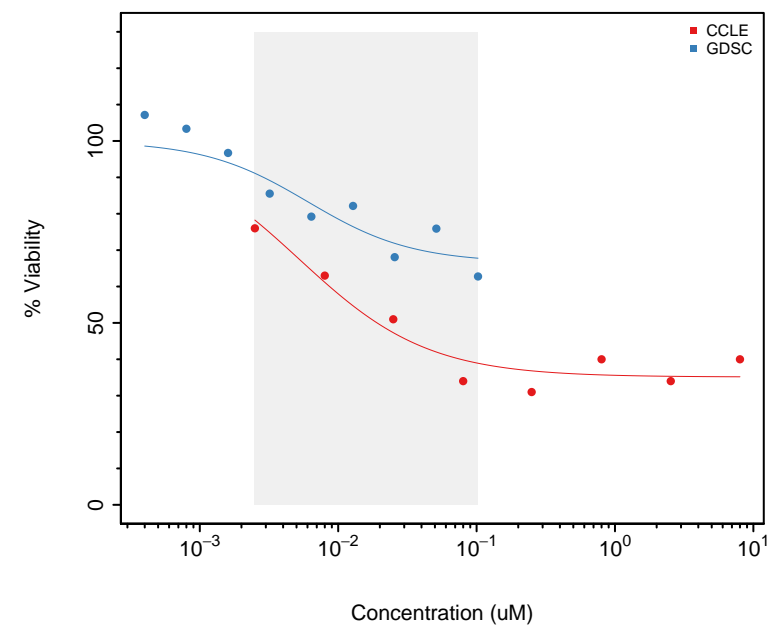

paclitaxel:COLO-320-HSR

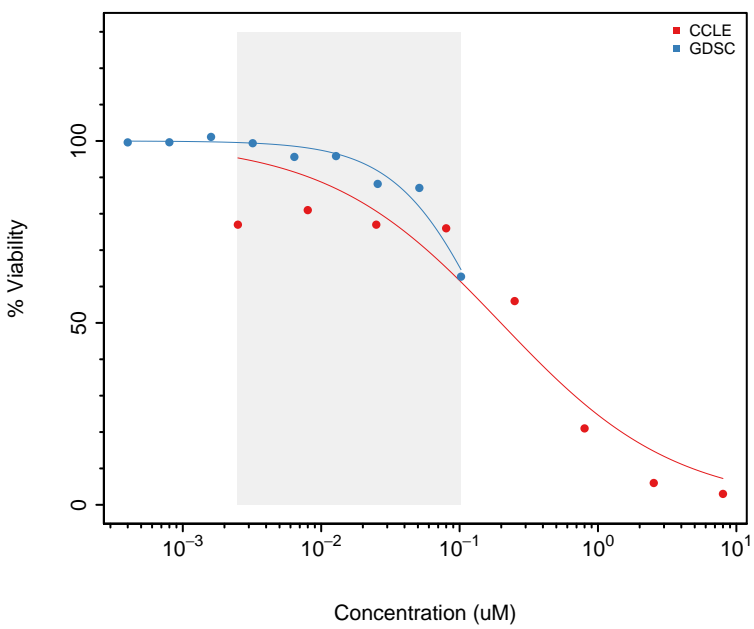

paclitaxel:DEL

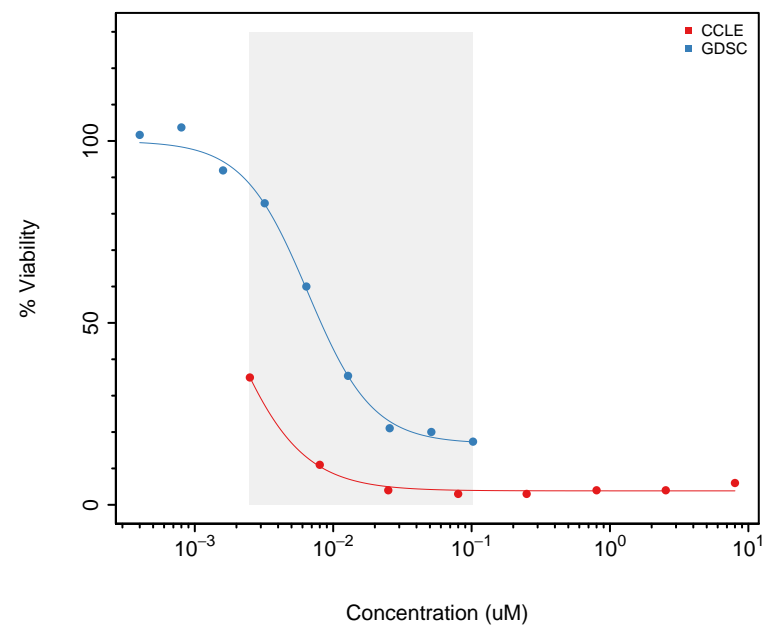

paclitaxel:DMS-114

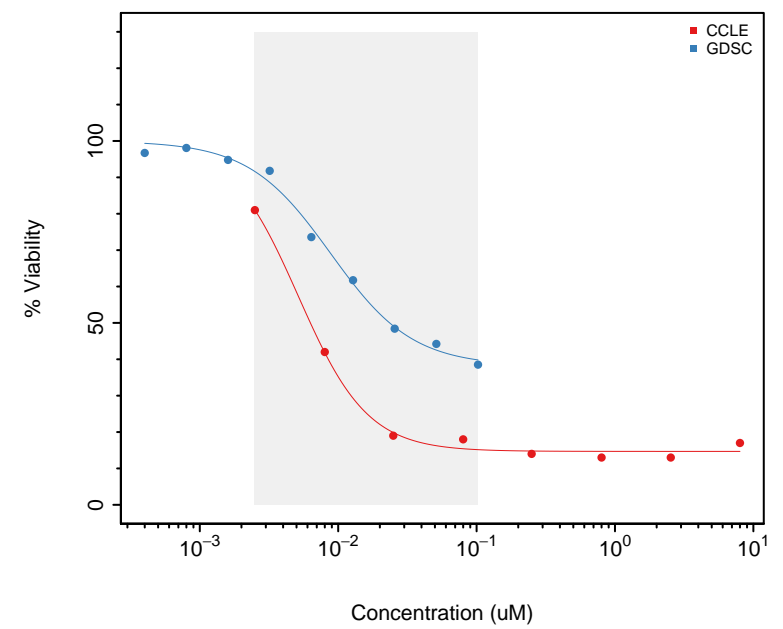

paclitaxel:DOHH-2

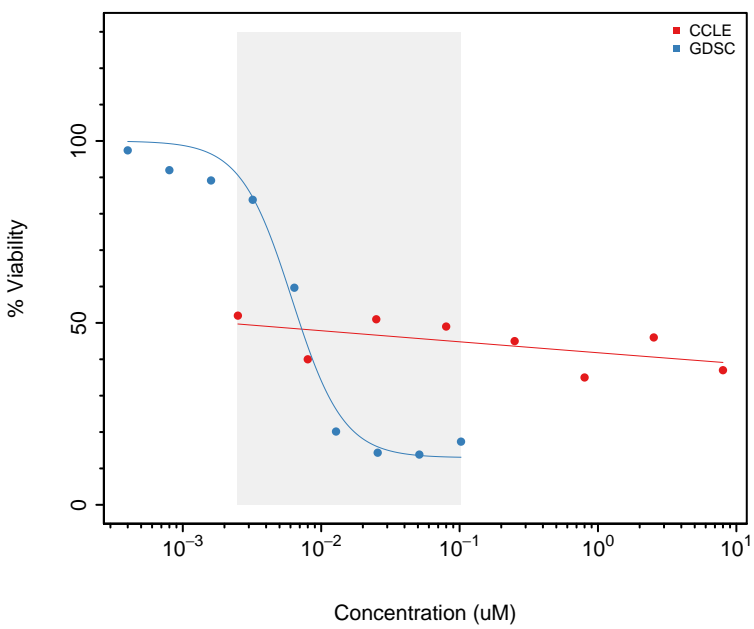

paclitaxel:EB2

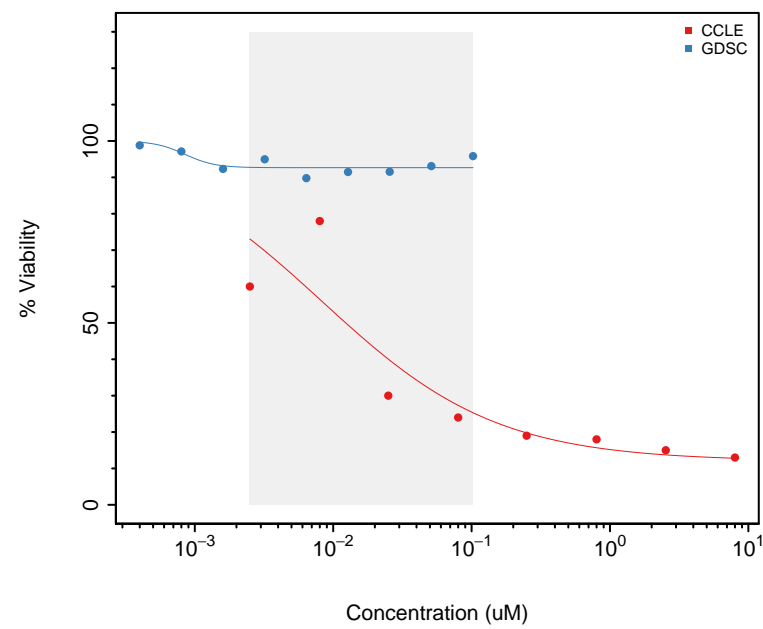

paclitaxel:EM-2

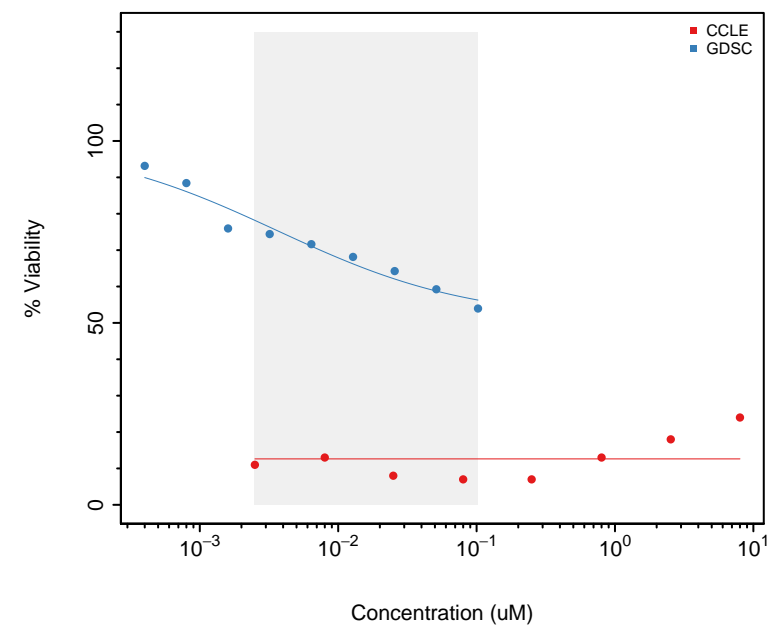

paclitaxel:GB-1

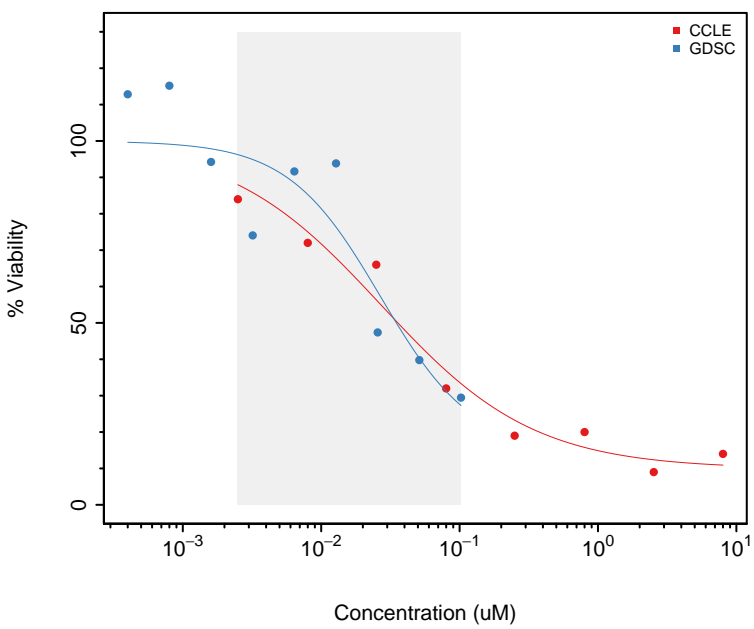

paclitaxel:GCIY

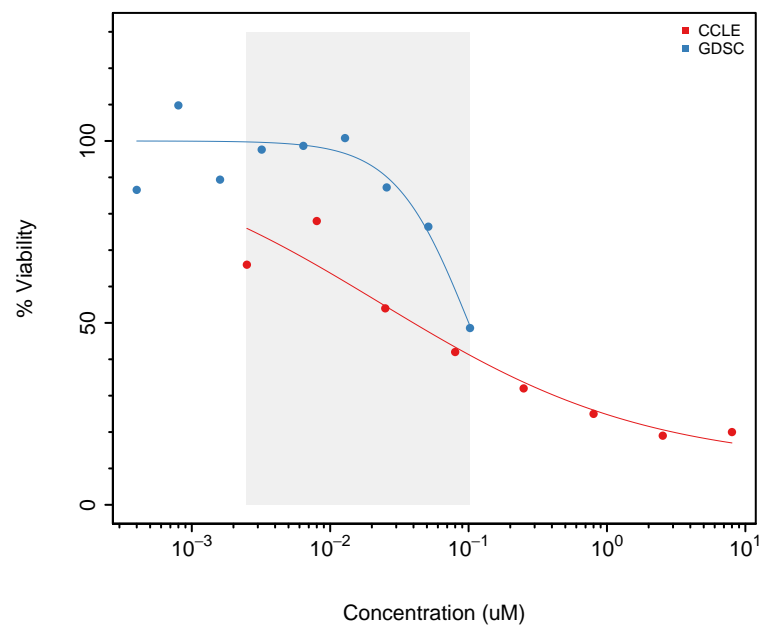

paclitaxel:HCC1187

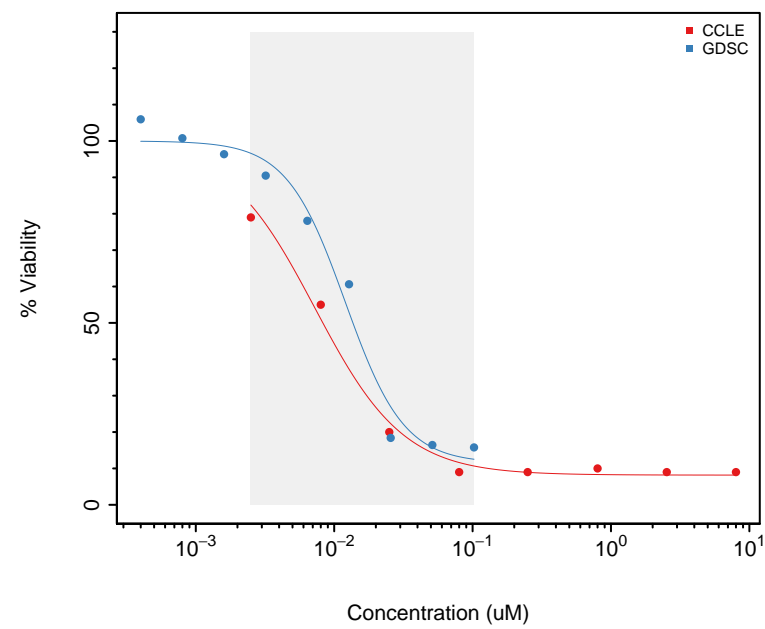

paclitaxel:HD-MY-Z

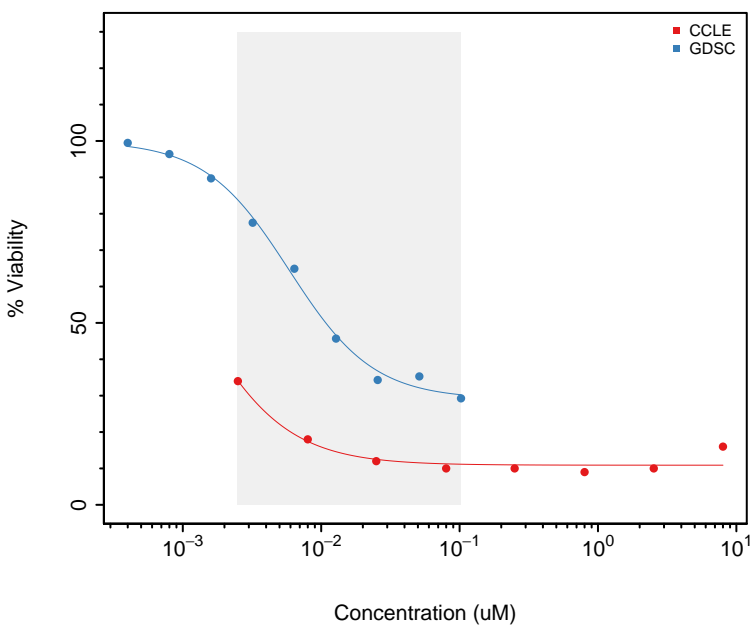

paclitaxel:HH

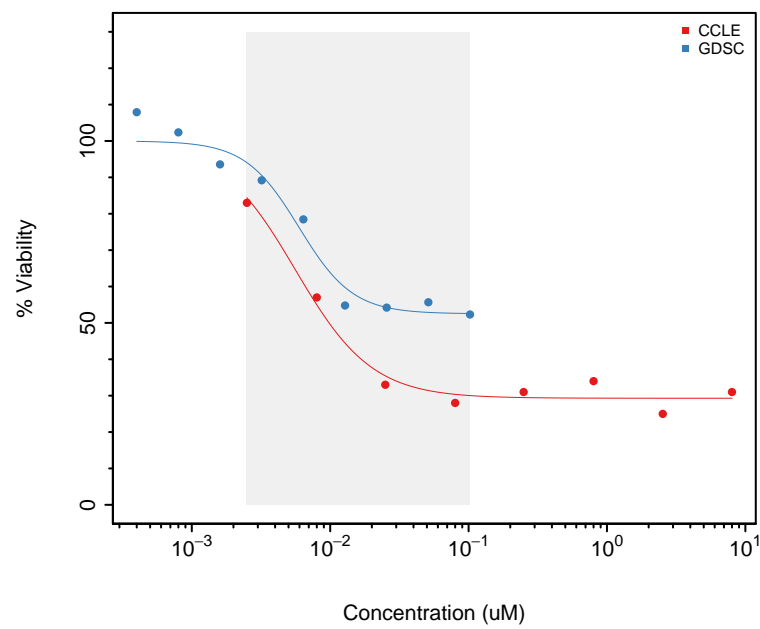

paclitaxel:HT

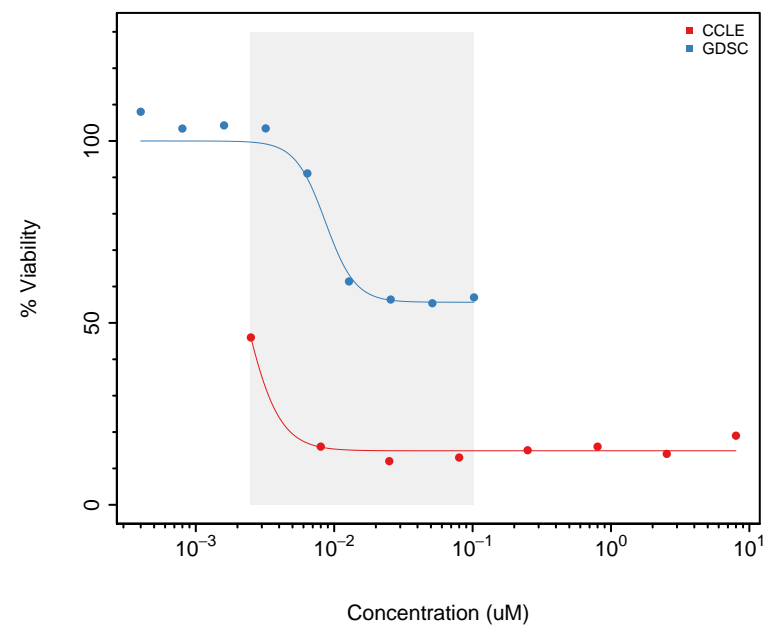

paclitaxel:HT-144

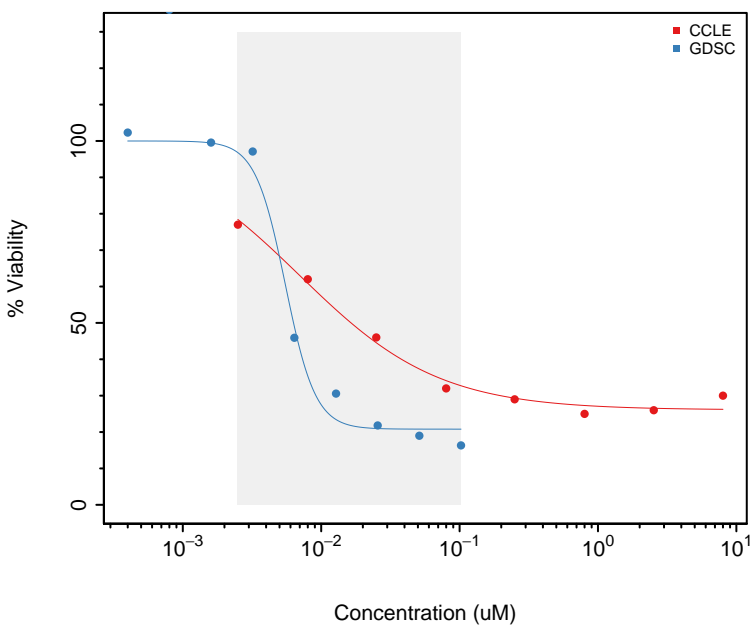

paclitaxel:IA-LM

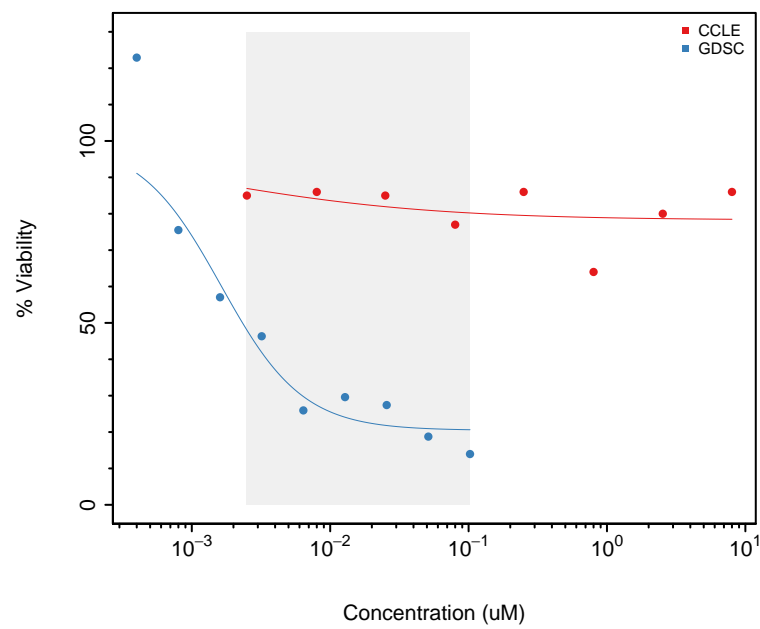

paclitaxel:IST-MES1

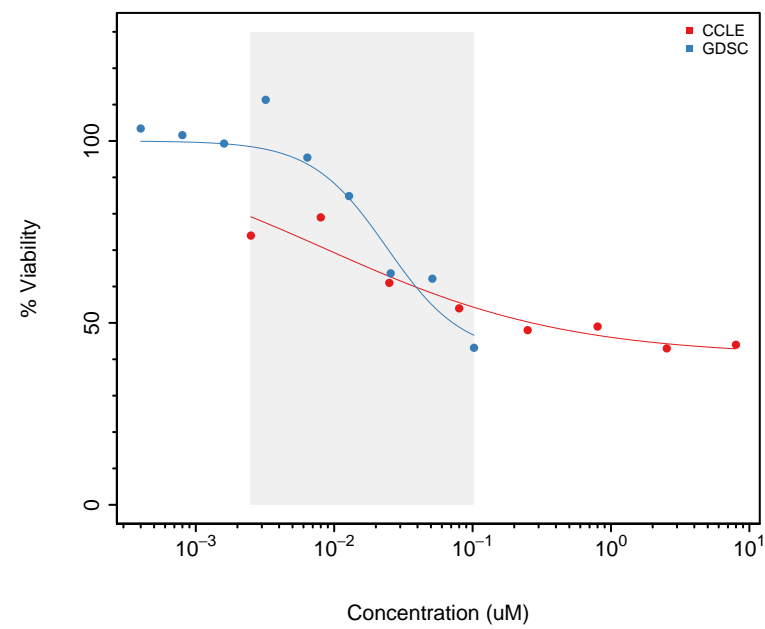

paclitaxel:JVM-3

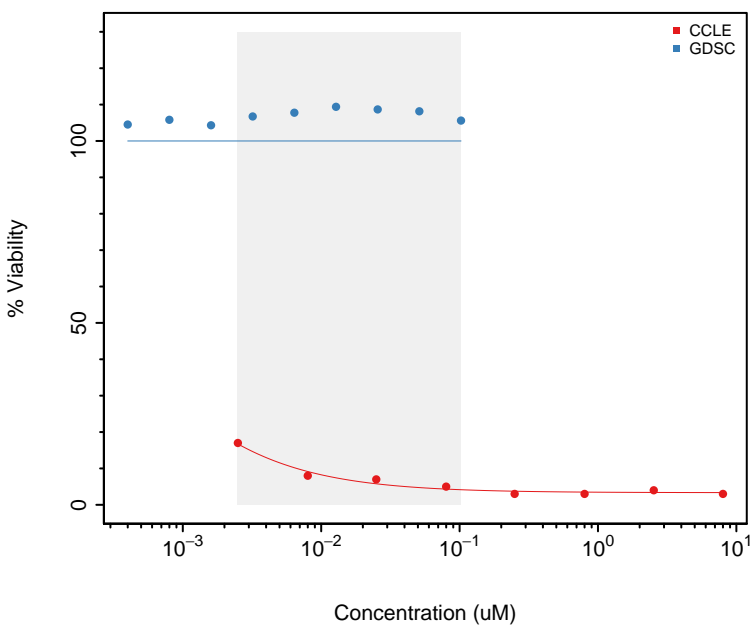

paclitaxel:KALS-1

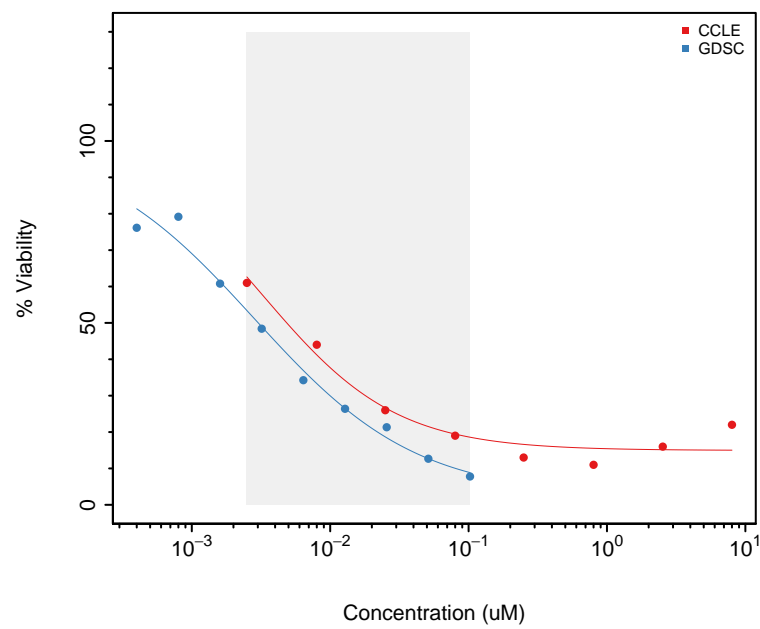

paclitaxel:KARPAS-299

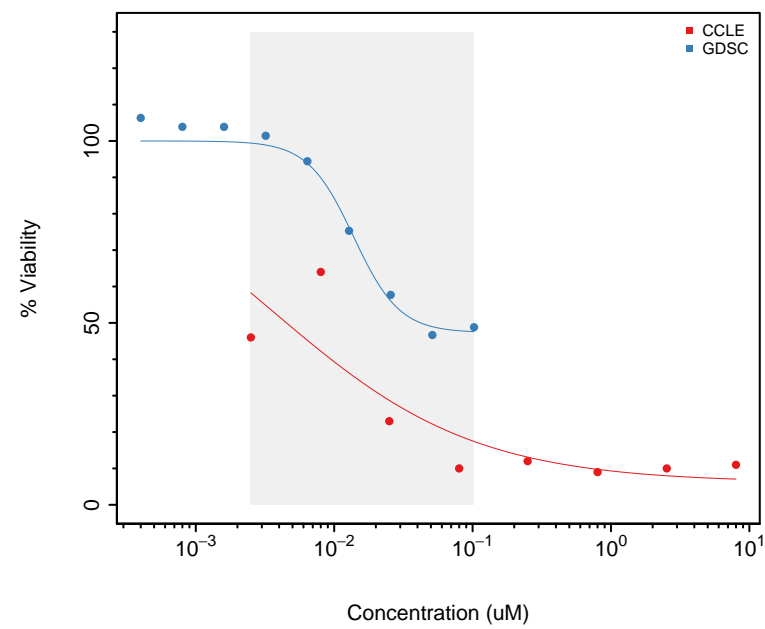

paclitaxel:KARPAS-422

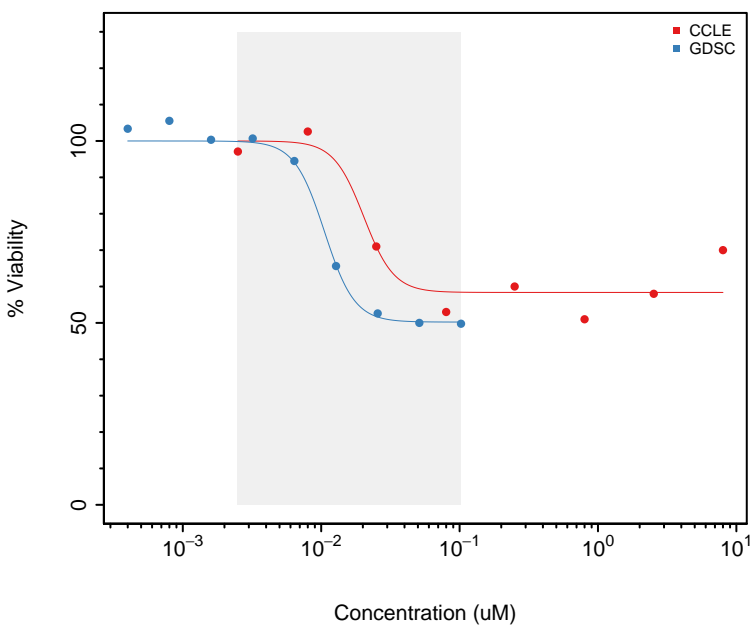

paclitaxel:KG-1

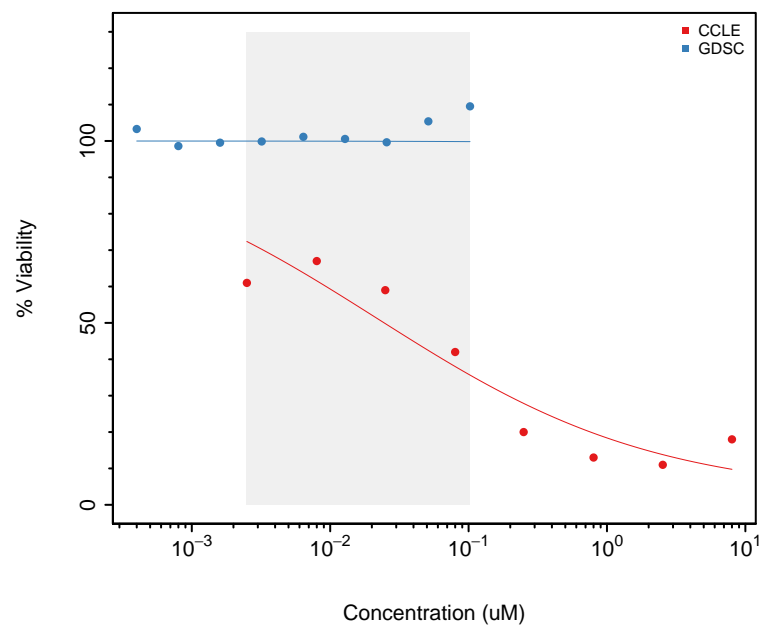

paclitaxel:KLE

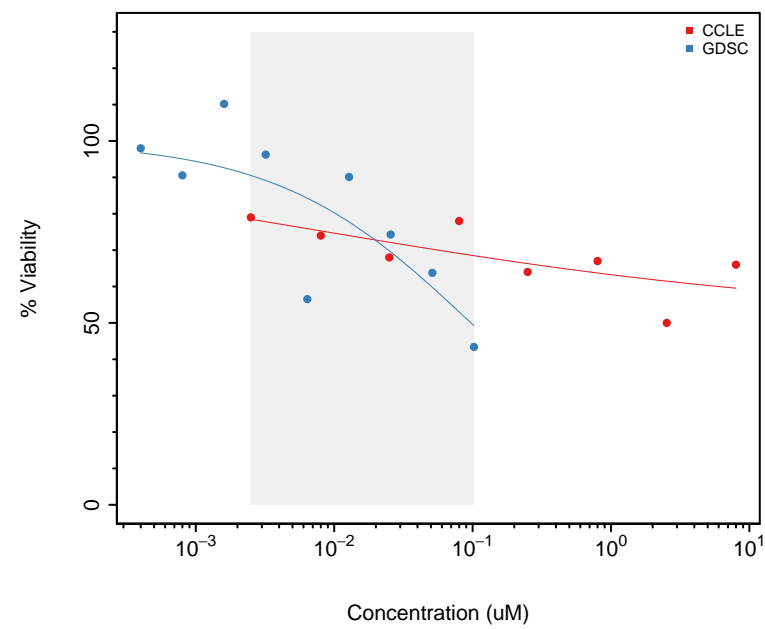

paclitaxel:KNS-42

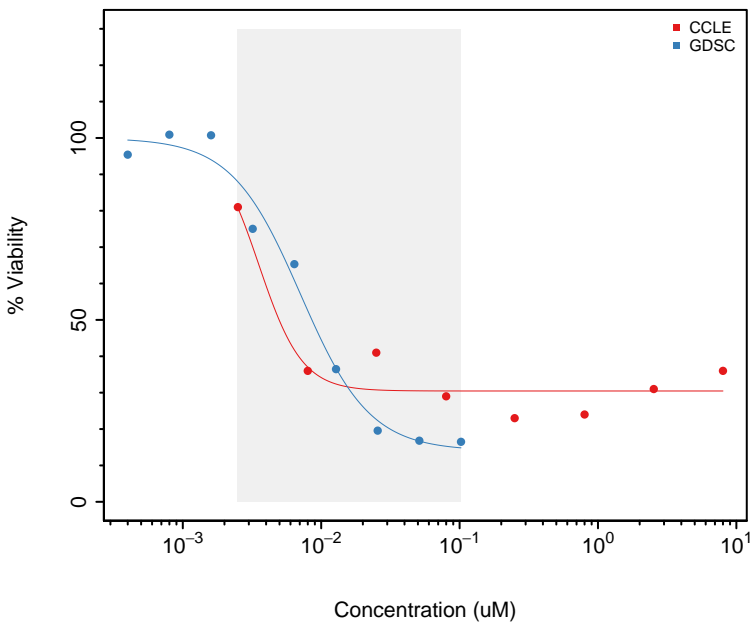

paclitaxel:KNS-81-FD

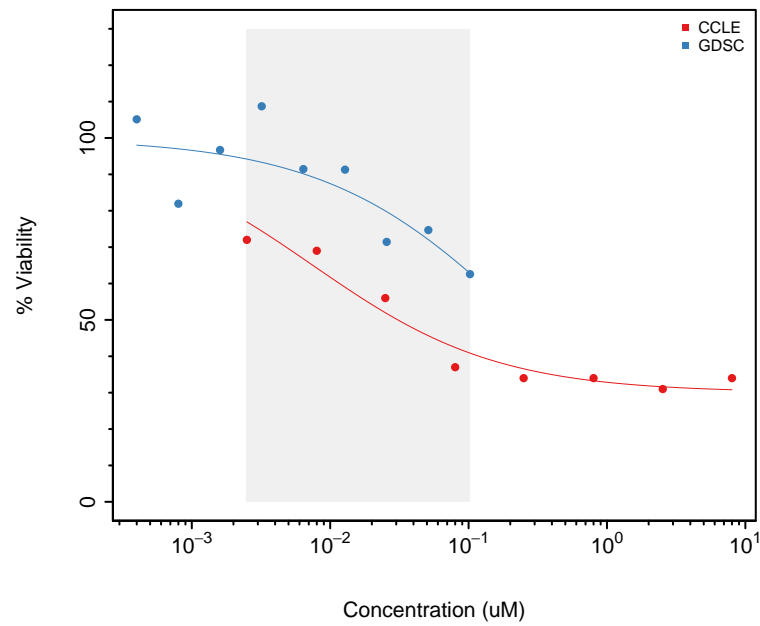

paclitaxel:K052

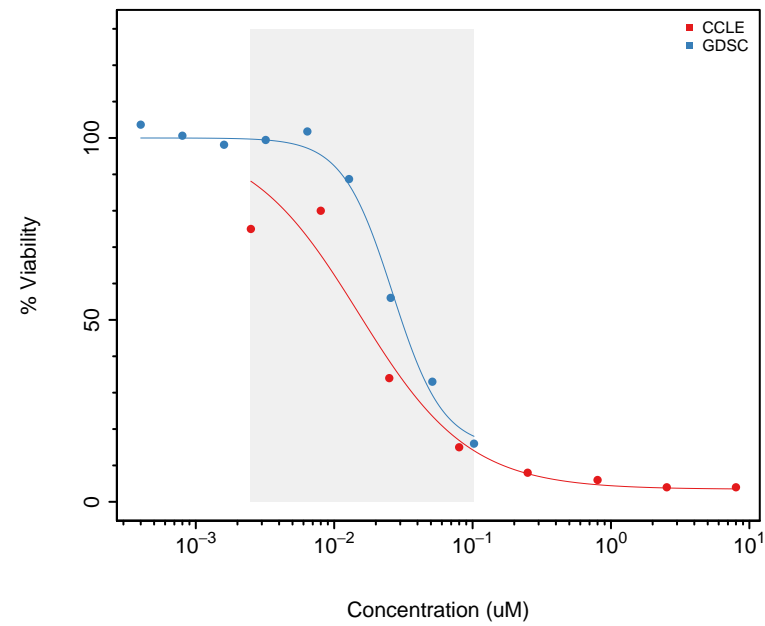

paclitaxel:KU812

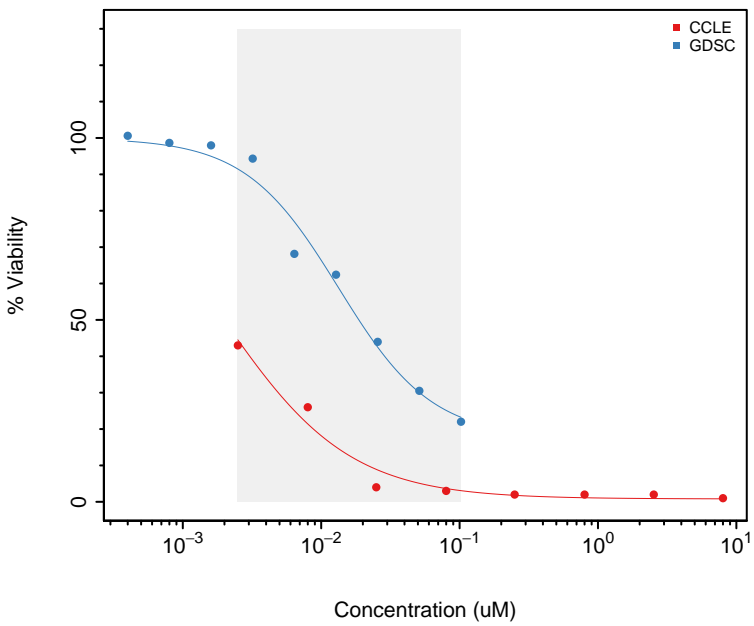

paclitaxel:KURAMOCHI

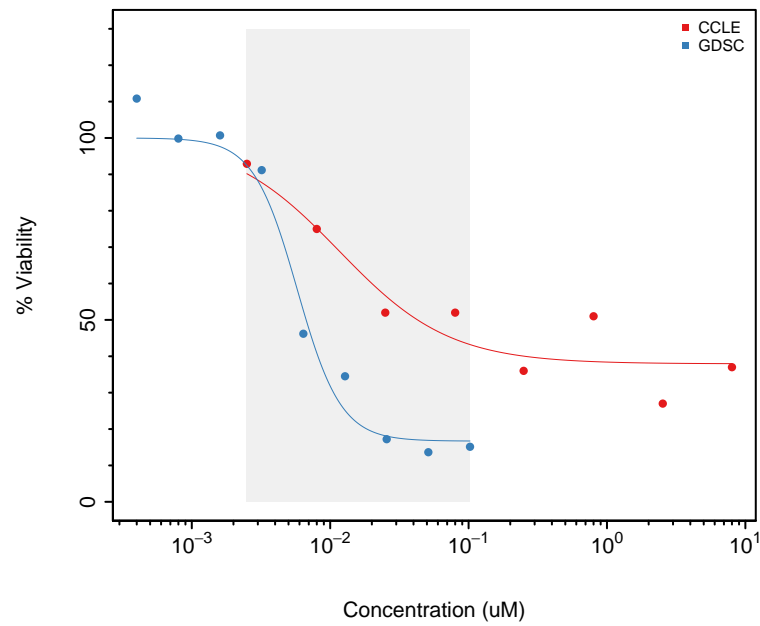

paclitaxel:L-363

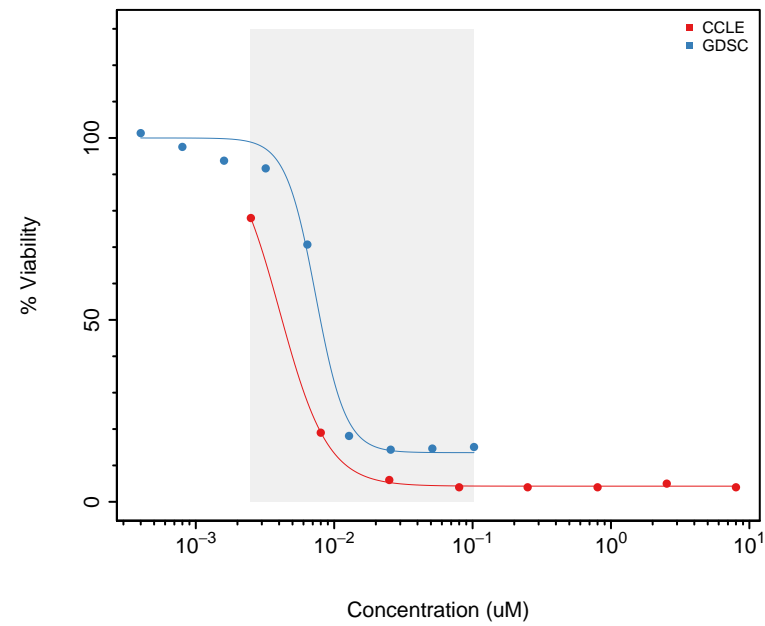

paclitaxel:L-428

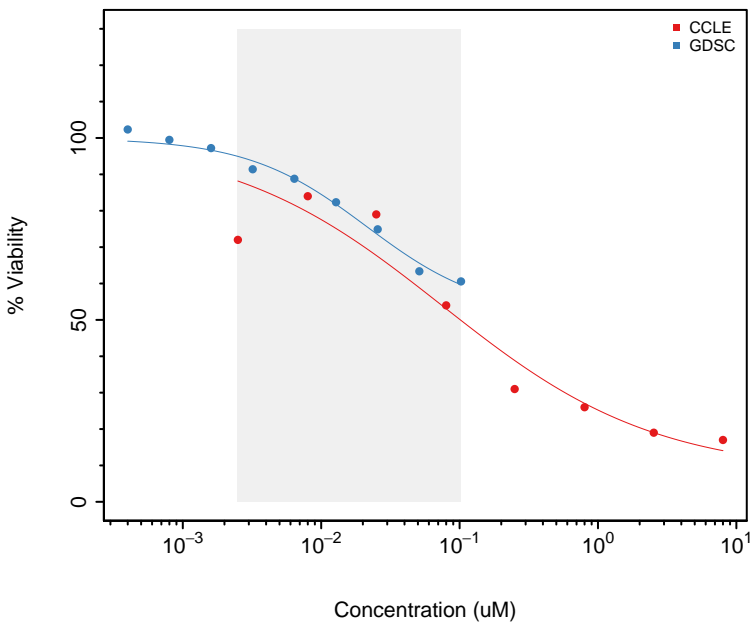

paclitaxel:LOXIMVI

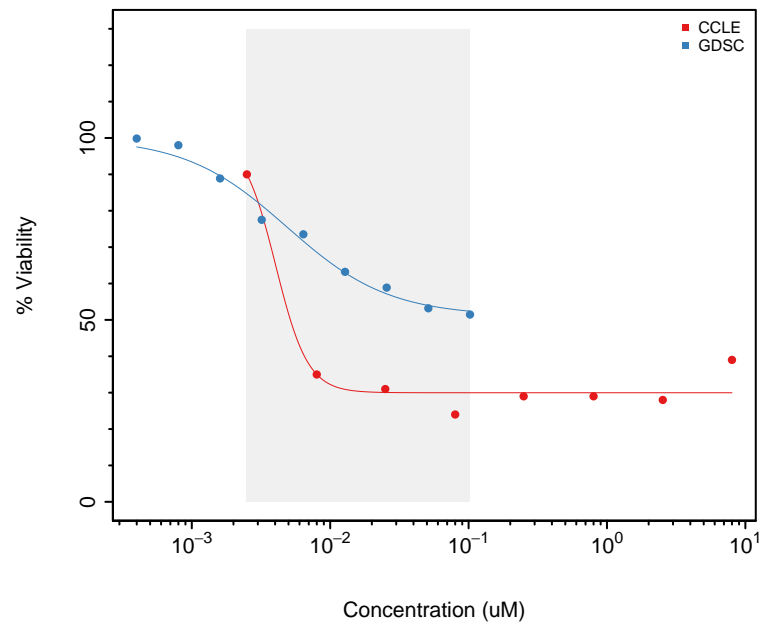

paclitaxel:LP-1

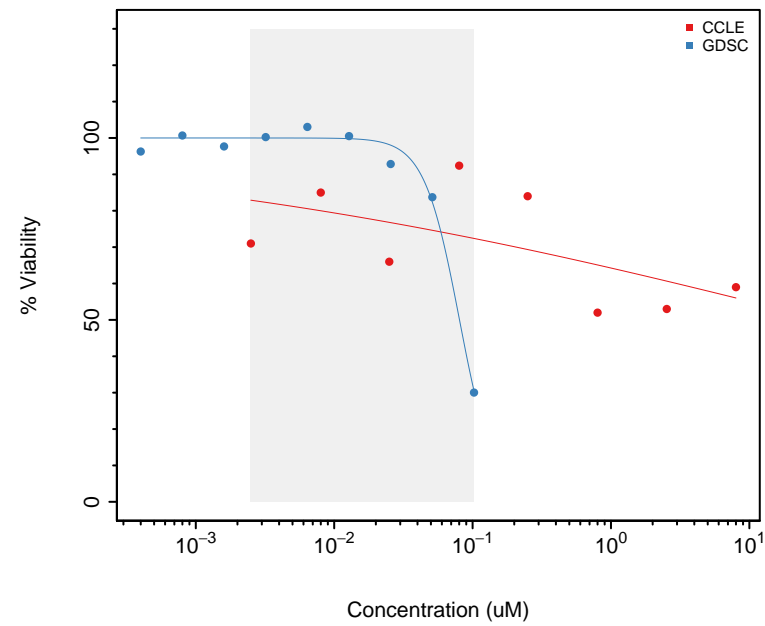



paclitaxel:NCI-H1666

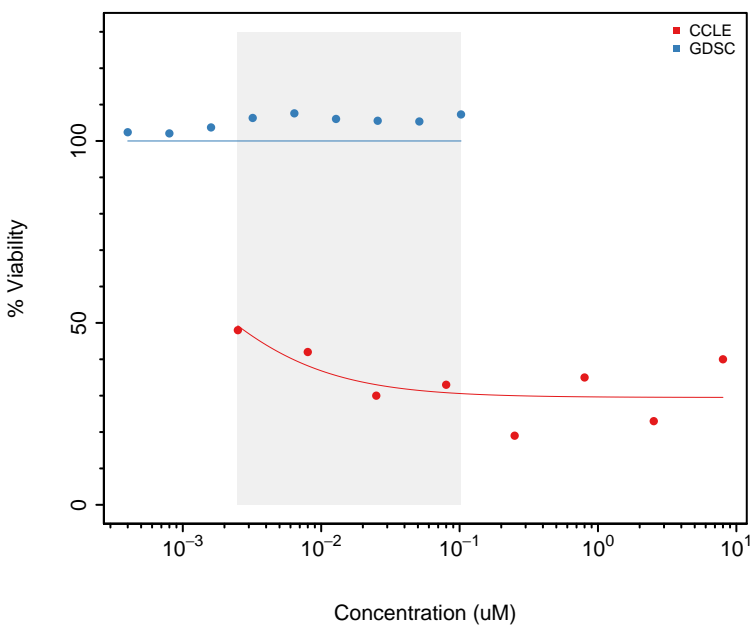

paclitaxel:NCI-H1694

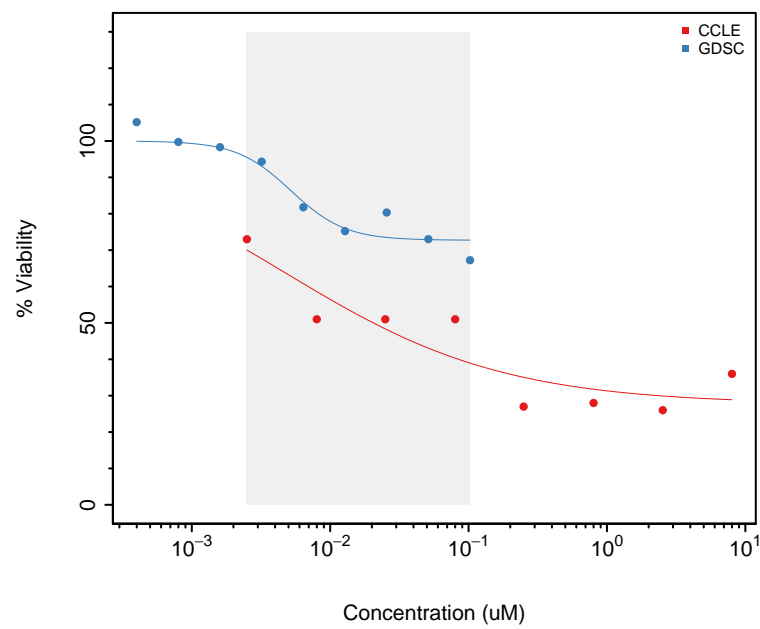

paclitaxel:NCI-H1975

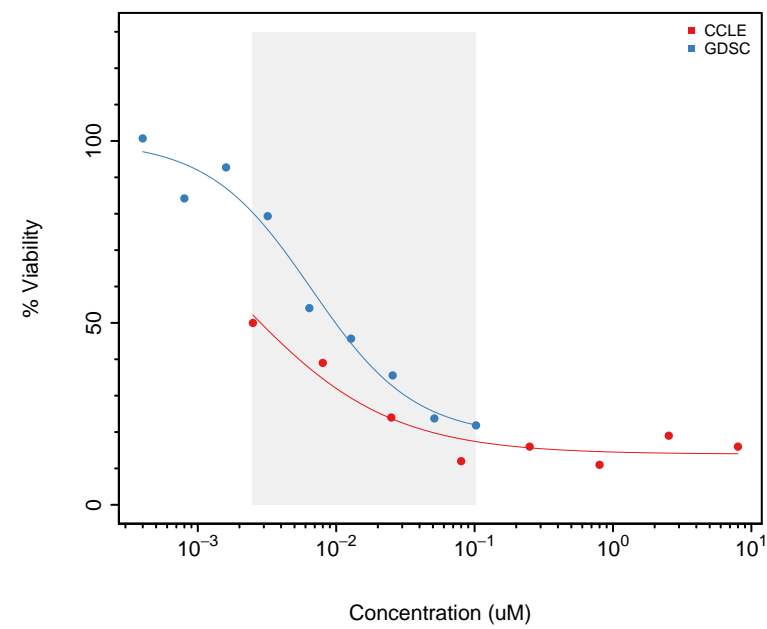

paclitaxel:NCI-H226

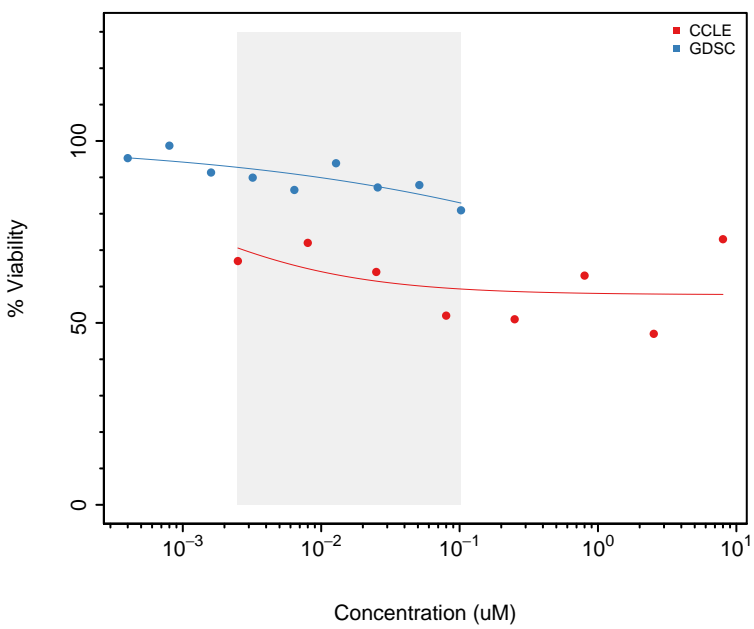

paclitaxel:NCI-H23

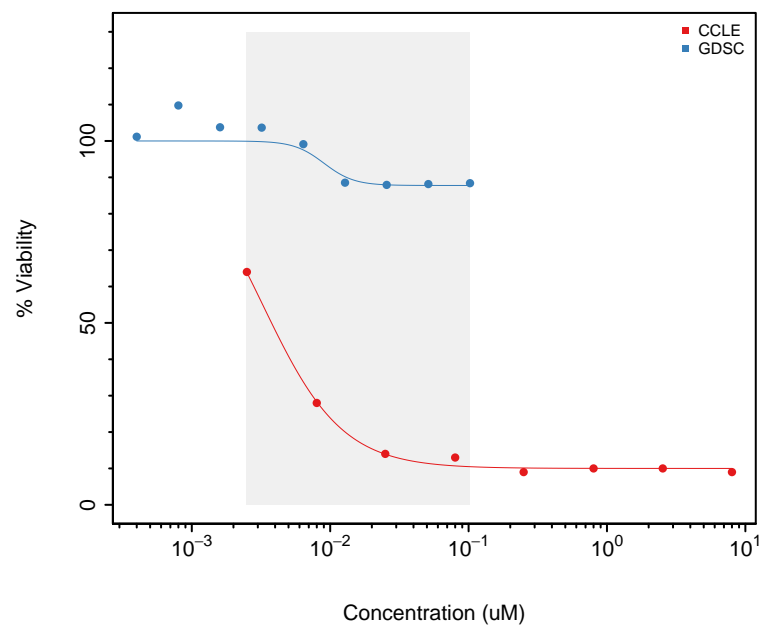

paclitaxel:NCI-H747

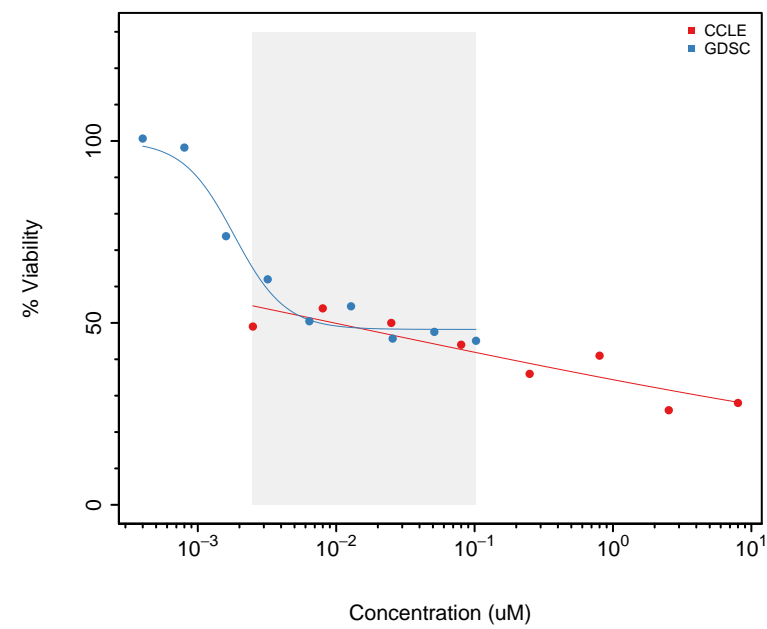

paclitaxel:OCI-AML2

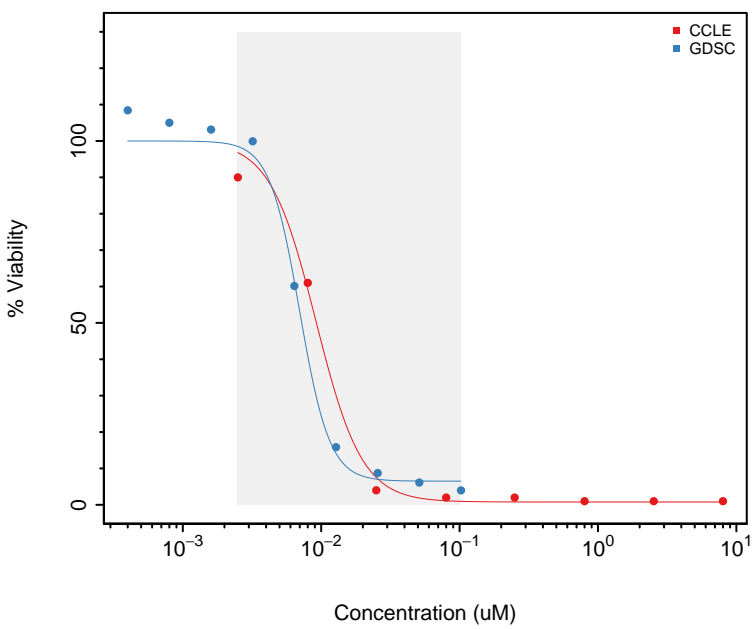

paclitaxel:OPM-2

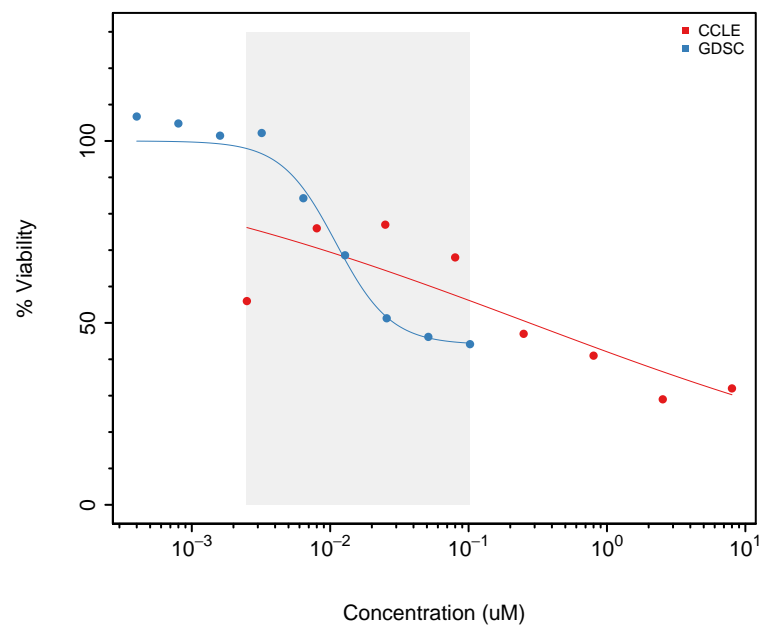

paclitaxel:OVCAR-4

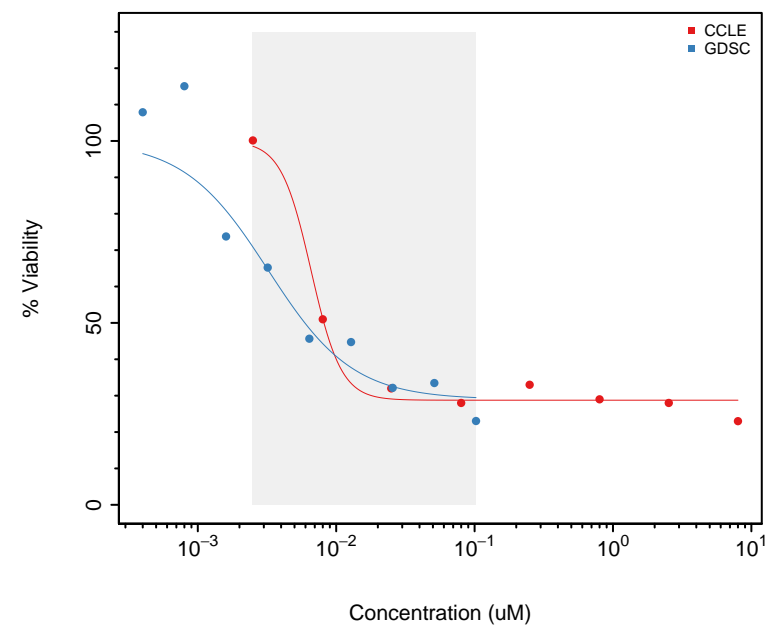

paclitaxel:P31-FUJ

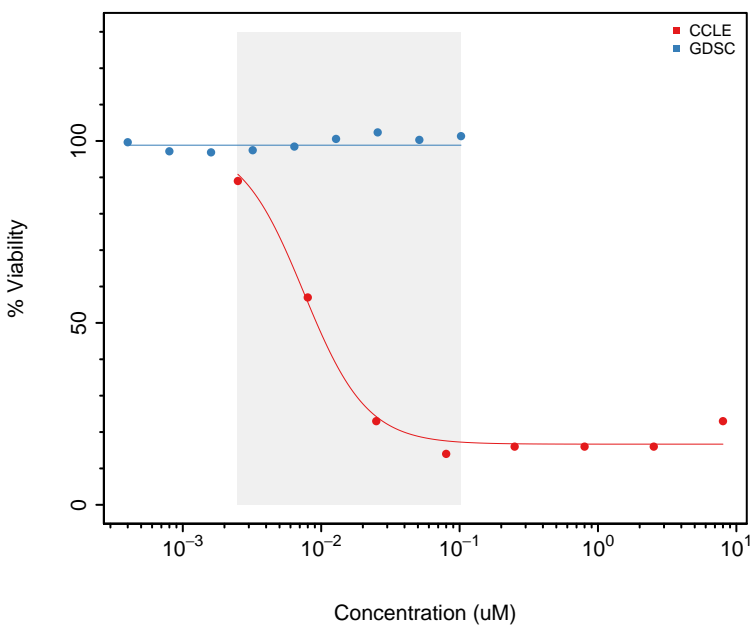

paclitaxel:PSN1

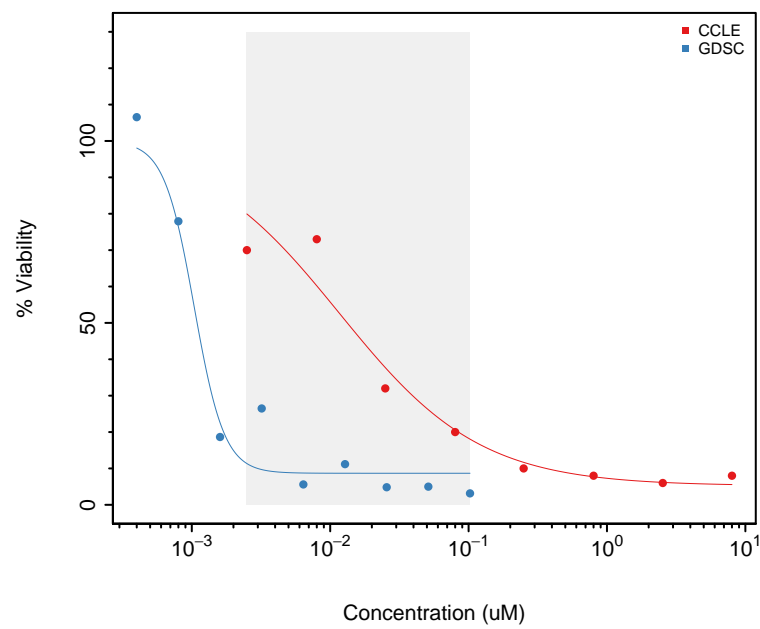

paclitaxel:Raji

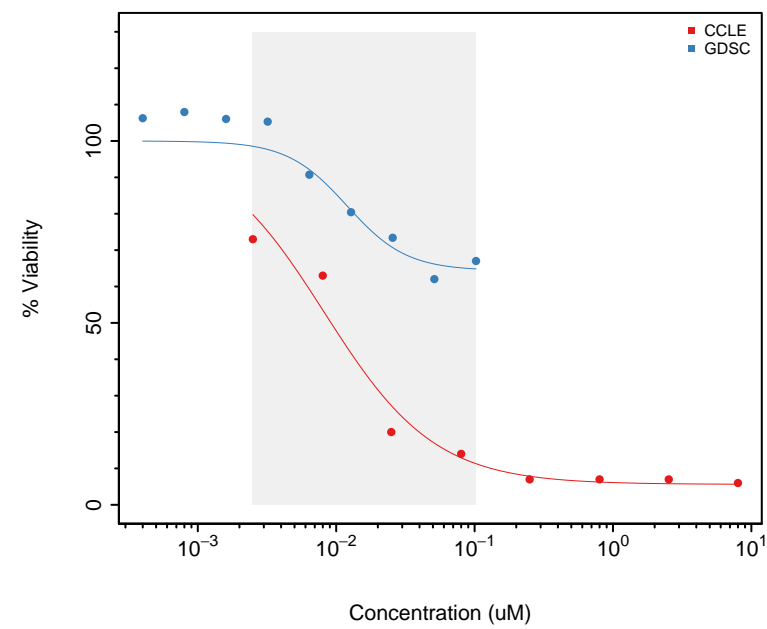

paclitaxel:REH

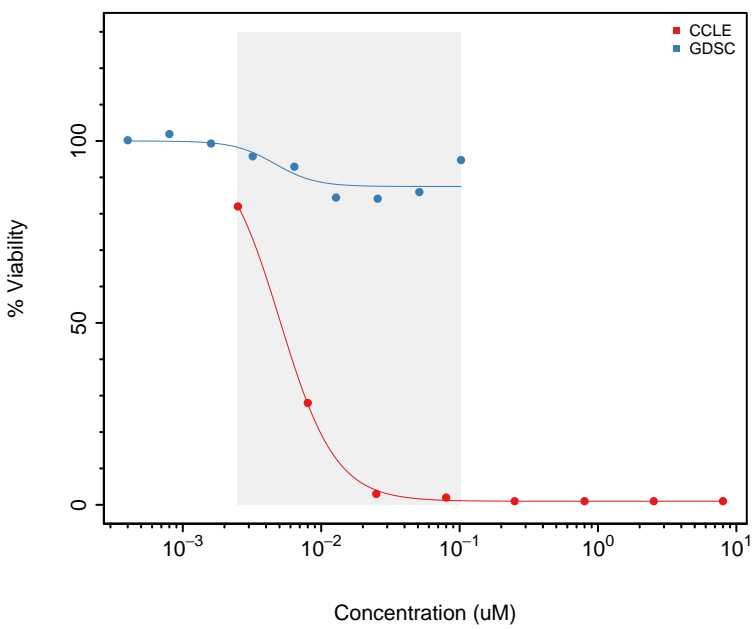

paclitaxel:RKO

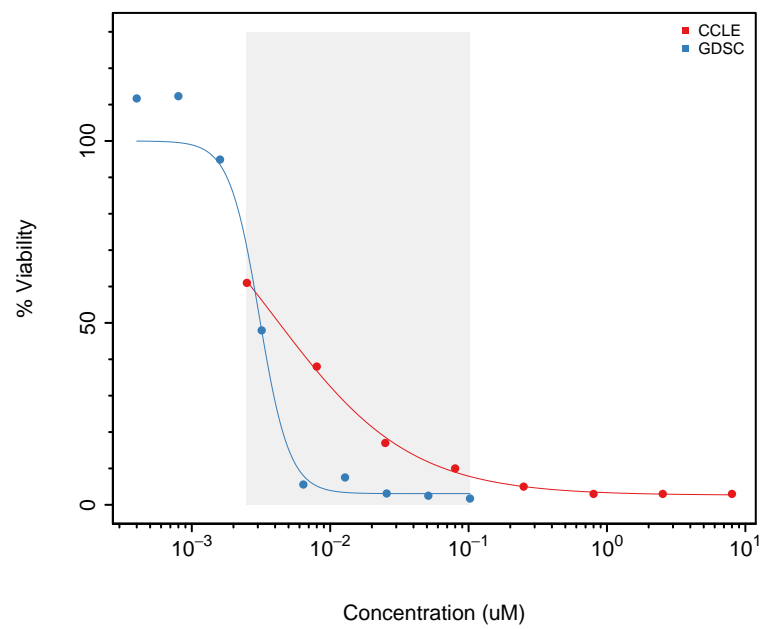

paclitaxel:RL95-2

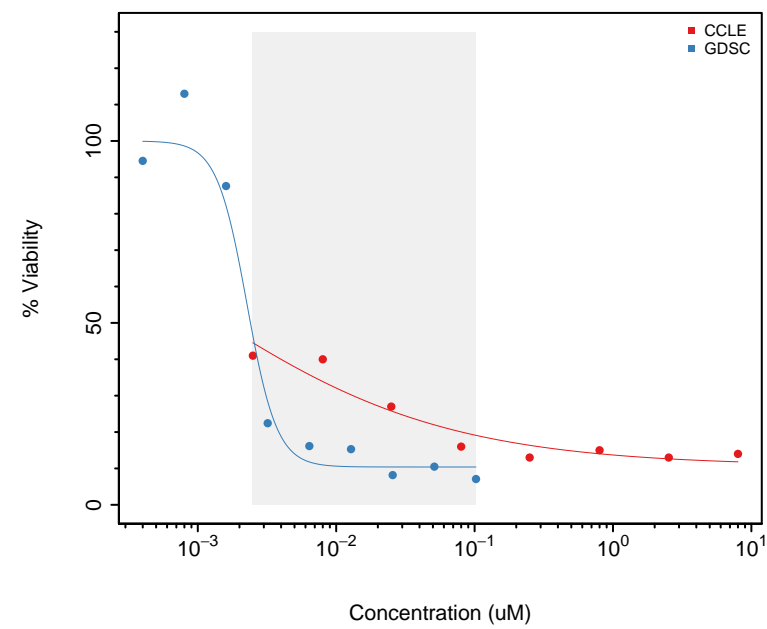

paclitaxel:RPMI-8402

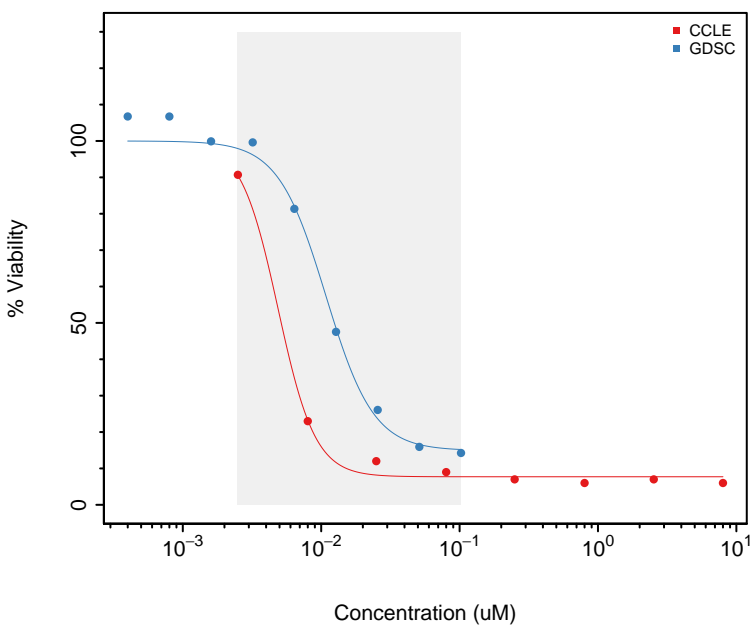

paclitaxel:SF126

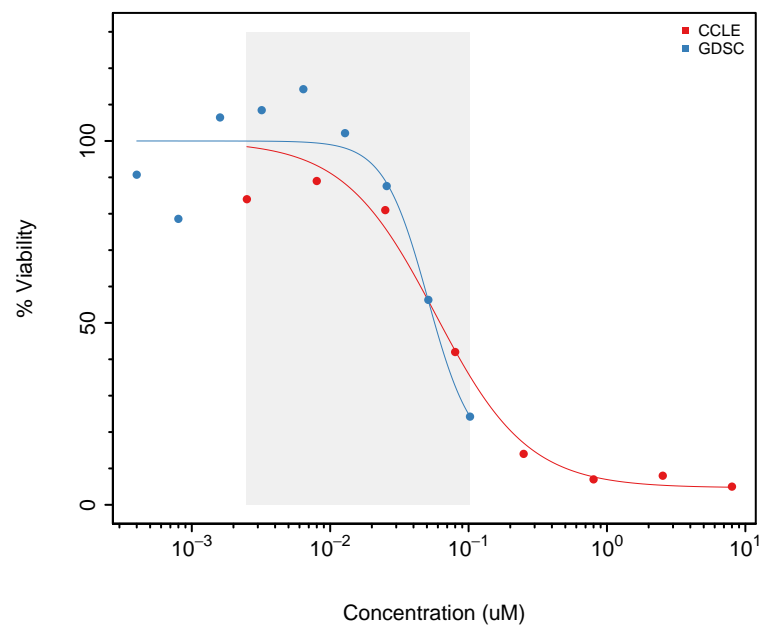

paclitaxel:SHP-77

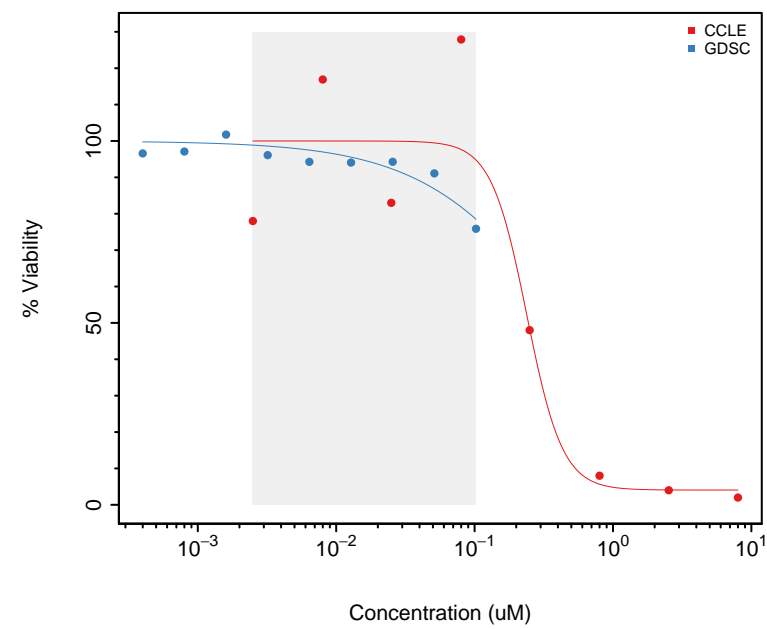

paclitaxel:SIG-M5

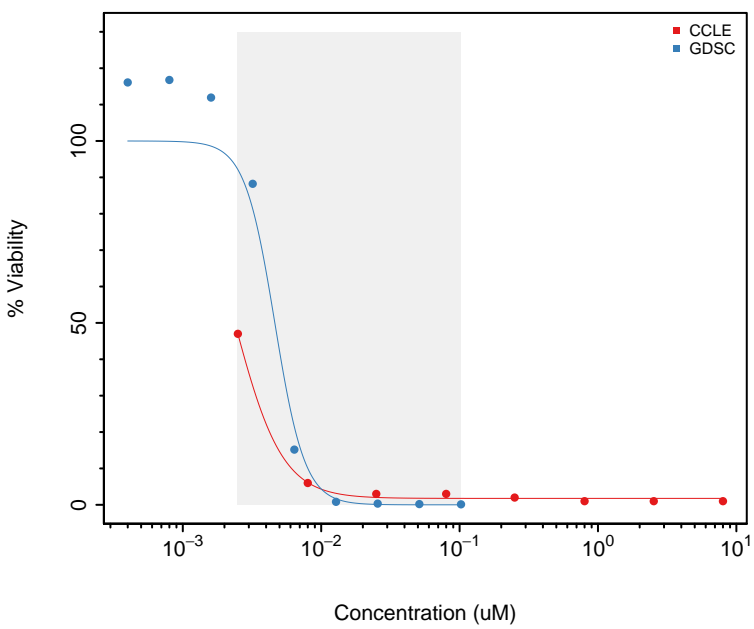

paclitaxel:SIMA

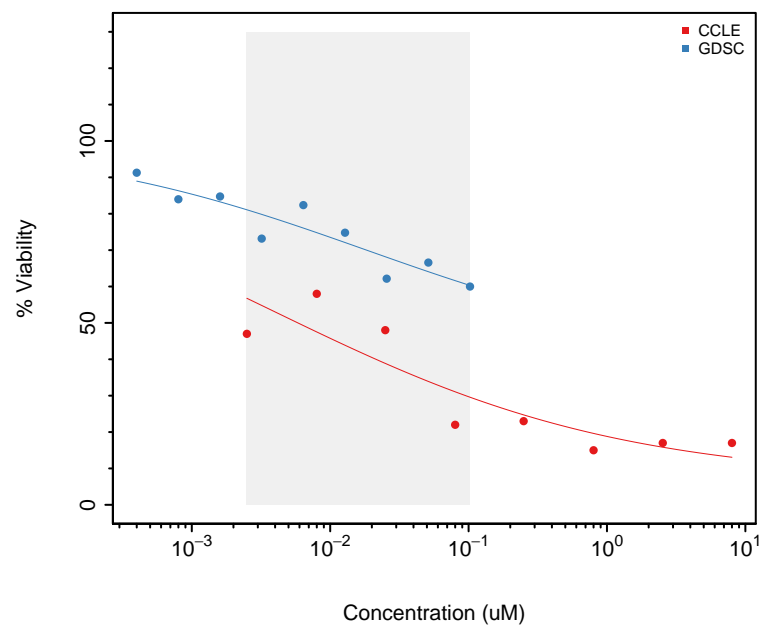

paclitaxel:SJSA-1

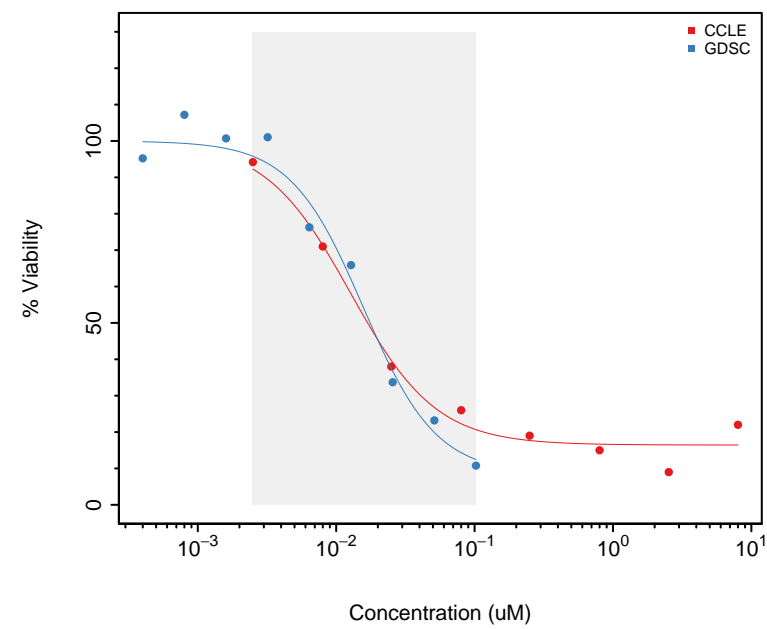

paclitaxel:SK-LMS-1

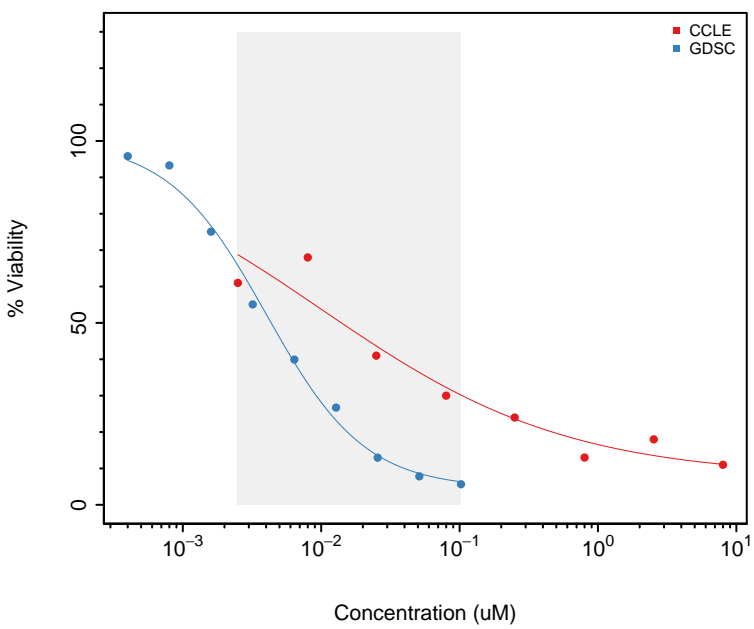

paclitaxel:SK-MEL-2

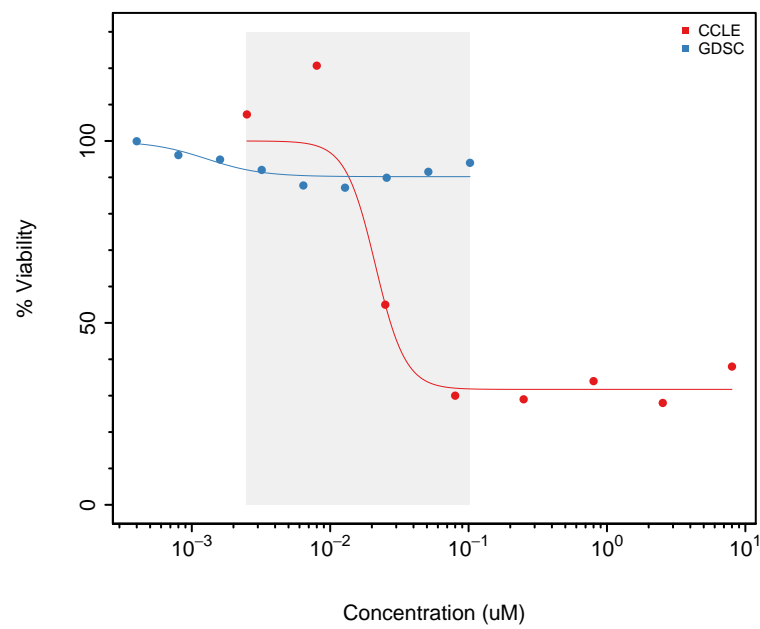

paclitaxel:SK-MM-2

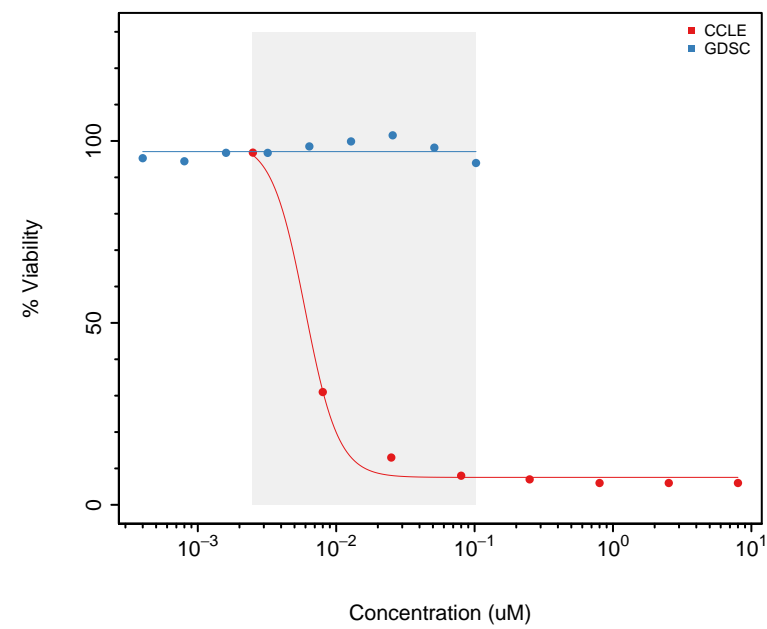

paclitaxel:SK-N-DZ

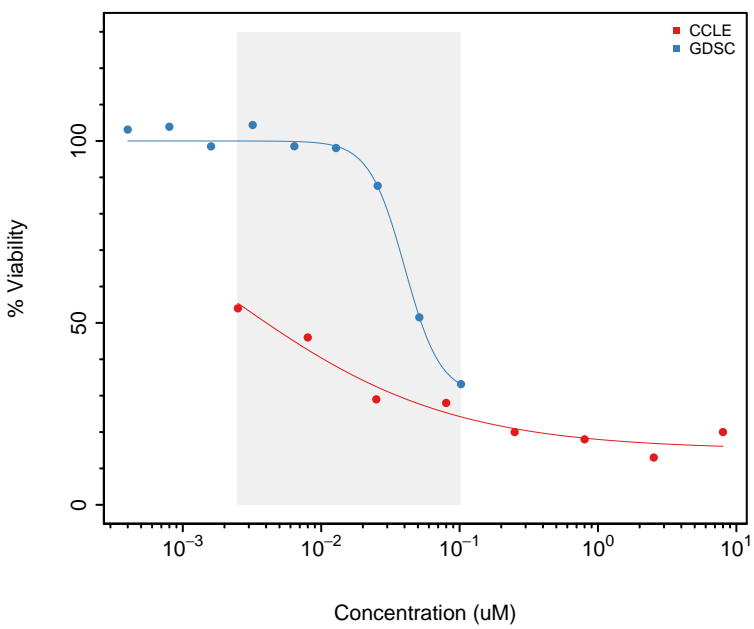

paclitaxel:SK-N-FI

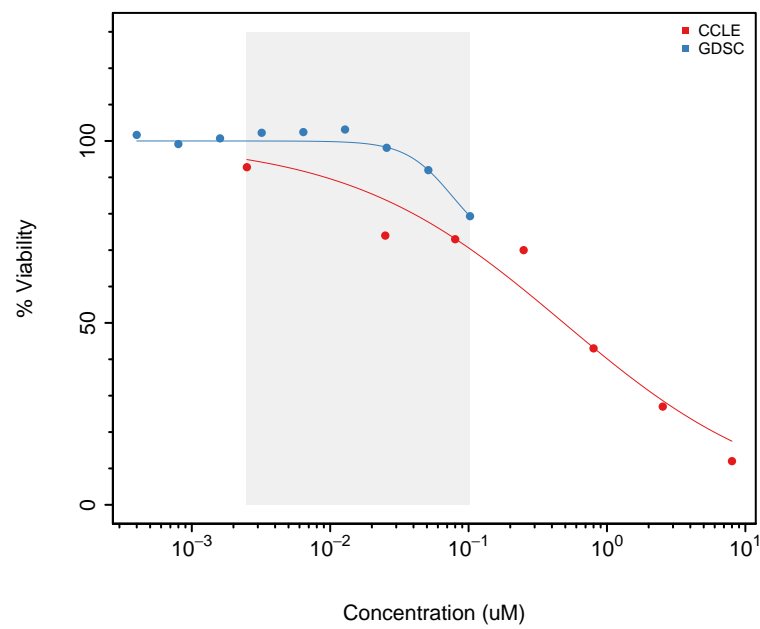

paclitaxel:NCI-SNU-1

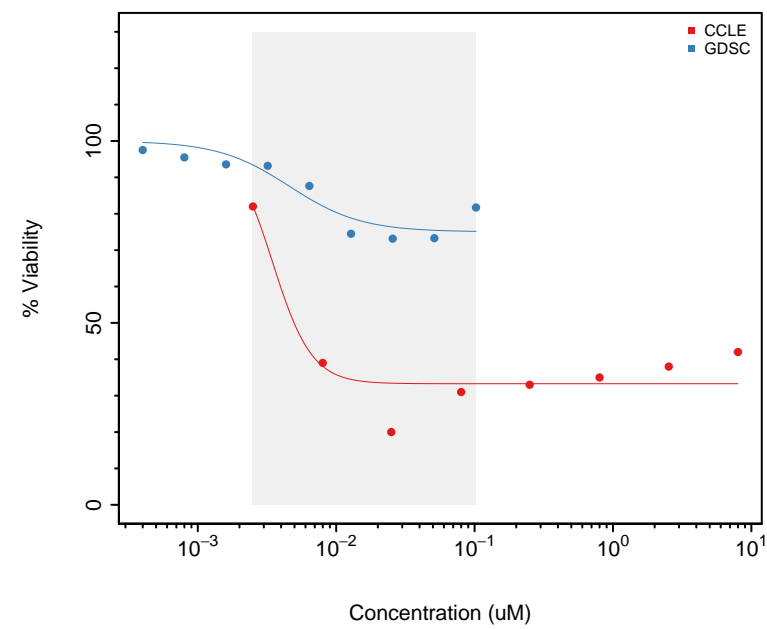

paclitaxel:NCI-SNU-16

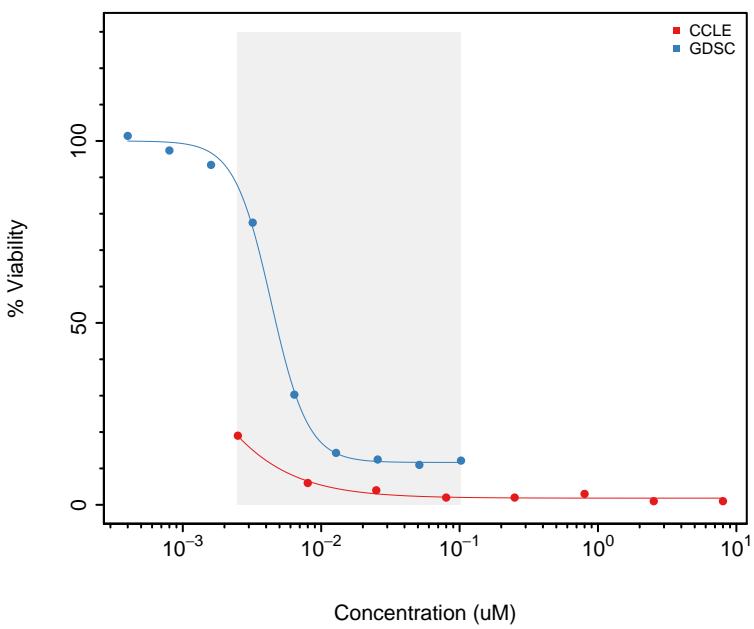

paclitaxel:SNU-C2B

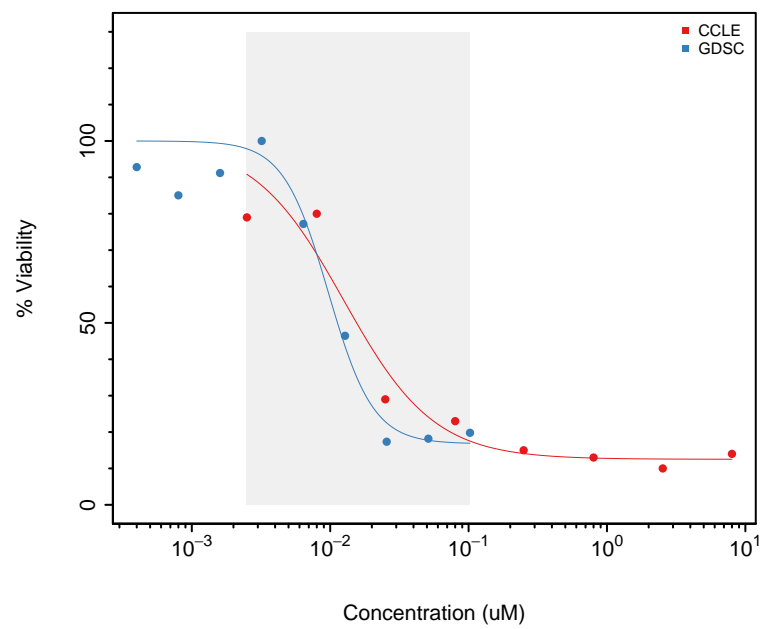

paclitaxel:SUP-T1

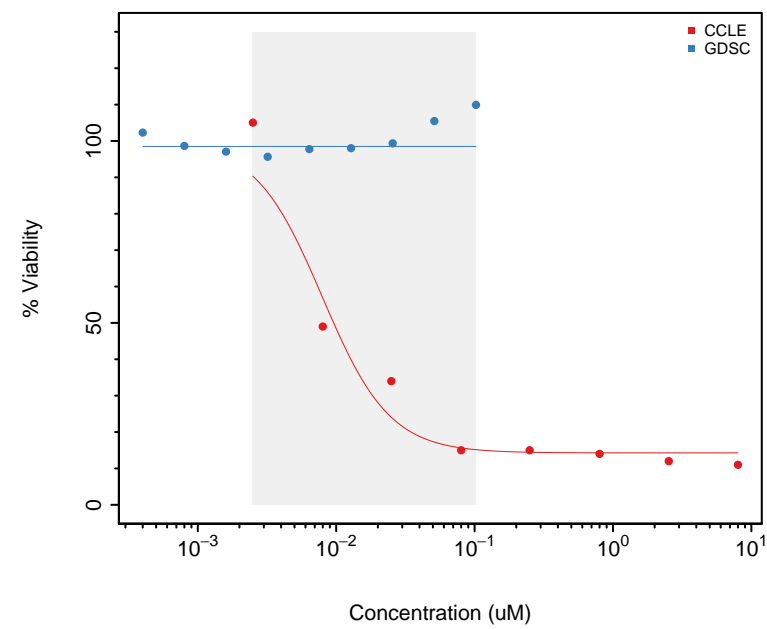

paclitaxel:TE-1

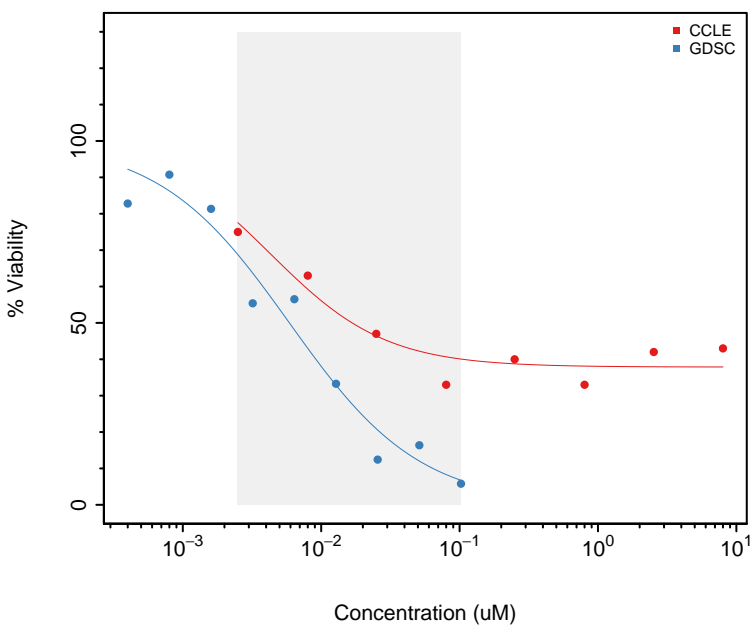

paclitaxel:TE-11

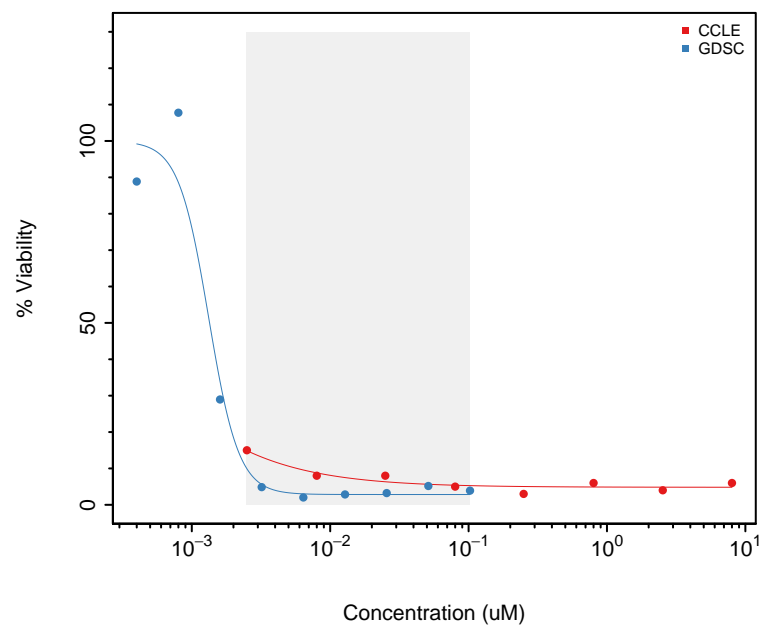

paclitaxel:TE-15

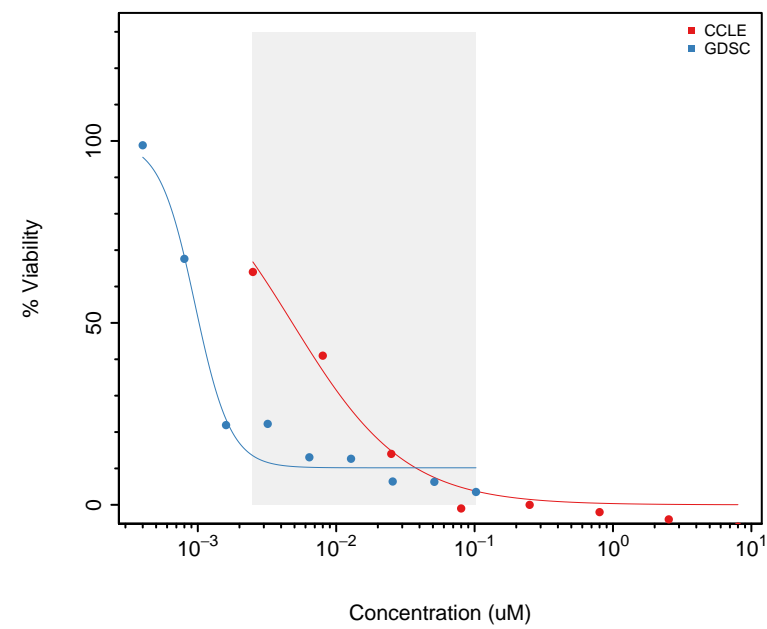

paclitaxel:TE-5

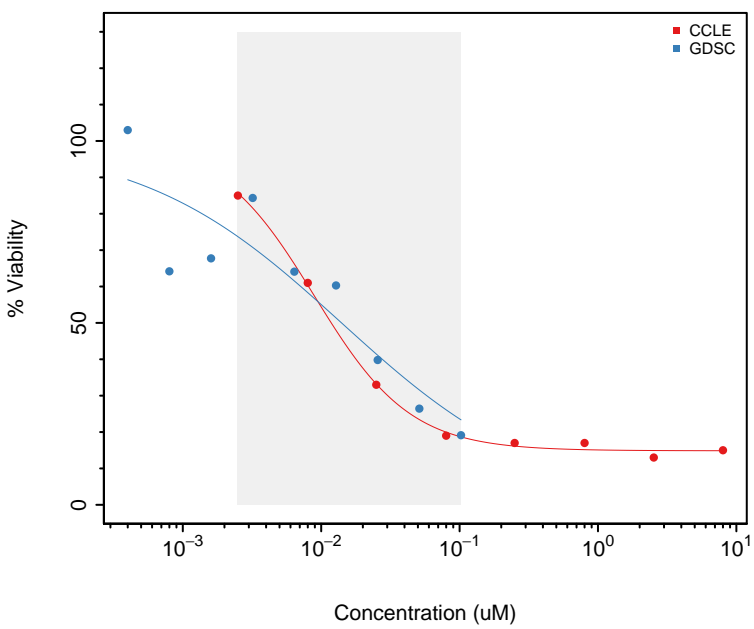

paclitaxel:TE-9

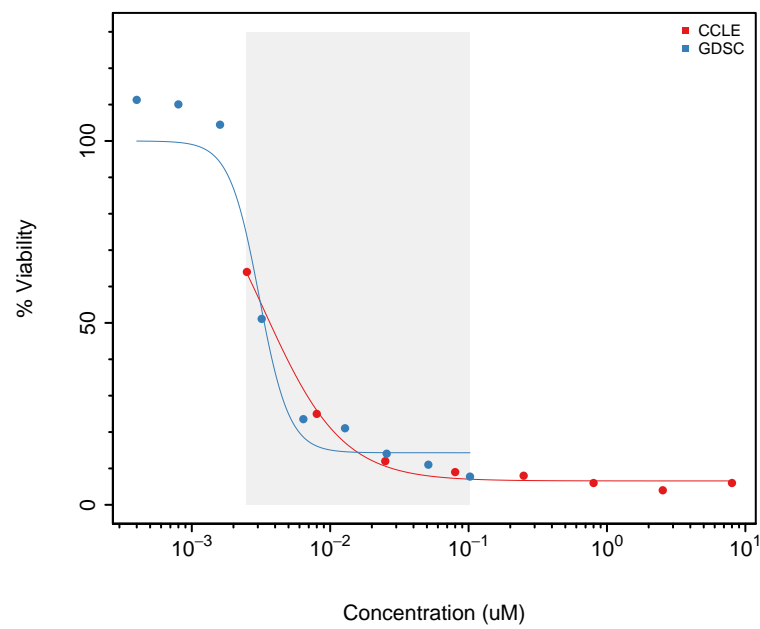

paclitaxel:U-87-MG

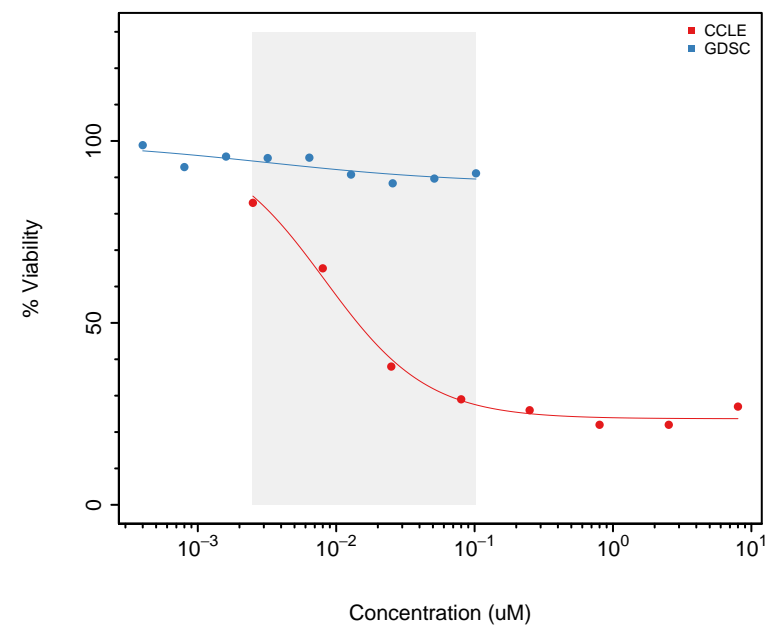



paclitaxel:UACC-257

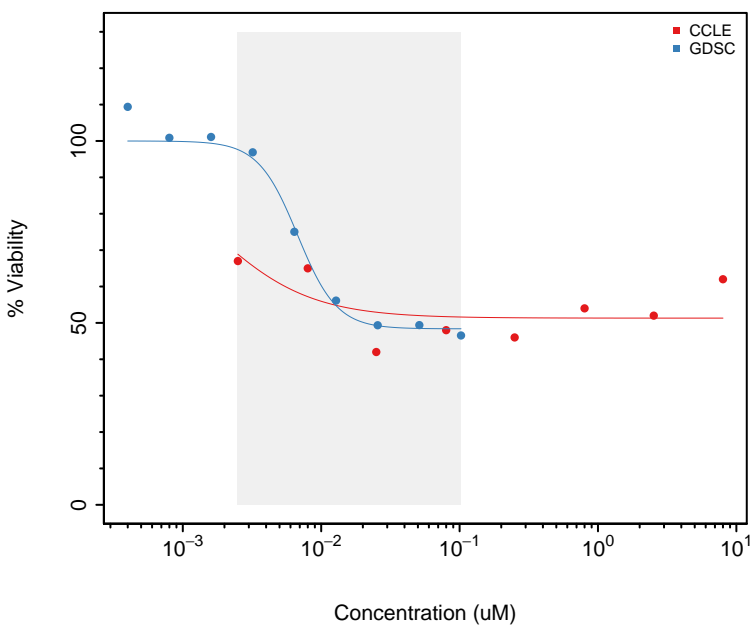

AZD6244:22RV1

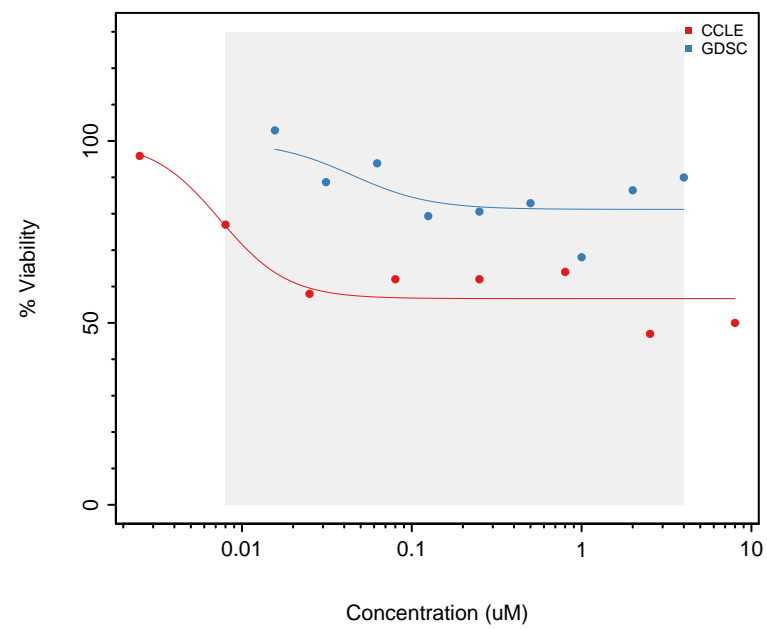

AZD6244:5637

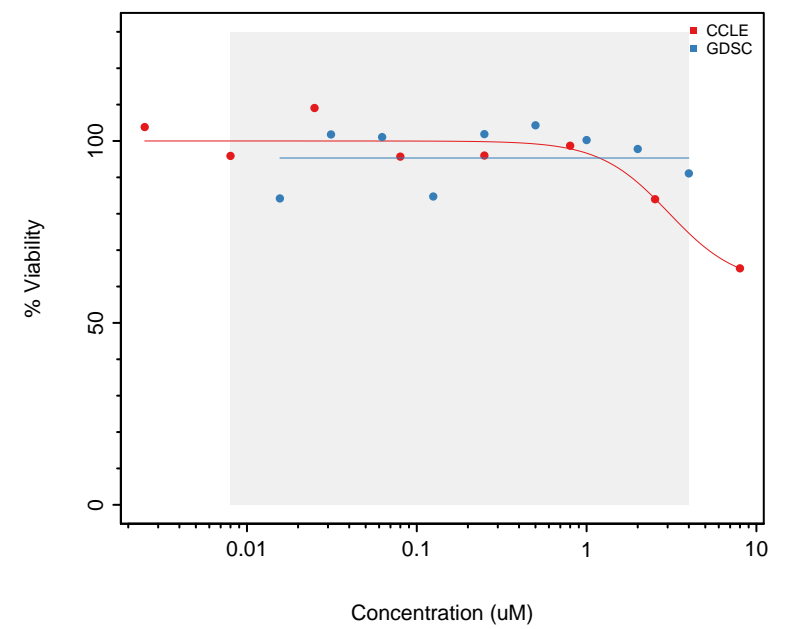

AZD6244:639-V

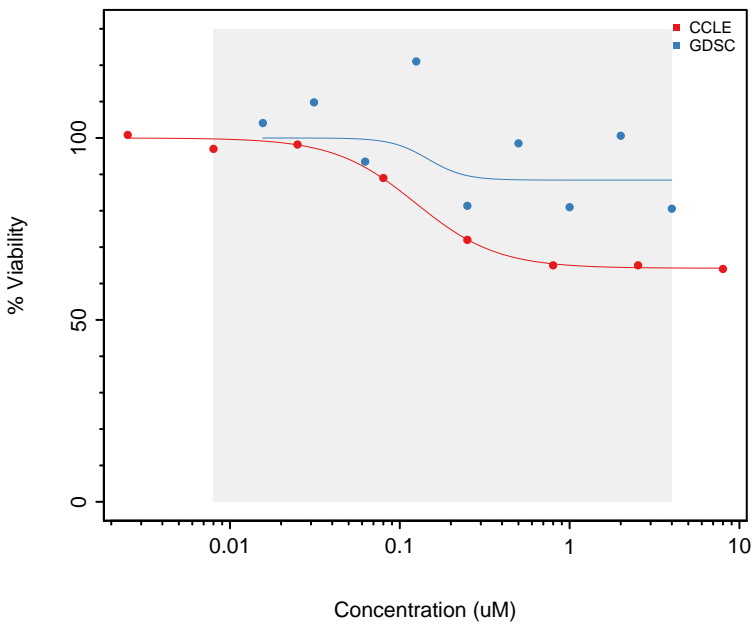

AZD6244:697

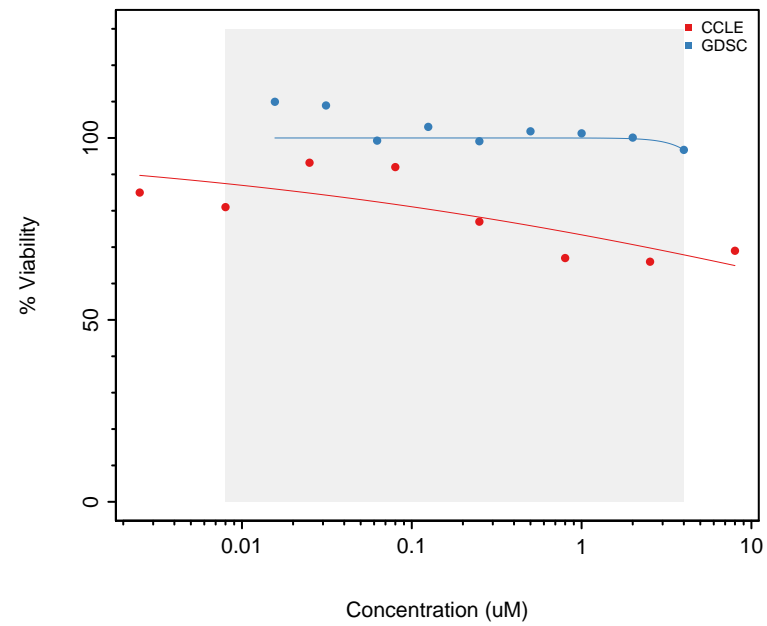

AZD6244:786-0

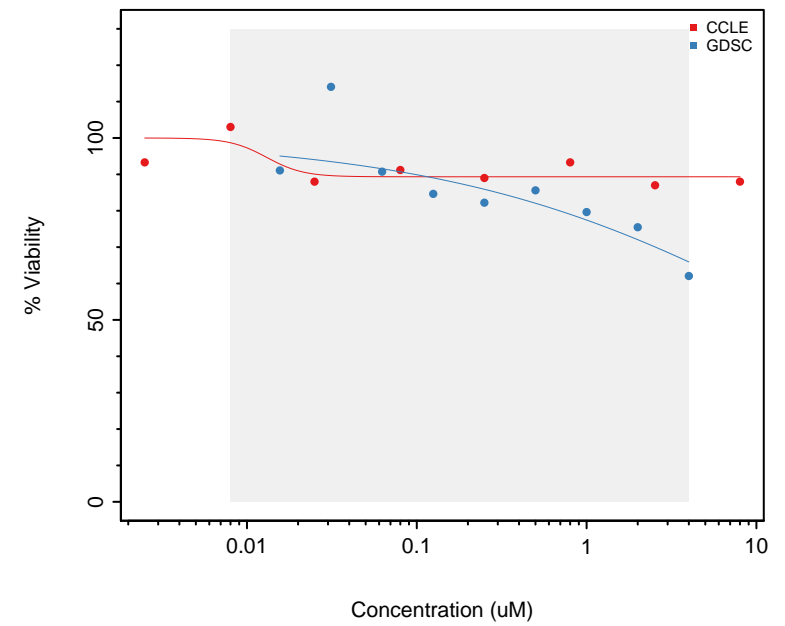

AZD6244:8305C

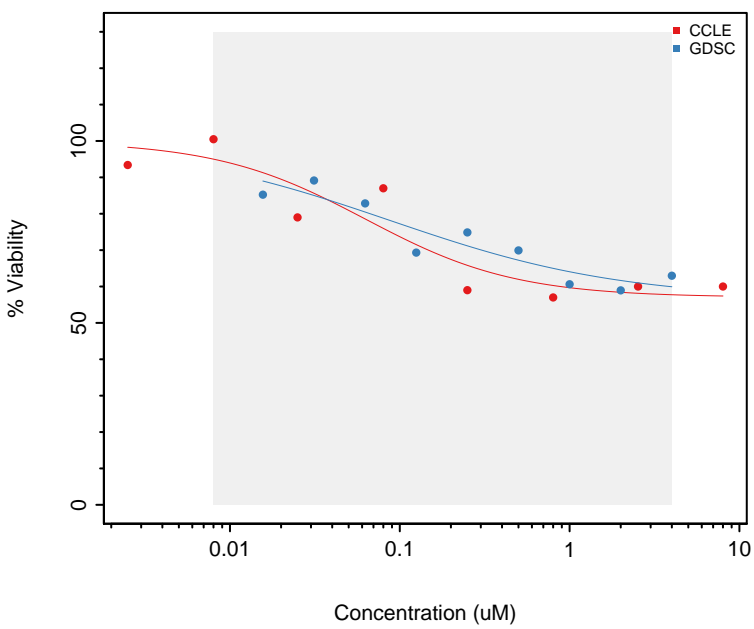

AZD6244:8505C

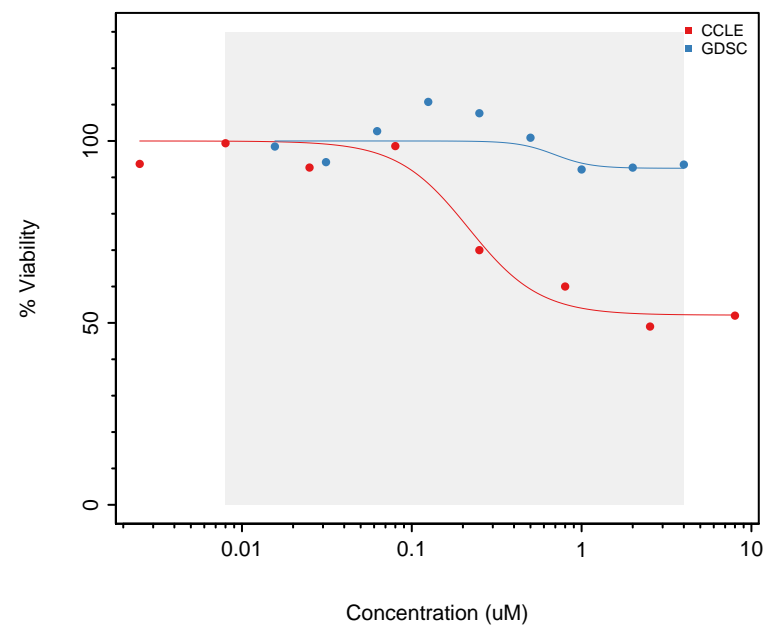

AZD6244:8-MG-BA

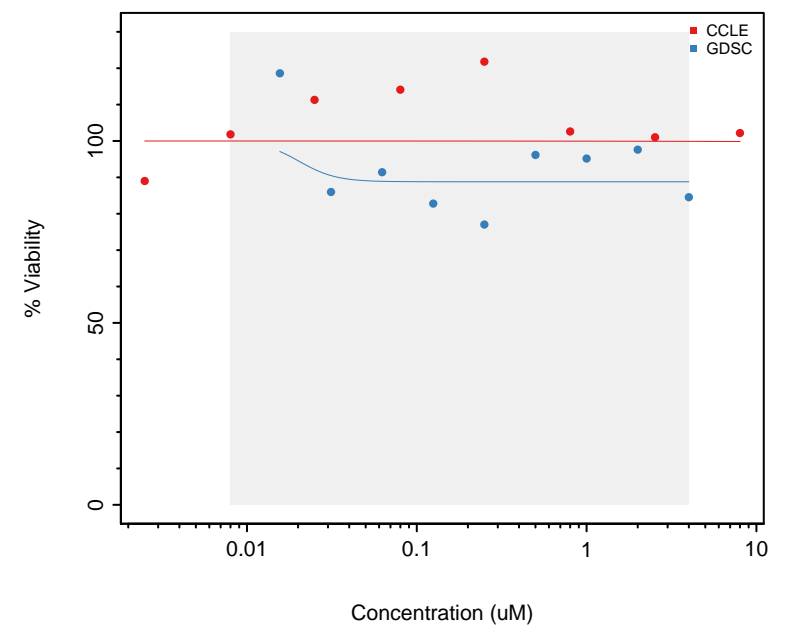

AZD6244:A204

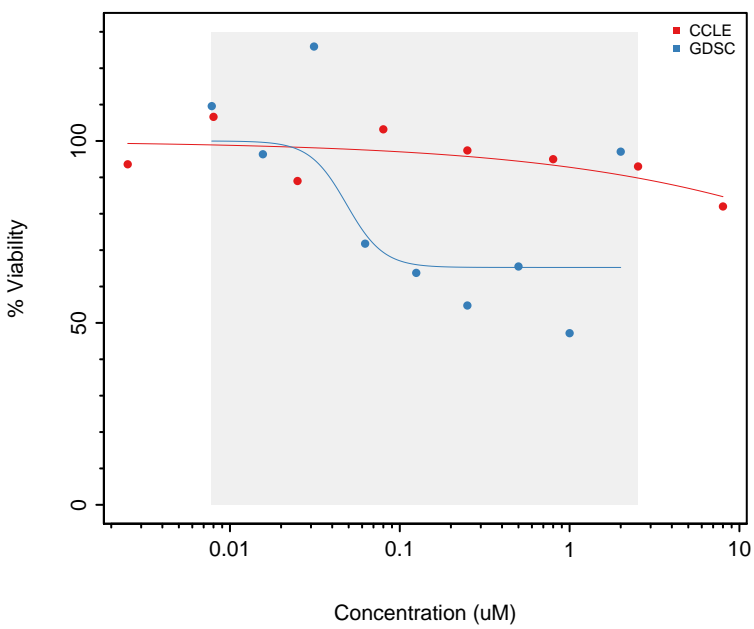

AZD6244:A253

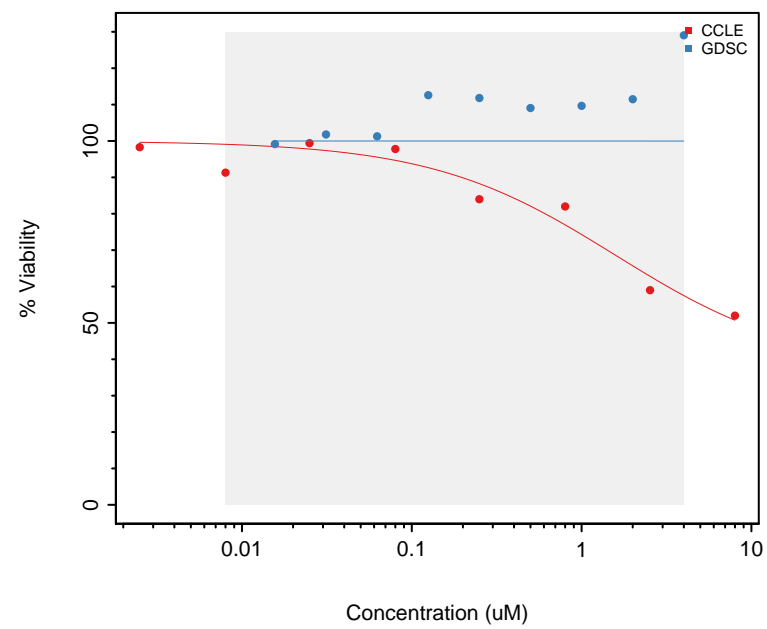

AZD6244:A2780

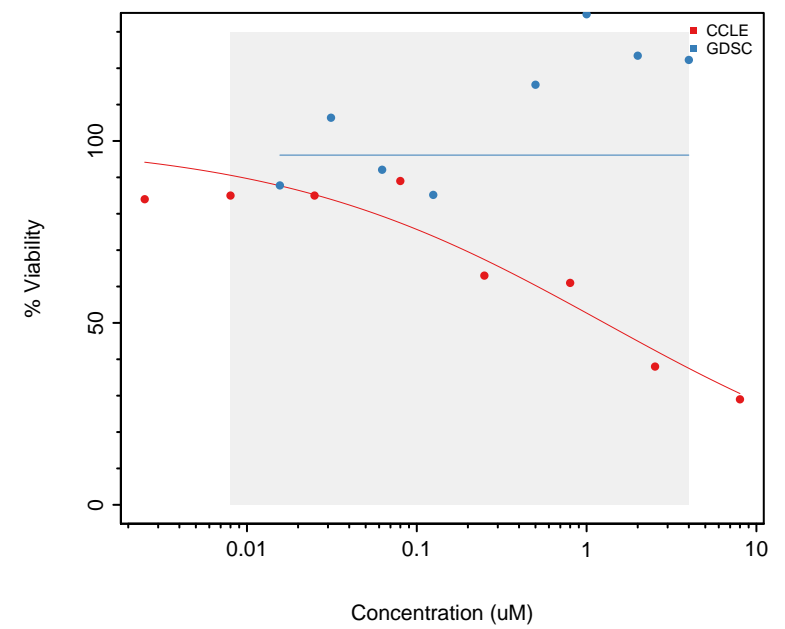





AZD6244:CHP-212

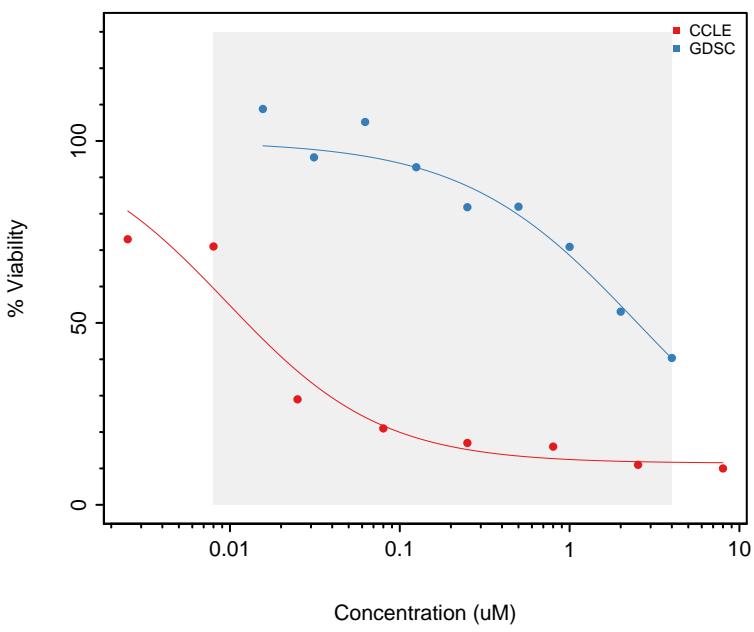

AZD6244:COLO-205

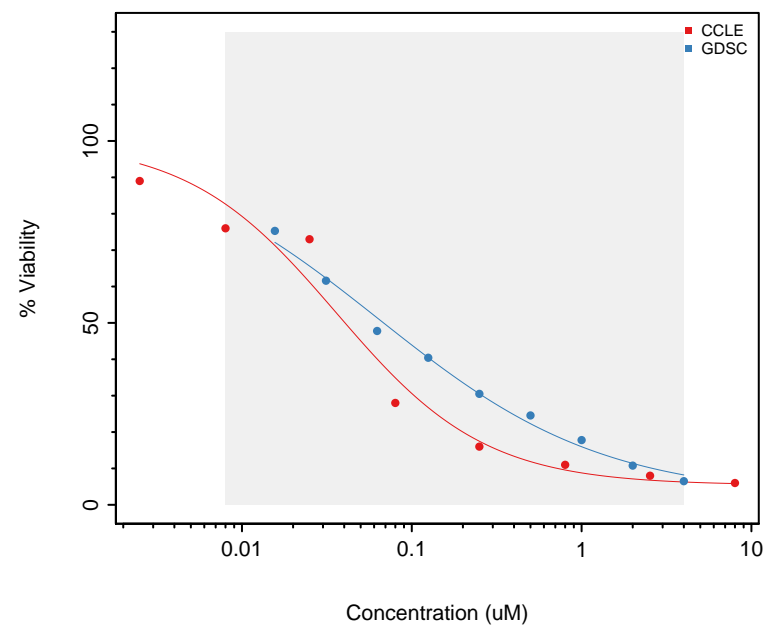

AZD6244:COLO-320-HSR

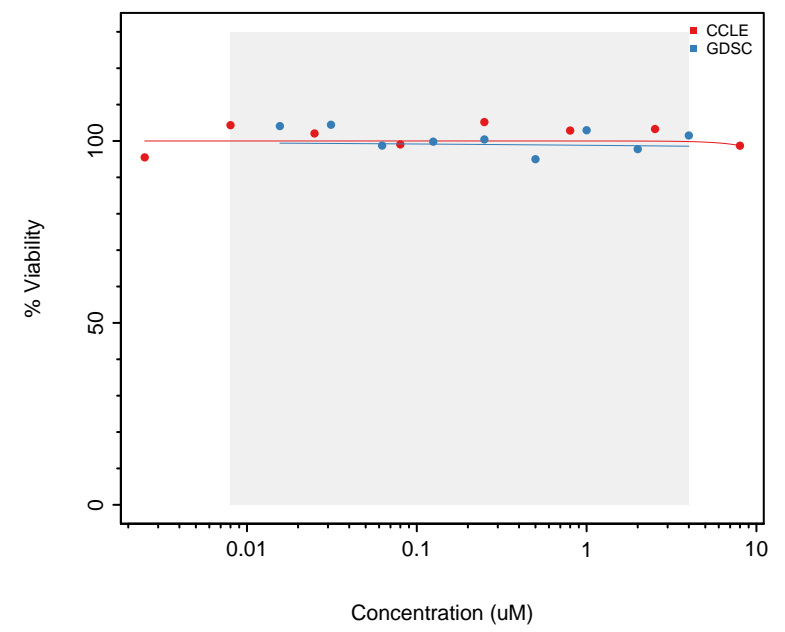

AZD6244:COLO-678

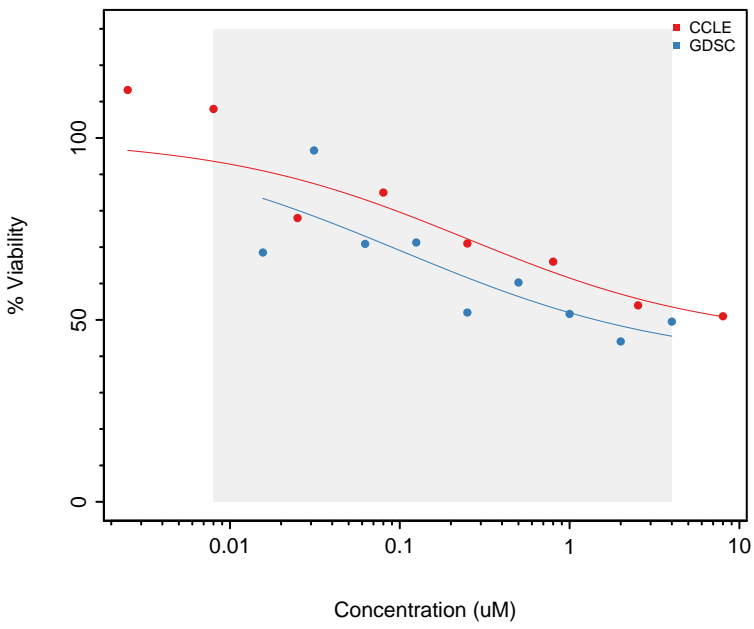

AZD6244:COLO-679

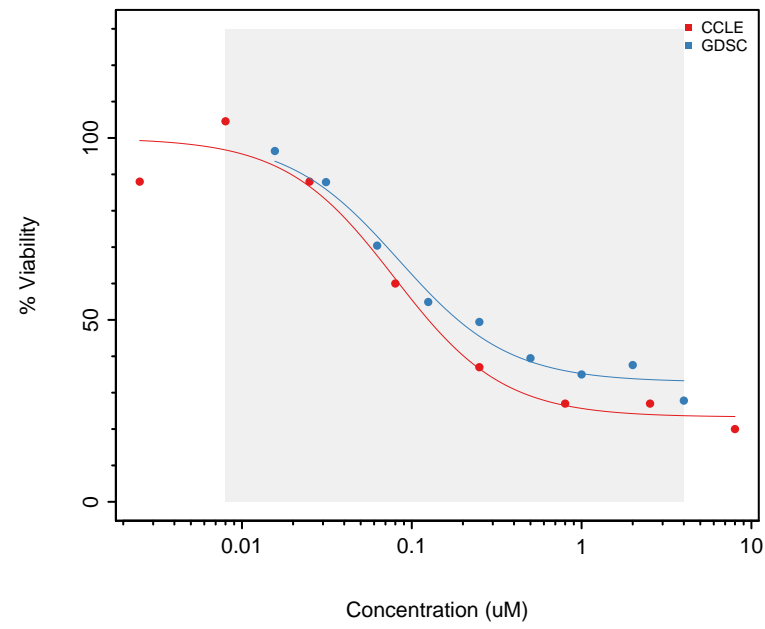

AZD6244:COLO-741

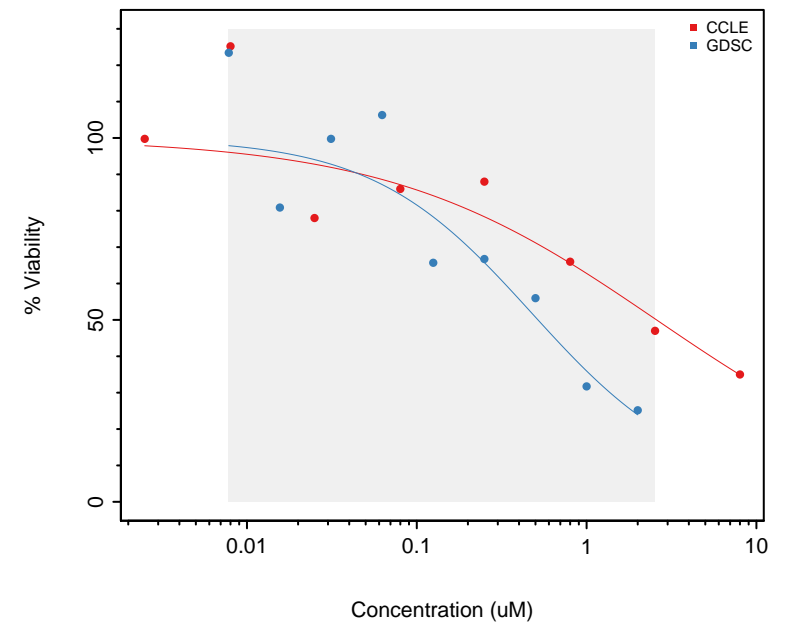

AZD6244:COR-L105

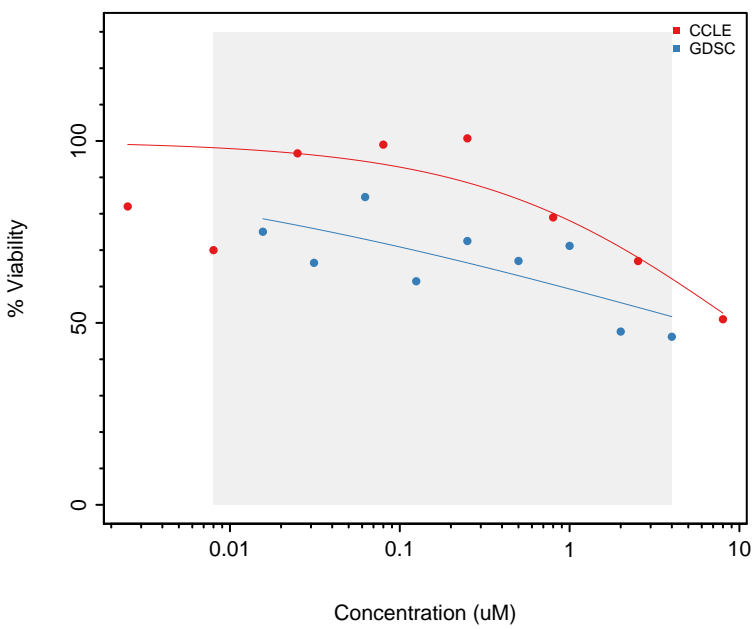

AZD6244:COR-L23

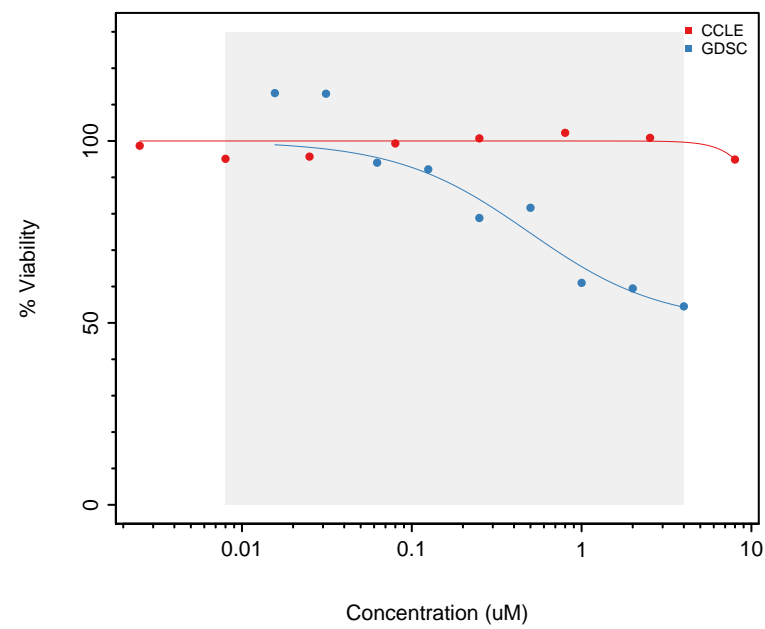

AZD6244:DBTRG-05MG

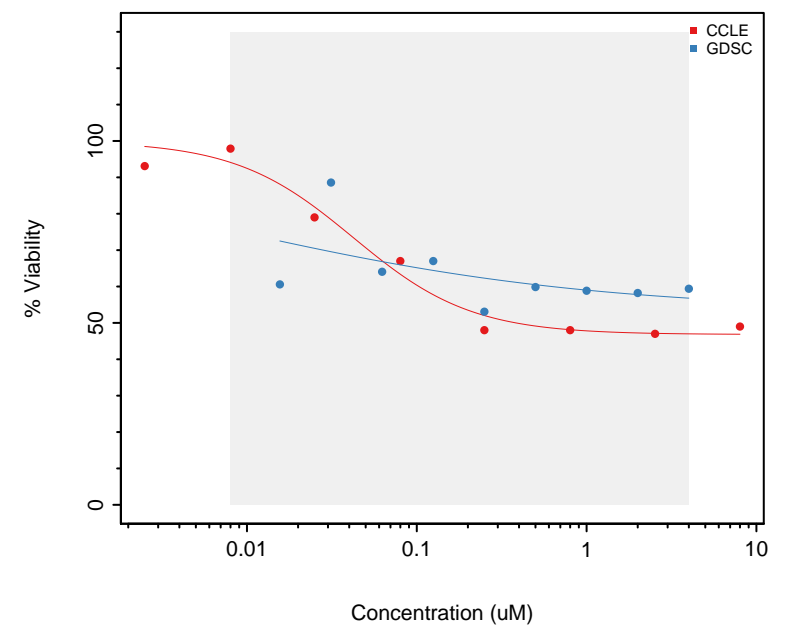

AZD6244:DEL

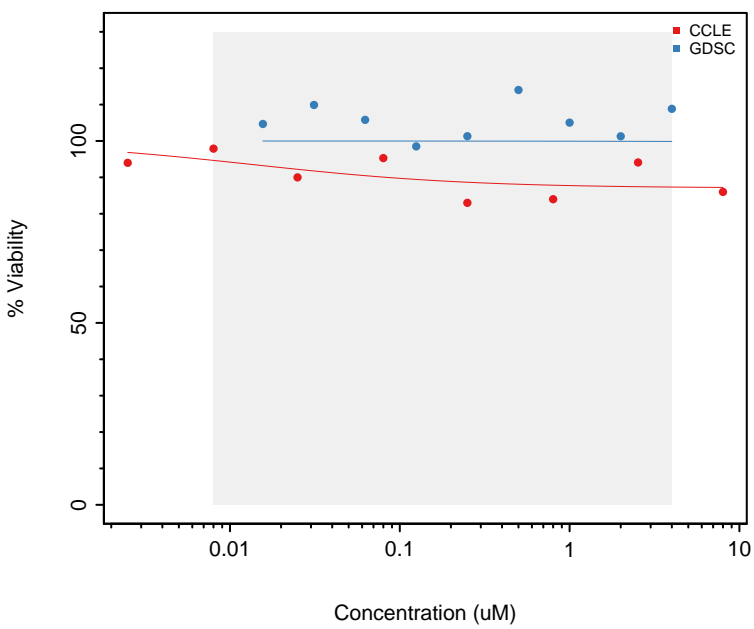

AZD6244:Detroit562

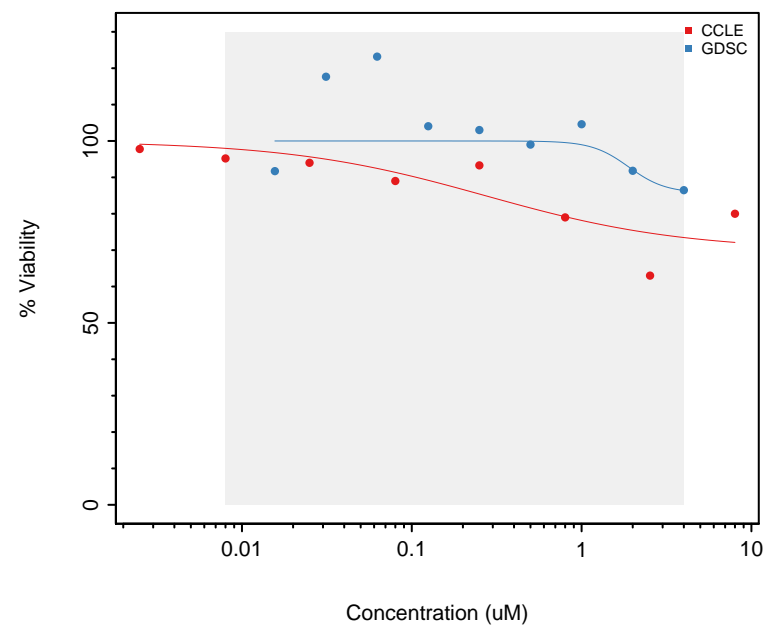

AZD6244:DK-MG

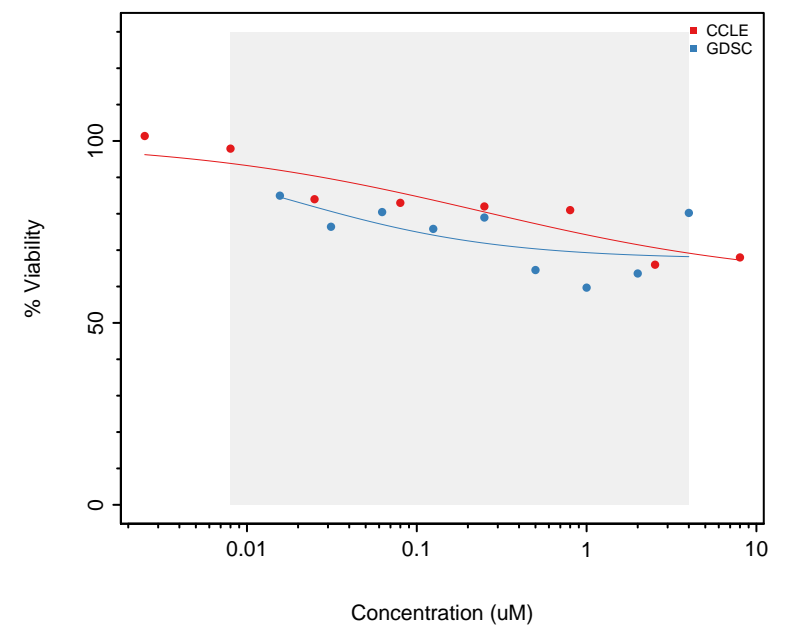

AZD6244:DMS-114

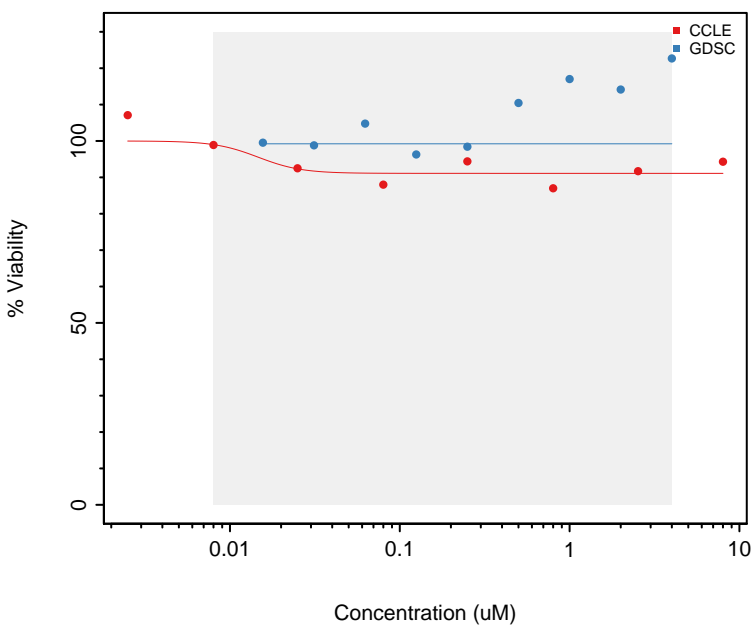

AZD6244:DOHH-2

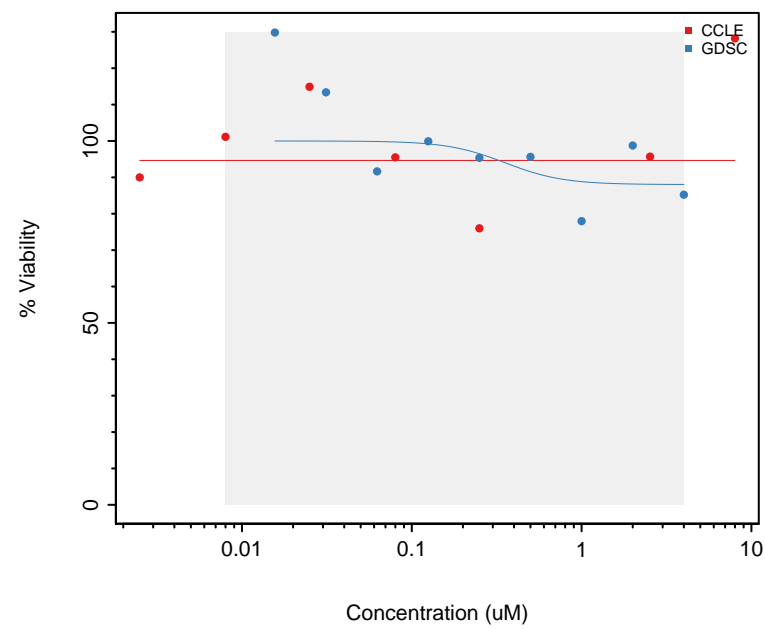

AZD6244:DU-145

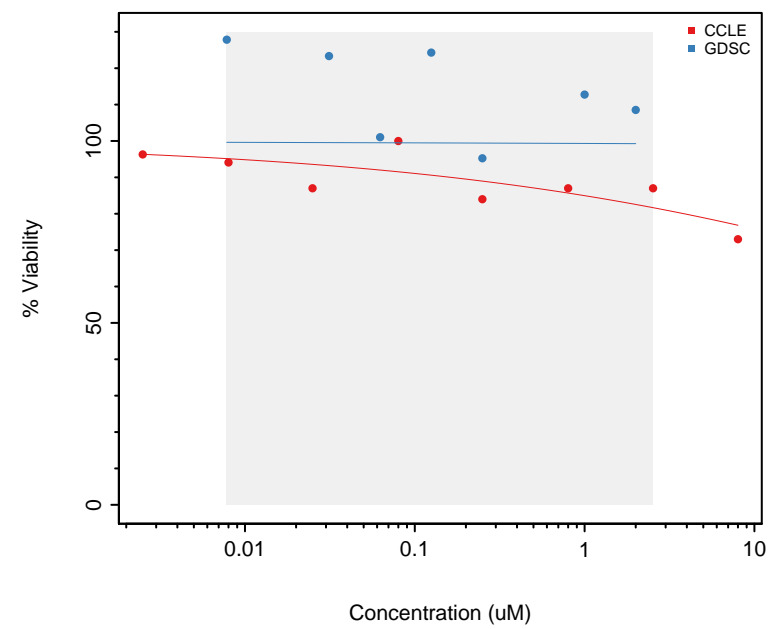

AZD6244:EB2

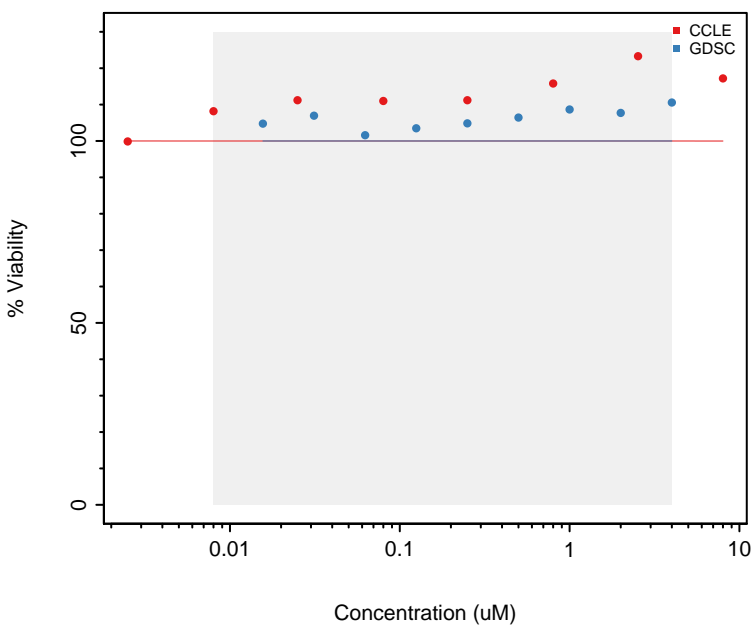

AZD6244:EFE-184

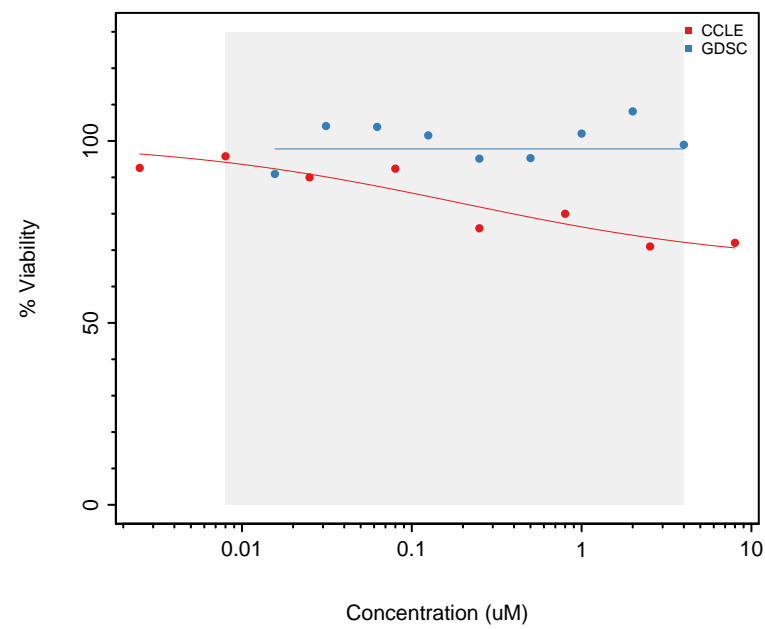

AZD6244:EFO-21

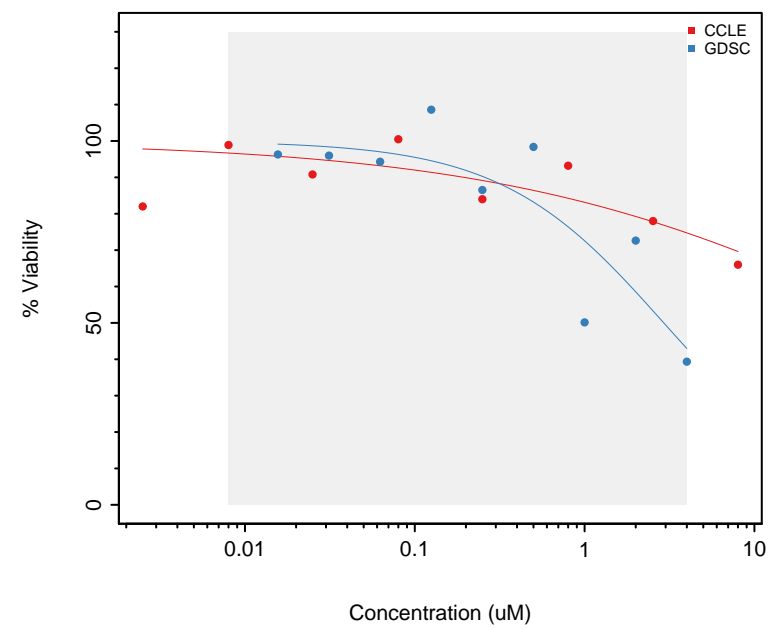

AZD6244:EFO-27

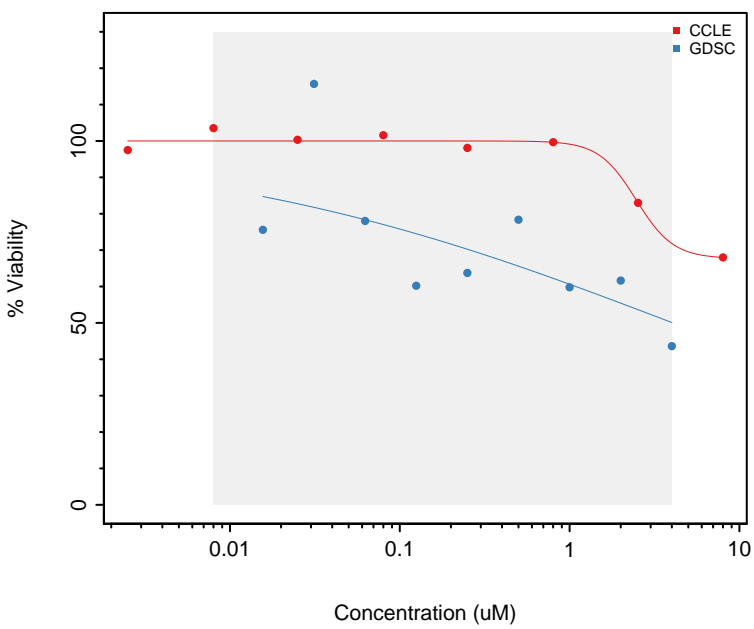

AZD6244:EM-2

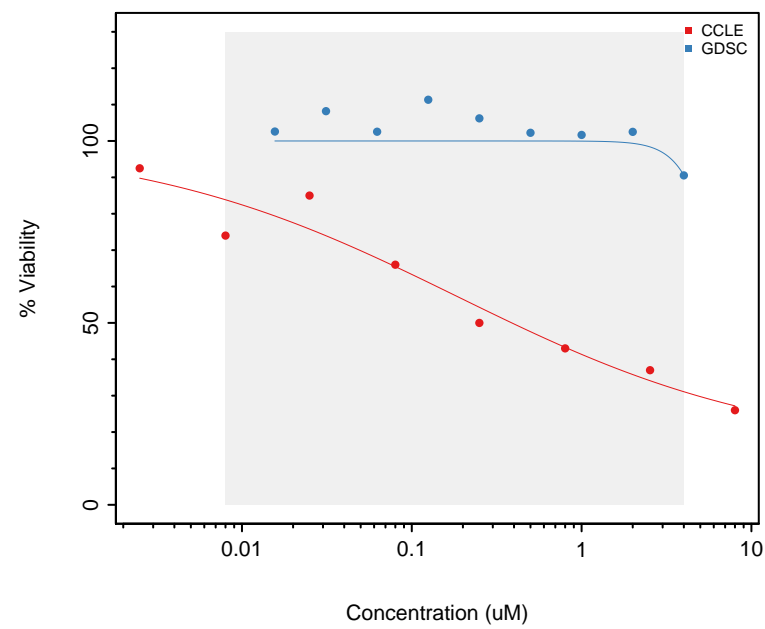

AZD6244:ESS-1

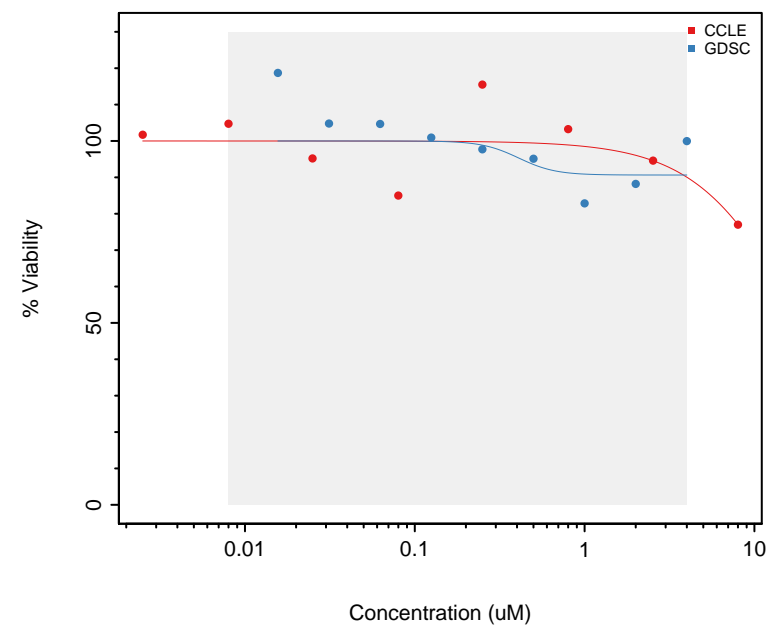

AZD6244:FADU

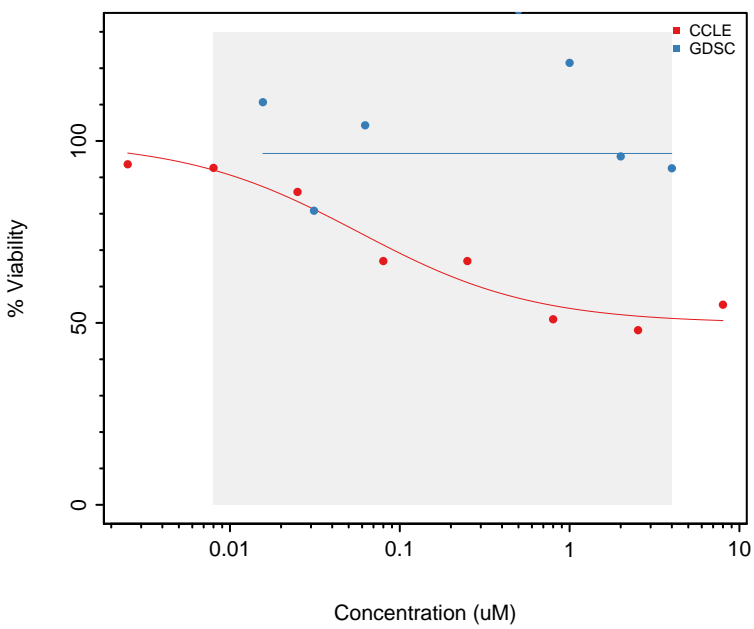

AZD6244:G-361

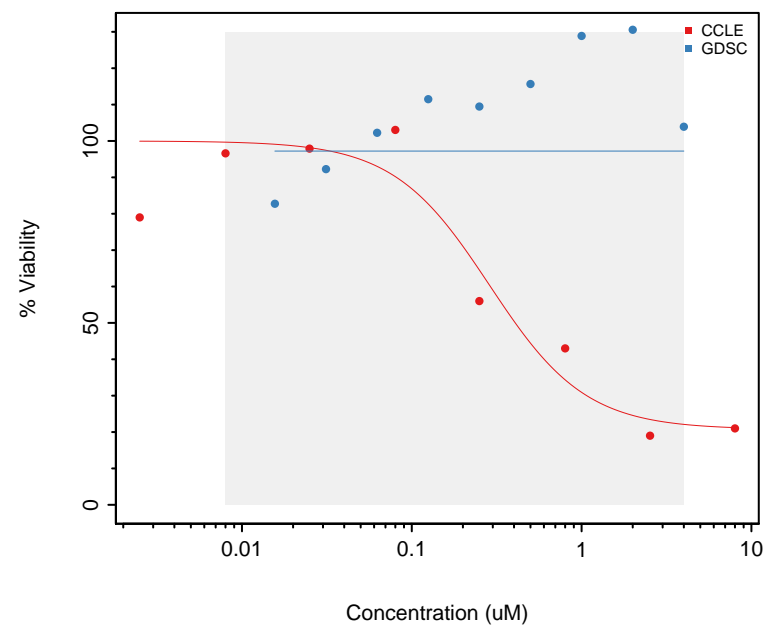

AZD6244:G-401

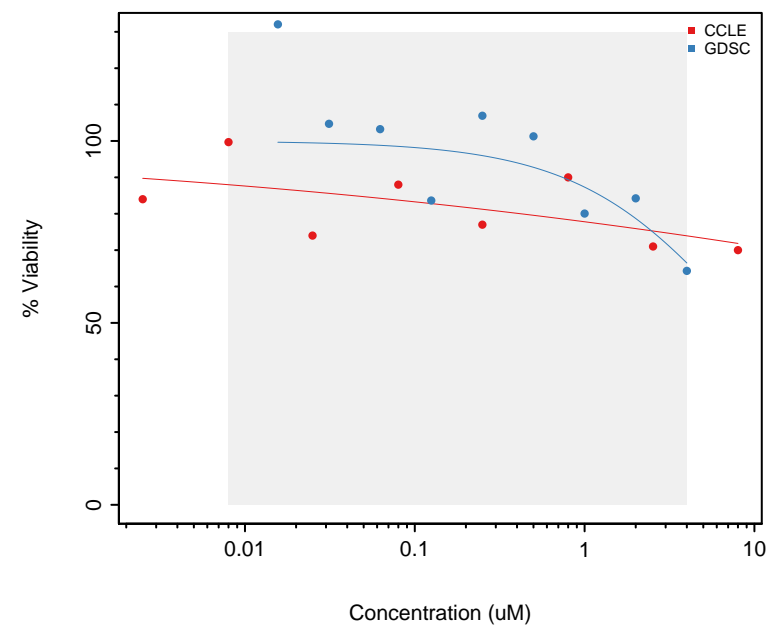

AZD6244:GAMG

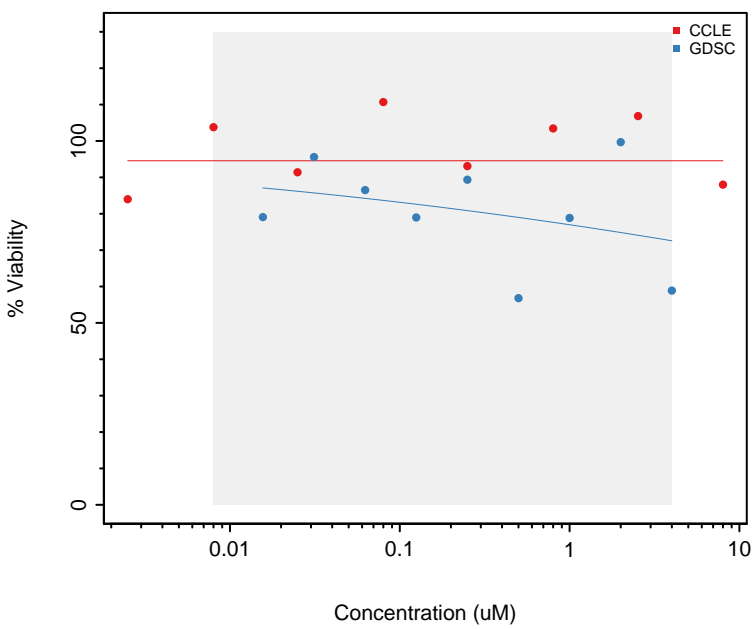

AZD6244:GB-1

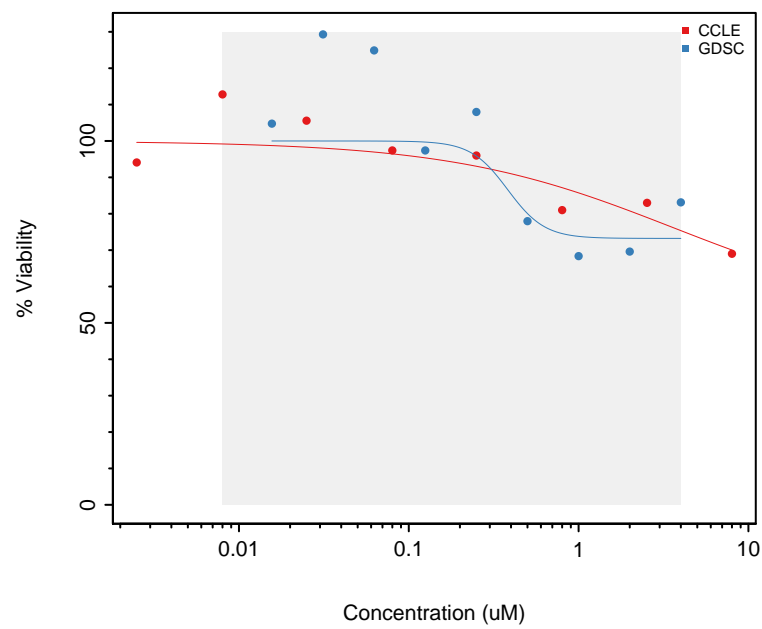

AZD6244:GCIY

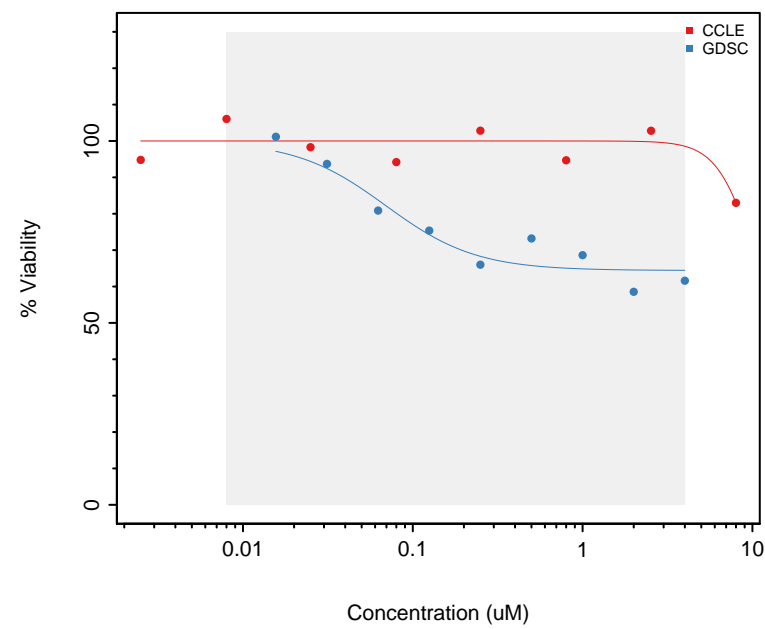

AZD6244:GCT

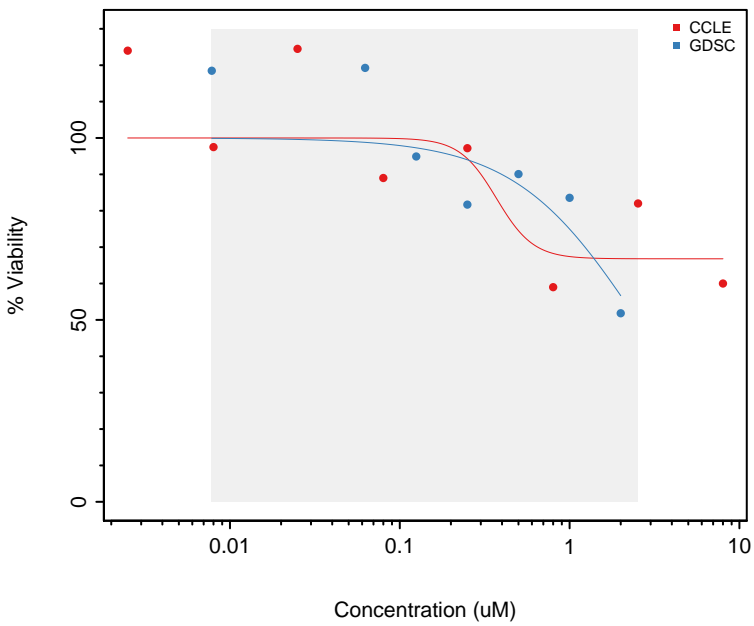

AZD6244:GI-1

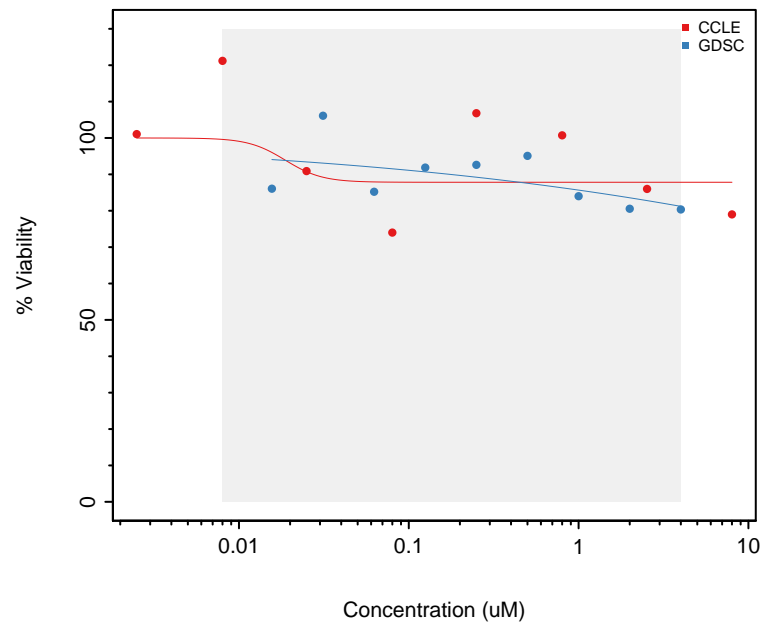

AZD6244:GMS-10

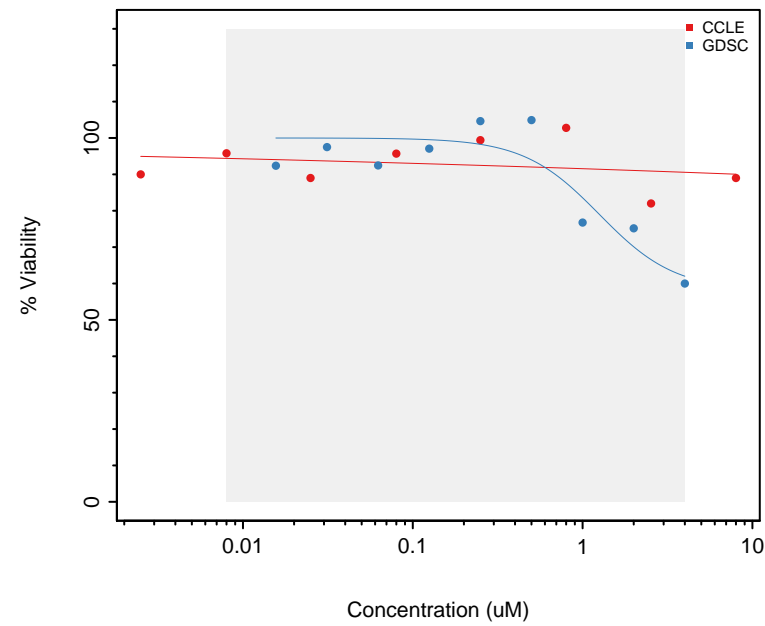

AZD6244:H4

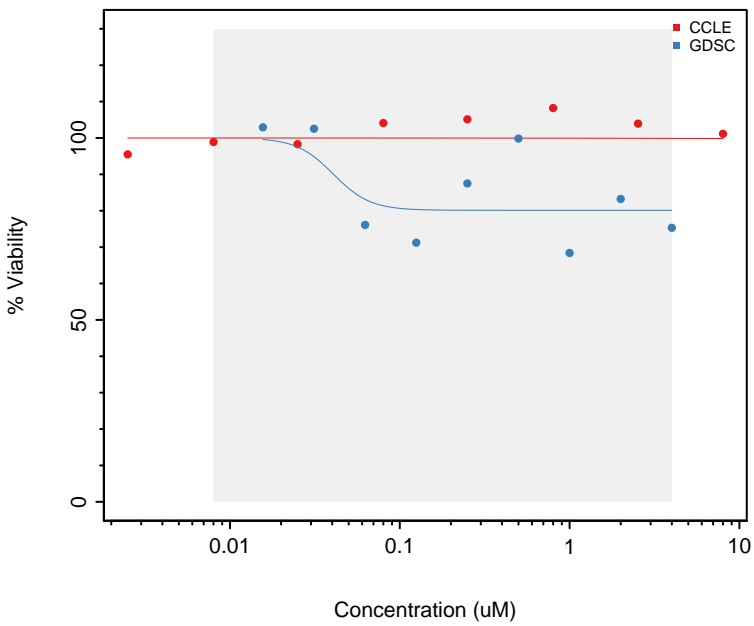

AZD6244:HCC1187

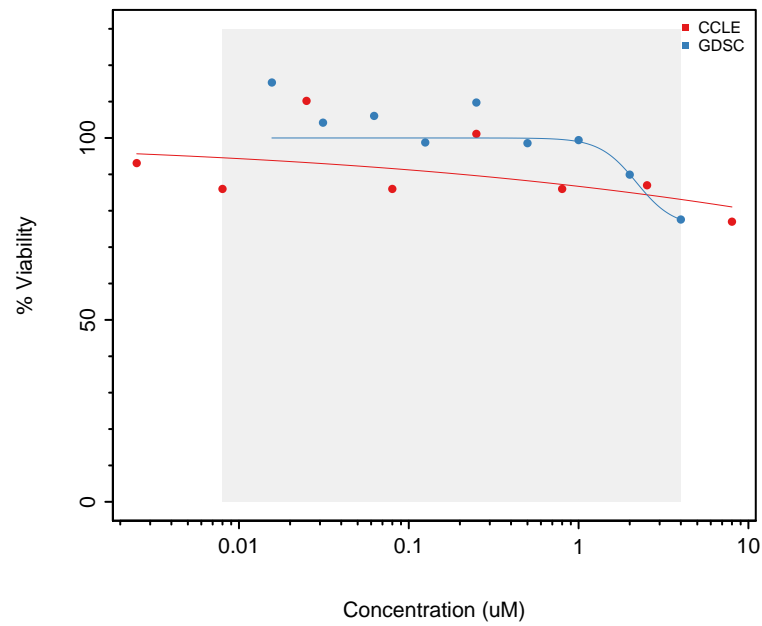

AZD6244:HCC1395

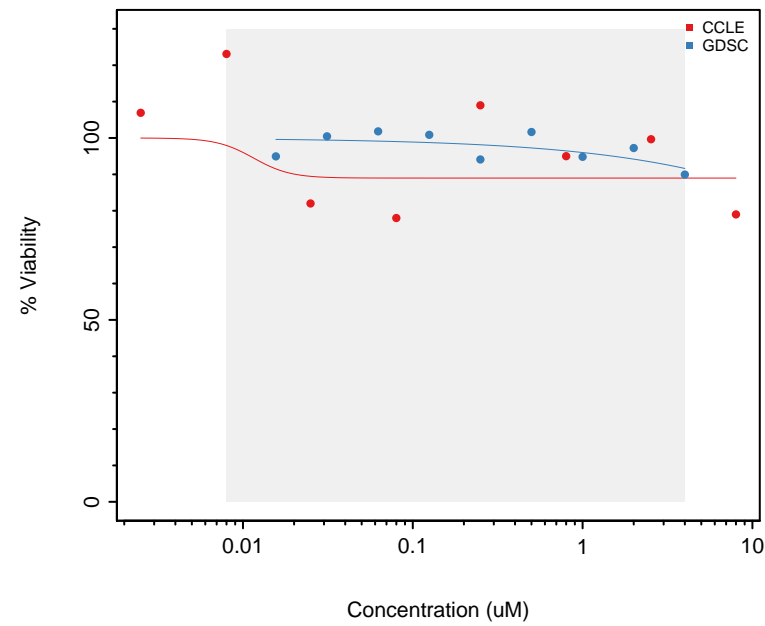

AZD6244:HCC1569

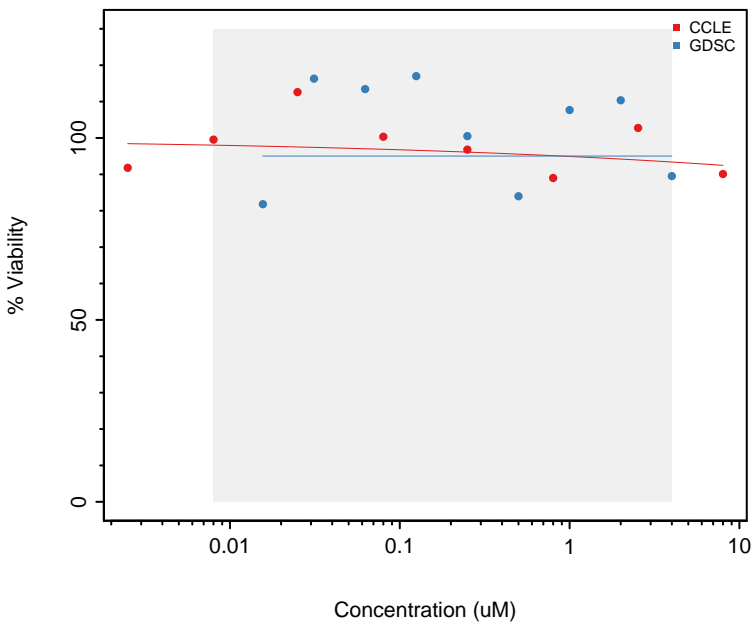

AZD6244:HCC1954

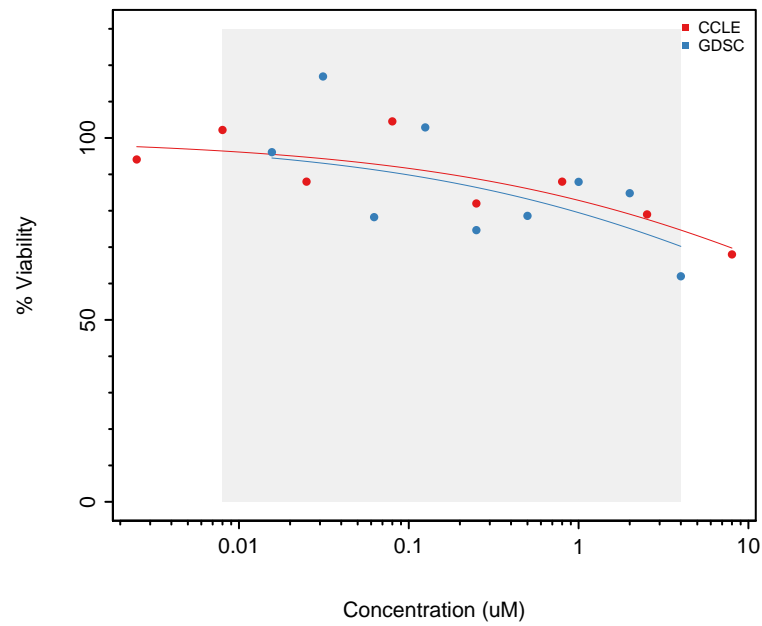

AZD6244:HCT-116

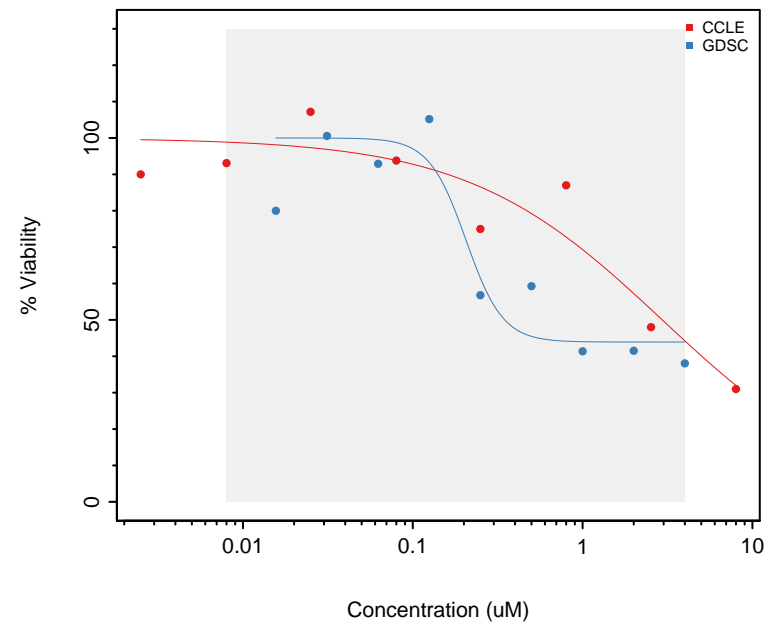



AZD6244:HT-29

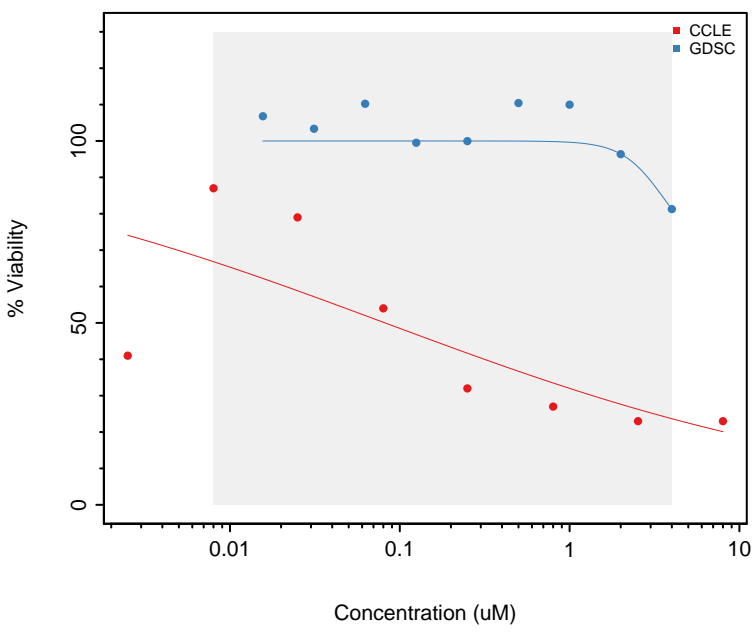

AZD6244:HuCCT1

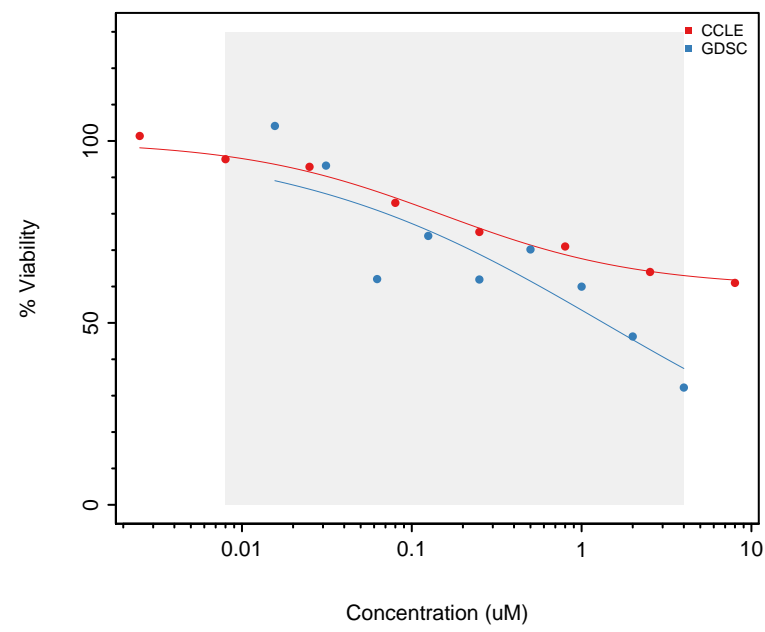

AZD6244:HuP-T3

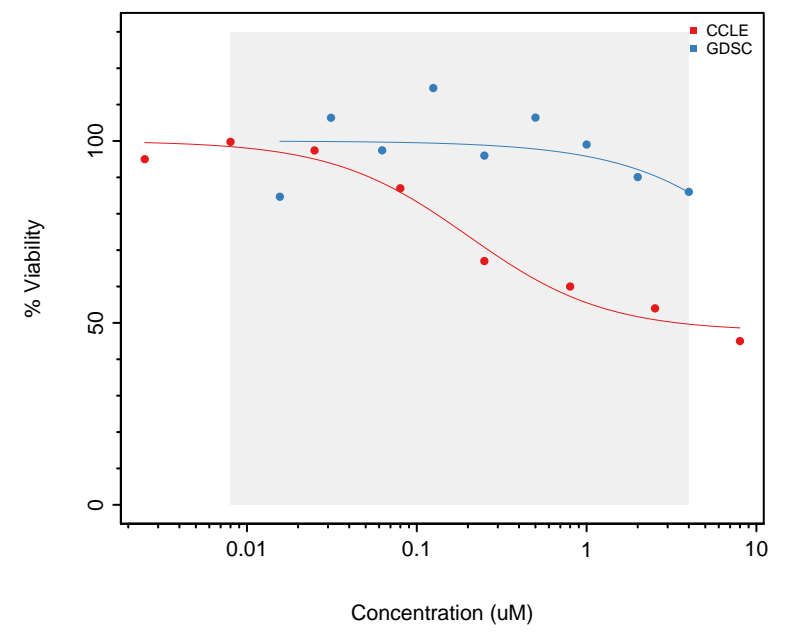

AZD6244:HuP-T4

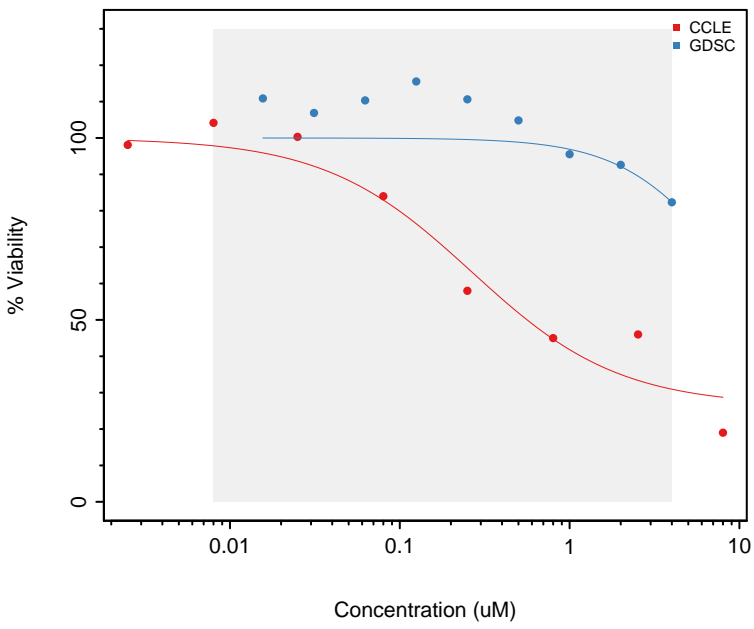

AZD6244:IA-LM

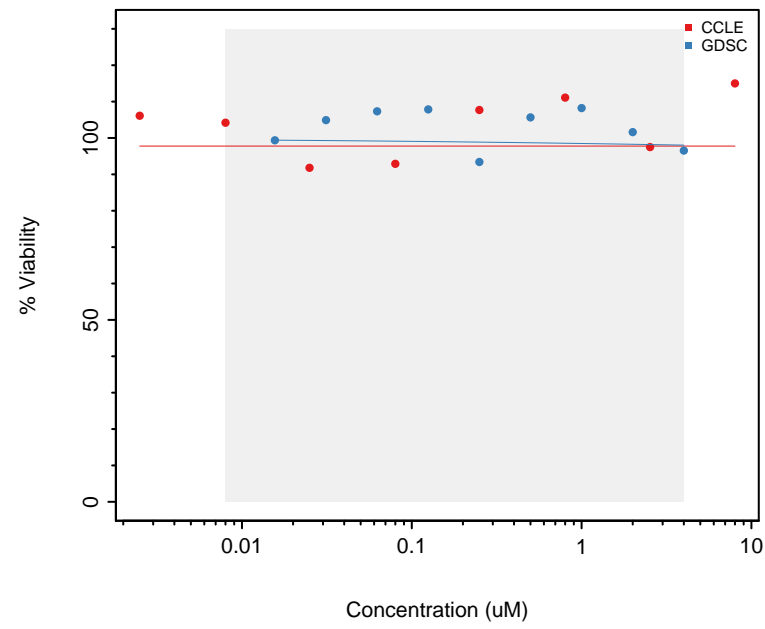

AZD6244:IGROV-1

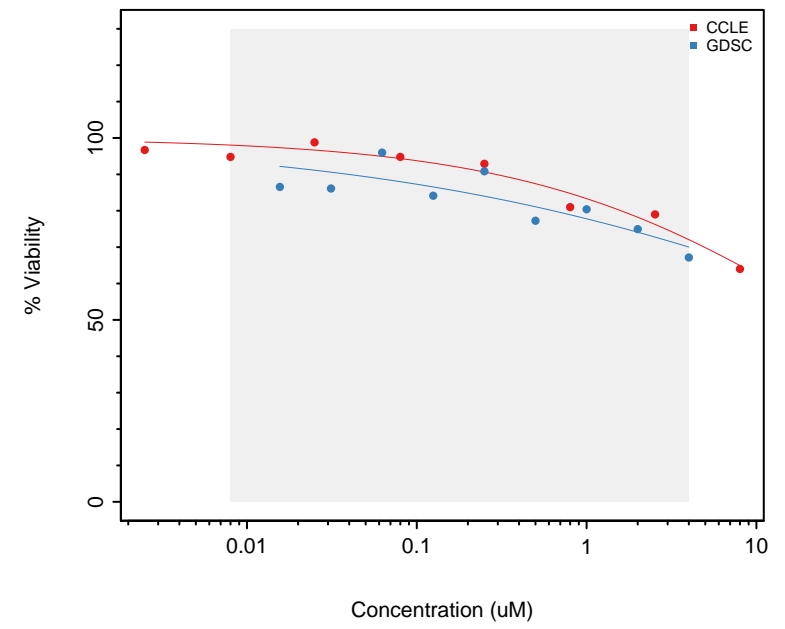

AZD6244:IPC-298

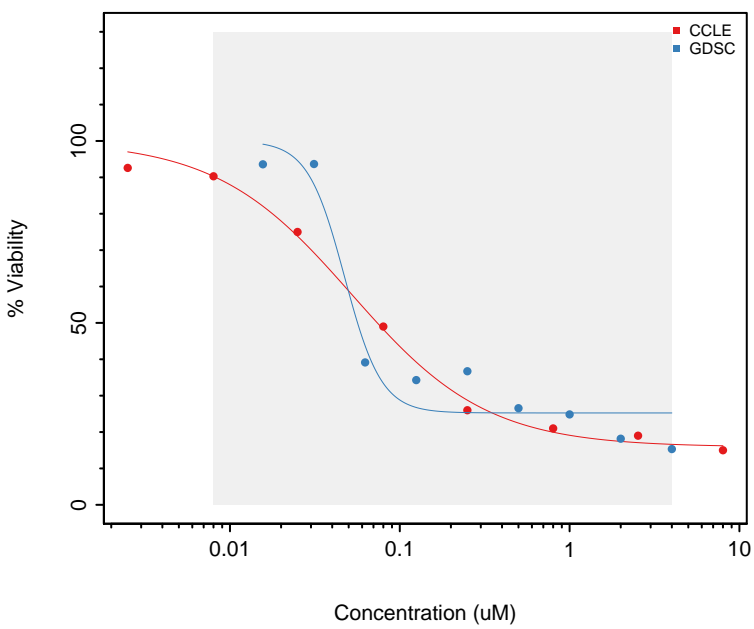

AZD6244:IST-MES1

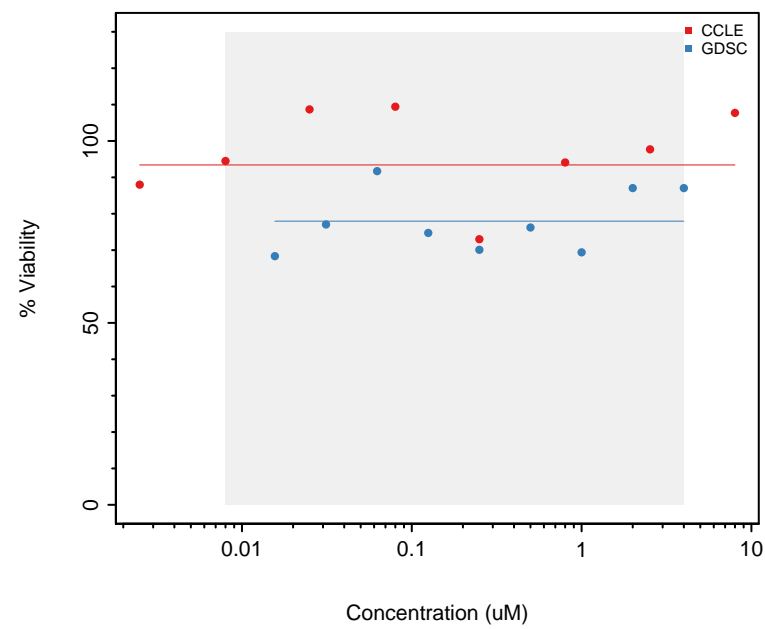

AZD6244:JVM-3

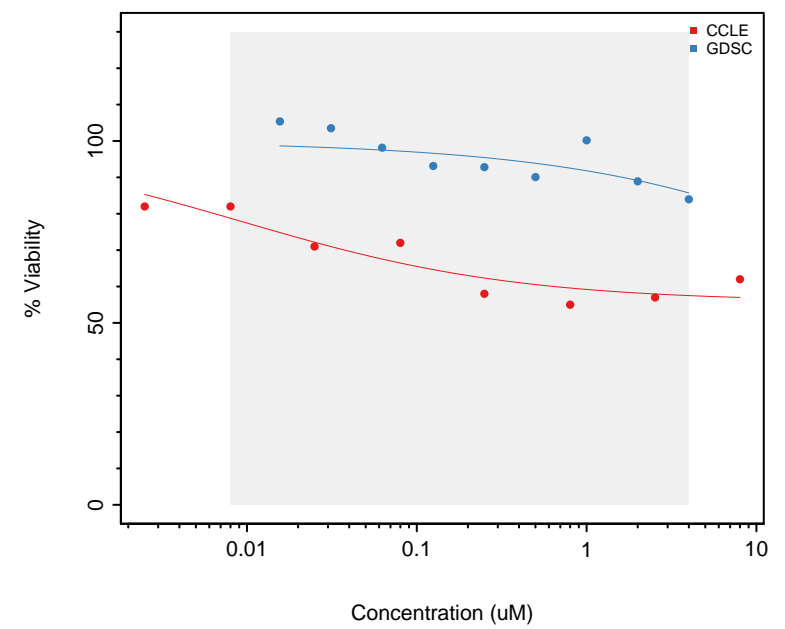

AZD6244:KARPAS-299

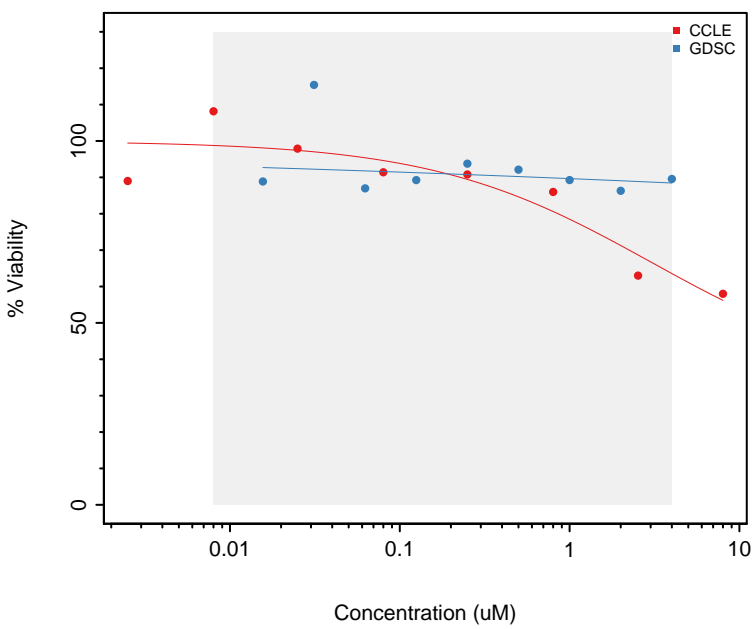

AZD6244:KARPAS-422

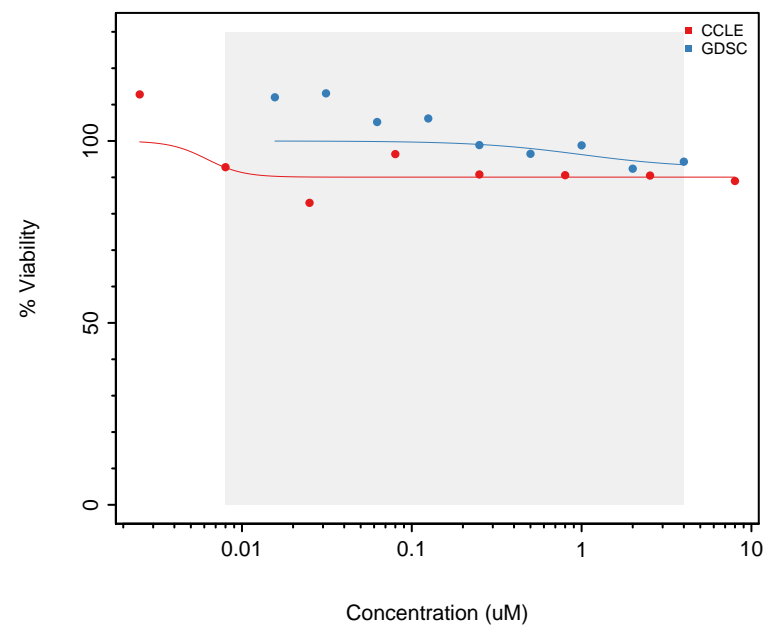

AZD6244:KG-1

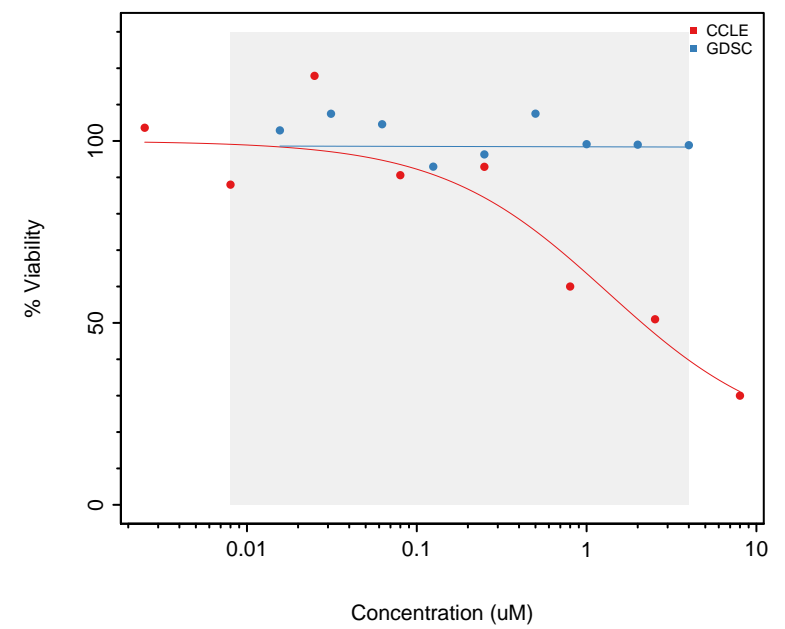



AZD6244:KLE

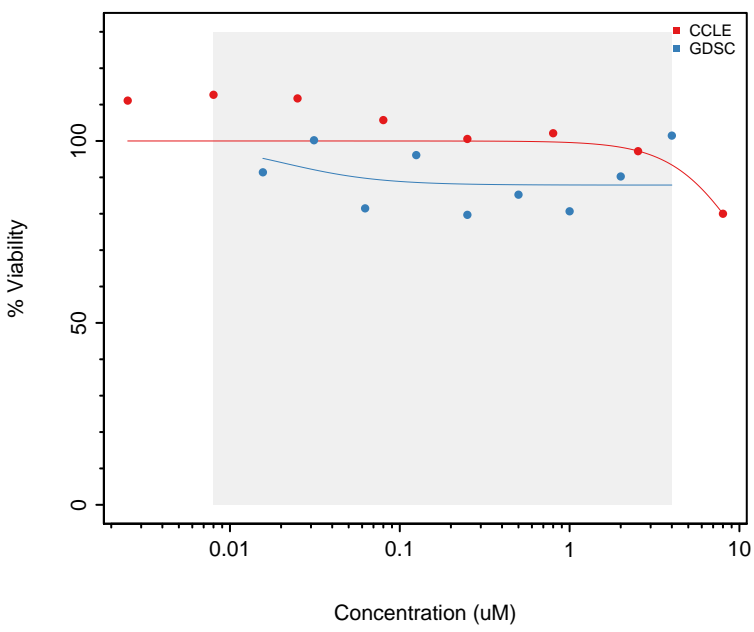

AZD6244:KNS-42

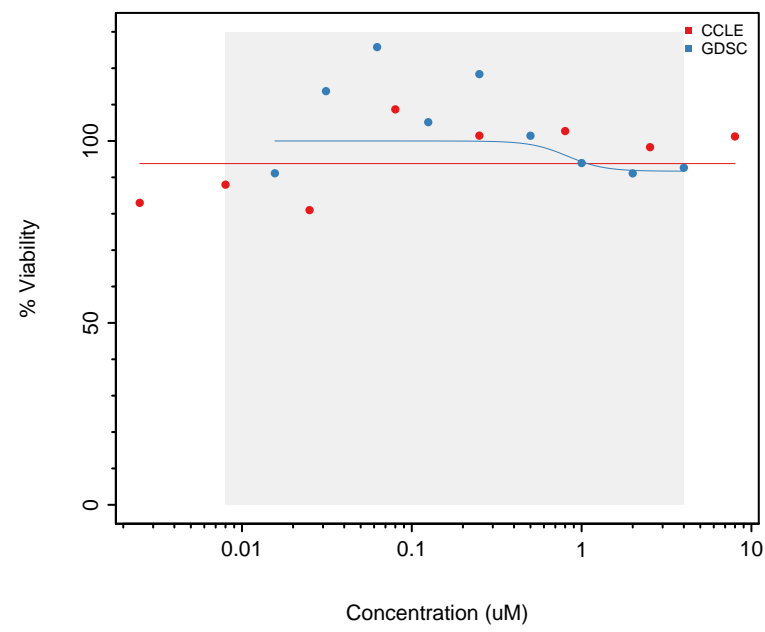

AZD6244:KNS-62

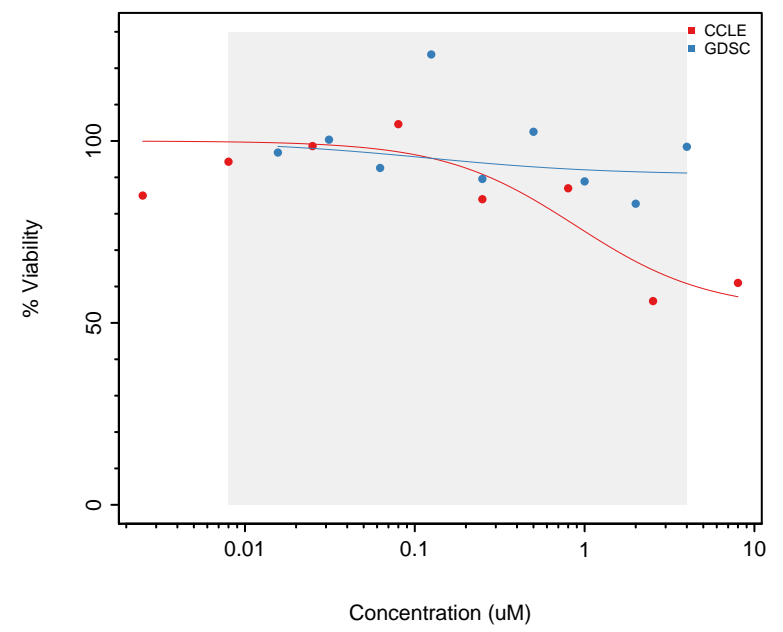

AZD6244:KNS-81-FD

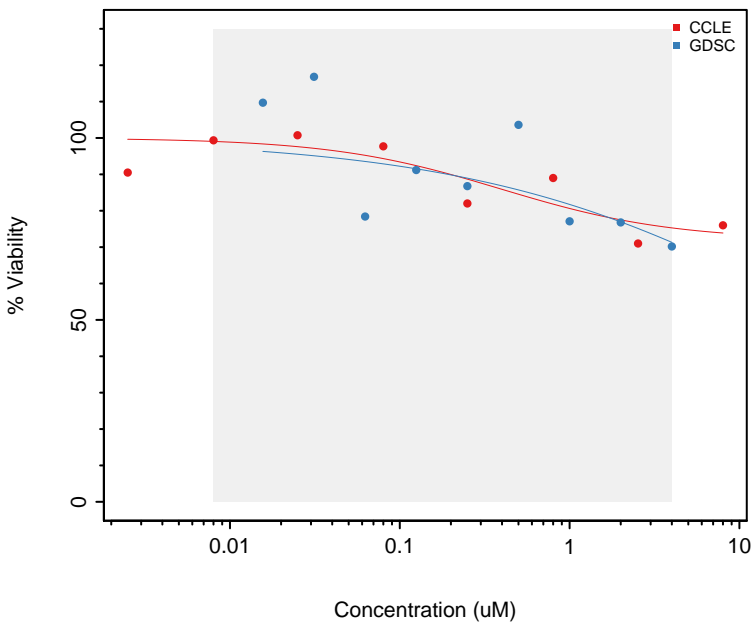

AZD6244:KU812

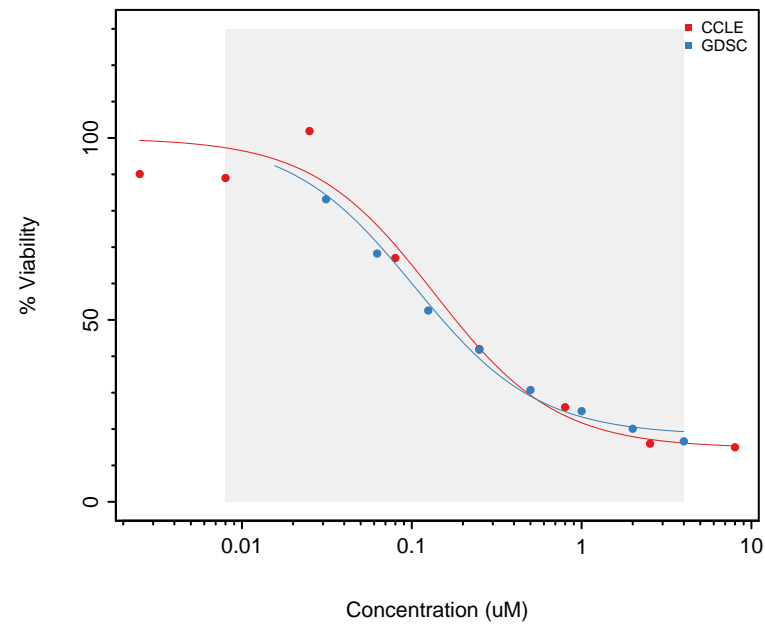

AZD6244:KURAMOCHI

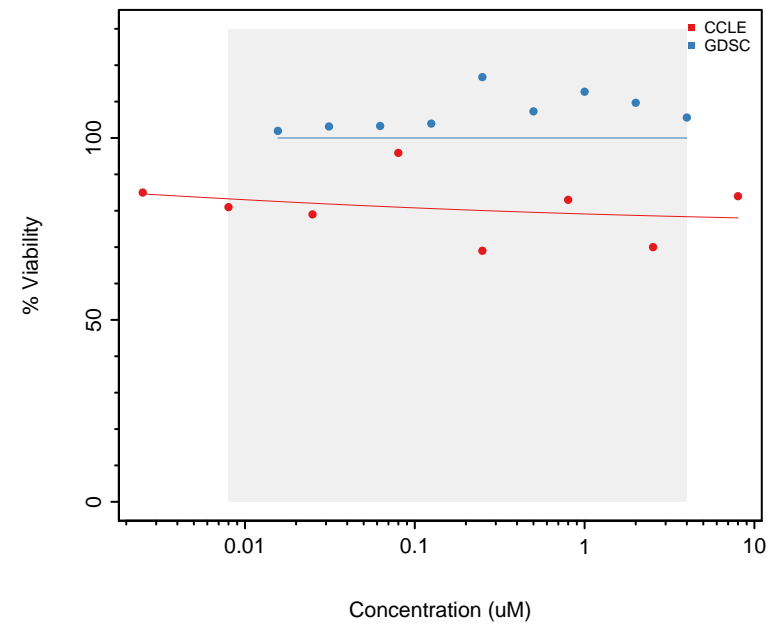

AZD6244:KYSE-140

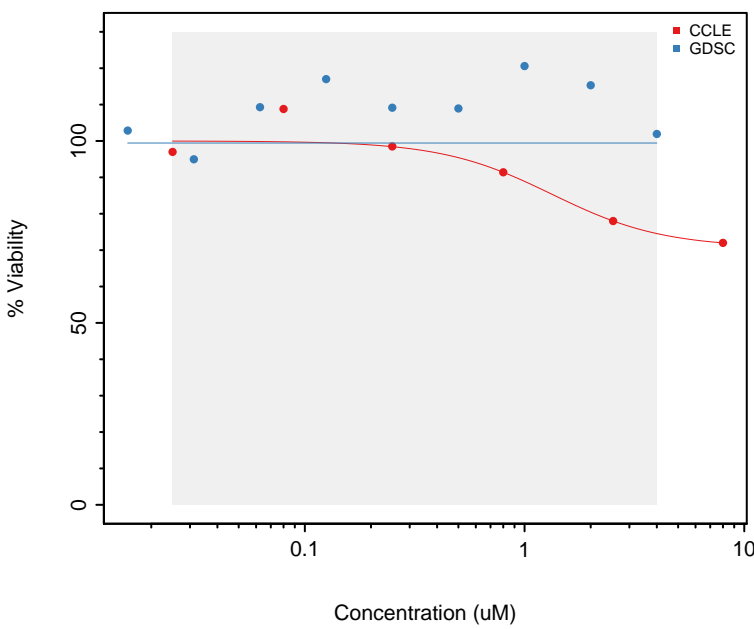

AZD6244:KYSE-150

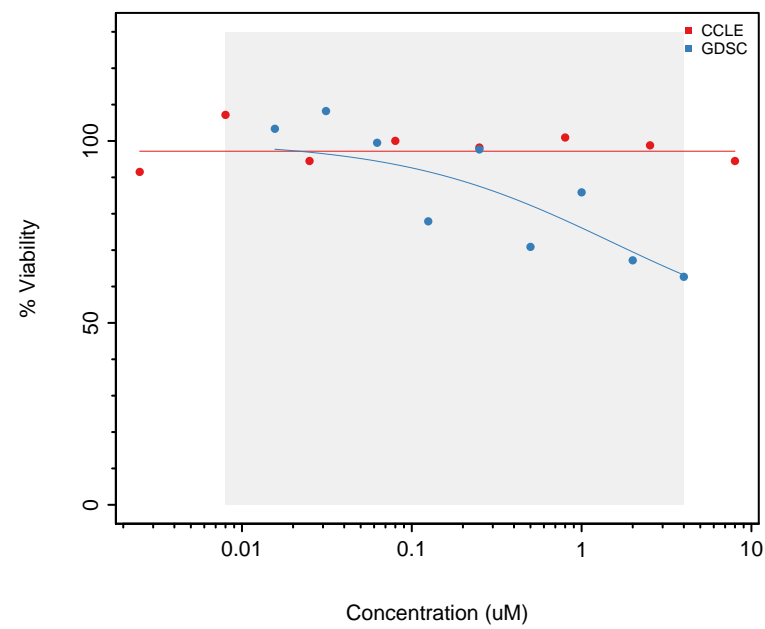

AZD6244:KYSE-180

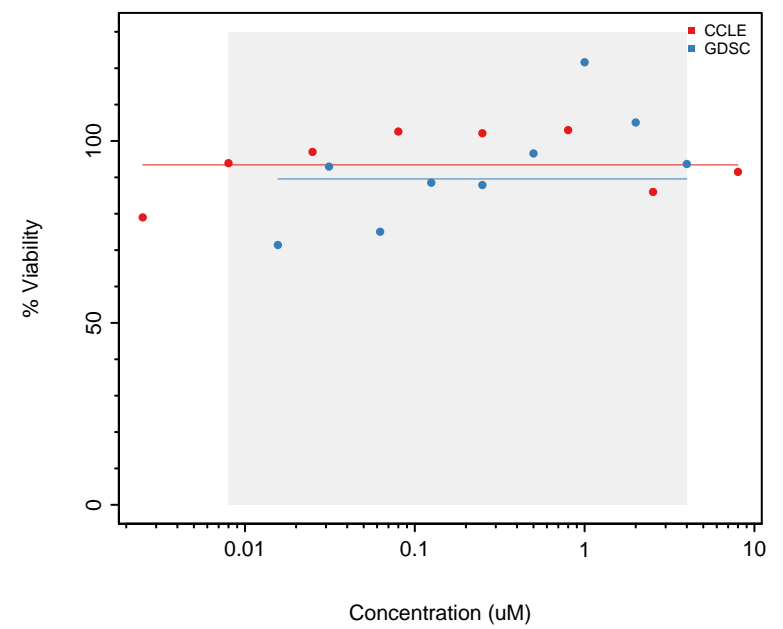

AZD6244:KYSE-410

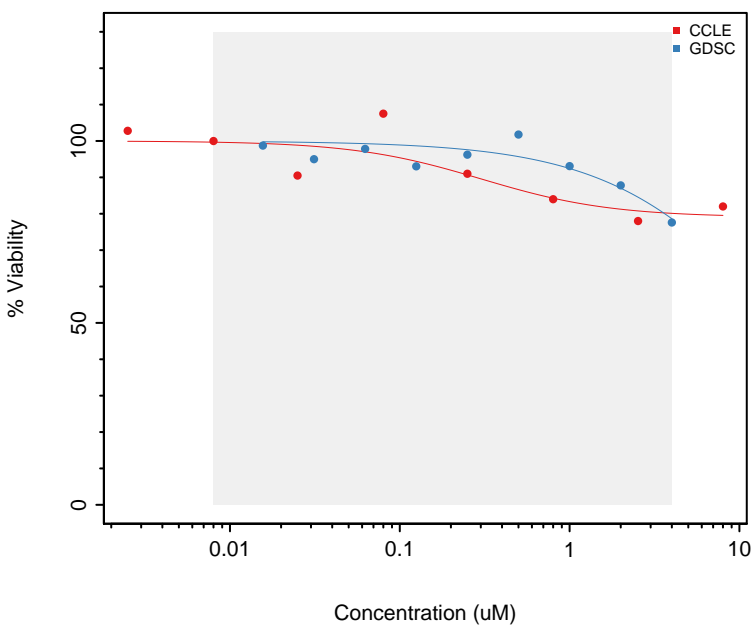

AZD6244:KYSE-450

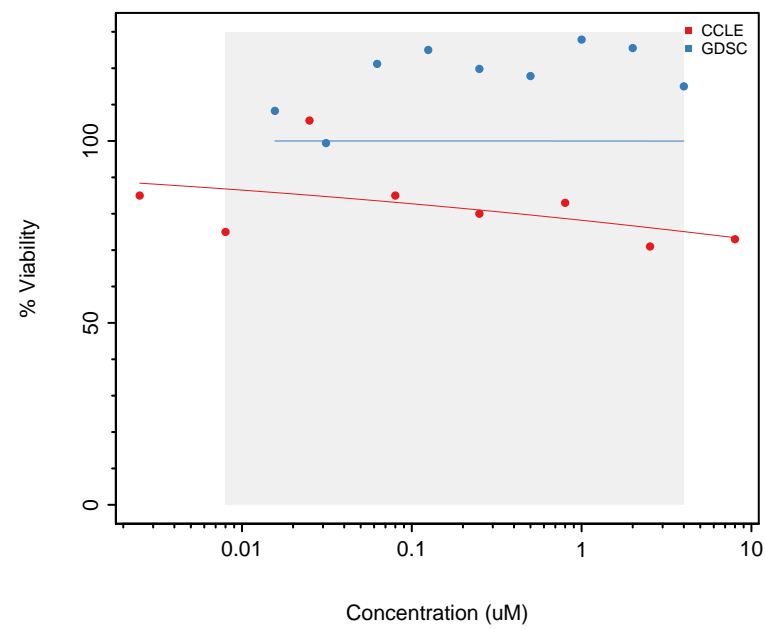

AZD6244:KYSE-520

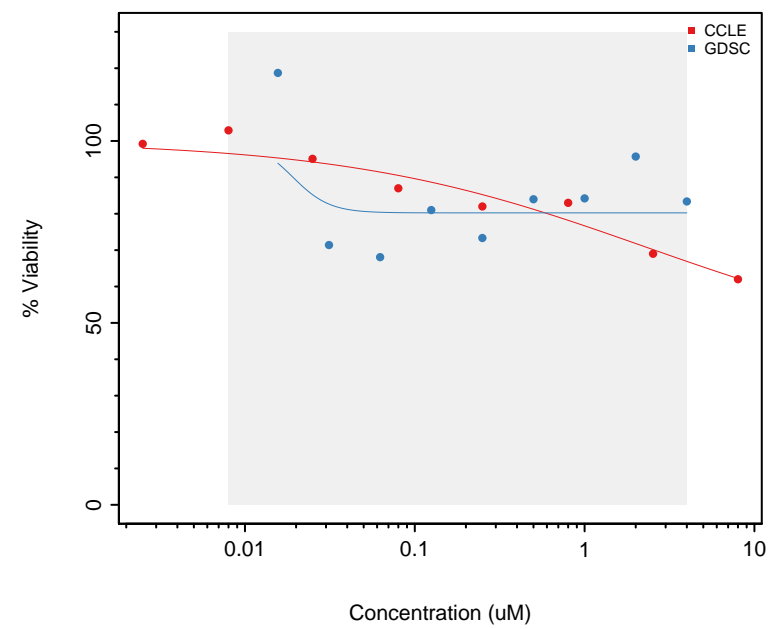

AZD6244:KYSE-70

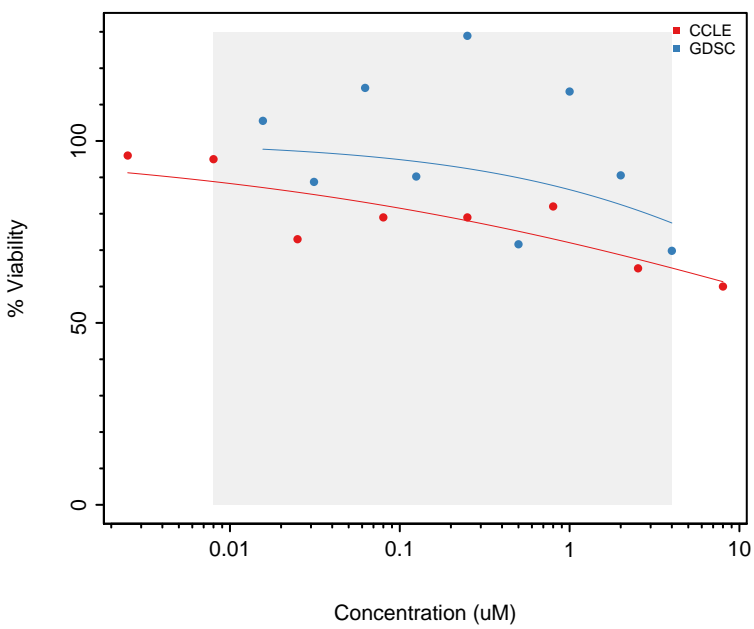

AZD6244:L-363

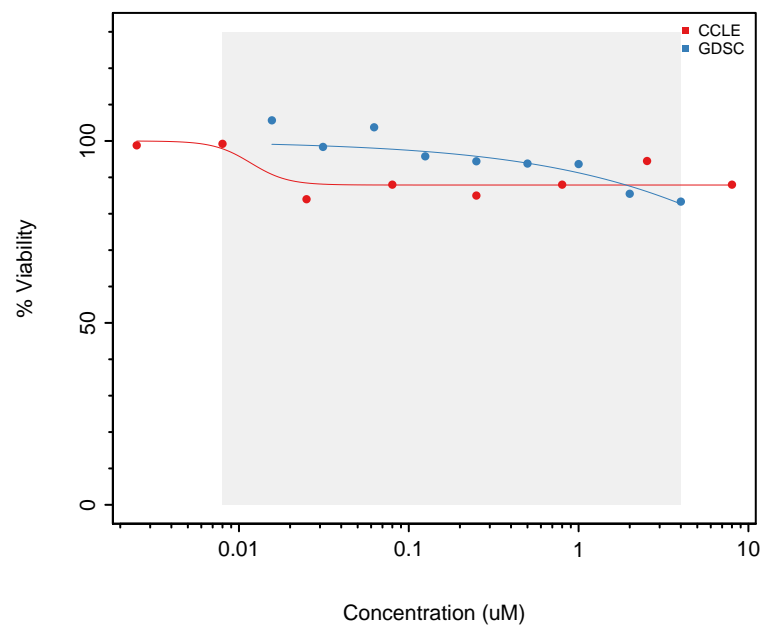

AZD6244:L-428

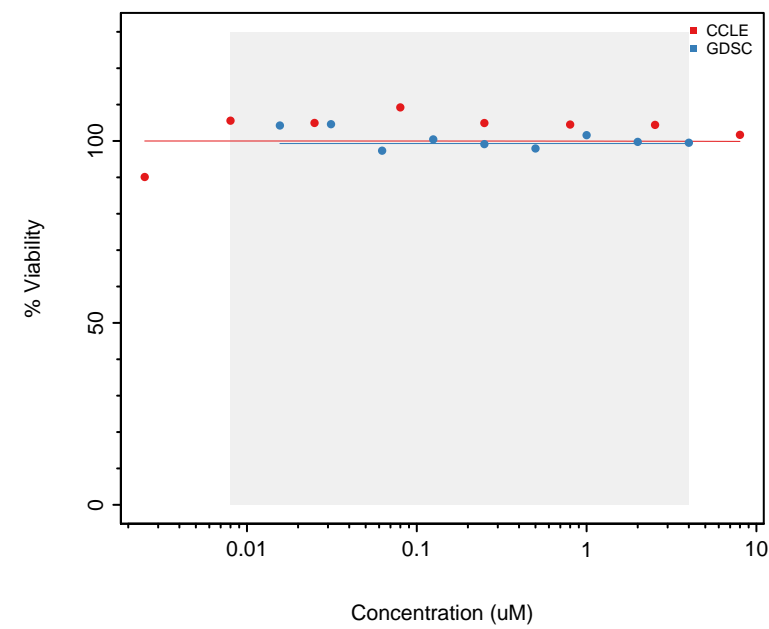

AZD6244:LCLC-103H

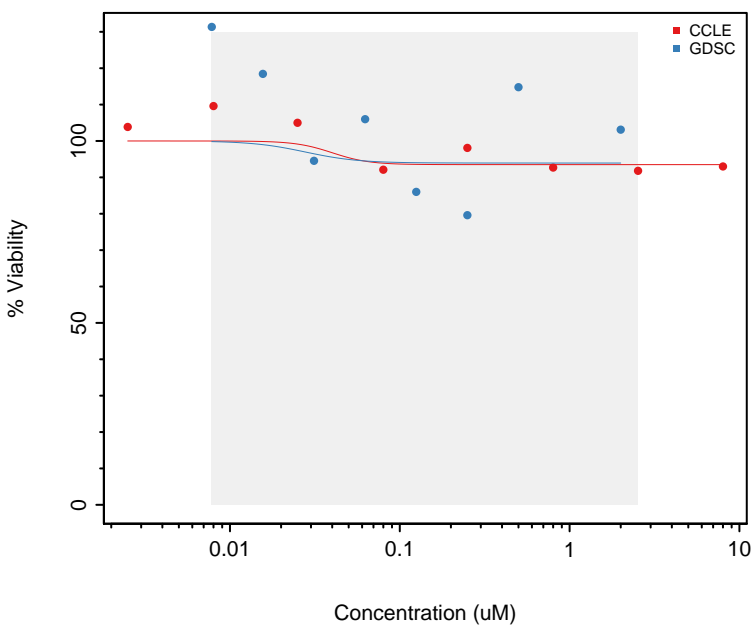

AZD6244:LOXIMVI

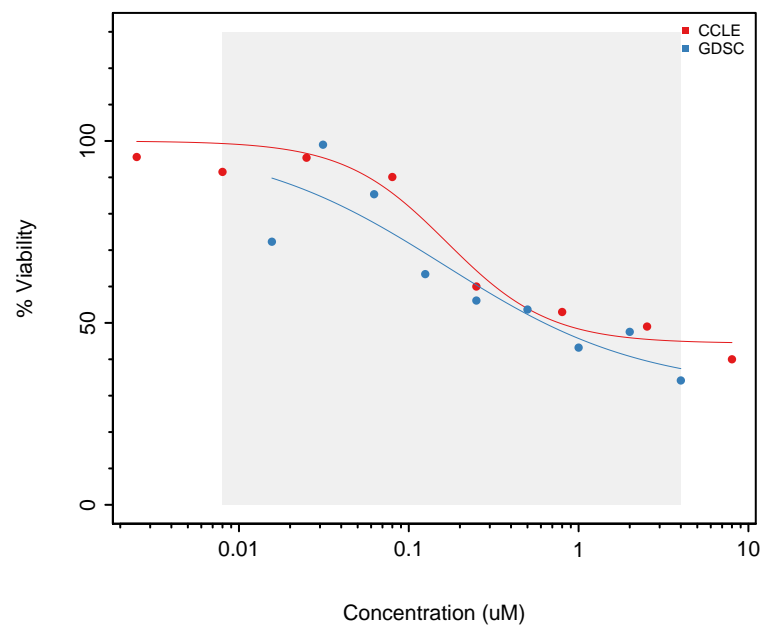

AZD6244:LP-1

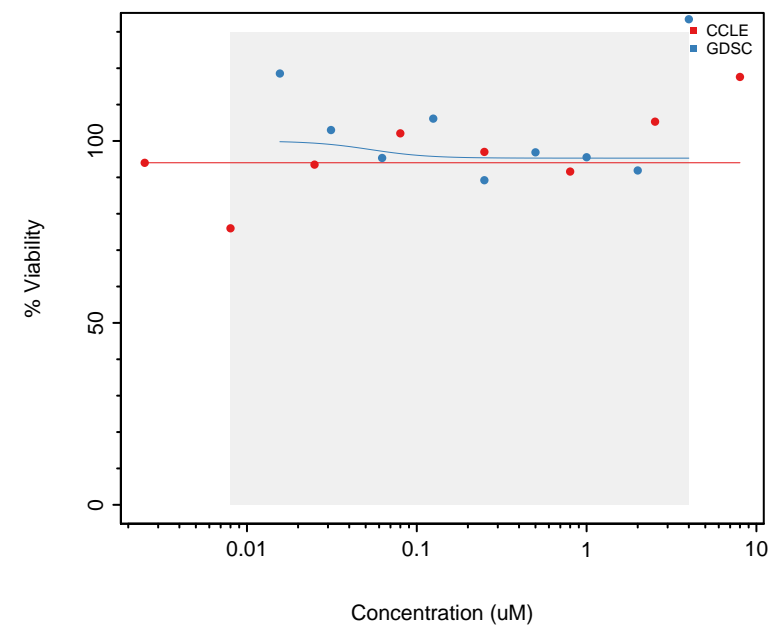

AZD6244:LS-123

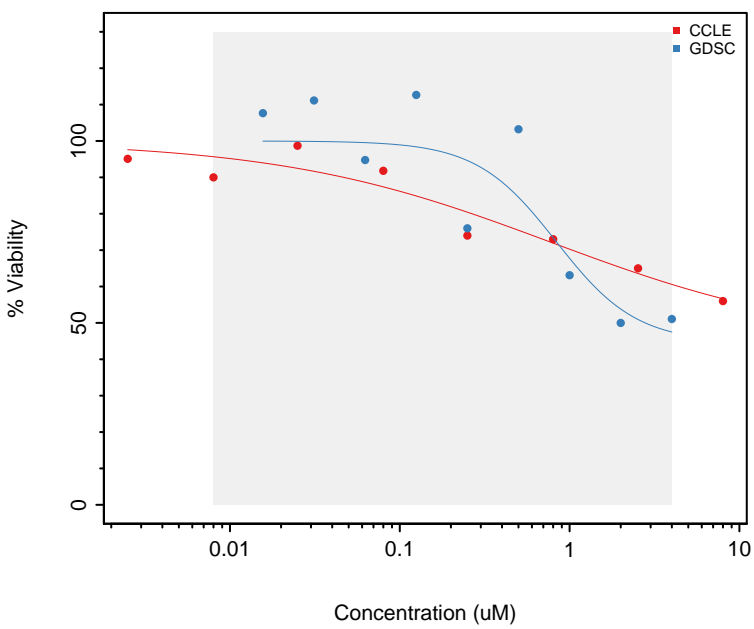

AZD6244:LS-411N

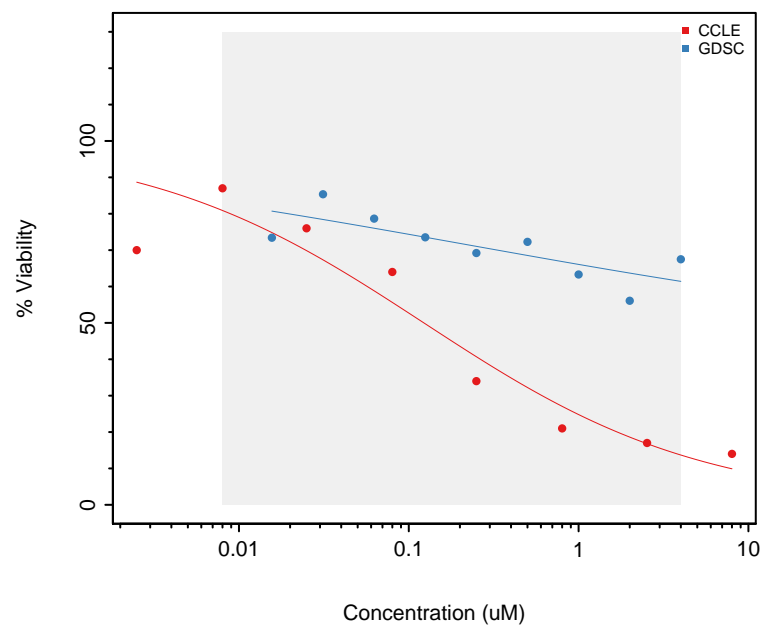

AZD6244:LS-513

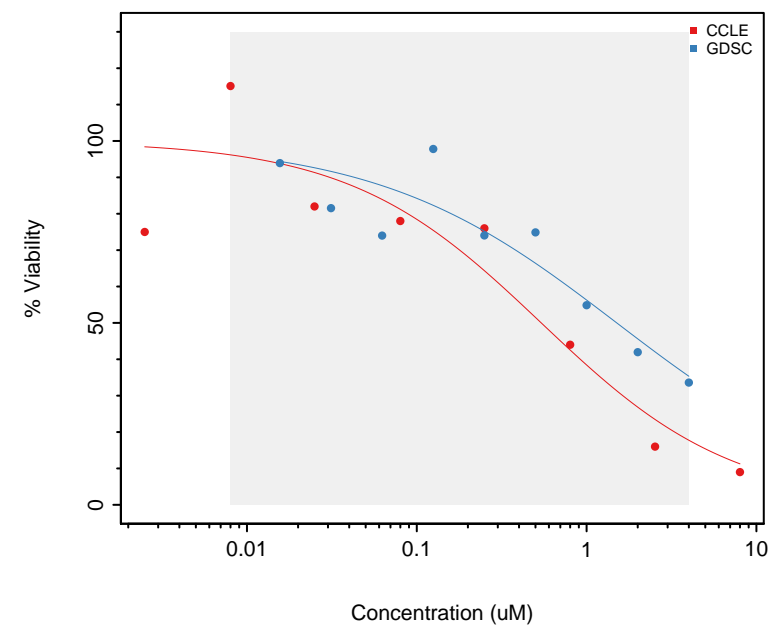

AZD6244:LU-99A

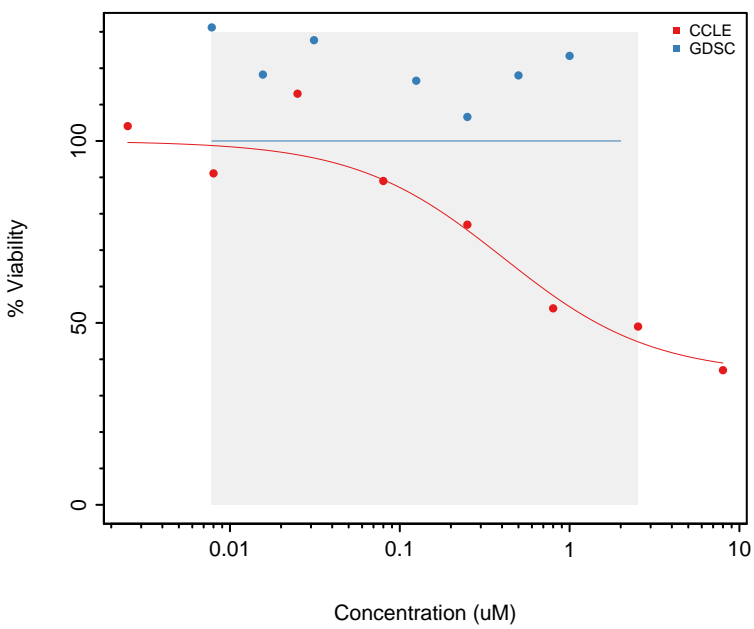

AZD6244:M059J

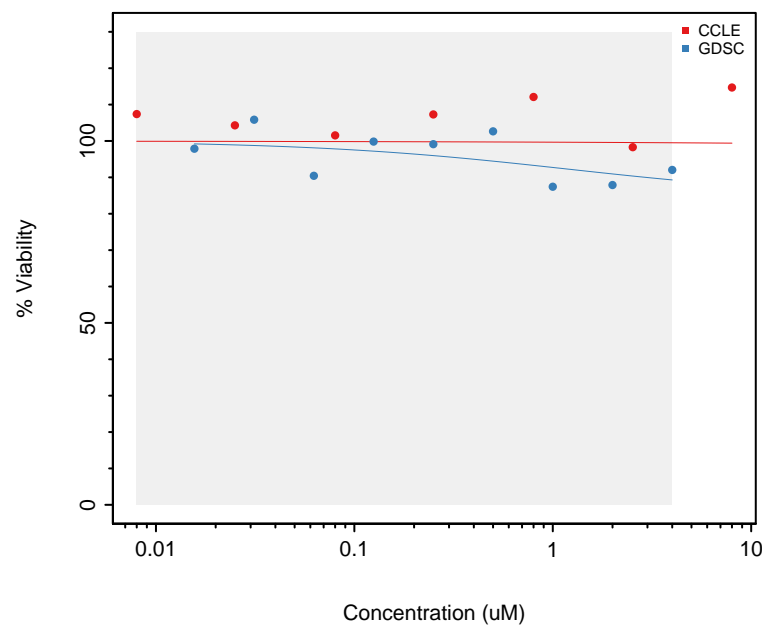

AZD6244:MC116

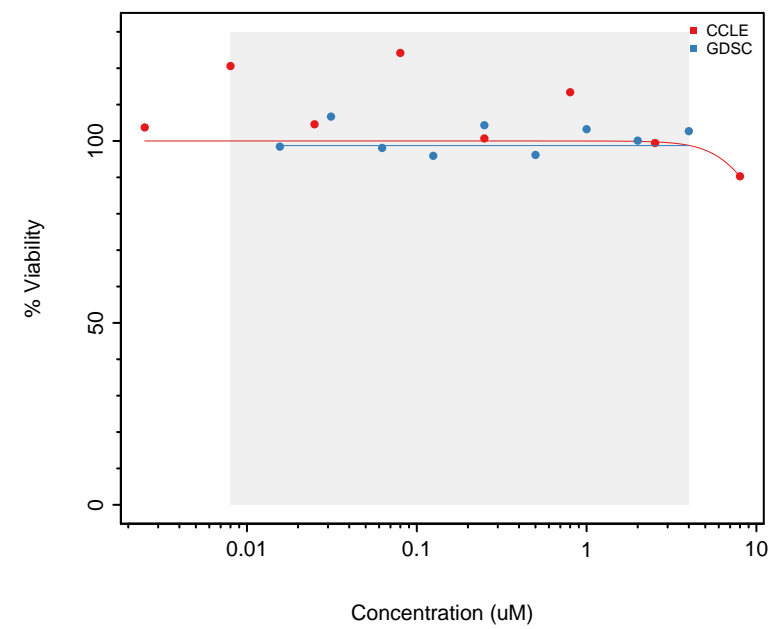

AZD6244:MDA-MB-175-VII

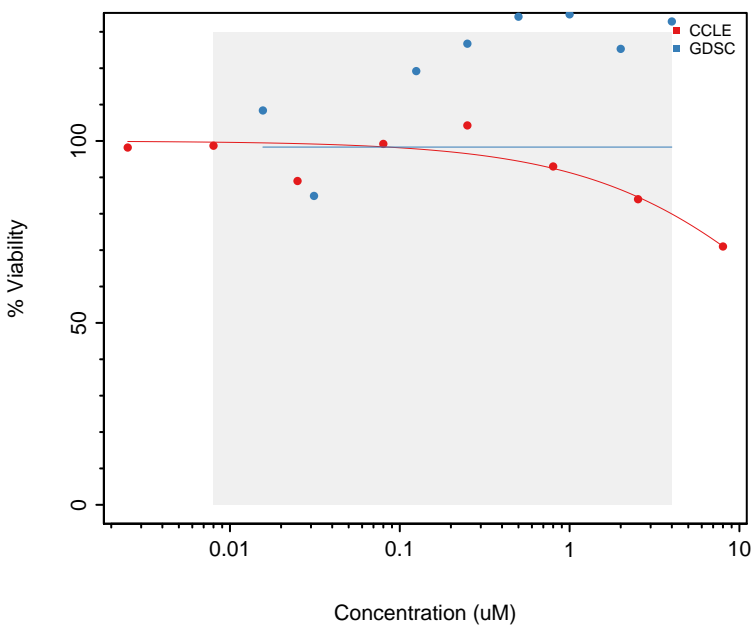

AZD6244:MDA-MB-415

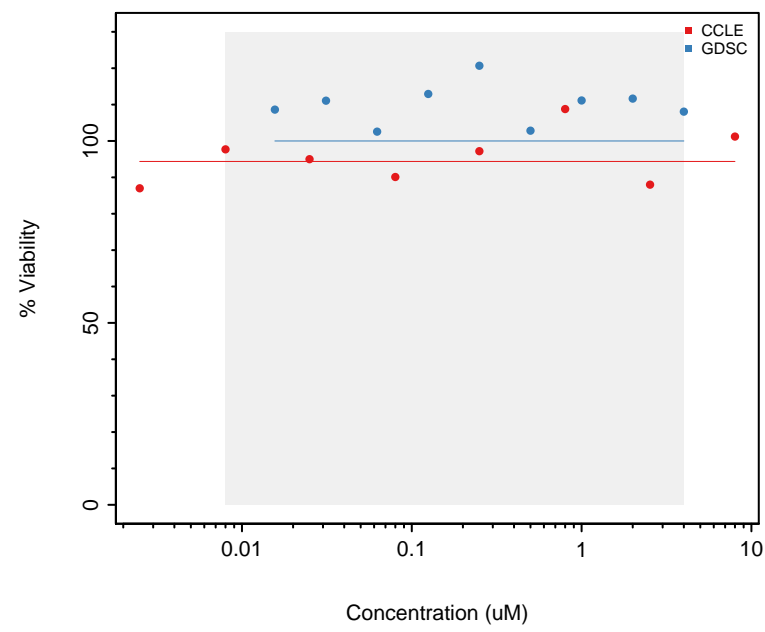

AZD6244:MDA-MB-453

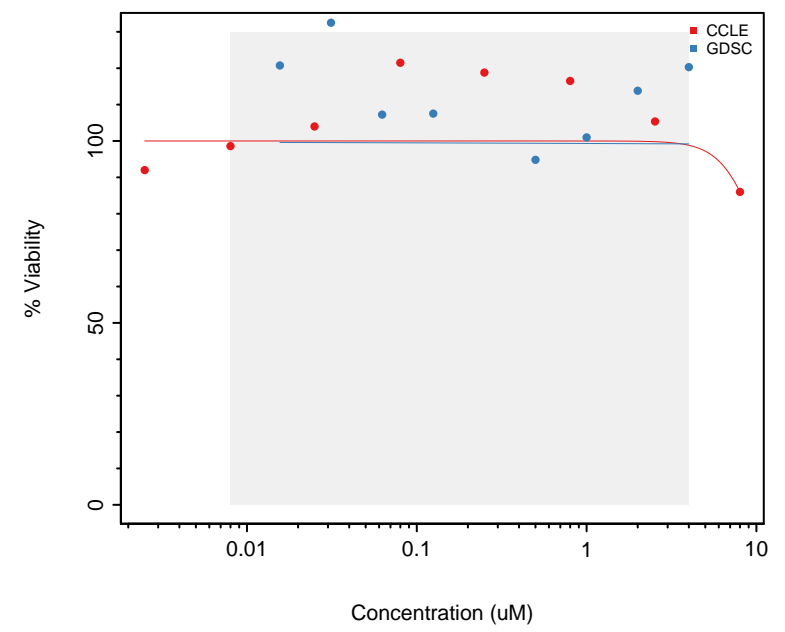

AZD6244:MDA-MB-468

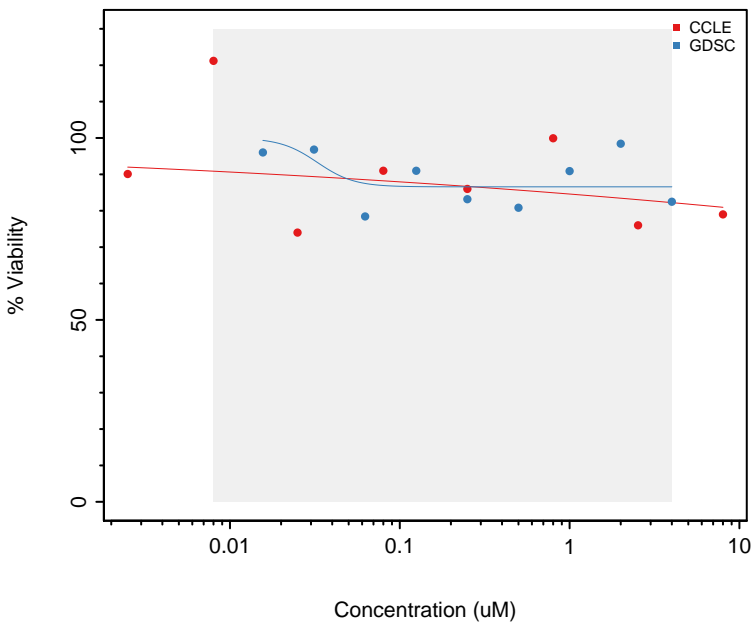

AZD6244:MEG-01

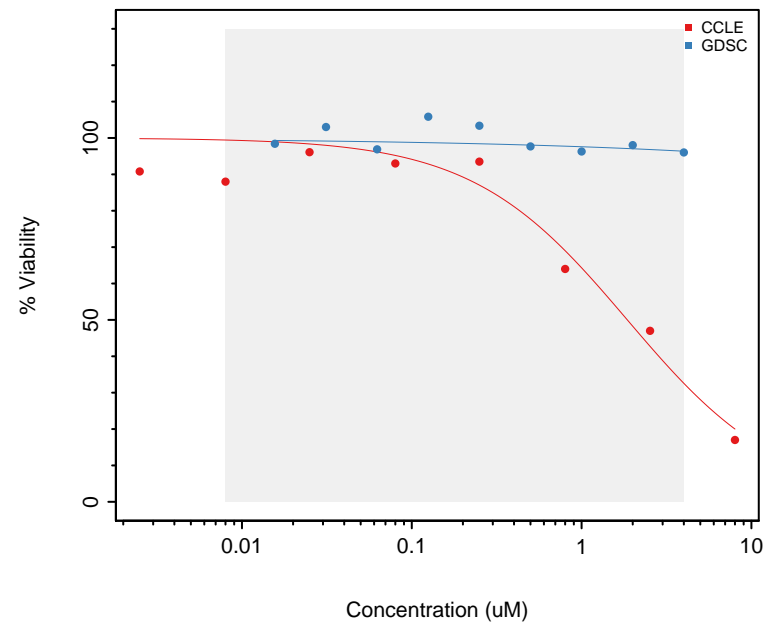

AZD6244:MEL-HO

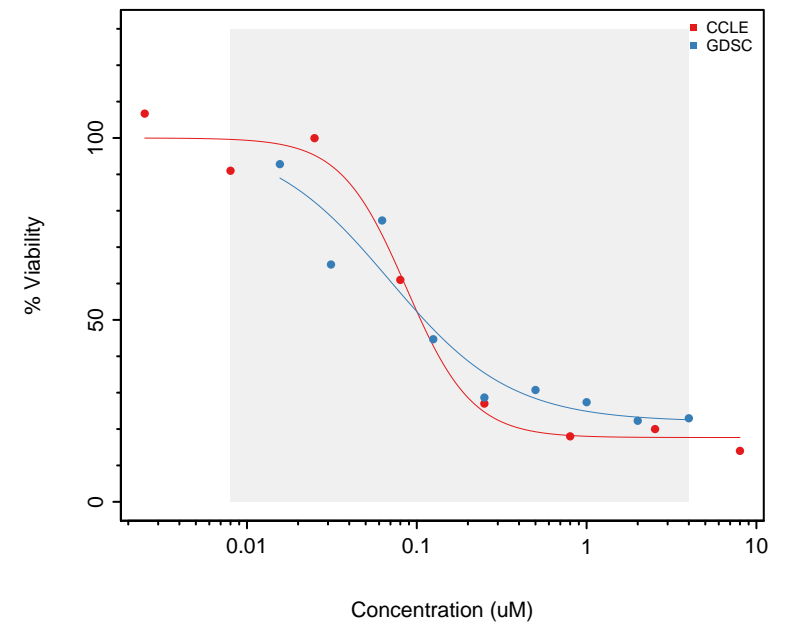

AZD6244:Mewo

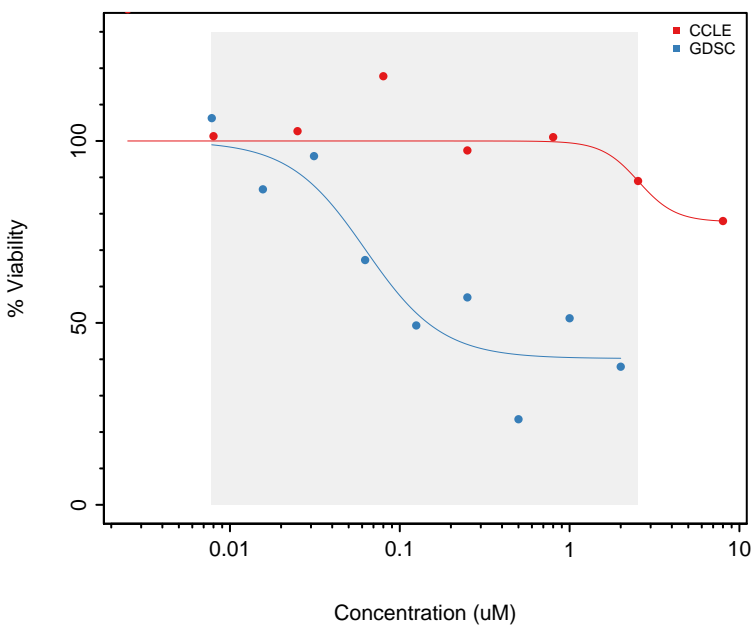

AZD6244:MFE-280

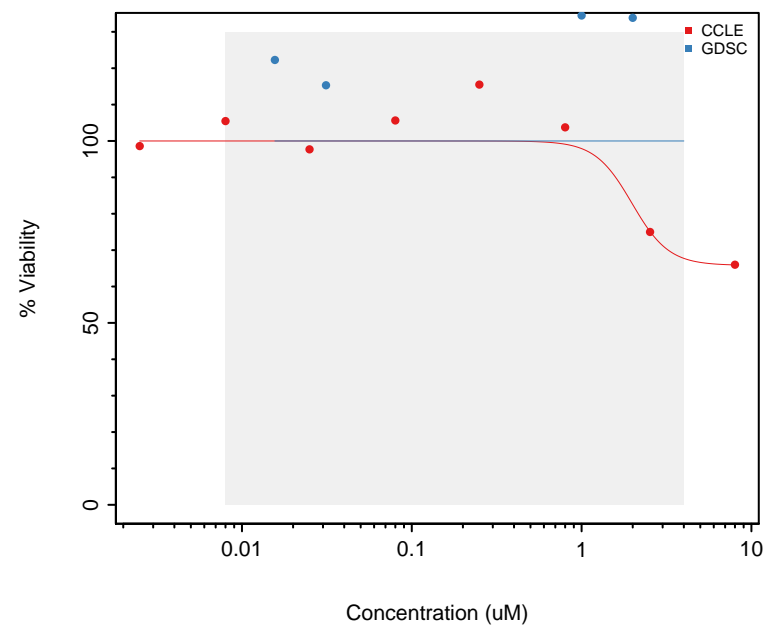

AZD6244:MFE-296

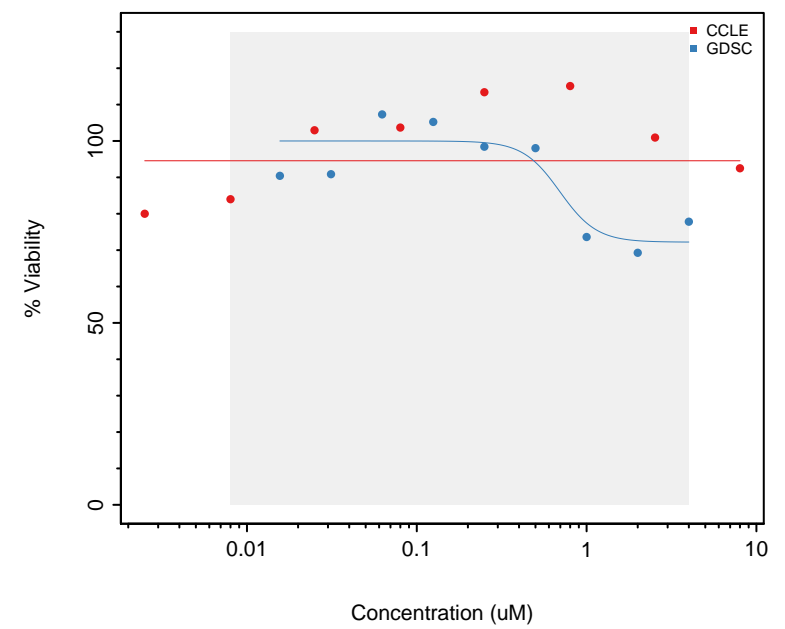

AZD6244:MG-63

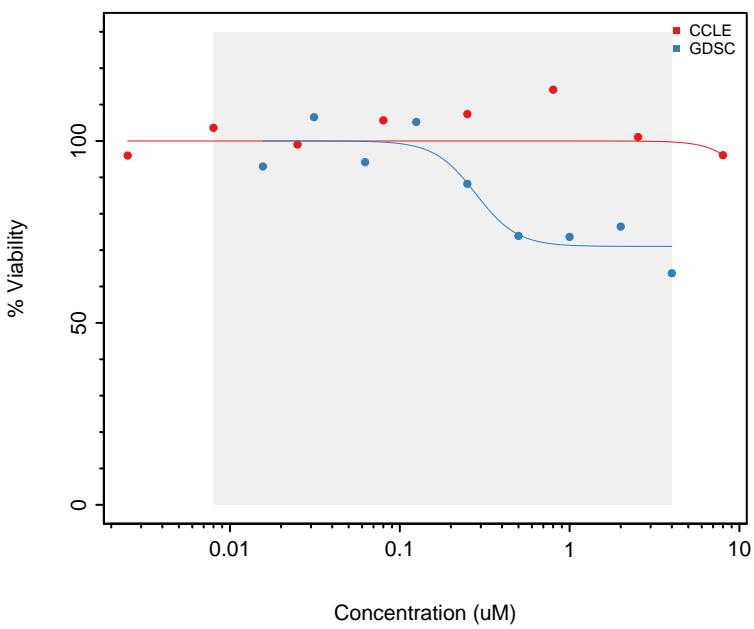

AZD6244:MHH-ES-1

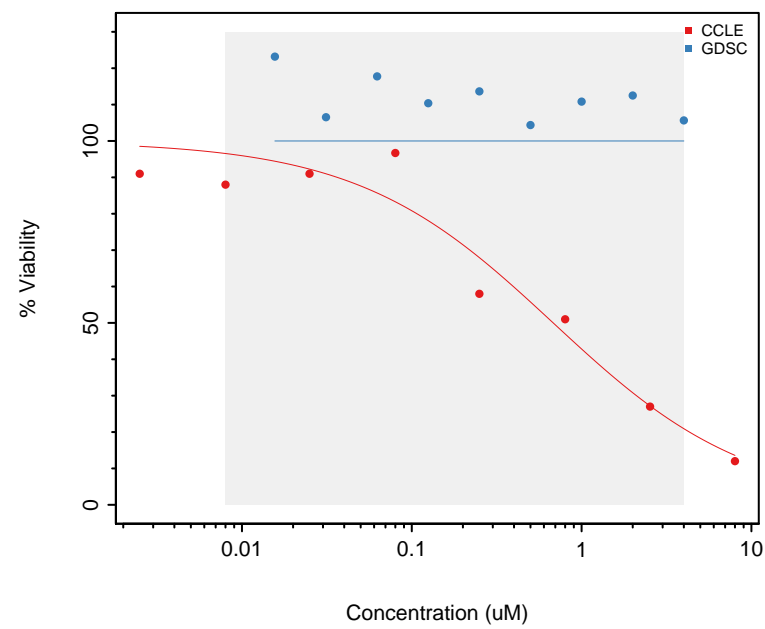

AZD6244:MIA-PaCa-2

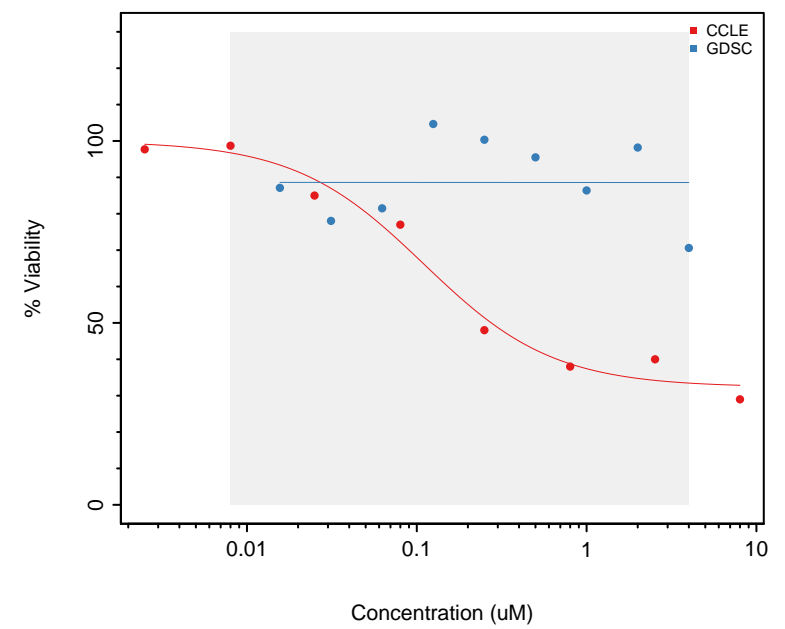

AZD6244:MKN7

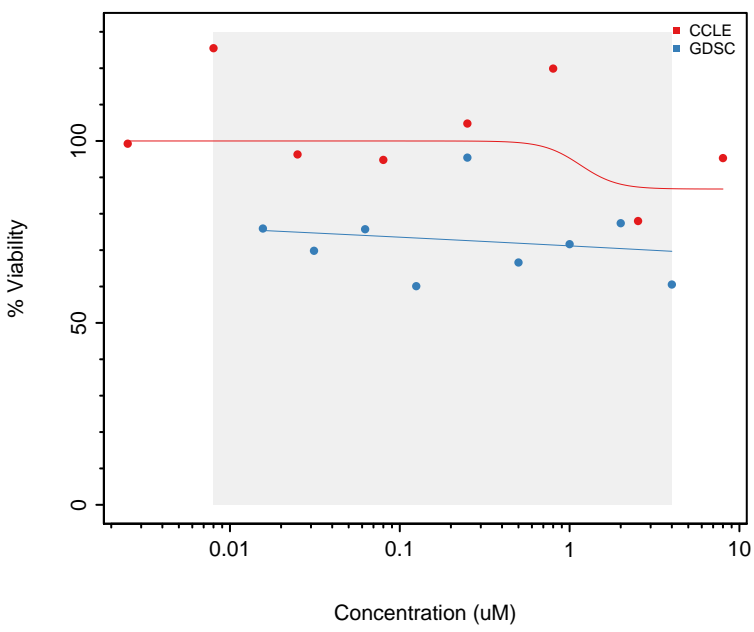

AZD6244:MOLT-16

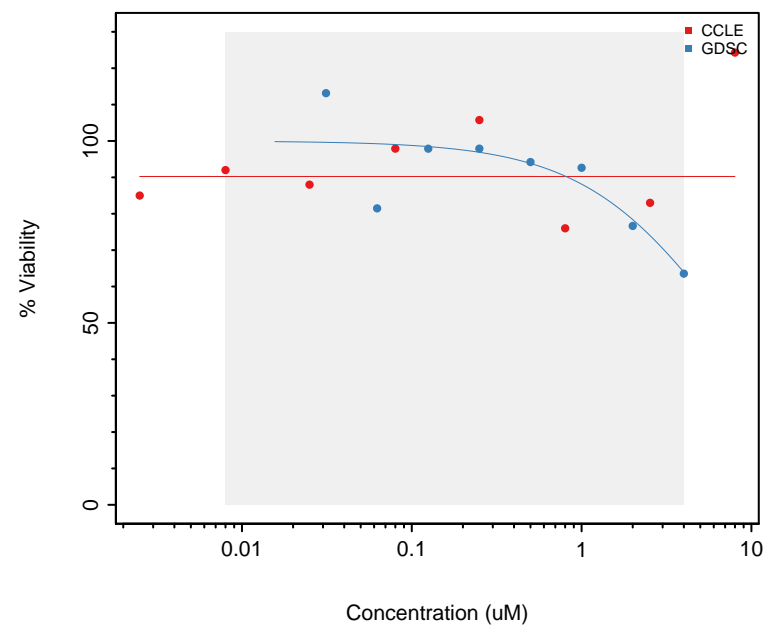

AZD6244:MPP-89

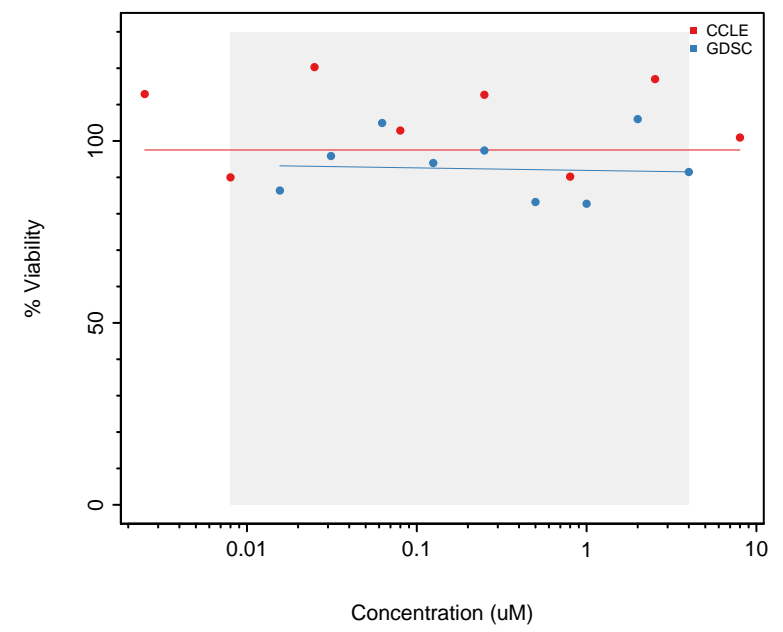

AZD6244:MSTO-211H

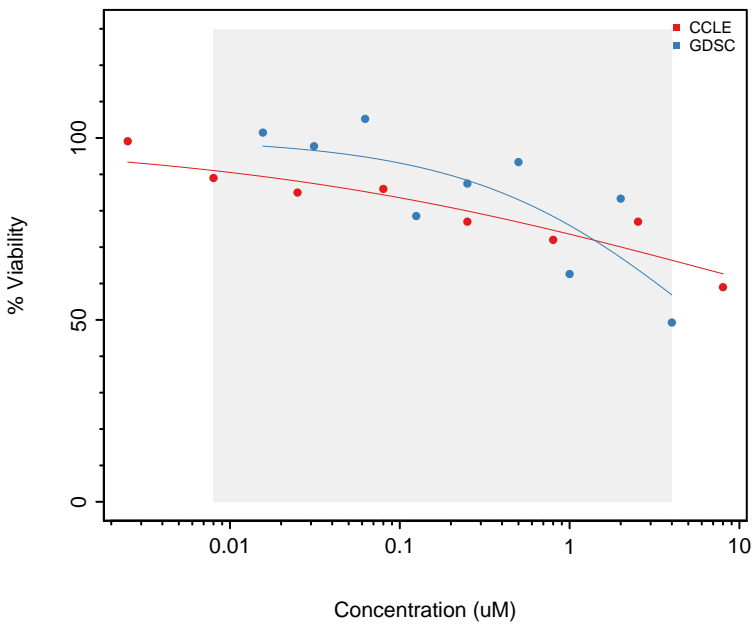

AZD6244:NCI-H1048

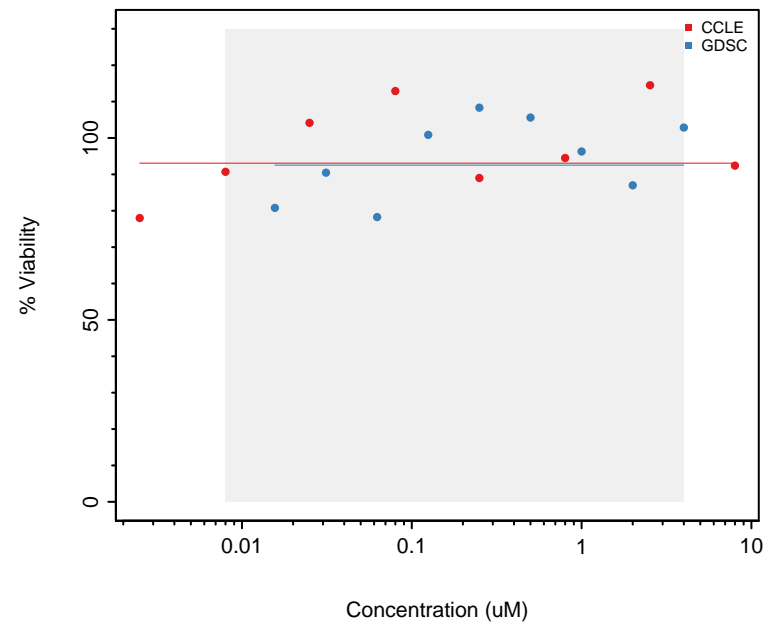

AZD6244:NCI-H1092

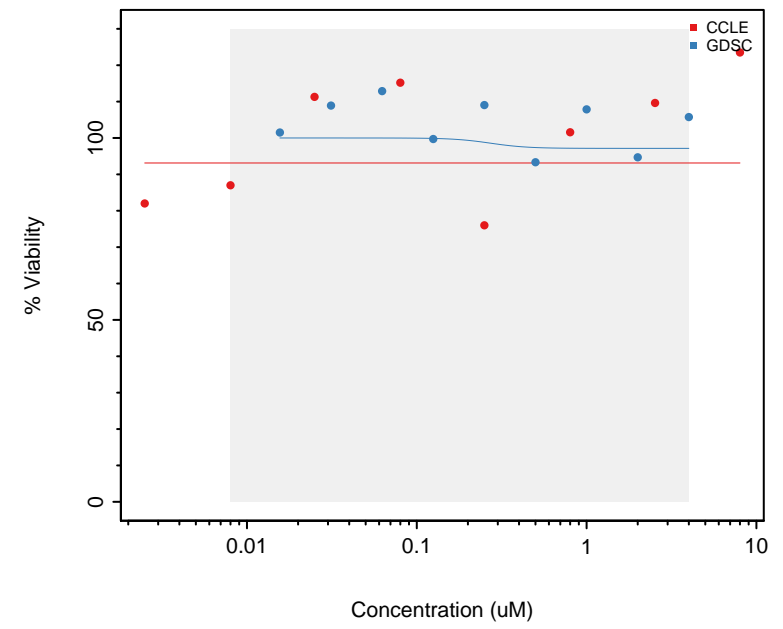

AZD6244:NCI-H1155

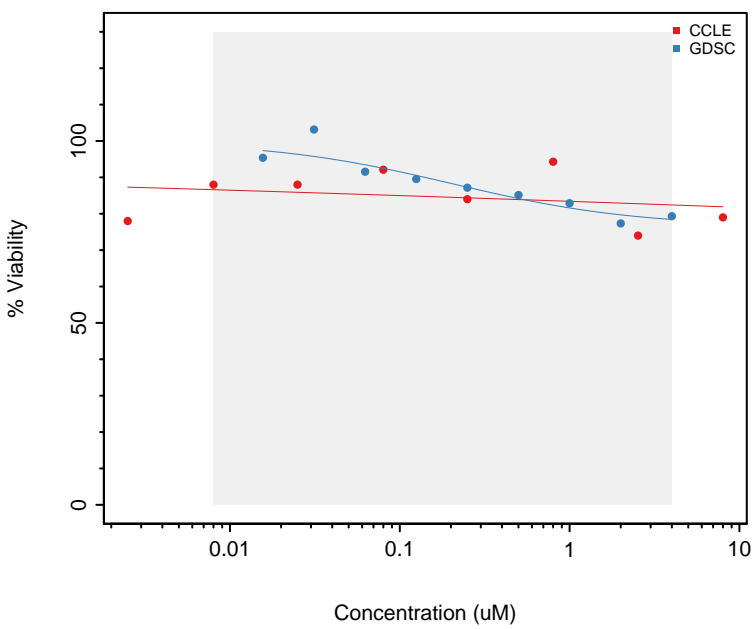

AZD6244:NCI-H1299

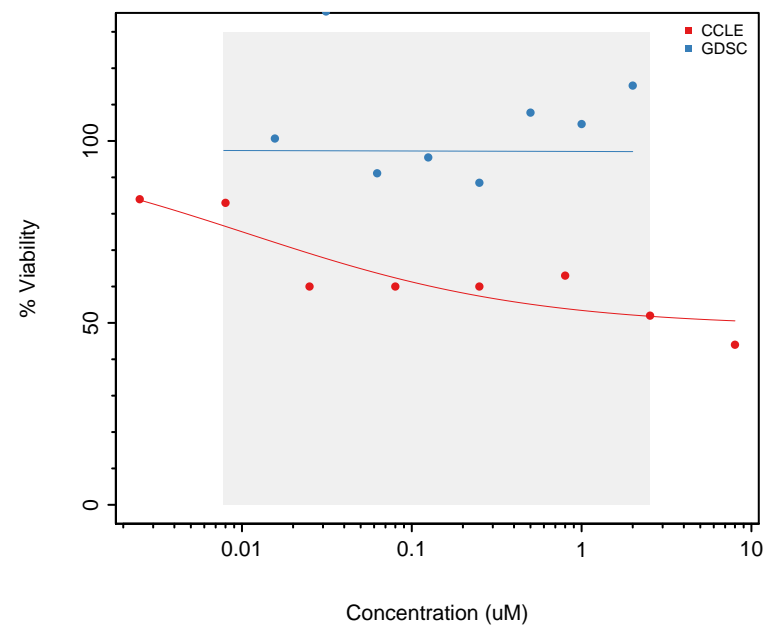

AZD6244:NCI-H1355

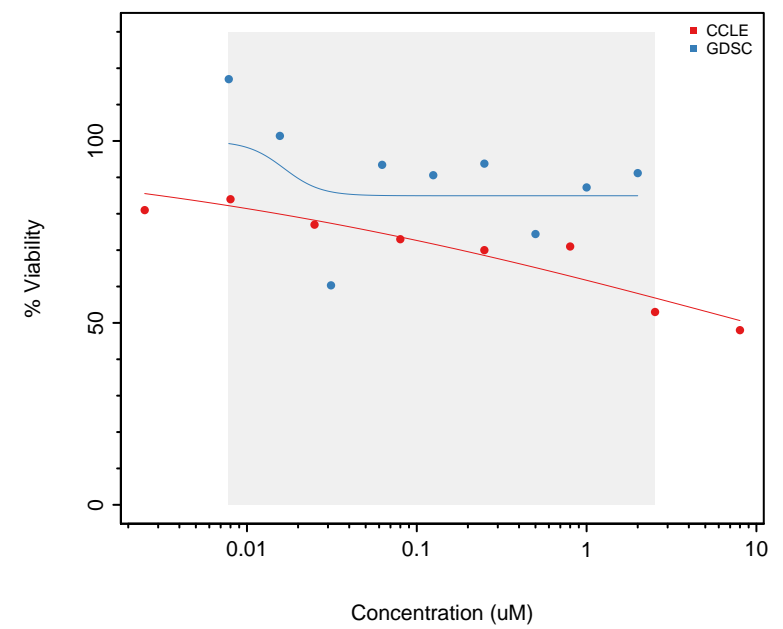

AZD6244:NCI-H1563

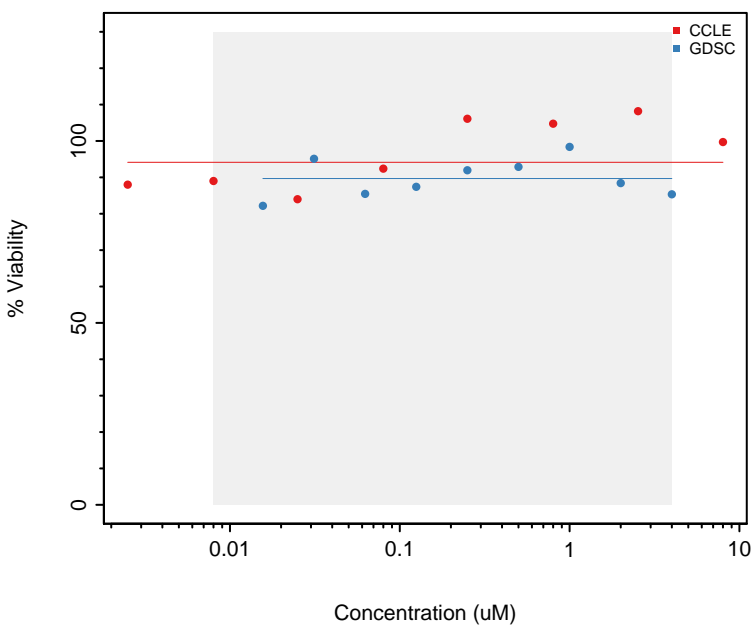

AZD6244:NCI-H1573

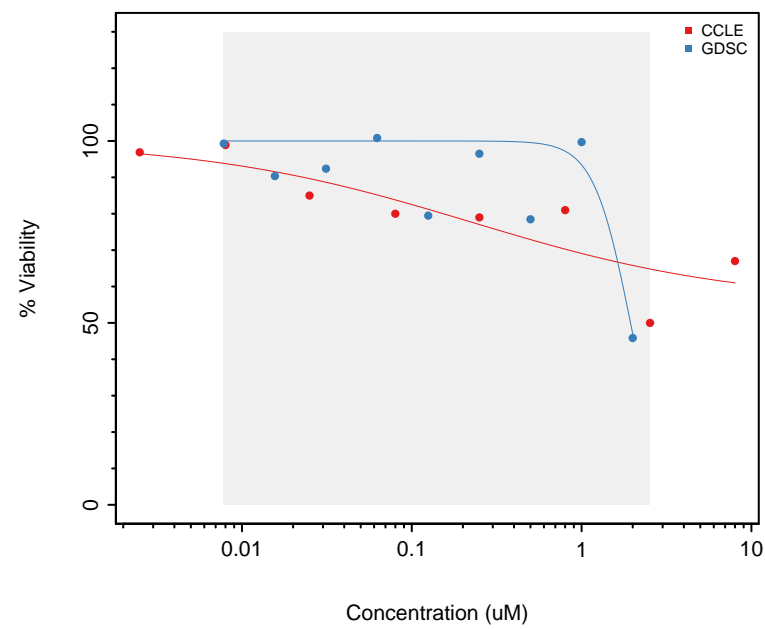

AZD6244:NCI-H1581

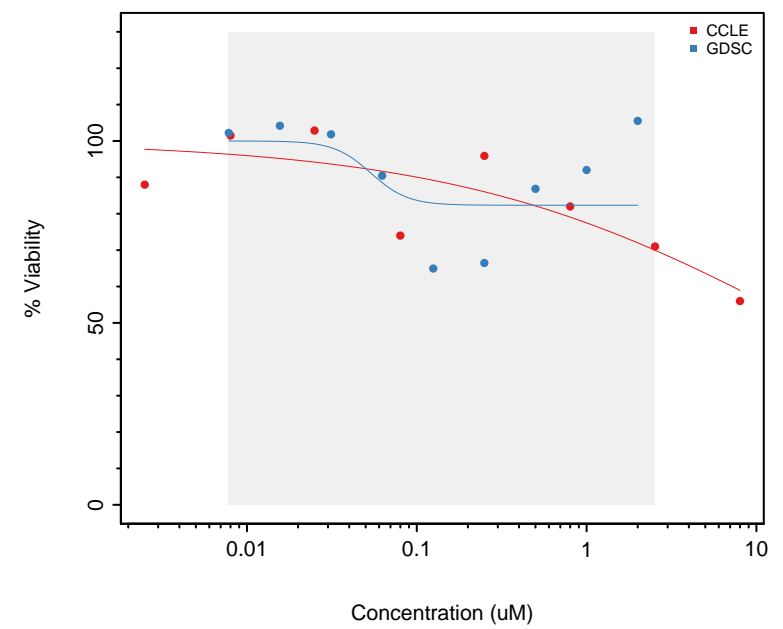

AZD6244:NCI-H1650

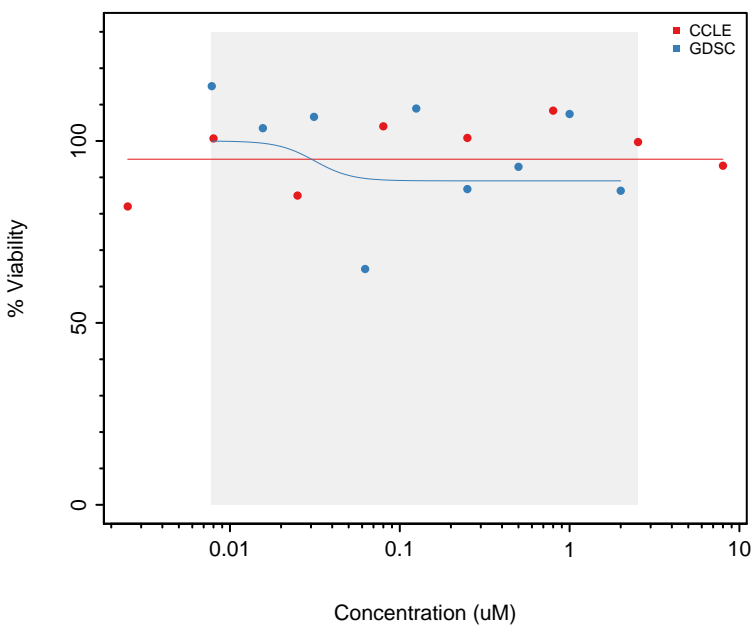

AZD6244:NCI-H1651

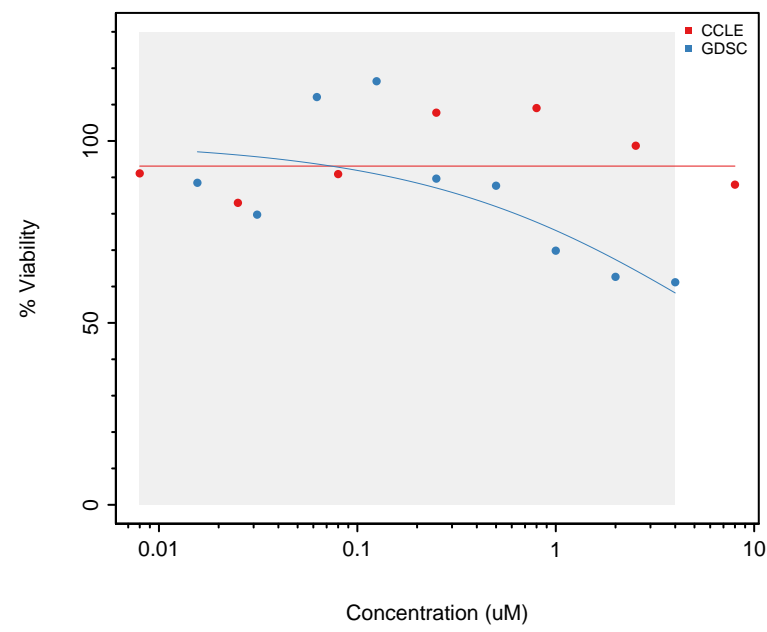

AZD6244:NCI-H1693

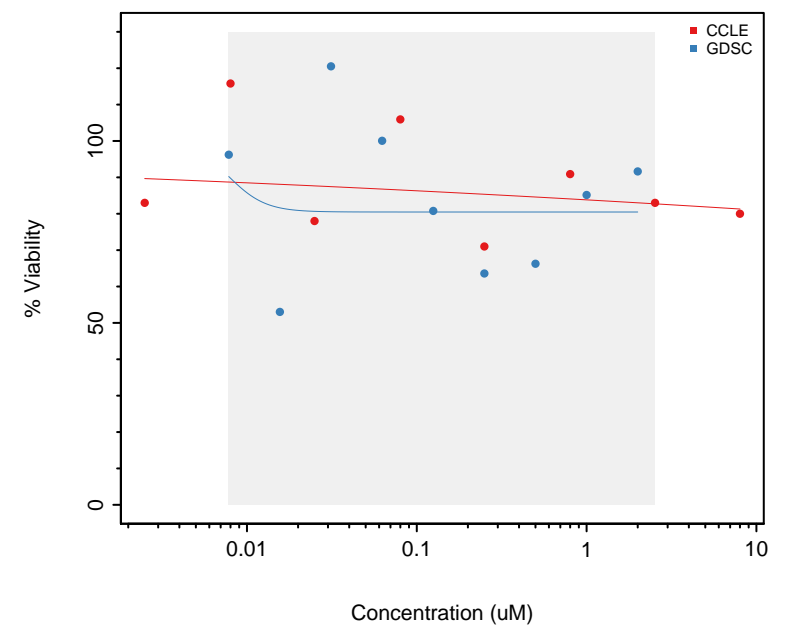

AZD6244:NCI-H1694

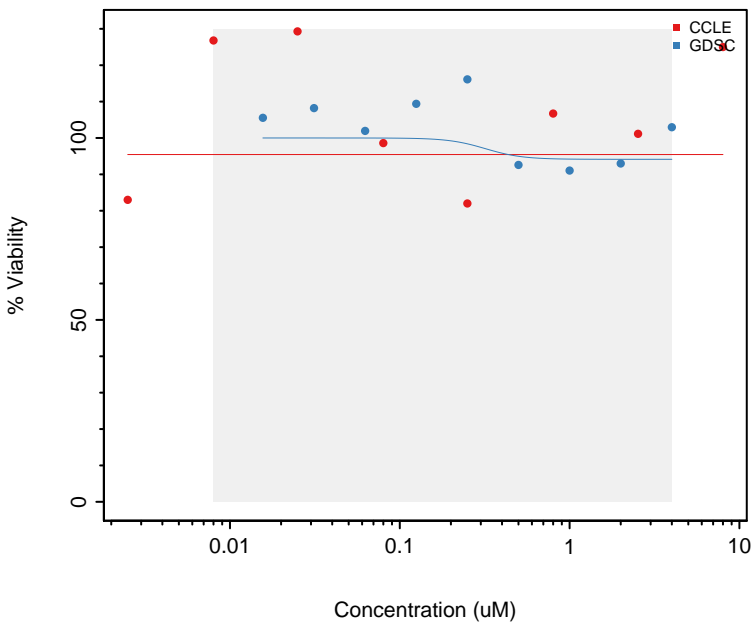

AZD6244:NCI-H1703

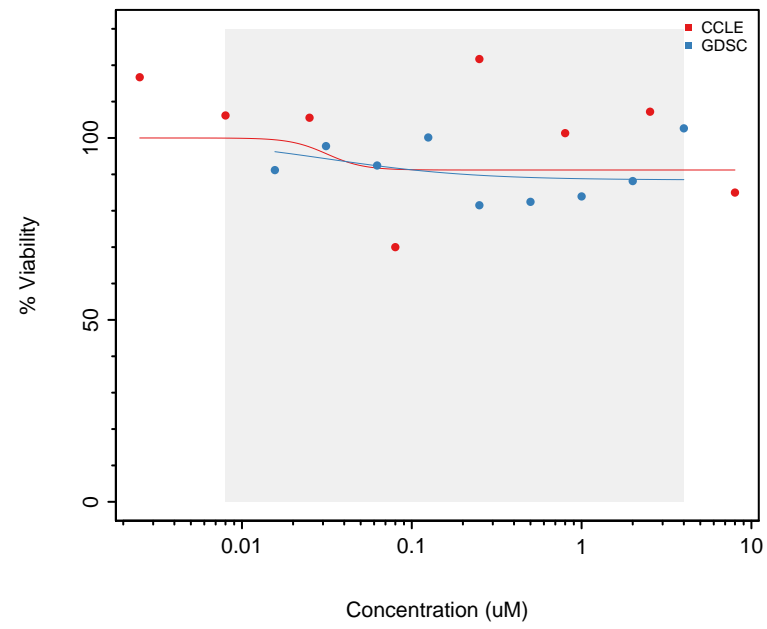

AZD6244:NCI-H1792

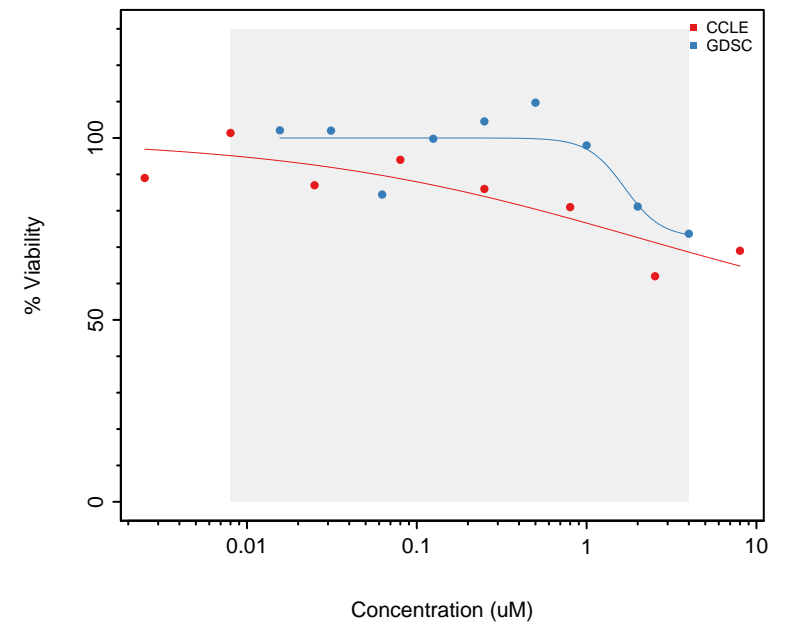

AZD6244:NCI-H1793

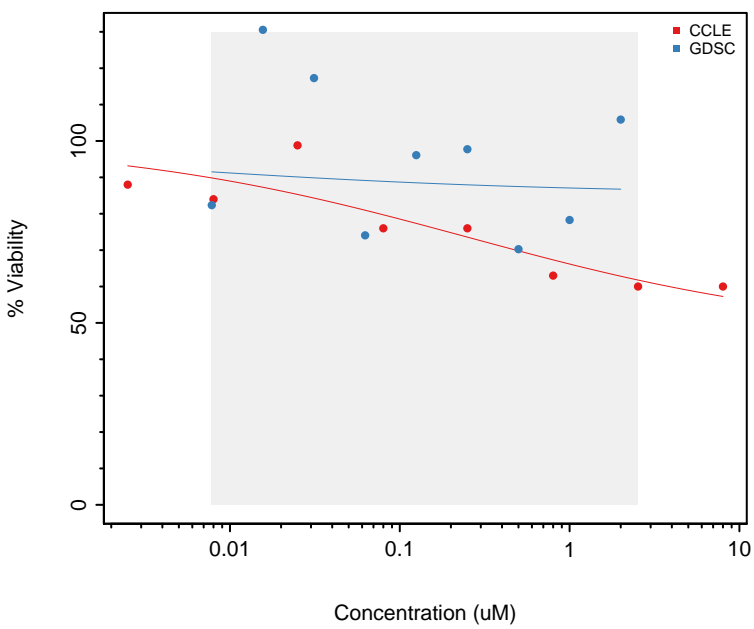

AZD6244:NCI-H1975

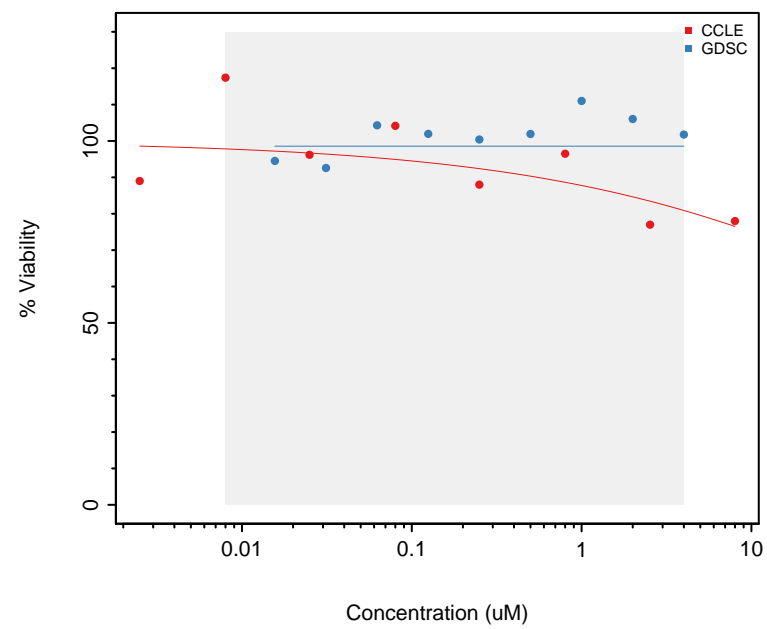

AZD6244:NCI-H2009

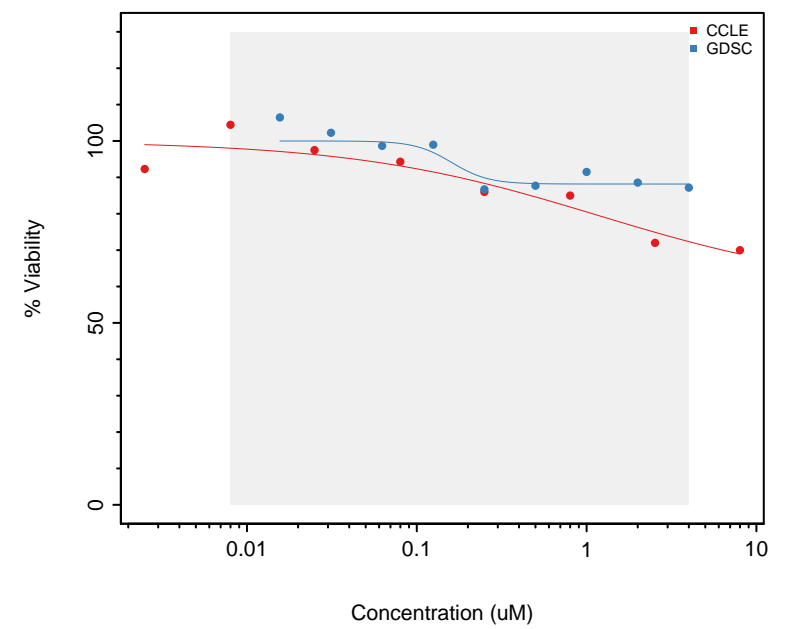

AZD6244:NCI-H2052

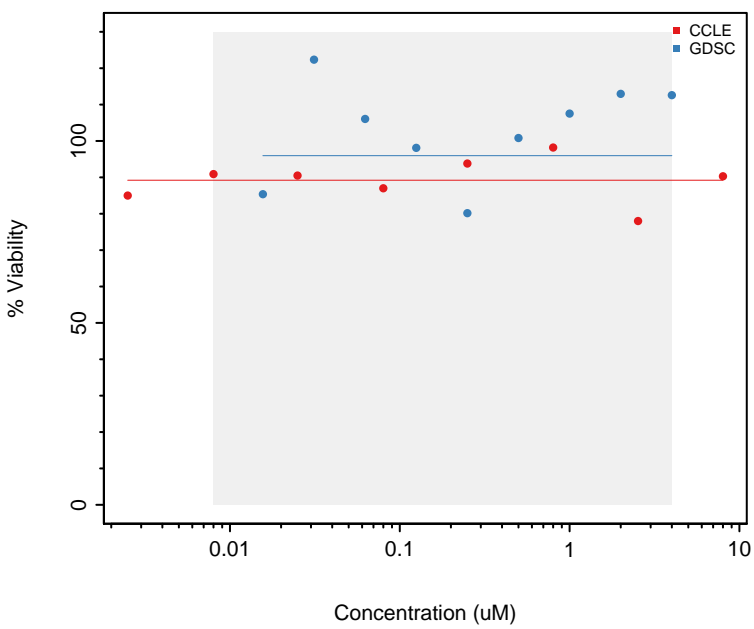

AZD6244:NCI-H2087

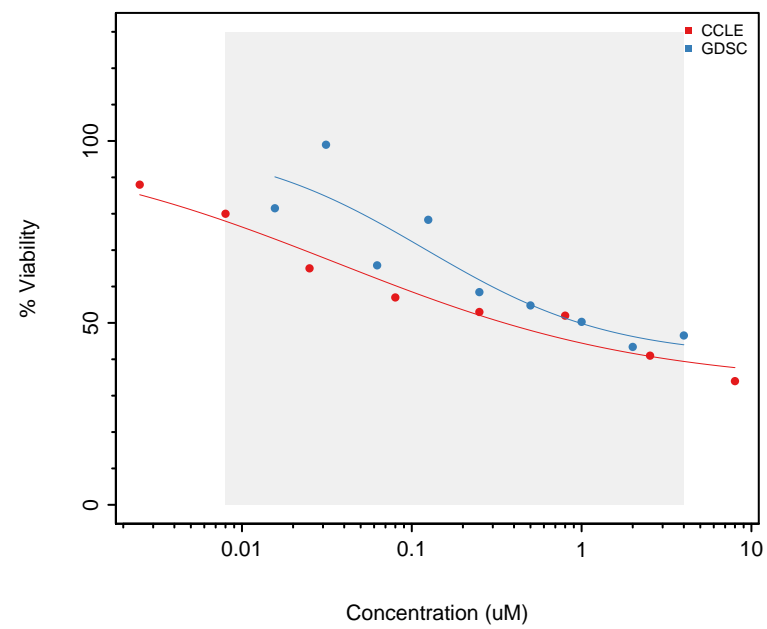

AZD6244:NCI-H2122

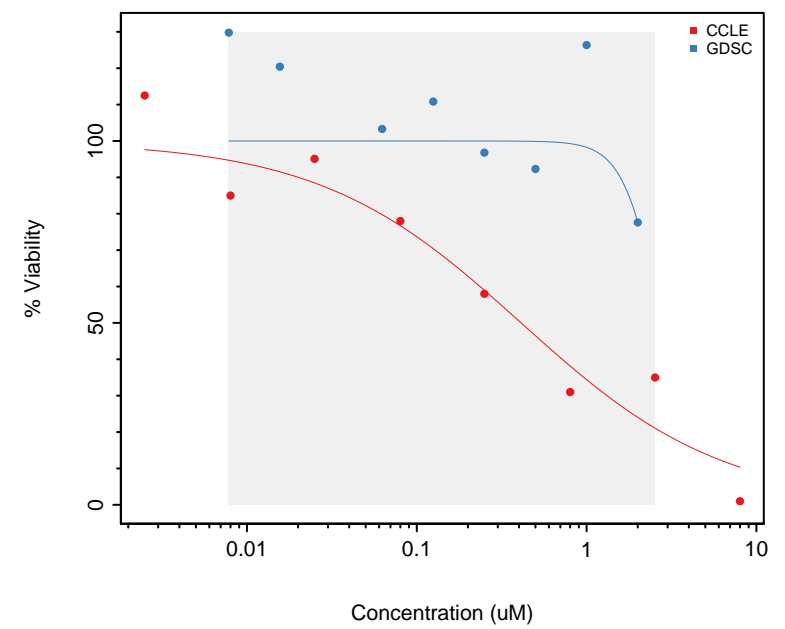



AZD6244:NCI-H747

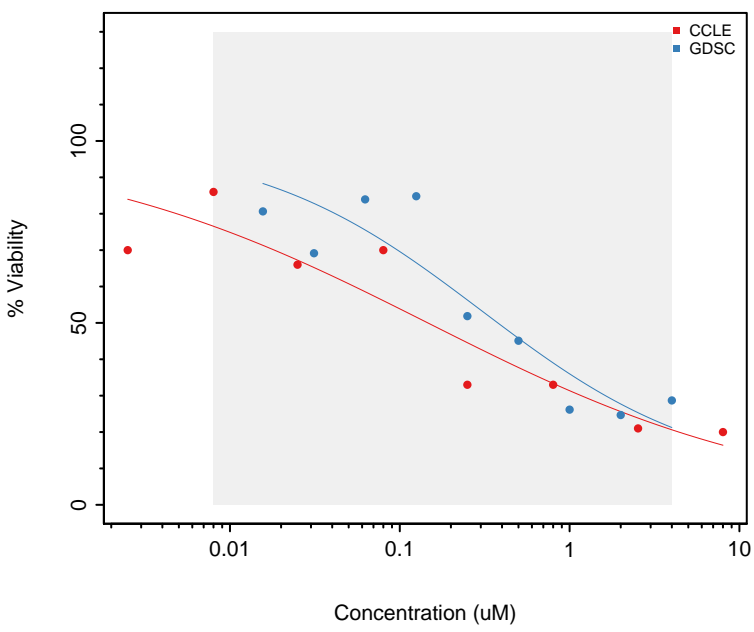

AZD6244:NCI-H810

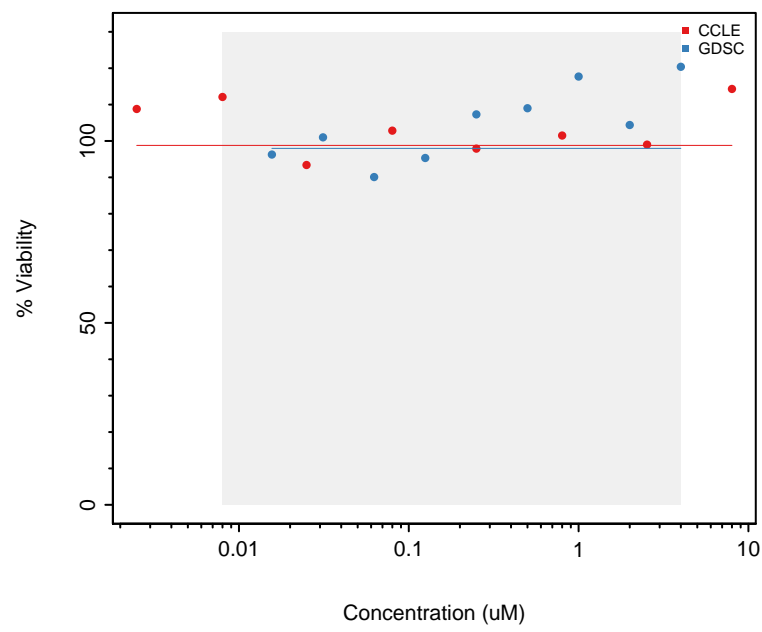

AZD6244:NCI-N87

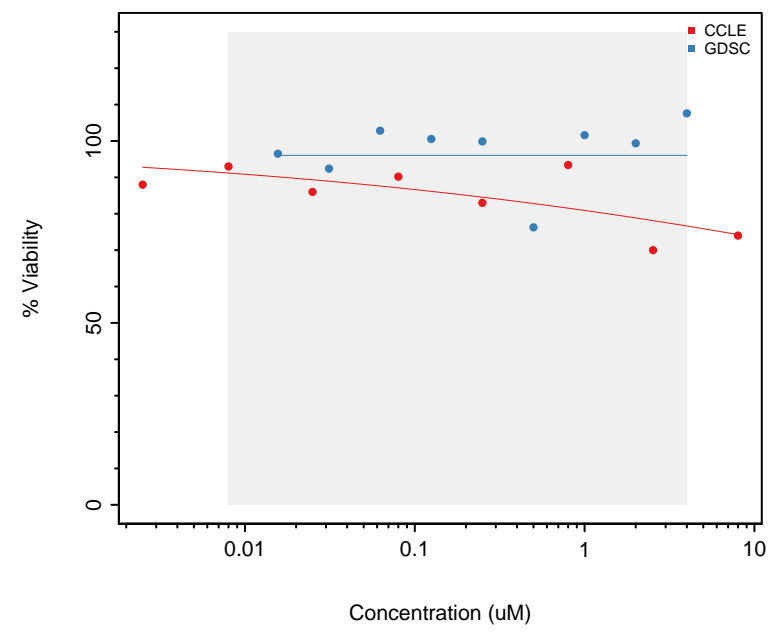

AZD6244:OVCAR-3

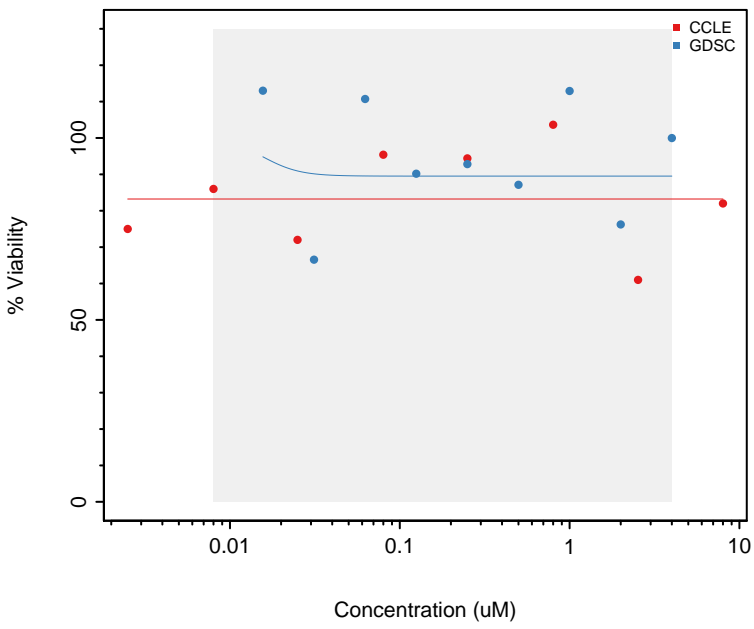

AZD6244:NUGC-3

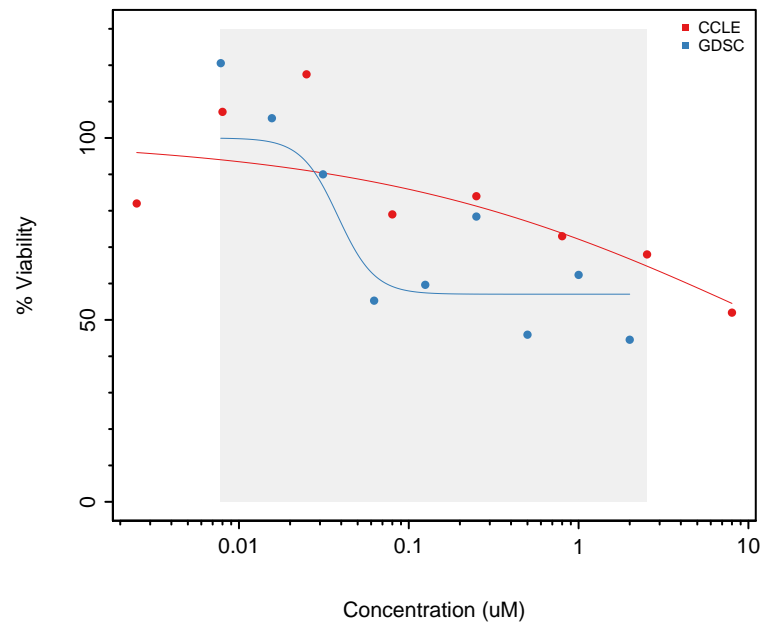

AZD6244:OC-314

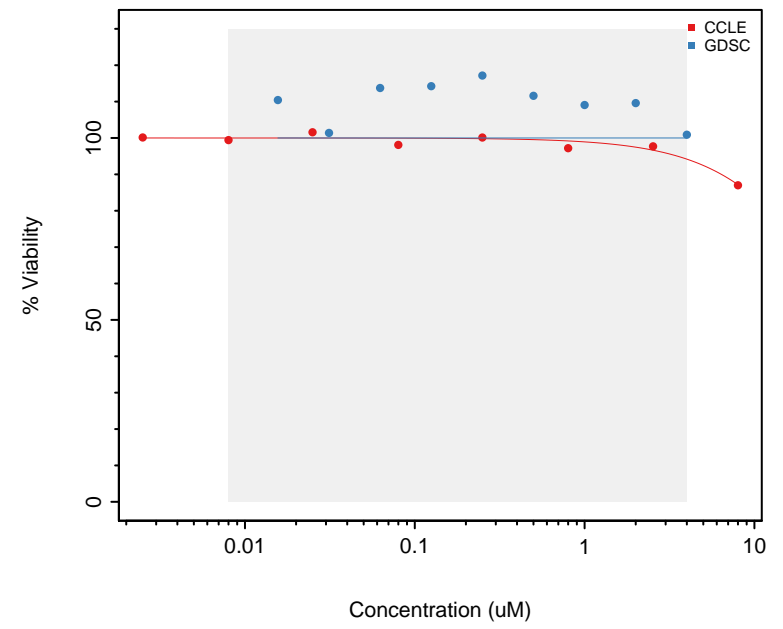

AZD6244:OE33

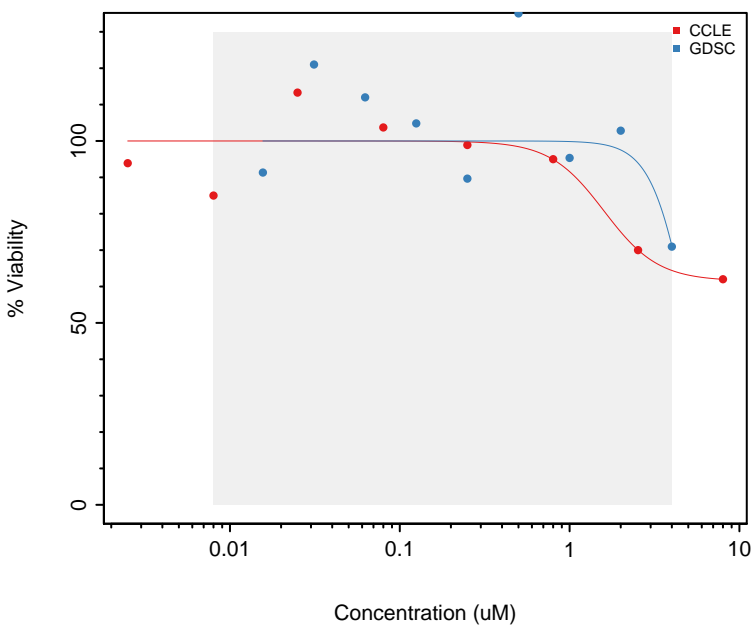

AZD6244:ONS-76

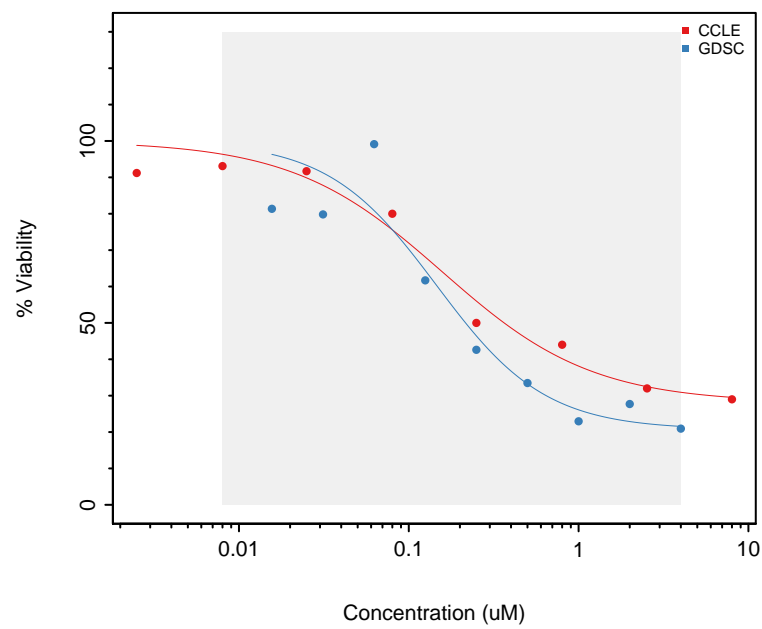

AZD6244:OPM-2

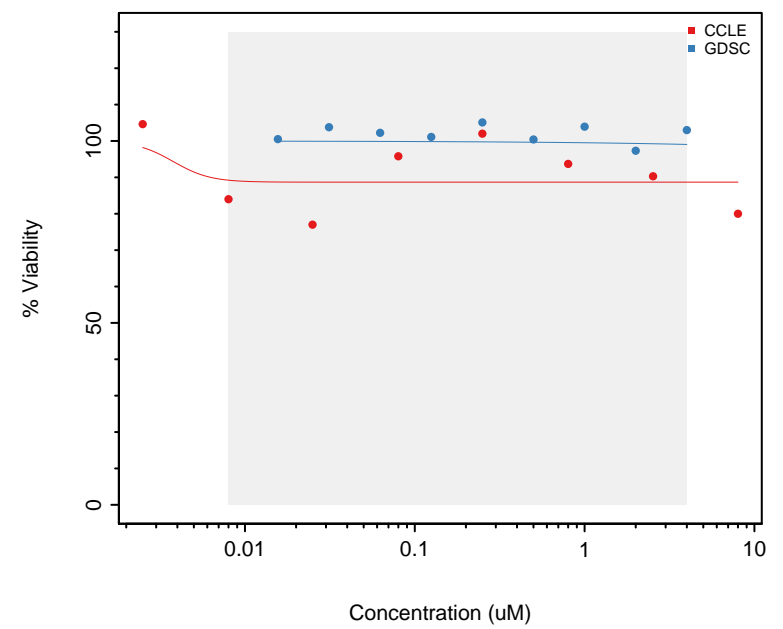

AZD6244:OVCAR-4

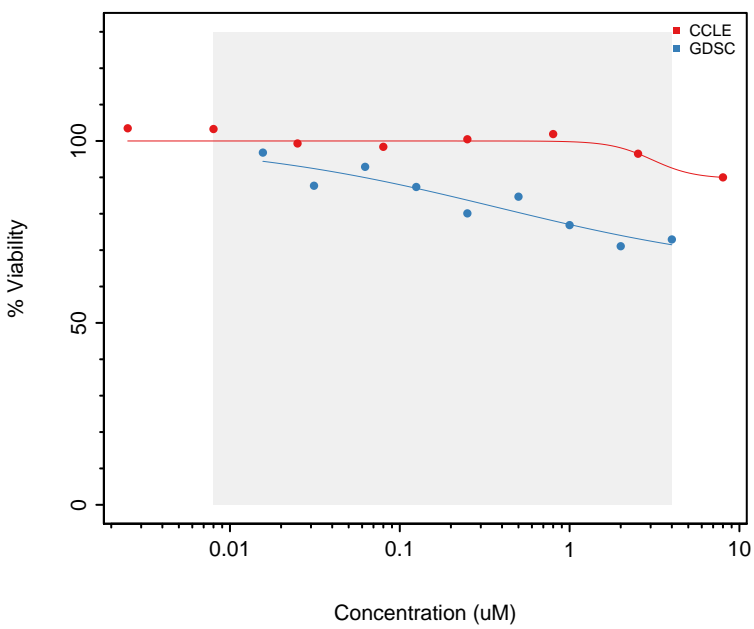

AZD6244:OVCAR-8

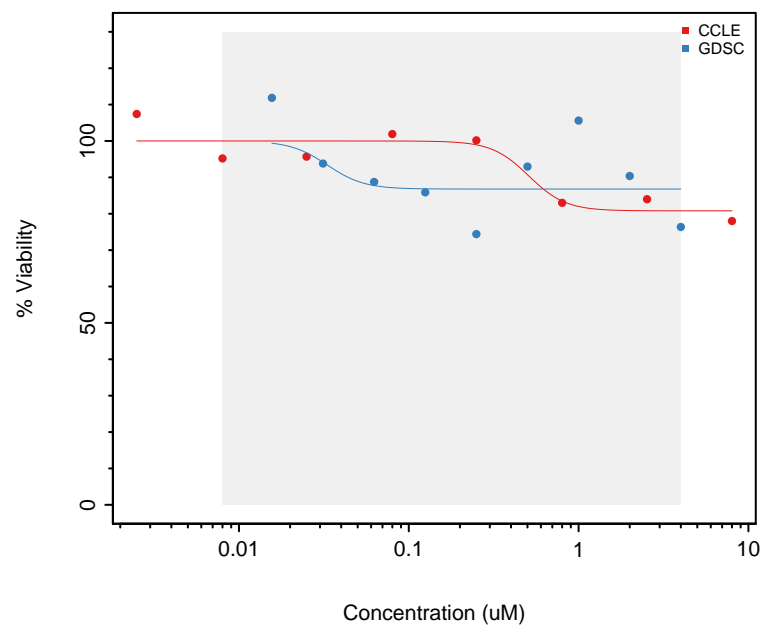

AZD6244:P12-ICHIKAWA

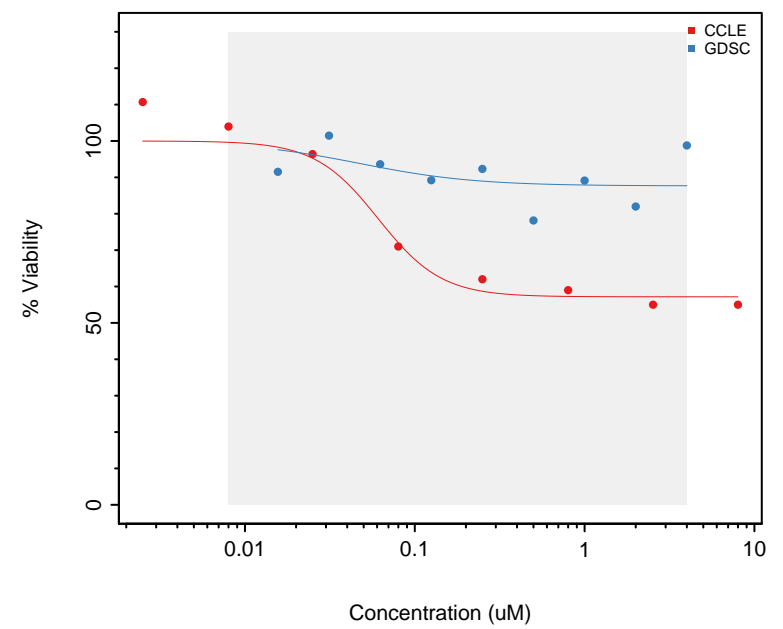

AZD6244:P31-FUJ

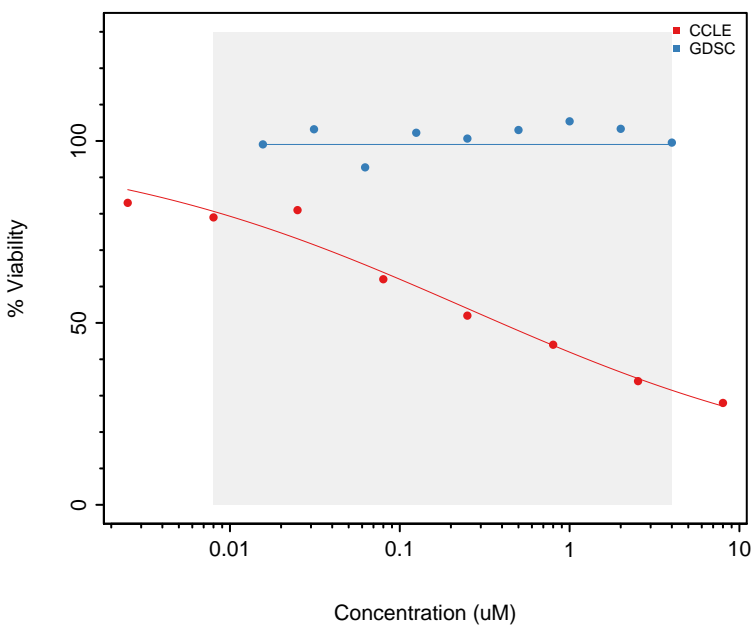

AZD6244:Panc 03.27

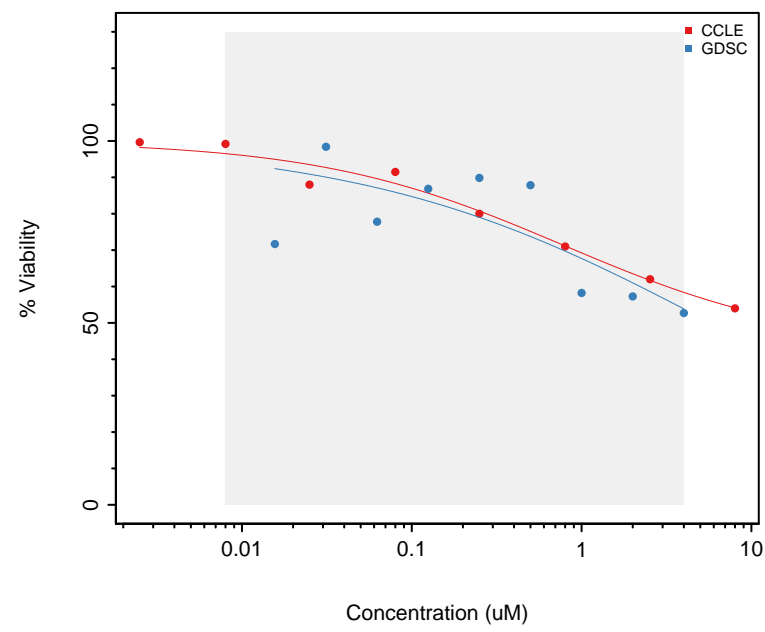

AZD6244:Panc 10.05

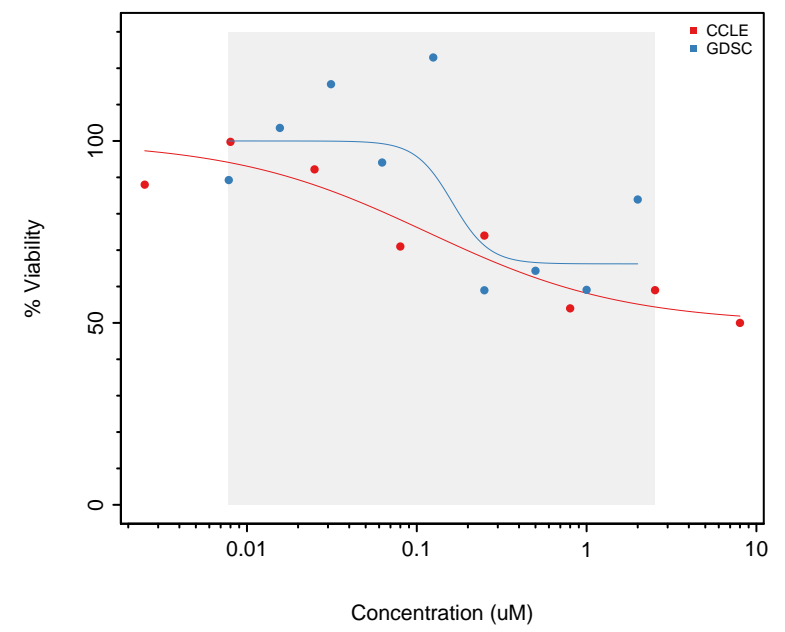

AZD6244:PC-14

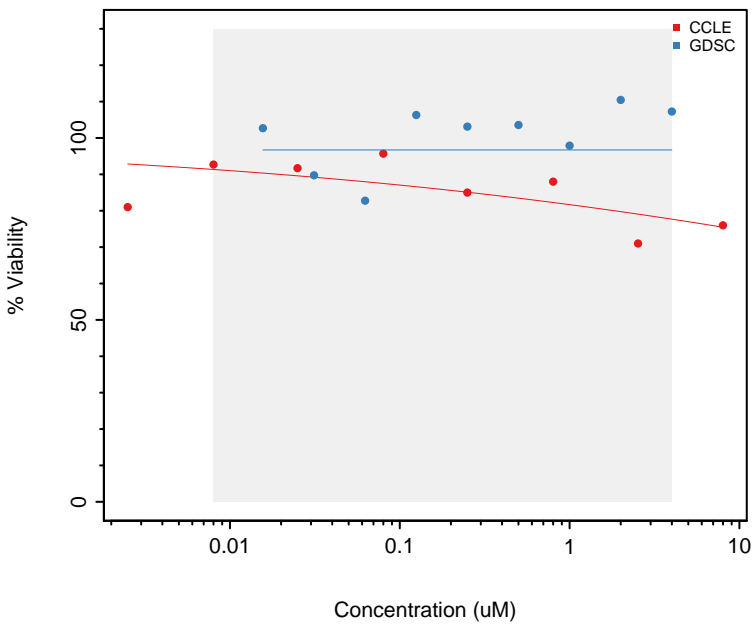

AZD6244:PSN1

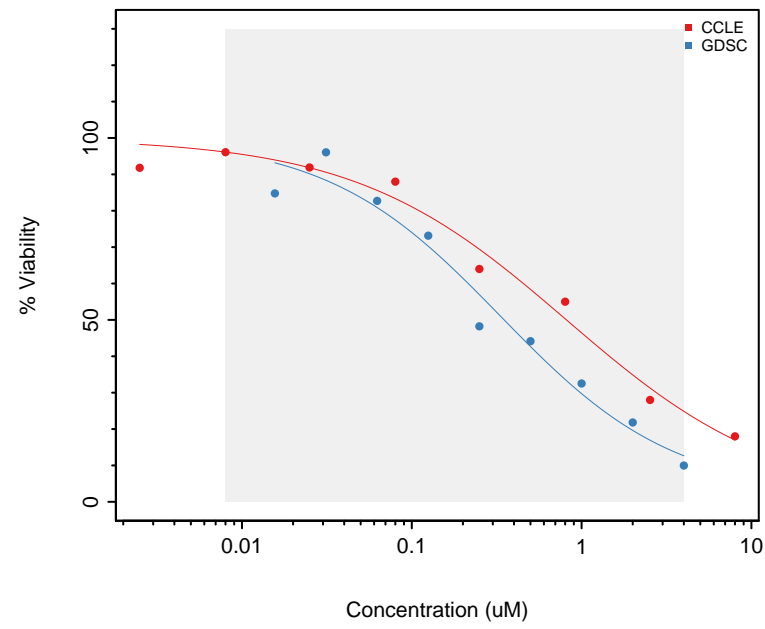

AZD6244:Raji

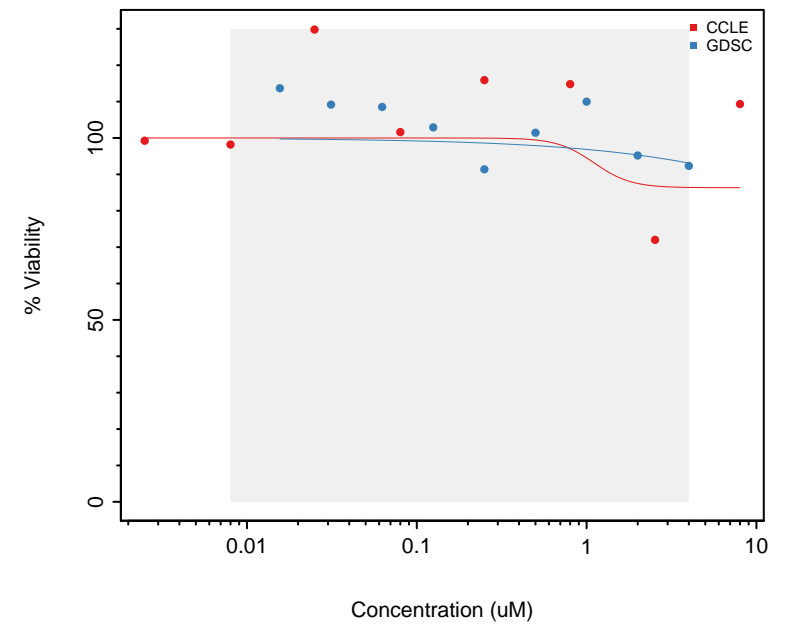

AZD6244:REH

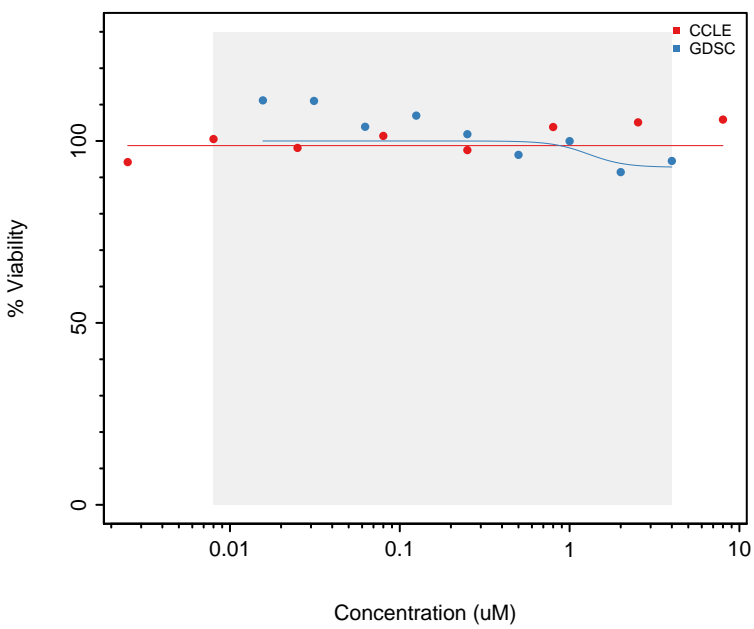

AZD6244:RKO

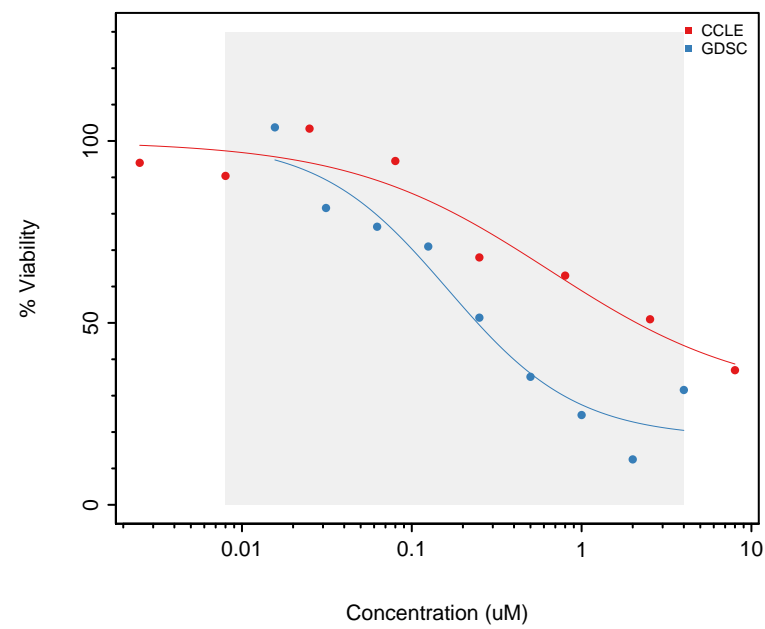

AZD6244:RL95-2

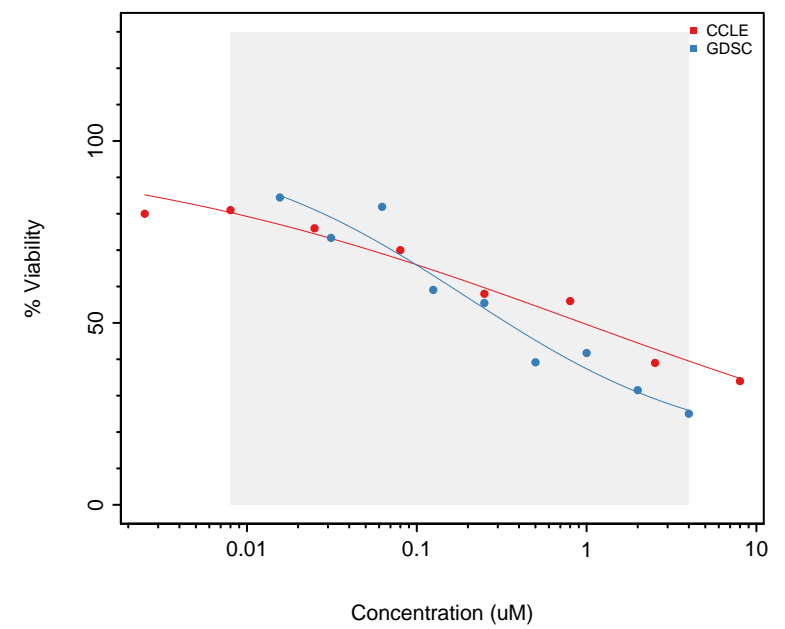

AZD6244:RPMI-7951

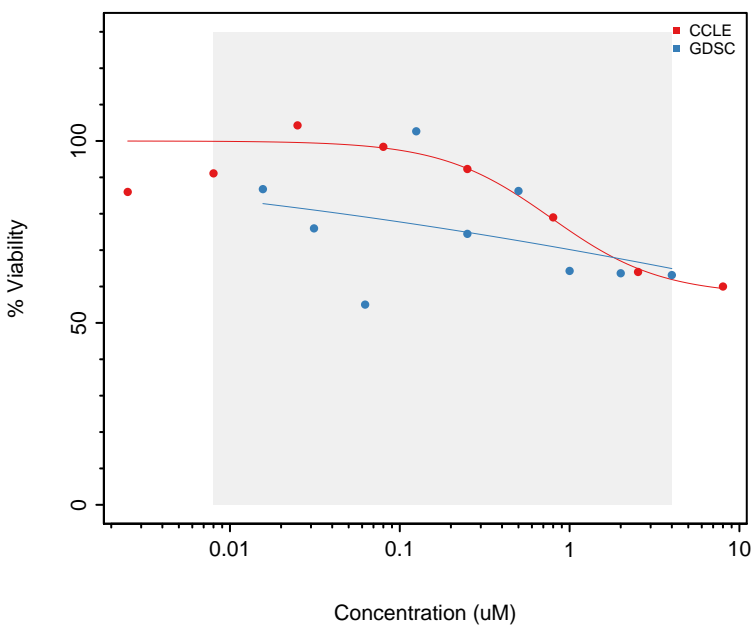

AZD6244:RPMI-8402

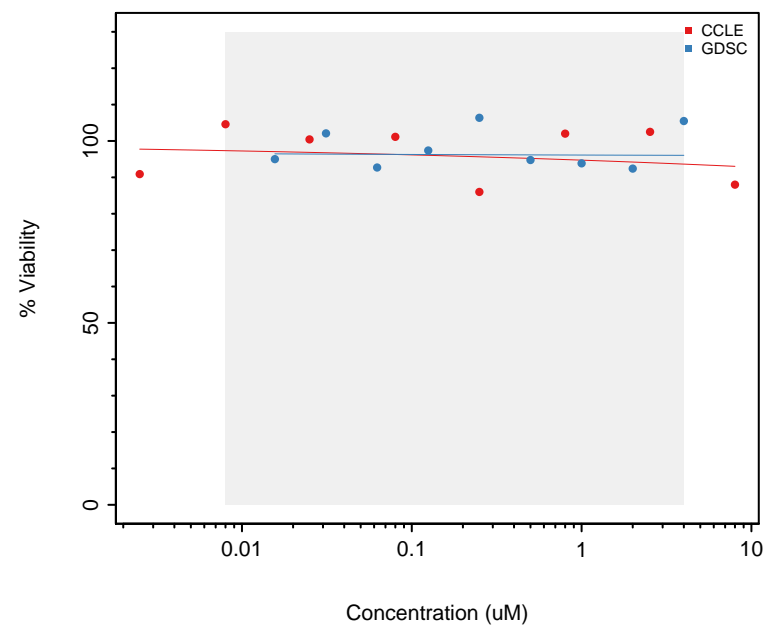

AZD6244:RT-112

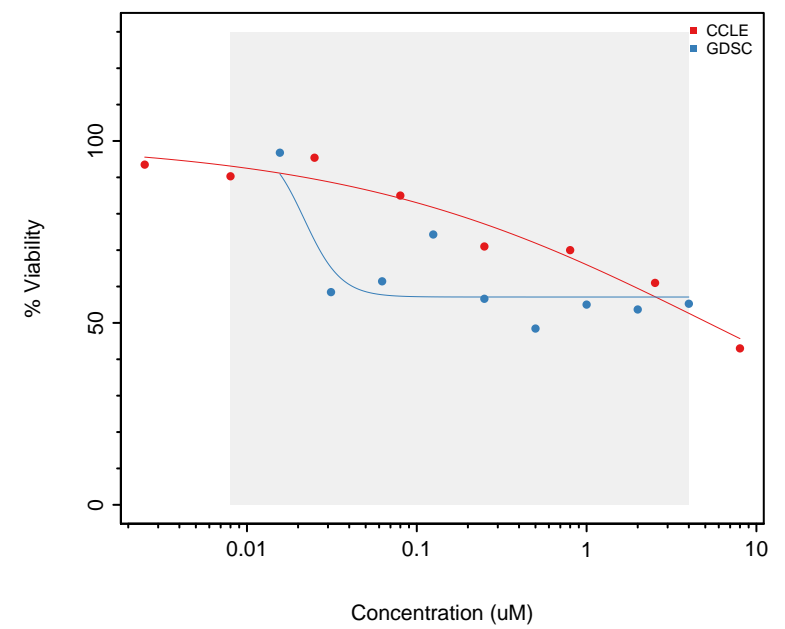





AZD6244:SK-HEP-1

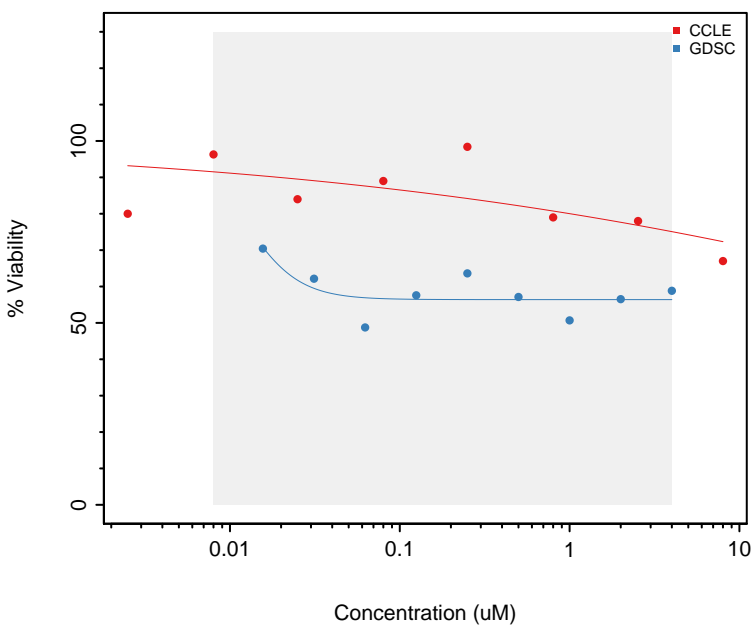

AZD6244:SK-LU-1

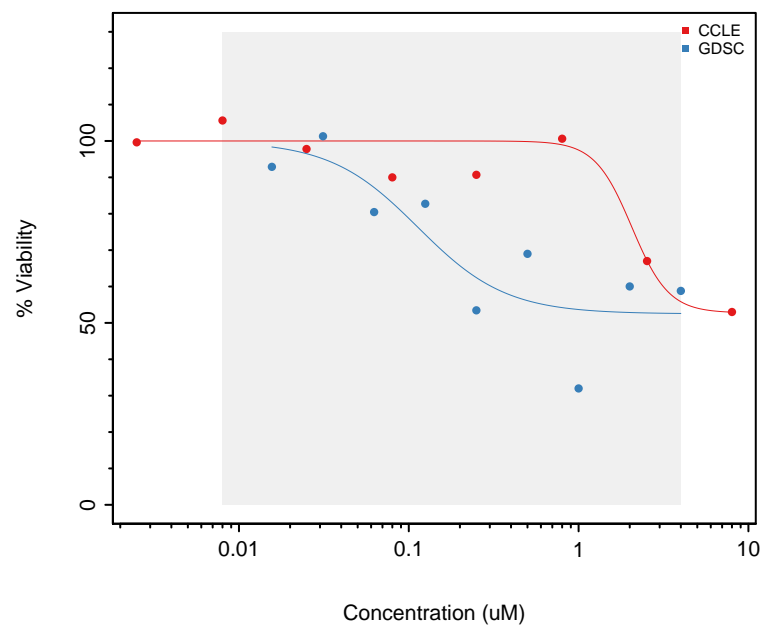

AZD6244:SK-MEL-2

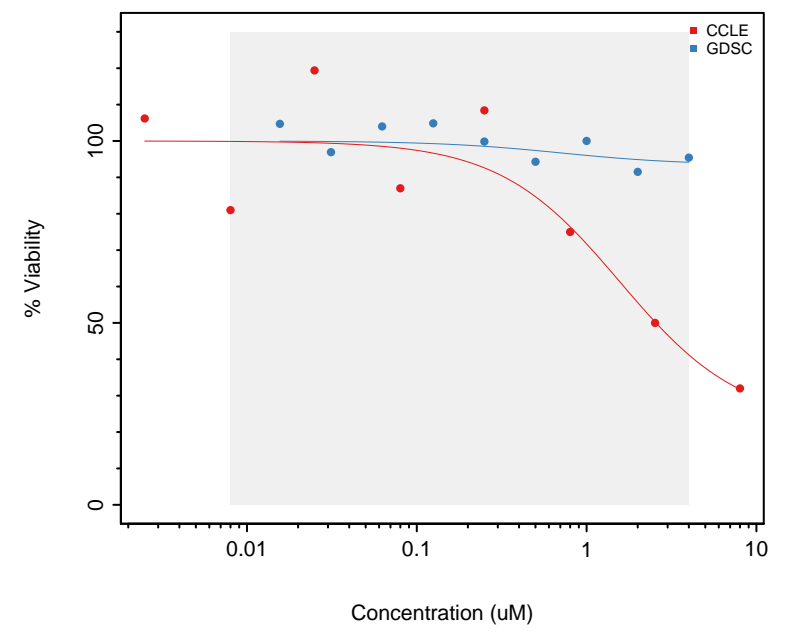

AZD6244:SK-MEL-30

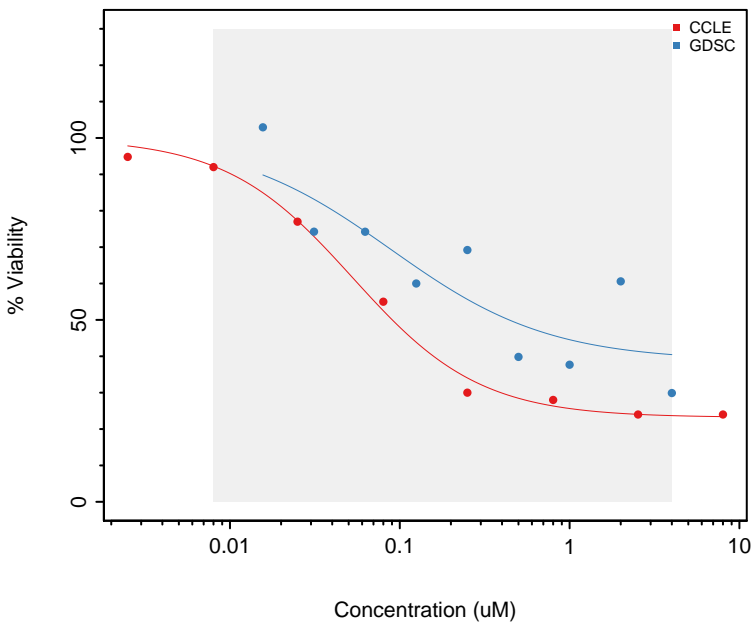

AZD6244:SK-MEL-5

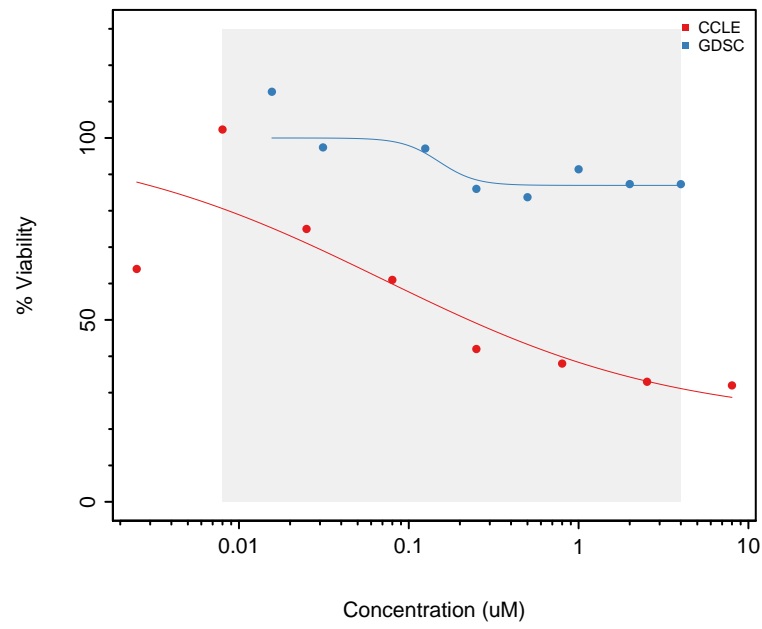

AZD6244:SK-MES-1

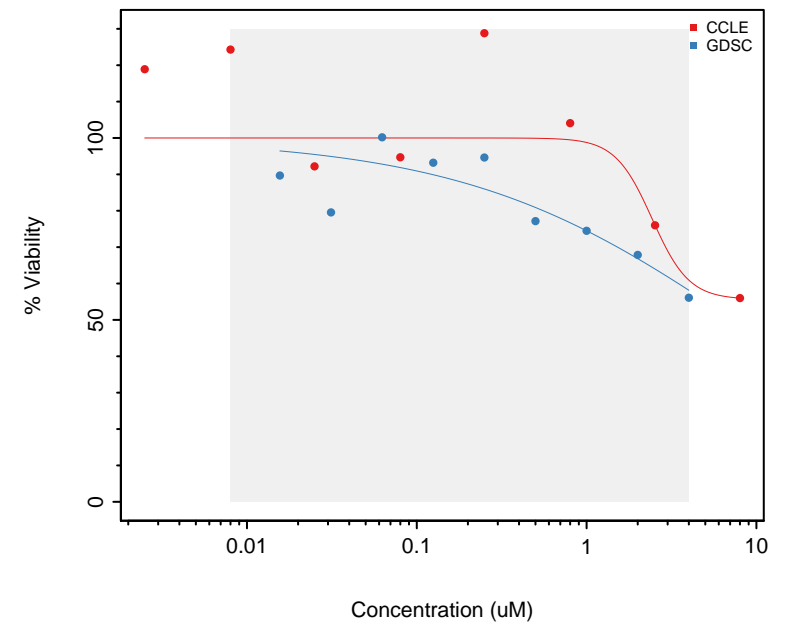

AZD6244:SK-MM-2

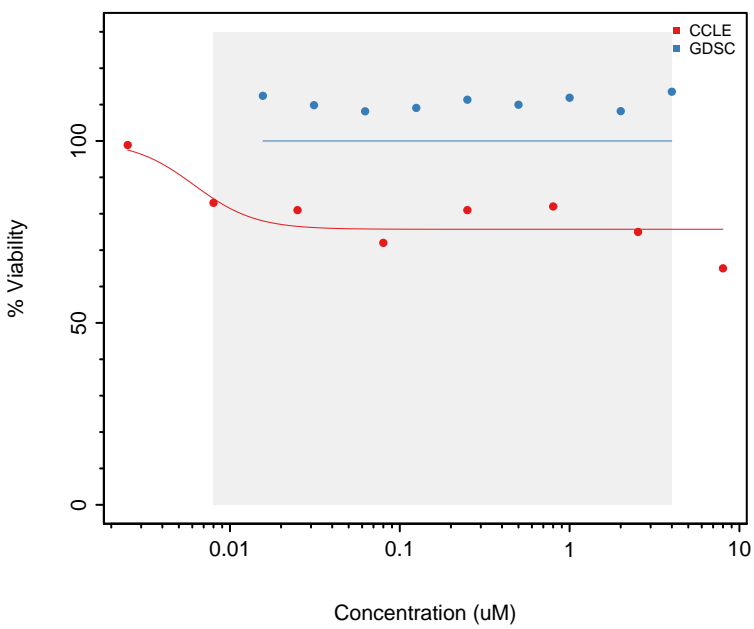

AZD6244:SK-N-AS

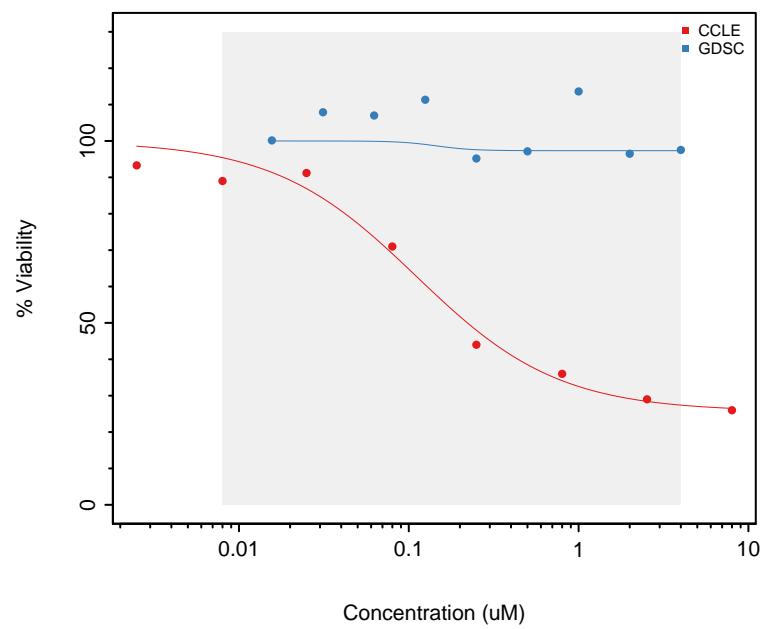

AZD6244:SK-N-DZ

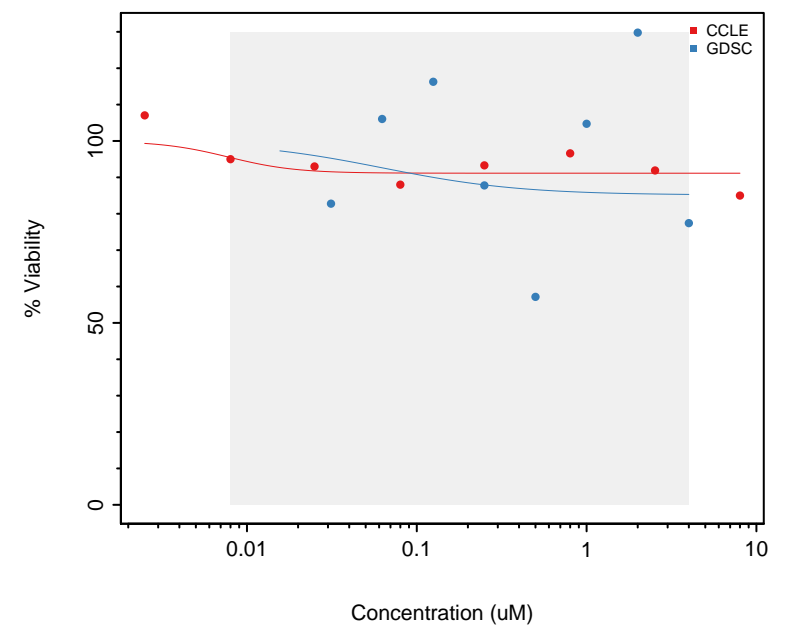

AZD6244:SK-OV-3

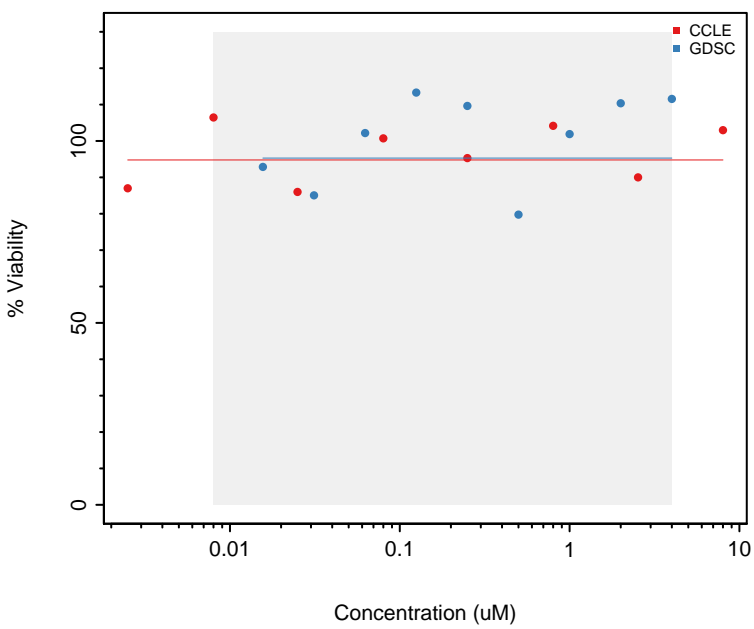

AZD6244:SNG-M

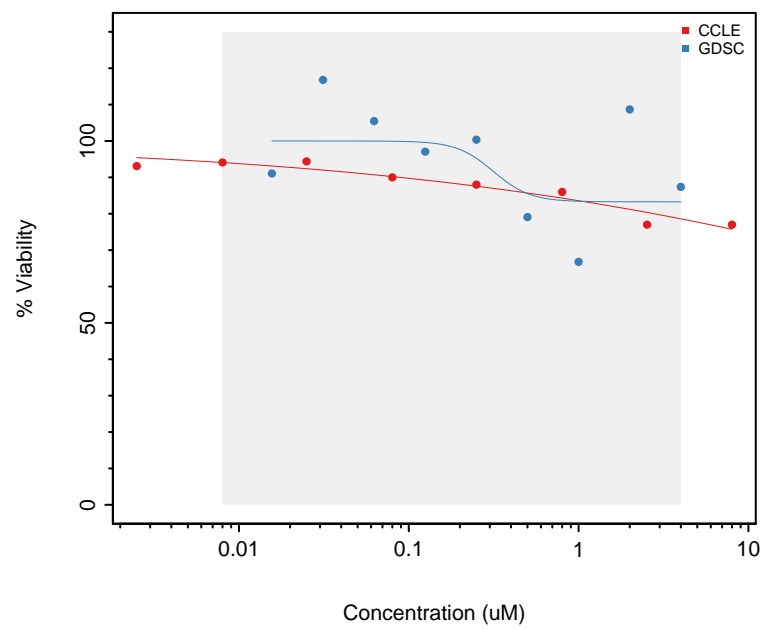

AZD6244:NCI-SNU-1

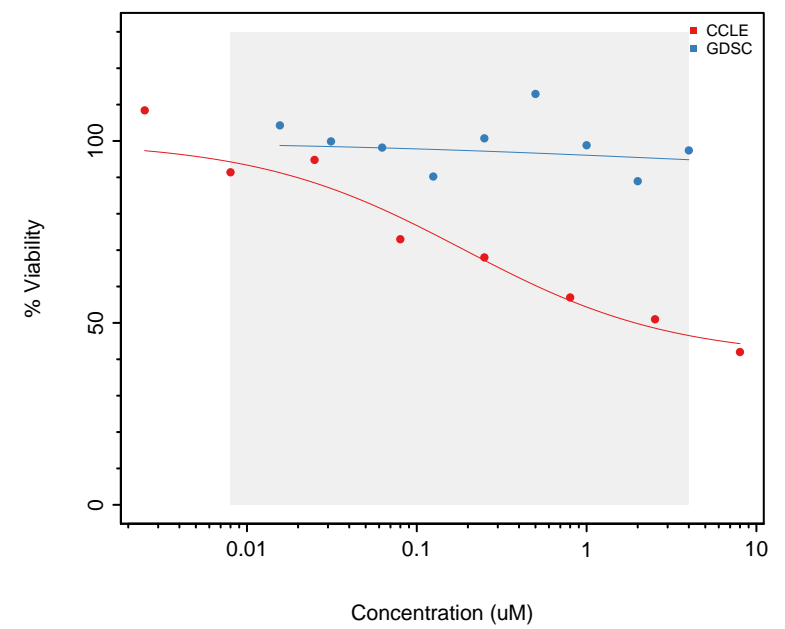

AZD6244:NCI-SNU-16

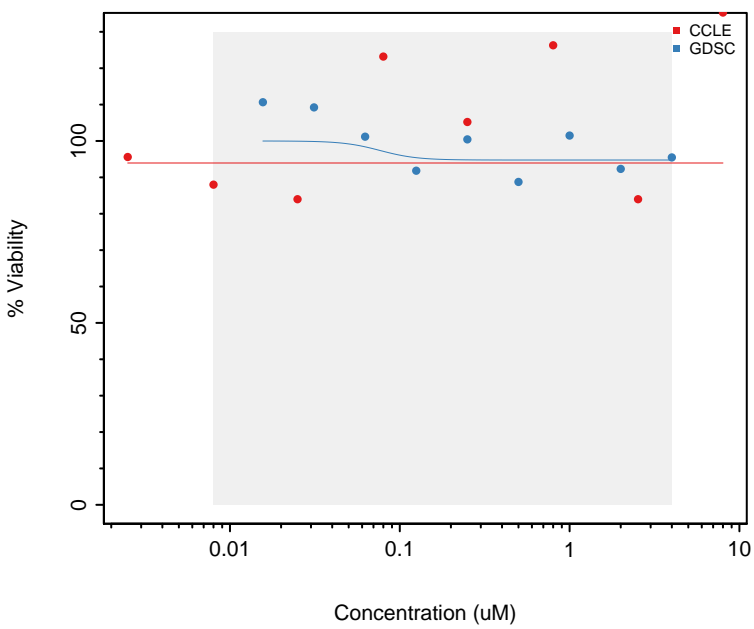

AZD6244:SNU-387

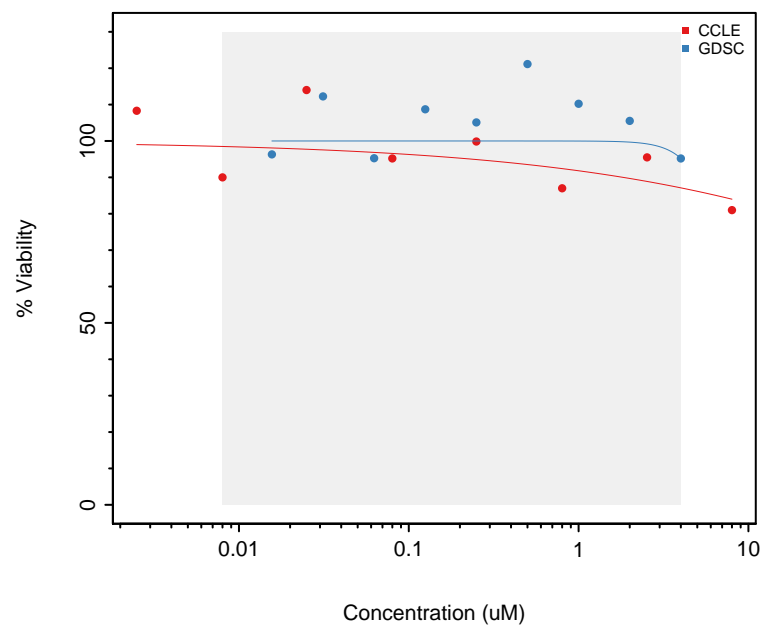

AZD6244:SNU-423

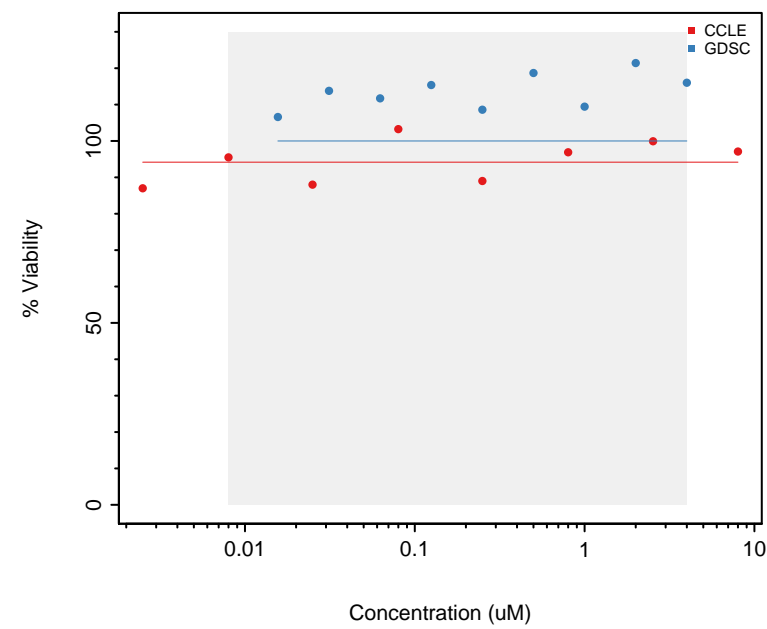

AZD6244:SNU-449

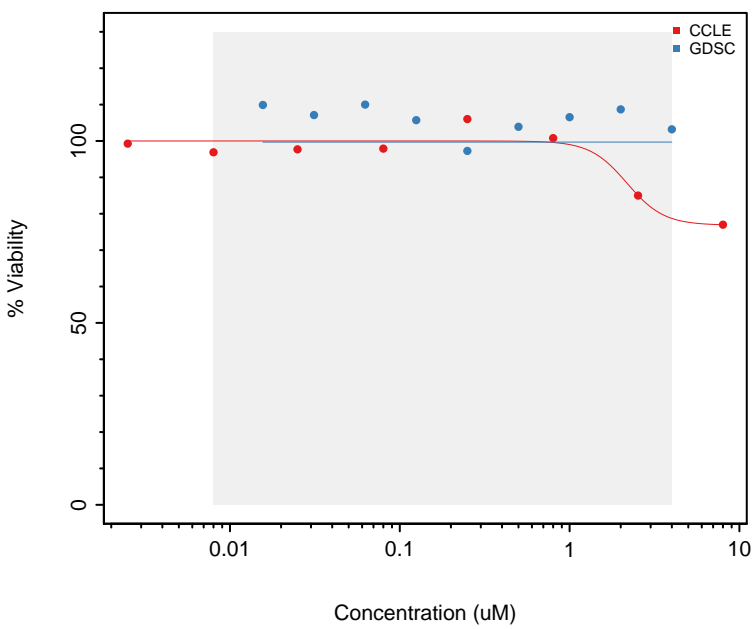

AZD6244:SNU-C2B

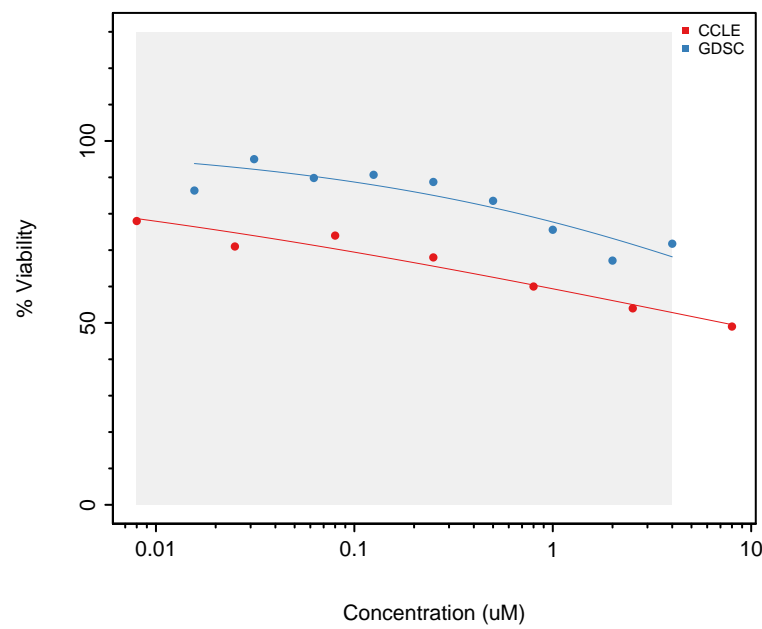

AZD6244:SUP-T1

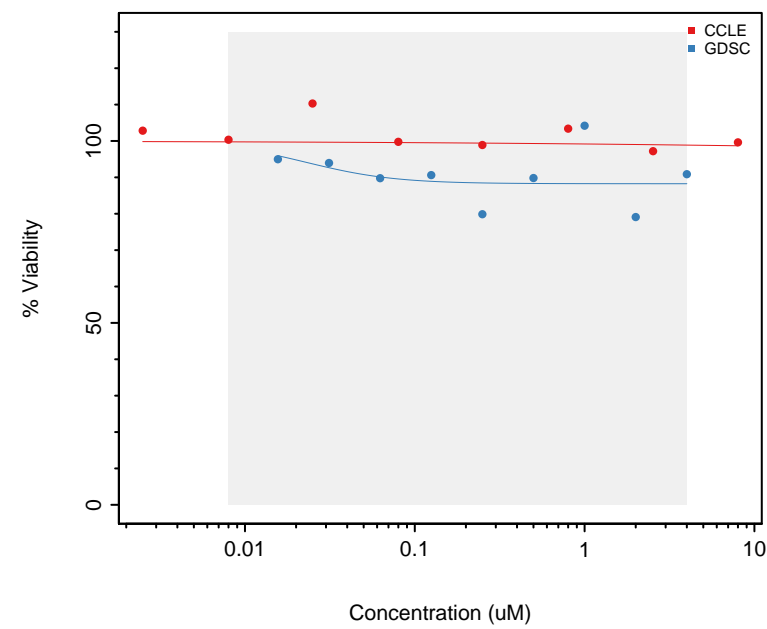

AZD6244:SW1088

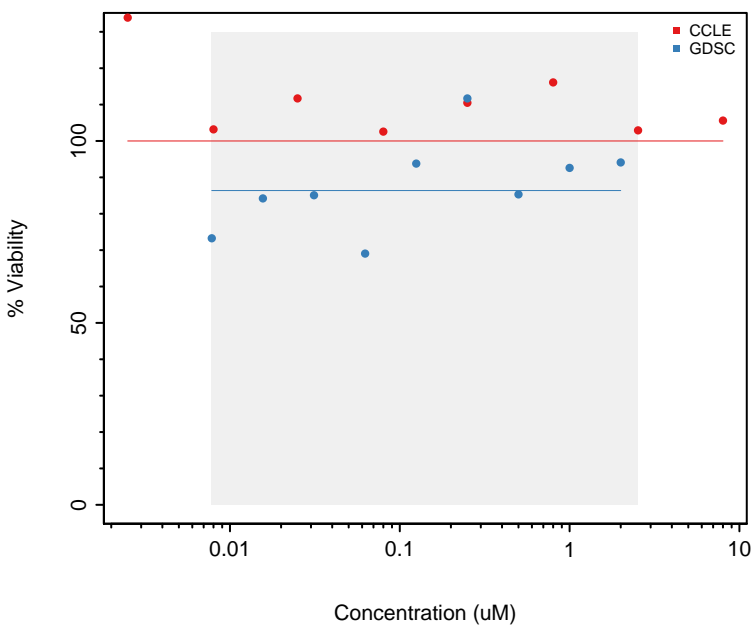

AZD6244:SW1417

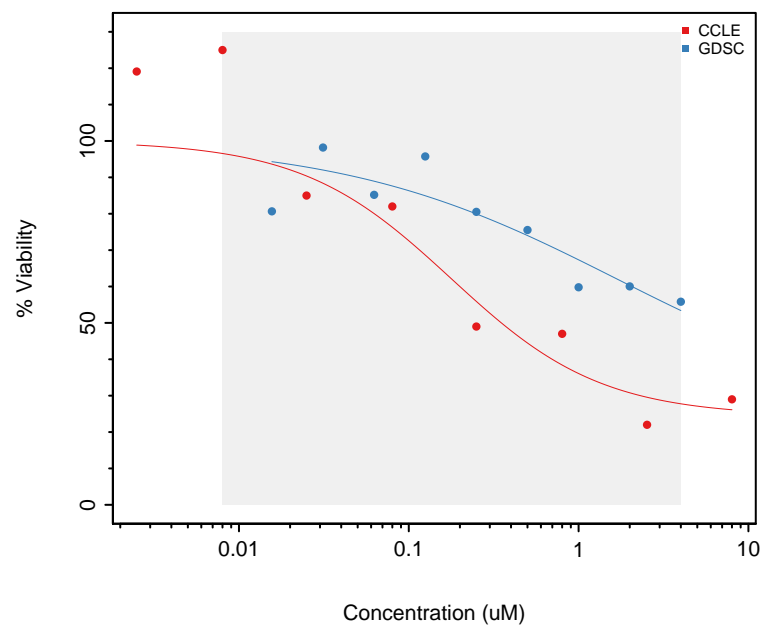

AZD6244:SW1573

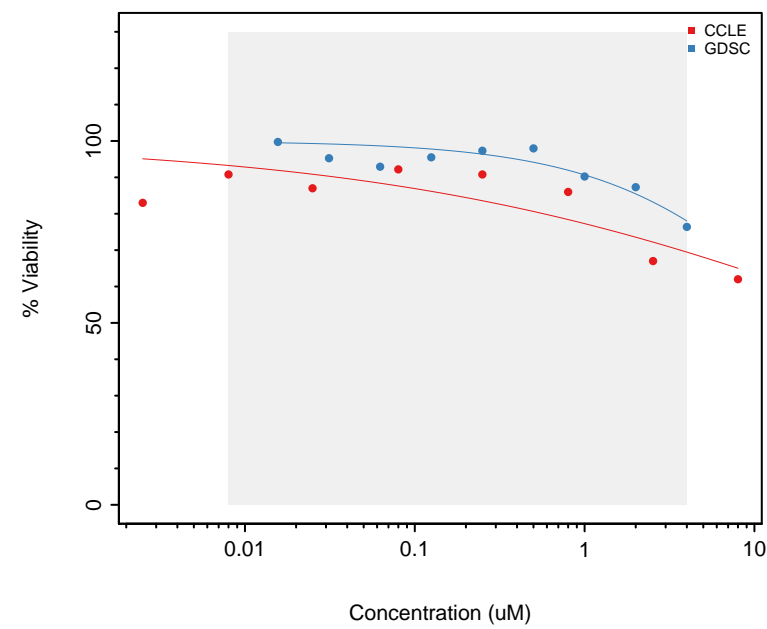

AZD6244:SW1990

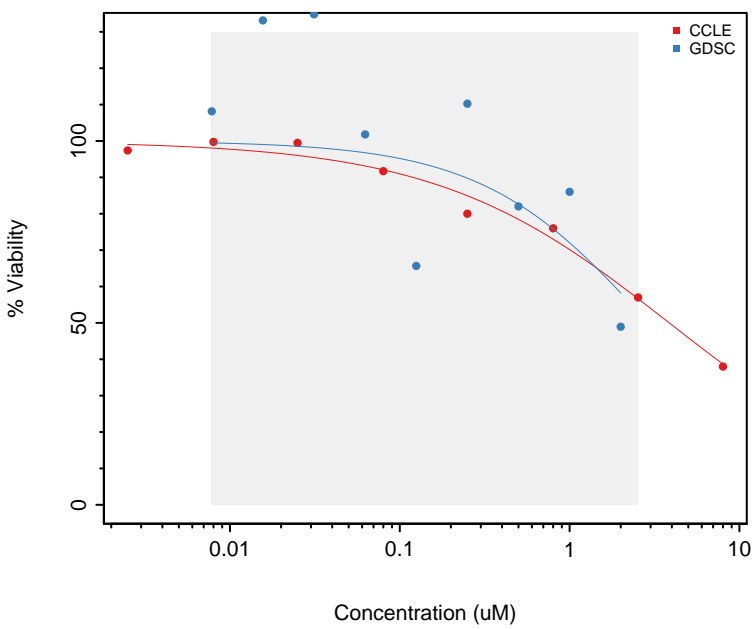

AZD6244:SW48

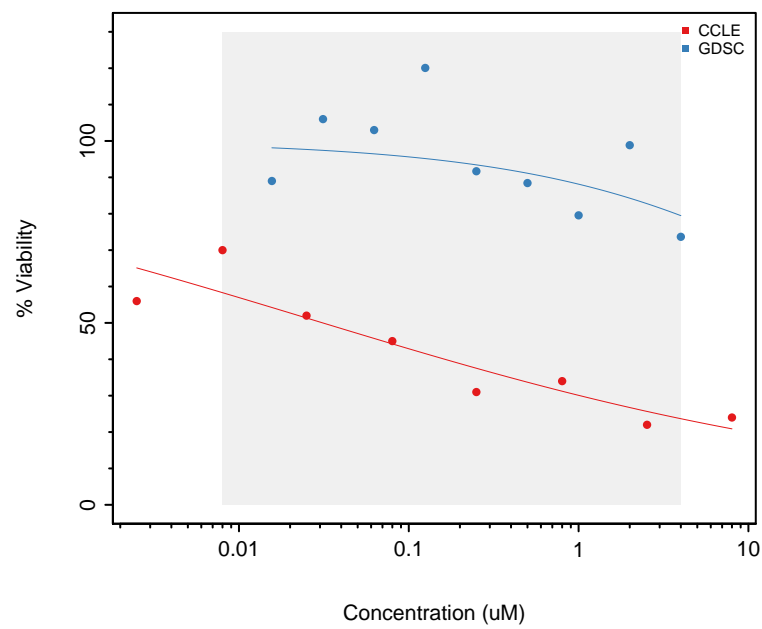

AZD6244:SW620

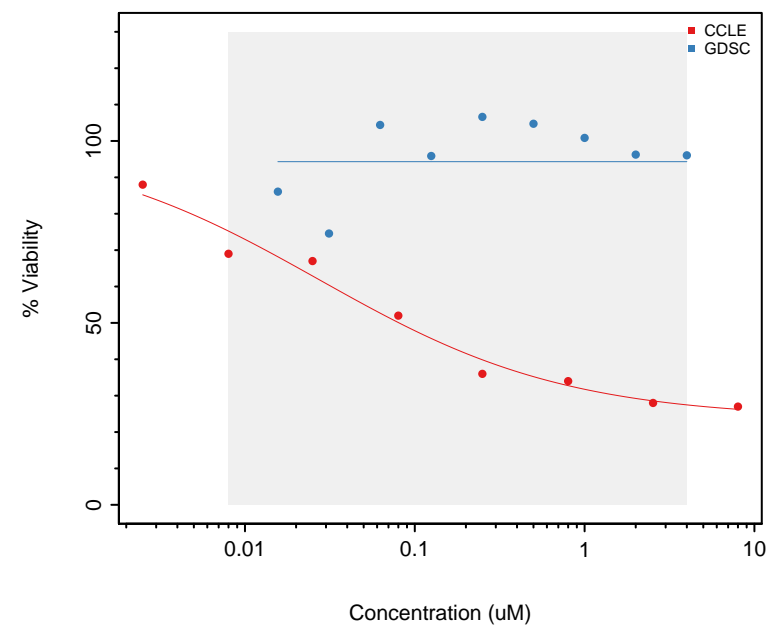

AZD6244:SW780

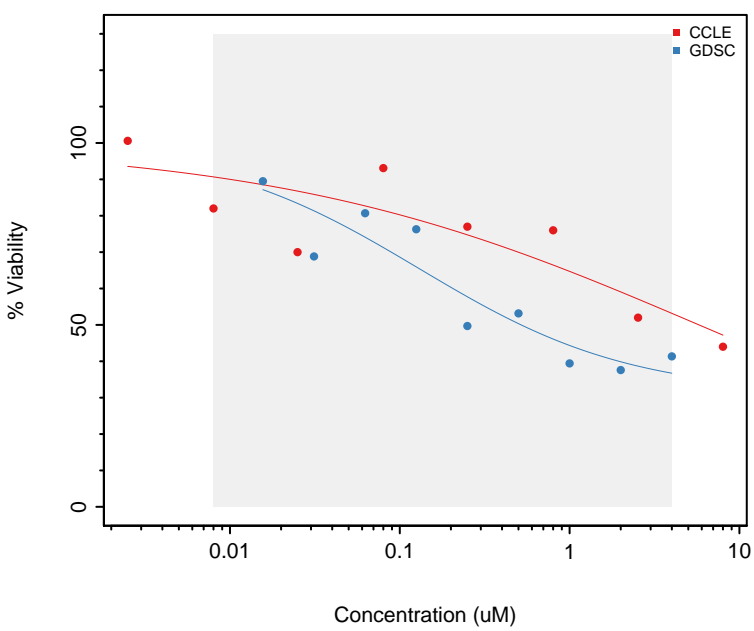

AZD6244:T47D

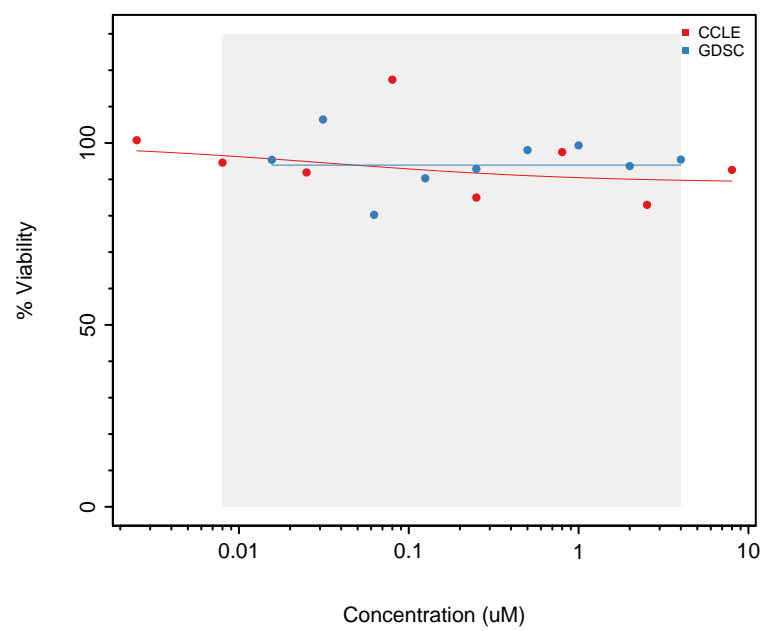

AZD6244:T84

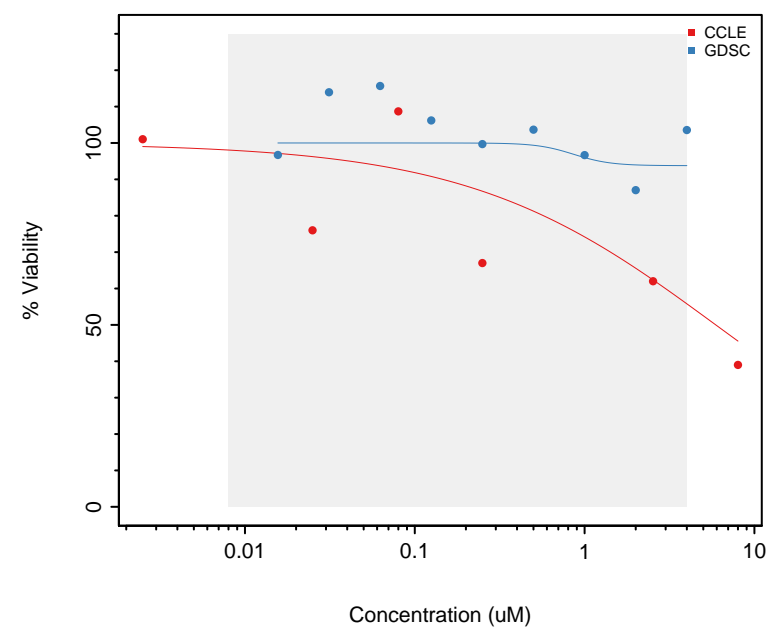

AZD6244:T98G

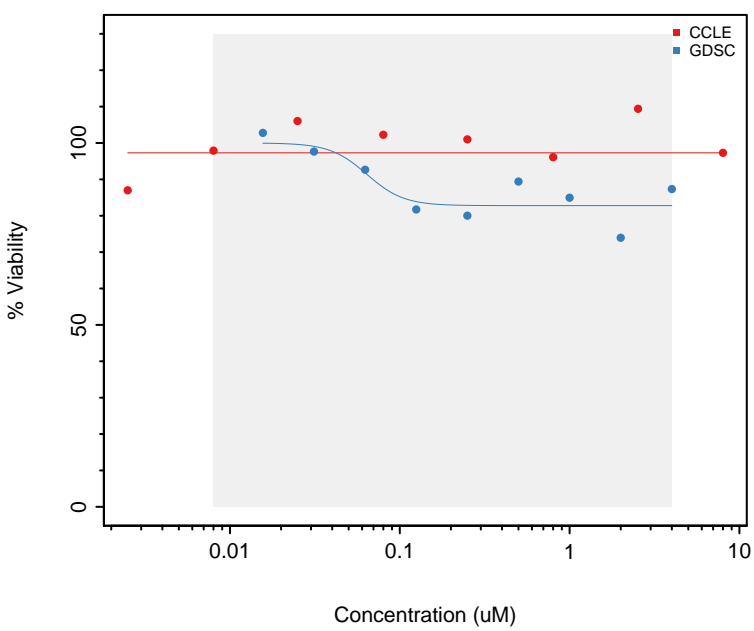

AZD6244:TCCSUP

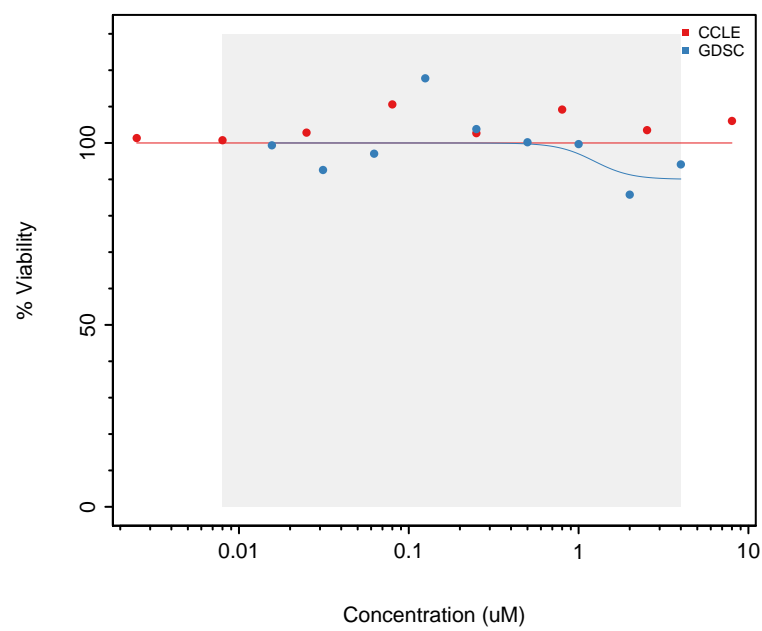

AZD6244:TE-1

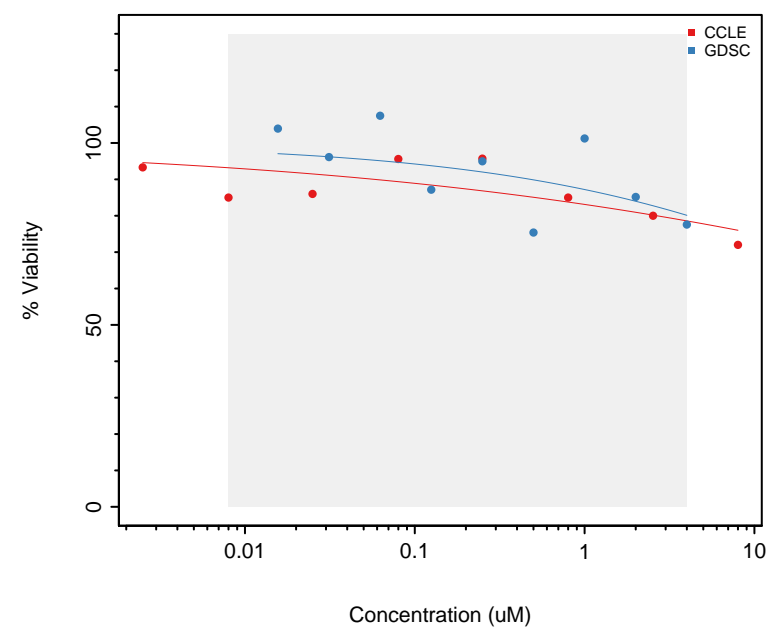

AZD6244:TE-11

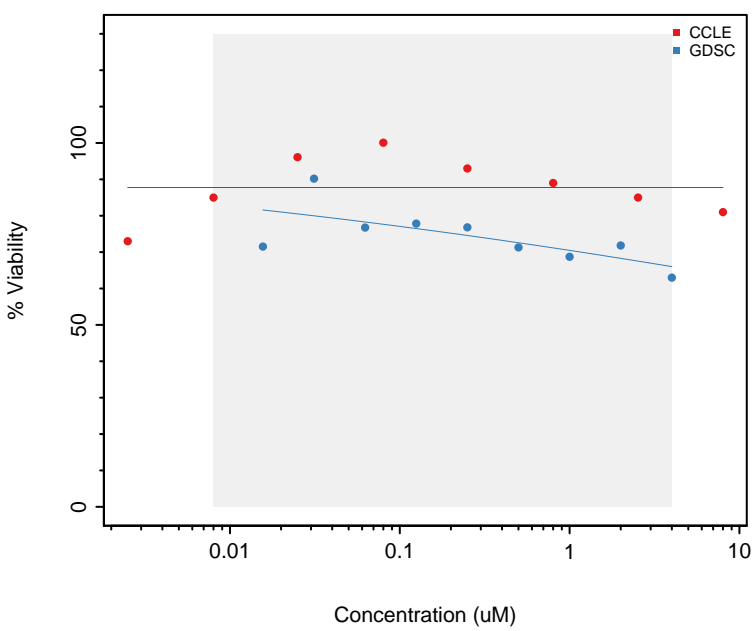

AZD6244:TE-15

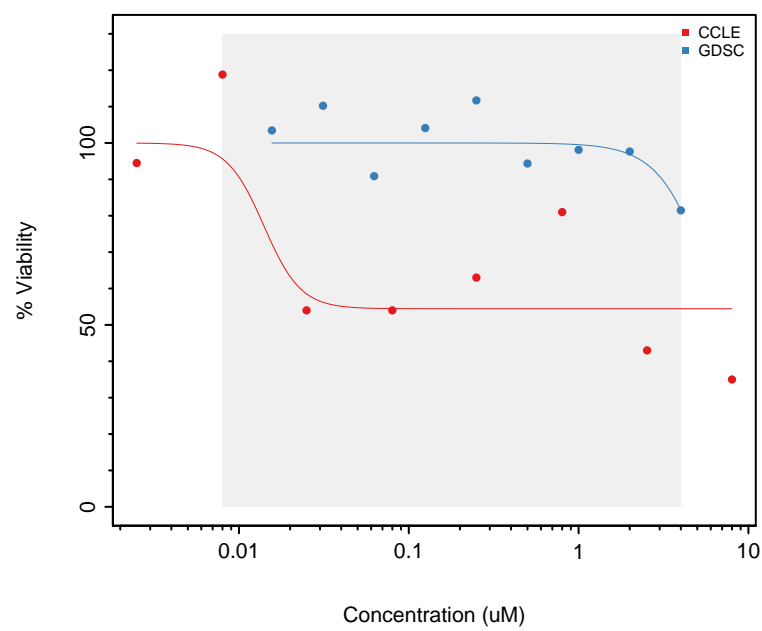

AZD6244:TE-5

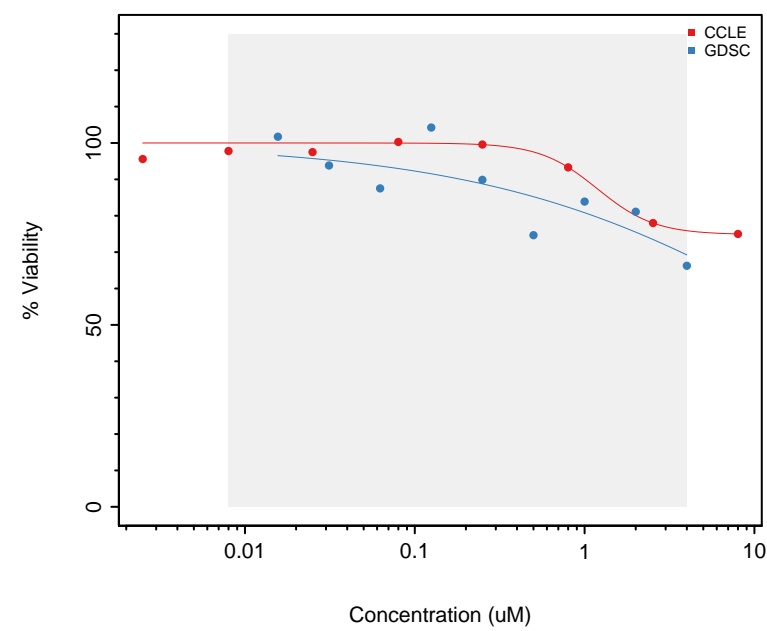

AZD6244:TYK-nu

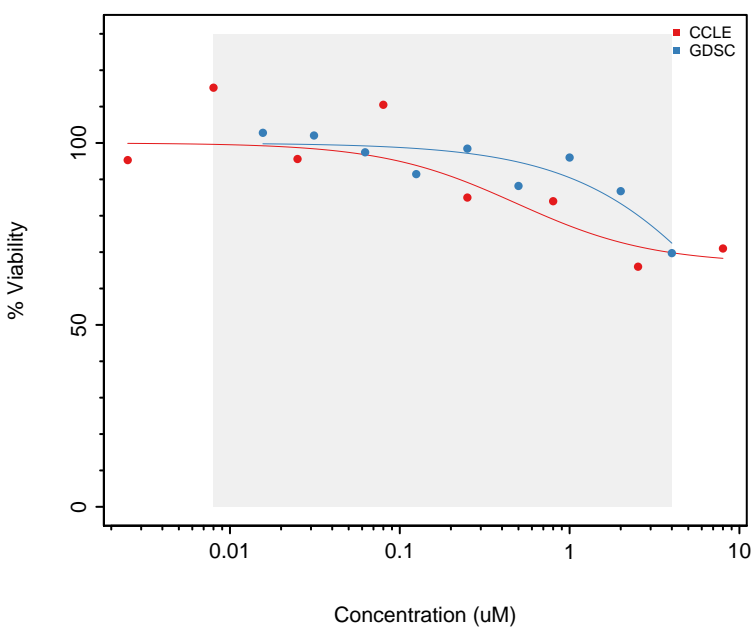

AZD6244:U-118-MG

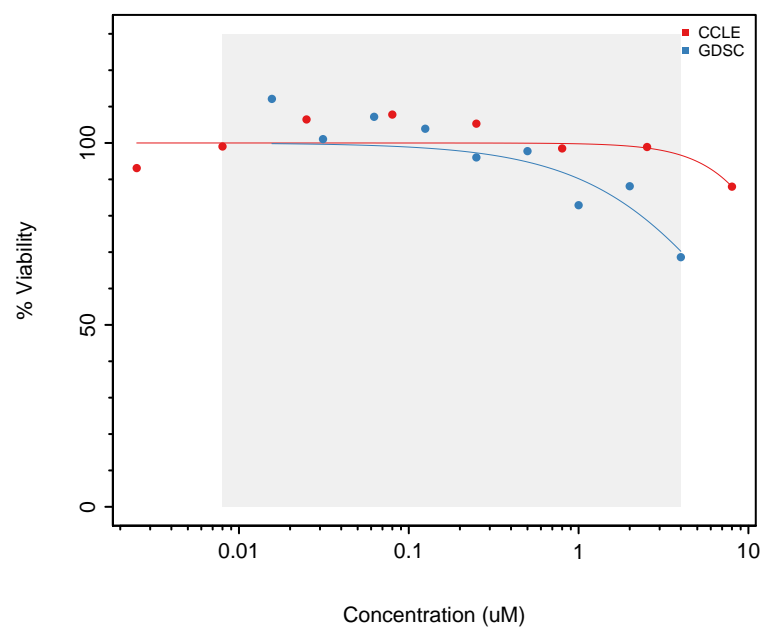

AZD6244:U-2-OS

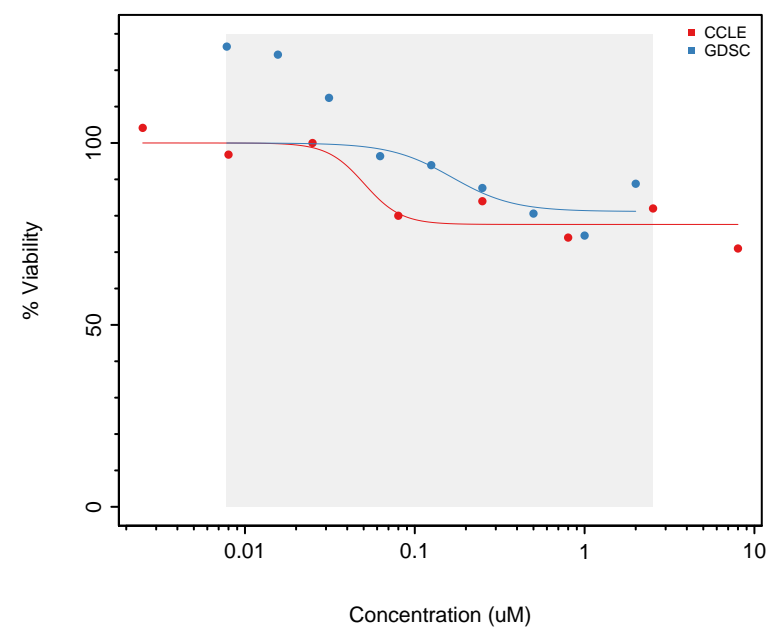

AZD6244:U-87-MG

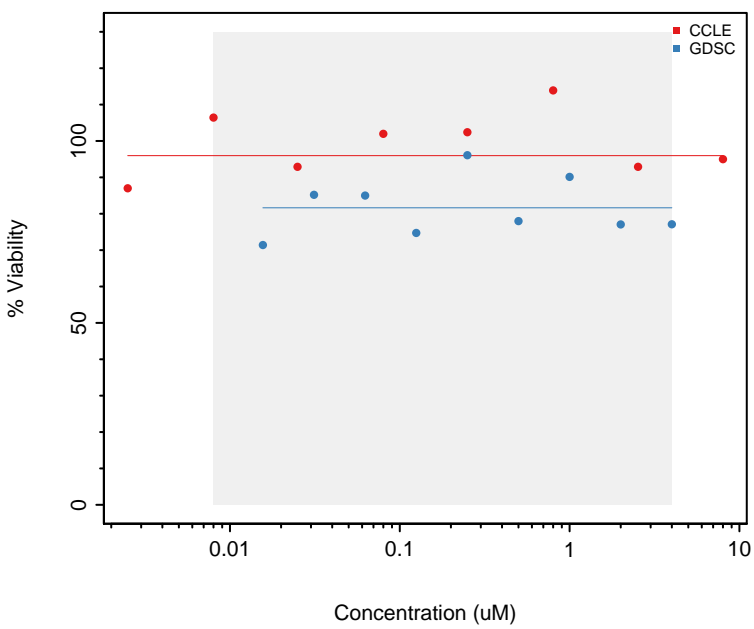

AZD6244:UACC-257

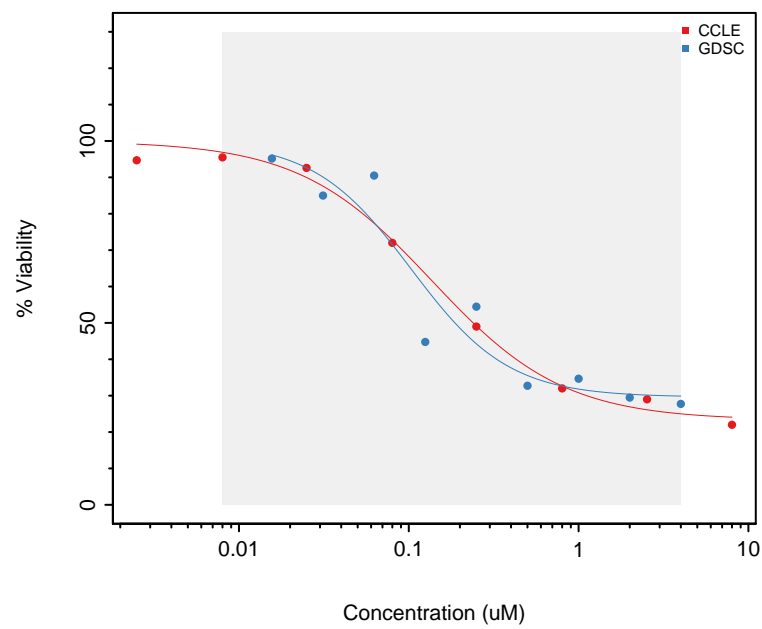

AZD6244:UACC-62

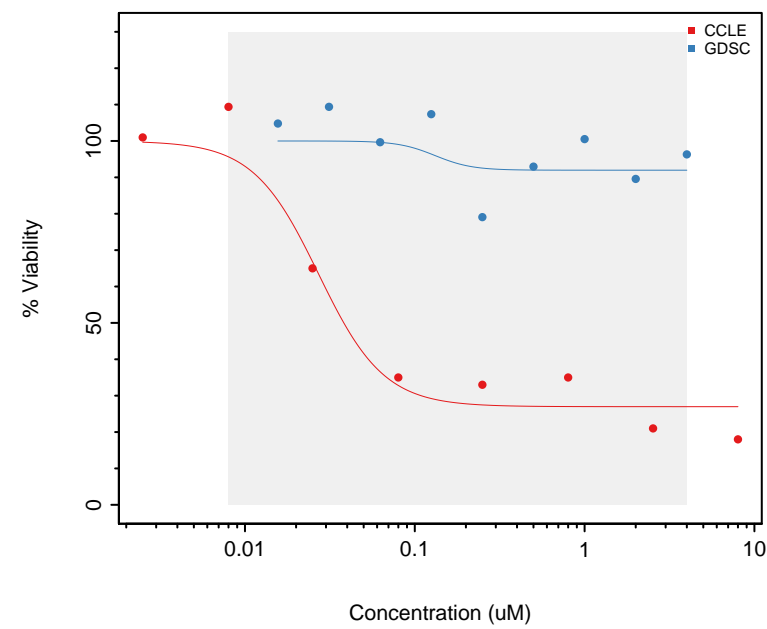

AZD6244:VMRC-RCZ

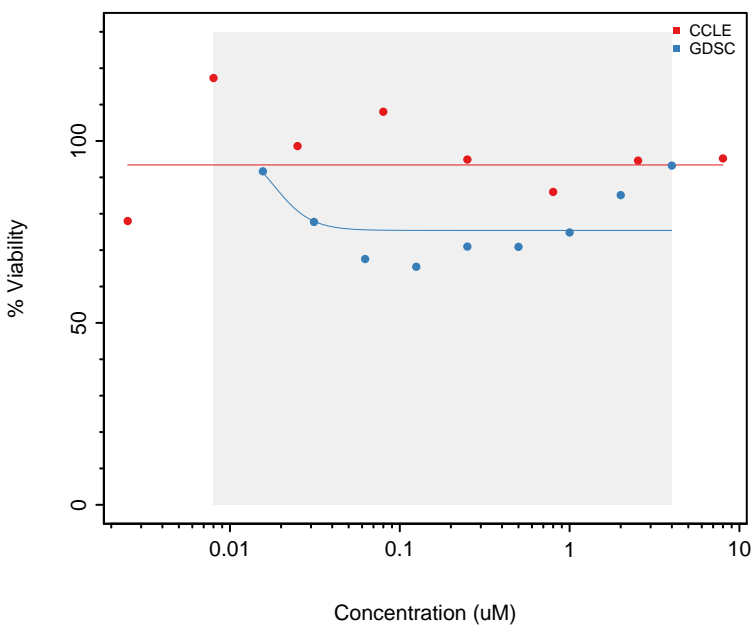

AZD6244:WM-115

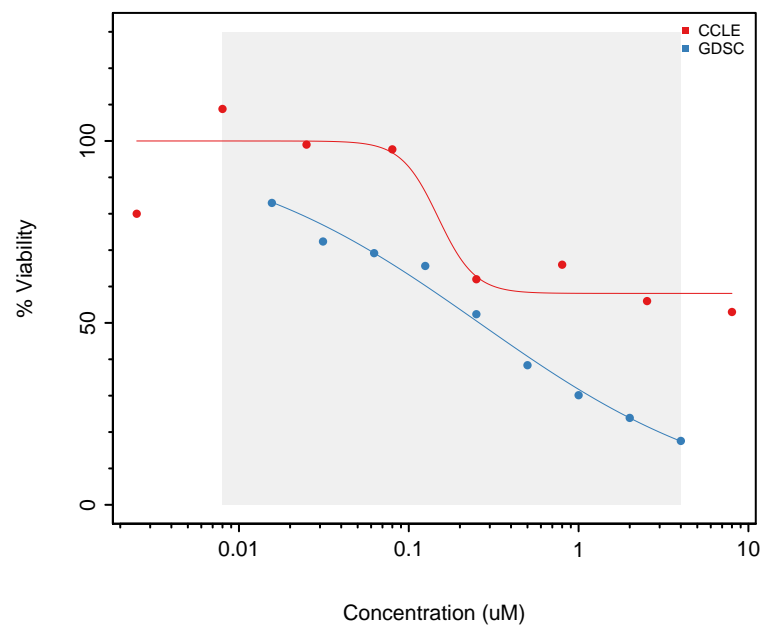

AZD6244:YKG-1

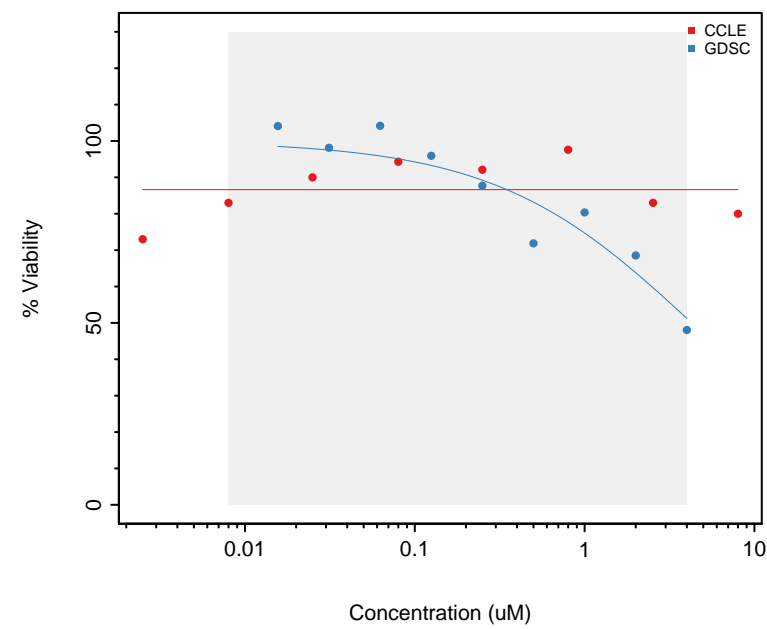

AZD6244:ZR-75-30

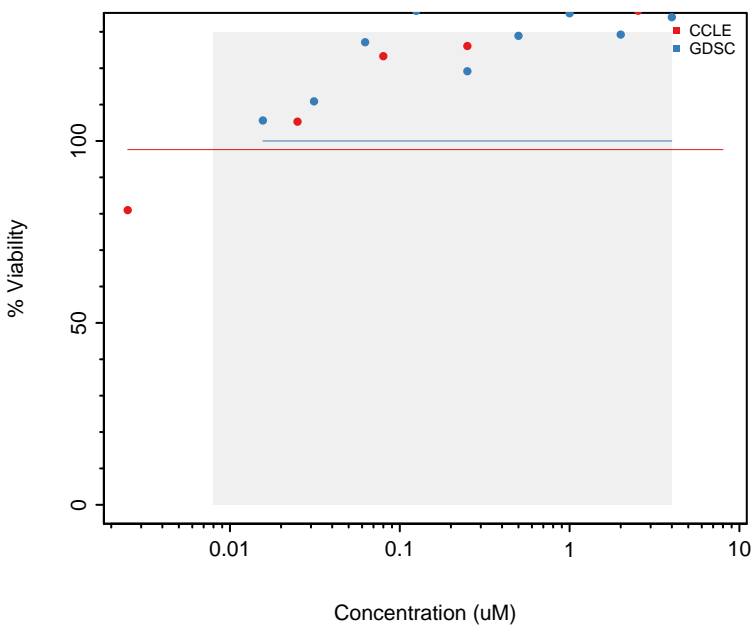

PLX4720:22RV1

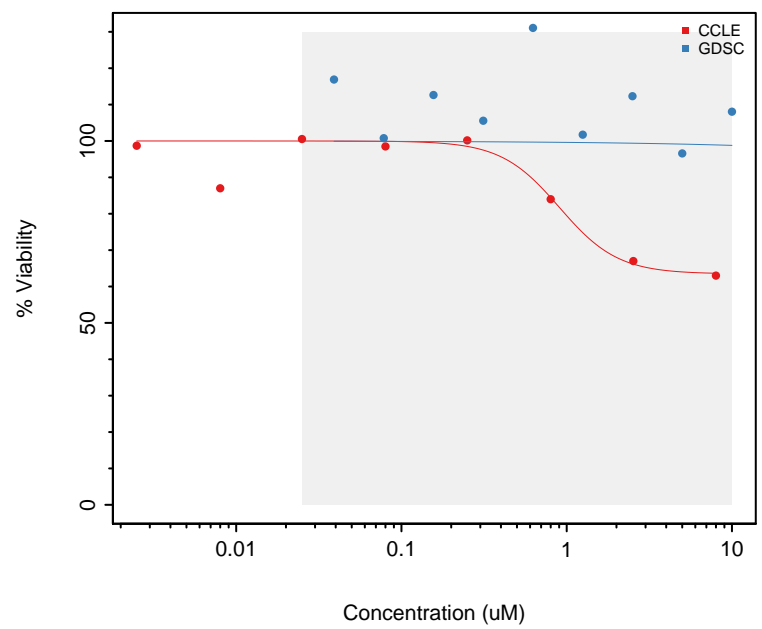

PLX4720:5637

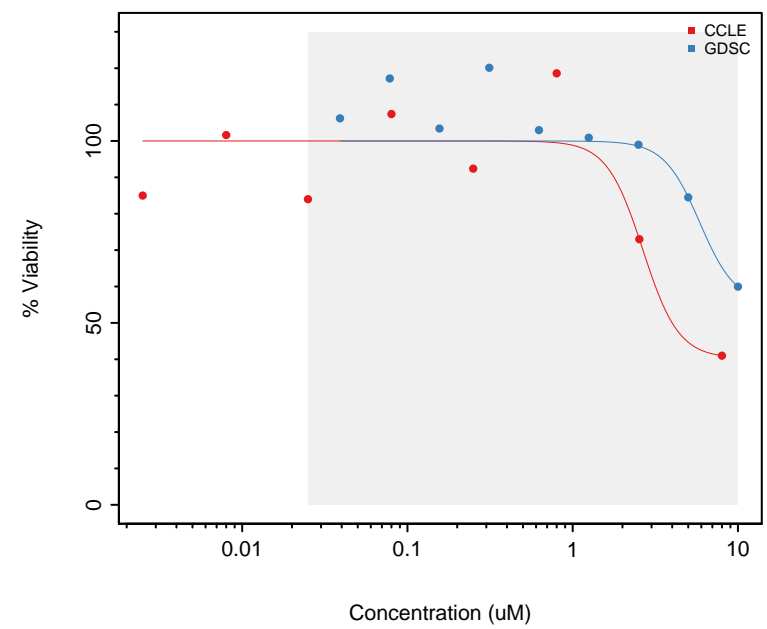

PLX4720:639-V

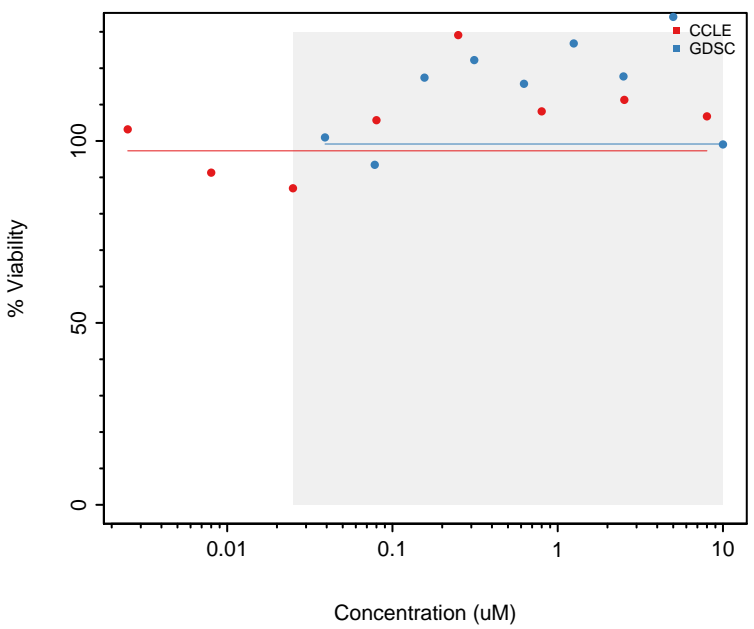

PLX4720:697

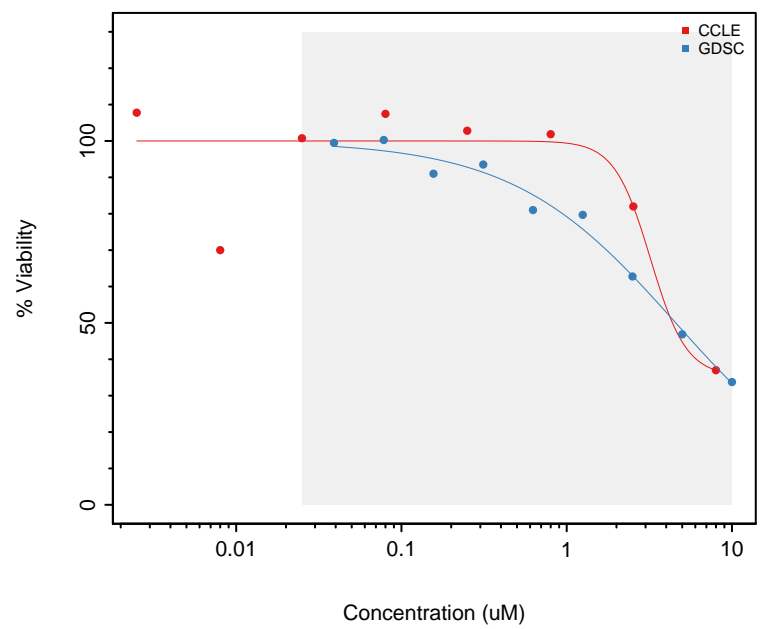

PLX4720:769-P

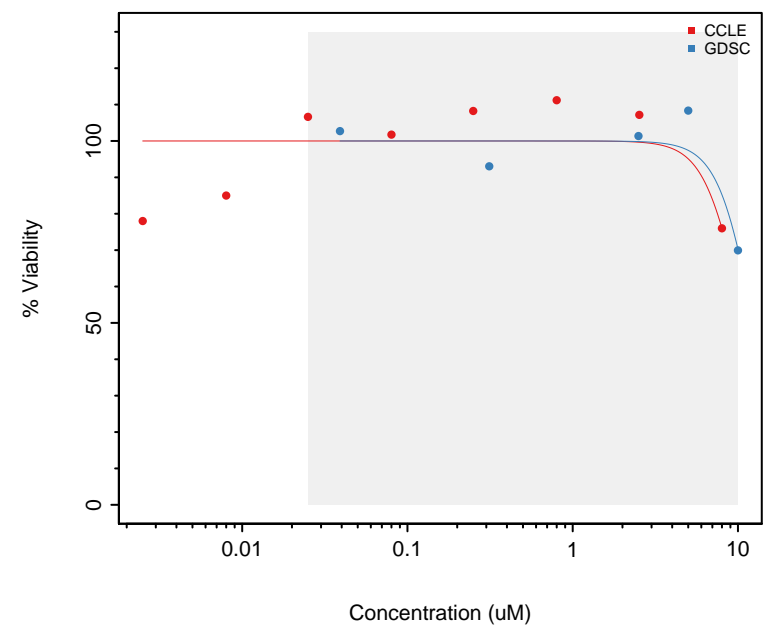

PLX4720:8305C

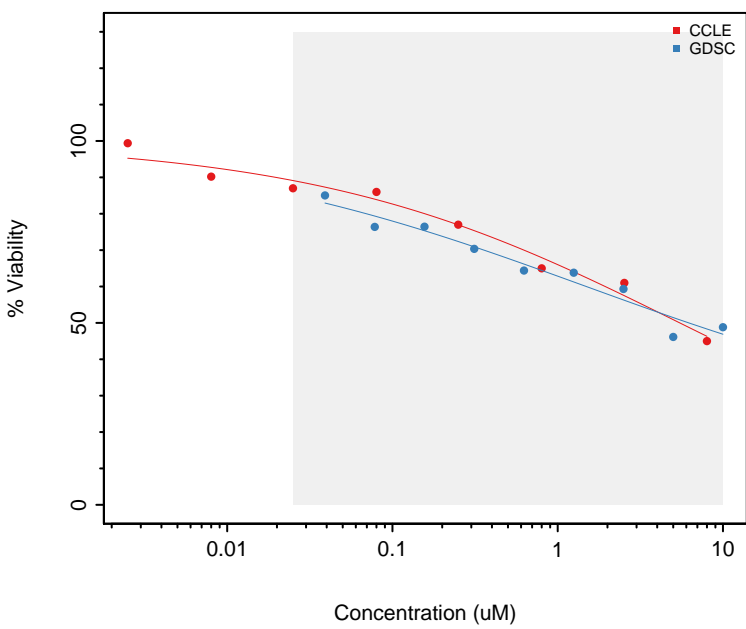

PLX4720:8505C

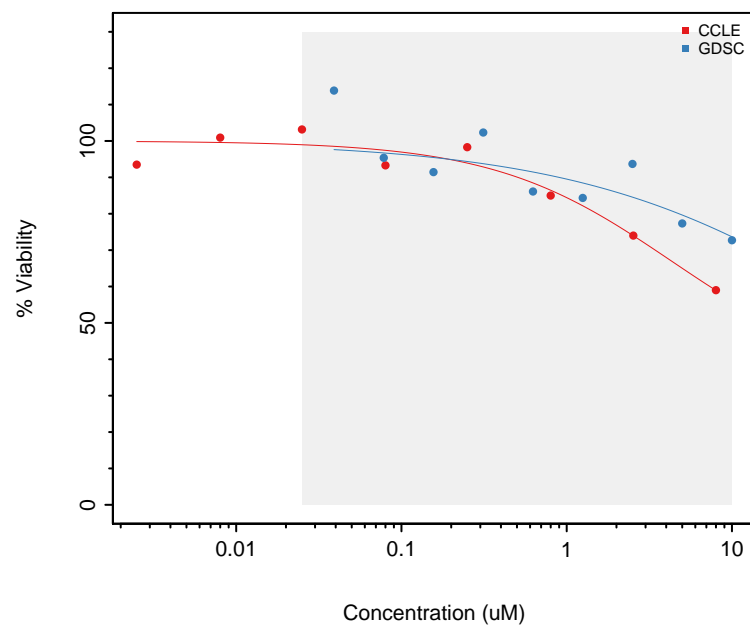

PLX4720:8-MG-BA

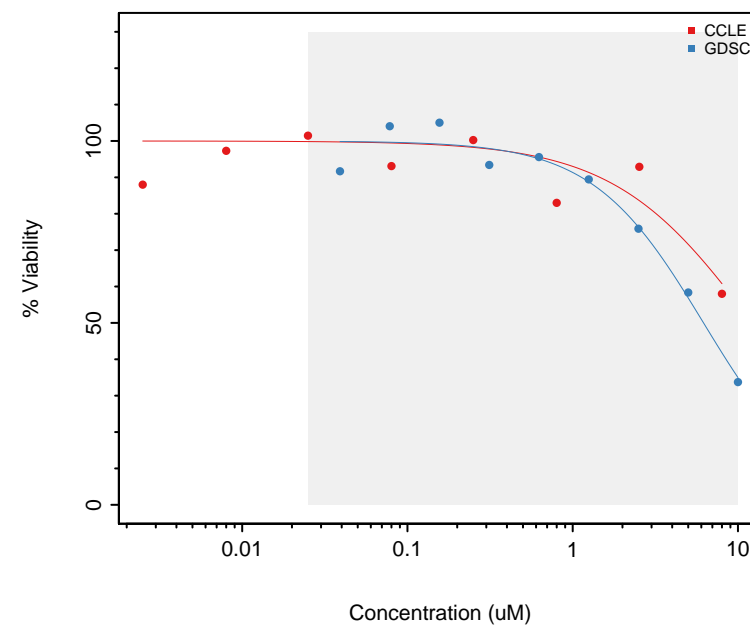

PLX4720:A172

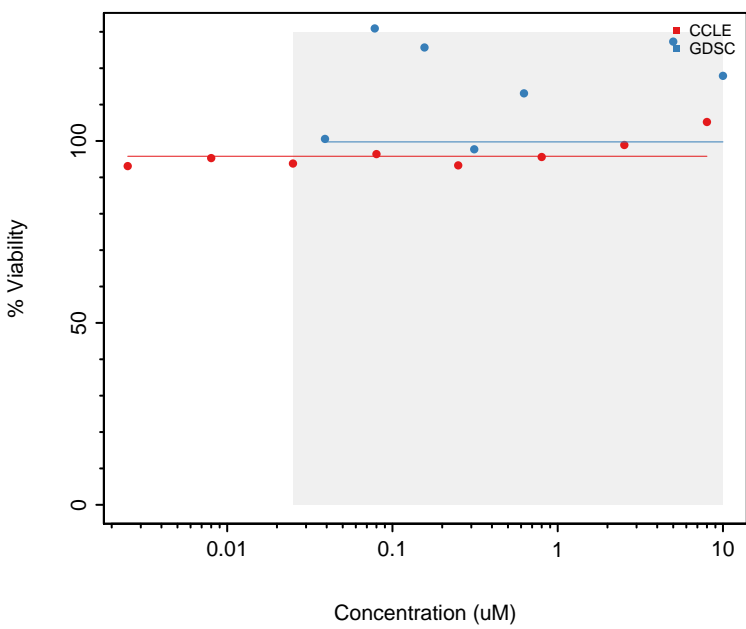

PLX4720:A204

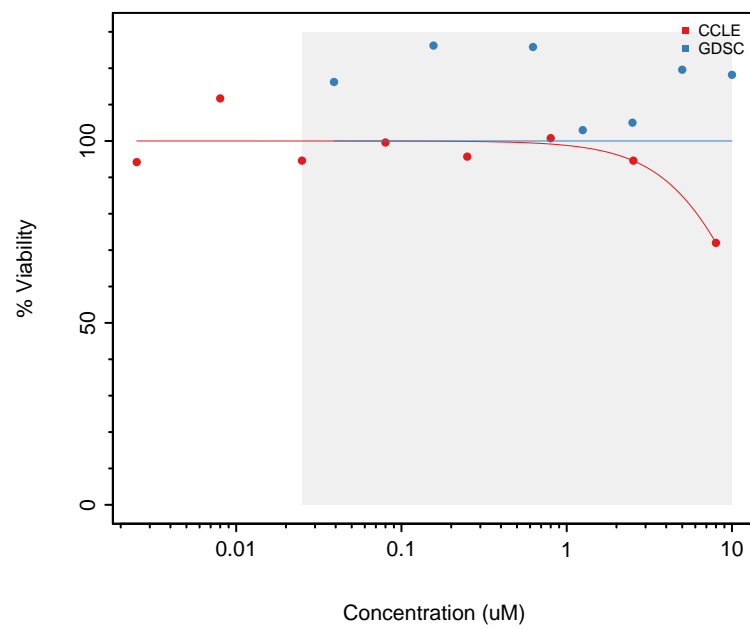

PLX4720:A2058

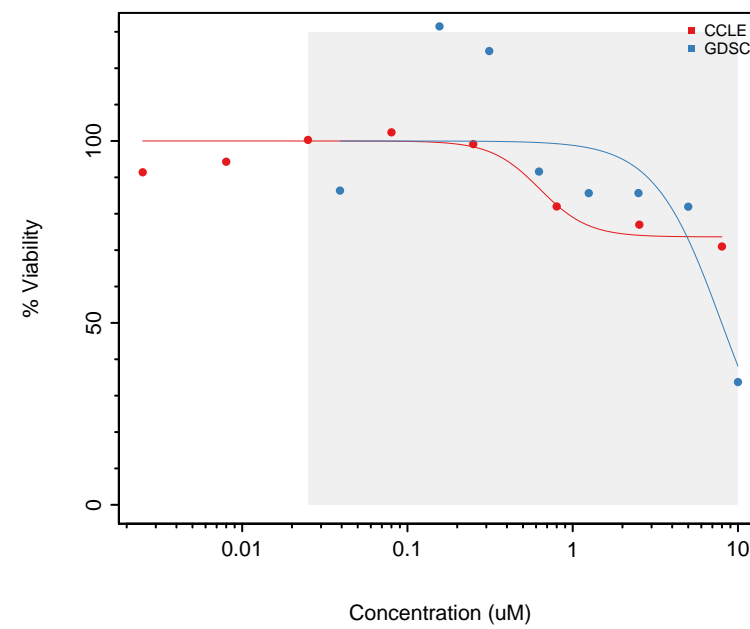

PLX4720:A253

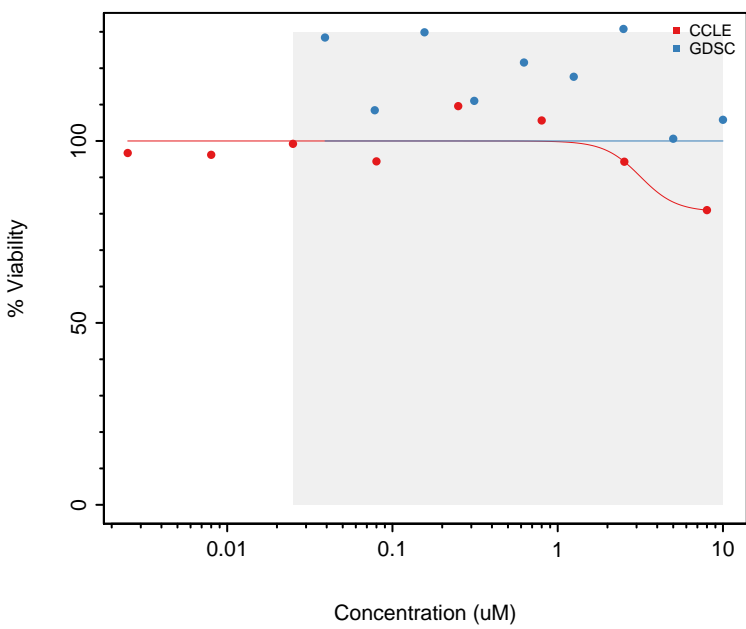

PLX4720:A2780

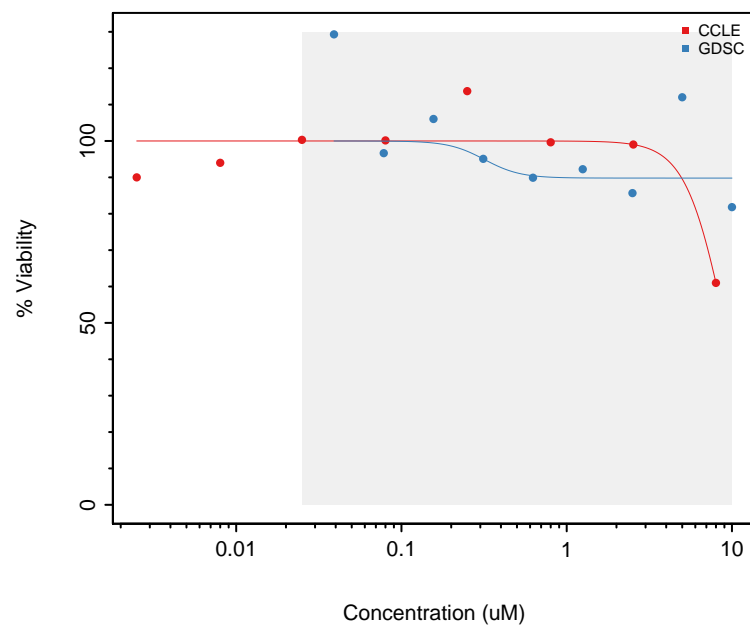

PLX4720:A375

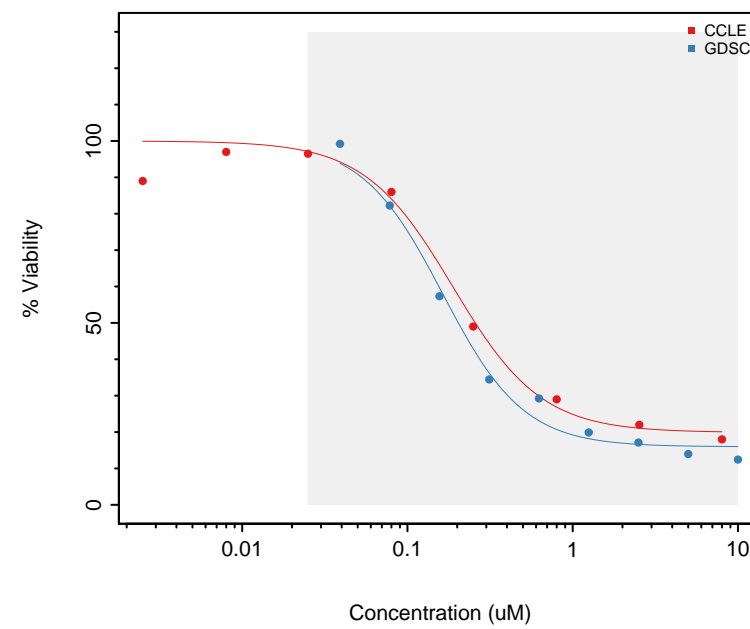

PLX4720:A549

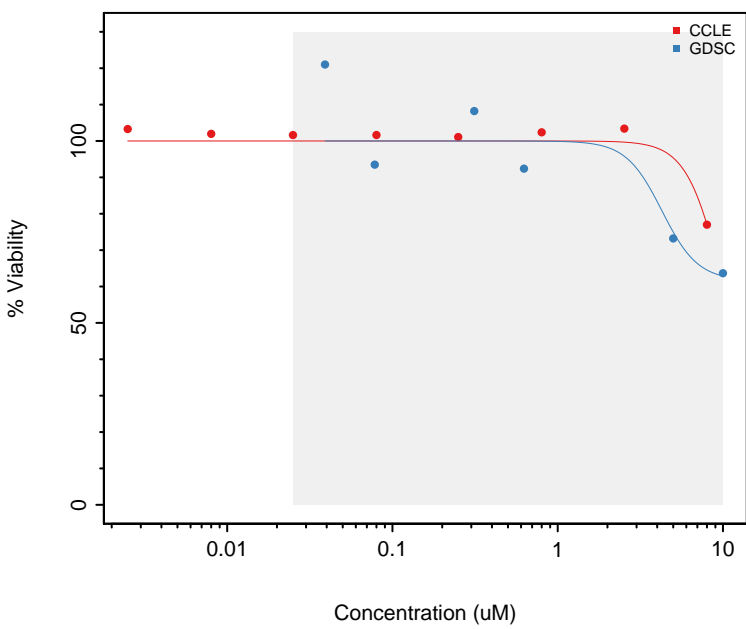

PLX4720:AsPC-1

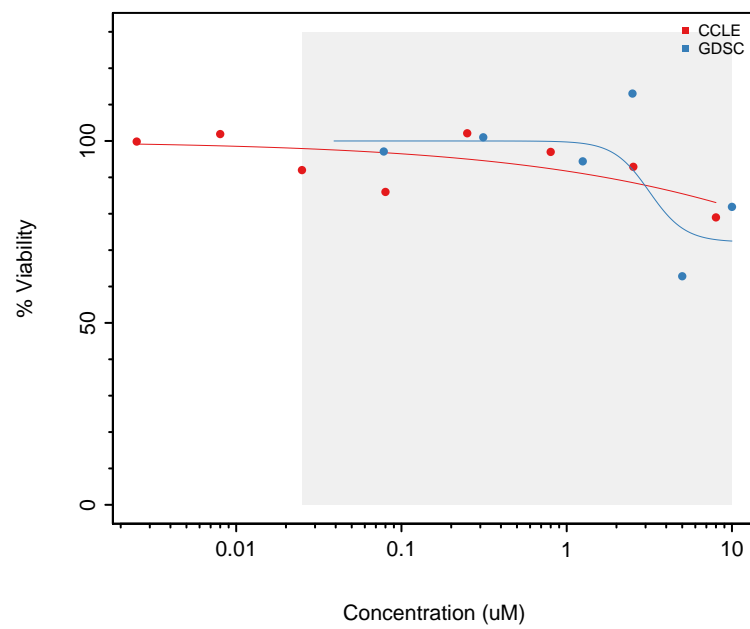

PLX4720:AU565

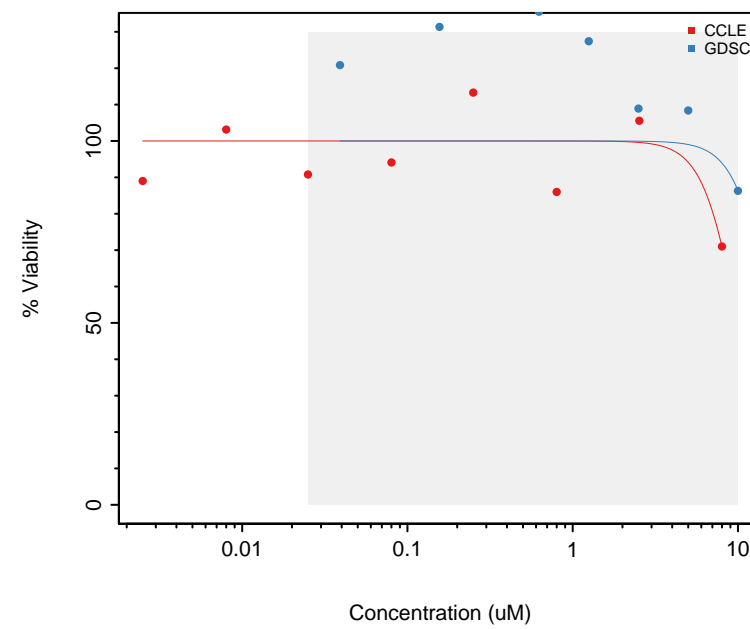

PLX4720:BCPAP

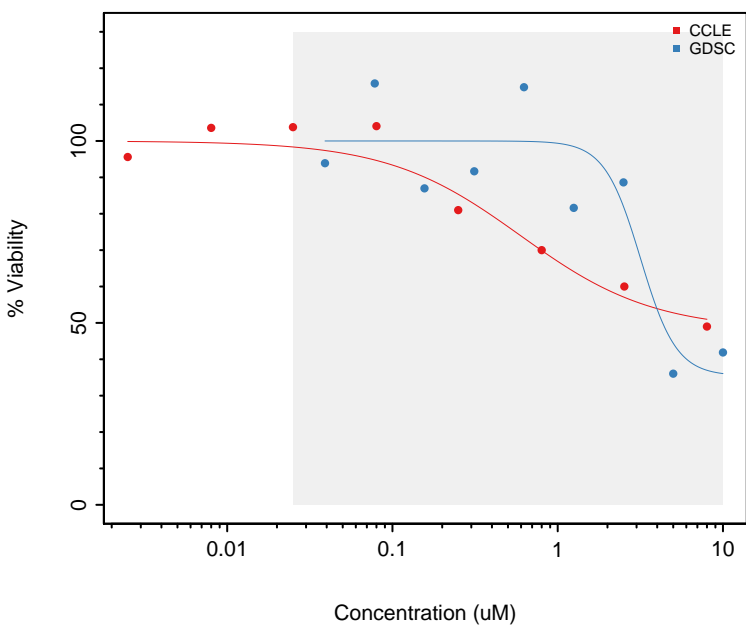

PLX4720:BFTC-909

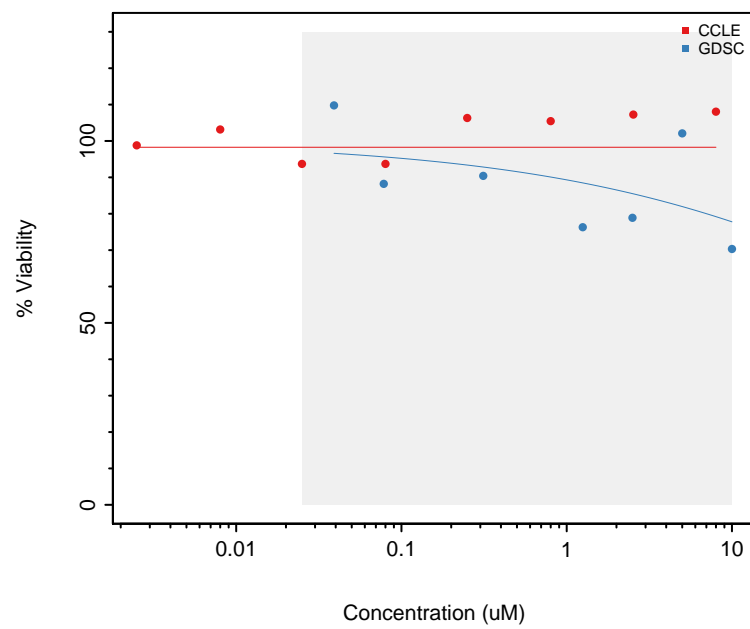

PLX4720:BL-41

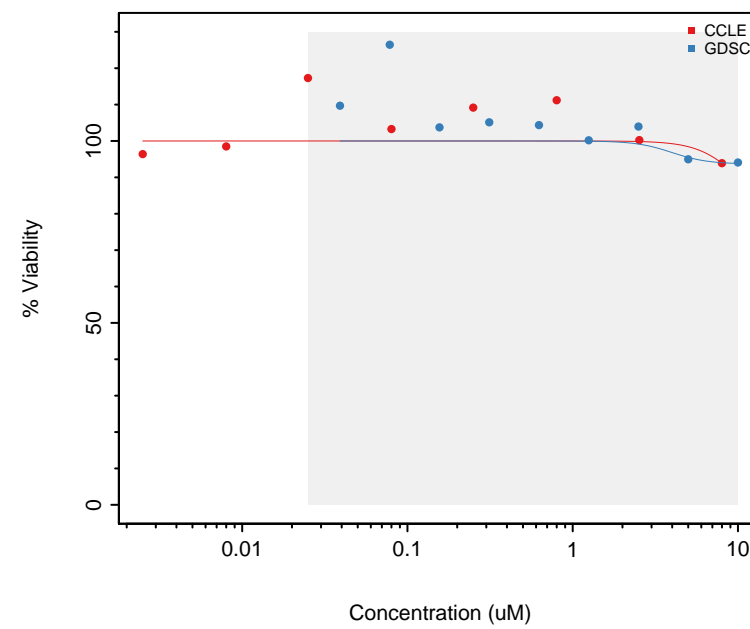

PLX4720:BT-20

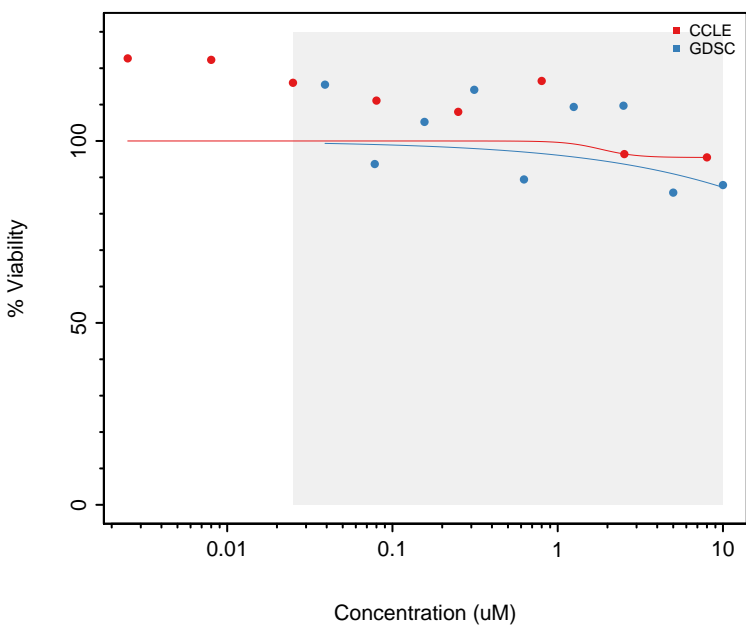

PLX4720:BT-474

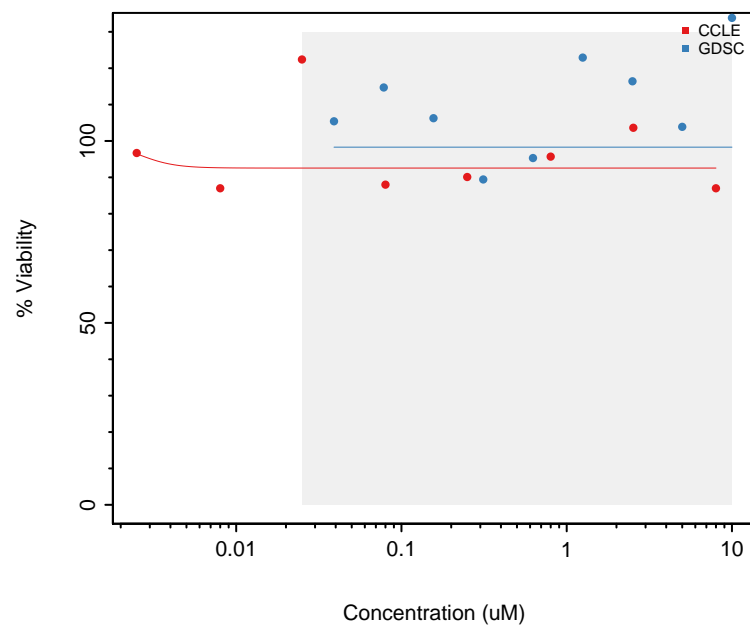

PLX4720:BT-549

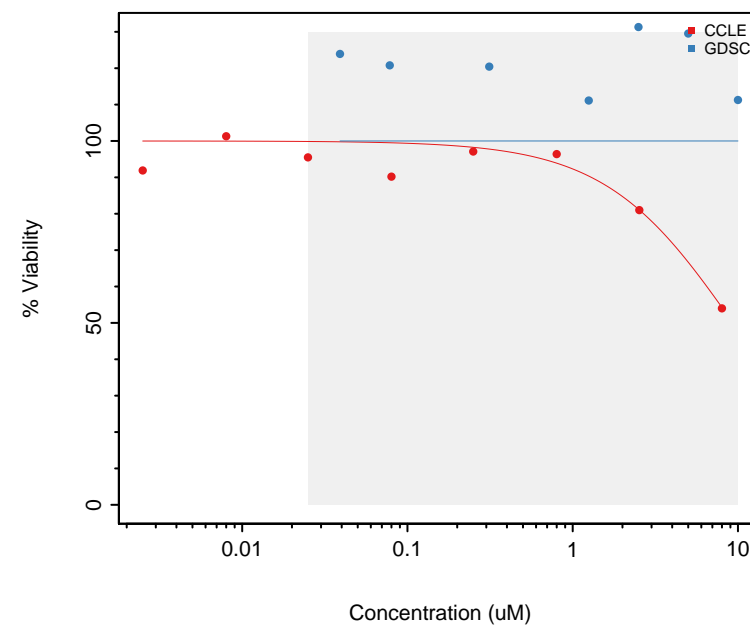

PLX4720:BxPC-3

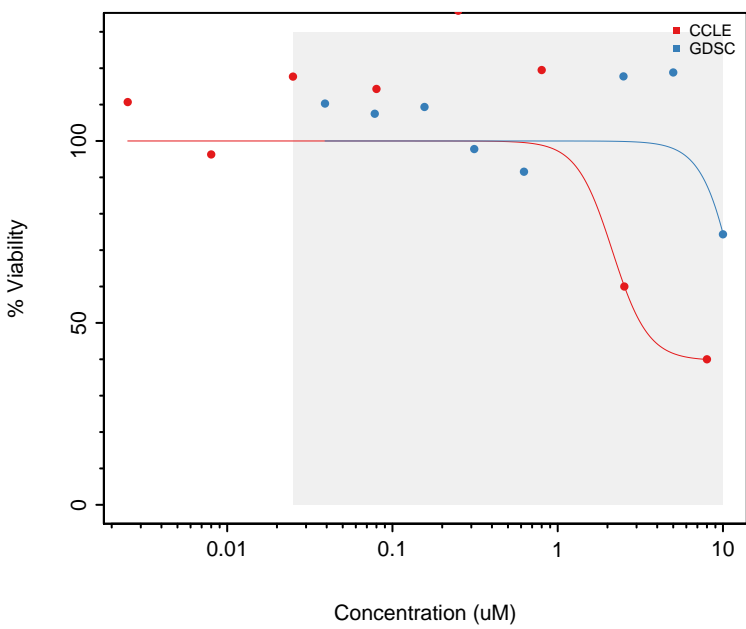

PLX4720:C2BBe1

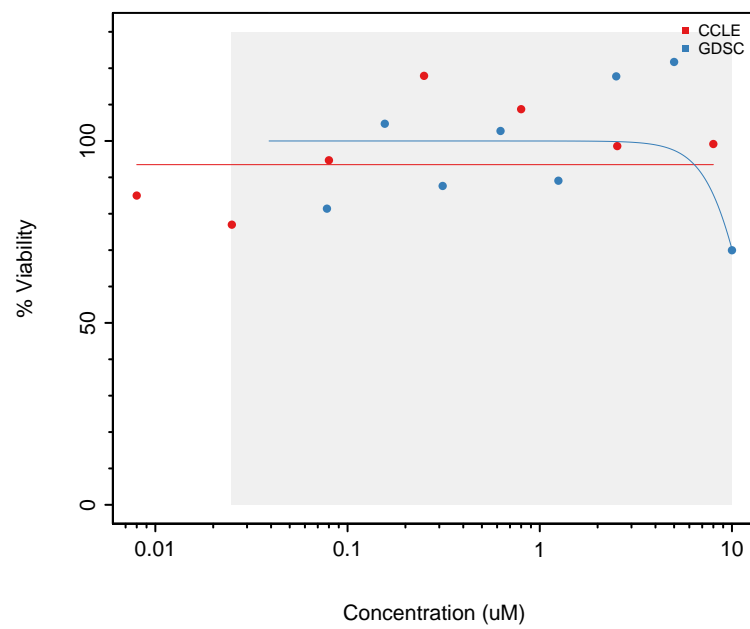

PLX4720:C32

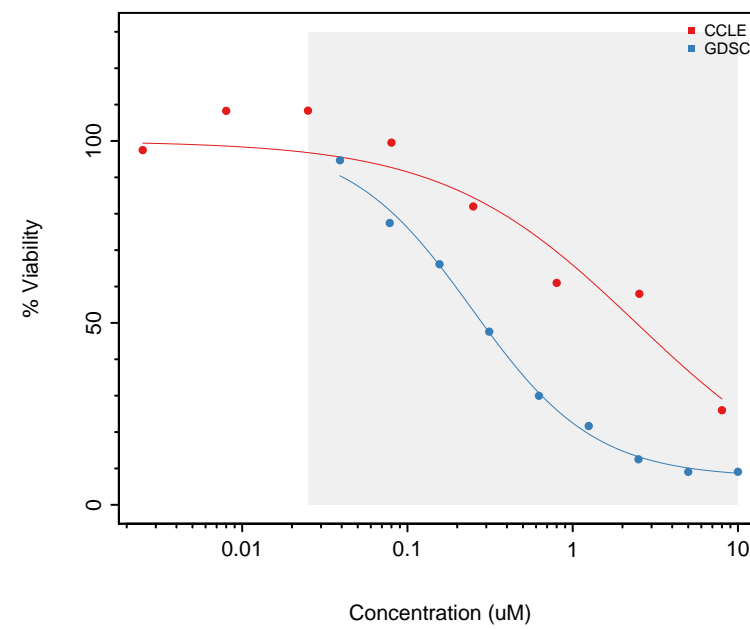

PLX4720:C3A

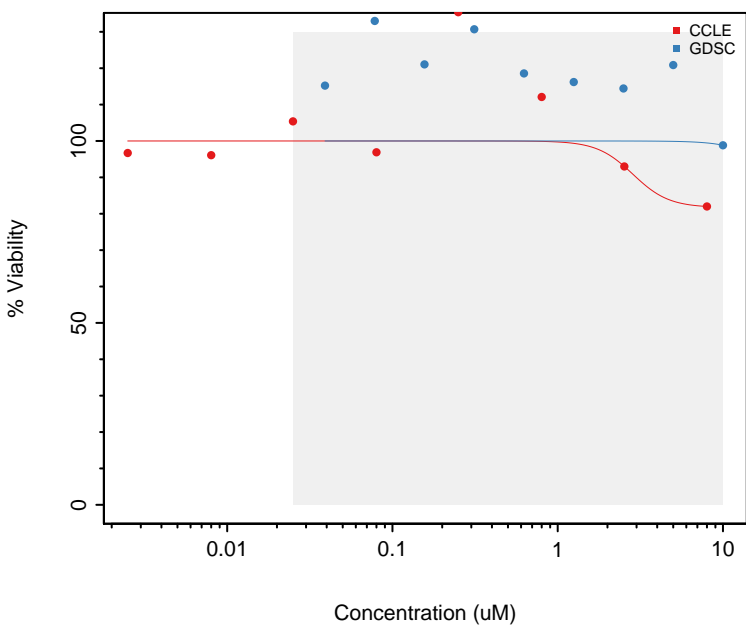

PLX4720:CAL-12T

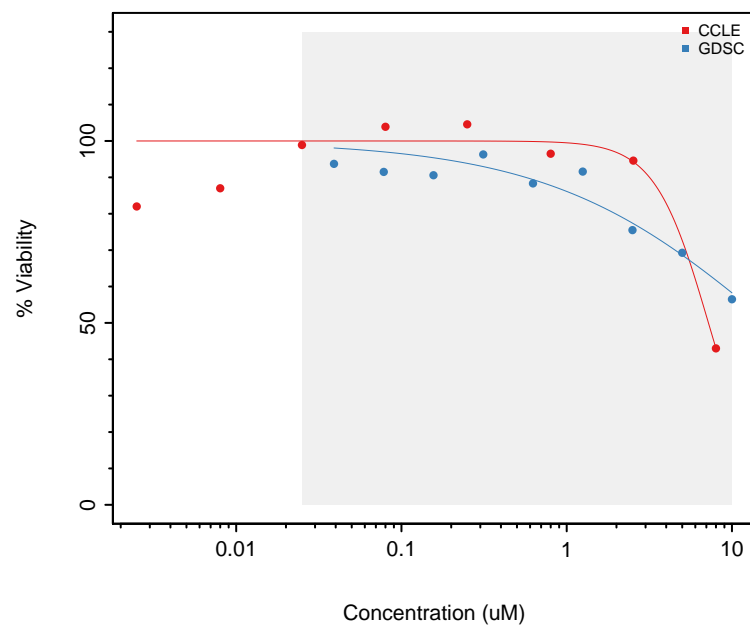

PLX4720:CAL-27

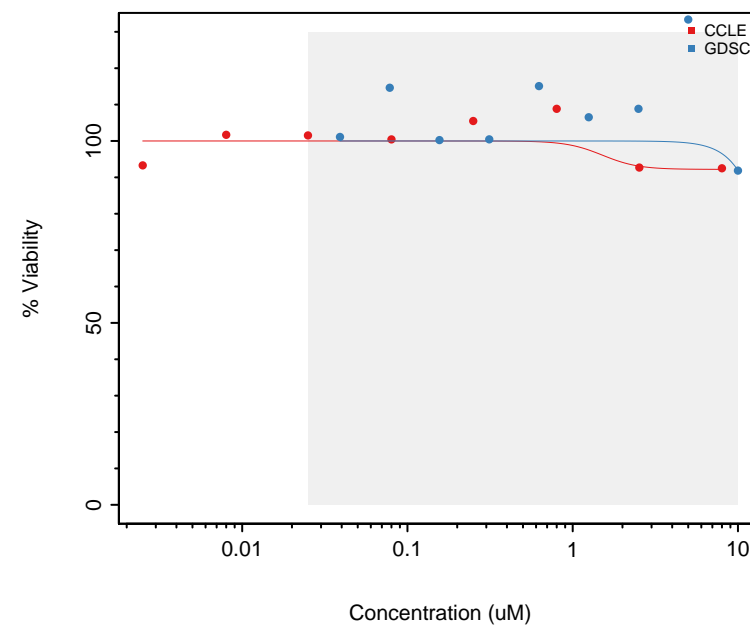





PLX4720:COLO-741

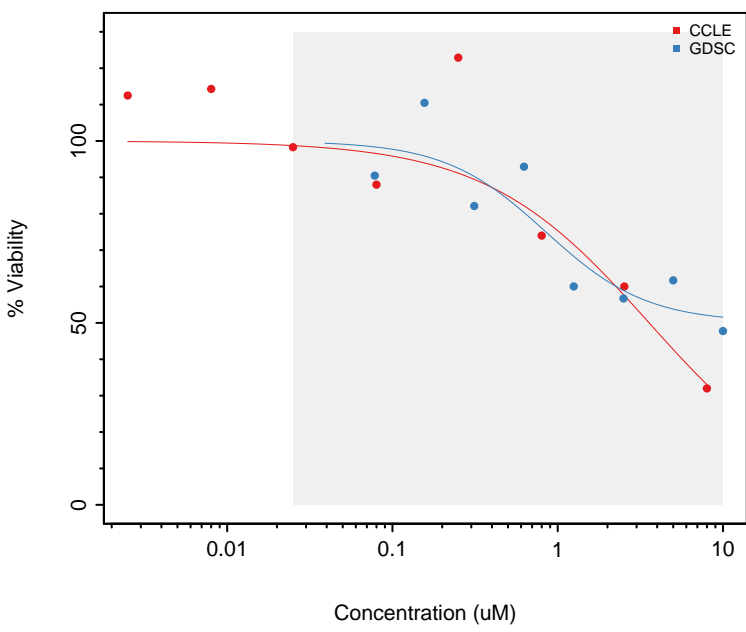

PLX4720:COR-L105

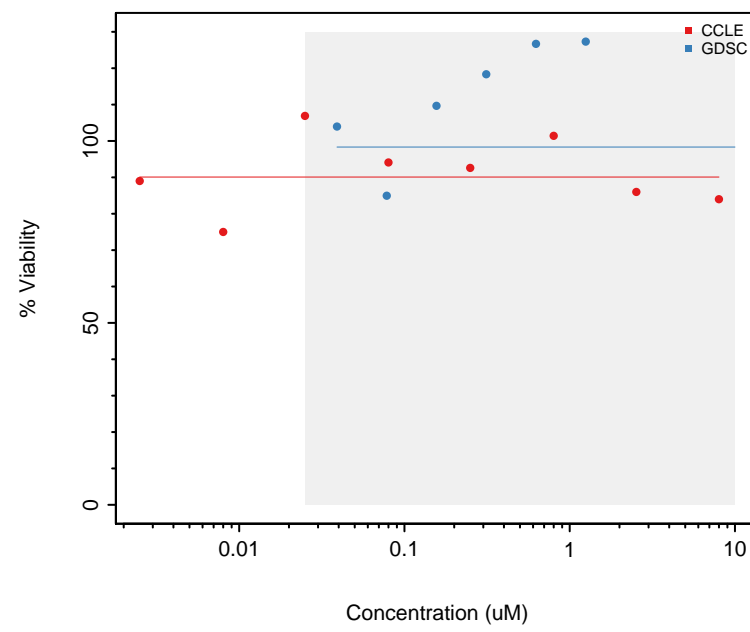

PLX4720:COR-L23

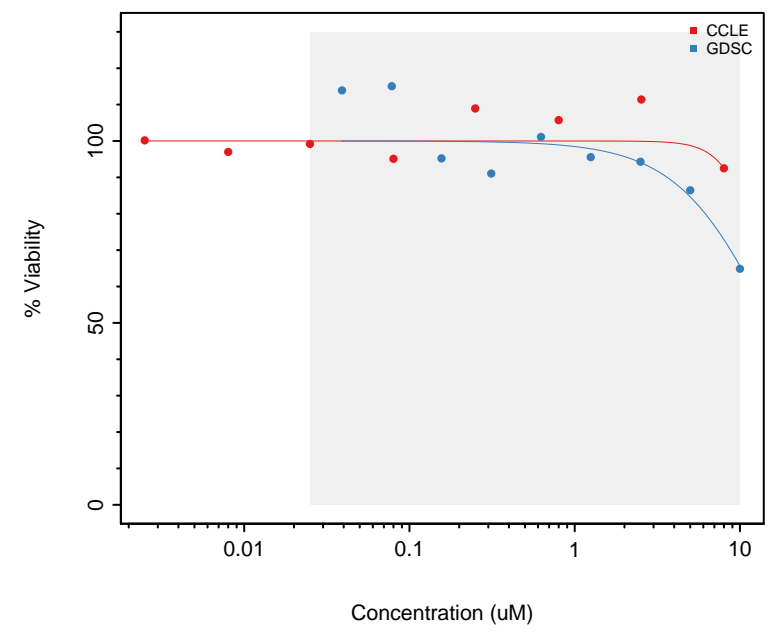

PLX4720:Daoy

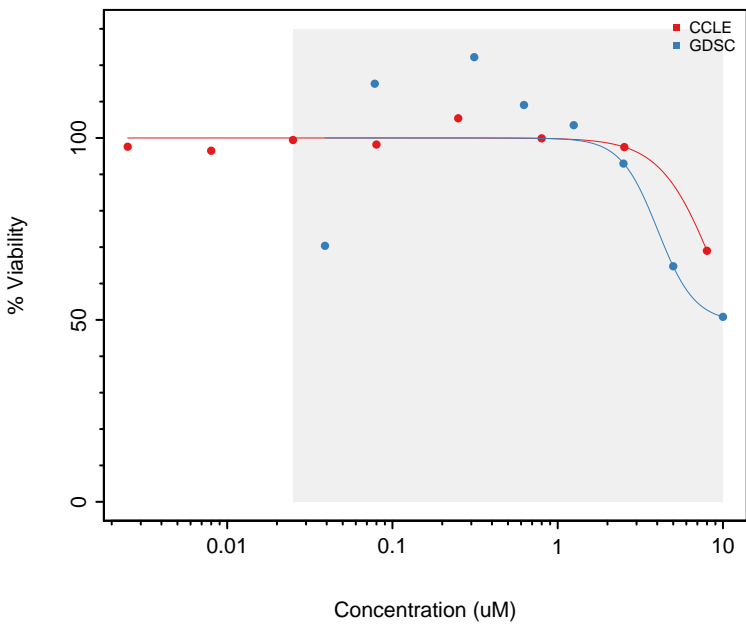

PLX4720:DBTRG-05MG

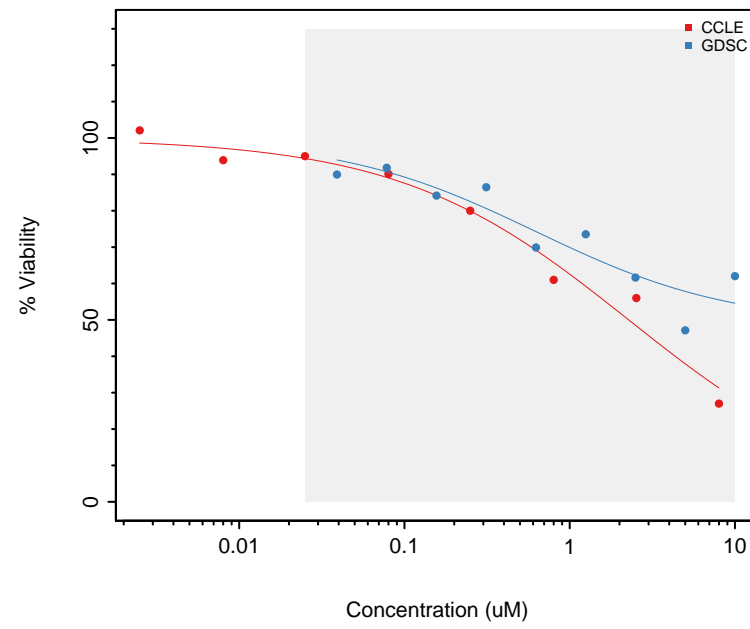

PLX4720:DEL

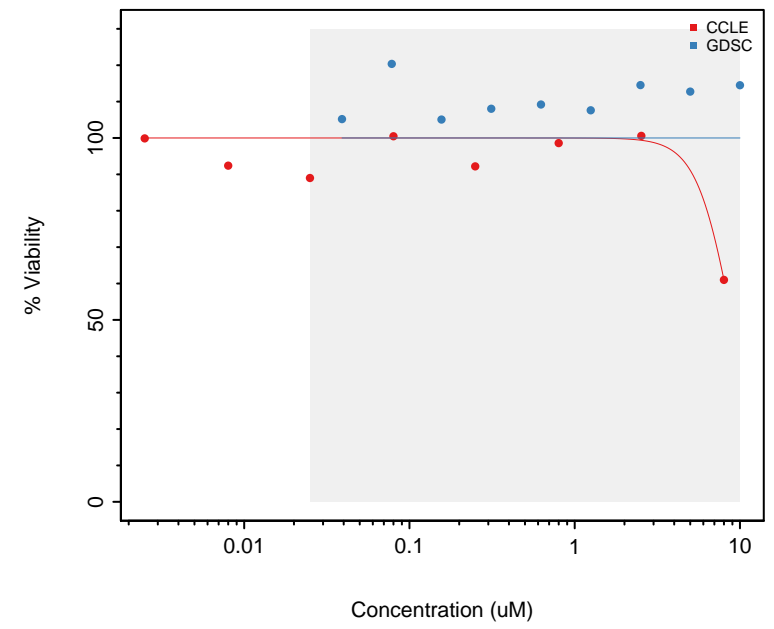

PLX4720:Detroit562

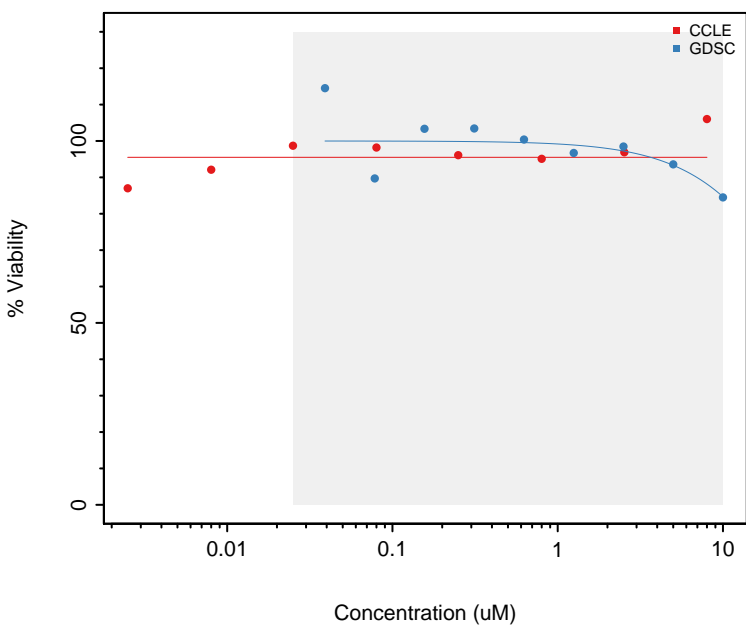

PLX4720:DK-MG

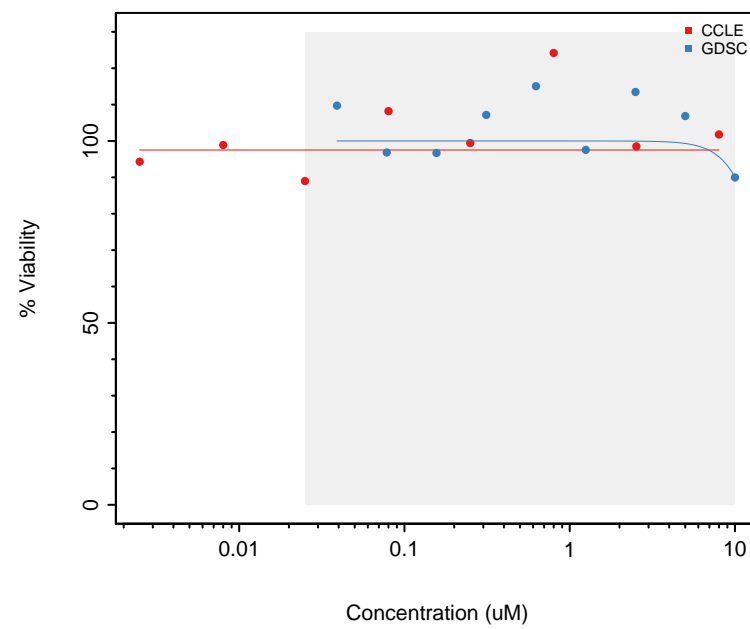

PLX4720:DMS-114

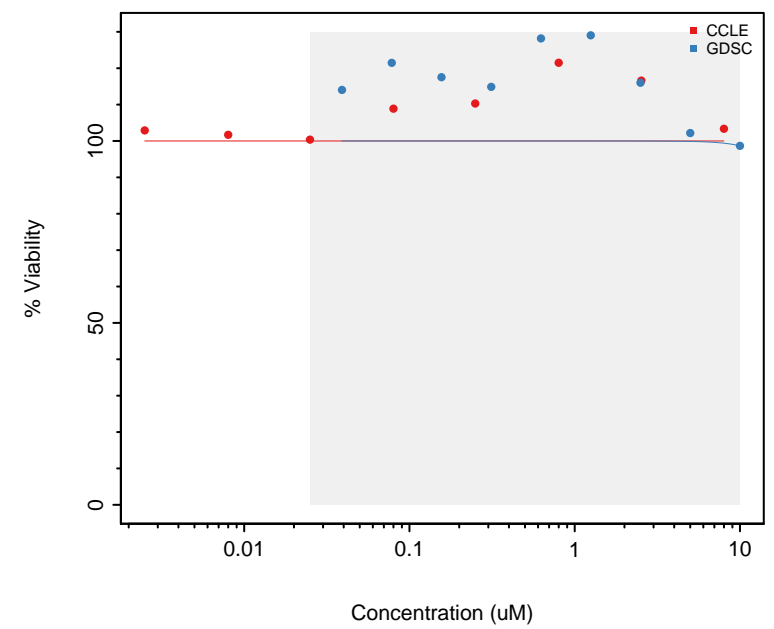

PLX4720:DOHH-2

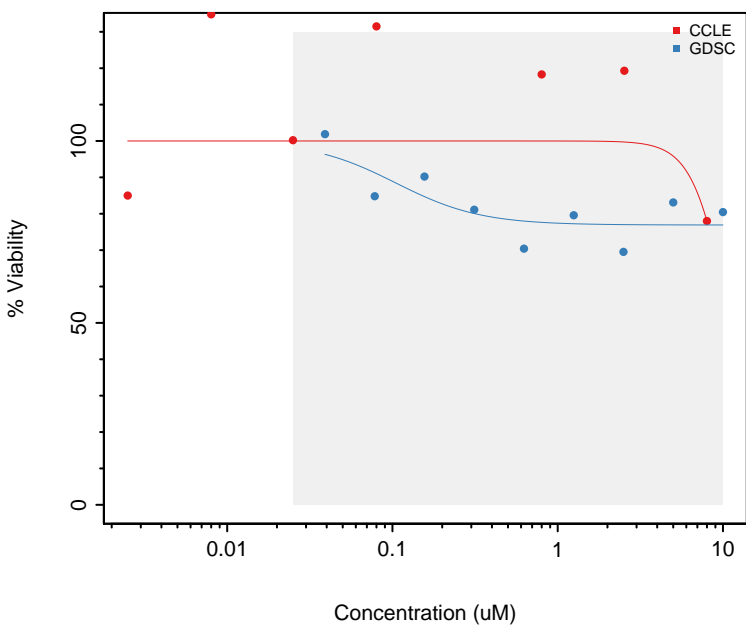

PLX4720:DU-145

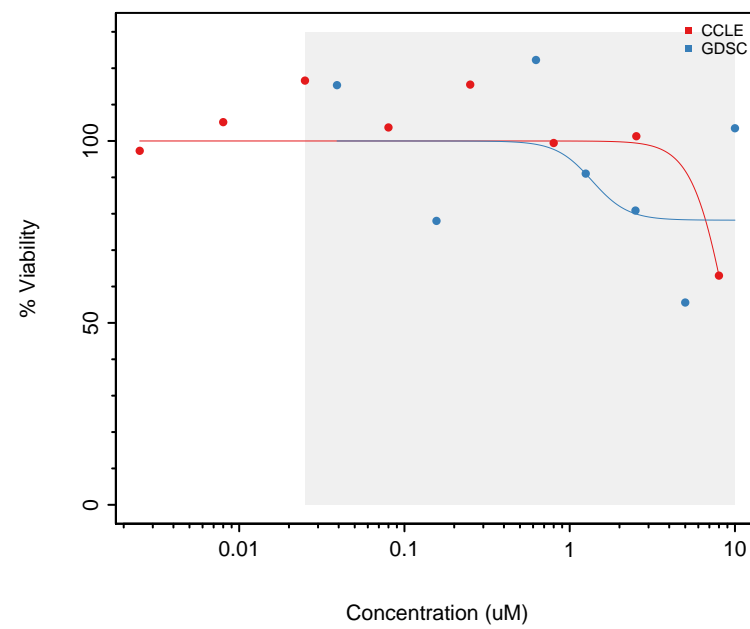

PLX4720:EB2

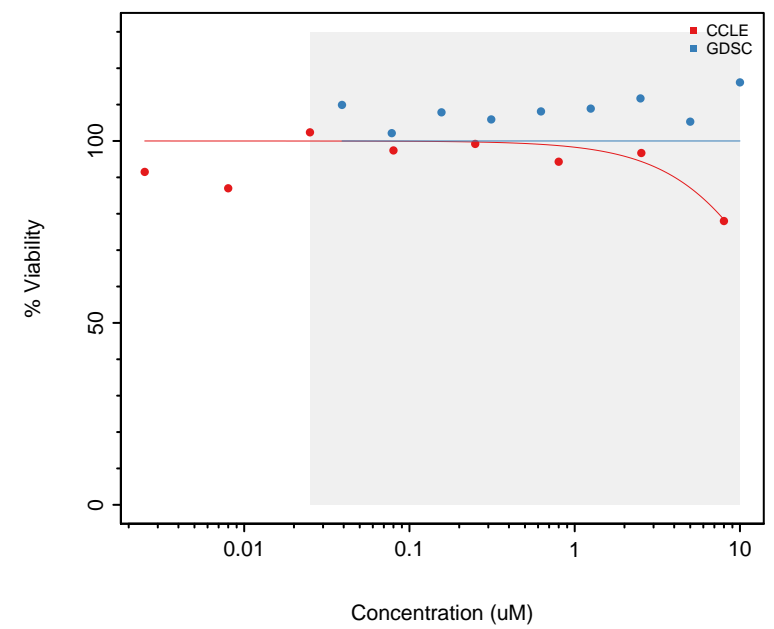













PLX4720:MDA-MB-175-VII

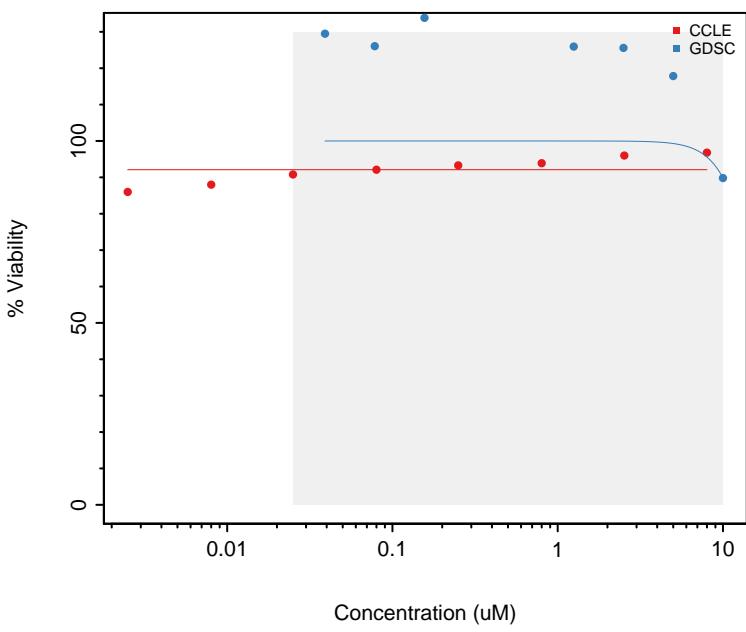

PLX4720:MDA-MB-415

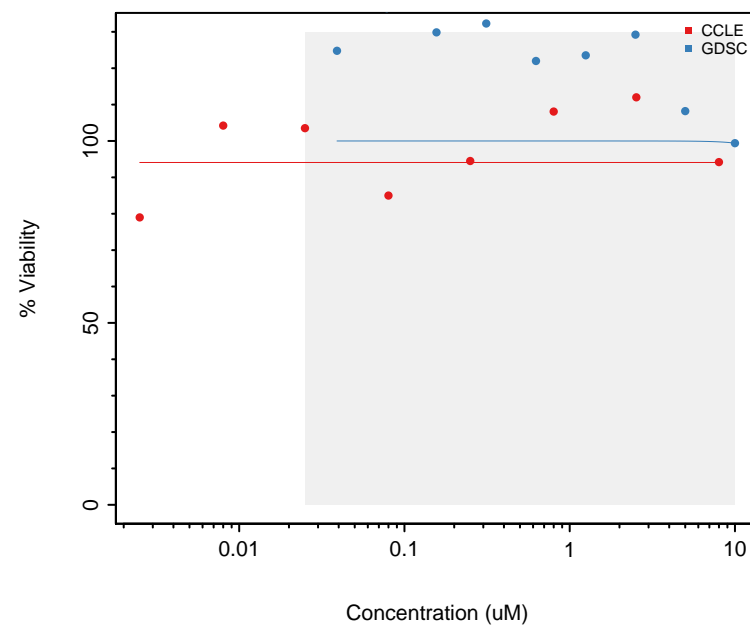

PLX4720:MDA-MB-453

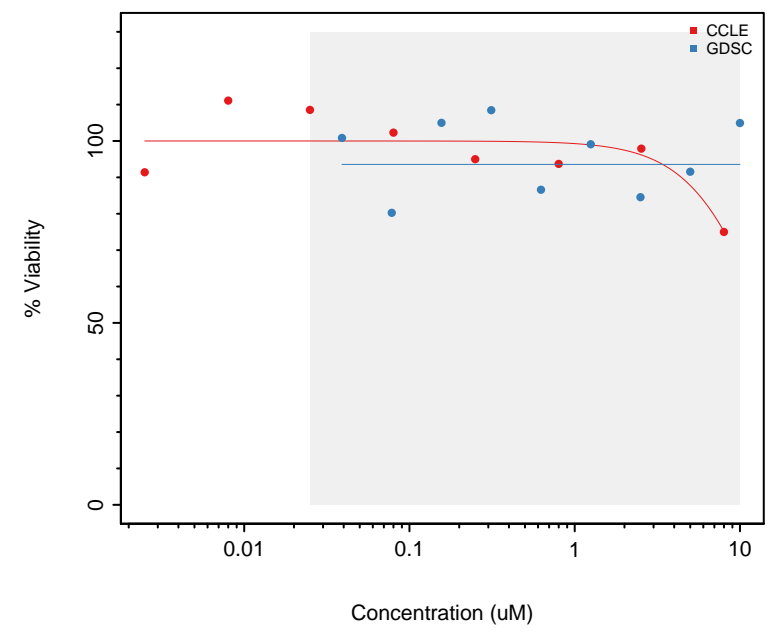

PLX4720:MDA-MB-468

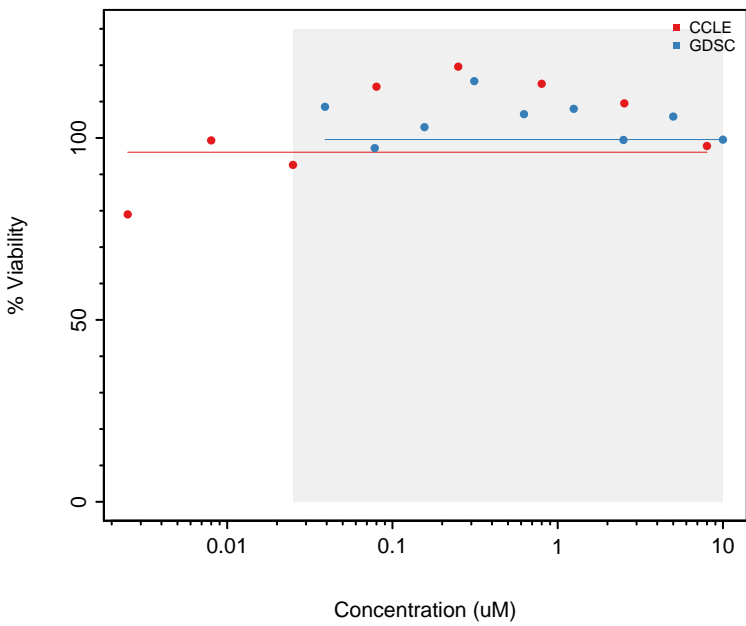

PLX4720:MEG-01

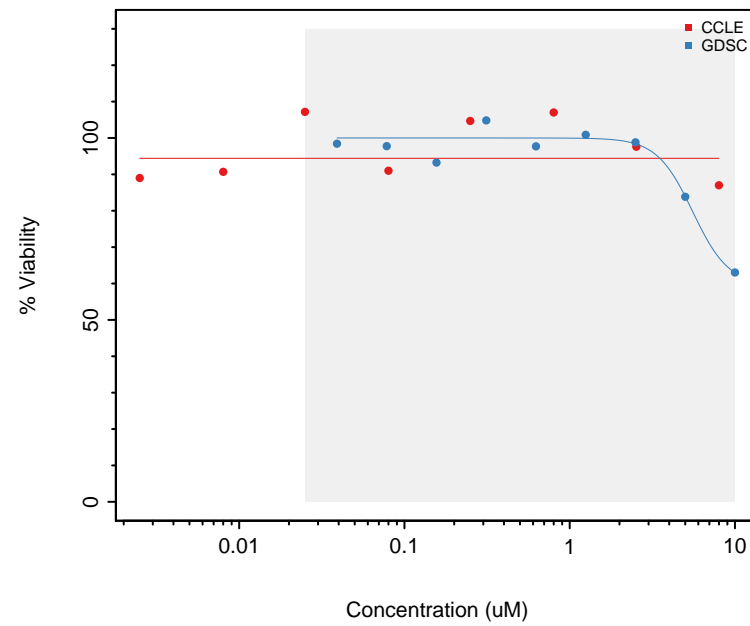

PLX4720:MEL-HO

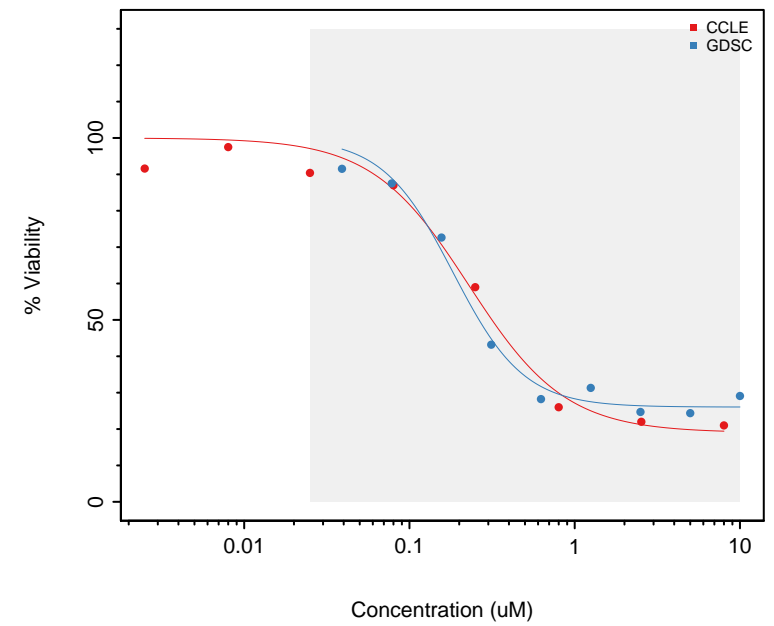

PLX4720:Mewo

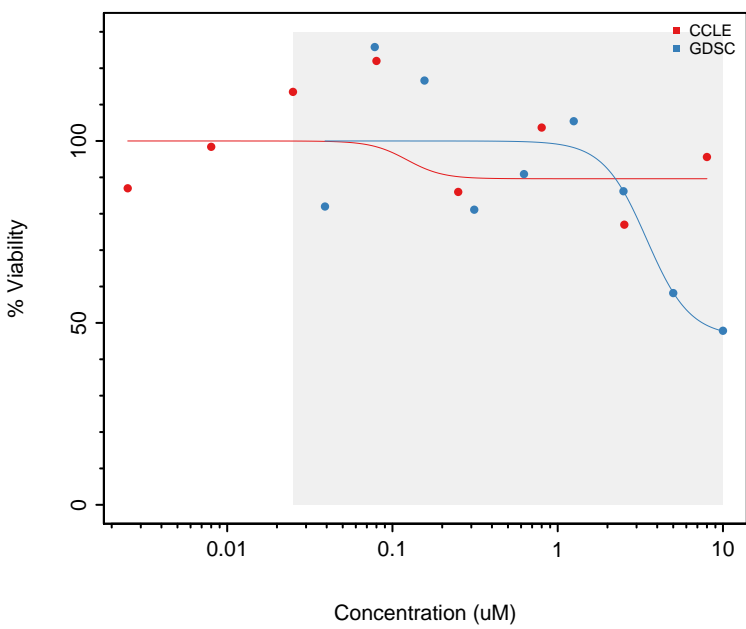

PLX4720:MFE-280

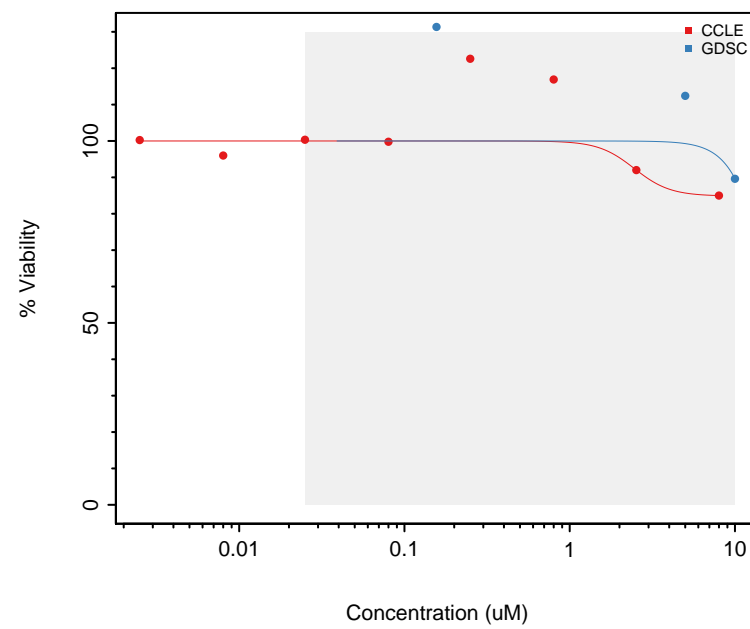

PLX4720:MFE-296

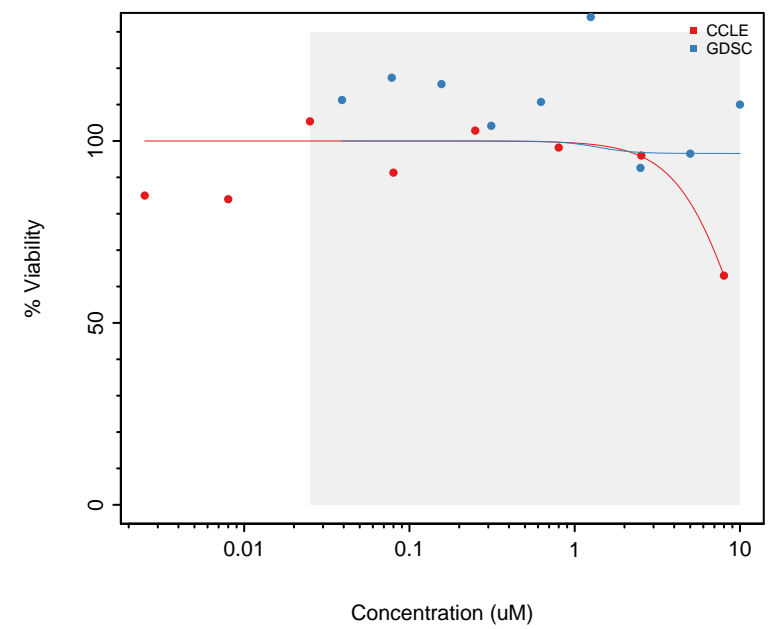

PLX4720:MG-63

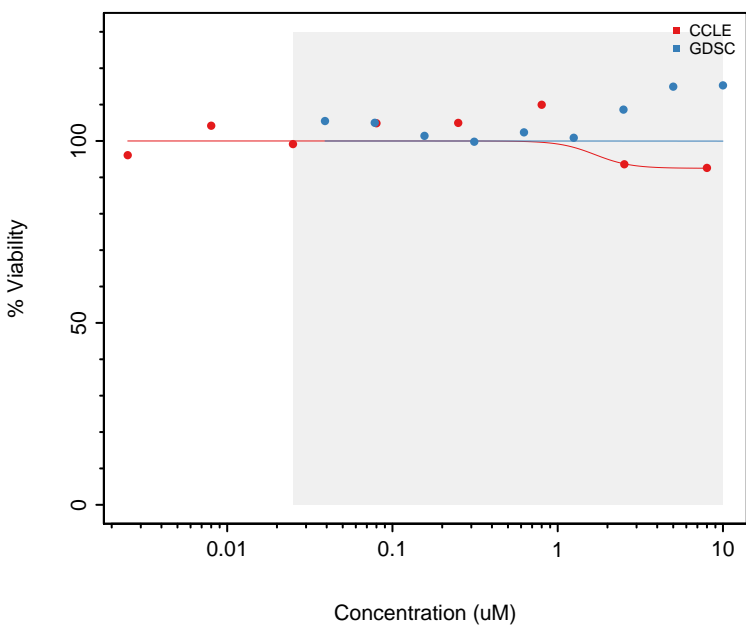

PLX4720:MHH-ES-1

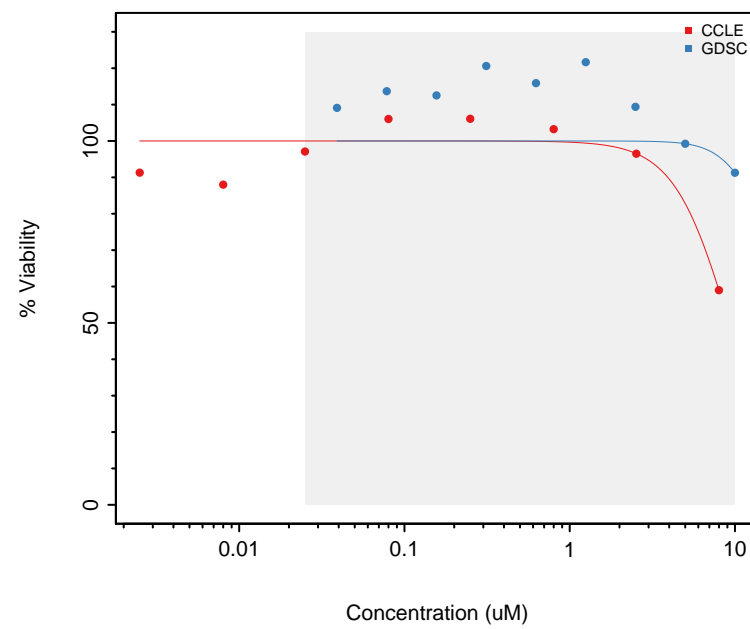

PLX4720:MIA-PaCa-2

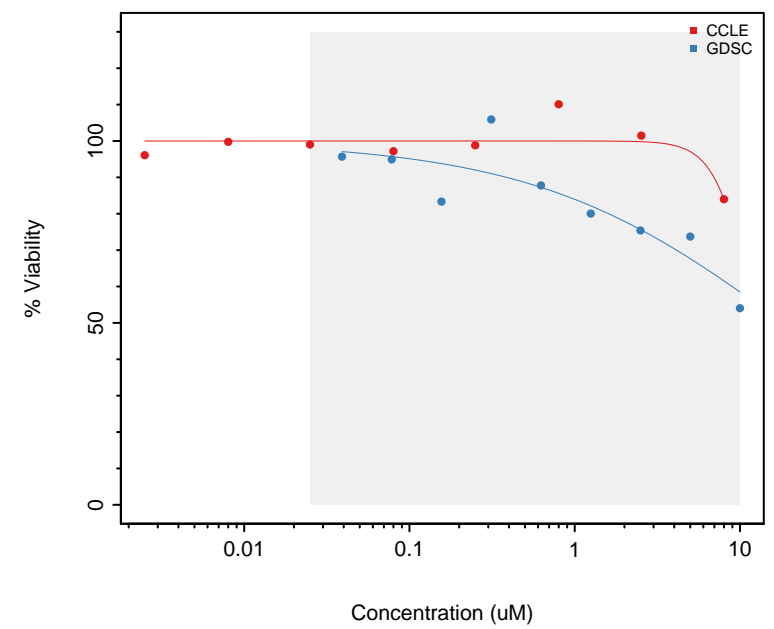









PLX4720:NCI-H520

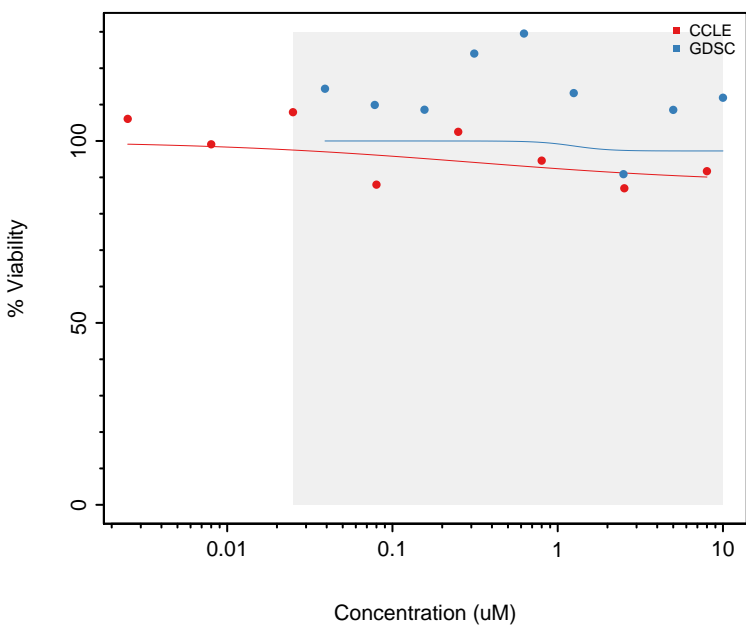

PLX4720:NCI-H522

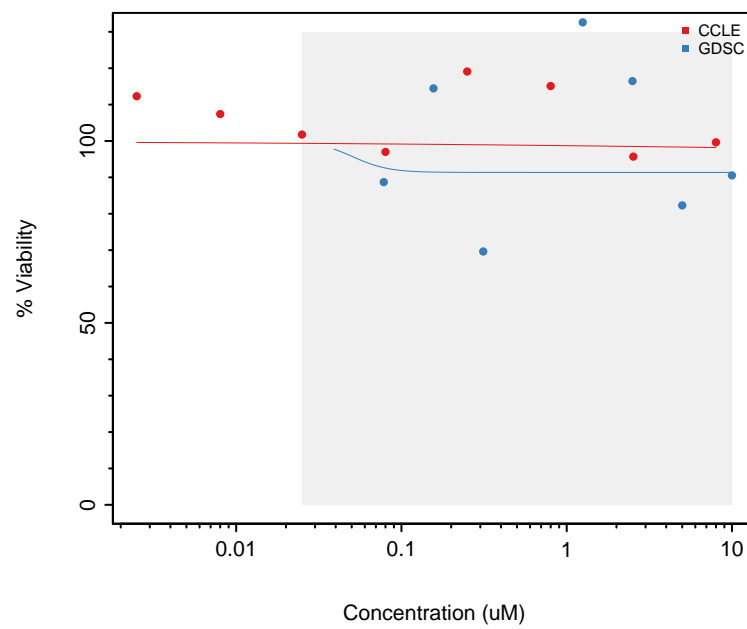

PLX4720:NCI-H650

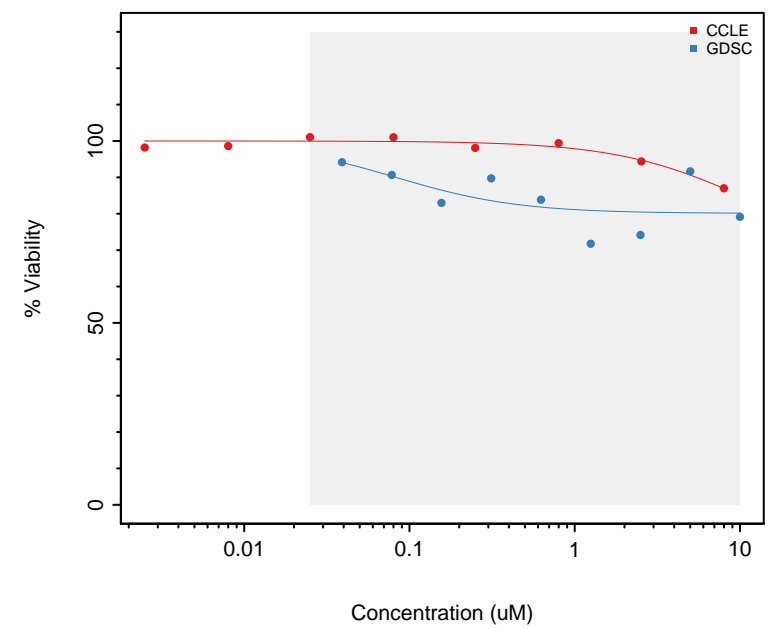

PLX4720:NCI-H661

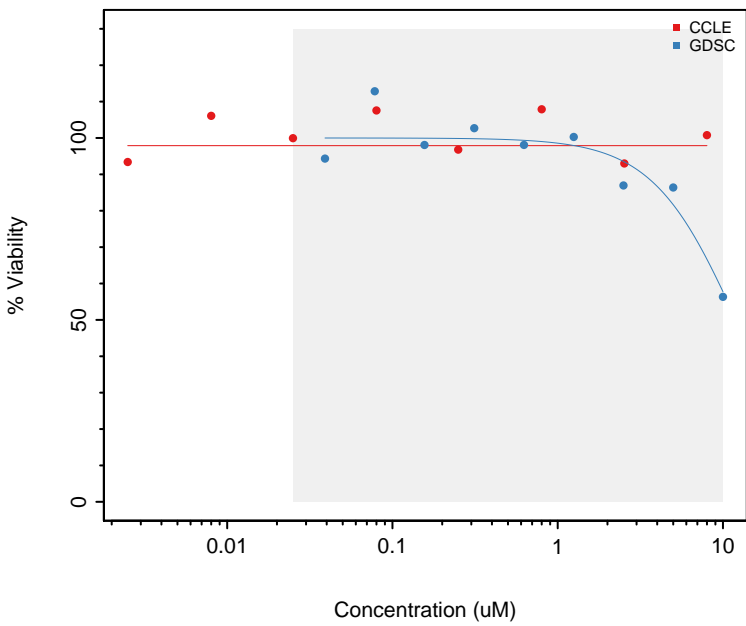

PLX4720:NCI-H747

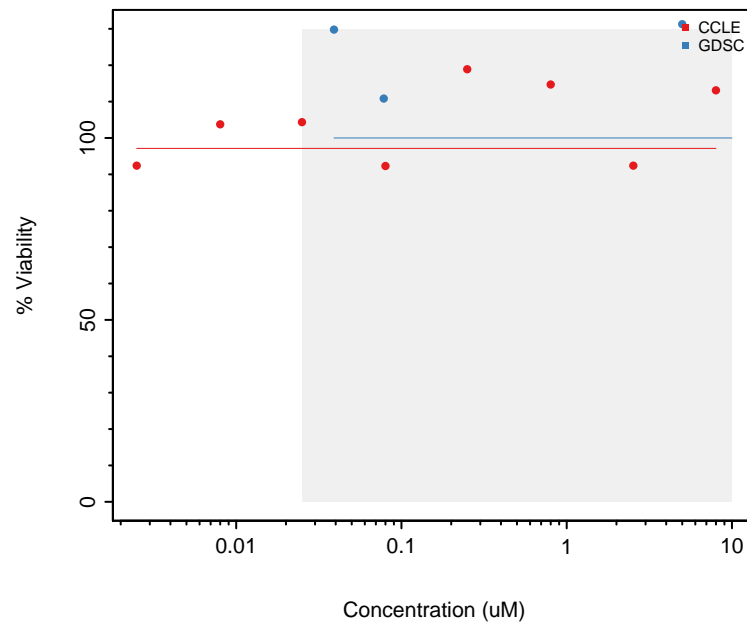

PLX4720:NCI-H810

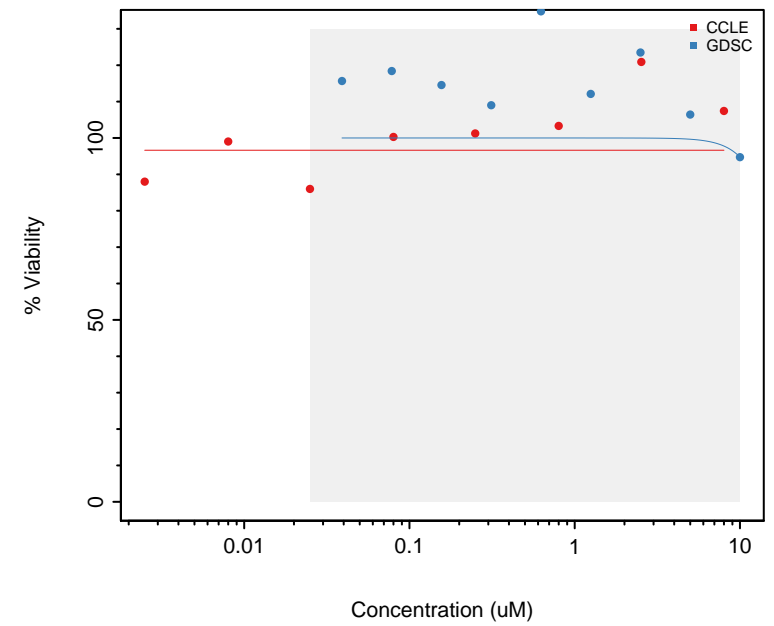

PLX4720:NCI-N87

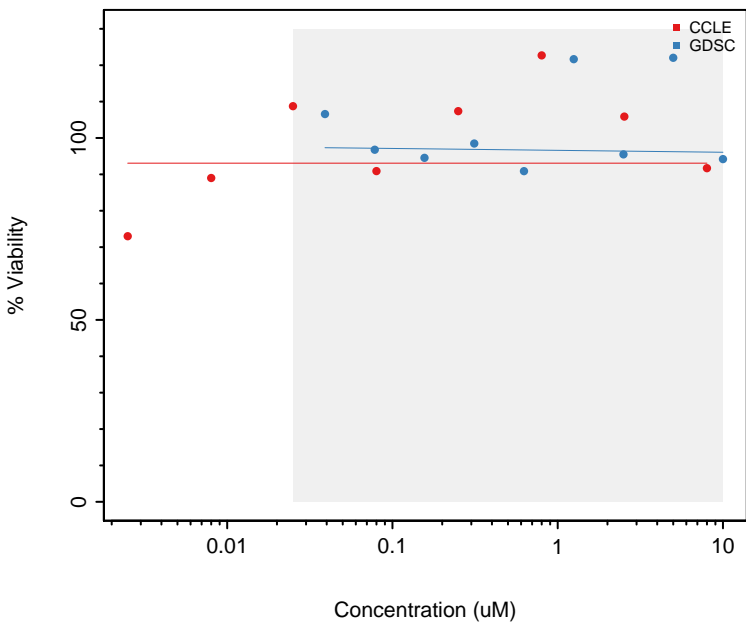

PLX4720:OVCR-3

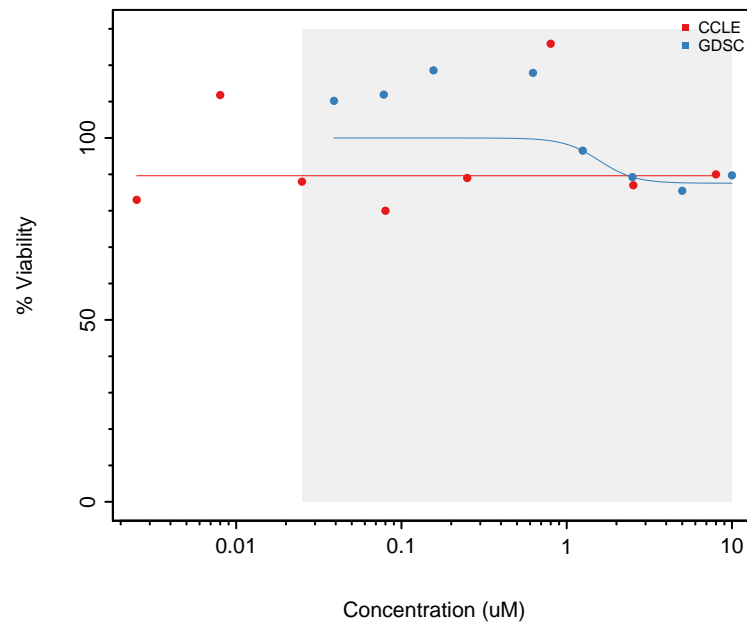

PLX4720:NUGC-3

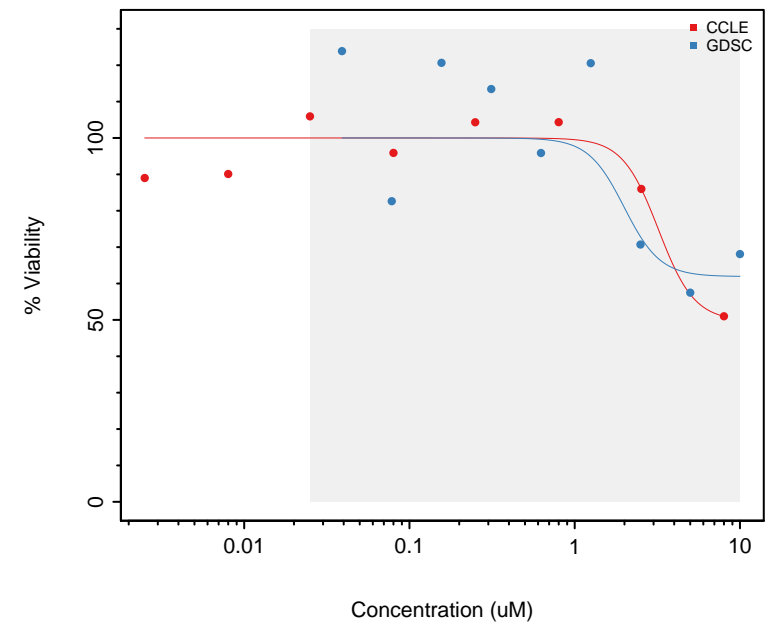

PLX4720:OC-314

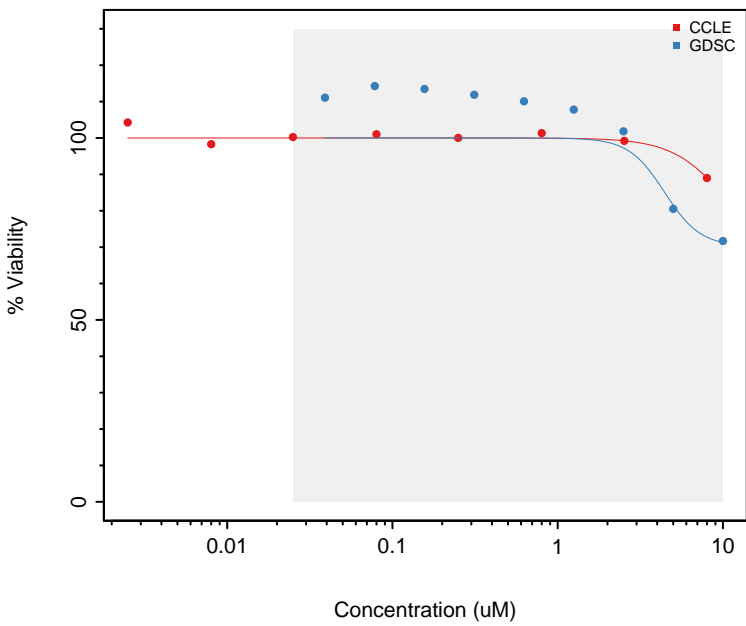

PLX4720:OCI-AML2

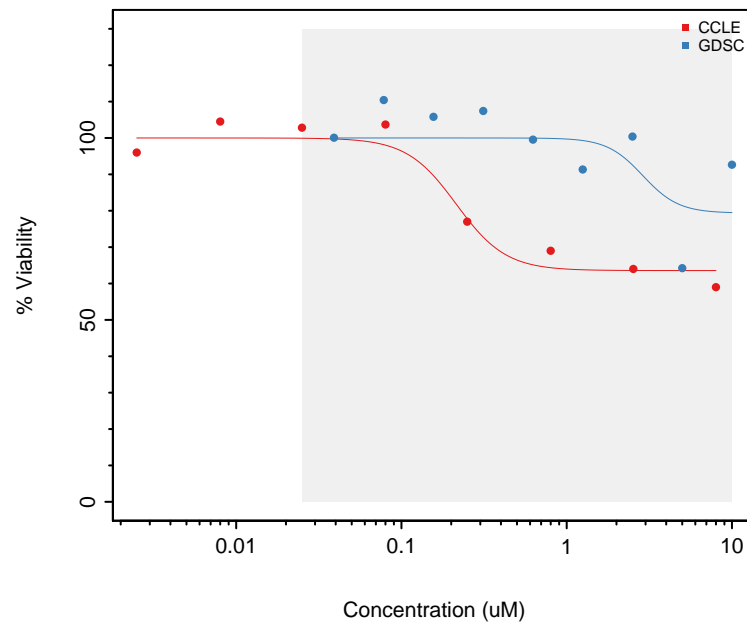

PLX4720:OE33

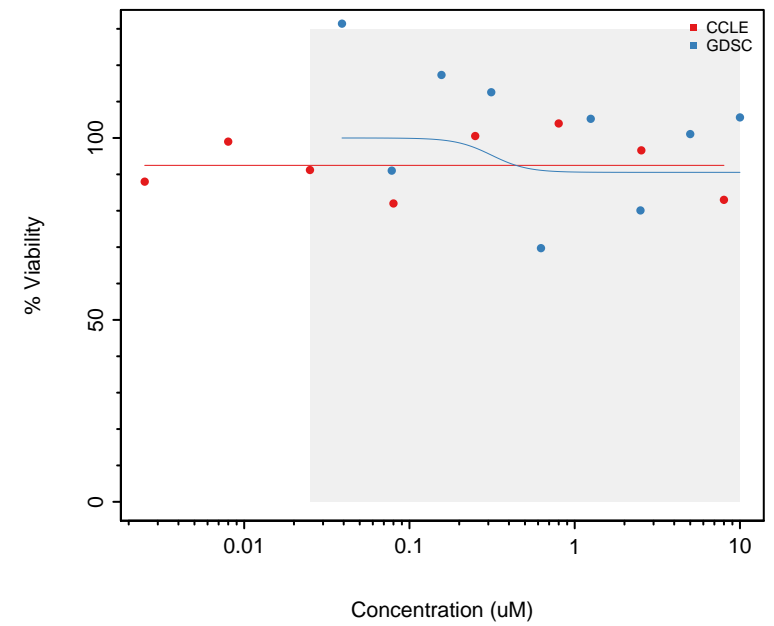











PLX4720:SNU-387

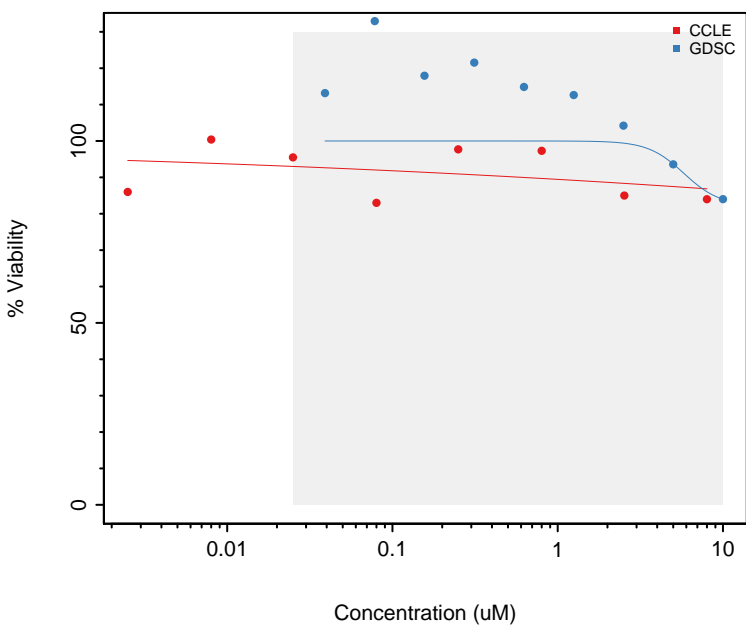

PLX4720:SNU-423

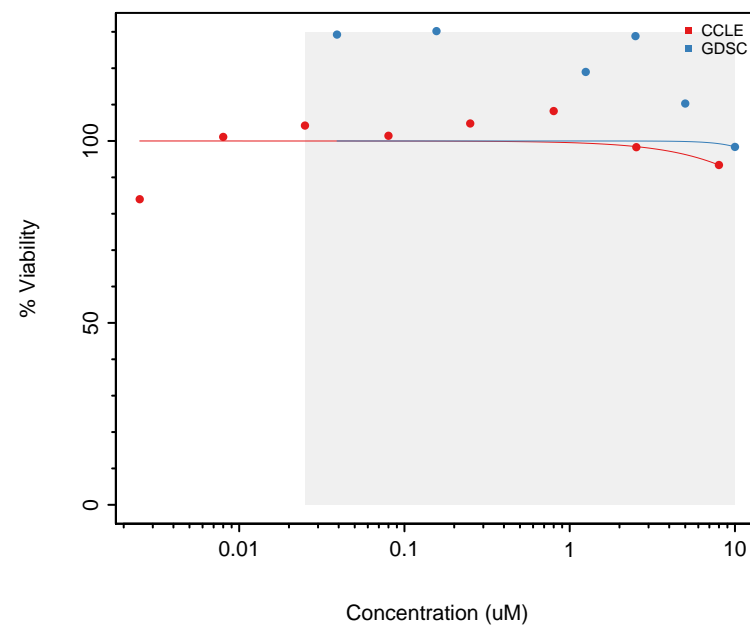

PLX4720:SNU-449

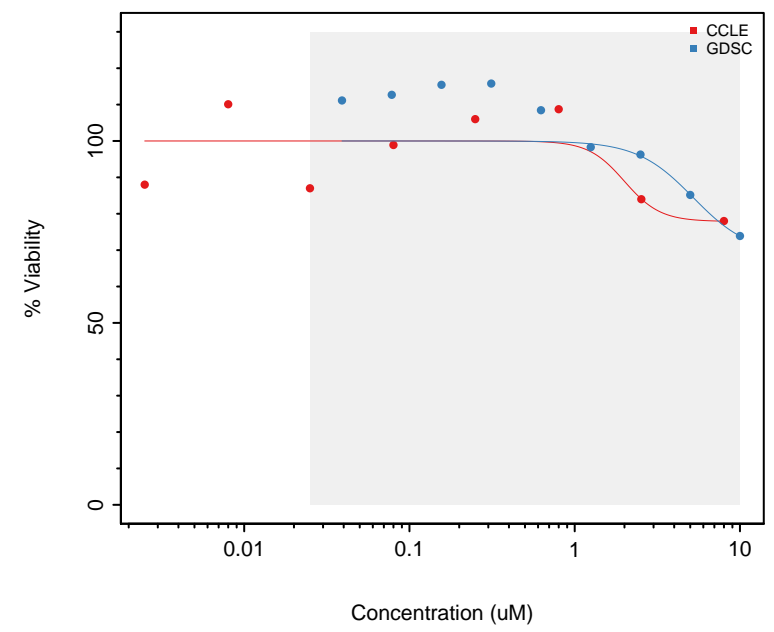

PLX4720:SNU-C2B

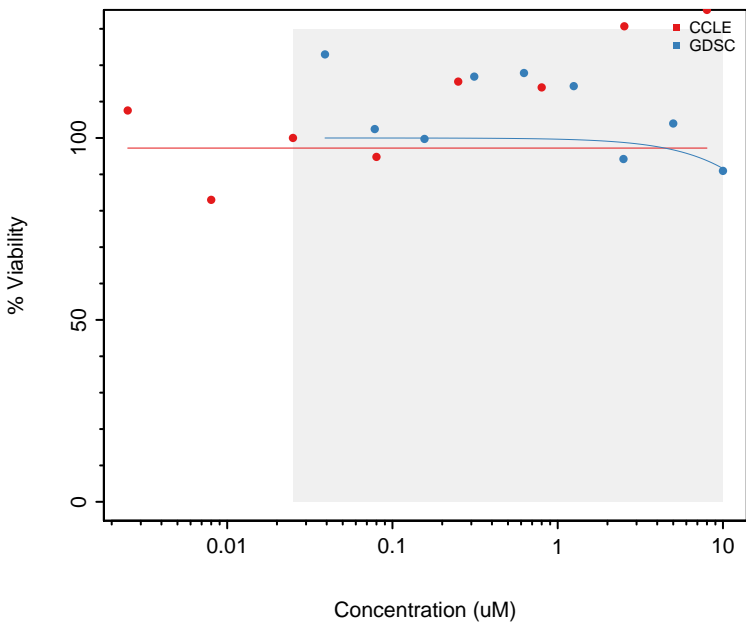

PLX4720:SUP-T1

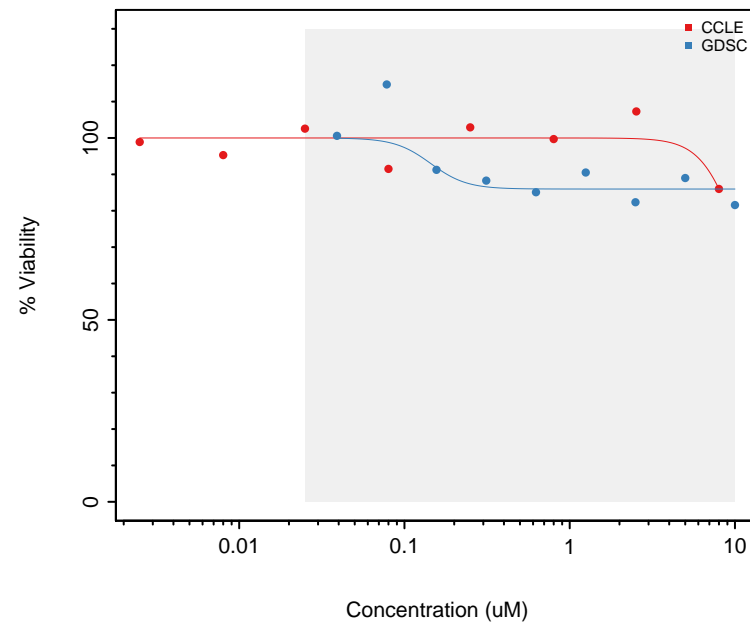

PLX4720:SW1088

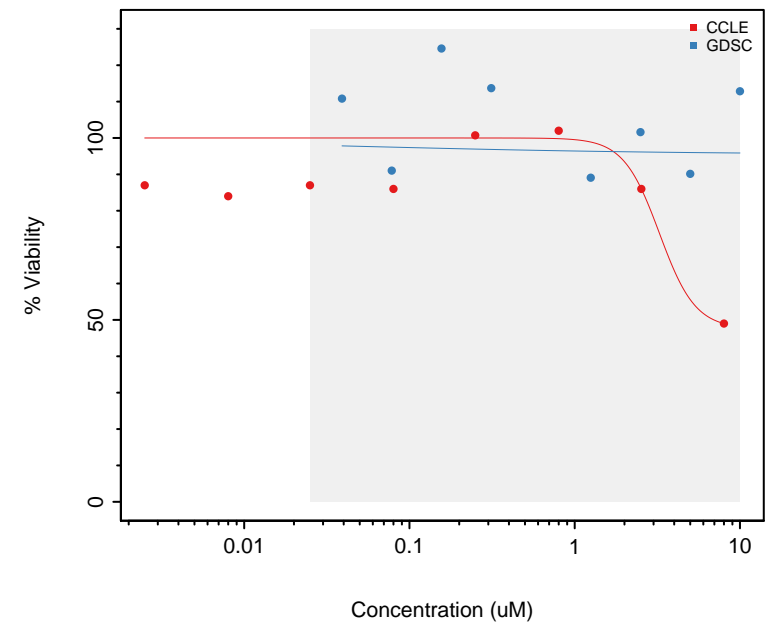

PLX4720:SW1417

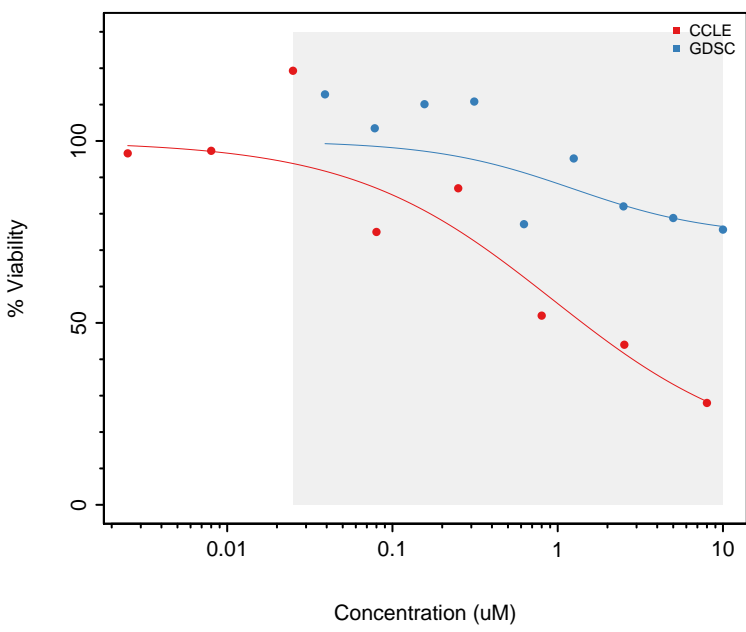

PLX4720:SW1573

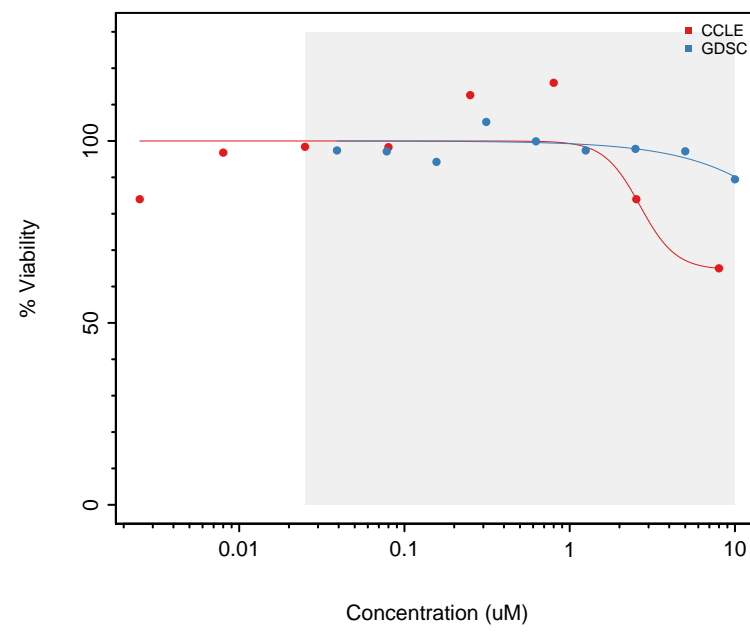

PLX4720:SW1990

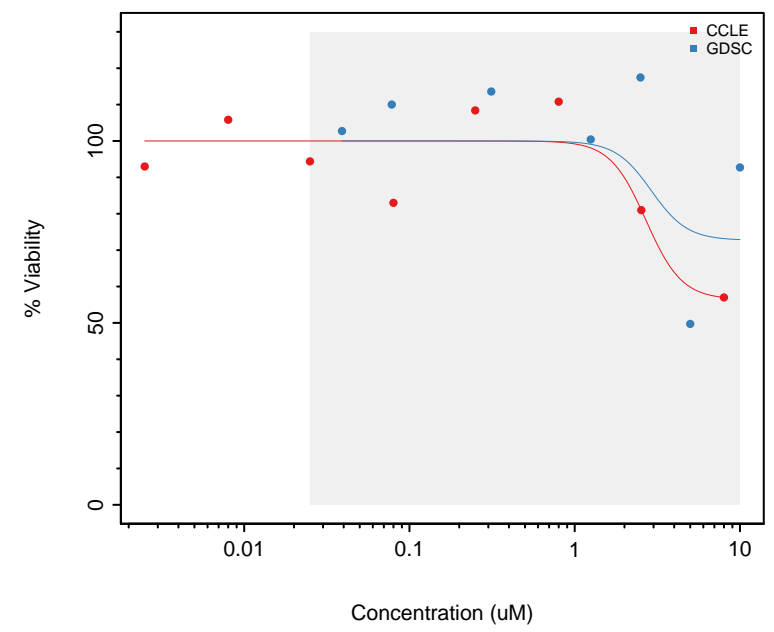

PLX4720:SW48

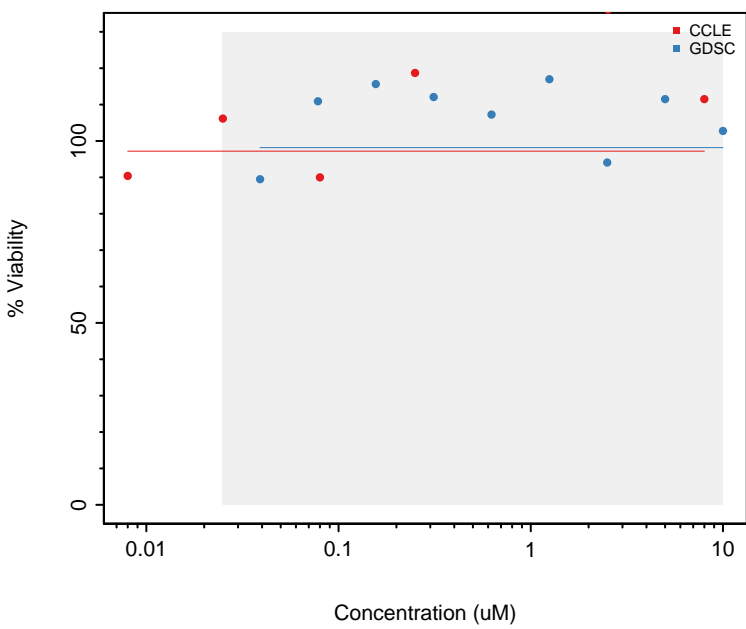

PLX4720:SW620

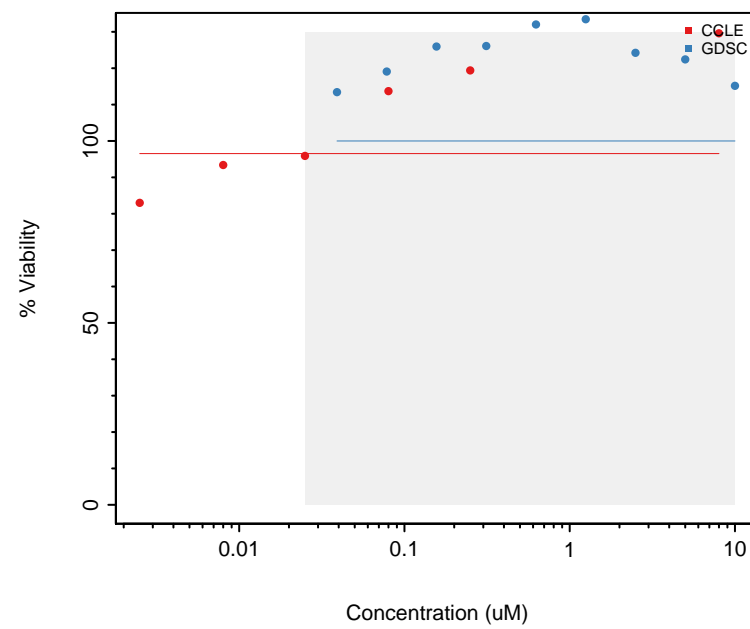

PLX4720:SW780

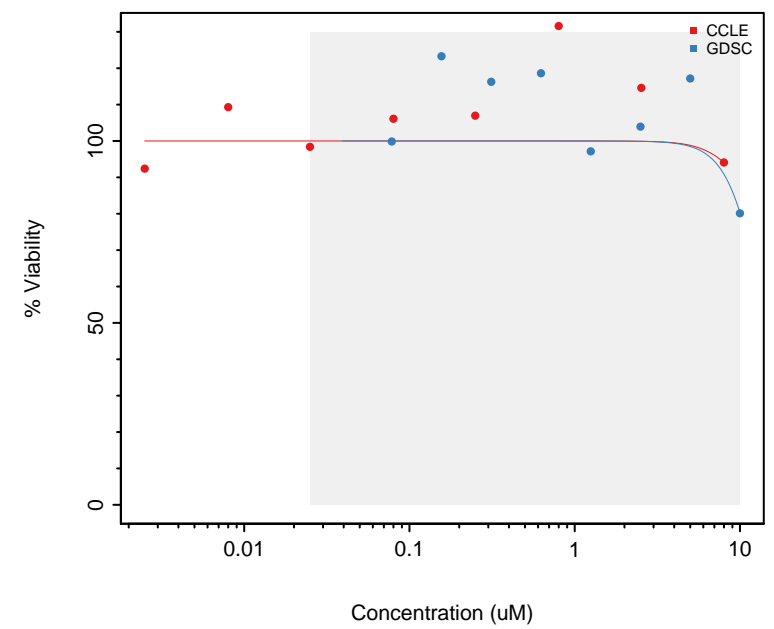



PLX4720:U-2-OS

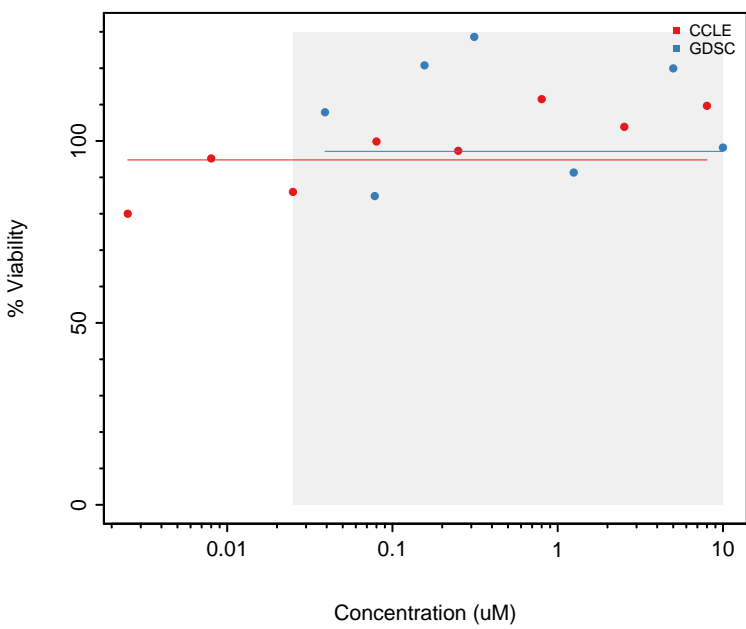

PLX4720:U-87-MG

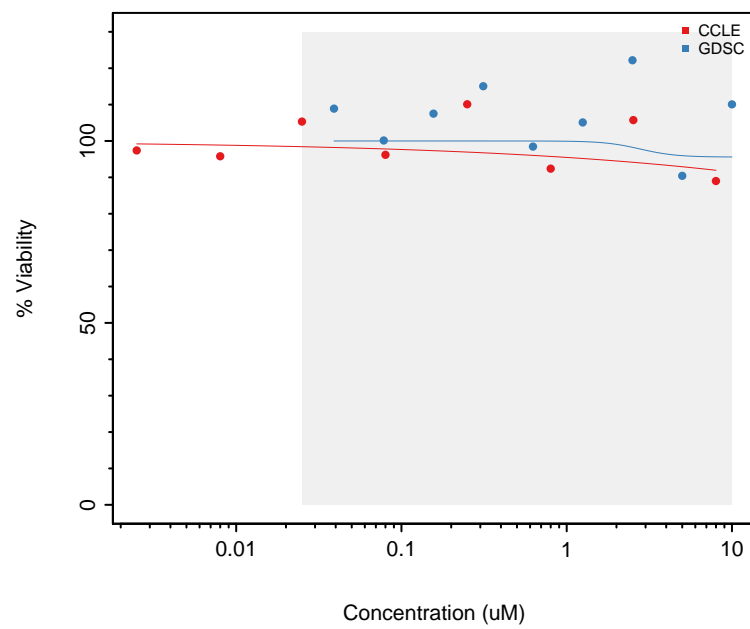

PLX4720:UACC-257

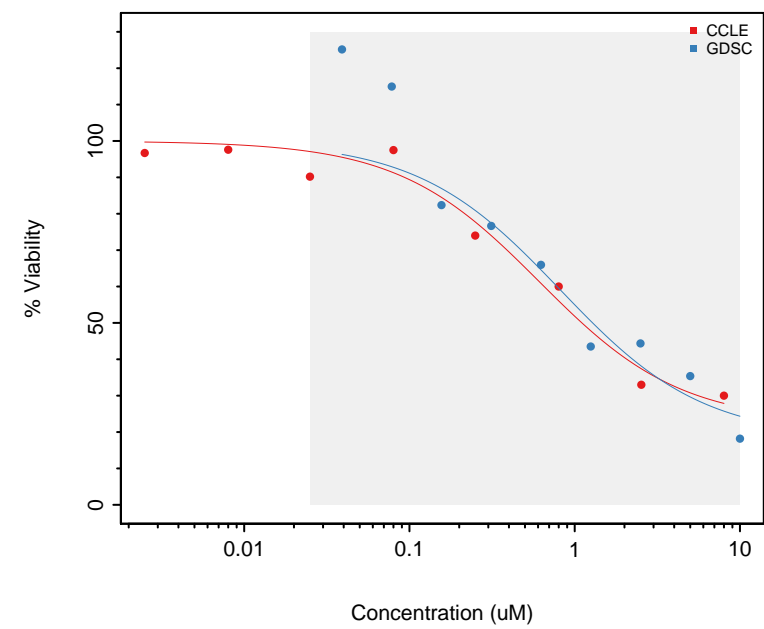

PLX4720:UACC-62

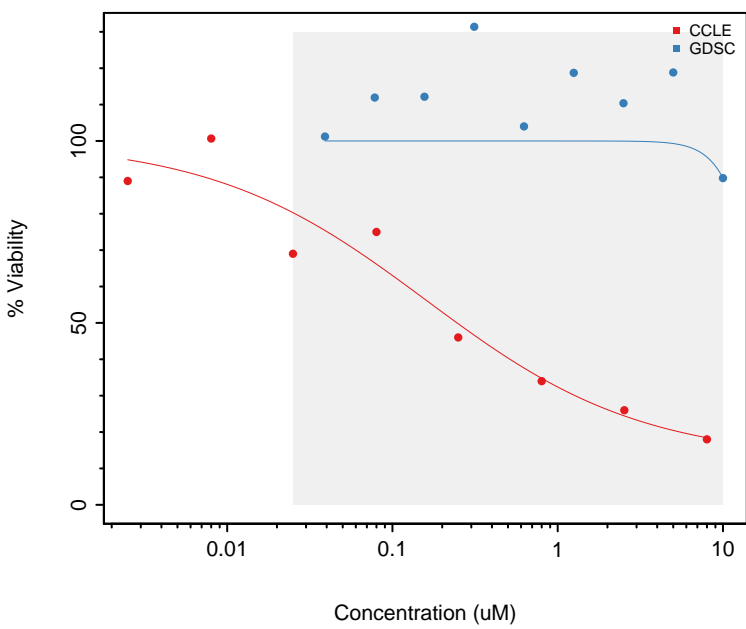

PLX4720:UM-UC-3

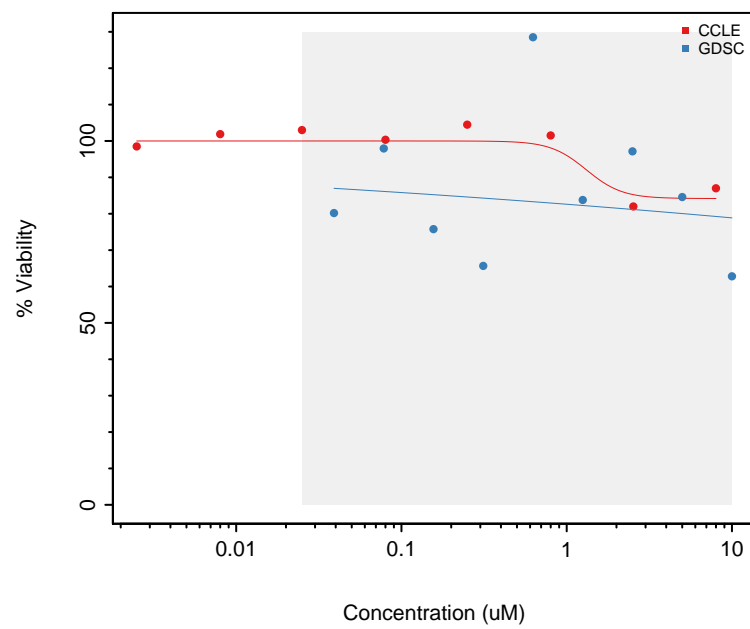

PLX4720:VMRC-RCZ

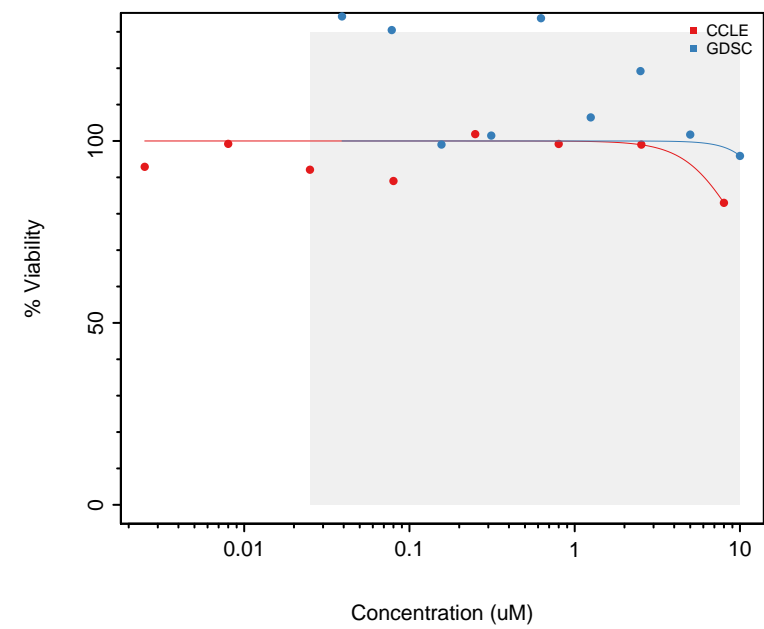

PLX4720:WM-115

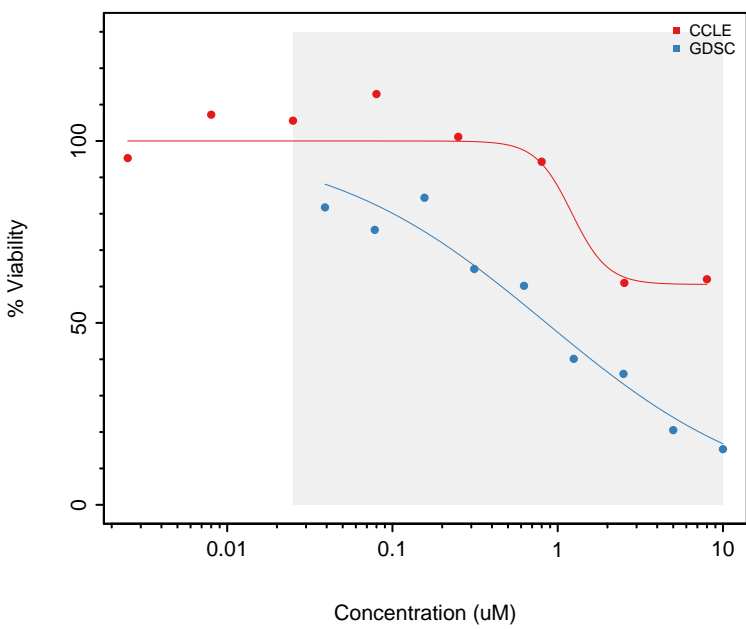

PLX4720:YKG-1

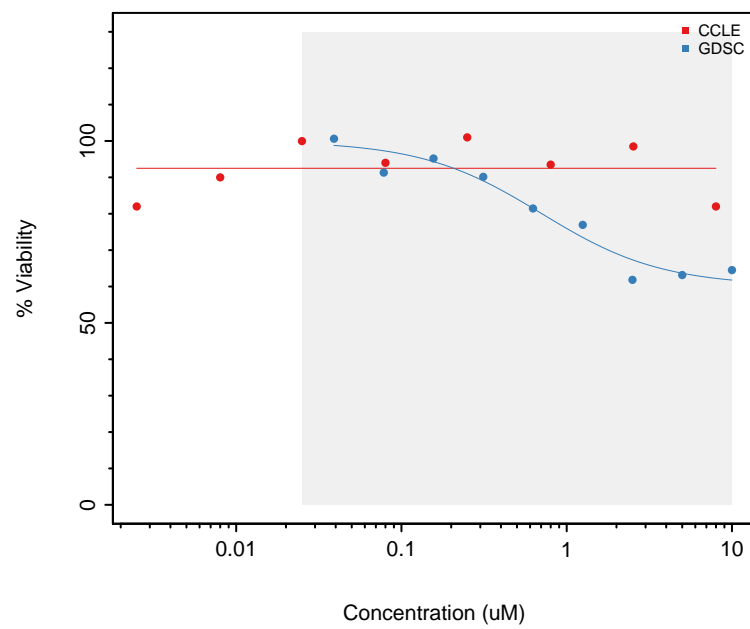

PLX4720:ZR-75-30

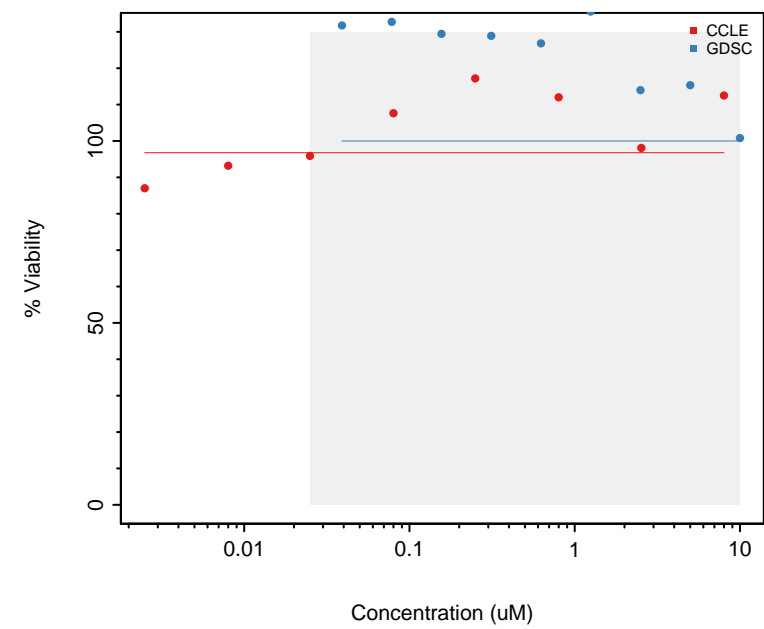

TAE684:697

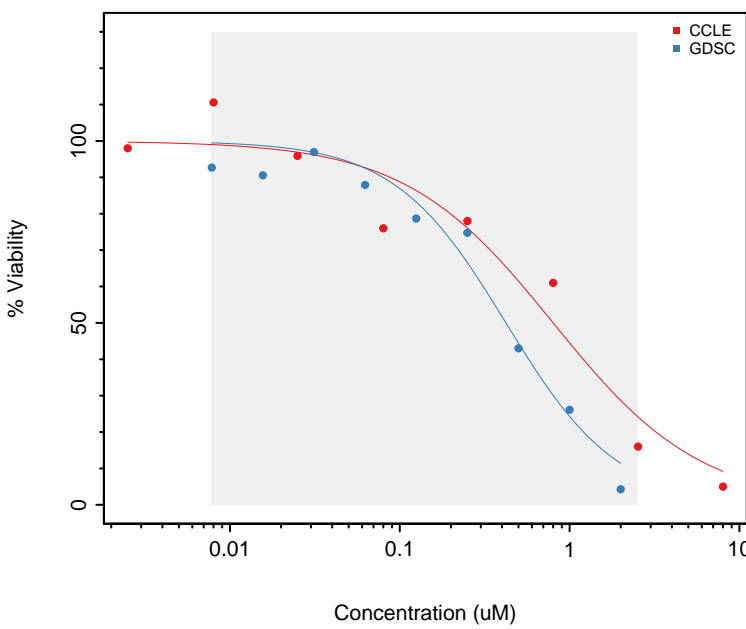

TAE684:8-MG-BA

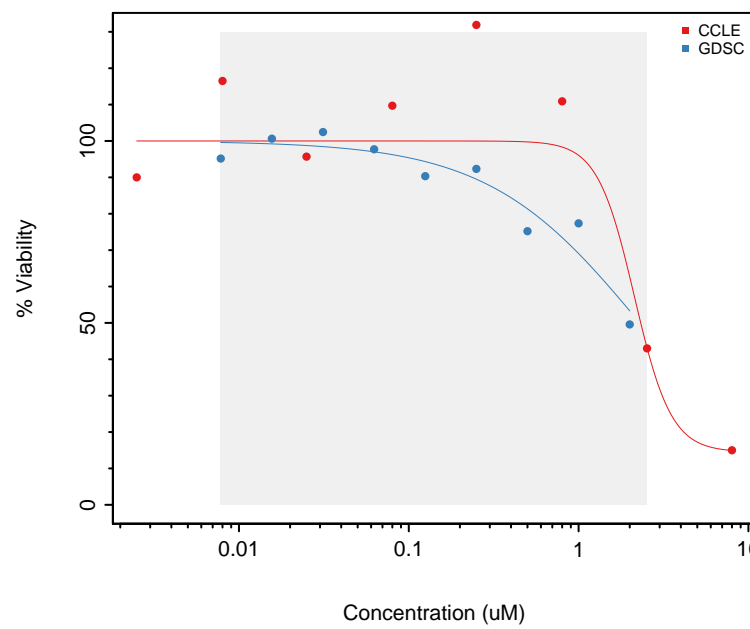

TAE684:A253

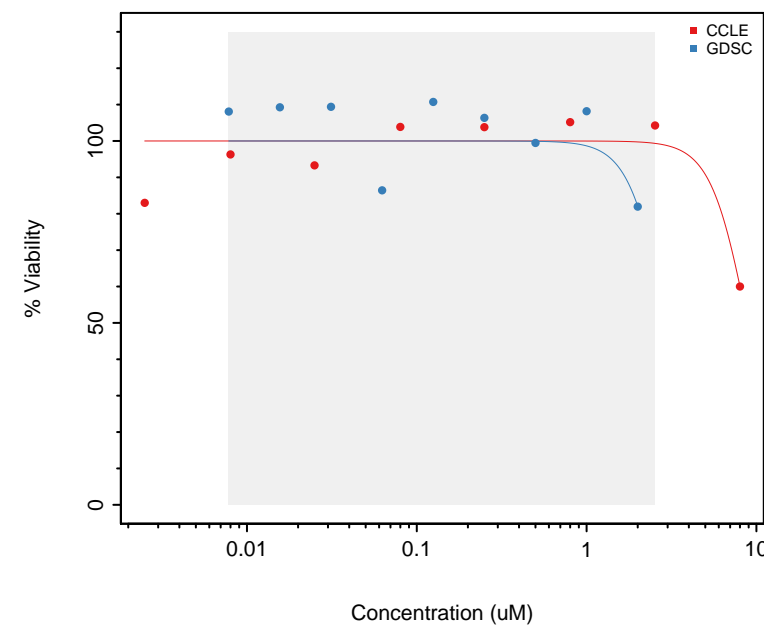

TAE684:BL-41

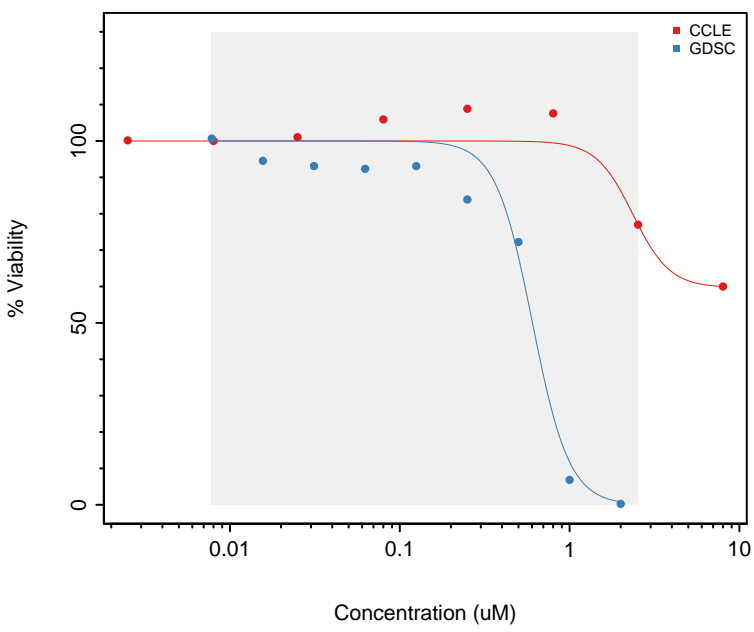

TAE684:BL-70

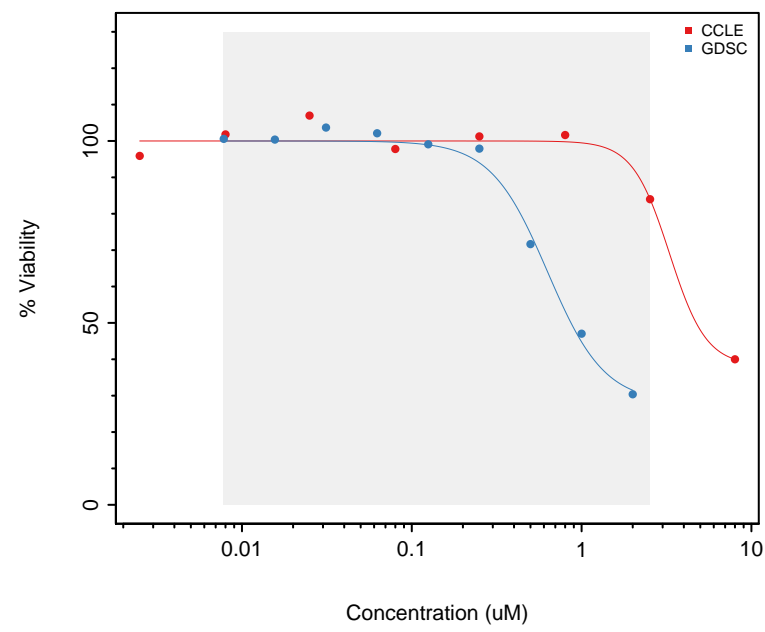

TAE684:BT-474

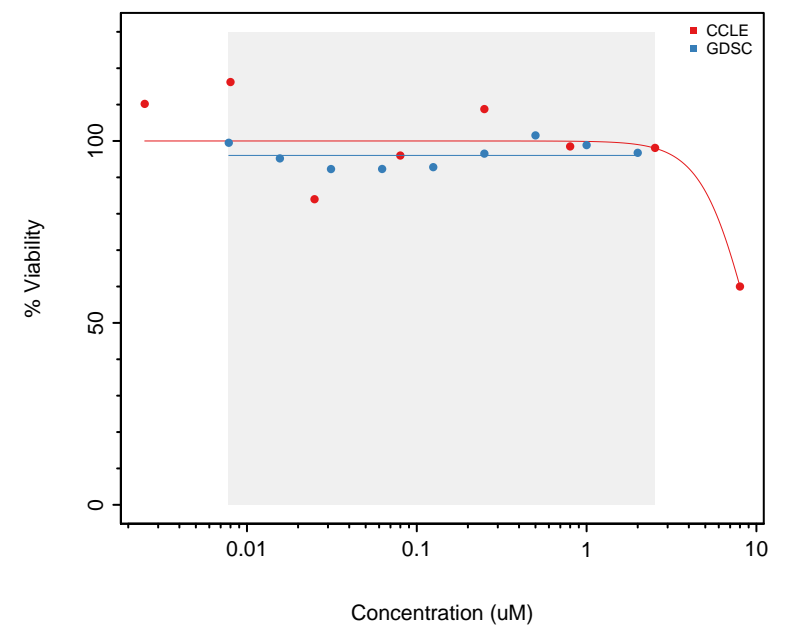

TAE684:C2BBe1

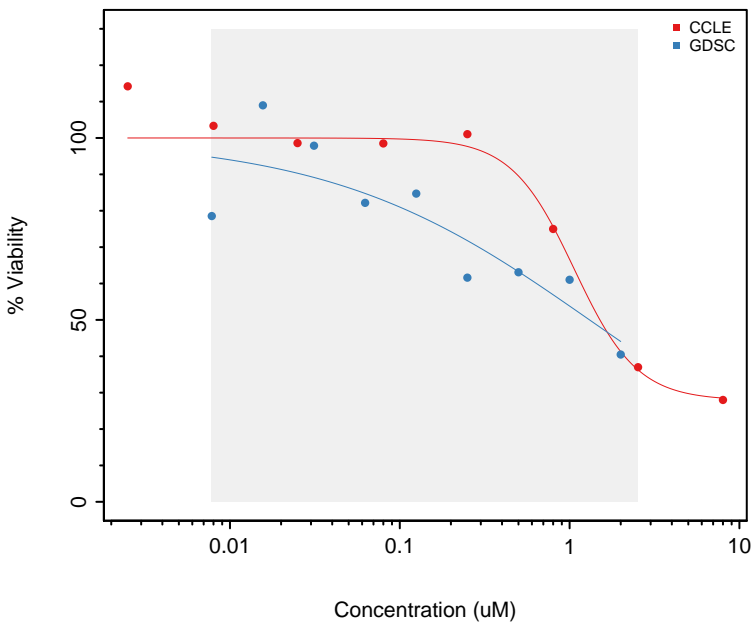

TAE684:Calu-6

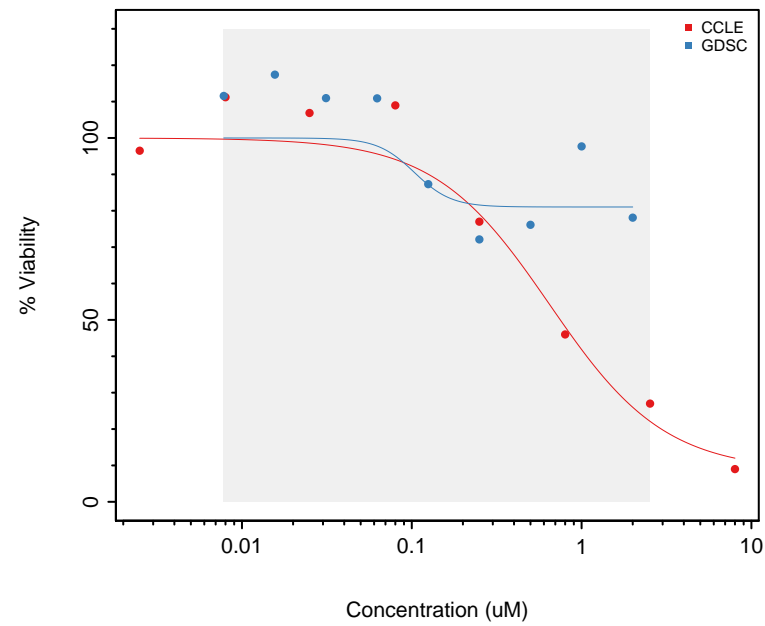

TAE684:CAS-1

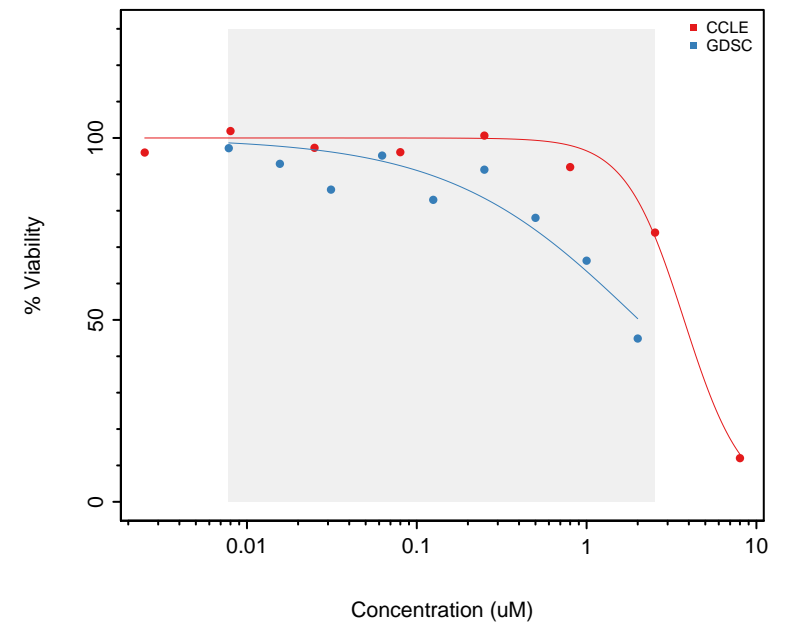

TAE684:COLO-320-HSR

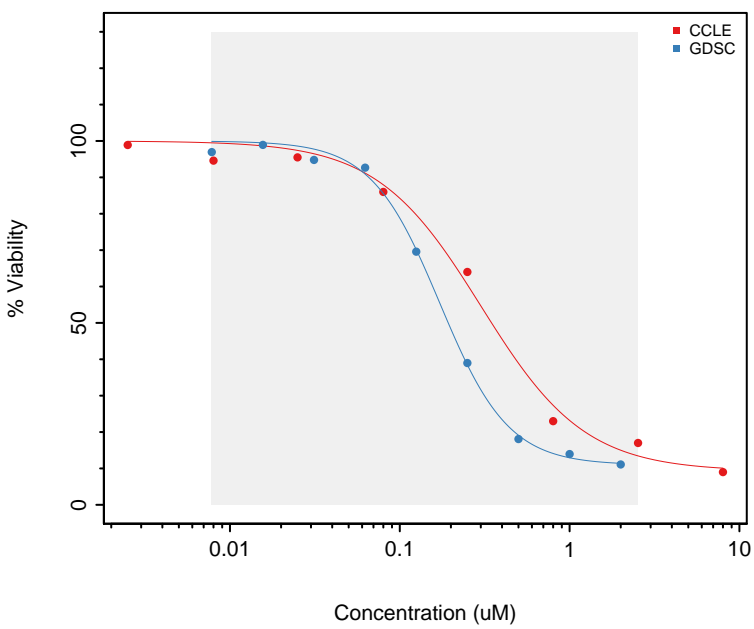

TAE684:DEL

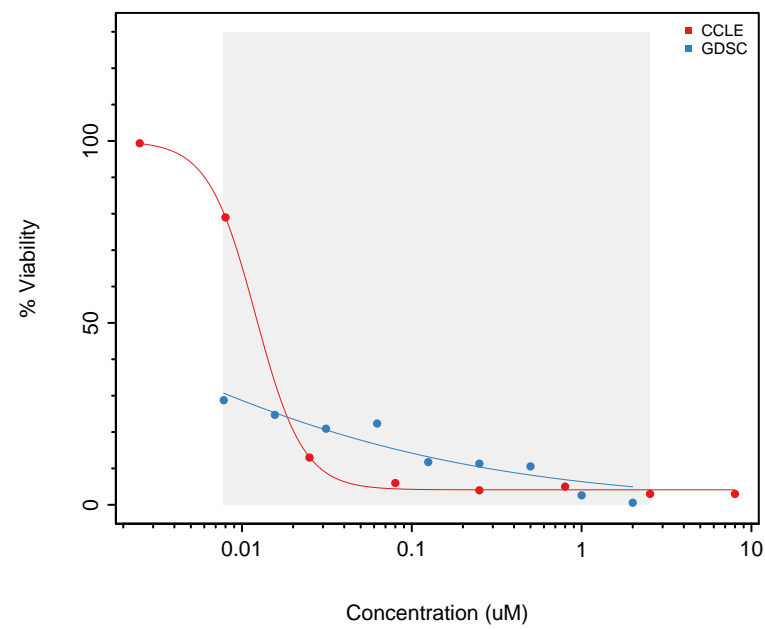

TAE684:DMS-114

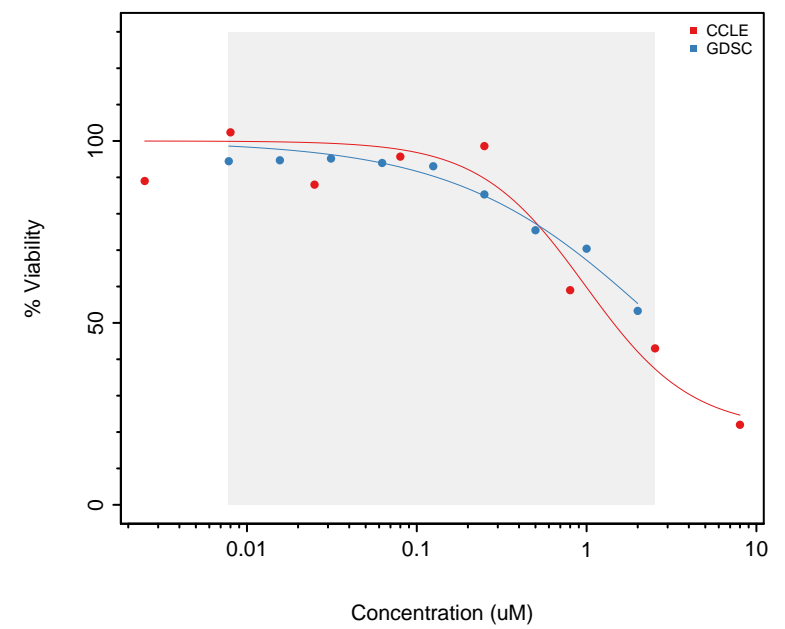

TAE684:DOHH-2

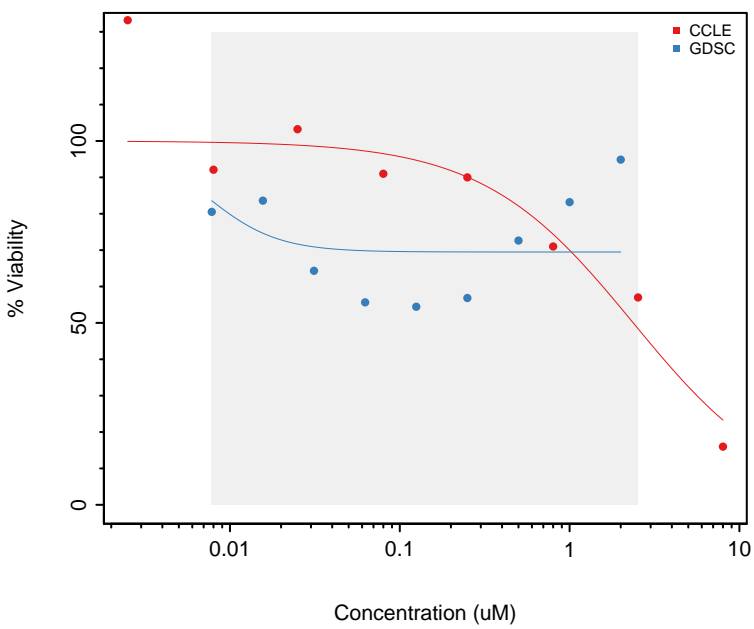

TAE684:EB2

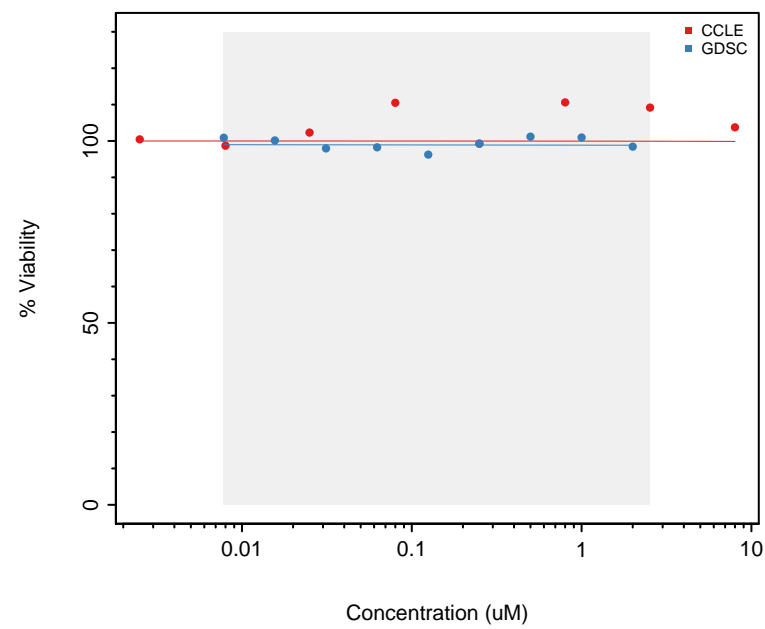

TAE684:EM-2

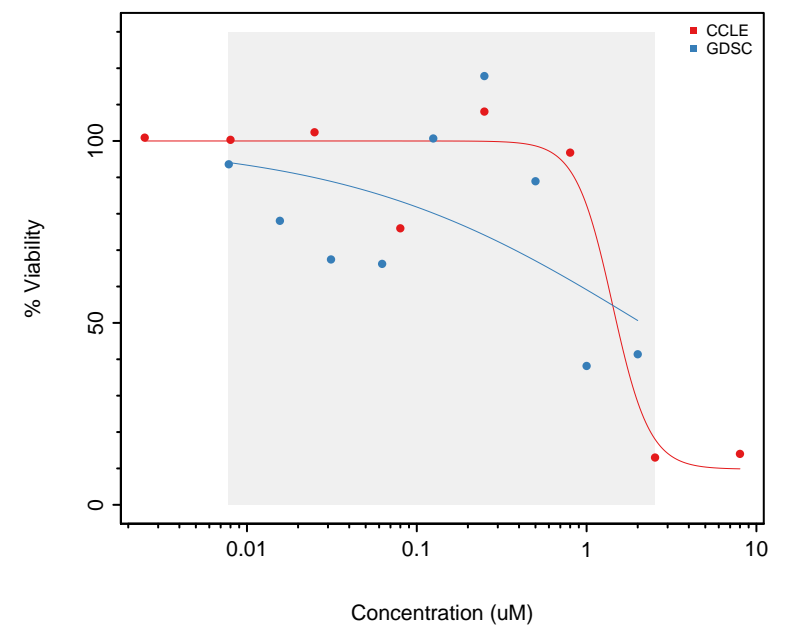



TAE684:KARPAS-299

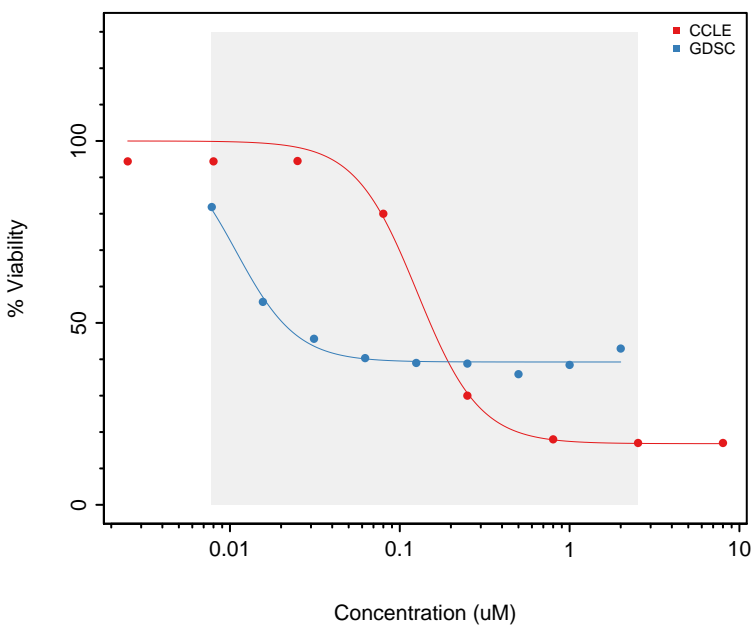

TAE684:KARPAS-422

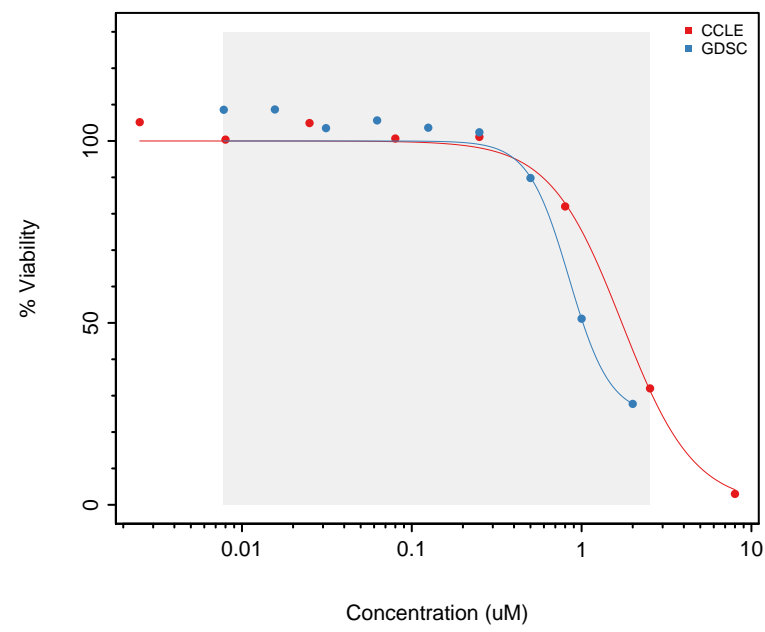

TAE684:KG-1

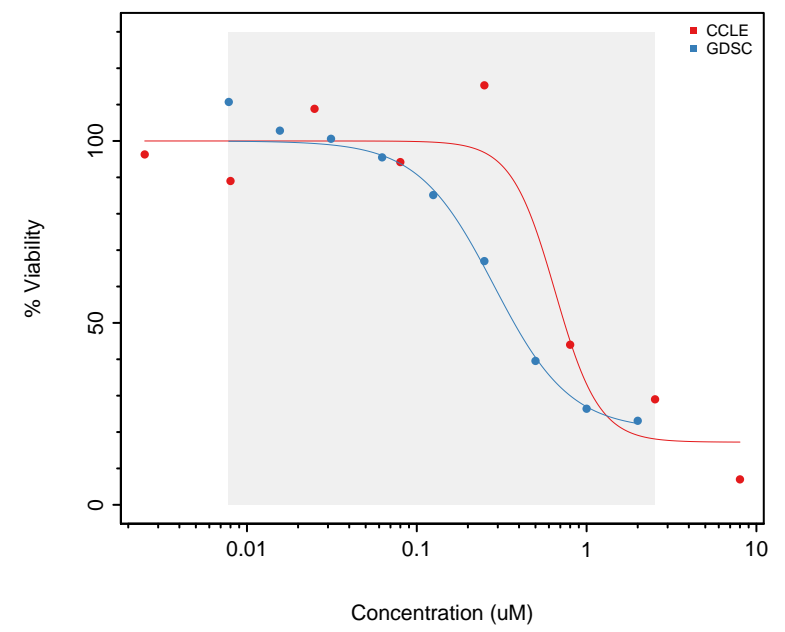

TAE684:KLE

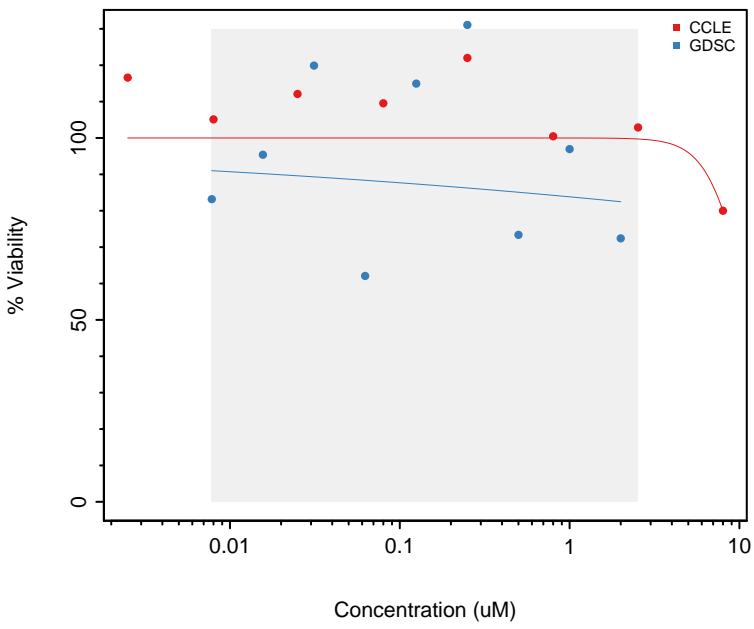

TAE684:KNS-42

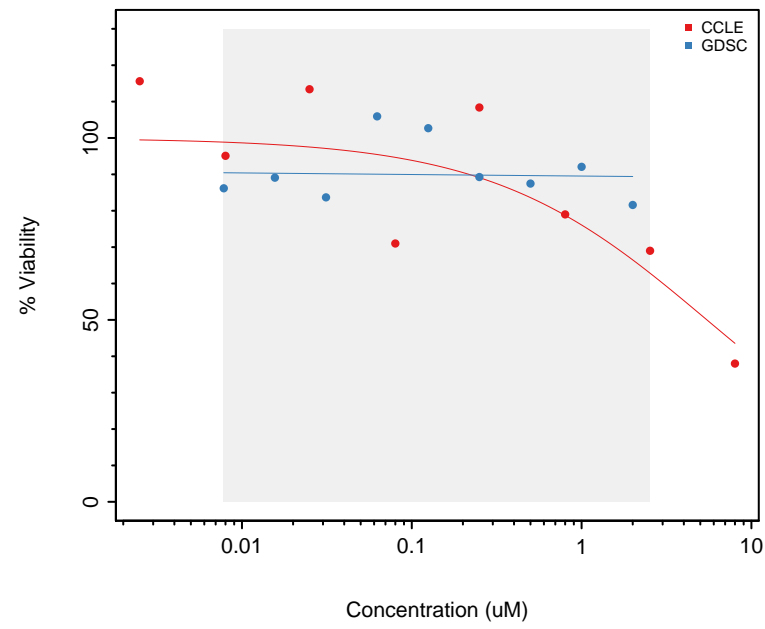

TAE684:KNS-81-FD

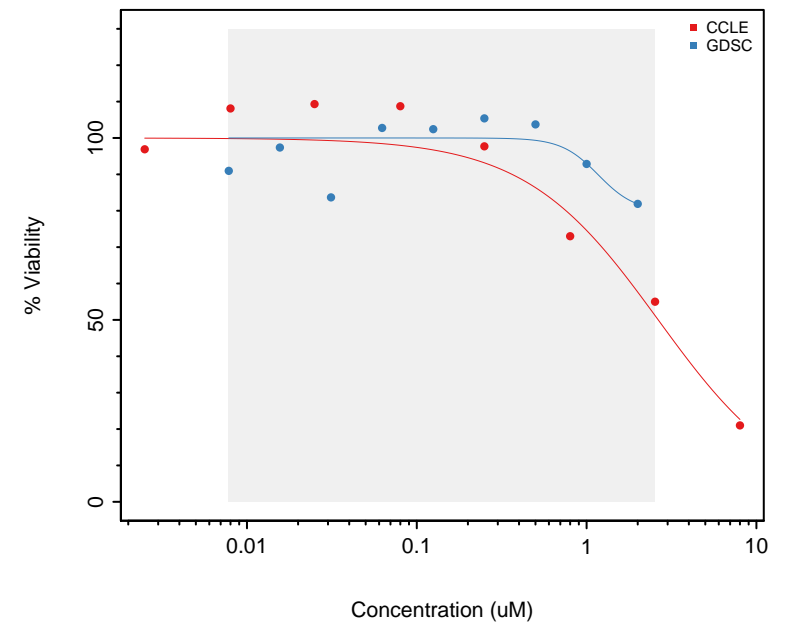

TAE684:K052

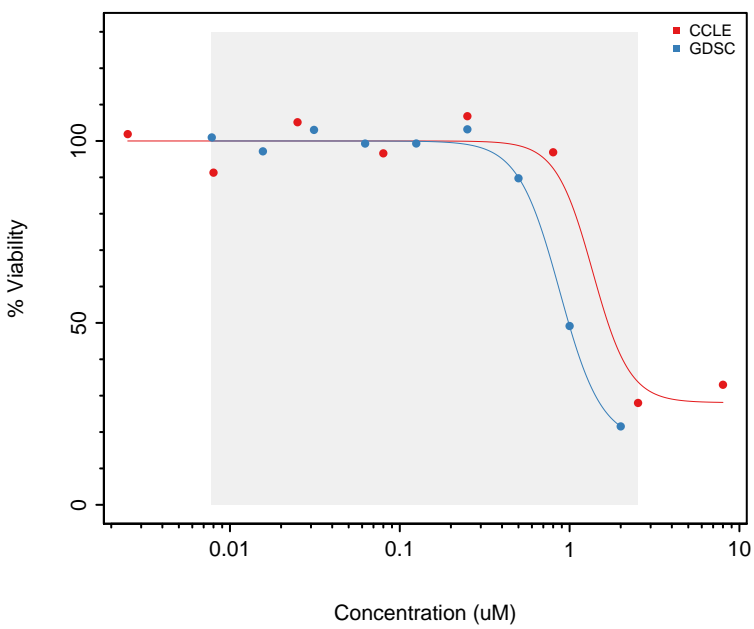

TAE684:KU812

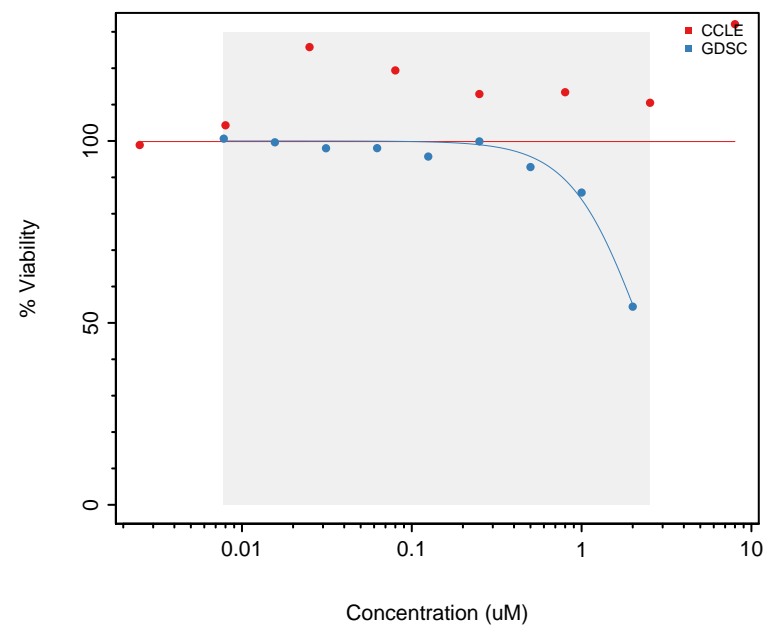

TAE684:KURAMOCHI

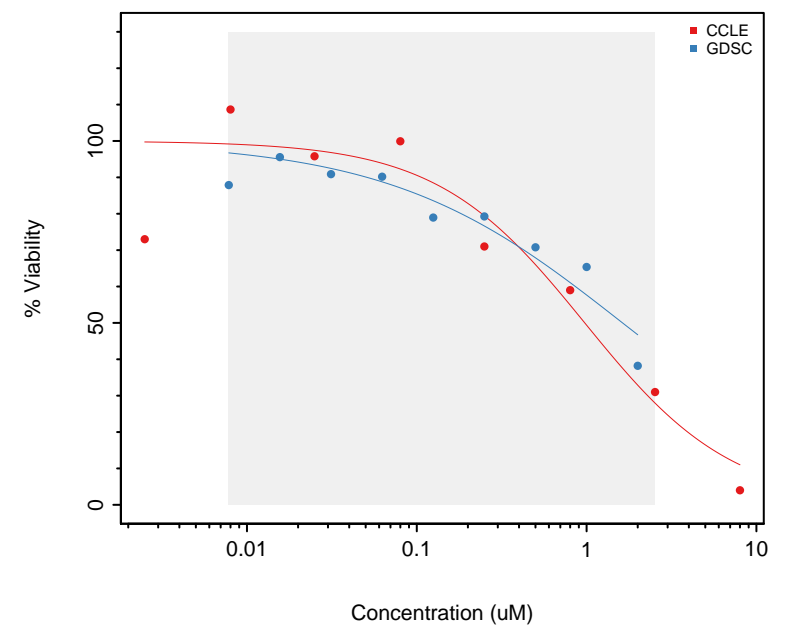

TAE684:L-363

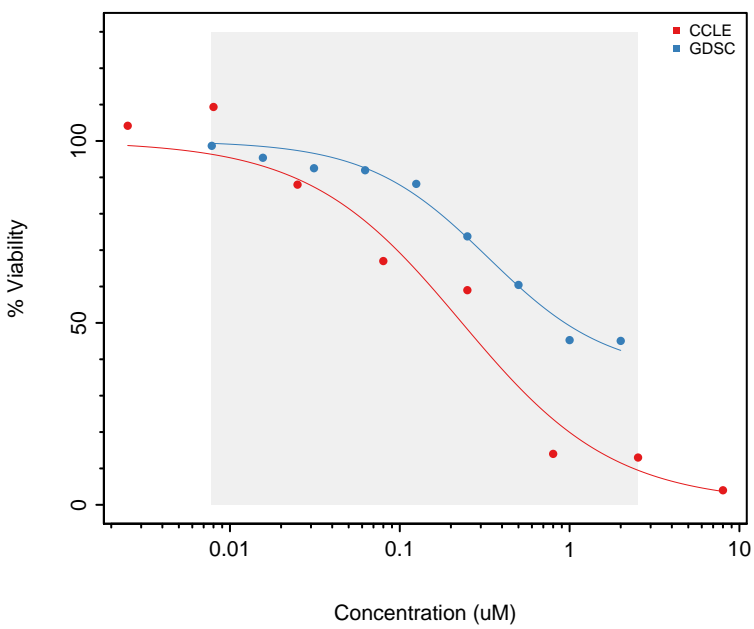

TAE684:L-428

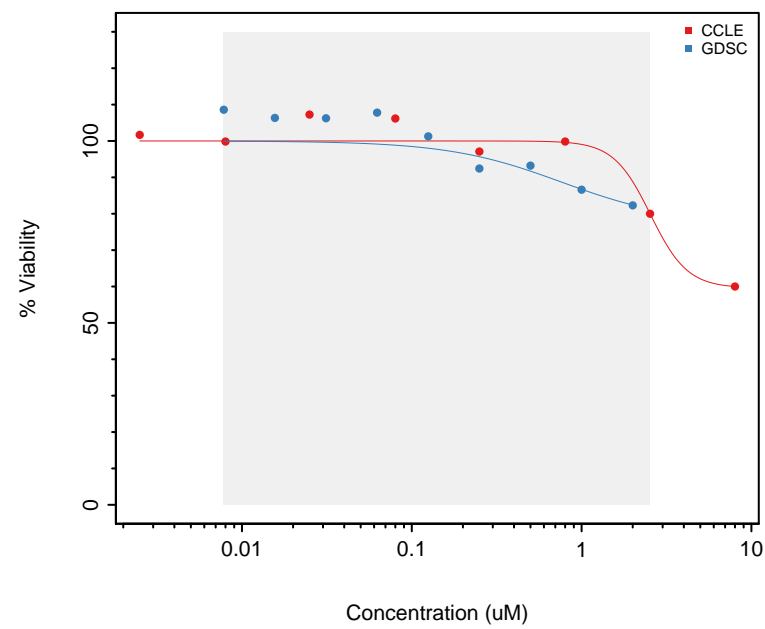

TAE684:LOXIMVI

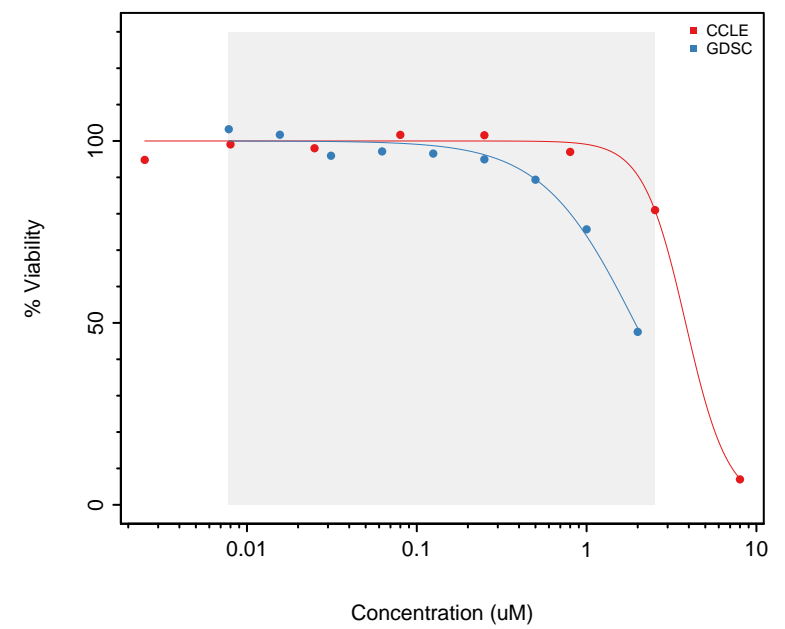



TAE684:NCI-H1581

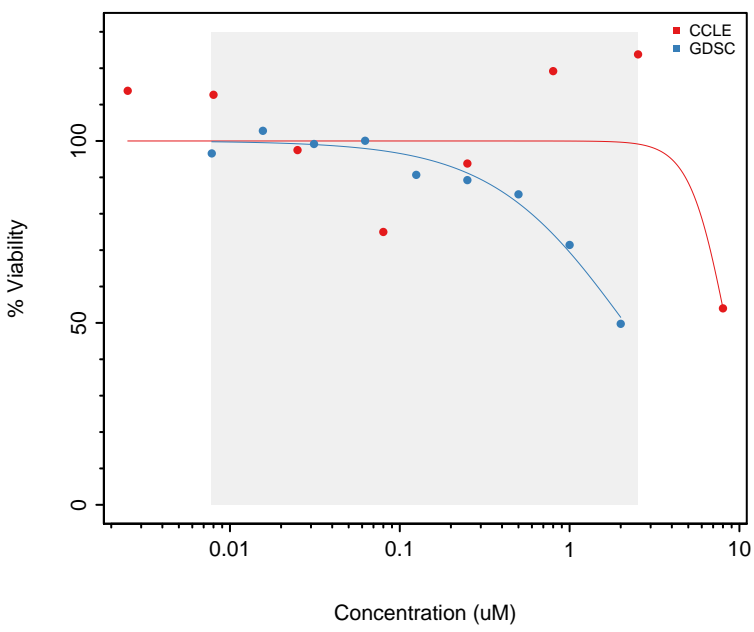

TAE684:NCI-H1648

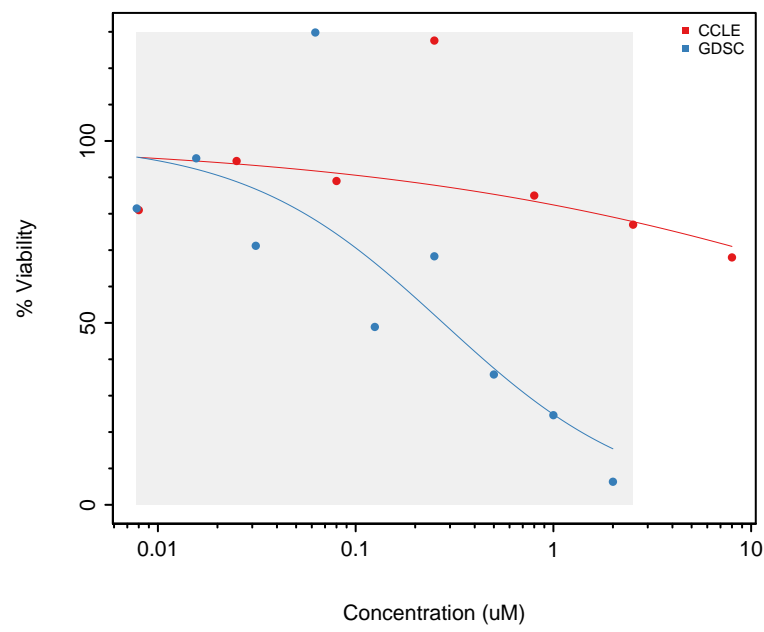

TAE684:NCI-H1666

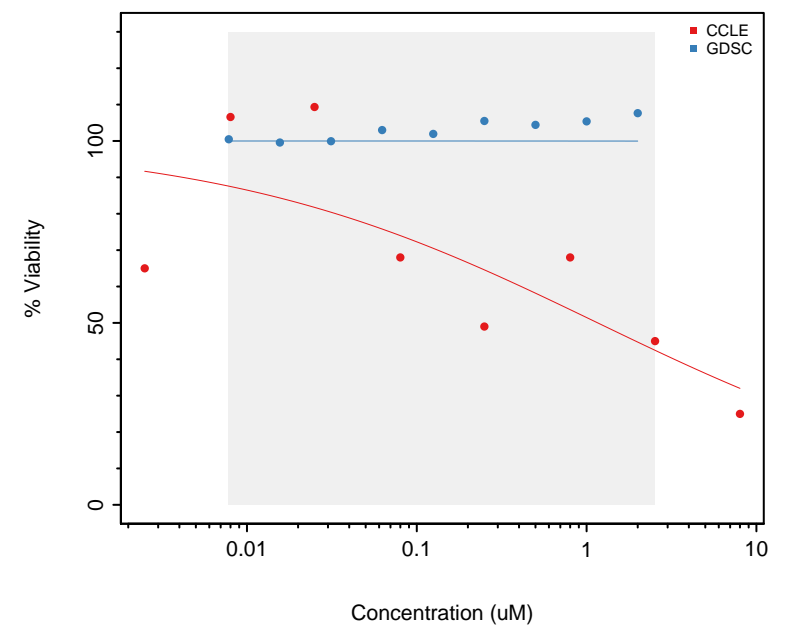

TAE684:NCI-H1694

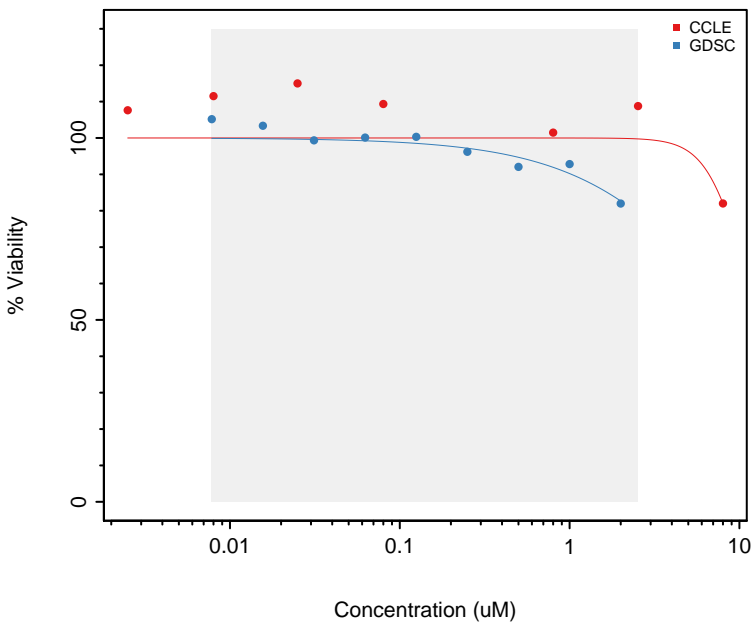

TAE684:NCI-H1975

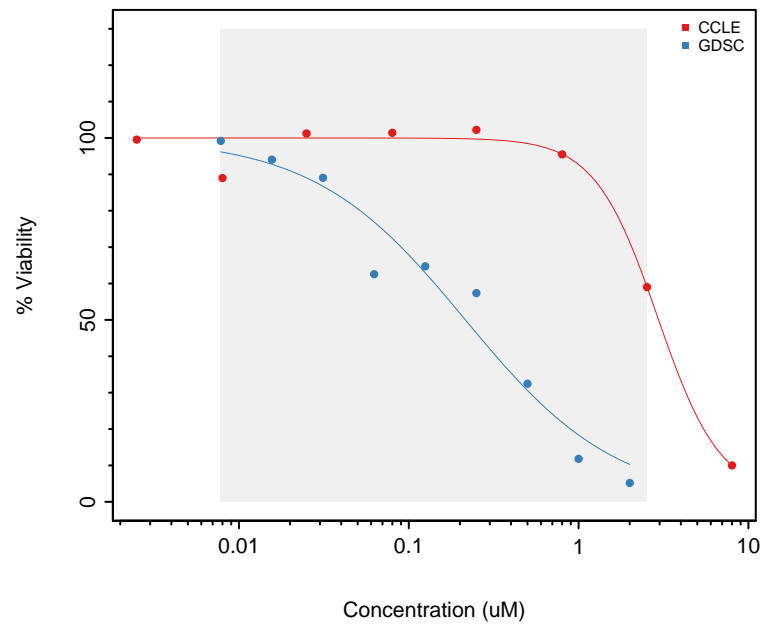

TAE684:NCI-H226

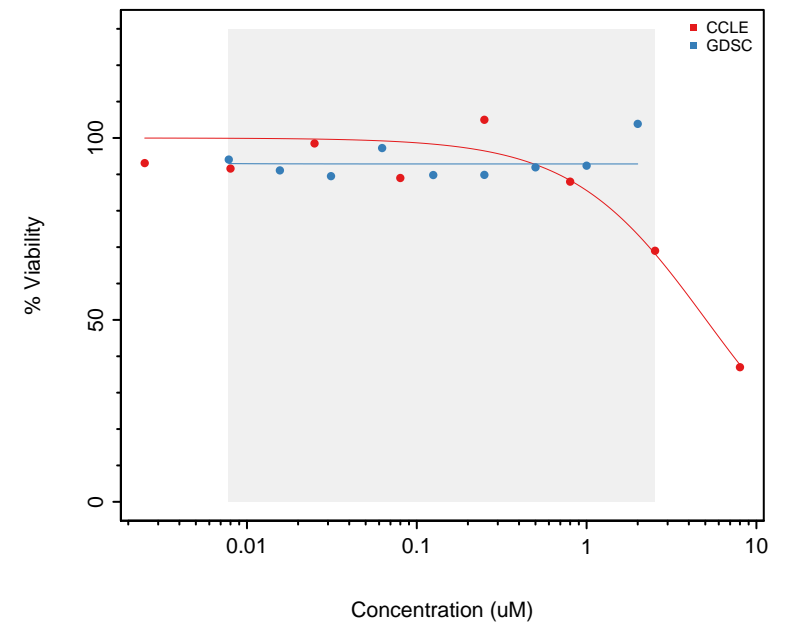

TAE684:NCI-H23

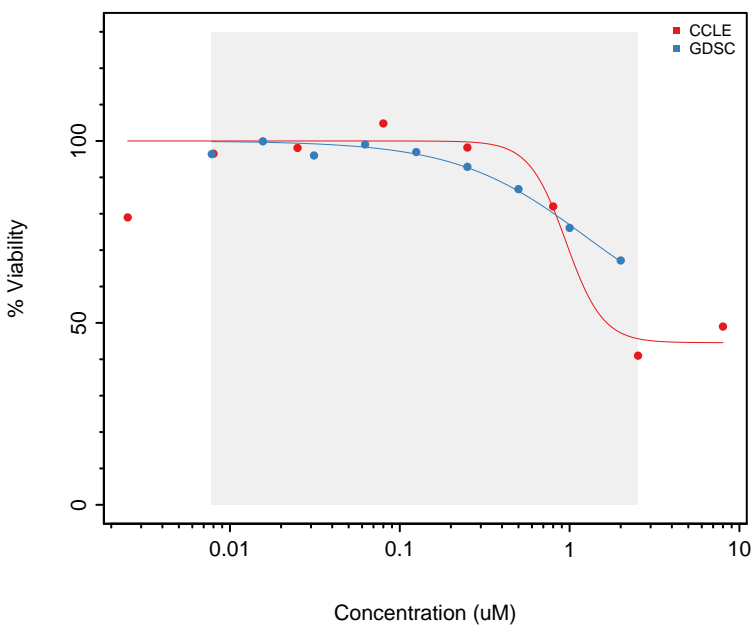

TAE684:NCI-H747

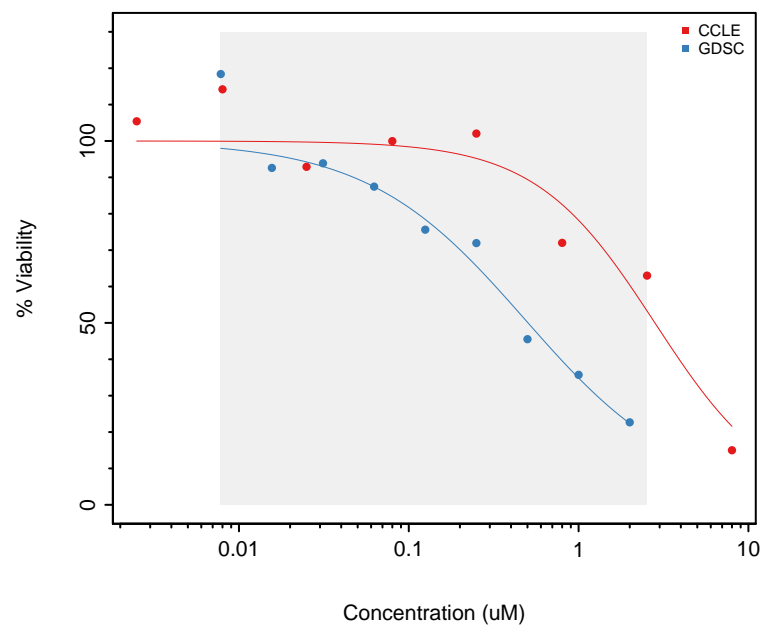

TAE684:OCI-AML2

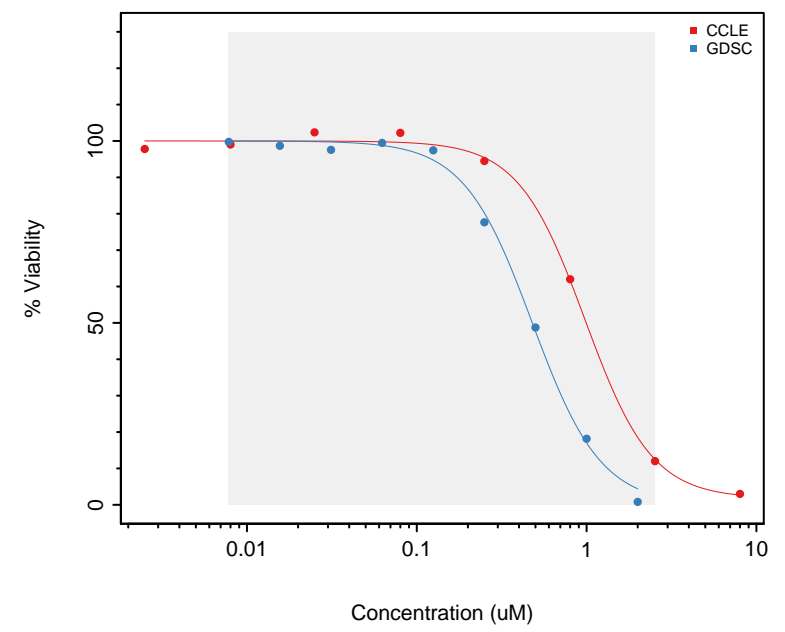

TAE684:ONS-76

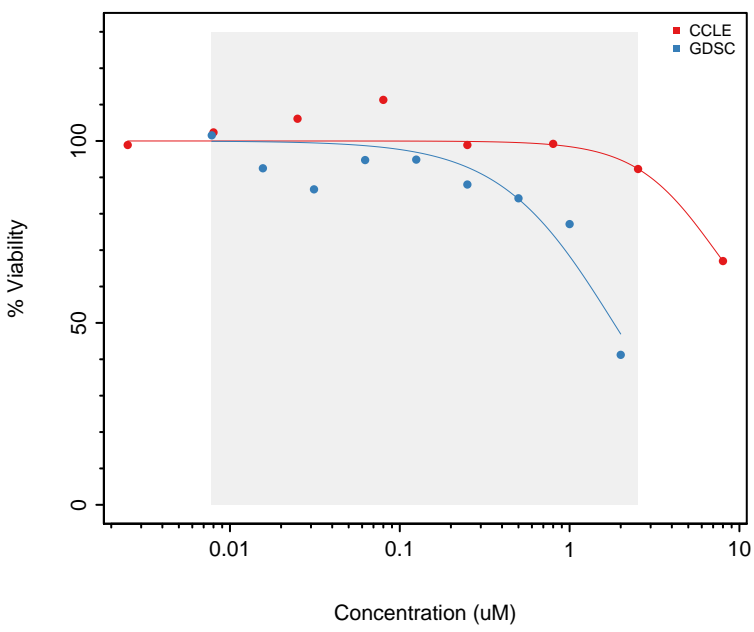

TAE684:OPM-2

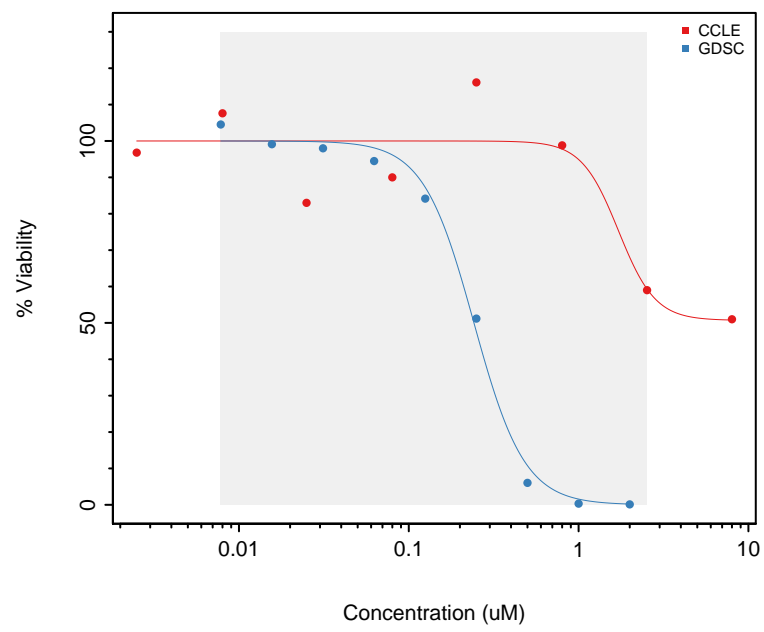

TAE684:OVCAR-4

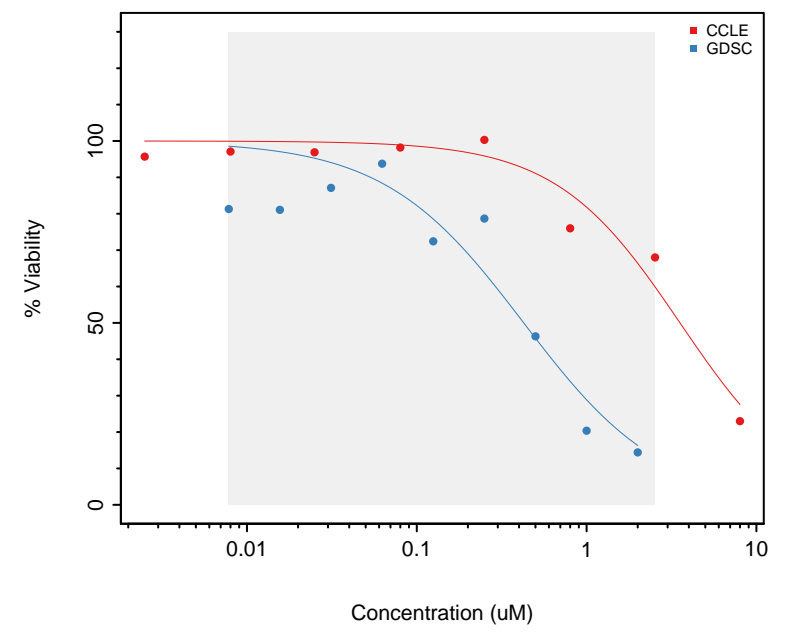



TAE684:P31-FUJ

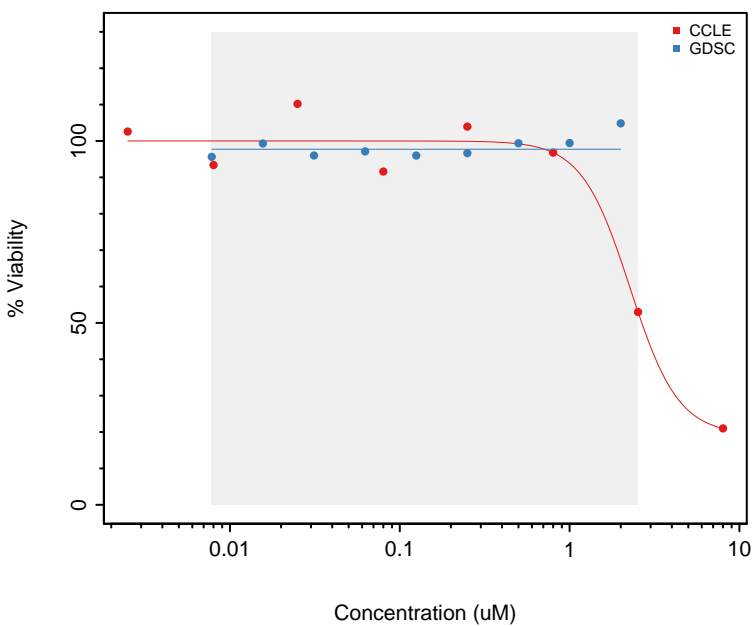

TAE684:PSN1

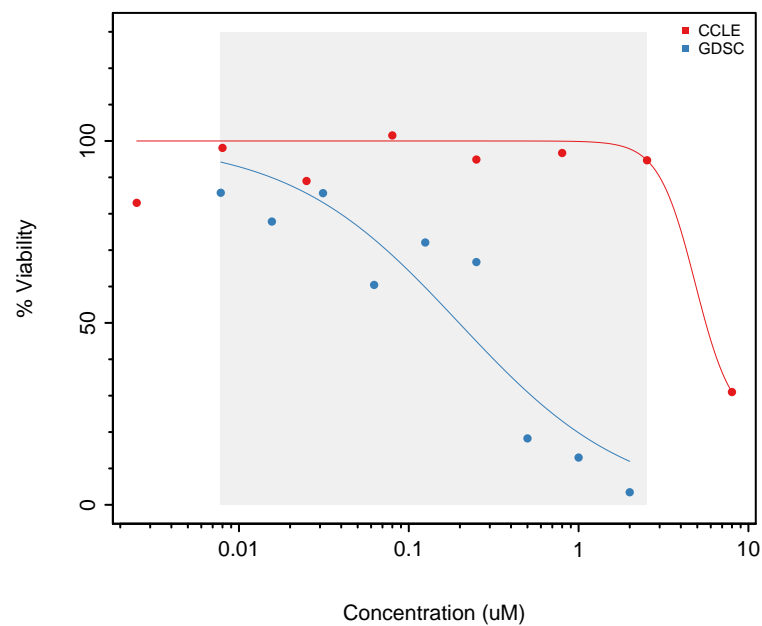

TAE684:Raji

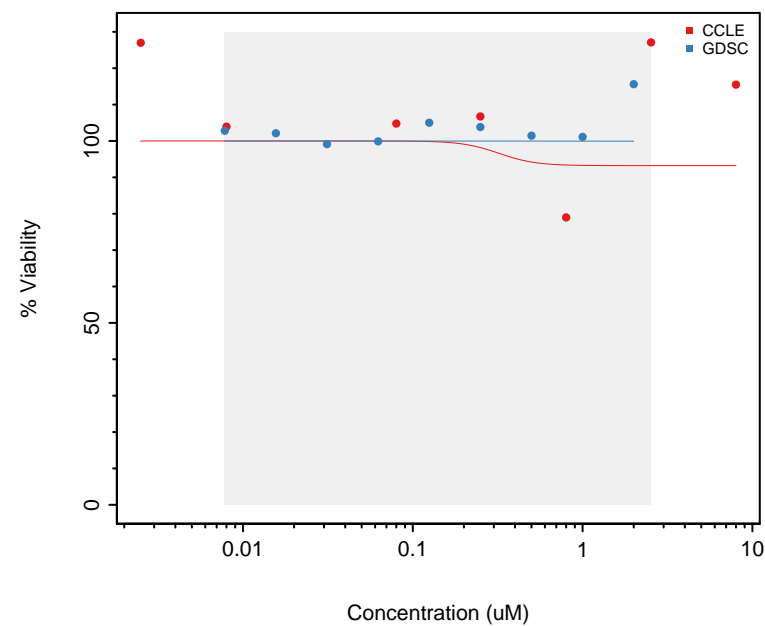

TAE684:REH

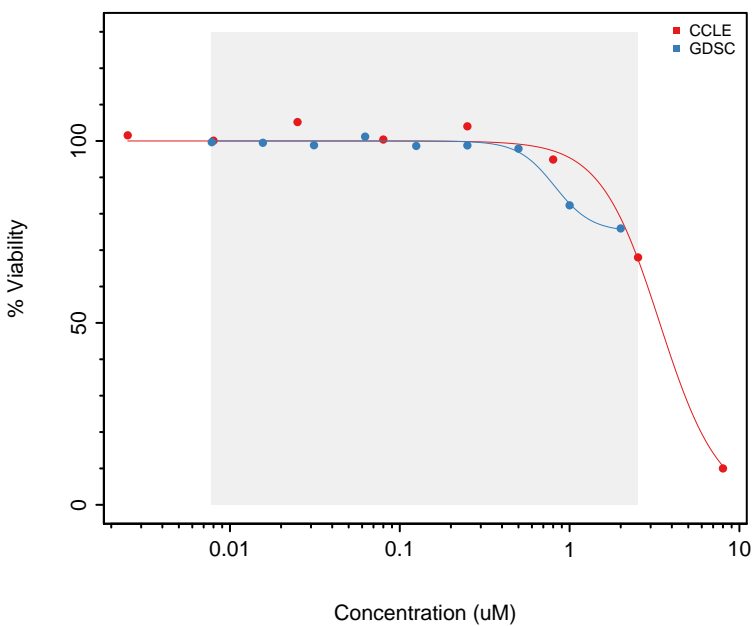

TAE684:RKO

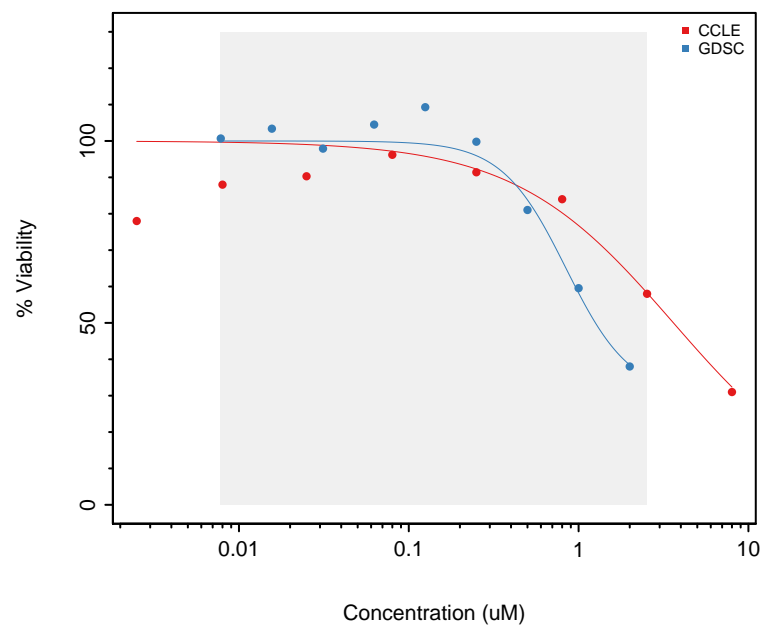

TAE684:RL95-2

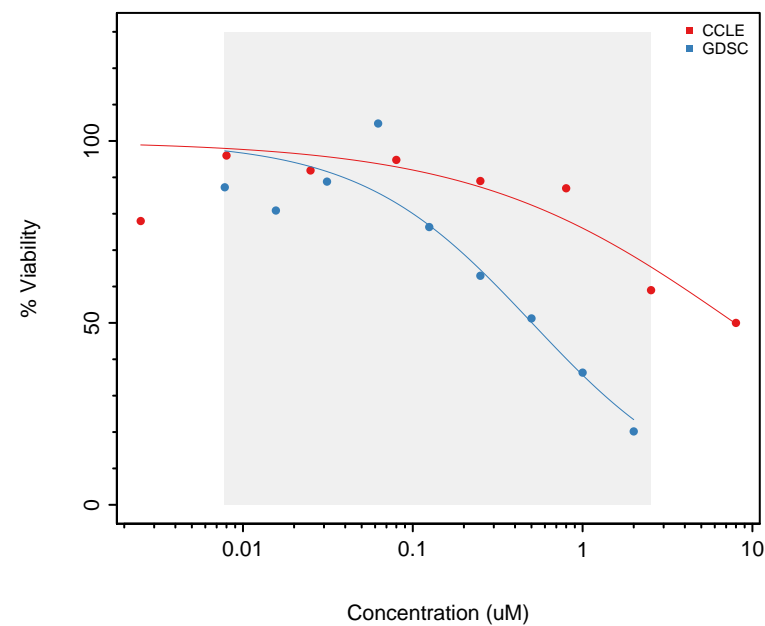

TAE684:RPMI-8402

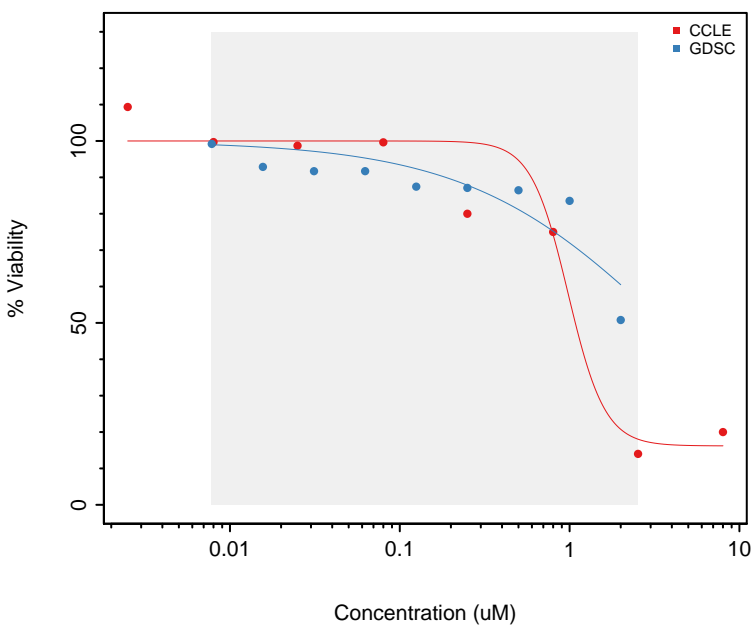

TAE684:SF126

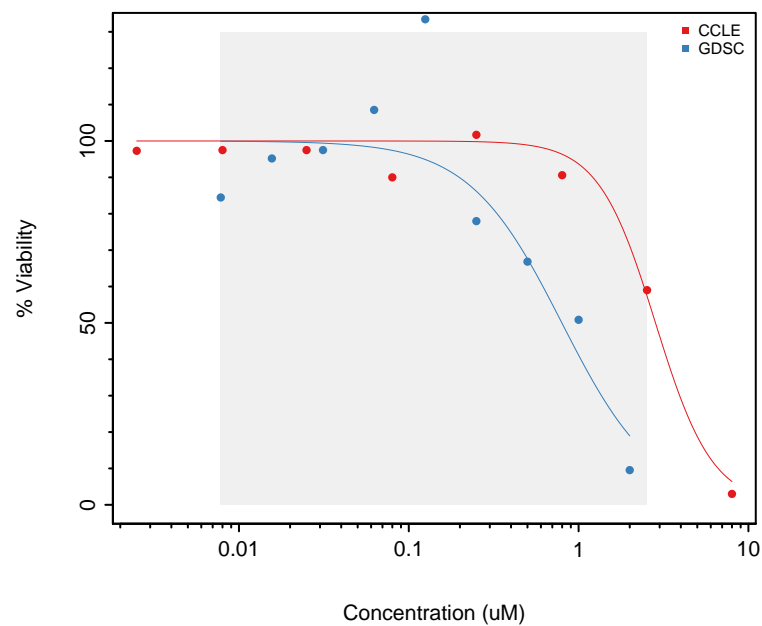

TAE684:SHP-77

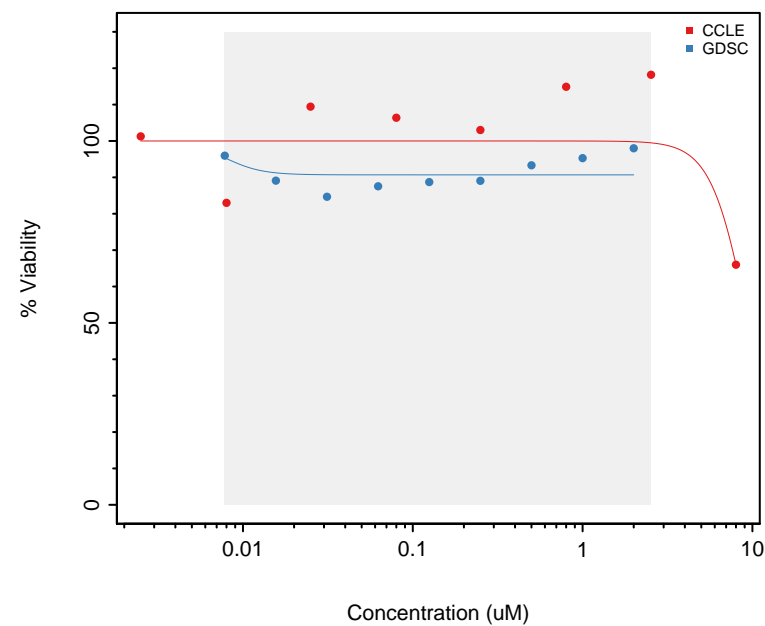

TAE684:SIG-M5

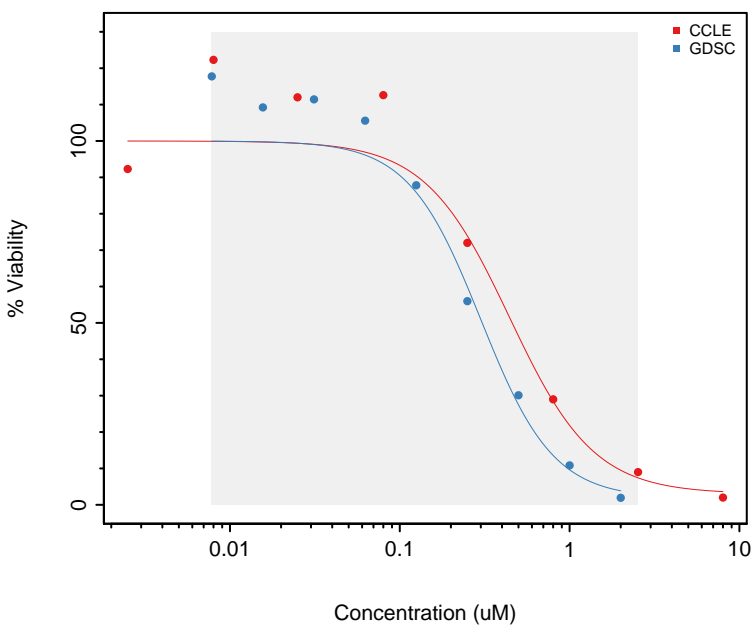

TAE684:SIMA

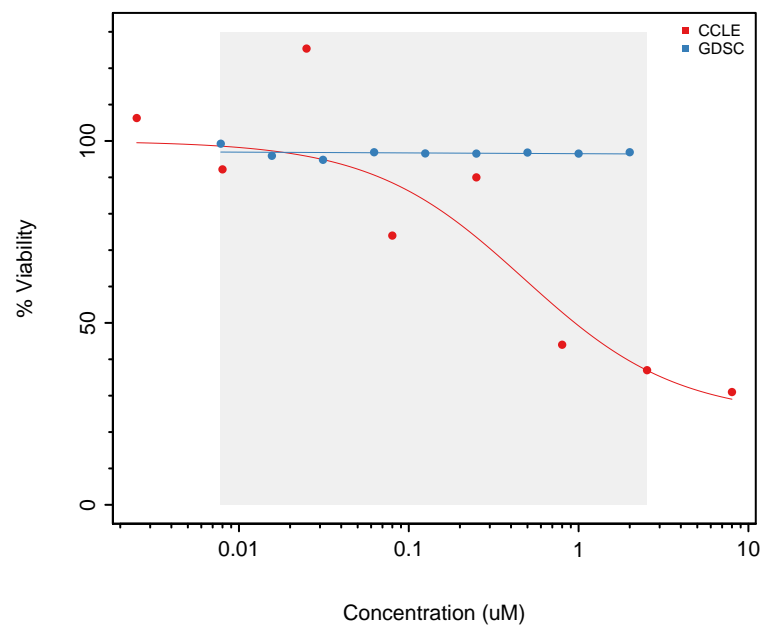

TAE684:SJSA-1

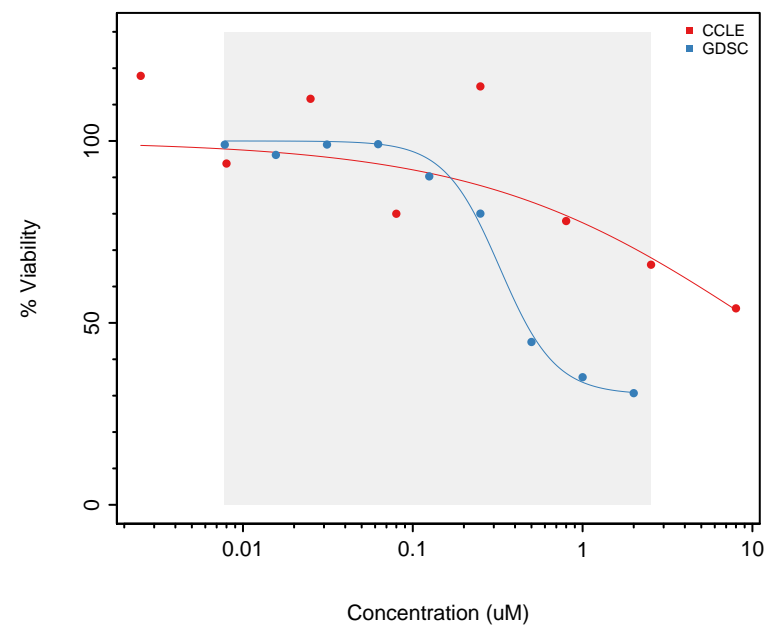

TAE684:SK-LMS-1

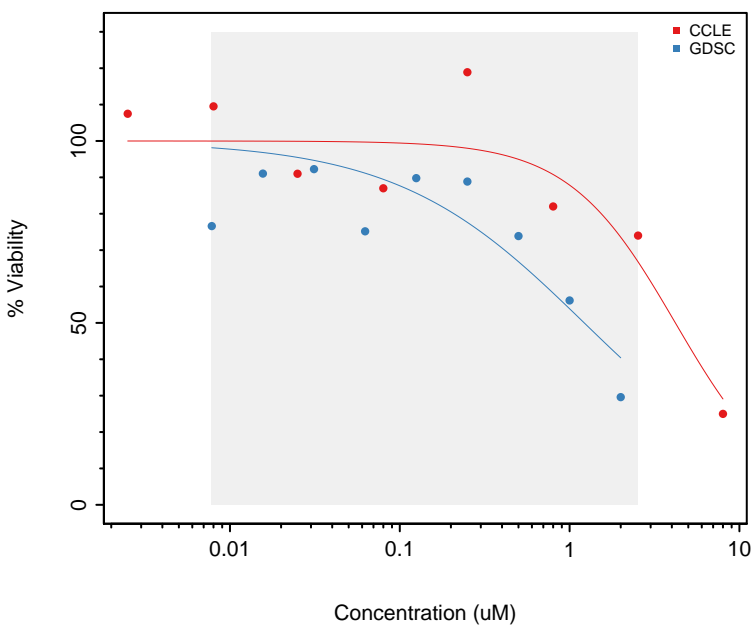

TAE684:SK-MEL-2

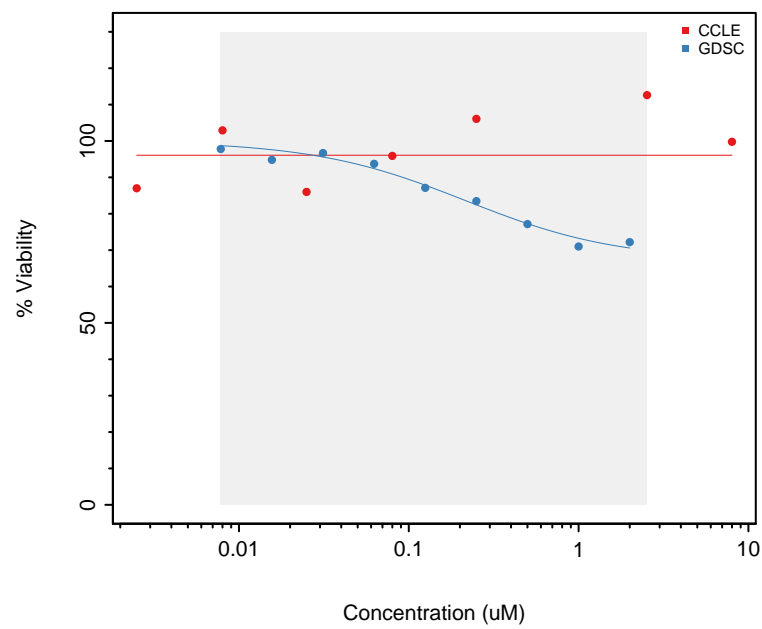

TAE684:SK-MM-2

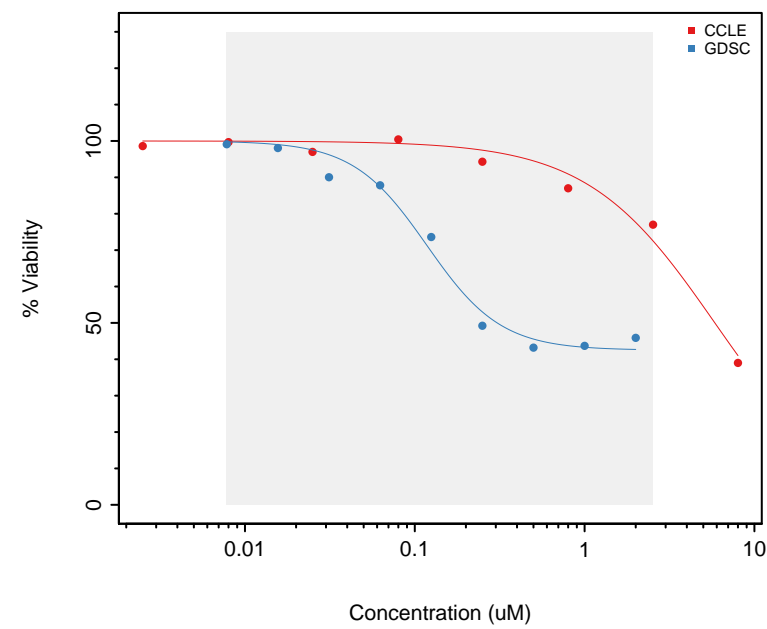

TAE684:SK-N-DZ

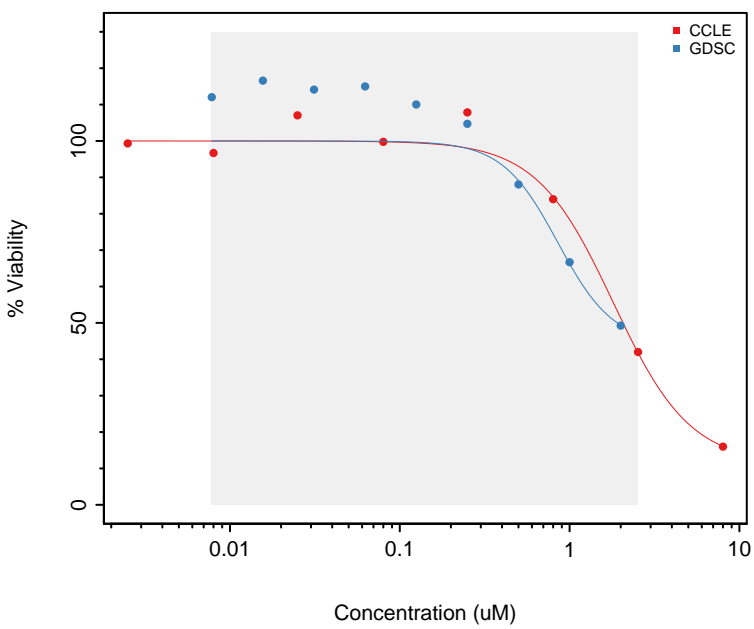

TAE684:NCI-SNU-1

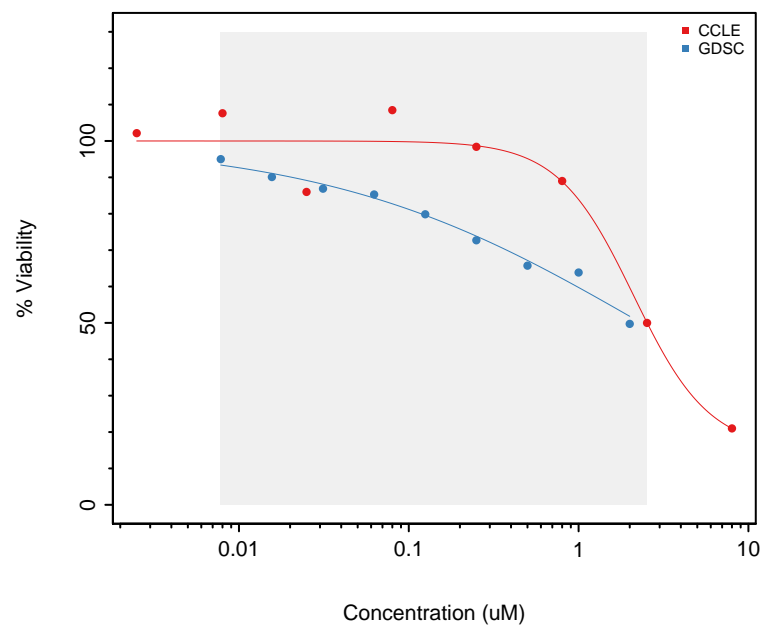

TAE684:NCI-SNU-16

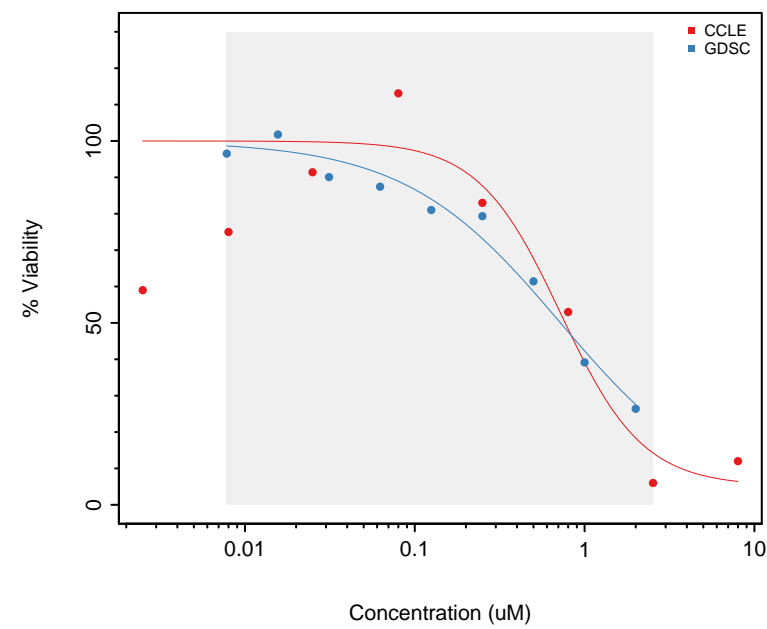

TAE684:SNU-C2B

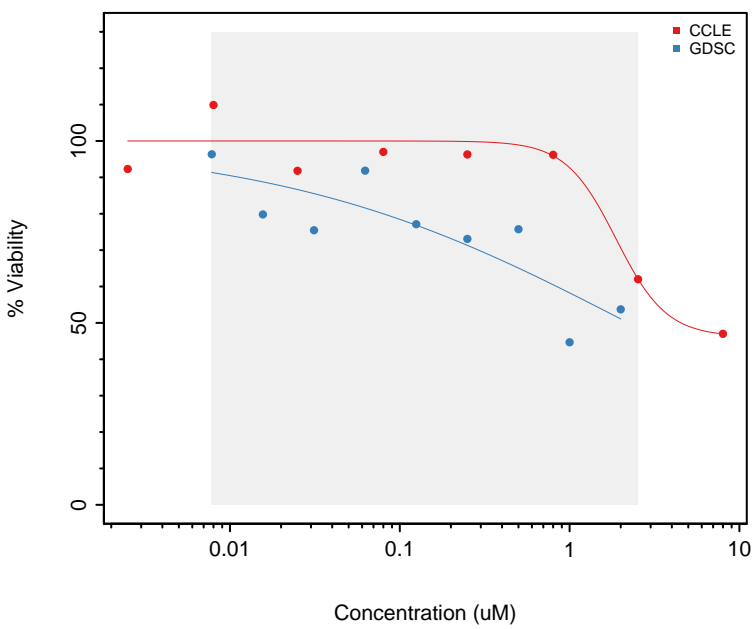

TAE684:SUP-T1

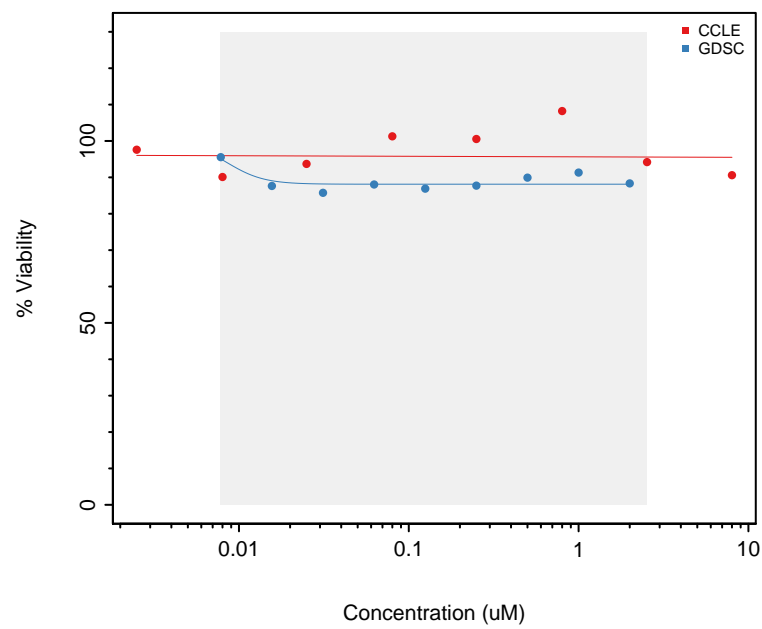

TAE684:TE-1

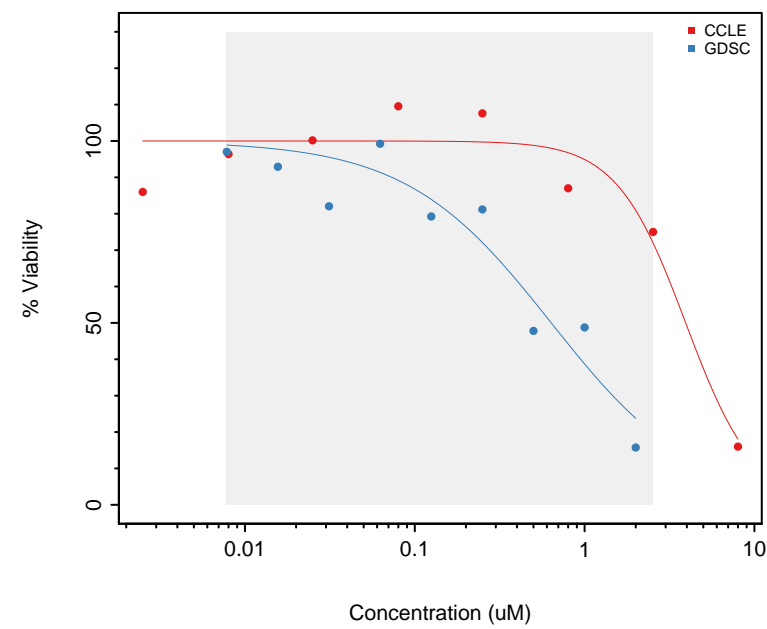

TAE684:TE-15

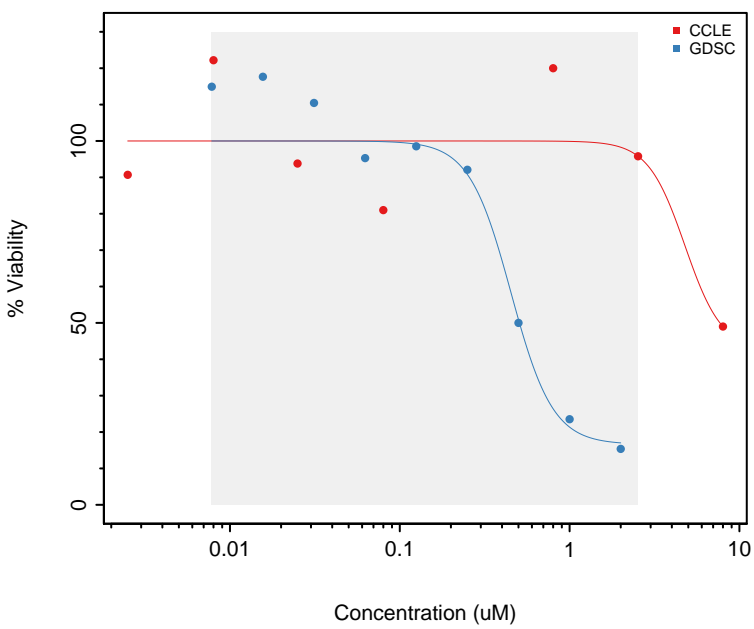

TAE684:TE-5

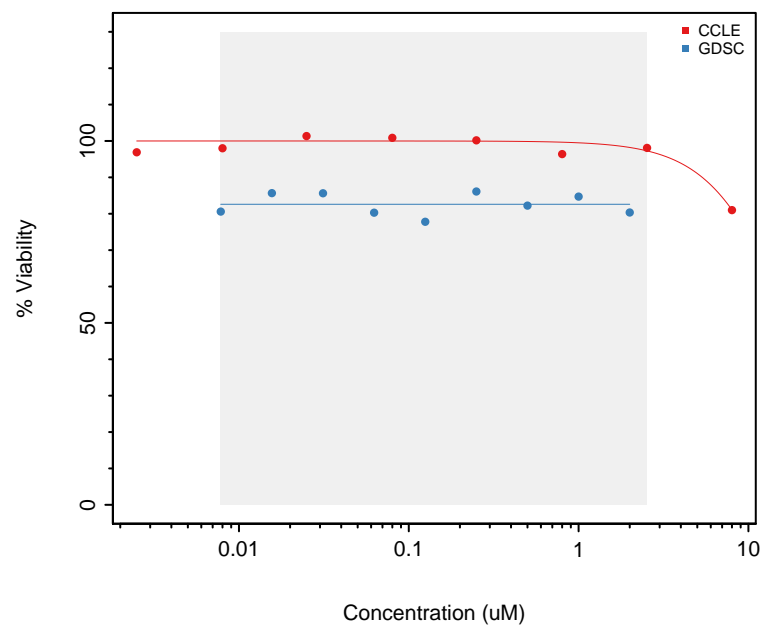

TAE684:TE-9

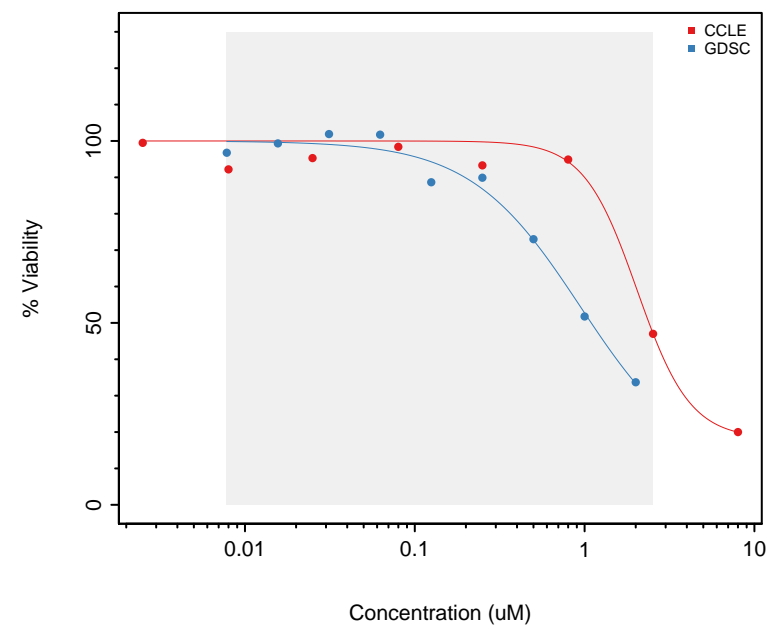

TAE684:U-87-MG

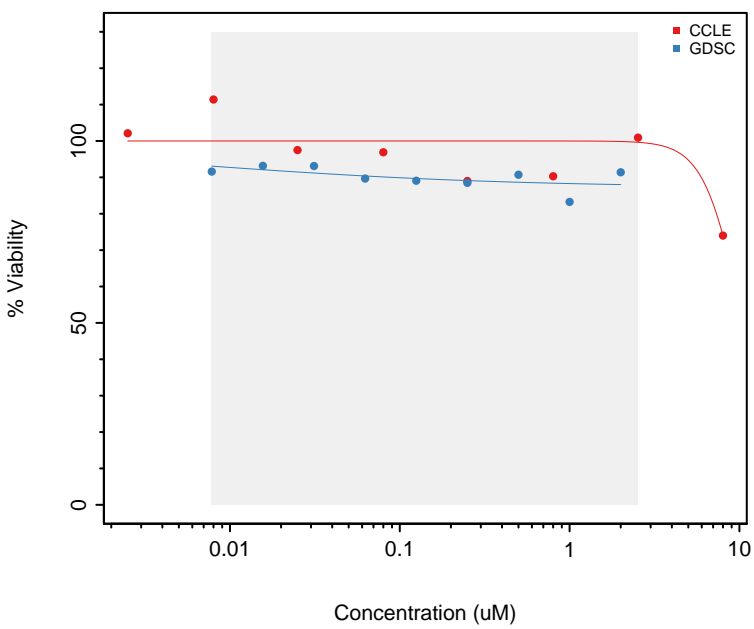

TAE684:UACC-257

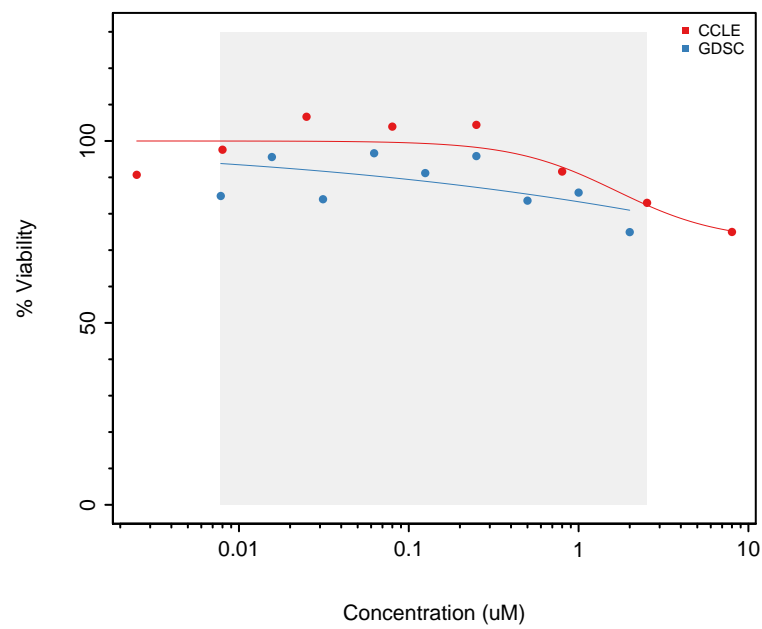

TAE684:UACC-812

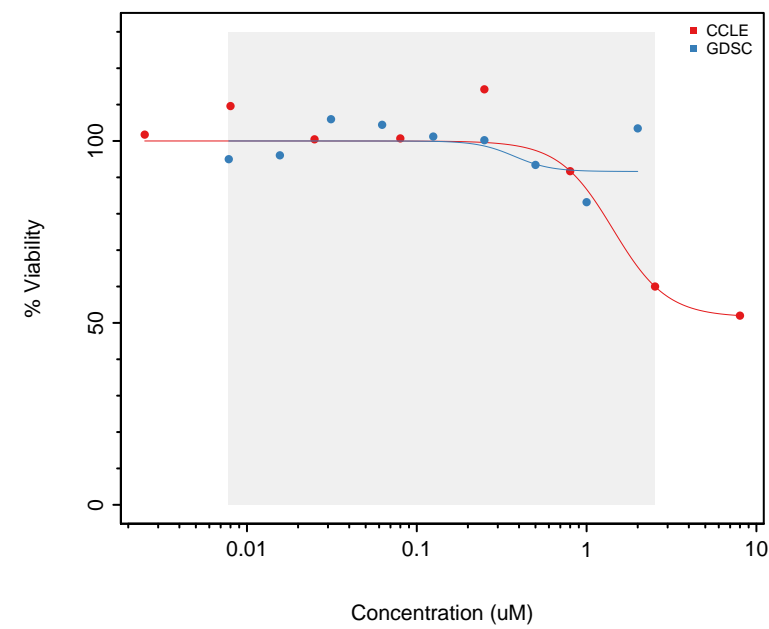

Erlotinib:697

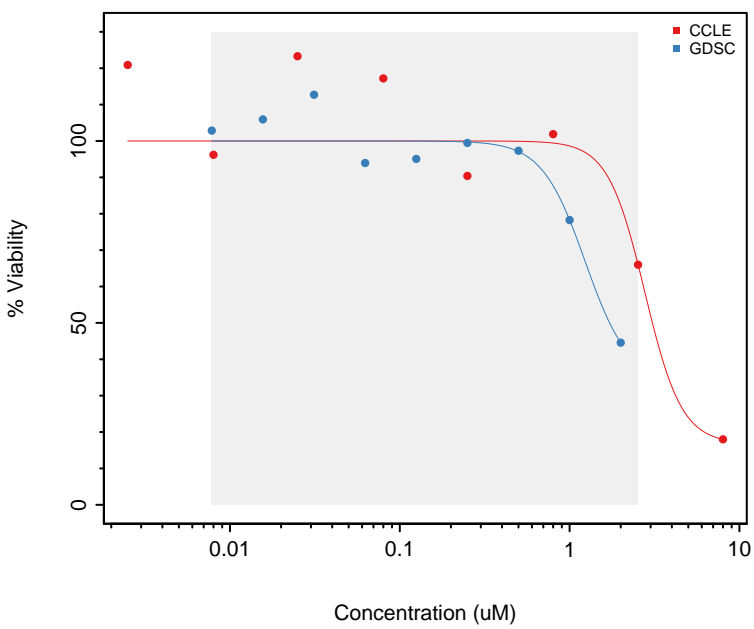

Erlotinib:8-MG-BA

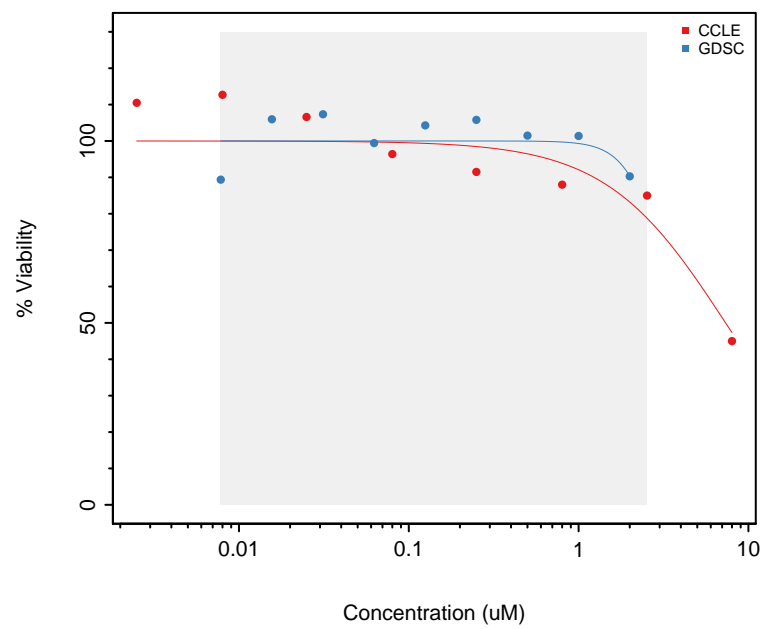

Erlotinib:A253

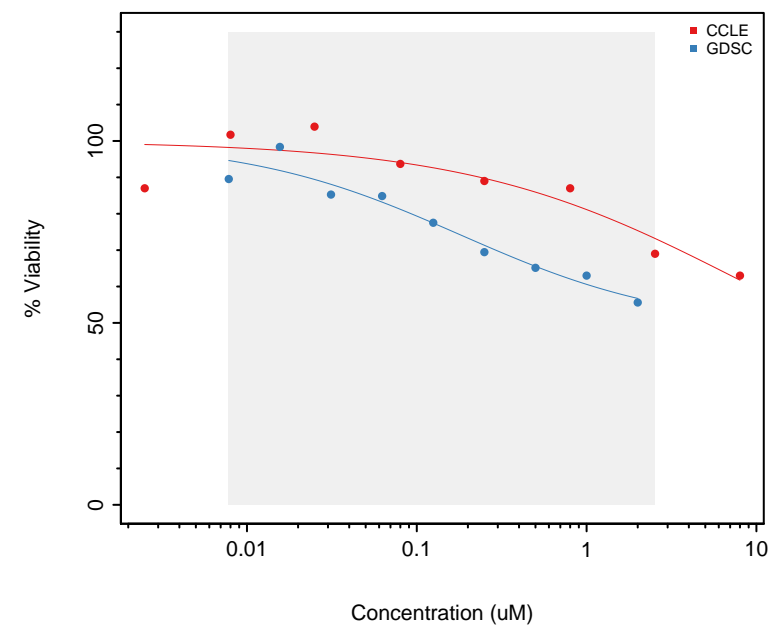

Erlotinib:BL-41

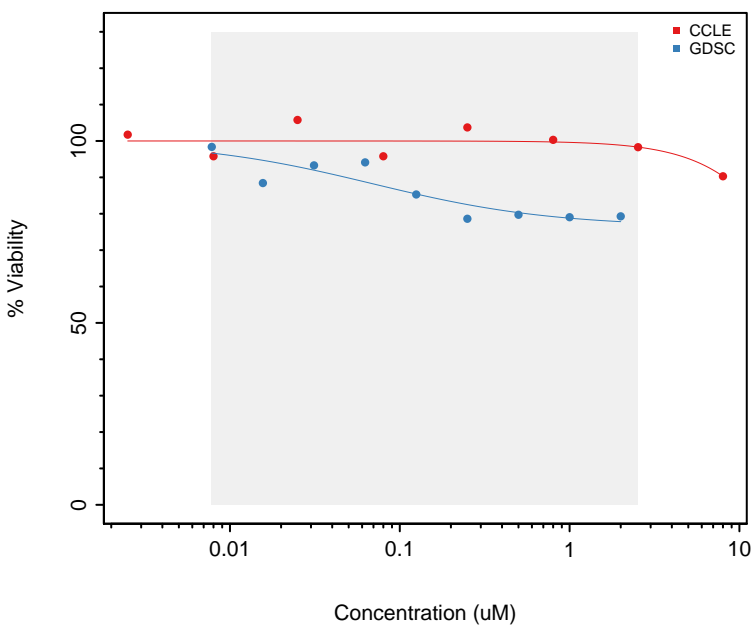

Erlotinib:BL-70

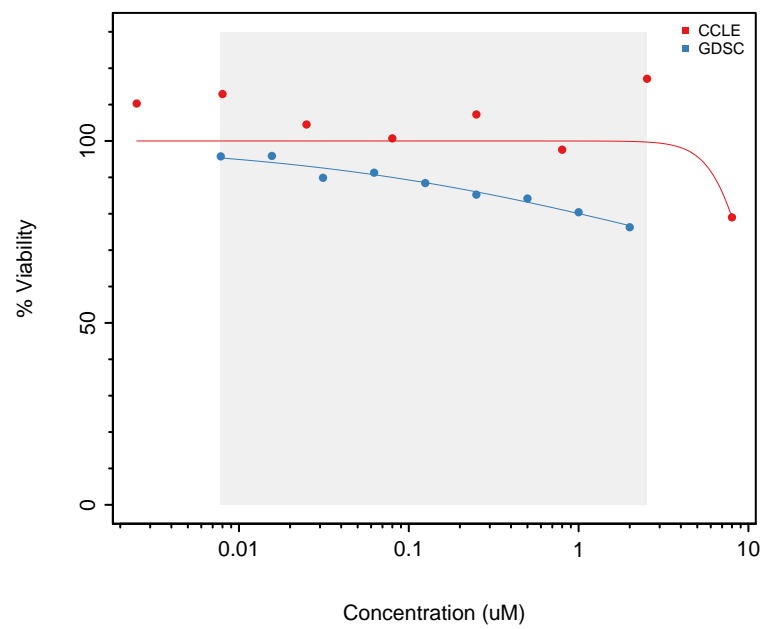

Erlotinib:BT-474

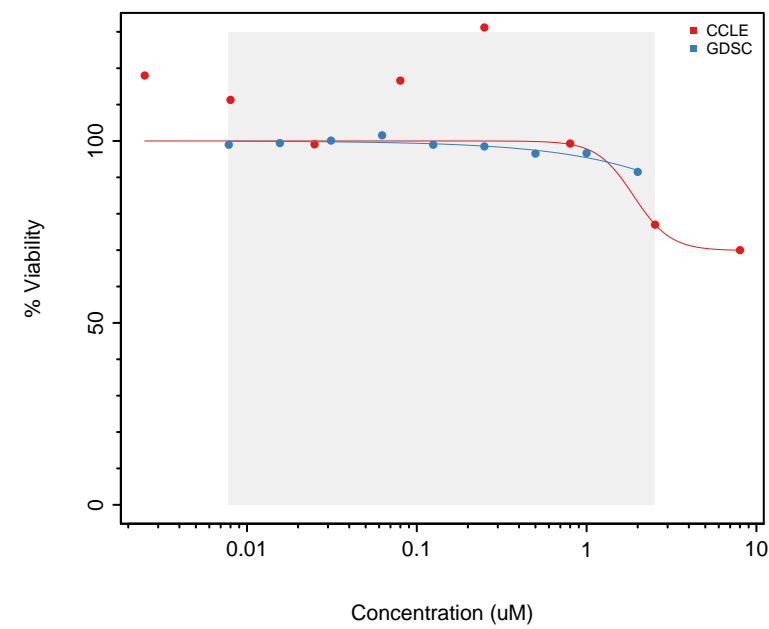

Erlotinib:C2BBe1

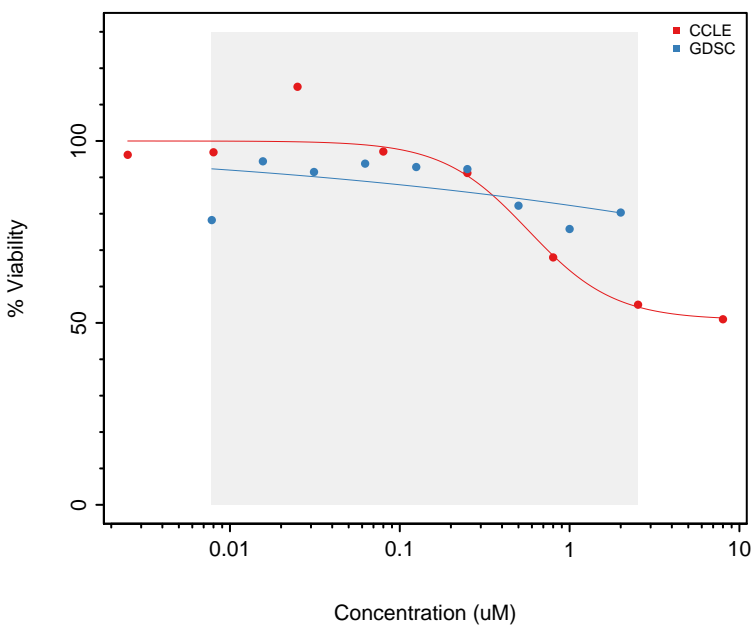

Erlotinib:Calu-6

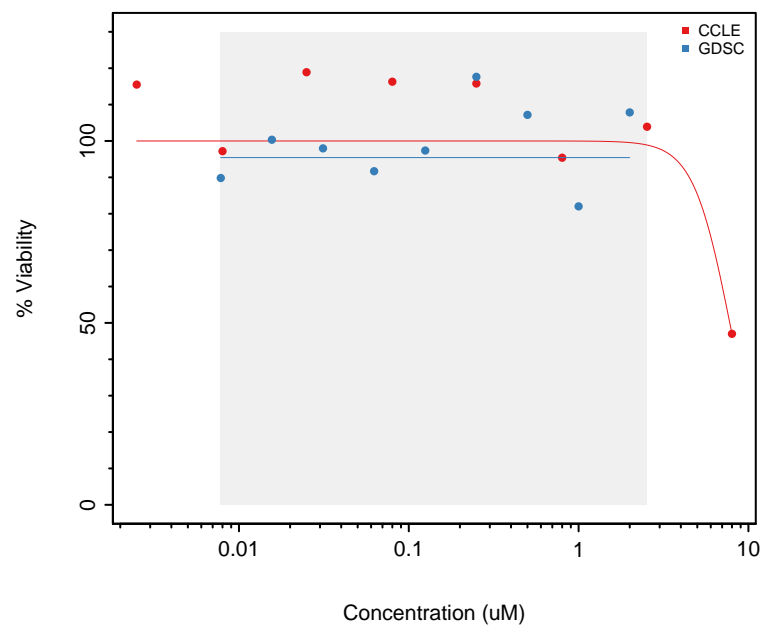

Erlotinib:COLO-320-HSR

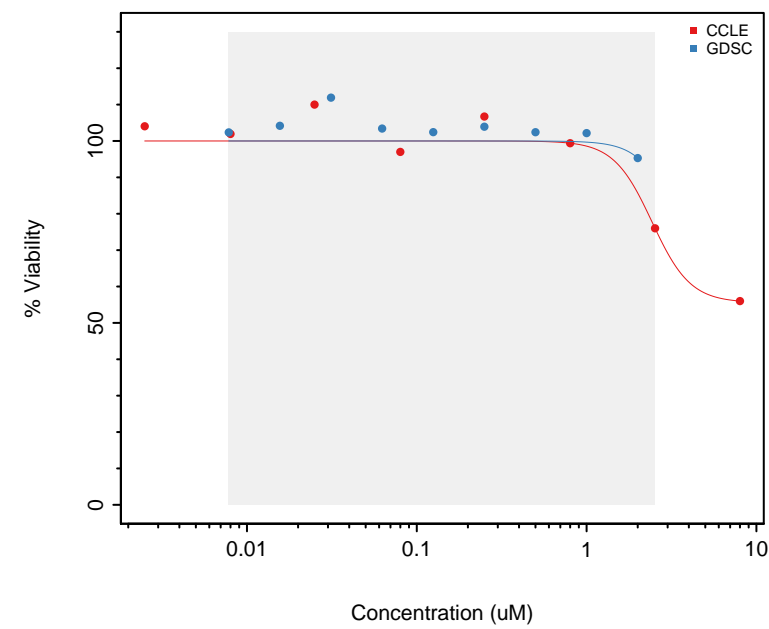

Erlotinib:DEL

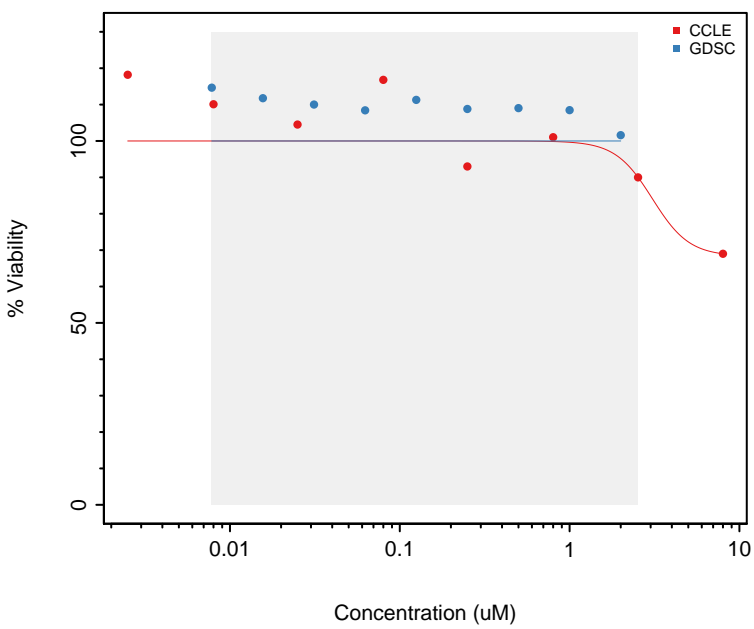

Erlotinib:DMS-114

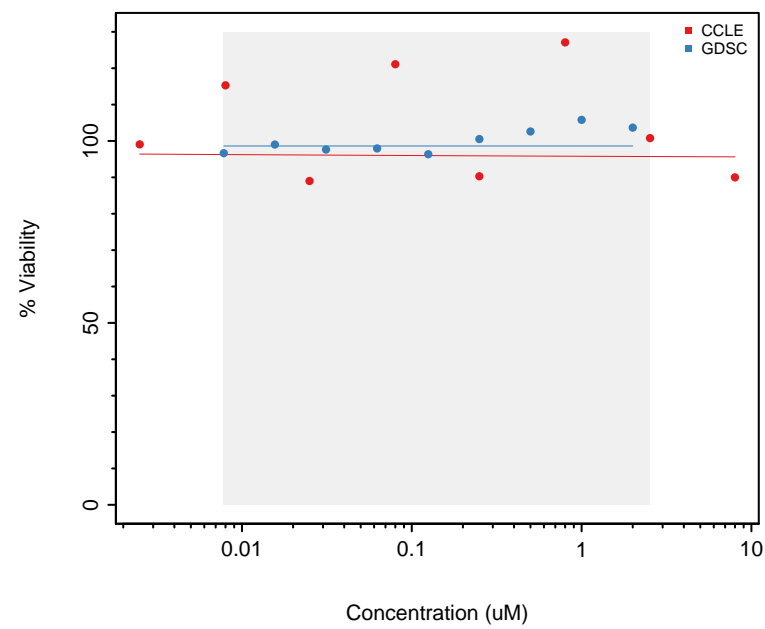

Erlotinib:DOHH-2

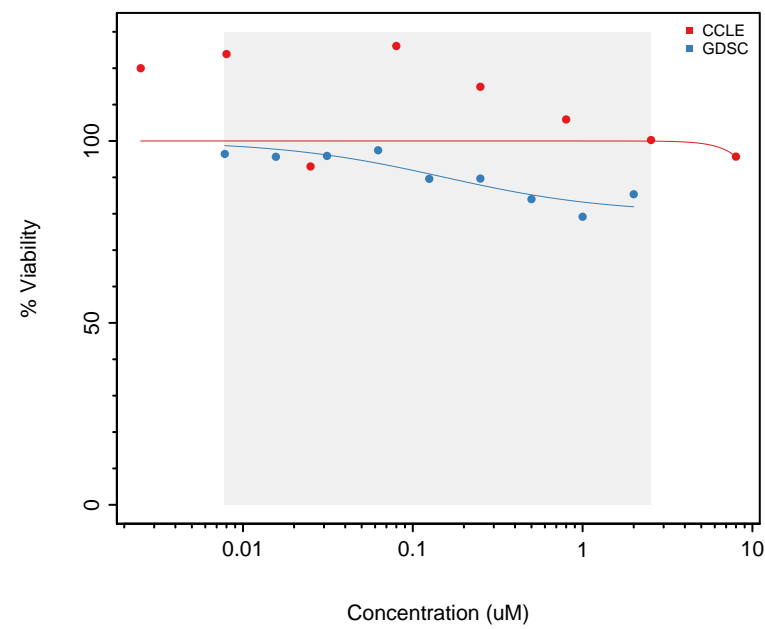

Erlotinib:EB2

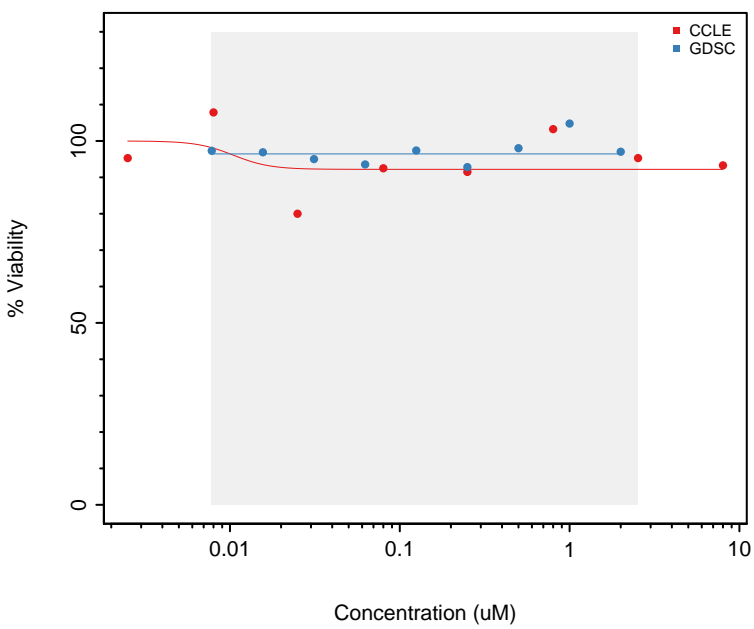

Erlotinib:EM-2

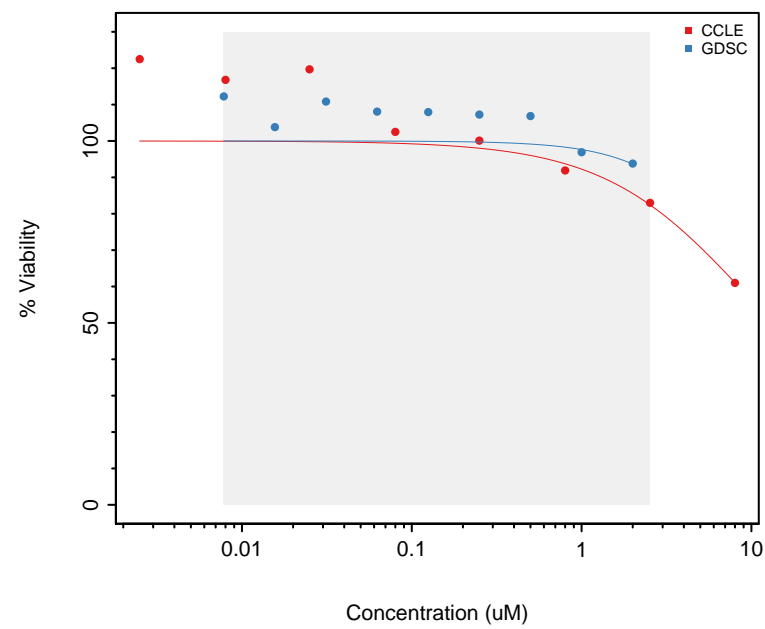

Erlotinib:GB-1

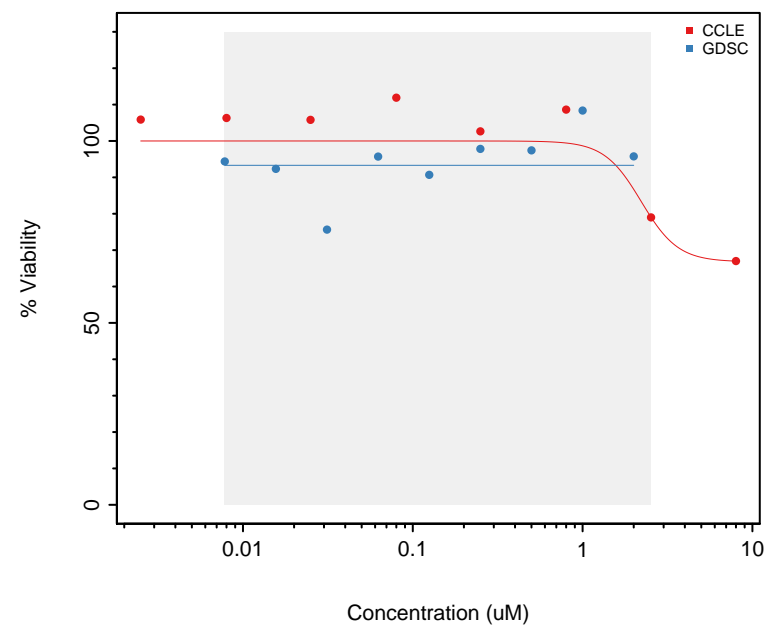

Erlotinib:GCIY

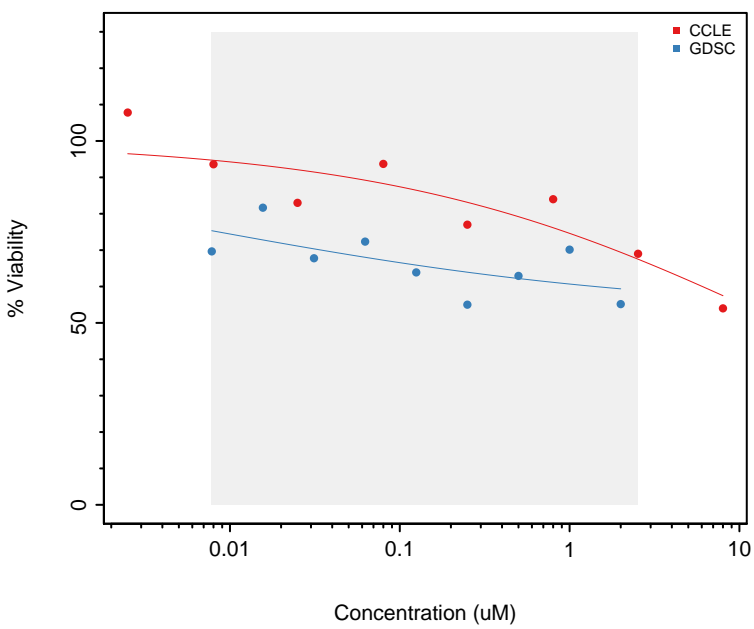

Erlotinib:HCC1187

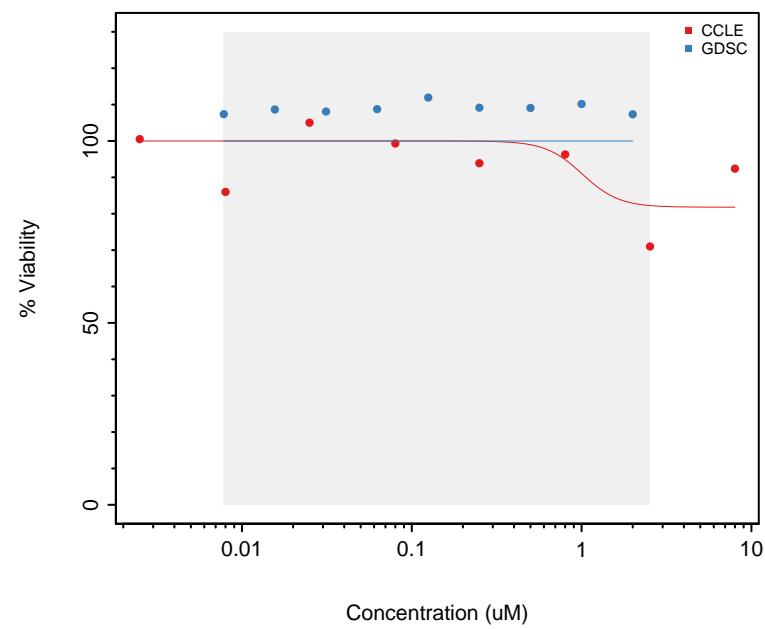

Erlotinib:HD-MY-Z

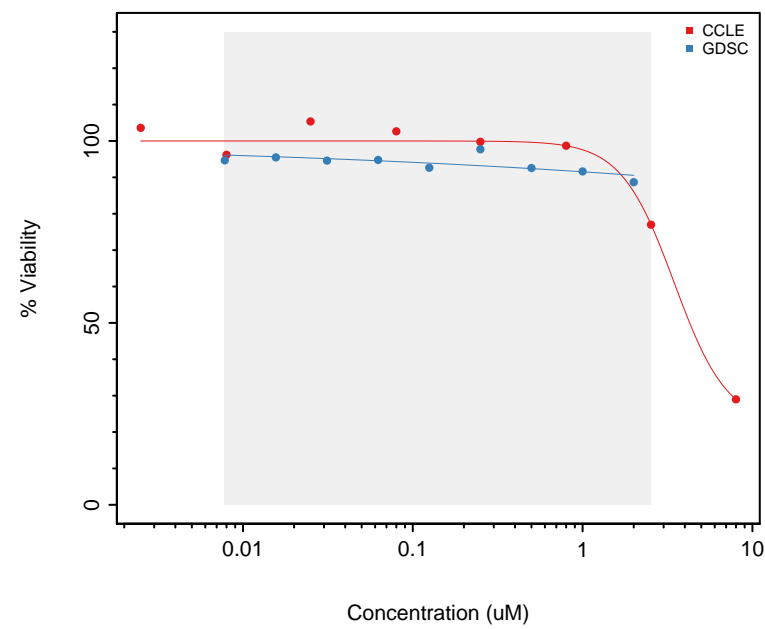

Erlotinib:HH

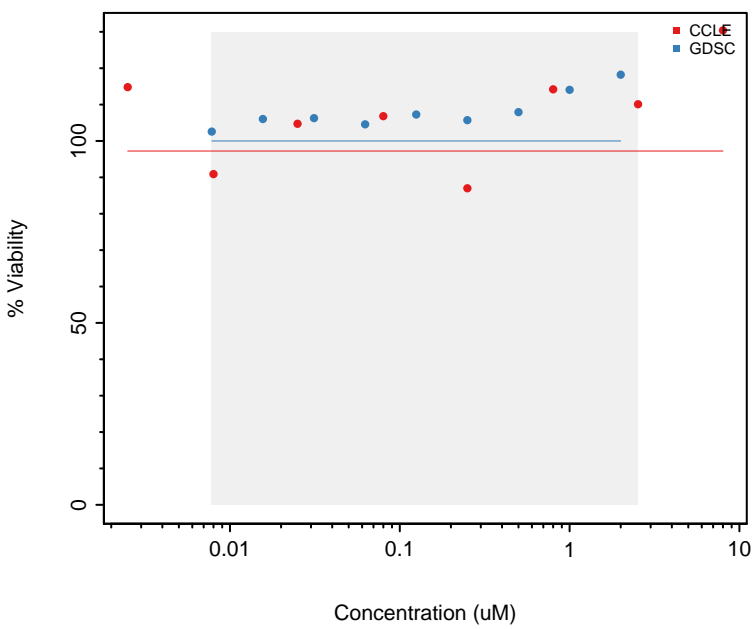

Erlotinib:HT

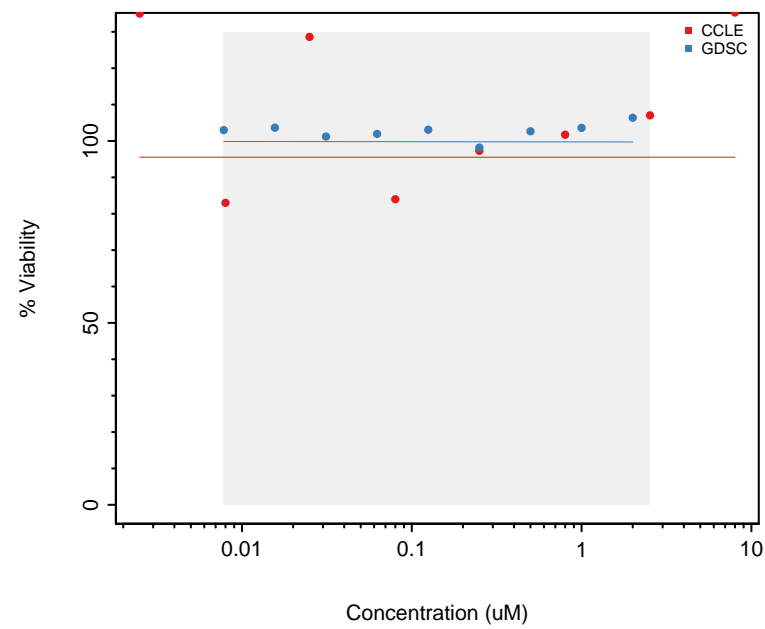

Erlotinib:HT-144

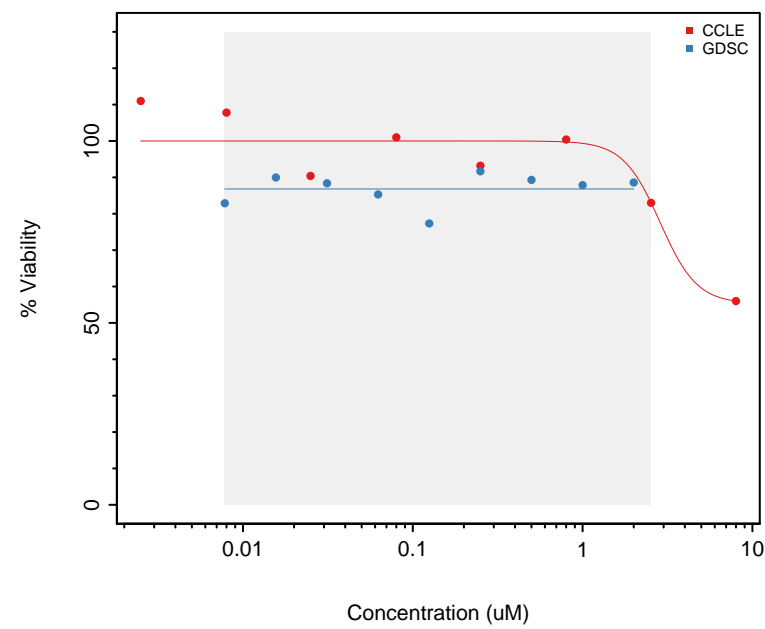

Erlotinib:IST-MES1

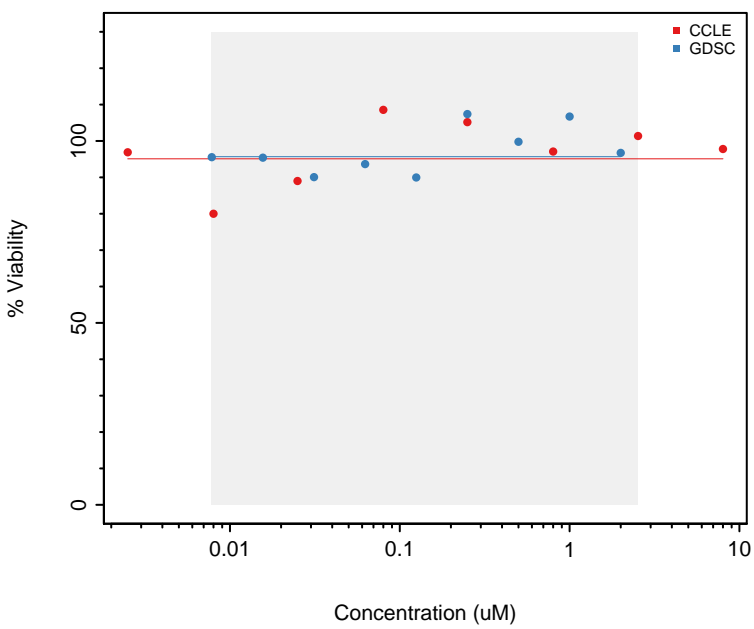

Erlotinib:JVM-3

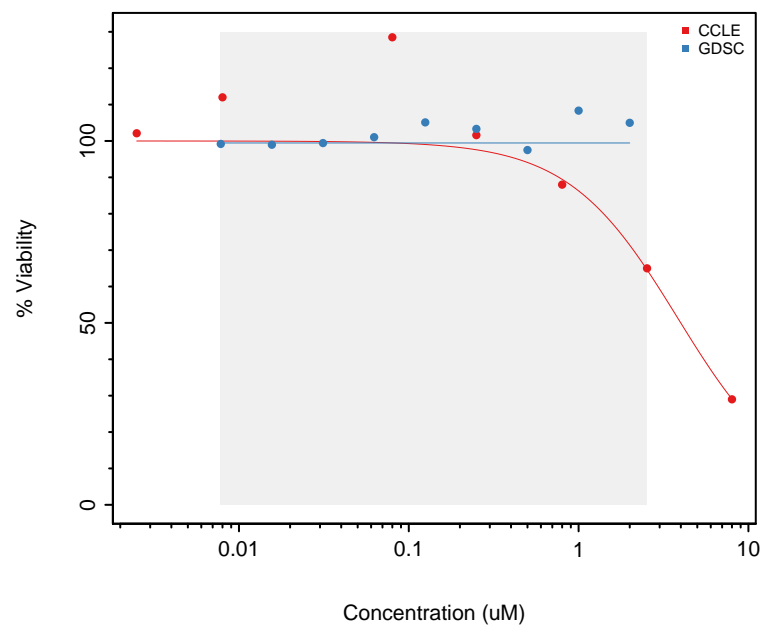

Erlotinib:KALS-1

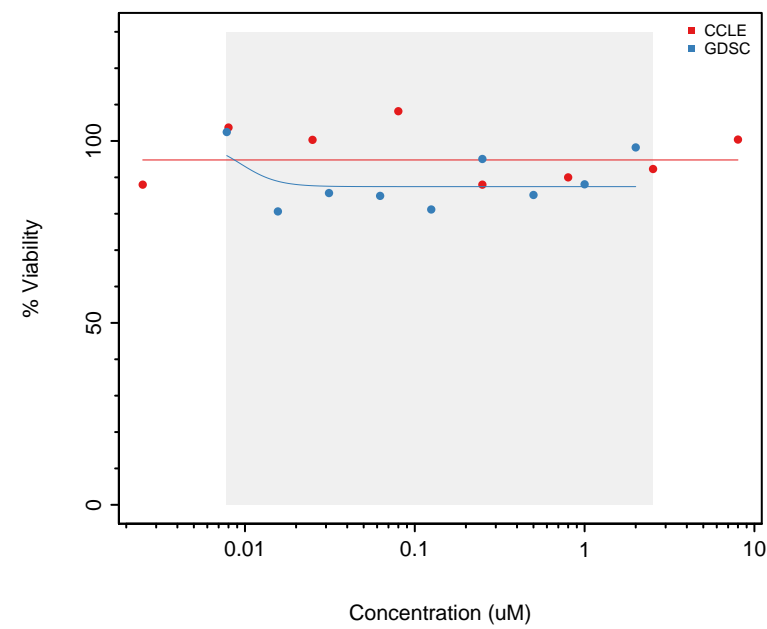

Erlotinib:KARPAS-299

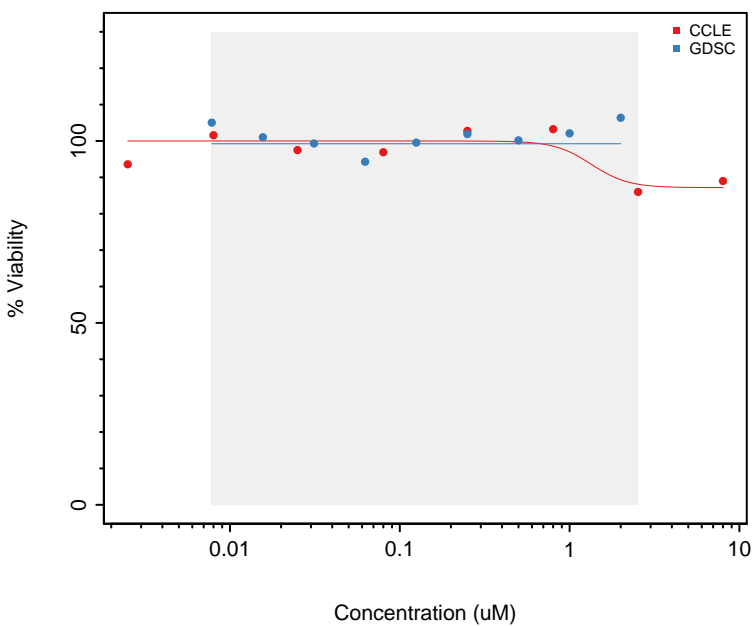

Erlotinib:KARPAS-422

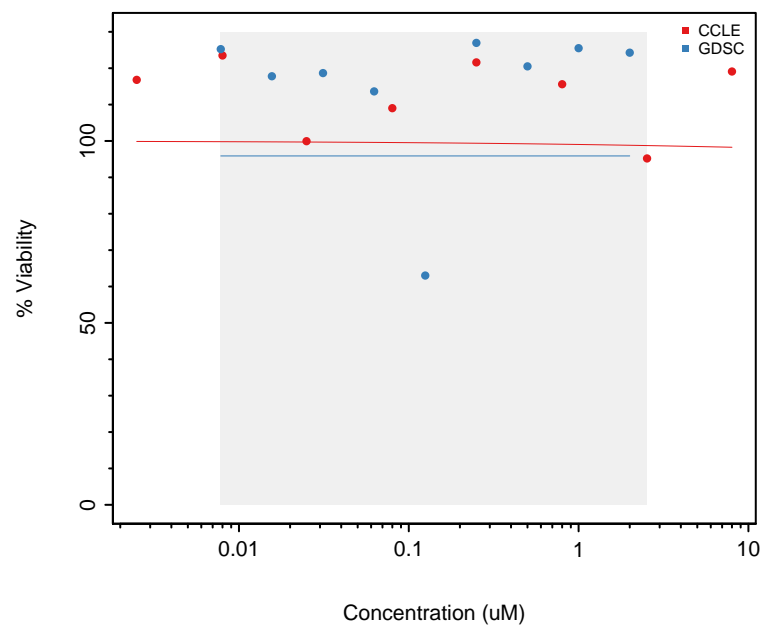

Erlotinib:KG-1

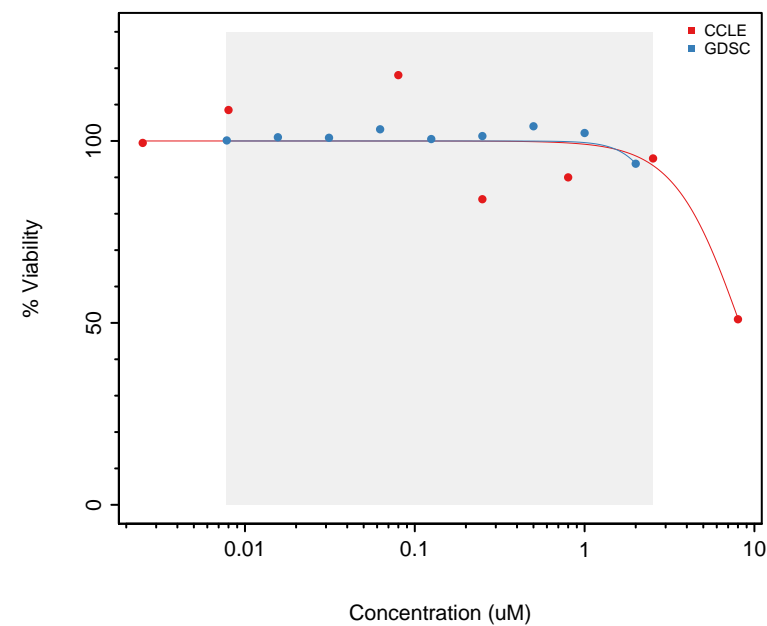

Erlotinib:KNS-42

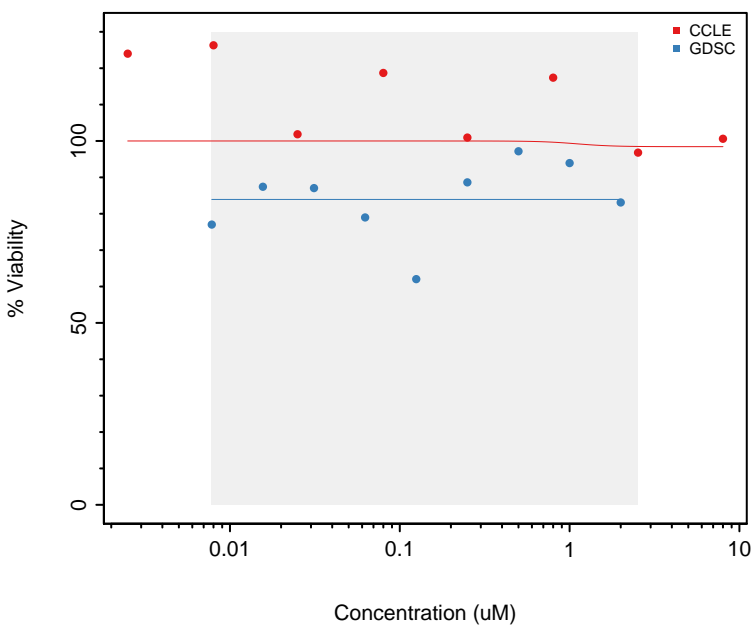

Erlotinib:KNS-81-FD

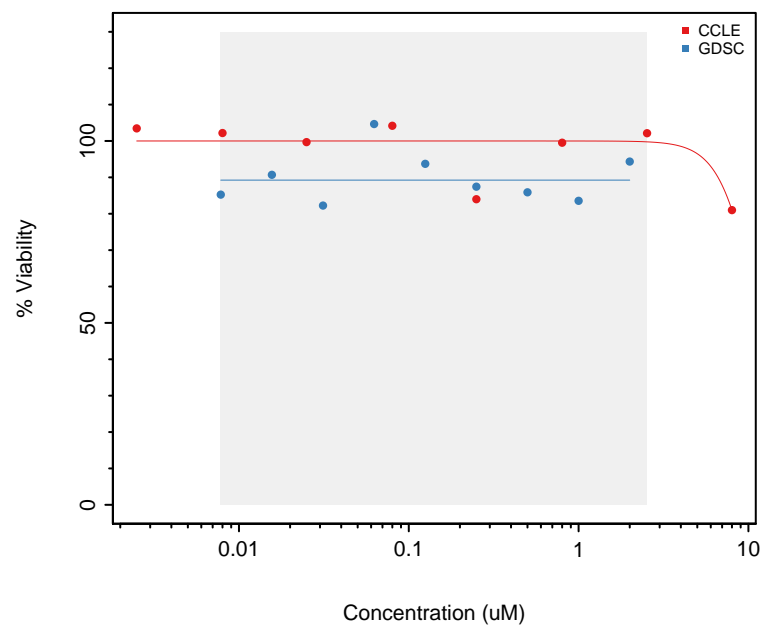

Erlotinib:KU812

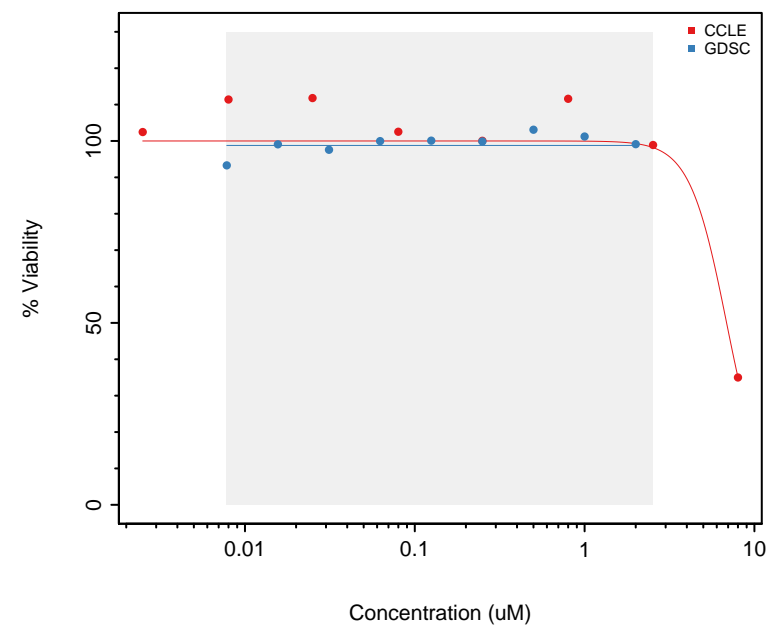

Erlotinib:KURAMOCHI

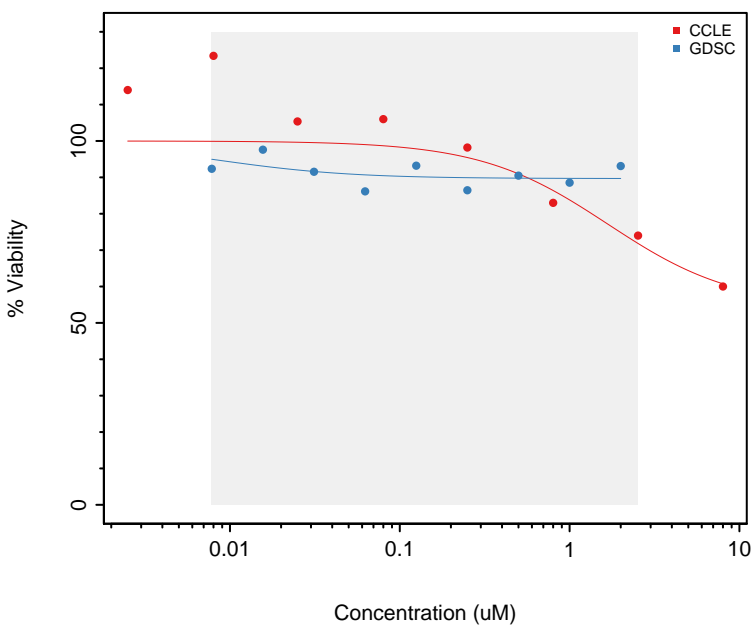

Erlotinib:L-363

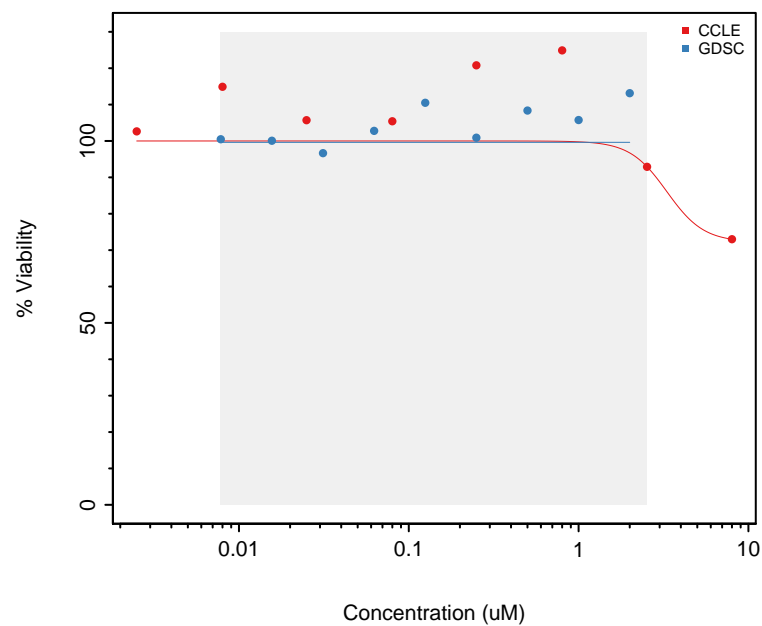

Erlotinib:L-428

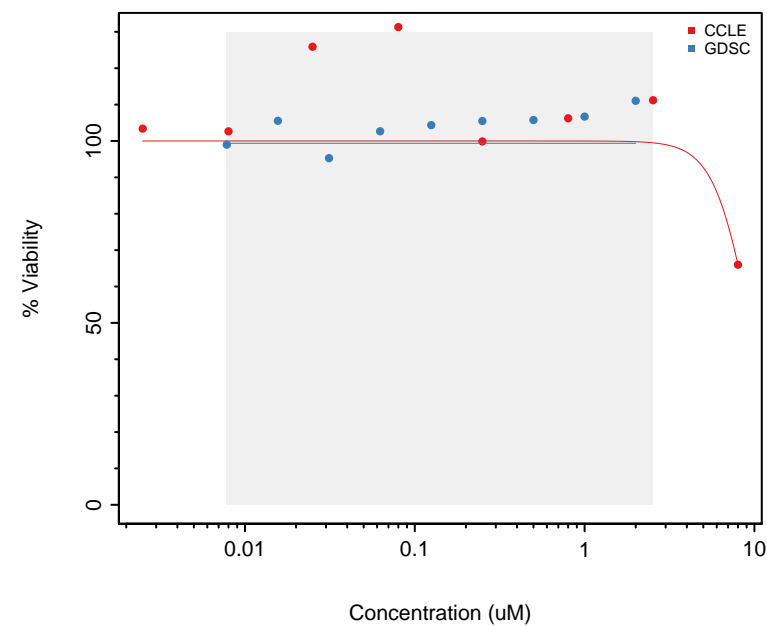

Erlotinib:LOXIMVI

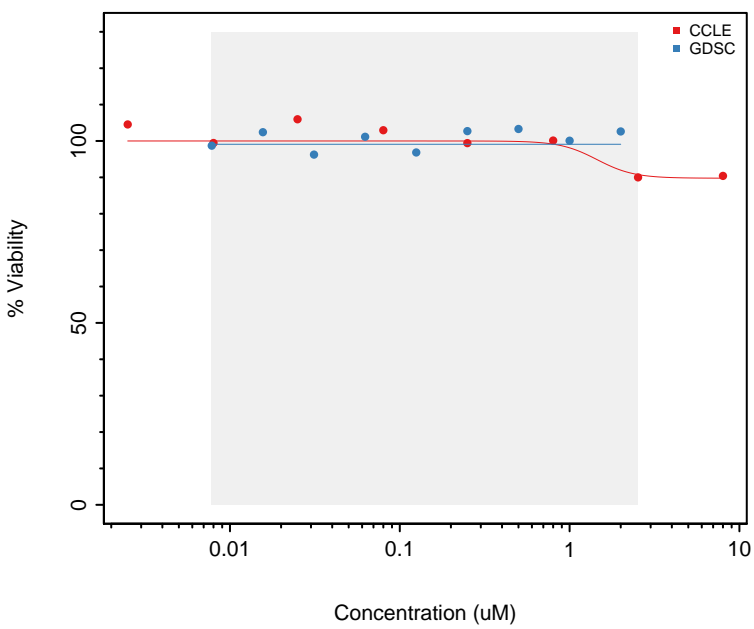

Erlotinib:LP-1

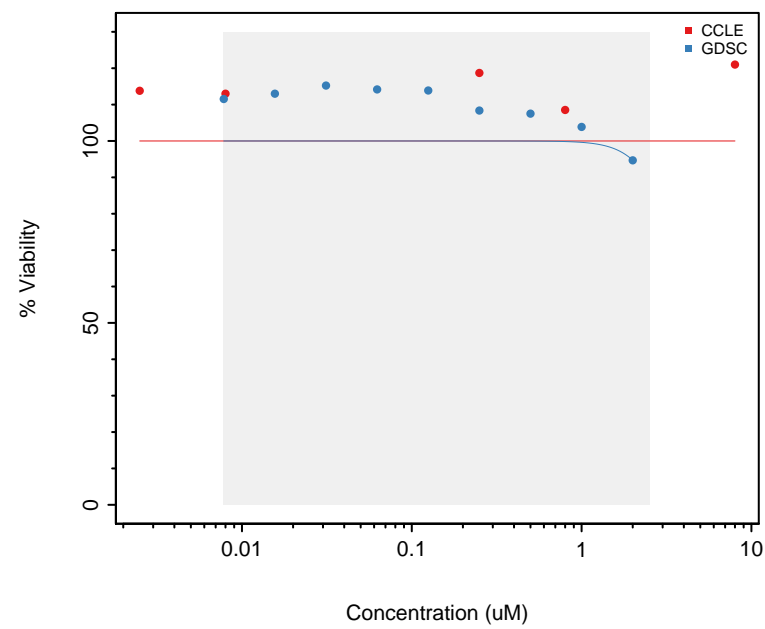

Erlotinib:LS-123

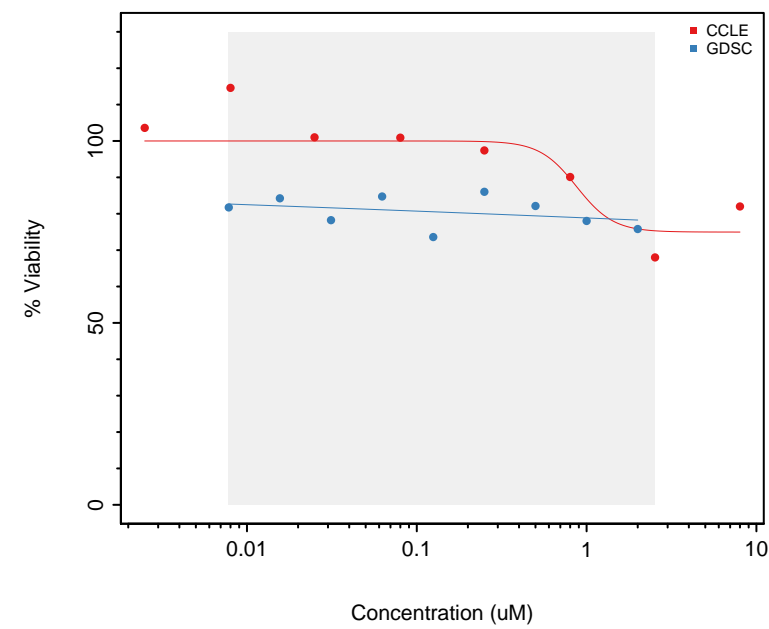

Erlotinib:LS-411N

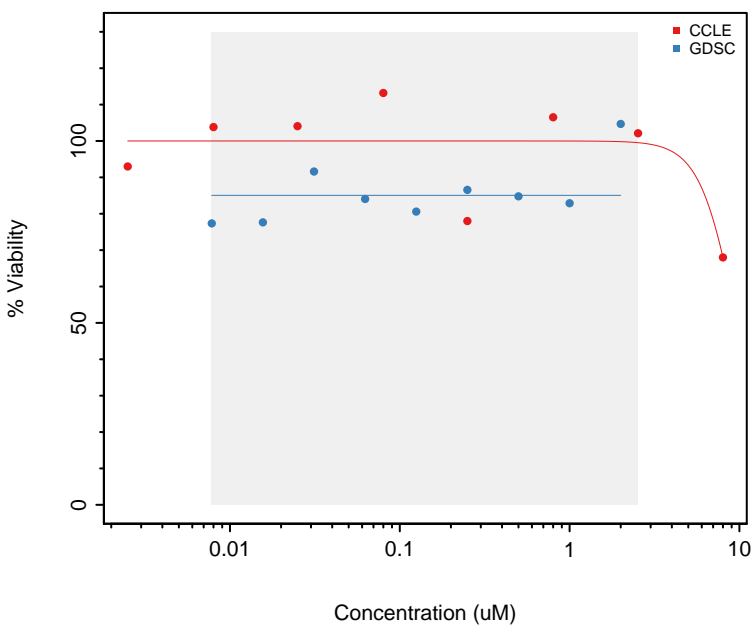

Erlotinib:LS-513

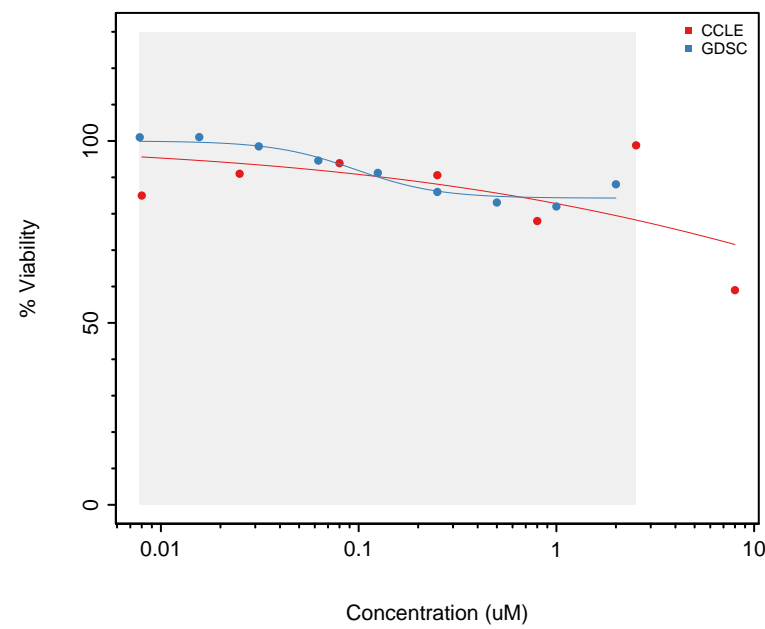

Erlotinib:MC116

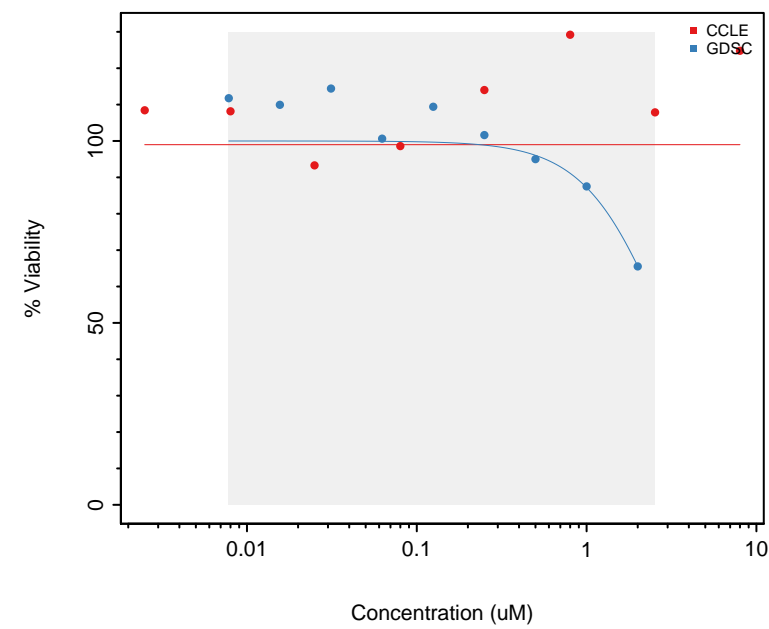

Erlotinib:MEG-01

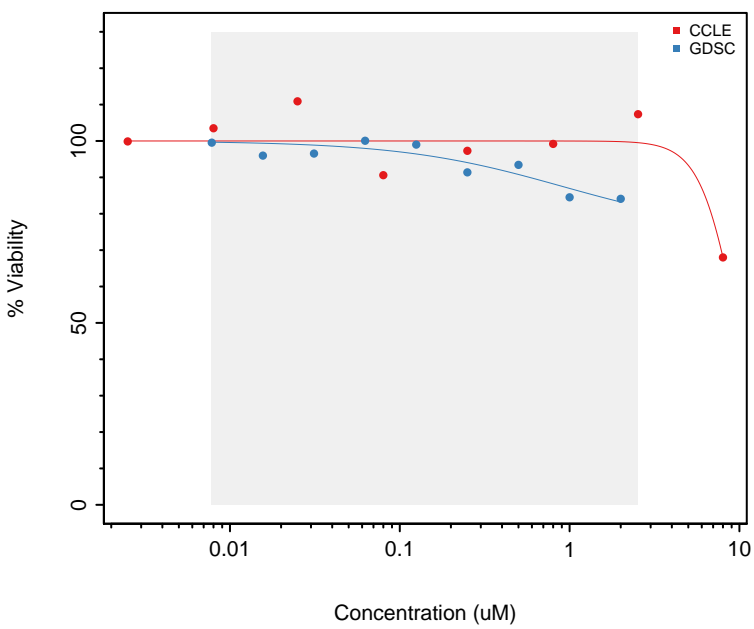

Erlotinib:NCI-H1092

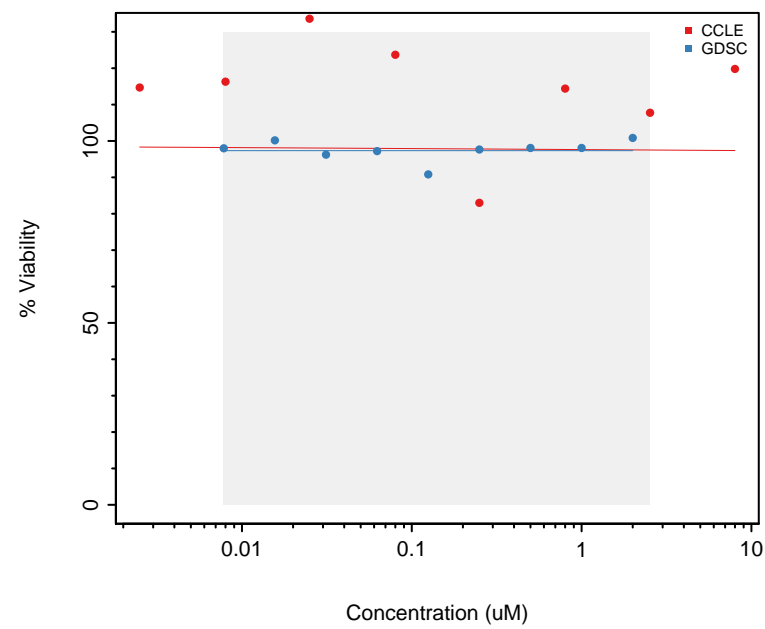

Erlotinib:NCI-H1355

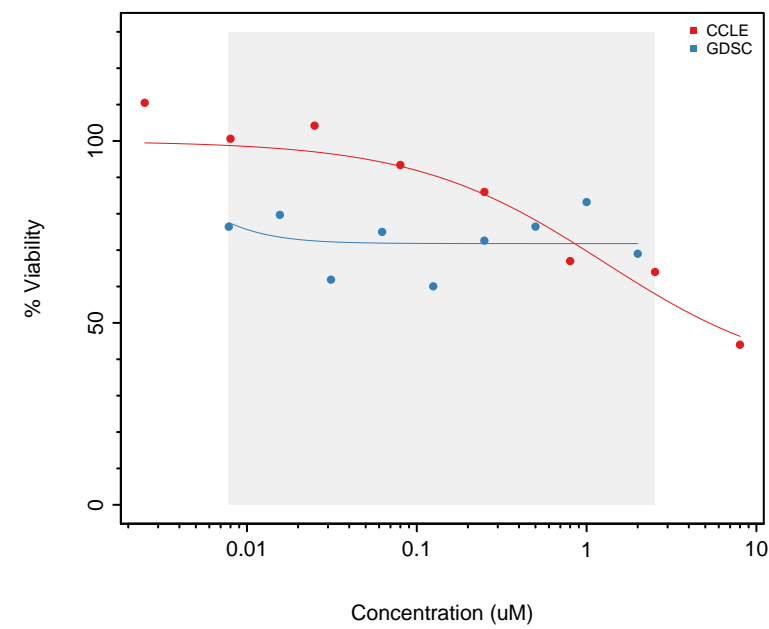

Erlotinib:NCI-H1581

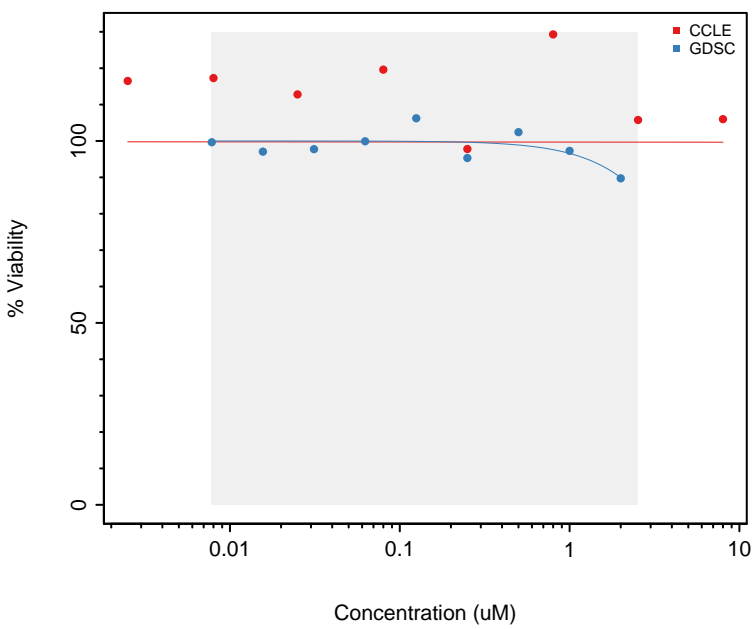

Erlotinib:NCI-H1648

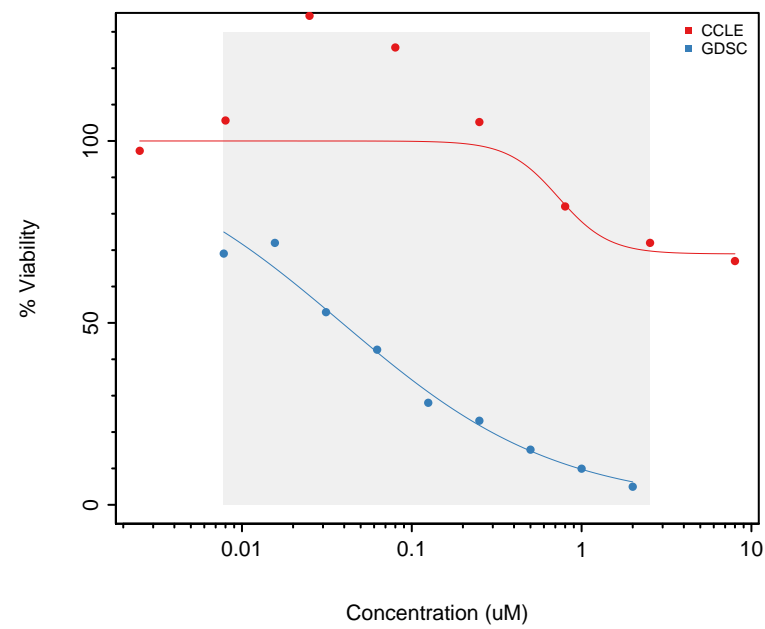

Erlotinib:NCI-H1694

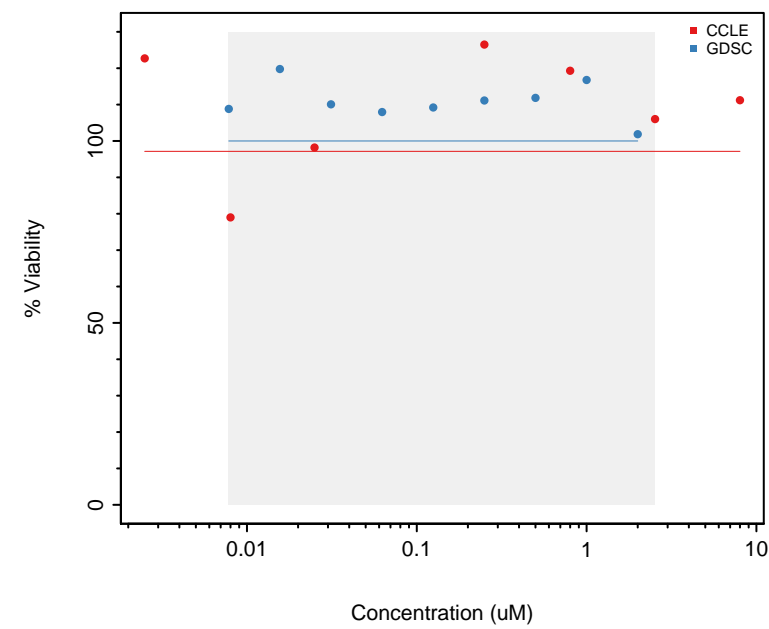

Erlotinib:NCI-H226

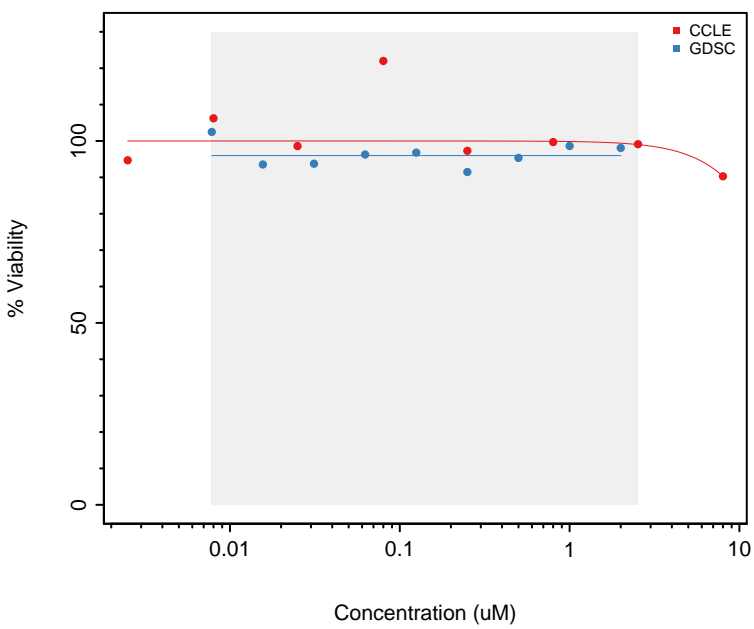

Erlotinib:NCI-H23

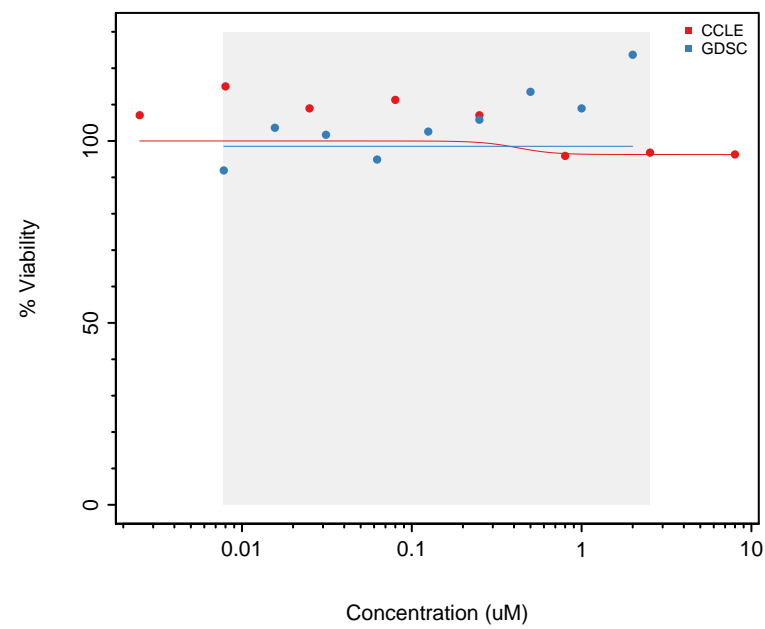

Erlotinib:NCI-H747

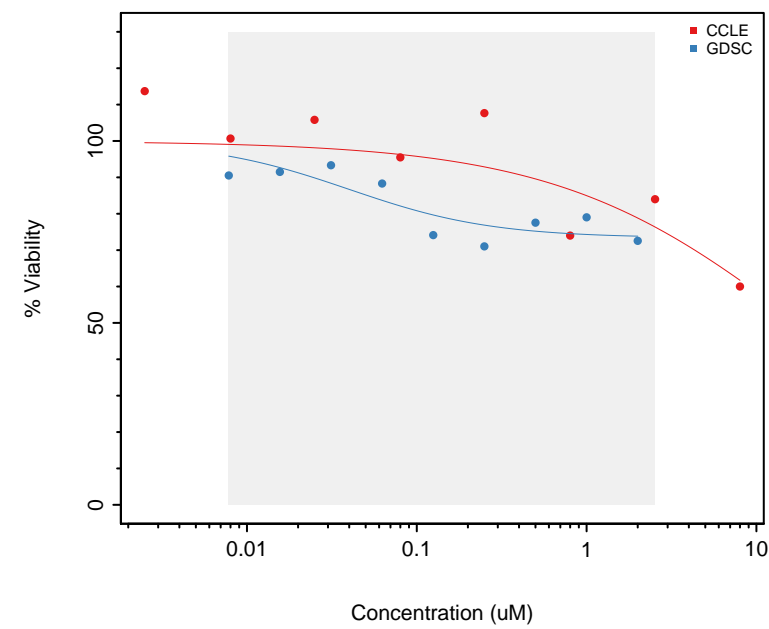

Erlotinib:OCI-AML2

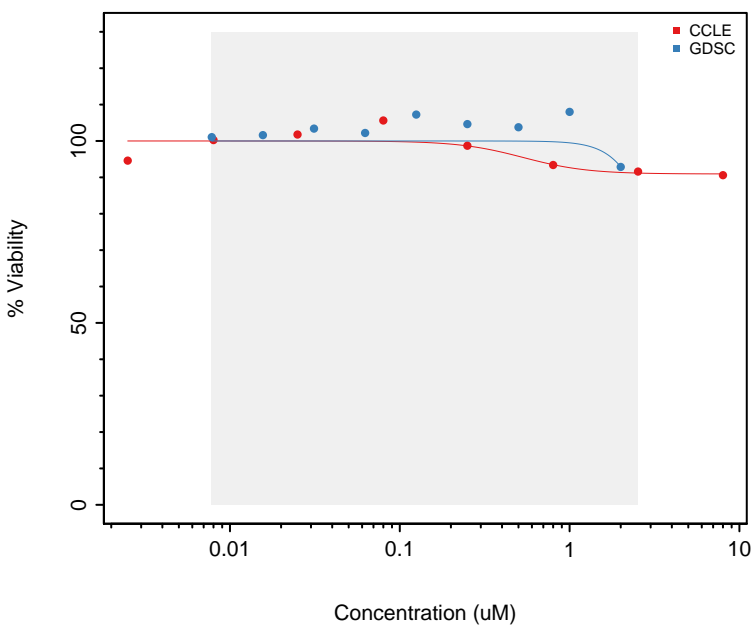

Erlotinib:ONS-76

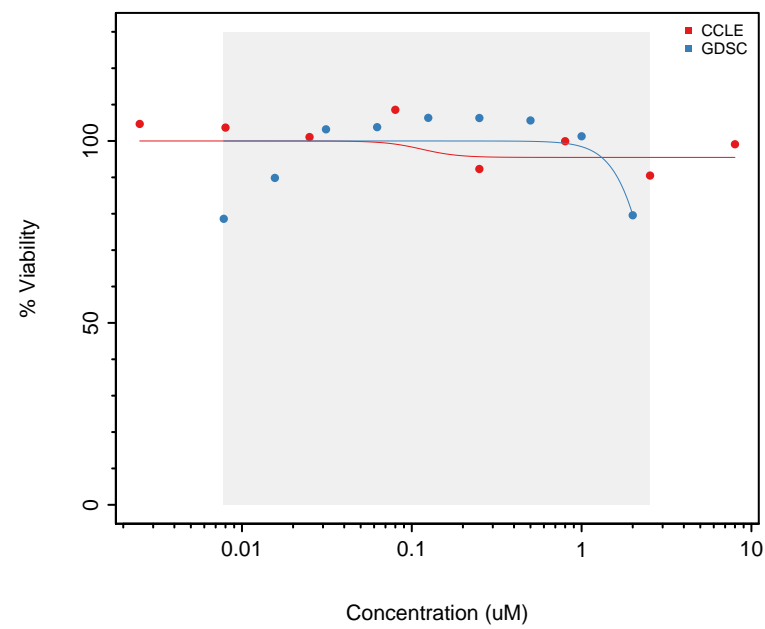

Erlotinib:OPM-2

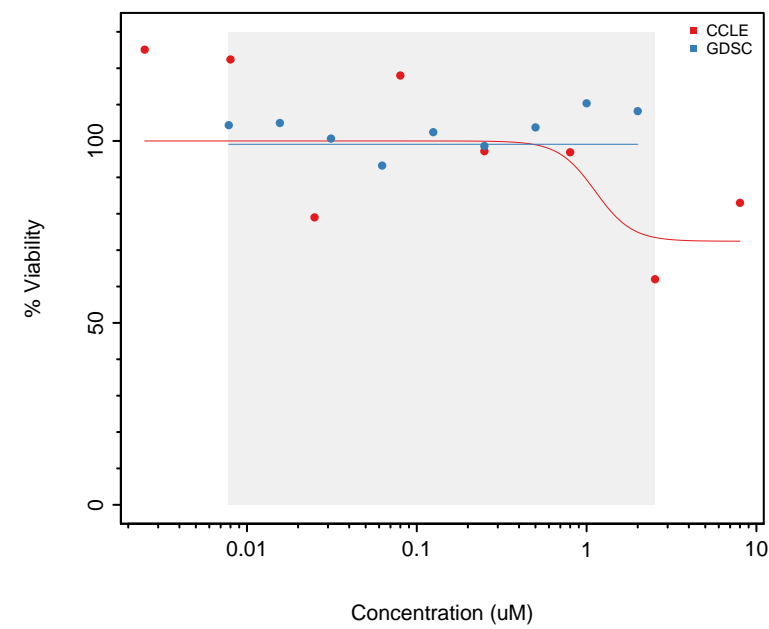

Erlotinib:OVCAR-4

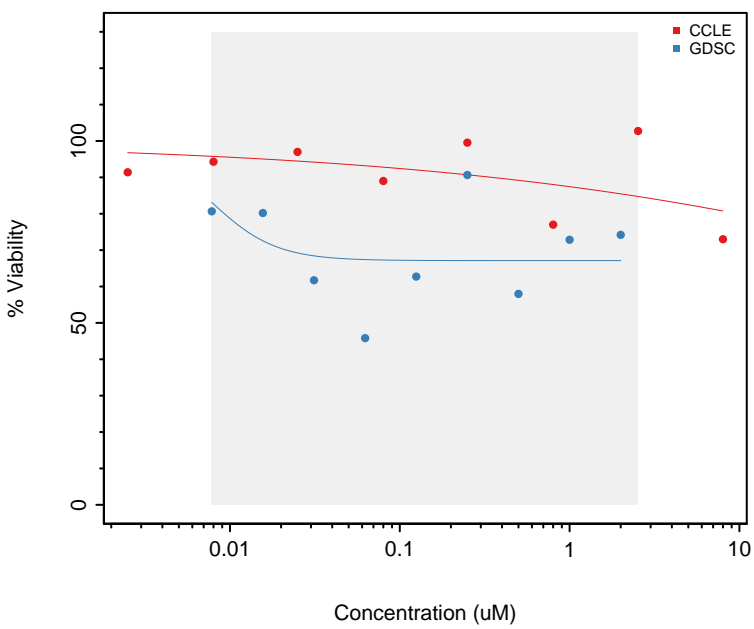

Erlotinib:P31-FUJ

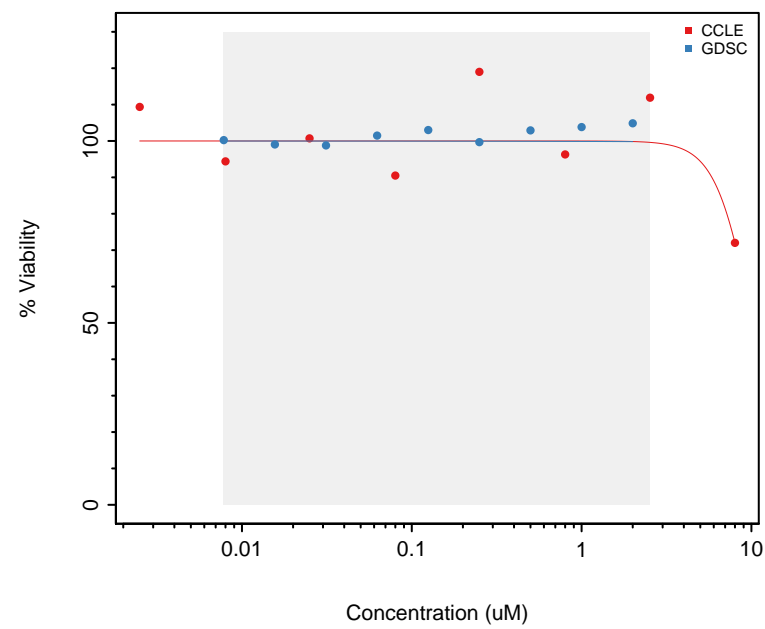

Erlotinib:PSN1

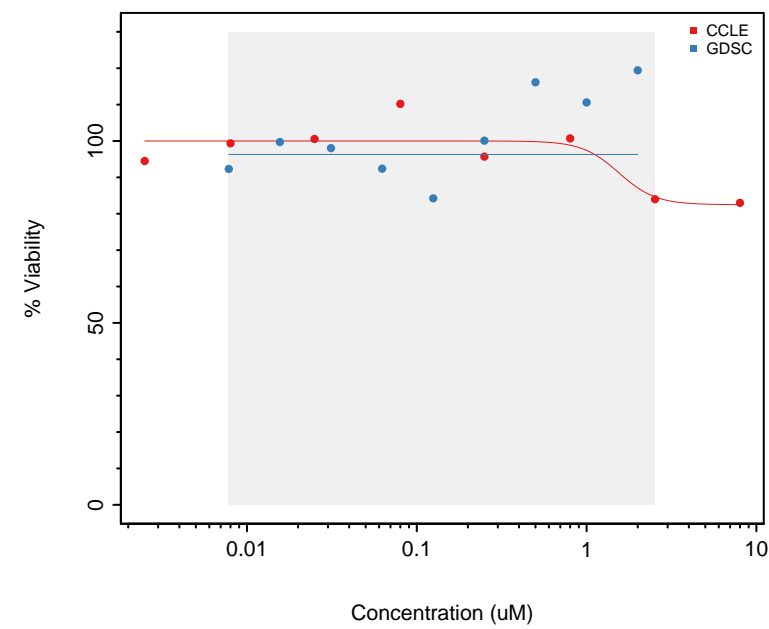

Erlotinib:Raji

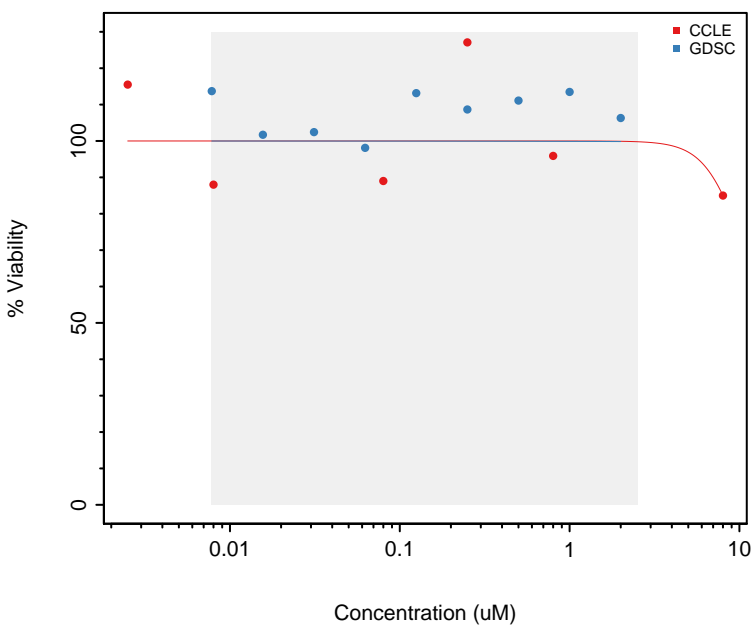

Erlotinib:REH

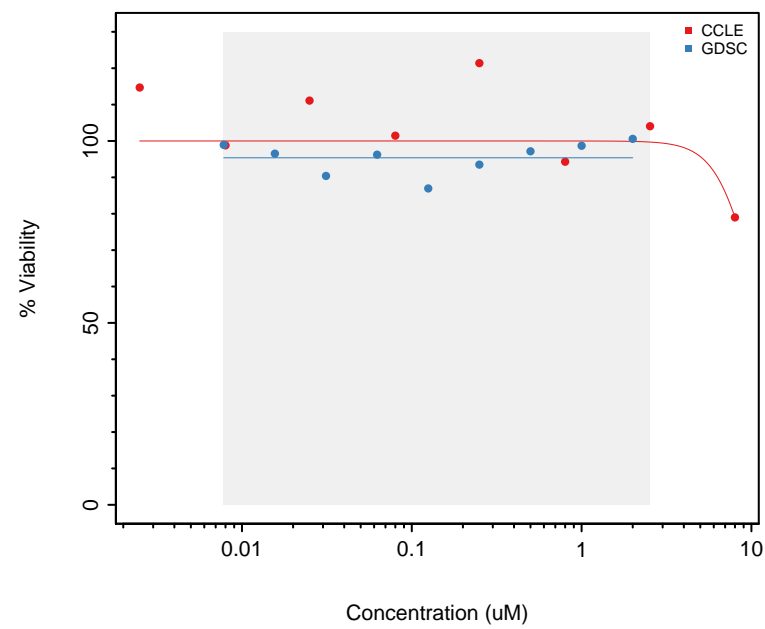

Erlotinib:RL95-2

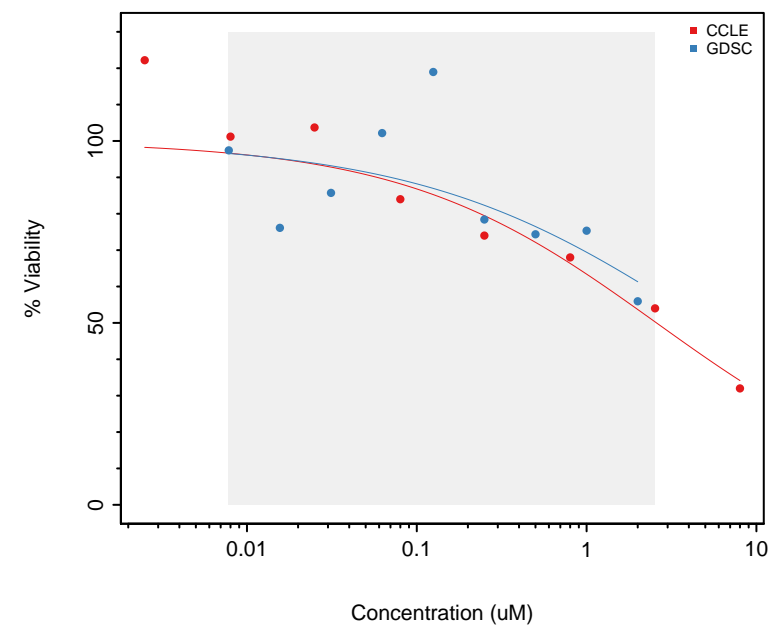

Erlotinib:SF126

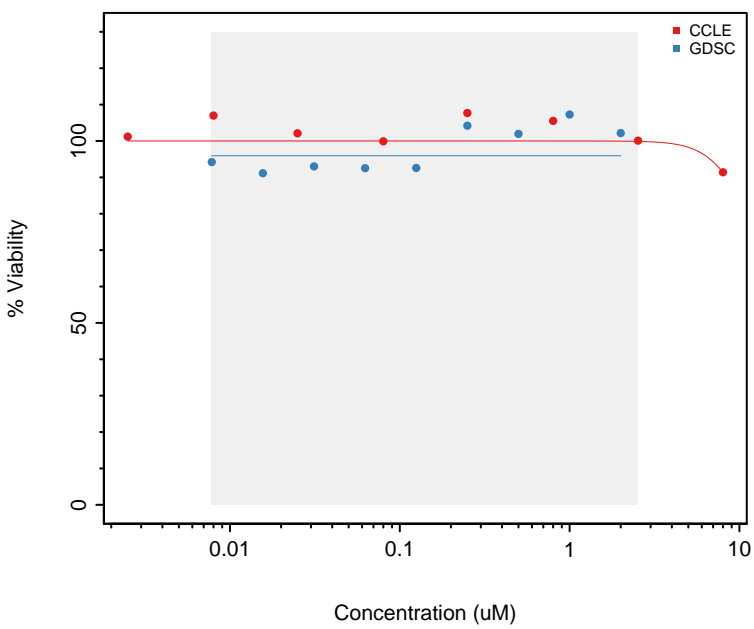

Erlotinib:SHP-77

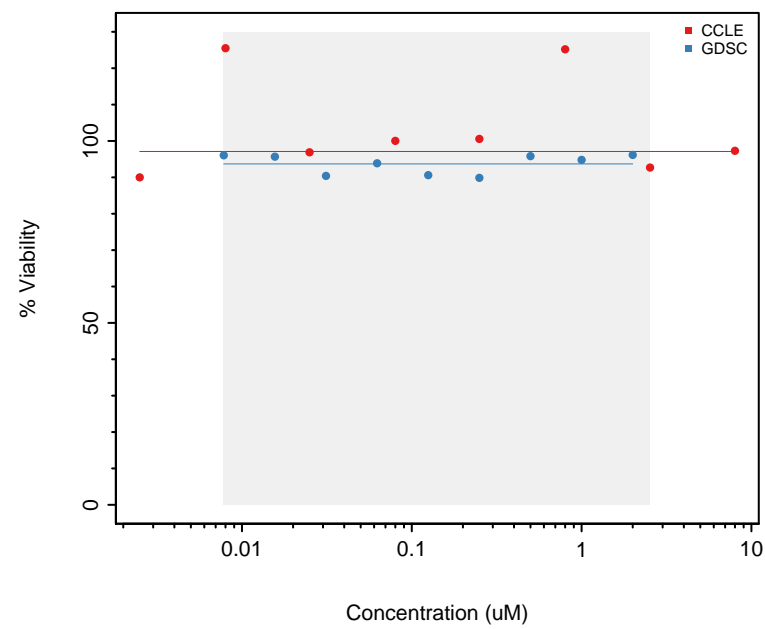

Erlotinib:SIG-M5

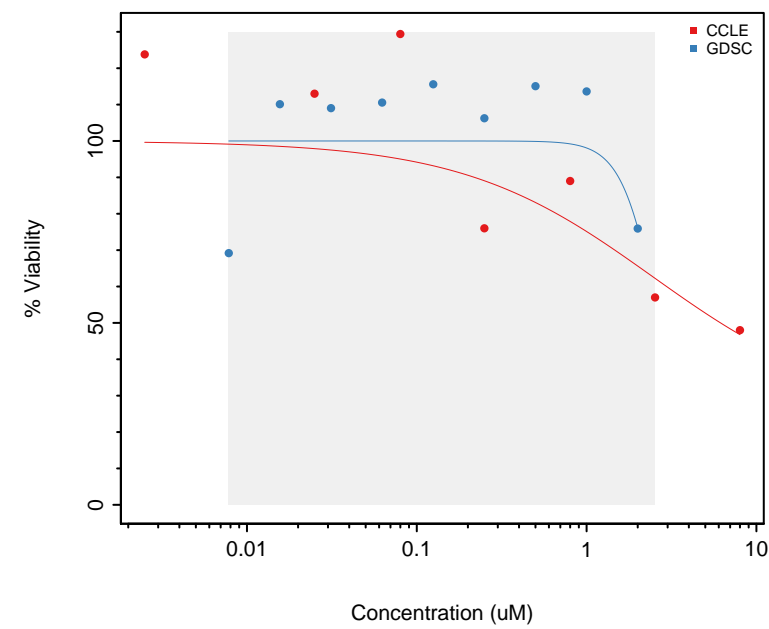

Erlotinib:SIMA

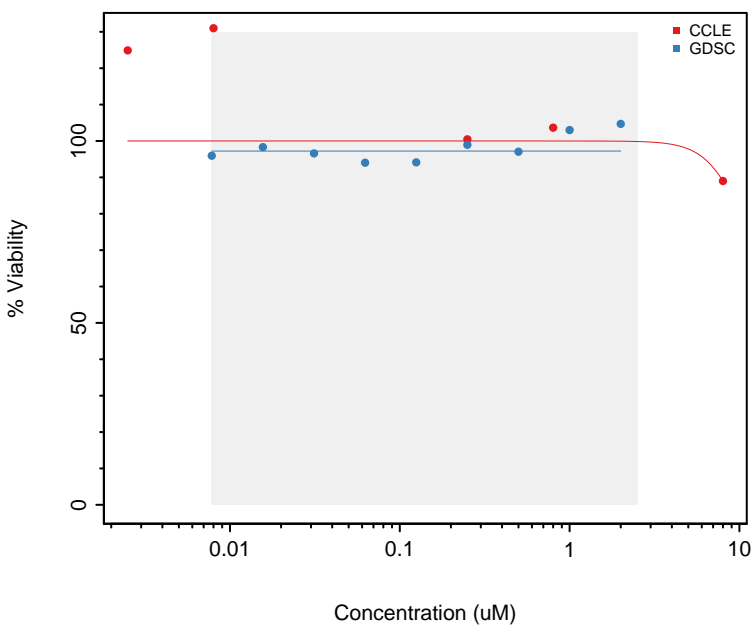

Erlotinib:SJSA-1

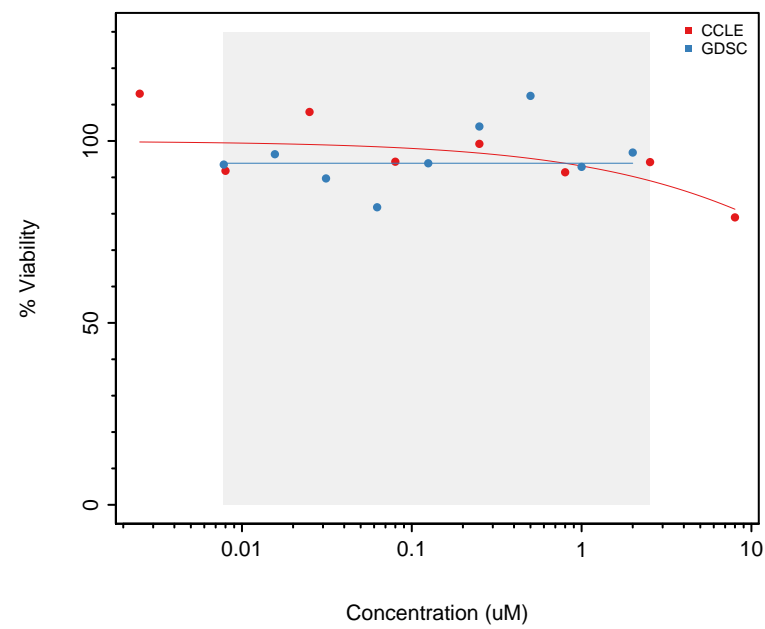

Erlotinib:SK-LMS-1

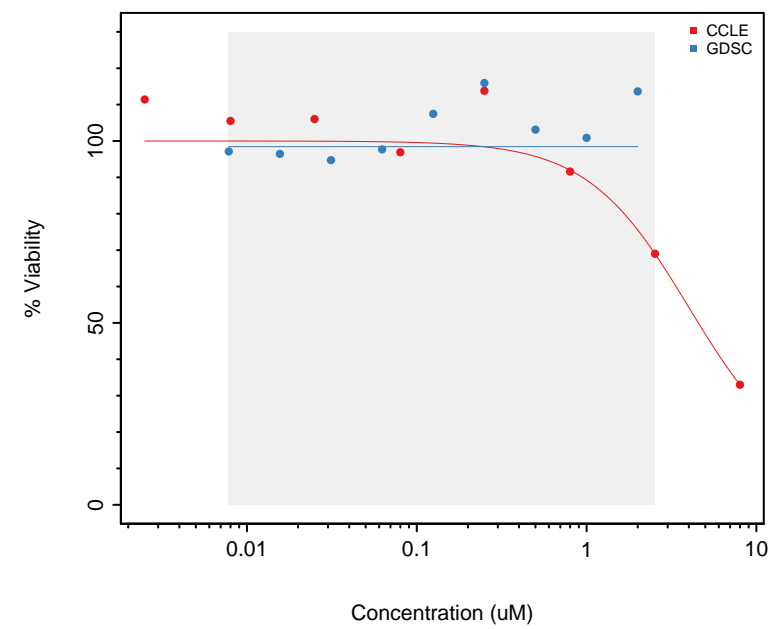

Erlotinib:SK-MEL-2

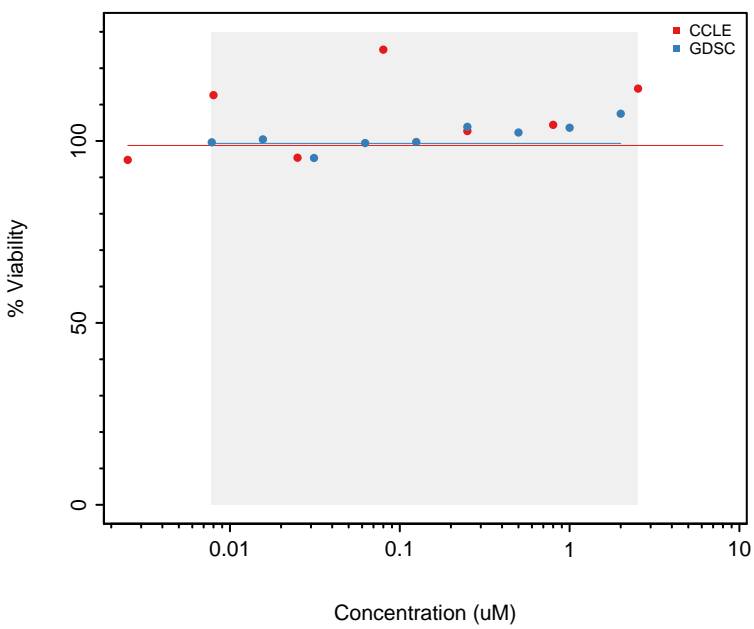

Erlotinib:SK-MM-2

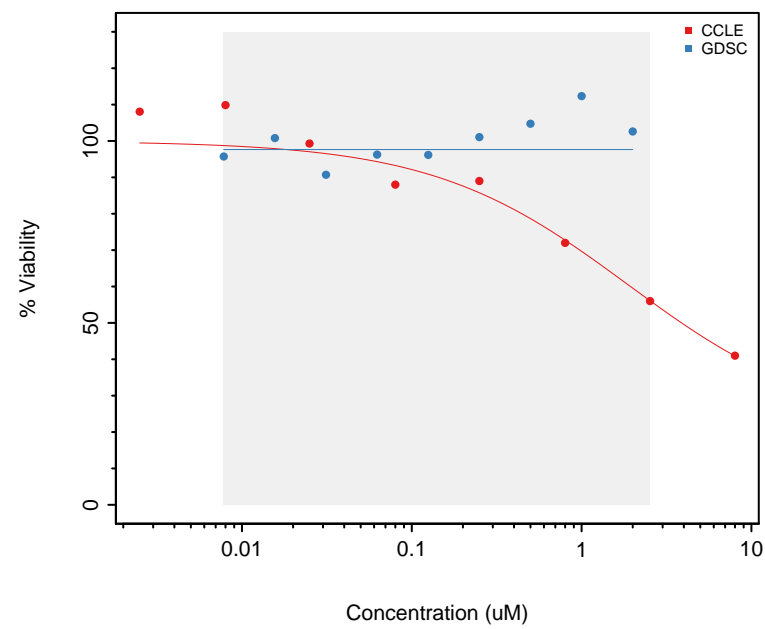

Erlotinib:SK-N-DZ

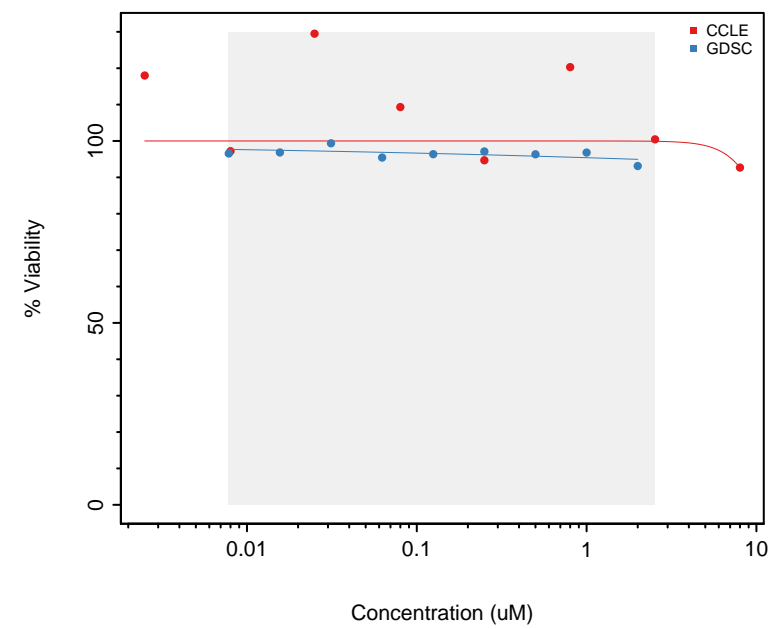

Erlotinib:NCI-SNU-1

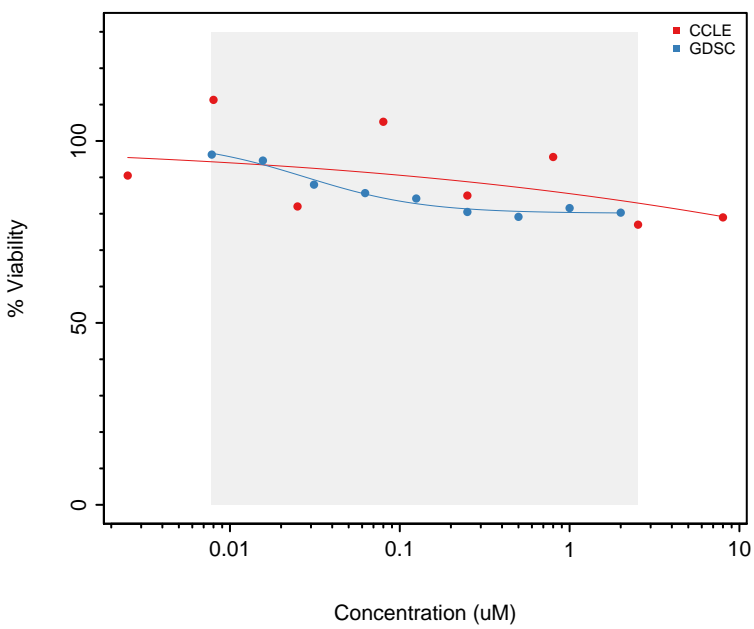

Erlotinib:NCI-SNU-16

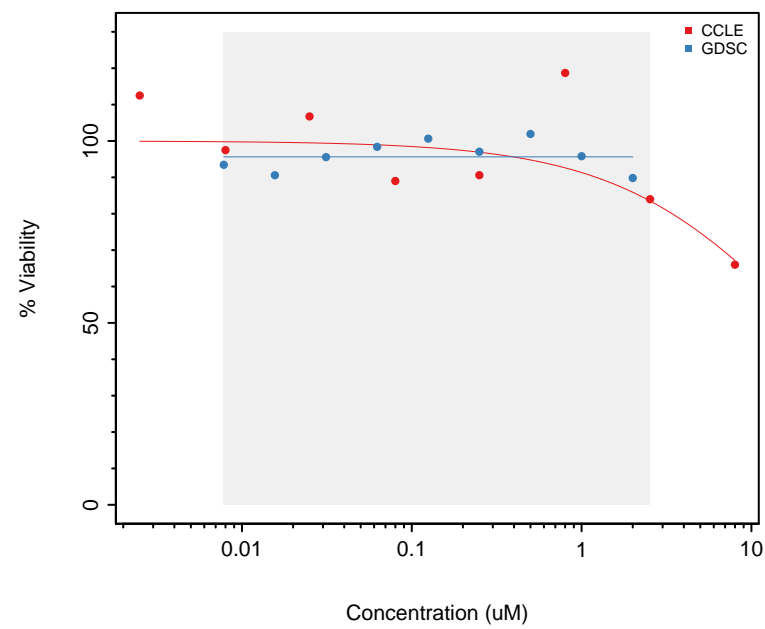

Erlotinib:SUP-T1

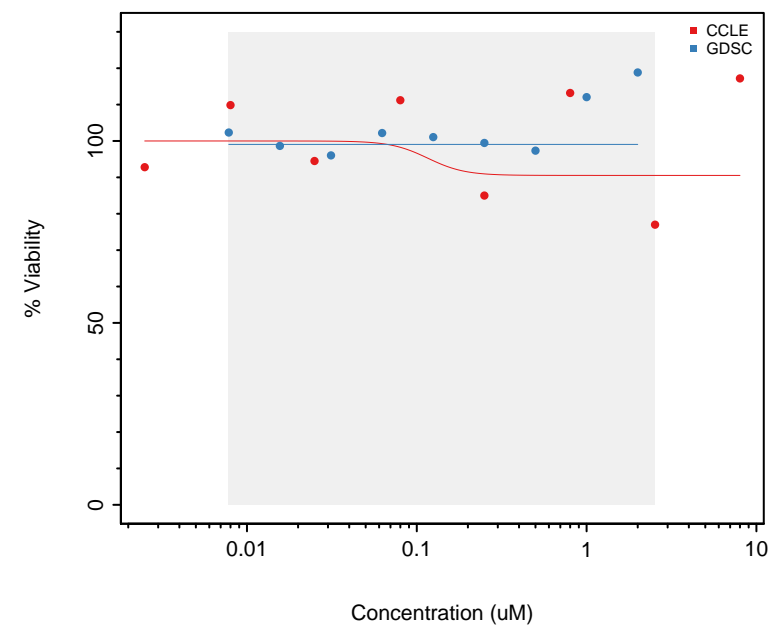



Erlotinib:TE-1

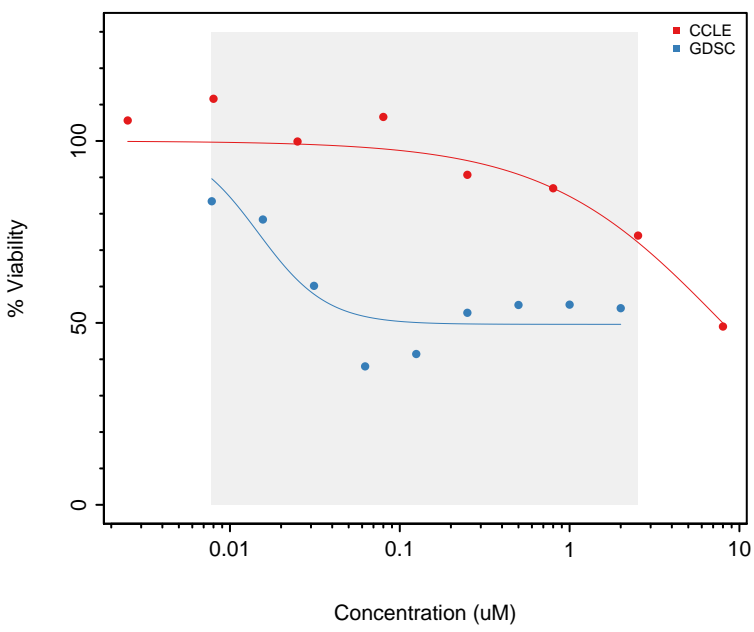

Erlotinib:TE-15

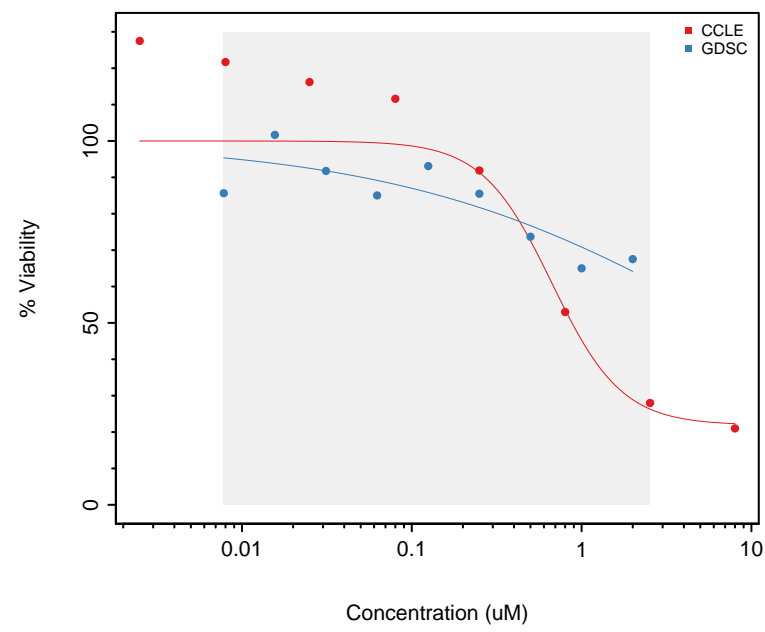

Erlotinib:TE-5

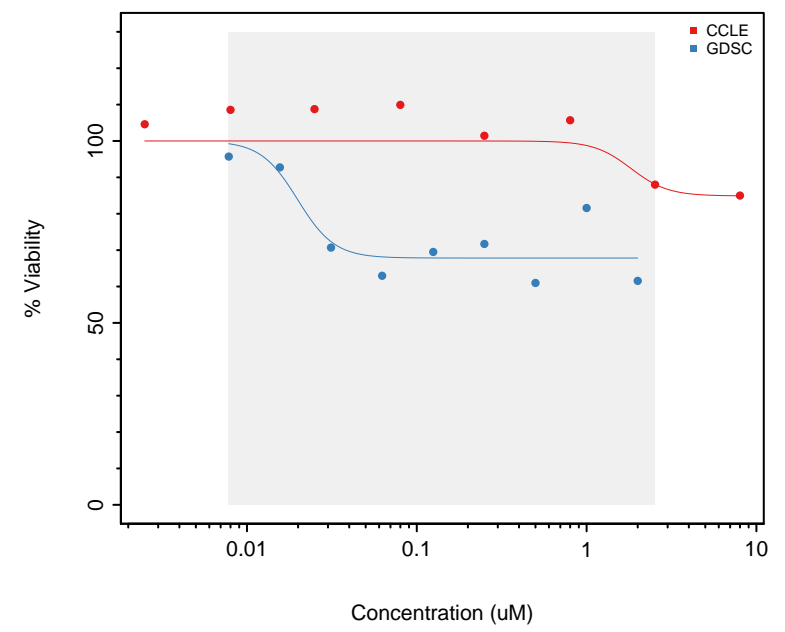

Erlotinib:TE-9

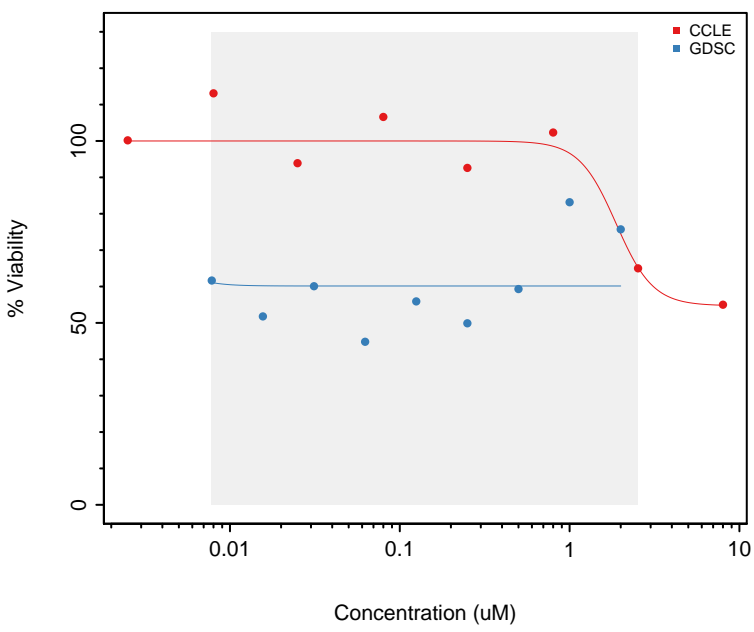

Erlotinib:U-87-MG

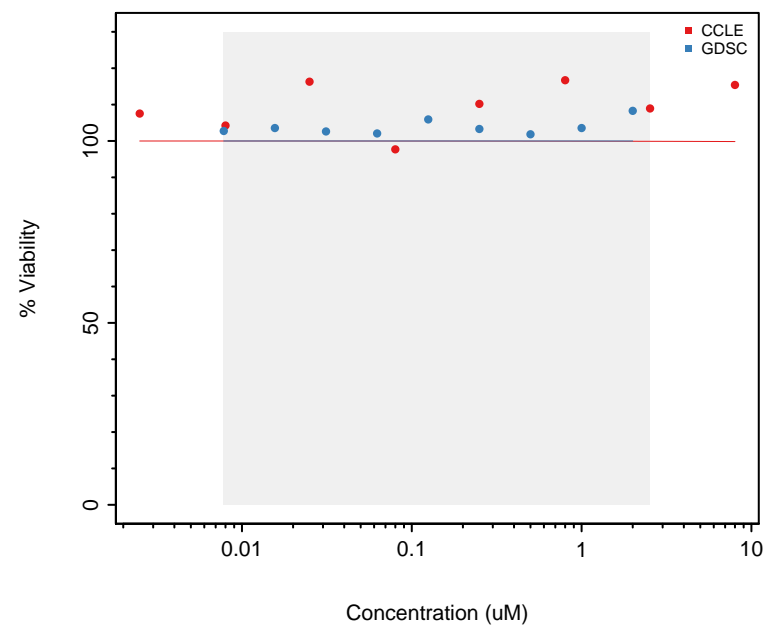

Erlotinib:UACC-257

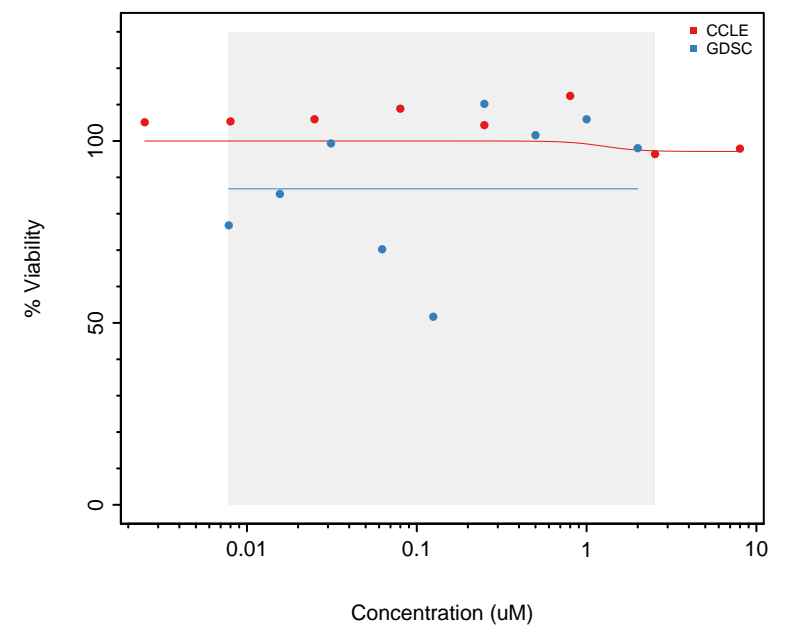

Erlotinib:UACC-812

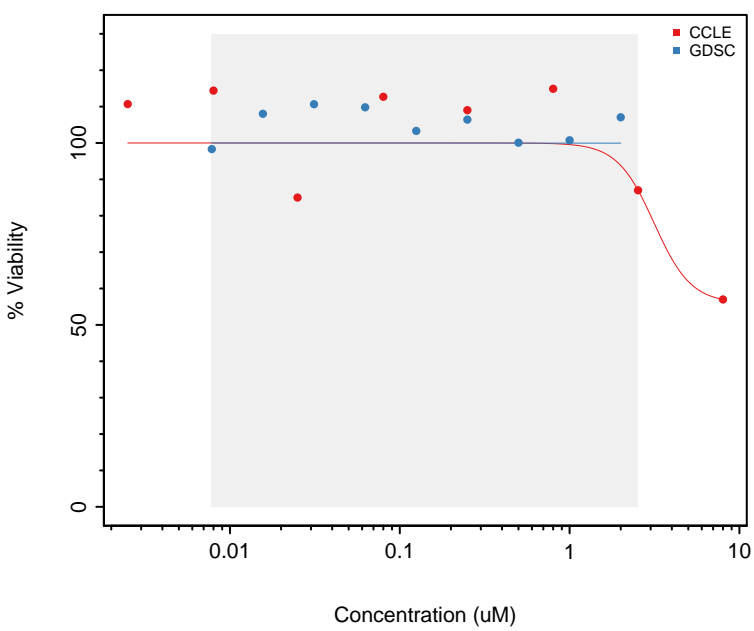

Supplement: Supplementary file [file 026153-3.pdf]
